# Supplementary material for: Prevalence trends in non-alcoholic fatty liver disease at the global, regional and national levels, 1990–2017: a population-based observational study
Source: PubMed Central journal article supplement — BMJ Open. 2020 Aug 3;10(8):e036663. doi: 10.1136/bmjopen-2019-036663 (PMC7402189; doi:10.1136/bmjopen-2019-036663), 2020-08-03
Supplement: bmjopen-2019-036663.draft_revisions.pdf [file bmjopen-2019-036663.draft_revisions.pdf]

# BMJ Open

BMJ Open is committed to open peer review. As part of this commitment we make the peer review history of every article we publish publicly available.

When an article is published we post the peer reviewers' comments and the authors' responses online. We also post the versions of the paper that were used during peer review. These are the versions that the peer review comments apply to.

The versions of the paper that follow are the versions that were submitted during the peer review process. They are not the versions of record or the final published versions. They should not be cited or distributed as the published version of this manuscript.

BMJ Open is an open access journal and the full, final, typeset and author-corrected version of record of the manuscript is available on our site with no access controls, subscription charges or pay-per-view fees (<http://bmjopen.bmj.com>).

If you have any questions on BMJ Open's open peer review process please email [info.bmjopen@bmj.com](mailto:info.bmjopen@bmj.com)

# BMJ Open

## Increasing prevalence of nonalcoholic fatty liver disease at the global, regional, and national level, 1990-2017

|                               |                                                                                                                                                                                                                                                                                                                                                                                          |
|-------------------------------|------------------------------------------------------------------------------------------------------------------------------------------------------------------------------------------------------------------------------------------------------------------------------------------------------------------------------------------------------------------------------------------|
| Journal:                      | <i>BMJ Open</i>                                                                                                                                                                                                                                                                                                                                                                          |
| Manuscript ID                 | bmjopen-2019-036663                                                                                                                                                                                                                                                                                                                                                                      |
| Article Type:                 | Original research                                                                                                                                                                                                                                                                                                                                                                        |
| Date Submitted by the Author: | 27-Dec-2019                                                                                                                                                                                                                                                                                                                                                                              |
| Complete List of Authors:     | Ge, Xiaojun; Zunyi Medical University, Department of Laboratory Medicine<br>Zheng, Limei; Zunyi Medical University, Department of Laboratory Medicine<br>Wang, Mei; Zunyi Medical University, Department of Laboratory Medicine<br>Du, Yuxuan; Zunyi Medical University, Department of Laboratory Medicine<br>Jiang, Junyao; Zunyi Medical University, Department of Laboratory Medicine |
| Keywords:                     | EPIDEMIOLOGY, Adult gastroenterology < GASTROENTEROLOGY, Hepatobiliary disease < GASTROENTEROLOGY                                                                                                                                                                                                                                                                                        |
|                               |                                                                                                                                                                                                                                                                                                                                                                                          |

SCHOLARONE™  
Manuscripts

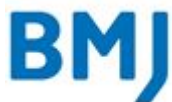

I, the Submitting Author has the right to grant and does grant on behalf of all authors of the Work (as defined in the below author licence), an exclusive licence and/or a non-exclusive licence for contributions from authors who are: i) UK Crown employees; ii) where BMJ has agreed a CC-BY licence shall apply, and/or iii) in accordance with the terms applicable for US Federal Government officers or employees acting as part of their official duties; on a worldwide, perpetual, irrevocable, royalty-free basis to BMJ Publishing Group Ltd ("BMJ") its licensees and where the relevant Journal is co-owned by BMJ to the co-owners of the Journal, to publish the Work in this journal and any other BMJ products and to exploit all rights, as set out in our [licence](#).

The Submitting Author accepts and understands that any supply made under these terms is made by BMJ to the Submitting Author unless you are acting as an employee on behalf of your employer or a postgraduate student of an affiliated institution which is paying any applicable article publishing charge ("APC") for Open Access articles. Where the Submitting Author wishes to make the Work available on an Open Access basis (and intends to pay the relevant APC), the terms of reuse of such Open Access shall be governed by a Creative Commons licence – details of these licences and which [Creative Commons](#) licence will apply to this Work are set out in our licence referred to above.

Other than as permitted in any relevant BMJ Author's Self Archiving Policies, I confirm this Work has not been accepted for publication elsewhere, is not being considered for publication elsewhere and does not duplicate material already published. I confirm all authors consent to publication of this Work and authorise the granting of this licence.

## Original article

### Increasing prevalence of nonalcoholic fatty liver disease at the global, regional, and national level, 1990-2017

Xiao-jun Ge<sup>1\*</sup>, Li-mei Zheng<sup>1\*</sup>, Mei Wang<sup>1</sup>, Yu-Xuan Du<sup>1</sup>, Jun-Yao Jiang<sup>1</sup>

1. Department of Laboratory Medicine, The Second Affiliated Hospital of Zun Yi Medical University, Zun Yi, Guizhou, 563000

\* These authors contributed equally

Corresponding author: Xiao-jun Ge, Department of Laboratory Medicine, The Second Affiliated Hospital of Zun Yi Medical University, Zun Yi, Guizhou, 563000, China.

Tel:+86-15338526285

Fax:+86-0851-27596297

E-mail: gxj\_199421@126.com

**Running title:** Global prevalence of NAFLD

**Abbreviations:** NAFLD, Nonalcoholic fatty liver disease; EAPC, estimated average percentage change; GBD, global burden of disease.

**Contributors:** Study conception and design: JJ, GX; Data collection: GX, DY, and ZL; Data analyses: GX, DY, and ZL; Results interpretations: All authors; Manuscript drafting: GX and DY; Manuscript proofing: All authors.

#### **Funding**

The present study was supported by the National Nature Science Foundation of China (grant no. 81560487).

#### **Strengths and limitations of this study**

- Our study comprehensively investigated the temporal trends of NAFLD prevalence



- 31 at the global, regional, and national level.
- 32 ● Our results provided insights for further understanding of NAFLD disease burden.
  - 33 ● The increasing trend of NAFLD prevalence alarmed us that NAFLD has emerged  
34 as a new public health concern worldwide and more efficient prevention strategies  
35 are urgently needed.
  - 36 ● All data used in our study were derived from mathematical estimates rather than  
37 surveillance data.

38

39 **Patient and public involvement:** No patient involved.

40

41

## 42 **Abstract**

43 **Objectives** Nonalcoholic fatty liver disease (NAFLD) is the leading cause of end-stage  
44 liver diseases. Knowing the NAFLD prevalence and quantifying its temporal trends at  
45 the global, regional, and national level is critical to understand the NAFLD disease  
46 burden and to establish more tailored prevention strategies.

47 **Design** Population-based observational study

48 **Setting** The global, 21 regions, and 195 countries or territories.

49 **Main outcomes measure** The estimated annual percentage change (EAPC) of  
50 prevalence of NAFLD

51 **Results** Worldwide, the prevalent case number of NAFLD increased from 391.2  
52 million in 1990 to 882.1 million in 2017, with the prevalence rate increased from 8.2%  
53 to 10.9% during this period. The increasing trend was consistent in both sexes. The  
54 prevalent case number was highest in East Asia, followed by South Asia and North  
55 African and Middle East. The highest NAFLD prevalence was observed in North  
56 African and Middle East. Whereas the greatest increase was detected in Western Europe,  
57 followed by Tropical Latin America and High-income North America.

58 **Conclusions** Nearly all countries or territories experienced a significant increase in  
59 NAFLD prevalence. The greatest increase was observed in Oman. Approximately all  
60 countries were shown a significant increasing trend in NAFLD prevalence over the last

61 three decades. The extensive increase alarmed us that NAFLD has emerged as a new  
62 public health concern worldwide and more efficient prevention strategies are urgently  
63 needed.

64  
65 **Key words:** NAFLD; global; prevalence; liver disease; increase.

## 68 **Introduction**

69 Over the last three decades, nonalcoholic fatty liver disease (NAFLD) has gone from  
70 an obscure liver disease to the most prominent chronic liver disease worldwide (1, 2).  
71 It is a growing cause of end-stage liver disease and is recognized as an etiology of  
72 hepatocellular cancer (HCC), even in the absence of underlying cirrhosis (3, 4).  
73 NAFLD is highly prevalent in nearly all continents and is geographically heterogeneous  
74 in its prevalence from country to country. For example, it is reported that the highest  
75 rates were found in South America and the Middle East, followed by Asia, the USA,  
76 and Europe, whereas NAFLD is less common in Africa (5).

77  
78 Paralleling the worldwide increase of obesity and type 2 diabetes (6, 7), NAFLD has  
79 shown novel epidemic in both developed countries and developing countries in recent  
80 years. Knowing the temporal trends of NAFLD prevalence is of importance to better  
81 understand the disease burden of NAFLD and is indicative for its prevention. Previous  
82 studies were either focused on individual region or limited to a short period (3, 8, 9).  
83 Fortunately, the Global Burden of Disease study, which fills a gap where actual data on  
84 disease burden is sparse or unavailable, provides us an unprecedented opportunity to  
85 learn the epidemiology of NAFLD. In the current study, we used the data from GBD  
86 study to comprehensively describe the NAFLD prevalence and quantify its temporal  
87 trends between 1990 and 2017 at the global, regional, and national level. Our results  
88 are instrumental in raising the understanding of NAFLD and subsequently are  
89 informative in establishing the up-dated prevention strategies for NAFLD.

90

## 91 **Materials and methods**

92 The prevalence data of NAFLD, by sex, region, and age, were retrieved from the online  
93 Global Health Data Exchange (GHDx) query tool (10). Data from 5 socio-demographic  
94 index (SDI) regions (i.e., low, low-middle, middle, high-middle, and high), 21 GBD  
95 regions (e.g., East Asia), and a total of 195 countries and territories were available. The  
96 general methods for estimates in GBD have been detailed in the previous studies (11).  
97 NAFLD is an umbrella term for a range of liver conditions affecting people who drink  
98 little to no alcohol and identifies by ICD10 code K76.0. The prevalence of NAFLD was  
99 estimated by a systematic literature review in PubMed and then modelled by DisMod-  
100 MR 2.1 models (11). The following inclusion criteria were used: 1) sample size greater  
101 than 100; 2) representative of locale or area and sufficient methods; 3) does not exclude  
102 comorbidities; 4) NAFLD diagnosed by ultrasound (USS) or other imaging diagnostic.  
103 Any hospital and claims data which severely underestimated NAFLD prevalence were  
104 excluded. Data were outliered or excluded if we found they differed significantly when  
105 compared to regional, super-regional, and global rates. Studies using serum diagnostics  
106 or fatty liver indexes and scores to diagnose NAFLD were excluded as well. We also  
107 retrieved the data of the national human development index (HDI), a composite index  
108 measuring average achievement in three basic dimensions of human development—a  
109 long and healthy life, knowledge and a decent standard of living, from the World Bank  
110 ([www.worldbank.org](http://www.worldbank.org)).

112 The estimated annual percentage change (EAPC) was used to quantify the trends in the  
113 prevalence of NAFLD, stratified by sex, nation, and age, from 1990 to 2017. As  
114 described elsewhere, EAPC can be calculated by a regression line, which was fitted to  
115 the natural logarithm of the rates, i.e.,  $y = \alpha + \beta x + \varepsilon$ , where  $y = \ln(\text{rate})$ , and  $x =$   
116 calendar year (4). All statistical analyses were performed using the R program (Version  
117 3.3.3, R core team, Vienna, Austria). A *P*-value less than 0.05 was considered  
118 statistically significant.

## 120 **Results**

### 121 ***Prevalent case number and prevalence of NAFLD at the global level***

122 Worldwide, the prevalent case number of NAFLD increased from 391.2 million in 1990  
123 to 882.1 million in 2017, with the prevalence rate increased from 8.2% to 10.9% during  
124 this period (EAPC = 1.05, 95% CI 1.04, 1.07,  $P < 0.001$ ) (Table; Figures 1, 2). Males  
125 accounted for approximately 2/3 of the total cases. Whereas females experienced a  
126 greater increase in NAFLD prevalence than males (Table). All five SDI-regions were  
127 increased in both NAFLD prevalent case number and prevalence rate. The most  
128 pronounced increase was found in high-middle SDI region, in which the prevalence  
129 was the highest in 2017 (Table; Figures 1, 2). The increasing trends in both the NAFLD  
130 prevalent case number and prevalence rate were consistent in population with different  
131 ages. The younger people (aged 15-49 years) accounted for nearly 50% of the total  
132 cases and experienced the greatest increase in NAFLD prevalence between 1990 and  
133 2017 (EAPC = 1.25, 95% CI 1.22, 1.28  $P < 0.001$ ) (Table).

134

### 135 ***Prevalent case number and prevalence of NAFLD at the regional level***

136 A total of 21 GBD regions were included in this analysis. As shown in Figure 3A, the  
137 prevalent case number was highest in East Asia, followed by South Asia and North  
138 African and Middle East. In these three regions, the absolute case numbers were  
139 exceeded 0.1 billion in 2017. The highest NAFLD prevalence was observed in North  
140 African and Middle East (19.3%), followed by Oceania, Southeast Asia, and Central  
141 Latin America (Table). Between 1990 and 2017, all 21 regions were experienced a  
142 significant increase in NAFLD prevalence (Figure 3B). The greatest increase was  
143 detected in Western Europe, followed by Tropical Latin America and High-income  
144 North America (Table; Figure 3B).

145

### 146 ***Prevalent case number and prevalence of NAFLD at the national level***

147 Globally, the NAFLD prevalence varied from country to country, ranged from 5.2% in  
148 Rwanda to 24.9% in Qatar in 2017 (Figure 4A). The highest prevalence rates were  
149 observed in Qatar, Kuwait, Saudi Arabia, and Oman. The relatively lower prevalence  
150 was found in parts of Africa and Europe, including Uganda, Mozambique, France, and

1  
2  
3  
4 151 Denmark. China, India, Indonesia, Brazil, and the USA carried the heaviest burden of  
5  
6 152 NAFLD in terms of absolute number of cases. The case numbers were above 20 million  
7  
8 153 in these five countries. Between 1990 and 2017, nearly all countries or territories  
9  
10 154 experienced a significant increase in NAFLD prevalence (Figure 4B). The greatest  
11  
12 155 increase was observed in Oman (EAPC = 2.12, 95% CI 1.97, 2.26,  $P < 0.001$ ), followed  
13  
14 156 by Finland, Equatorial Guinea, and Nicaragua (Figure 4B; S-Table). Only one country  
15  
16 157 (i.e., Bulgaria) remained stable in NAFLD prevalence during the study period. The  
17  
18 158 increasing trend was consistent between both sexes and among all three age groups at  
19  
20 159 the national level (S-Table).

21  
22 160

23 161 We also tested the correlations of EAPCs of NAFLD prevalence with HDIs at the  
24  
25 162 national level. As shown in Figure 5, we found a significantly positive correlation  
26  
27 163 between these two indexes ( $\rho = 0.310$ ,  $P < 0.001$ ).

28  
29 164

## 30 31 165 **Discussion**

32  
33 166 Nonalcoholic fatty liver disease (NAFLD) and its histological subtype nonalcoholic  
34  
35 167 steatohepatitis (NASH) have emerged as the most common form of chronic liver  
36  
37 168 disease in most regions of the world. In the present study, we comprehensively  
38  
39 169 described the NAFLD prevalence along with its temporal trends over the last three  
40  
41 170 decades at the global, regional, and national level. In general, we found that NAFLD  
42  
43 171 prevalence was heterogeneous across the world, whereas approximately all countries  
44  
45 172 were shown a significant increasing trend over the last three decades. This increase was  
46  
47 173 consistent between both sexes and among populations with different ages. The highest  
48  
49 174 prevalence was mostly observed in countries located in North Africa and Middle East.  
50  
51 175 The most pronounced increase in prevalence was mainly found in countries located in  
52  
53 176 Western Europe.

54  
55 177

56 178 The striking increase in NAFLD prevalence has prompted investigators to explore its  
57  
58 179 risk factors. So far, the well-determined risk factors for NAFLD include obesity, type  
59  
60 180 2 diabetes, unhealthy diet (e.g., high intake of red and processed meat), and physical

181 inactivity (12-16). Among them, unhealthy lifestyle is deemed to be the most important  
182 contributor driving the epidemic of NAFLD (17). Key lifestyle parameters, such as an  
183 increased intake of glucose, fructose, and saturated fat, induce hepatic de-novo  
184 lipogenesis, subclinical inflammation in adipose tissue and liver, and insulin resistance  
185 in adipose tissue, the liver, and skeletal muscle. These lifestyle parameters are also  
186 accompanied by an increased risk of type 2 diabetes (18). Additionally, gut dysbiosis,  
187 majorly induced by an unhealthy diet, is believed to contribute to the accumulation of  
188 fat in the liver and the pathogenesis of NASH. In the presence of dysbiosis, bacteria-  
189 derived products can induce adipose tissue inflammation, hepatic steatosis, and hepatic  
190 inflammation (19). Genome-wide association and exome-sequencing studies have also  
191 provided robust evidence that genetic variability in *PNPLA3*, *TM6SF2*, *MBOAT7*,  
192 *GCKR*, *HSD17B13*, and other genes is associated with susceptibility to and progression  
193 of NAFLD (20). Although enormous efforts have been made and remarkable  
194 achievements have been obtained in understanding the etiology and pathology of  
195 NAFLD, there is still lack of efficient therapy to cure NAFLD (21). Primary prevention  
196 for the risk factors, such as adherence of healthy lifestyle and abstaining from  
197 overweight, is therefore the optimal approach to prevent NAFLD.

199 In our study, we found that approximately 0.9 billion people are afflicted by NAFLD  
200 in 2017. What clearly sets NAFLD apart from other common liver diseases is the sheer  
201 volume of patients. Unfortunately, we also observed an increasing trend in NAFLD  
202 prevalence around the world. In the context of increasing prevalence of obesity and  
203 diabetes, the NAFLD prevalence was anticipated to further increase in the near future,  
204 if no effective interventions are introduced (3). Consequently, the complications and  
205 sequelae of NAFLD might be on the rise as well. For example, the increasing  
206 prevalence of NAFLD is accompanying the increasing prevalence of other non-  
207 communicable diseases, including cardiovascular disease, obesity-associated and type  
208 2 diabetes-associated cancer, and advanced liver diseases such as hepatic cirrhosis and  
209 HCC (22, 23). As the clinical consequences of NAFLD grow, the economic  
210 consequences will also increase. A model on the population of US and of four European



211 countries (Germany, France, Italy and the UK) estimated the annual burden associated  
212 with all incident and prevalent NAFLD cases at US\$103 billion in the USA (\$1,613 per  
213 patient) and at € 35 billion in the four Europe countries (from € 354 to € 1,163 per  
214 patient) (24). In combination of ageing population, if the annual rate of increase in the  
215 costs related to NAFLD is assumed to parallel the annual growth in the prevalence of  
216 obesity, the expected 10-year burden of NAFLD could increase to an estimated \$1.005  
217 trillion in the USA and € 334 billion in the Europe (24). In addition, the NAFLD  
218 prevalence was also persistently increased in developing regions, e.g., the sub-Saharan  
219 Africa, in which the NAFLD was previously less diagnosed. This increase might be  
220 ascribed to the increasing availability of health care and the resultantly rising NAFLD  
221 detection rate, and more importantly, to the transitions in lifestyle. Rising awareness  
222 and urgent actions need to be taken in order to control the NAFLD pandemic worldwide.  
223 Specifically, 1) our governments should play a strong leadership role in reinforcing the  
224 importance of addressing the obesity problem and establishing more effective  
225 prevention strategies to combat it; 2) multifaceted solutions, involving government,  
226 industry, civil society, and public sector, are warranted; 3) funds should be allocated  
227 specifically to change the environment to one that promotes healthful eating and an  
228 active lifestyle, especially for children and adolescents; 4) interventions aimed at  
229 motivating behavioral changes, including setting-based (e.g., preschools, schools,  
230 workplaces, religious settings, and hospitals) health promotion and education programs,  
231 mass media campaigns, social marketing to improve the knowledge and skills of the  
232 community and individuals, and routine primary health care and counseling to facilitate  
233 obesity prevention and management, are needed (25).

234  
235 The limitations of our study should be noted. First, the data we used were derived from  
236 mathematical models rather than surveillance data. The differences in data processing  
237 approaches between GBD study and previous studies might contribute to the disparities  
238 in NAFLD prevalence in our study in contrast to that from previous meta-analyses (5,  
239 26). Second, NAFLD is a complex and heterogeneous disease. The scarcity in histology  
240 and stage data in GBD database dwarfed us to deeply describe the NAFLD disease

241 burden.

242

243 In summary, the prevalence of NAFLD is increasing worldwide, as well as being  
244 increasingly recognized in all parts of the world. The highest prevalence was observed  
245 in North Africa and Middle East, whereas the greatest increase was detected in Western  
246 Europe and North America. The dramatic and extensive increase in NAFLD prevalence  
247 alarmed us that NAFLD has emerged as a new public health concern worldwide and  
248 more efficient prevention strategies are urgently needed.

249

## 250 References

- 251 1. Younossi Z, Tacke F, Arrese M et al. Global Perspectives on Nonalcoholic Fatty Liver Disease and  
252 Nonalcoholic Steatohepatitis. *Hepatology*. 2019; 69(6):2672-2682.
- 253 2. Younossi Z, Anstee QM, Marietti M et al. Global burden of NAFLD and NASH: trends, predictions,  
254 risk factors and prevention. *Nat Rev Gastroenterol Hepatol*. 2018; 15(1):11-20.
- 255 3. Estes C, Razavi H, Loomba R et al. Modeling the epidemic of nonalcoholic fatty liver disease  
256 demonstrates an exponential increase in burden of disease. *Hepatology*. 2018; 67(1):123-133.
- 257 4. Liu Z, Jiang Y, Yuan H et al. The trends in incidence of primary liver cancer caused by specific  
258 etiologies: Results from the Global Burden of Disease Study 2016 and implications for liver cancer  
259 prevention. *J Hepatol*. 2019; 70(4):674-683.
- 260 5. Younossi ZM, Koenig AB, Abdelatif D et al. Global epidemiology of nonalcoholic fatty liver disease-  
261 Meta-analytic assessment of prevalence, incidence, and outcomes. *Hepatology*. 2016; 64(1):73-84.
- 262 6. Worldwide trends in diabetes since 1980: a pooled analysis of 751 population-based studies with  
263 4.4 million participants. *Lancet*. 2016; 387(10027):1513-1530.
- 264 7. Ng M, Fleming T, Robinson M et al. Global, regional, and national prevalence of overweight and  
265 obesity in children and adults during 1980-2013: a systematic analysis for the Global Burden of Disease  
266 Study 2013. *Lancet*. 2014; 384(9945):766-781.
- 267 8. Xanthakos SA, Jenkins TM, Kleiner DE et al. High Prevalence of Nonalcoholic Fatty Liver Disease in  
268 Adolescents Undergoing Bariatric Surgery. *Gastroenterology*. 2015; 149(3):623-634.e628.
- 269 9. Lazarus JV, Ekstedt M, Marchesini G et al. A cross-sectional study of the public health response to  
270 non-alcoholic fatty liver disease in Europe. *J Hepatol*. 2019.
- 271 10. Global Burden of Disease Collaborative Network. Global Burden of Disease Study 2017 (GBD 2017)  
272 Results. Seattle, United States: Institute for Health Metrics and Evaluation (IHME), 2018. Available from  
273 <http://ghdx.healthdata.org/gbd-results-tool>.
- 274 11. Global, regional, and national incidence, prevalence, and years lived with disability for 354  
275 diseases and injuries for 195 countries and territories, 1990-2017: a systematic analysis for the Global  
276 Burden of Disease Study 2017. *Lancet*. 2018; 392(10159):1789-1858.
- 277 12. Lu FB, Hu ED, Xu LM et al. The relationship between obesity and the severity of non-alcoholic fatty  
278 liver disease: systematic review and meta-analysis. *Expert Rev Gastroenterol Hepatol*. 2018; 12(5):491-  
279 502.



13. Ayonrinde OT, Oddy WH, Adams LA et al. Infant nutrition and maternal obesity influence the risk of non-alcoholic fatty liver disease in adolescents. *J Hepatol.* 2017; 67(3):568-576.
14. Cusi K, Sanyal AJ, Zhang S et al. Non-alcoholic fatty liver disease (NAFLD) prevalence and its metabolic associations in patients with type 1 diabetes and type 2 diabetes. *Diabetes Obes Metab.* 2017; 19(11):1630-1634.
15. Zelber-Sagi S, Ivancovsky-Wajcman D, Fliss Isakov N et al. High red and processed meat consumption is associated with non-alcoholic fatty liver disease and insulin resistance. *J Hepatol.* 2018; 68(6):1239-1246.
16. Mitchell T, McKinnon E, Ayonrinde O et al. Decreased Physical Working Capacity in Adolescents With Nonalcoholic Fatty Liver Disease Associates With Reduced Iron Availability. *Clin Gastroenterol Hepatol.* 2019.
17. Stefan N, Haring HU, Cusi K. Non-alcoholic fatty liver disease: causes, diagnosis, cardiometabolic consequences, and treatment strategies. *Lancet Diabetes Endocrinol.* 2019; 7(4):313-324.
18. Stefan N, Kantartzis K, Haring HU. Causes and metabolic consequences of Fatty liver. *Endocr Rev.* 2008; 29(7):939-960.
19. Marra F, Svegliati-Baroni G. Lipotoxicity and the gut-liver axis in NASH pathogenesis. *J Hepatol.* 2018; 68(2):280-295.
20. Eslam M, Valenti L, Romeo S. Genetics and epigenetics of NAFLD and NASH: Clinical impact. *J Hepatol.* 2018; 68(2):268-279.
21. Sanyal AJ. Past, present and future perspectives in nonalcoholic fatty liver disease. *Nat Rev Gastroenterol Hepatol.* 2019; 16(6):377-386.
22. Younossi ZM, Otgonsuren M, Henry L et al. Association of nonalcoholic fatty liver disease (NAFLD) with hepatocellular carcinoma (HCC) in the United States from 2004 to 2009. *Hepatology.* 2015; 62(6):1723-1730.
23. Global, regional, and national incidence, prevalence, and years lived with disability for 328 diseases and injuries for 195 countries, 1990-2016: a systematic analysis for the Global Burden of Disease Study 2016. *Lancet.* 2017; 390(10100):1211-1259.
24. Younossi ZM, Blissett D, Blissett R et al. The economic and clinical burden of nonalcoholic fatty liver disease in the United States and Europe. *Hepatology.* 2016; 64(5):1577-1586.
25. Zhang G, Cao F, Shi L et al. Contribution of high body mass index and alcohol use to liver cancer-related mortality: A study based on 195 countries or territories. *Dig Liver Dis.* 2019.
26. Zhou F, Zhou J, Wang W et al. Unexpected Rapid Increase in the Burden of NAFLD in China From 2008 to 2018: A Systematic Review and Meta-Analysis. *Hepatology.* 2019; 70(4):1119-1133.

**Table. The changing trends of number of prevalent cases and prevalence rate of NAFLD from 1990 to 2017.**

|                | 1990                          |                    | 2017                          |                   | 1990-2017*        |
|----------------|-------------------------------|--------------------|-------------------------------|-------------------|-------------------|
|                | No. of cases<br>(× 1 million) | Prevalence<br>(%)‡ | No. of cases<br>(× 1 million) | Prevalence<br>(%) | EAPC (95% CI)     |
| <b>Overall</b> | 391.2                         | 8.2                | 882.1                         | 10.9              | 1.05 (1.04, 1.07) |
| <b>Sex</b>     |                               |                    |                               |                   |                   |
| Male           | 236.4                         | 10.0               | 524.0                         | 13.2              | 1.00 (0.99, 1.02) |
| Female         | 154.8                         | 6.4                | 358.1                         | 8.7               | 1.12 (1.10, 1.13) |

| <b>Socio-demographical index</b> |       |      |       |      |                   |
|----------------------------------|-------|------|-------|------|-------------------|
| High                             | 76.2  | 6.7  | 137.4 | 9.0  | 1.14 (1.06, 1.21) |
| High-middle                      | 100.2 | 9.4  | 224.5 | 13.1 | 1.21 (1.17, 1.25) |
| Middle                           | 120.0 | 9.4  | 282.3 | 12.2 | 0.94 (0.92, 0.96) |
| Middle-low                       | 62.3  | 8.0  | 157.1 | 10.5 | 1.01 (1.00, 1.02) |
| Low                              | 30.4  | 6.5  | 76.2  | 7.9  | 0.74 (0.70, 0.79) |
| <b>Age (years)†</b>              |       |      |       |      |                   |
| 15-49                            | 241.5 | 8.8  | 489.1 | 12.5 | 1.25 (1.22, 1.28) |
| 50-69                            | 109.1 | 15.9 | 281.5 | 21.4 | 1.06 (1.04, 1.08) |
| ≥70                              | 40.7  | 20.0 | 111.4 | 25.7 | 0.93 (0.89, 0.96) |
| <b>GBD Region</b>                |       |      |       |      |                   |
| Andean Latin America             | 2.5   | 8.8  | 7.1   | 12.0 | 1.13 (1.10, 1.16) |
| Australasia                      | 1.5   | 6.4  | 3.1   | 8.6  | 1.16 (1.04, 1.28) |
| Caribbean                        | 2.8   | 9.2  | 5.8   | 11.7 | 1.03 (0.98, 1.07) |
| Central Asia                     | 3.8   | 6.7  | 7.4   | 8.5  | 0.91 (0.81, 1.01) |
| Central Europe                   | 9.5   | 6.7  | 13.1  | 8.0  | 0.70 (0.67, 0.73) |
| Central Latin America            | 12.7  | 10.5 | 36.5  | 14.4 | 1.17 (1.14, 1.21) |
| Central Sub-Saharan Africa       | 2.3   | 6.5  | 6.2   | 7.5  | 0.58 (0.50, 0.67) |
| East Asia                        | 111.8 | 9.6  | 242.8 | 12.6 | 0.88 (0.82, 0.95) |
| Eastern Europe                   | 18.4  | 7.0  | 23.7  | 8.4  | 0.73 (0.64, 0.82) |
| Eastern Sub-Saharan Africa       | 7.1   | 6.0  | 18.0  | 7.0  | 0.58 (0.55, 0.60) |
| High-income Asia Pacific         | 11.4  | 5.7  | 18.7  | 7.0  | 0.78 (0.75, 0.82) |
| High-income North America        | 23.1  | 7.2  | 44.0  | 9.6  | 1.17 (1.06, 1.29) |
| North Africa and Middle East     | 35.0  | 14.3 | 108.0 | 19.3 | 1.12 (1.10, 1.15) |
| Oceania                          | 0.6   | 12.8 | 1.6   | 16.3 | 0.90 (0.87, 0.92) |
| South Asia                       | 53.6  | 6.4  | 131.2 | 8.0  | 0.81 (0.78, 0.83) |
| Southeast Asia                   | 39.5  | 10.9 | 98.5  | 14.5 | 1.12 (1.08, 1.15) |
| Southern Latin America           | 3.1   | 6.5  | 6.3   | 8.6  | 1.05 (1.01, 1.08) |
| Southern Sub-Saharan Africa      | 3.7   | 9.3  | 8.1   | 11.4 | 0.73 (0.69, 0.77) |
| Tropical Latin America           | 9.8   | 8.0  | 26.7  | 11.1 | 1.17 (1.15, 1.19) |
| Western Europe                   | 30.9  | 6.5  | 52.1  | 8.9  | 1.17 (1.05, 1.29) |
| Western Sub-Saharan Africa       | 8.4   | 6.5  | 23.2  | 8.0  | 0.69 (0.63, 0.75) |

‡, the prevalence has been standardized by age.

†, crude prevalence rate for each age group.

\*, P values of all EAPCs were <0.001.

EAPC, estimated average percentage change; CI, confidence interval.

321

322

### 323 Figure legends

324 Figure 1. The changing trends of case number of nonalcoholic fatty liver disease from  
325 1990 to 2017, by sex and socio-demographical index.

326

327 Figure 2. The temporal trends of prevalence of nonalcoholic fatty liver disease from

1  
2  
3 328 1990 to 2017, by sex and socio-demographical index.  
4  
5 329

6 330 Figure 3. The case number (A) and prevalence trends (B) of nonalcoholic fatty liver  
7 331 disease at the GBD regional level. The error bar denotes 95% confidence interval.  
8  
9 332

10 333 Figure 4. The age-standardized prevalence rates (A) and its trends (B) of nonalcoholic  
11 334 fatty liver disease between 1990 and 2017 at the national level.  
12  
13 335

14 336 Figure 5. The association of prevalence trends of nonalcoholic fatty liver disease,  
15 337 quantified by estimated average percentage changes (EAPCs), with human  
16 338 development index at the national level. The correlation coefficient was derived from  
17 339 Pearson correlation test.  
18  
19 340

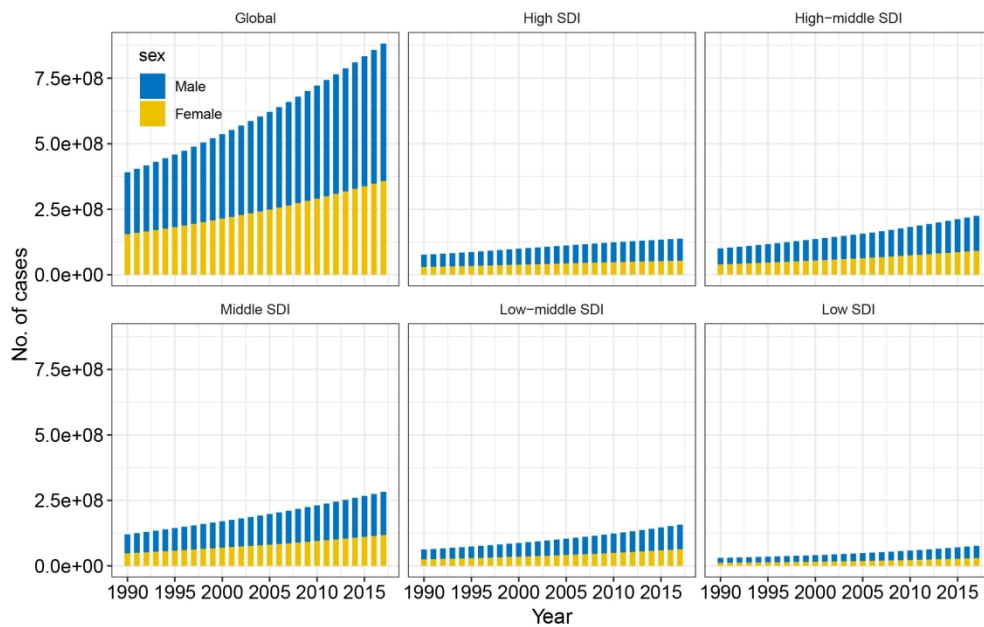

Figure 1

222x142mm (300 x 300 DPI)

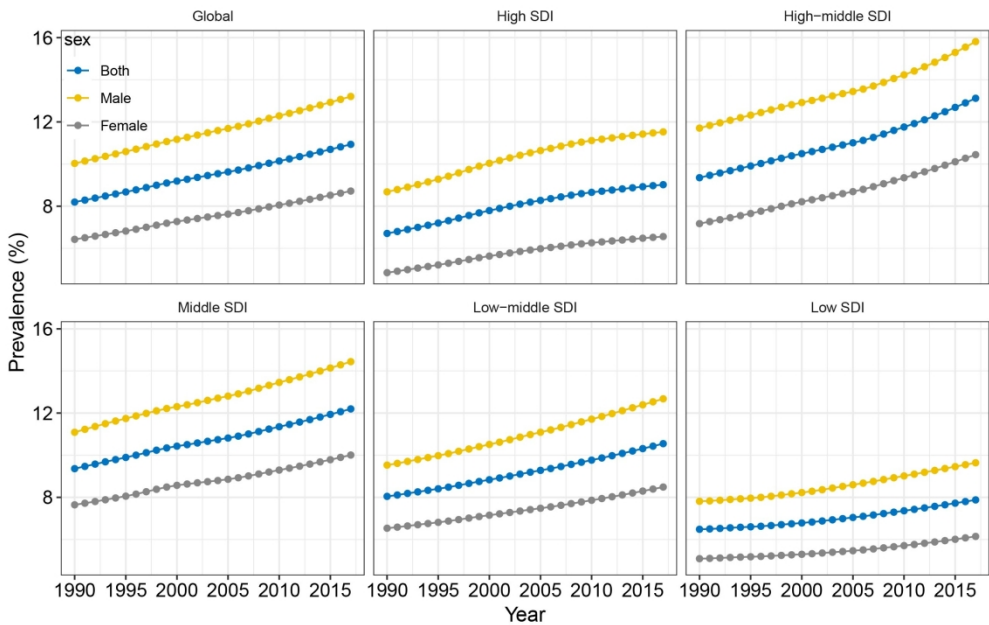

Figure 2

222x142mm (300 x 300 DPI)

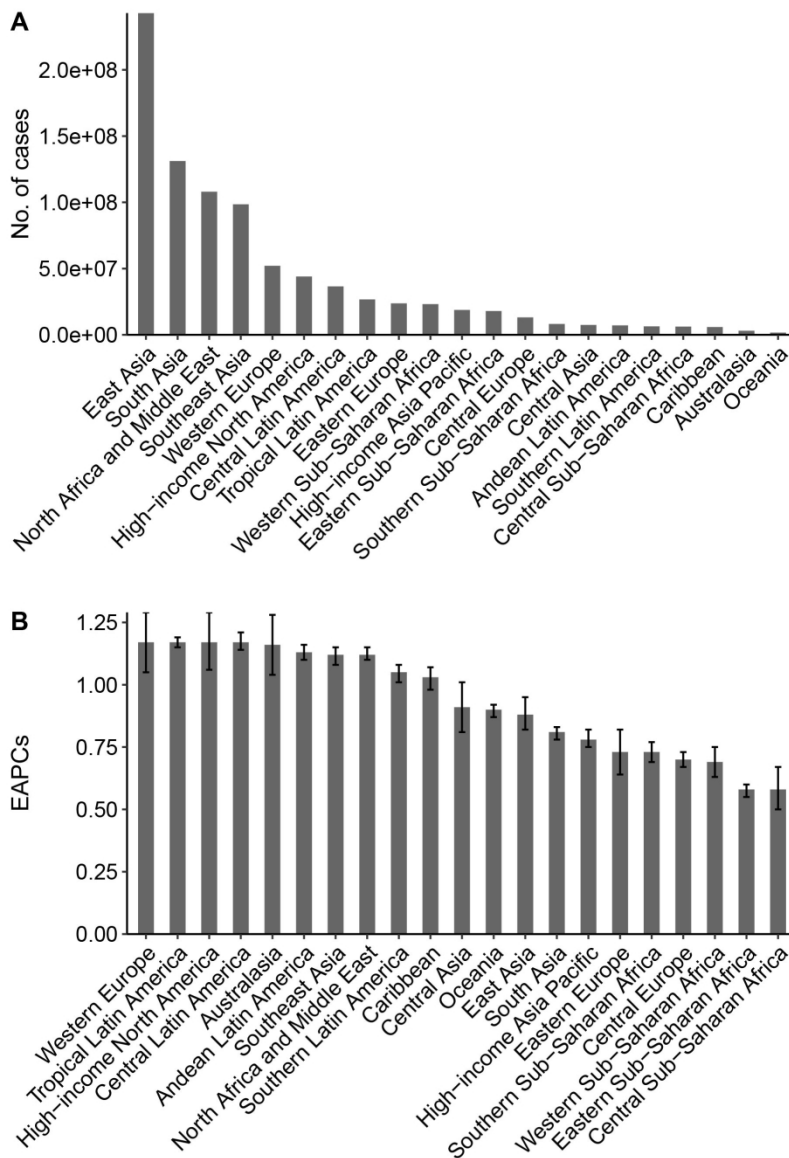

Figure 3

156x231mm (300 x 300 DPI)

1  
2  
3  
4  
5  
6  
7  
8  
9  
10  
11  
12  
13  
14  
15  
16  
17  
18  
19  
20  
21  
22  
23  
24  
25  
26  
27  
28  
29  
30  
31  
32  
33  
34  
35  
36  
37  
38  
39  
40  
41  
42  
43  
44  
45  
46  
47  
48  
49  
50  
51  
52  
53  
54  
55  
56  
57  
58  
59  
60

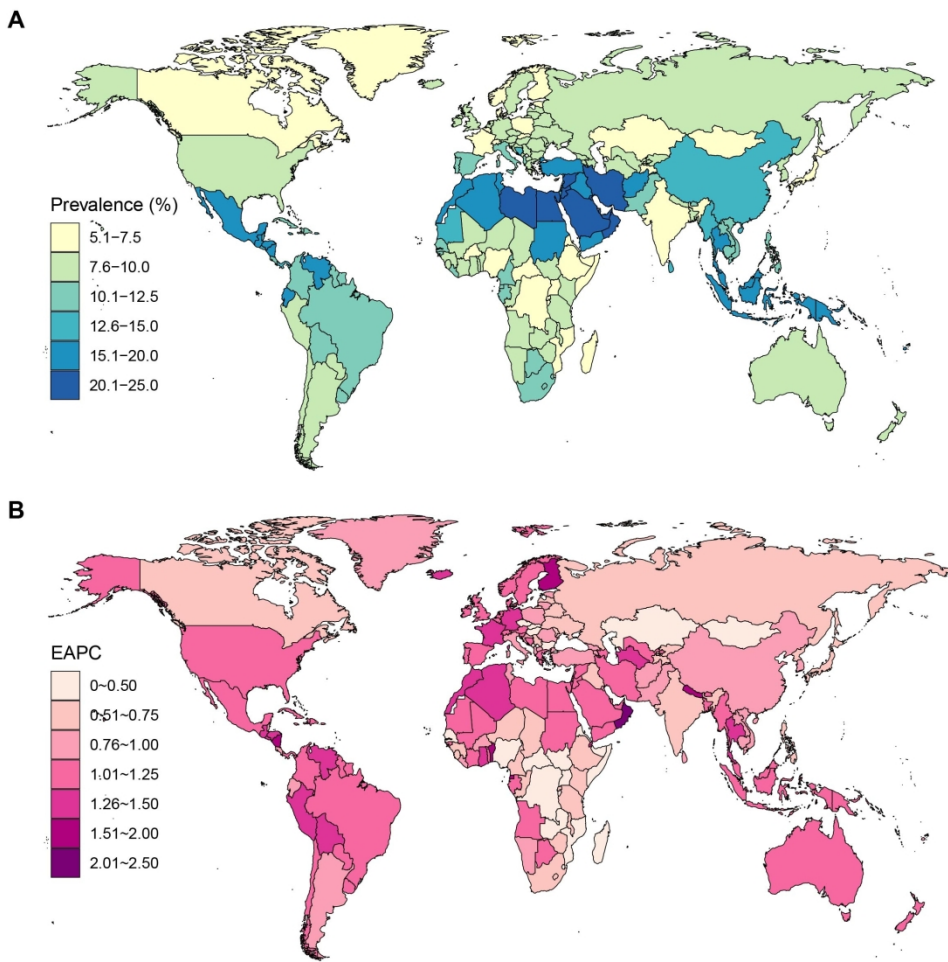

Figure 4

205x202mm (300 x 300 DPI)

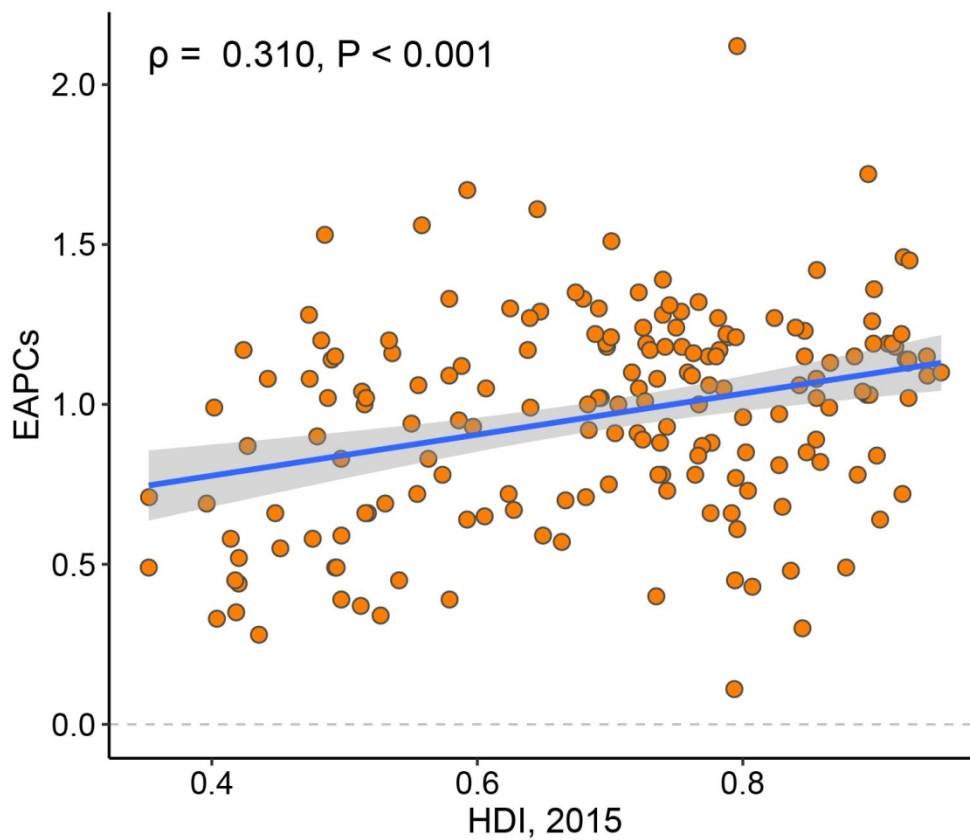

Figure 5

132x113mm (300 x 300 DPI)



1  
2 S-TABLE. The EAPCs of NAFLD prevalence at the national level, by sex and age.  
3

| 4 location                    | 5 sex     | 6 age               | 7 eapcs | 8 los | 9 ups | 10 pvalue |
|-------------------------------|-----------|---------------------|---------|-------|-------|-----------|
| 11 North Korea                | 12 Male   | 13 All Ages         | 1.44    | 1.35  | 1.53  | 0         |
| 14 North Korea                | 15 Male   | 16 15-49 years      | 0.78    | 0.74  | 0.81  | 0         |
| 17 North Korea                | 18 Male   | 19 50-69 years      | 0.65    | 0.62  | 0.68  | 0         |
| 20 North Korea                | 21 Male   | 22 70+ years        | 0.53    | 0.49  | 0.58  | 0         |
| 23 North Korea                | 24 Male   | 25 Age-standardized | 0.58    | 0.55  | 0.61  | 0         |
| 26 North Korea                | 27 Female | 28 All Ages         | 1.62    | 1.57  | 1.67  | 0         |
| 29 North Korea                | 30 Female | 31 15-49 years      | 1.11    | 1.09  | 1.13  | 0         |
| 32 North Korea                | 33 Female | 34 50-69 years      | 0.81    | 0.81  | 0.82  | 0         |
| 35 North Korea                | 36 Female | 37 70+ years        | 0.71    | 0.68  | 0.73  | 0         |
| 38 North Korea                | 39 Female | 40 Age-standardized | 0.75    | 0.73  | 0.77  | 0         |
| 41 North Korea                | 42 Both   | 43 All Ages         | 1.55    | 1.48  | 1.62  | 0         |
| 44 North Korea                | 45 Both   | 46 15-49 years      | 0.99    | 0.97  | 1.01  | 0         |
| 47 North Korea                | 48 Both   | 49 50-69 years      | 0.77    | 0.75  | 0.79  | 0         |
| 50 North Korea                | 51 Both   | 52 70+ years        | 0.68    | 0.64  | 0.71  | 0         |
| 53 Oman                       | 54 Both   | 55 Age-standardized | 2.12    | 1.97  | 2.26  | 0         |
| 56 Taiwan (Province of China) | 57 Male   | 58 All Ages         | 2.3     | 2.25  | 2.36  | 0         |
| 59 Taiwan (Province of China) | 60 Male   | 15-49 years         | 1.48    | 1.42  | 1.54  | 0         |
| Taiwan (Province of China)    | Male      | 50-69 years         | 1.12    | 1.08  | 1.15  | 0         |
| Taiwan (Province of China)    | Male      | 70+ years           | 0.82    | 0.78  | 0.86  | 0         |
| Taiwan (Province of China)    | Male      | Age-standardized    | 1.11    | 1.07  | 1.16  | 0         |
| Taiwan (Province of China)    | Female    | All Ages            | 2.96    | 2.85  | 3.06  | 0         |
| Taiwan (Province of China)    | Female    | 15-49 years         | 1.93    | 1.83  | 2.03  | 0         |
| Taiwan (Province of China)    | Female    | 50-69 years         | 1.48    | 1.42  | 1.55  | 0         |
| Taiwan (Province of China)    | Female    | 70+ years           | 1.24    | 1.15  | 1.32  | 0         |
| Taiwan (Province of China)    | Female    | Age-standardized    | 1.45    | 1.36  | 1.54  | 0         |
| Taiwan (Province of China)    | Both      | All Ages            | 2.54    | 2.47  | 2.62  | 0         |
| Taiwan (Province of China)    | Both      | 15-49 years         | 1.64    | 1.57  | 1.72  | 0         |
| Taiwan (Province of China)    | Both      | 50-69 years         | 1.21    | 1.15  | 1.27  | 0         |
| Taiwan (Province of China)    | Both      | 70+ years           | 0.91    | 0.85  | 0.97  | 0         |
| Finland                       | Both      | Age-standardized    | 1.72    | 1.56  | 1.87  | 0         |
| Armenia                       | Male      | All Ages            | 1.92    | 1.88  | 1.96  | 0         |
| Armenia                       | Male      | 15-49 years         | 1.05    | 0.95  | 1.16  | 0         |
| Armenia                       | Male      | 50-69 years         | 0.41    | 0.29  | 0.54  | 0         |
| Armenia                       | Male      | 70+ years           | 0.87    | 0.8   | 0.94  | 0         |
| Armenia                       | Male      | Age-standardized    | 0.8     | 0.72  | 0.88  | 0         |
| Armenia                       | Female    | All Ages            | 2.17    | 2.11  | 2.24  | 0         |
| Armenia                       | Female    | 15-49 years         | 1.1     | 1.03  | 1.17  | 0         |
| Armenia                       | Female    | 50-69 years         | 0.78    | 0.66  | 0.9   | 0         |
| Armenia                       | Female    | 70+ years           | 1.24    | 1.19  | 1.29  | 0         |
| Armenia                       | Female    | Age-standardized    | 1.04    | 0.96  | 1.12  | 0         |
| Armenia                       | Both      | All Ages            | 2.06    | 2     | 2.11  | 0         |
| Armenia                       | Both      | 15-49 years         | 1.08    | 0.99  | 1.17  | 0         |
| Armenia                       | Both      | 50-69 years         | 0.61    | 0.49  | 0.73  | 0         |
| Armenia                       | Both      | 70+ years           | 1.11    | 1.06  | 1.16  | 0         |
| Equatorial Guinea             | Both      | Age-standardized    | 1.67    | 1.55  | 1.8   | 0         |
| Andorra                       | Male      | All Ages            | 1.24    | 1.08  | 1.4   | 0         |
| Andorra                       | Male      | 15-49 years         | 1.12    | 0.96  | 1.29  | 0         |
| Andorra                       | Male      | 50-69 years         | 0.82    | 0.72  | 0.91  | 0         |
| Andorra                       | Male      | 70+ years           | 0.49    | 0.41  | 0.57  | 0         |
| Andorra                       | Male      | Age-standardized    | 0.84    | 0.74  | 0.94  | 0         |
| Andorra                       | Female    | All Ages            | 1.55    | 1.38  | 1.73  | 0         |
| Andorra                       | Female    | 15-49 years         | 1.3     | 1.14  | 1.46  | 0         |
| Andorra                       | Female    | 50-69 years         | 0.95    | 0.83  | 1.06  | 0         |
| Andorra                       | Female    | 70+ years           | 0.78    | 0.66  | 0.91  | 0         |

|    |                    |        |                  |      |      |      |   |
|----|--------------------|--------|------------------|------|------|------|---|
| 1  |                    |        |                  |      |      |      |   |
| 2  | Andorra            | Female | Age-standardized | 0.97 | 0.86 | 1.09 | 0 |
| 3  | Andorra            | Both   | All Ages         | 1.27 | 1.11 | 1.44 | 0 |
| 4  | Andorra            | Both   | 15-49 years      | 1.08 | 0.93 | 1.23 | 0 |
| 5  | Andorra            | Both   | 50-69 years      | 0.85 | 0.73 | 0.98 | 0 |
| 6  | Andorra            | Both   | 70+ years        | 0.52 | 0.42 | 0.61 | 0 |
| 7  | Nicaragua          | Both   | Age-standardized | 1.61 | 1.53 | 1.69 | 0 |
| 8  | Bhutan             | Male   | All Ages         | 2.19 | 2.14 | 2.24 | 0 |
| 9  | Bhutan             | Male   | 15-49 years      | 1.37 | 1.32 | 1.42 | 0 |
| 10 | Bhutan             | Male   | 50-69 years      | 0.92 | 0.9  | 0.95 | 0 |
| 11 | Bhutan             | Male   | 70+ years        | 0.92 | 0.9  | 0.94 | 0 |
| 12 | Bhutan             | Male   | Age-standardized | 0.98 | 0.94 | 1.01 | 0 |
| 13 | Bhutan             | Female | All Ages         | 2.1  | 2.06 | 2.15 | 0 |
| 14 | Bhutan             | Female | 15-49 years      | 1.3  | 1.24 | 1.36 | 0 |
| 15 | Bhutan             | Female | 50-69 years      | 1.05 | 1.01 | 1.08 | 0 |
| 16 | Bhutan             | Female | 70+ years        | 1.14 | 1.12 | 1.16 | 0 |
| 17 | Bhutan             | Female | Age-standardized | 1.09 | 1.06 | 1.11 | 0 |
| 18 | Bhutan             | Both   | All Ages         | 2.17 | 2.13 | 2.21 | 0 |
| 19 | Bhutan             | Both   | 15-49 years      | 1.38 | 1.33 | 1.42 | 0 |
| 20 | Bhutan             | Both   | 50-69 years      | 0.98 | 0.95 | 1    | 0 |
| 21 | Bhutan             | Both   | 70+ years        | 1    | 0.96 | 1.04 | 0 |
| 22 | Nepal              | Both   | Age-standardized | 1.56 | 1.4  | 1.72 | 0 |
| 23 | Dominican Republic | Male   | All Ages         | 2.1  | 2.02 | 2.18 | 0 |
| 24 | Dominican Republic | Male   | 15-49 years      | 1.34 | 1.27 | 1.42 | 0 |
| 25 | Dominican Republic | Male   | 50-69 years      | 0.92 | 0.84 | 1    | 0 |
| 26 | Dominican Republic | Male   | 70+ years        | 0.72 | 0.64 | 0.81 | 0 |
| 27 | Dominican Republic | Male   | Age-standardized | 0.97 | 0.89 | 1.05 | 0 |
| 28 | Dominican Republic | Female | All Ages         | 2.26 | 2.24 | 2.29 | 0 |
| 29 | Dominican Republic | Female | 15-49 years      | 1.46 | 1.4  | 1.51 | 0 |
| 30 | Dominican Republic | Female | 50-69 years      | 1.08 | 1.05 | 1.1  | 0 |
| 31 | Dominican Republic | Female | 70+ years        | 0.97 | 0.94 | 1    | 0 |
| 32 | Dominican Republic | Female | Age-standardized | 1.1  | 1.08 | 1.12 | 0 |
| 33 | Dominican Republic | Both   | All Ages         | 2.19 | 2.14 | 2.24 | 0 |
| 34 | Dominican Republic | Both   | 15-49 years      | 1.45 | 1.4  | 1.49 | 0 |
| 35 | Dominican Republic | Both   | 50-69 years      | 0.99 | 0.95 | 1.03 | 0 |
| 36 | Dominican Republic | Both   | 70+ years        | 0.81 | 0.76 | 0.86 | 0 |
| 37 | Benin              | Both   | Age-standardized | 1.53 | 1.45 | 1.61 | 0 |
| 38 | Samoa              | Male   | All Ages         | 1.32 | 1.26 | 1.38 | 0 |
| 39 | Samoa              | Male   | 15-49 years      | 1.18 | 1.07 | 1.28 | 0 |
| 40 | Samoa              | Male   | 50-69 years      | 0.67 | 0.63 | 0.71 | 0 |
| 41 | Samoa              | Male   | 70+ years        | 0.59 | 0.55 | 0.63 | 0 |
| 42 | Samoa              | Male   | Age-standardized | 0.78 | 0.74 | 0.82 | 0 |
| 43 | Samoa              | Female | All Ages         | 1.6  | 1.5  | 1.7  | 0 |
| 44 | Samoa              | Female | 15-49 years      | 1.37 | 1.23 | 1.51 | 0 |
| 45 | Samoa              | Female | 50-69 years      | 1.06 | 1    | 1.11 | 0 |
| 46 | Samoa              | Female | 70+ years        | 0.88 | 0.78 | 0.98 | 0 |
| 47 | Samoa              | Female | Age-standardized | 1.07 | 1.01 | 1.14 | 0 |
| 48 | Samoa              | Both   | All Ages         | 1.44 | 1.37 | 1.52 | 0 |
| 49 | Samoa              | Both   | 15-49 years      | 1.26 | 1.14 | 1.38 | 0 |
| 50 | Samoa              | Both   | 50-69 years      | 0.86 | 0.81 | 0.9  | 0 |
| 51 | Samoa              | Both   | 70+ years        | 0.74 | 0.67 | 0.81 | 0 |
| 52 | Maldives           | Both   | Age-standardized | 1.51 | 1.45 | 1.56 | 0 |
| 53 | Malaysia           | Male   | All Ages         | 2.21 | 2.16 | 2.27 | 0 |
| 54 | Malaysia           | Male   | 15-49 years      | 1.32 | 1.28 | 1.35 | 0 |
| 55 | Malaysia           | Male   | 50-69 years      | 1.13 | 1.09 | 1.18 | 0 |
| 56 | Malaysia           | Male   | 70+ years        | 0.94 | 0.9  | 0.97 | 0 |
| 57 | Malaysia           | Male   | Age-standardized | 1.16 | 1.12 | 1.2  | 0 |

|    |          |        |                  |      |      |      |   |
|----|----------|--------|------------------|------|------|------|---|
| 1  |          |        |                  |      |      |      |   |
| 2  | Malaysia | Female | All Ages         | 2.24 | 2.2  | 2.27 | 0 |
| 3  | Malaysia | Female | 15-49 years      | 1.34 | 1.29 | 1.39 | 0 |
| 4  | Malaysia | Female | 50-69 years      | 1.26 | 1.23 | 1.29 | 0 |
| 5  | Malaysia | Female | 70+ years        | 1.18 | 1.14 | 1.23 | 0 |
| 6  | Malaysia | Female | Age-standardized | 1.23 | 1.19 | 1.26 | 0 |
| 7  | Malaysia | Both   | All Ages         | 2.24 | 2.2  | 2.28 | 0 |
| 8  | Malaysia | Both   | 15-49 years      | 1.36 | 1.32 | 1.39 | 0 |
| 9  | Malaysia | Both   | 50-69 years      | 1.2  | 1.16 | 1.23 | 0 |
| 10 | Malaysia | Both   | 70+ years        | 1.08 | 1.04 | 1.12 | 0 |
| 11 | Iceland  | Both   | Age-standardized | 1.46 | 1.35 | 1.56 | 0 |
| 12 | Malta    | Male   | All Ages         | 2.12 | 1.95 | 2.29 | 0 |
| 13 | Malta    | Male   | 15-49 years      | 1.38 | 1.24 | 1.52 | 0 |
| 14 | Malta    | Male   | 50-69 years      | 1.26 | 1.12 | 1.4  | 0 |
| 15 | Malta    | Male   | 70+ years        | 1    | 0.85 | 1.15 | 0 |
| 16 | Malta    | Male   | Age-standardized | 1.29 | 1.13 | 1.46 | 0 |
| 17 | Malta    | Female | All Ages         | 2.46 | 2.28 | 2.64 | 0 |
| 18 | Malta    | Female | 15-49 years      | 1.5  | 1.37 | 1.64 | 0 |
| 19 | Malta    | Female | 50-69 years      | 1.59 | 1.43 | 1.74 | 0 |
| 20 | Malta    | Female | 70+ years        | 1.47 | 1.27 | 1.66 | 0 |
| 21 | Malta    | Female | Age-standardized | 1.52 | 1.34 | 1.69 | 0 |
| 22 | Malta    | Both   | All Ages         | 2.25 | 2.08 | 2.43 | 0 |
| 23 | Malta    | Both   | 15-49 years      | 1.45 | 1.31 | 1.59 | 0 |
| 24 | Malta    | Both   | 50-69 years      | 1.48 | 1.32 | 1.63 | 0 |
| 25 | Malta    | Both   | 70+ years        | 1.23 | 1.08 | 1.39 | 0 |
| 26 | Germany  | Both   | Age-standardized | 1.45 | 1.32 | 1.57 | 0 |
| 27 | Colombia | Male   | All Ages         | 2.17 | 2.14 | 2.21 | 0 |
| 28 | Colombia | Male   | 15-49 years      | 1.37 | 1.31 | 1.44 | 0 |
| 29 | Colombia | Male   | 50-69 years      | 1.05 | 1    | 1.1  | 0 |
| 30 | Colombia | Male   | 70+ years        | 0.85 | 0.79 | 0.9  | 0 |
| 31 | Colombia | Male   | Age-standardized | 1.12 | 1.07 | 1.17 | 0 |
| 32 | Colombia | Female | All Ages         | 2.53 | 2.48 | 2.57 | 0 |
| 33 | Colombia | Female | 15-49 years      | 1.6  | 1.5  | 1.69 | 0 |
| 34 | Colombia | Female | 50-69 years      | 1.24 | 1.19 | 1.29 | 0 |
| 35 | Colombia | Female | 70+ years        | 1.12 | 1.07 | 1.17 | 0 |
| 36 | Colombia | Female | Age-standardized | 1.29 | 1.23 | 1.34 | 0 |
| 37 | Colombia | Both   | All Ages         | 2.34 | 2.3  | 2.37 | 0 |
| 38 | Colombia | Both   | 15-49 years      | 1.48 | 1.41 | 1.56 | 0 |
| 39 | Colombia | Both   | 50-69 years      | 1.12 | 1.07 | 1.17 | 0 |
| 40 | Colombia | Both   | 70+ years        | 0.97 | 0.92 | 1.02 | 0 |
| 41 | Malta    | Both   | Age-standardized | 1.42 | 1.25 | 1.59 | 0 |
| 42 | Iceland  | Male   | All Ages         | 1.9  | 1.78 | 2.01 | 0 |
| 43 | Iceland  | Male   | 15-49 years      | 1.53 | 1.42 | 1.64 | 0 |
| 44 | Iceland  | Male   | 50-69 years      | 1.3  | 1.22 | 1.38 | 0 |
| 45 | Iceland  | Male   | 70+ years        | 1.06 | 0.97 | 1.15 | 0 |
| 46 | Iceland  | Male   | Age-standardized | 1.38 | 1.29 | 1.47 | 0 |
| 47 | Iceland  | Female | All Ages         | 2.08 | 1.96 | 2.2  | 0 |
| 48 | Iceland  | Female | 15-49 years      | 1.68 | 1.56 | 1.8  | 0 |
| 49 | Iceland  | Female | 50-69 years      | 1.46 | 1.36 | 1.55 | 0 |
| 50 | Iceland  | Female | 70+ years        | 1.4  | 1.24 | 1.57 | 0 |
| 51 | Iceland  | Female | Age-standardized | 1.55 | 1.43 | 1.67 | 0 |
| 52 | Iceland  | Both   | All Ages         | 1.96 | 1.84 | 2.08 | 0 |
| 53 | Iceland  | Both   | 15-49 years      | 1.58 | 1.46 | 1.7  | 0 |
| 54 | Iceland  | Both   | 50-69 years      | 1.39 | 1.29 | 1.48 | 0 |
| 55 | Iceland  | Both   | 70+ years        | 1.25 | 1.13 | 1.37 | 0 |
| 56 | Thailand | Both   | Age-standardized | 1.39 | 1.35 | 1.43 | 0 |
| 57 | Spain    | Male   | All Ages         | 1.73 | 1.51 | 1.94 | 0 |

|    |                                  |        |                  |      |      |      |   |
|----|----------------------------------|--------|------------------|------|------|------|---|
| 1  |                                  |        |                  |      |      |      |   |
| 2  | Spain                            | Male   | 15-49 years      | 1.69 | 1.53 | 1.86 | 0 |
| 3  | Spain                            | Male   | 50-69 years      | 1.11 | 0.97 | 1.24 | 0 |
| 4  | Spain                            | Male   | 70+ years        | 0.88 | 0.75 | 1.01 | 0 |
| 5  | Spain                            | Male   | Age-standardized | 1.16 | 1.02 | 1.29 | 0 |
| 6  | Spain                            | Female | All Ages         | 1.67 | 1.47 | 1.87 | 0 |
| 7  | Spain                            | Female | 15-49 years      | 1.6  | 1.45 | 1.75 | 0 |
| 8  | Spain                            | Female | 50-69 years      | 1    | 0.88 | 1.12 | 0 |
| 9  | Spain                            | Female | 70+ years        | 0.99 | 0.84 | 1.15 | 0 |
| 10 | Spain                            | Female | Age-standardized | 1.1  | 0.97 | 1.23 | 0 |
| 11 | Spain                            | Both   | All Ages         | 1.7  | 1.5  | 1.91 | 0 |
| 12 | Spain                            | Both   | 15-49 years      | 1.67 | 1.51 | 1.83 | 0 |
| 13 | Spain                            | Both   | 50-69 years      | 1.07 | 0.94 | 1.2  | 0 |
| 14 | Spain                            | Both   | 70+ years        | 0.95 | 0.81 | 1.1  | 0 |
| 15 | Spain                            | Both   | Age-standardized | 1.36 | 1.24 | 1.48 | 0 |
| 16 | Israel                           | Both   | All Ages         | 2.08 | 2.03 | 2.12 | 0 |
| 17 | China                            | Male   | 15-49 years      | 1.24 | 1.11 | 1.36 | 0 |
| 18 | China                            | Male   | 50-69 years      | 0.82 | 0.74 | 0.9  | 0 |
| 19 | China                            | Male   | 70+ years        | 0.67 | 0.61 | 0.74 | 0 |
| 20 | China                            | Male   | Age-standardized | 0.8  | 0.73 | 0.88 | 0 |
| 21 | China                            | Female | All Ages         | 2.44 | 2.39 | 2.49 | 0 |
| 22 | China                            | Female | 15-49 years      | 1.51 | 1.38 | 1.64 | 0 |
| 23 | China                            | Female | 50-69 years      | 1.07 | 1.01 | 1.13 | 0 |
| 24 | China                            | Female | 70+ years        | 0.9  | 0.85 | 0.95 | 0 |
| 25 | China                            | Female | Age-standardized | 1    | 0.94 | 1.05 | 0 |
| 26 | China                            | Both   | All Ages         | 2.22 | 2.17 | 2.27 | 0 |
| 27 | China                            | Both   | 15-49 years      | 1.34 | 1.21 | 1.47 | 0 |
| 28 | China                            | Both   | 50-69 years      | 0.91 | 0.84 | 0.98 | 0 |
| 29 | China                            | Both   | 70+ years        | 0.81 | 0.75 | 0.87 | 0 |
| 30 | China                            | Both   | Age-standardized | 1.35 | 1.26 | 1.43 | 0 |
| 31 | Bolivia                          | Both   | All Ages         | 1.98 | 1.94 | 2.02 | 0 |
| 32 | Brunei                           | Male   | 15-49 years      | 1.23 | 1.16 | 1.3  | 0 |
| 33 | Brunei                           | Male   | 50-69 years      | 1.08 | 1.02 | 1.14 | 0 |
| 34 | Brunei                           | Male   | 70+ years        | 0.86 | 0.82 | 0.9  | 0 |
| 35 | Brunei                           | Male   | Age-standardized | 1.09 | 1.03 | 1.16 | 0 |
| 36 | Brunei                           | Female | All Ages         | 2.6  | 2.51 | 2.69 | 0 |
| 37 | Brunei                           | Female | 15-49 years      | 1.57 | 1.45 | 1.69 | 0 |
| 38 | Brunei                           | Female | 50-69 years      | 1.32 | 1.22 | 1.42 | 0 |
| 39 | Brunei                           | Female | 70+ years        | 1.26 | 1.17 | 1.35 | 0 |
| 40 | Brunei                           | Female | Age-standardized | 1.36 | 1.25 | 1.47 | 0 |
| 41 | Brunei                           | Both   | All Ages         | 2.15 | 2.1  | 2.19 | 0 |
| 42 | Brunei                           | Both   | 15-49 years      | 1.3  | 1.25 | 1.35 | 0 |
| 43 | Brunei                           | Both   | 50-69 years      | 1.11 | 1.04 | 1.18 | 0 |
| 44 | Brunei                           | Both   | 70+ years        | 0.93 | 0.88 | 0.97 | 0 |
| 45 | Brunei                           | Both   | Age-standardized | 1.35 | 1.26 | 1.43 | 0 |
| 46 | Saint Vincent and the Grenadines | Both   | All Ages         | 2.39 | 2.34 | 2.44 | 0 |
| 47 | Morocco                          | Male   | 15-49 years      | 1.68 | 1.66 | 1.7  | 0 |
| 48 | Morocco                          | Male   | 50-69 years      | 1.26 | 1.24 | 1.29 | 0 |
| 49 | Morocco                          | Male   | 70+ years        | 1.12 | 1.1  | 1.14 | 0 |
| 50 | Morocco                          | Male   | Age-standardized | 1.31 | 1.29 | 1.33 | 0 |
| 51 | Morocco                          | Female | All Ages         | 2.38 | 2.34 | 2.43 | 0 |
| 52 | Morocco                          | Female | 15-49 years      | 1.67 | 1.63 | 1.71 | 0 |
| 53 | Morocco                          | Female | 50-69 years      | 1.23 | 1.21 | 1.25 | 0 |
| 54 | Morocco                          | Female | 70+ years        | 1.12 | 1.11 | 1.13 | 0 |
| 55 | Morocco                          | Female | Age-standardized | 1.27 | 1.24 | 1.29 | 0 |
| 56 | Morocco                          | Both   | All Ages         | 2.39 | 2.34 | 2.44 | 0 |
| 57 | Morocco                          | Both   | 15-49 years      | 1.68 | 1.64 | 1.71 | 0 |

|    |             |        |                  |      |      |      |   |
|----|-------------|--------|------------------|------|------|------|---|
| 1  |             |        |                  |      |      |      |   |
| 2  | Morocco     | Both   | 50-69 years      | 1.28 | 1.25 | 1.31 | 0 |
| 3  | Morocco     | Both   | 70+ years        | 1.06 | 1.04 | 1.07 | 0 |
| 4  | El Salvador | Both   | Age-standardized | 1.33 | 1.2  | 1.46 | 0 |
| 5  | Lithuania   | Male   | All Ages         | 1.54 | 1.47 | 1.61 | 0 |
| 6  | Lithuania   | Male   | 15-49 years      | 0.9  | 0.86 | 0.94 | 0 |
| 7  | Lithuania   | Male   | 50-69 years      | 0.36 | 0.33 | 0.4  | 0 |
| 8  | Lithuania   | Male   | 70+ years        | 0.6  | 0.52 | 0.67 | 0 |
| 9  | Lithuania   | Male   | Age-standardized | 0.61 | 0.57 | 0.65 | 0 |
| 10 | Lithuania   | Female | All Ages         | 2.3  | 2.19 | 2.41 | 0 |
| 11 | Lithuania   | Female | 15-49 years      | 1.16 | 1.1  | 1.22 | 0 |
| 12 | Lithuania   | Female | 50-69 years      | 1    | 0.93 | 1.07 | 0 |
| 13 | Lithuania   | Female | 70+ years        | 1.44 | 1.34 | 1.55 | 0 |
| 14 | Lithuania   | Female | Age-standardized | 1.13 | 1.06 | 1.2  | 0 |
| 15 | Lithuania   | Both   | All Ages         | 1.81 | 1.73 | 1.9  | 0 |
| 16 | Lithuania   | Both   | 15-49 years      | 1    | 0.95 | 1.04 | 0 |
| 17 | Lithuania   | Both   | 50-69 years      | 0.66 | 0.62 | 0.7  | 0 |
| 18 | Lithuania   | Both   | 70+ years        | 1.04 | 0.95 | 1.13 | 0 |
| 19 | Lithuania   | Both   | Age-standardized | 1.33 | 1.29 | 1.38 | 0 |
| 20 | Ghana       | Both   | Age-standardized | 1.33 | 1.29 | 1.38 | 0 |
| 21 | Botswana    | Male   | All Ages         | 2.4  | 2.33 | 2.46 | 0 |
| 22 | Botswana    | Male   | 15-49 years      | 1.65 | 1.56 | 1.74 | 0 |
| 23 | Botswana    | Male   | 50-69 years      | 1.12 | 1.08 | 1.16 | 0 |
| 24 | Botswana    | Male   | 70+ years        | 1.04 | 1.01 | 1.08 | 0 |
| 25 | Botswana    | Male   | Age-standardized | 1.21 | 1.18 | 1.25 | 0 |
| 26 | Botswana    | Female | All Ages         | 2.17 | 2.12 | 2.21 | 0 |
| 27 | Botswana    | Female | 15-49 years      | 1.43 | 1.36 | 1.51 | 0 |
| 28 | Botswana    | Female | 50-69 years      | 0.97 | 0.92 | 1.01 | 0 |
| 29 | Botswana    | Female | 70+ years        | 1.09 | 1.04 | 1.14 | 0 |
| 30 | Botswana    | Female | Age-standardized | 1.06 | 1.02 | 1.1  | 0 |
| 31 | Botswana    | Both   | All Ages         | 2.34 | 2.28 | 2.4  | 0 |
| 32 | Botswana    | Both   | 15-49 years      | 1.64 | 1.55 | 1.72 | 0 |
| 33 | Botswana    | Both   | 50-69 years      | 1.02 | 0.97 | 1.06 | 0 |
| 34 | Botswana    | Both   | 70+ years        | 1.04 | 0.96 | 1.13 | 0 |
| 35 | Botswana    | Both   | Age-standardized | 1.32 | 1.25 | 1.39 | 0 |
| 36 | Venezuela   | Both   | Age-standardized | 1.32 | 1.25 | 1.39 | 0 |
| 37 | Gabon       | Male   | All Ages         | 1.75 | 1.69 | 1.8  | 0 |
| 38 | Gabon       | Male   | 15-49 years      | 1.34 | 1.28 | 1.41 | 0 |
| 39 | Gabon       | Male   | 50-69 years      | 1.08 | 1.04 | 1.12 | 0 |
| 40 | Gabon       | Male   | 70+ years        | 1.02 | 0.98 | 1.07 | 0 |
| 41 | Gabon       | Male   | Age-standardized | 1.18 | 1.12 | 1.24 | 0 |
| 42 | Gabon       | Female | All Ages         | 1.66 | 1.59 | 1.73 | 0 |
| 43 | Gabon       | Female | 15-49 years      | 1.43 | 1.37 | 1.5  | 0 |
| 44 | Gabon       | Female | 50-69 years      | 1.08 | 1.03 | 1.13 | 0 |
| 45 | Gabon       | Female | 70+ years        | 1.29 | 1.22 | 1.37 | 0 |
| 46 | Gabon       | Female | Age-standardized | 1.22 | 1.15 | 1.28 | 0 |
| 47 | Gabon       | Both   | All Ages         | 1.69 | 1.64 | 1.75 | 0 |
| 48 | Gabon       | Both   | 15-49 years      | 1.32 | 1.26 | 1.38 | 0 |
| 49 | Gabon       | Both   | 50-69 years      | 1.2  | 1.14 | 1.26 | 0 |
| 50 | Gabon       | Both   | 70+ years        | 1.12 | 1.07 | 1.18 | 0 |
| 51 | Gabon       | Both   | Age-standardized | 1.31 | 1.23 | 1.4  | 0 |
| 52 | Algeria     | Both   | Age-standardized | 1.31 | 1.23 | 1.4  | 0 |
| 53 | Seychelles  | Male   | All Ages         | 2.15 | 2.09 | 2.22 | 0 |
| 54 | Seychelles  | Male   | 15-49 years      | 1.57 | 1.52 | 1.62 | 0 |
| 55 | Seychelles  | Male   | 50-69 years      | 0.96 | 0.92 | 1    | 0 |
| 56 | Seychelles  | Male   | 70+ years        | 0.81 | 0.78 | 0.83 | 0 |
| 57 | Seychelles  | Male   | Age-standardized | 1.05 | 1.01 | 1.09 | 0 |
| 58 | Seychelles  | Female | All Ages         | 2.26 | 2.19 | 2.32 | 0 |
| 59 | Seychelles  | Female | 15-49 years      | 1.9  | 1.82 | 1.99 | 0 |
| 60 | Seychelles  | Female | 50-69 years      | 1.22 | 1.19 | 1.24 | 0 |



|    |              |        |                  |       |       |      |       |
|----|--------------|--------|------------------|-------|-------|------|-------|
| 1  |              |        |                  |       |       |      |       |
| 2  | Seychelles   | Female | 70+ years        | 1.11  | 1.07  | 1.15 | 0     |
| 3  | Seychelles   | Female | Age-standardized | 1.25  | 1.22  | 1.28 | 0     |
| 4  | Seychelles   | Both   | All Ages         | 2.22  | 2.16  | 2.27 | 0     |
| 5  | Seychelles   | Both   | 15-49 years      | 1.74  | 1.68  | 1.8  | 0     |
| 6  | Seychelles   | Both   | 50-69 years      | 1.11  | 1.08  | 1.14 | 0     |
| 7  | Seychelles   | Both   | 70+ years        | 0.99  | 0.95  | 1.02 | 0     |
| 8  | Honduras     | Both   | Age-standardized | 1.3   | 1.21  | 1.38 | 0     |
| 9  | Montenegro   | Male   | All Ages         | 1.12  | 1.08  | 1.15 | 0     |
| 10 | Montenegro   | Male   | 15-49 years      | 0.57  | 0.49  | 0.65 | 0     |
| 11 | Montenegro   | Male   | 50-69 years      | -0.05 | -0.15 | 0.04 | 0.239 |
| 12 | Montenegro   | Male   | 70+ years        | 0.29  | 0.25  | 0.32 | 0     |
| 13 | Montenegro   | Male   | Age-standardized | 0.25  | 0.16  | 0.33 | 0     |
| 14 | Montenegro   | Female | All Ages         | 1.62  | 1.54  | 1.7  | 0     |
| 15 | Montenegro   | Female | 15-49 years      | 0.79  | 0.71  | 0.88 | 0     |
| 16 | Montenegro   | Female | 50-69 years      | 0.62  | 0.55  | 0.7  | 0     |
| 17 | Montenegro   | Female | 70+ years        | 0.88  | 0.75  | 1    | 0     |
| 18 | Montenegro   | Female | Age-standardized | 0.66  | 0.55  | 0.76 | 0     |
| 19 | Montenegro   | Both   | All Ages         | 1.32  | 1.26  | 1.37 | 0     |
| 20 | Montenegro   | Both   | 15-49 years      | 0.63  | 0.55  | 0.72 | 0     |
| 21 | Montenegro   | Both   | 50-69 years      | 0.26  | 0.18  | 0.34 | 0     |
| 22 | Montenegro   | Both   | 70+ years        | 0.64  | 0.56  | 0.71 | 0     |
| 23 | Turkmenistan | Both   | Age-standardized | 1.3   | 1.23  | 1.37 | 0     |
| 24 | Albania      | Male   | All Ages         | 2.39  | 2.32  | 2.45 | 0     |
| 25 | Albania      | Male   | 15-49 years      | 0.78  | 0.75  | 0.81 | 0     |
| 26 | Albania      | Male   | 50-69 years      | 0.47  | 0.4   | 0.54 | 0     |
| 27 | Albania      | Male   | 70+ years        | 0.64  | 0.59  | 0.69 | 0     |
| 28 | Albania      | Male   | Age-standardized | 0.6   | 0.58  | 0.62 | 0     |
| 29 | Albania      | Female | All Ages         | 2.86  | 2.75  | 2.98 | 0     |
| 30 | Albania      | Female | 15-49 years      | 1.21  | 1.15  | 1.27 | 0     |
| 31 | Albania      | Female | 50-69 years      | 1     | 0.97  | 1.03 | 0     |
| 32 | Albania      | Female | 70+ years        | 1.34  | 1.29  | 1.4  | 0     |
| 33 | Albania      | Female | Age-standardized | 1.01  | 0.95  | 1.06 | 0     |
| 34 | Albania      | Both   | All Ages         | 2.59  | 2.5   | 2.67 | 0     |
| 35 | Albania      | Both   | 15-49 years      | 0.96  | 0.92  | 0.99 | 0     |
| 36 | Albania      | Both   | 50-69 years      | 0.67  | 0.64  | 0.71 | 0     |
| 37 | Albania      | Both   | 70+ years        | 1.09  | 1.03  | 1.15 | 0     |
| 38 | Morocco      | Both   | Age-standardized | 1.29  | 1.27  | 1.32 | 0     |
| 39 | Austria      | Male   | All Ages         | 1.41  | 1.3   | 1.52 | 0     |
| 40 | Austria      | Male   | 15-49 years      | 1.12  | 0.97  | 1.28 | 0     |
| 41 | Austria      | Male   | 50-69 years      | 0.92  | 0.81  | 1.04 | 0     |
| 42 | Austria      | Male   | 70+ years        | 0.66  | 0.57  | 0.76 | 0     |
| 43 | Austria      | Male   | Age-standardized | 0.94  | 0.83  | 1.05 | 0     |
| 44 | Austria      | Female | All Ages         | 1.4   | 1.29  | 1.52 | 0     |
| 45 | Austria      | Female | 15-49 years      | 1.29  | 1.12  | 1.45 | 0     |
| 46 | Austria      | Female | 50-69 years      | 1.07  | 0.96  | 1.19 | 0     |
| 47 | Austria      | Female | 70+ years        | 0.84  | 0.73  | 0.95 | 0     |
| 48 | Austria      | Female | Age-standardized | 1.09  | 0.97  | 1.22 | 0     |
| 49 | Austria      | Both   | All Ages         | 1.43  | 1.32  | 1.54 | 0     |
| 50 | Austria      | Both   | 15-49 years      | 1.16  | 1     | 1.31 | 0     |
| 51 | Austria      | Both   | 50-69 years      | 1.04  | 0.91  | 1.17 | 0     |
| 52 | Austria      | Both   | 70+ years        | 0.98  | 0.88  | 1.07 | 0     |
| 53 | Grenada      | Both   | Age-standardized | 1.29  | 1.22  | 1.37 | 0     |
| 54 | Maldives     | Male   | All Ages         | 3.42  | 3.27  | 3.57 | 0     |
| 55 | Maldives     | Male   | 15-49 years      | 2     | 1.88  | 2.11 | 0     |
| 56 | Maldives     | Male   | 50-69 years      | 1.35  | 1.29  | 1.4  | 0     |
| 57 | Maldives     | Male   | 70+ years        | 1.06  | 1.02  | 1.11 | 0     |

|    |           |        |                  |      |       |      |       |
|----|-----------|--------|------------------|------|-------|------|-------|
| 1  |           |        |                  |      |       |      |       |
| 2  | Maldives  | Male   | Age-standardized | 1.41 | 1.36  | 1.46 | 0     |
| 3  | Maldives  | Female | All Ages         | 3.71 | 3.58  | 3.83 | 0     |
| 4  | Maldives  | Female | 15-49 years      | 2.22 | 2.07  | 2.37 | 0     |
| 5  | Maldives  | Female | 50-69 years      | 1.61 | 1.57  | 1.64 | 0     |
| 6  | Maldives  | Female | 70+ years        | 1.37 | 1.33  | 1.41 | 0     |
| 7  | Maldives  | Female | Age-standardized | 1.59 | 1.53  | 1.65 | 0     |
| 8  | Maldives  | Both   | All Ages         | 3.61 | 3.46  | 3.77 | 0     |
| 9  | Maldives  | Both   | 15-49 years      | 2.21 | 2.05  | 2.38 | 0     |
| 10 | Maldives  | Both   | 50-69 years      | 1.42 | 1.38  | 1.45 | 0     |
| 11 | Maldives  | Both   | 70+ years        | 1.07 | 1.04  | 1.1  | 0     |
| 12 | Peru      | Both   | Age-standardized | 1.28 | 1.24  | 1.32 | 0     |
| 13 | Belarus   | Male   | All Ages         | 1.1  | 1.04  | 1.15 | 0     |
| 14 | Belarus   | Male   | 15-49 years      | 0.74 | 0.59  | 0.89 | 0     |
| 15 | Belarus   | Male   | 50-69 years      | 0.08 | -0.05 | 0.21 | 0.235 |
| 16 | Belarus   | Male   | 70+ years        | 0.32 | 0.3   | 0.35 | 0     |
| 17 | Belarus   | Male   | Age-standardized | 0.42 | 0.31  | 0.52 | 0     |
| 18 | Belarus   | Female | All Ages         | 1.5  | 1.42  | 1.58 | 0     |
| 19 | Belarus   | Female | 15-49 years      | 0.99 | 0.87  | 1.12 | 0     |
| 20 | Belarus   | Female | 50-69 years      | 0.46 | 0.33  | 0.59 | 0     |
| 21 | Belarus   | Female | 70+ years        | 1.06 | 0.95  | 1.17 | 0     |
| 22 | Belarus   | Female | Age-standardized | 0.83 | 0.72  | 0.94 | 0     |
| 23 | Belarus   | Both   | All Ages         | 1.25 | 1.19  | 1.31 | 0     |
| 24 | Belarus   | Both   | 15-49 years      | 0.82 | 0.68  | 0.96 | 0     |
| 25 | Belarus   | Both   | 50-69 years      | 0.28 | 0.15  | 0.41 | 0     |
| 26 | Belarus   | Both   | 70+ years        | 0.8  | 0.75  | 0.84 | 0     |
| 27 | Djibouti  | Both   | Age-standardized | 1.28 | 1.23  | 1.33 | 0     |
| 28 | Palestine | Male   | All Ages         | 1.84 | 1.8   | 1.88 | 0     |
| 29 | Palestine | Male   | 15-49 years      | 1.18 | 1.06  | 1.3  | 0     |
| 30 | Palestine | Male   | 50-69 years      | 0.82 | 0.74  | 0.9  | 0     |
| 31 | Palestine | Male   | 70+ years        | 0.72 | 0.6   | 0.84 | 0     |
| 32 | Palestine | Male   | Age-standardized | 0.87 | 0.77  | 0.97 | 0     |
| 33 | Palestine | Female | All Ages         | 1.61 | 1.55  | 1.68 | 0     |
| 34 | Palestine | Female | 15-49 years      | 1.13 | 1.04  | 1.23 | 0     |
| 35 | Palestine | Female | 50-69 years      | 0.87 | 0.76  | 0.98 | 0     |
| 36 | Palestine | Female | 70+ years        | 0.82 | 0.68  | 0.96 | 0     |
| 37 | Palestine | Female | Age-standardized | 0.9  | 0.78  | 1.01 | 0     |
| 38 | Palestine | Both   | All Ages         | 1.76 | 1.72  | 1.8  | 0     |
| 39 | Palestine | Both   | 15-49 years      | 1.16 | 1.05  | 1.28 | 0     |
| 40 | Palestine | Both   | 50-69 years      | 0.99 | 0.89  | 1.08 | 0     |
| 41 | Palestine | Both   | 70+ years        | 0.68 | 0.58  | 0.79 | 0     |
| 42 | Bahrain   | Both   | Age-standardized | 1.27 | 1.23  | 1.31 | 0     |
| 43 | Australia | Male   | All Ages         | 1.54 | 1.4   | 1.69 | 0     |
| 44 | Australia | Male   | 15-49 years      | 1.26 | 1.11  | 1.42 | 0     |
| 45 | Australia | Male   | 50-69 years      | 1.08 | 0.97  | 1.19 | 0     |
| 46 | Australia | Male   | 70+ years        | 0.73 | 0.63  | 0.82 | 0     |
| 47 | Australia | Male   | Age-standardized | 1.14 | 1.01  | 1.27 | 0     |
| 48 | Australia | Female | All Ages         | 1.63 | 1.5   | 1.76 | 0     |
| 49 | Australia | Female | 15-49 years      | 1.38 | 1.27  | 1.49 | 0     |
| 50 | Australia | Female | 50-69 years      | 1.03 | 0.93  | 1.13 | 0     |
| 51 | Australia | Female | 70+ years        | 0.85 | 0.72  | 0.97 | 0     |
| 52 | Australia | Female | Age-standardized | 1.17 | 1.06  | 1.27 | 0     |
| 53 | Australia | Both   | All Ages         | 1.57 | 1.43  | 1.71 | 0     |
| 54 | Australia | Both   | 15-49 years      | 1.28 | 1.15  | 1.42 | 0     |
| 55 | Australia | Both   | 50-69 years      | 1.04 | 0.93  | 1.15 | 0     |
| 56 | Australia | Both   | 70+ years        | 0.87 | 0.76  | 0.99 | 0     |
| 57 | Guatemala | Both   | Age-standardized | 1.27 | 1.23  | 1.31 | 0     |

|    |                          |        |                  |      |      |      |       |
|----|--------------------------|--------|------------------|------|------|------|-------|
| 1  |                          |        |                  |      |      |      |       |
| 2  | Moldova                  | Male   | All Ages         | 1.51 | 1.41 | 1.61 | 0     |
| 3  | Moldova                  | Male   | 15-49 years      | 0.84 | 0.66 | 1.03 | 0     |
| 4  | Moldova                  | Male   | 50-69 years      | 0.19 | 0.06 | 0.32 | 0.006 |
| 5  | Moldova                  | Male   | 70+ years        | 0.33 | 0.25 | 0.41 | 0     |
| 6  | Moldova                  | Male   | Age-standardized | 0.52 | 0.38 | 0.65 | 0     |
| 7  | Moldova                  | Female | All Ages         | 2.03 | 1.9  | 2.15 | 0     |
| 8  | Moldova                  | Female | 15-49 years      | 1.06 | 0.91 | 1.21 | 0     |
| 9  | Moldova                  | Female | 50-69 years      | 0.72 | 0.59 | 0.86 | 0     |
| 10 | Moldova                  | Female | 70+ years        | 1.12 | 0.98 | 1.27 | 0     |
| 11 | Moldova                  | Female | Age-standardized | 1    | 0.86 | 1.13 | 0     |
| 12 | Moldova                  | Both   | All Ages         | 1.71 | 1.6  | 1.83 | 0     |
| 13 | Moldova                  | Both   | 15-49 years      | 0.96 | 0.79 | 1.14 | 0     |
| 14 | Moldova                  | Both   | 50-69 years      | 0.44 | 0.31 | 0.57 | 0     |
| 15 | Moldova                  | Both   | 70+ years        | 0.74 | 0.63 | 0.85 | 0     |
| 16 | Moldova                  | Both   | Age-standardized | 1.27 | 1.21 | 1.33 | 0     |
| 17 | Mauritius                | Both   | All Ages         | 2.15 | 2.12 | 2.19 | 0     |
| 18 | Costa Rica               | Male   | 15-49 years      | 1.19 | 1.14 | 1.24 | 0     |
| 19 | Costa Rica               | Male   | 50-69 years      | 0.83 | 0.77 | 0.88 | 0     |
| 20 | Costa Rica               | Male   | 70+ years        | 0.58 | 0.53 | 0.63 | 0     |
| 21 | Costa Rica               | Male   | Age-standardized | 0.91 | 0.86 | 0.96 | 0     |
| 22 | Costa Rica               | Female | All Ages         | 2.28 | 2.24 | 2.32 | 0     |
| 23 | Costa Rica               | Female | 15-49 years      | 1.17 | 1.14 | 1.21 | 0     |
| 24 | Costa Rica               | Female | 50-69 years      | 0.85 | 0.83 | 0.87 | 0     |
| 25 | Costa Rica               | Female | 70+ years        | 0.75 | 0.71 | 0.8  | 0     |
| 26 | Costa Rica               | Female | Age-standardized | 0.92 | 0.89 | 0.96 | 0     |
| 27 | Costa Rica               | Both   | All Ages         | 2.17 | 2.13 | 2.2  | 0     |
| 28 | Costa Rica               | Both   | 15-49 years      | 1.15 | 1.1  | 1.2  | 0     |
| 29 | Costa Rica               | Both   | 50-69 years      | 0.79 | 0.75 | 0.84 | 0     |
| 30 | Costa Rica               | Both   | 70+ years        | 0.62 | 0.58 | 0.67 | 0     |
| 31 | Costa Rica               | Both   | Age-standardized | 1.26 | 1.14 | 1.37 | 0     |
| 32 | France                   | Both   | All Ages         | 1.64 | 1.61 | 1.67 | 0     |
| 33 | Low-middle SDI           | Male   | 15-49 years      | 1.25 | 1.24 | 1.25 | 0     |
| 34 | Low-middle SDI           | Male   | 50-69 years      | 1.08 | 1.07 | 1.1  | 0     |
| 35 | Low-middle SDI           | Male   | 70+ years        | 0.8  | 0.76 | 0.83 | 0     |
| 36 | Low-middle SDI           | Male   | Age-standardized | 1.07 | 1.06 | 1.08 | 0     |
| 37 | Low-middle SDI           | Female | All Ages         | 1.64 | 1.61 | 1.67 | 0     |
| 38 | Low-middle SDI           | Female | 15-49 years      | 1.15 | 1.14 | 1.17 | 0     |
| 39 | Low-middle SDI           | Female | 50-69 years      | 0.97 | 0.96 | 0.99 | 0     |
| 40 | Low-middle SDI           | Female | 70+ years        | 0.89 | 0.87 | 0.92 | 0     |
| 41 | Low-middle SDI           | Female | Age-standardized | 0.97 | 0.95 | 0.98 | 0     |
| 42 | Low-middle SDI           | Both   | All Ages         | 1.63 | 1.6  | 1.66 | 0     |
| 43 | Low-middle SDI           | Both   | 15-49 years      | 1.2  | 1.19 | 1.21 | 0     |
| 44 | Low-middle SDI           | Both   | 50-69 years      | 1.01 | 0.99 | 1.02 | 0     |
| 45 | Low-middle SDI           | Both   | 70+ years        | 0.8  | 0.78 | 0.82 | 0     |
| 46 | Low-middle SDI           | Both   | Age-standardized | 1.01 | 1    | 1.02 | 0     |
| 47 | Northern Mariana Islands | Male   | All Ages         | 1.44 | 1.35 | 1.54 | 0     |
| 48 | Northern Mariana Islands | Male   | 15-49 years      | 0.64 | 0.46 | 0.82 | 0     |
| 49 | Northern Mariana Islands | Male   | 50-69 years      | 0.49 | 0.43 | 0.56 | 0     |
| 50 | Northern Mariana Islands | Male   | 70+ years        | 0.31 | 0.27 | 0.36 | 0     |
| 51 | Northern Mariana Islands | Male   | Age-standardized | 0.5  | 0.43 | 0.56 | 0     |
| 52 | Northern Mariana Islands | Female | All Ages         | 2.01 | 1.94 | 2.07 | 0     |
| 53 | Northern Mariana Islands | Female | 15-49 years      | 1.04 | 0.81 | 1.28 | 0     |
| 54 | Northern Mariana Islands | Female | 50-69 years      | 0.67 | 0.63 | 0.71 | 0     |
| 55 | Northern Mariana Islands | Female | 70+ years        | 0.44 | 0.39 | 0.49 | 0     |
| 56 | Northern Mariana Islands | Female | Age-standardized | 0.65 | 0.6  | 0.7  | 0     |
| 57 | Northern Mariana Islands | Both   | All Ages         | 1.69 | 1.6  | 1.77 | 0     |



|    |                          |        |                  |      |      |      |   |
|----|--------------------------|--------|------------------|------|------|------|---|
| 1  |                          |        |                  |      |      |      |   |
| 2  | Northern Mariana Islands | Both   | 15-49 years      | 0.83 | 0.65 | 1.01 | 0 |
| 3  | Northern Mariana Islands | Both   | 50-69 years      | 0.5  | 0.45 | 0.54 | 0 |
| 4  | Northern Mariana Islands | Both   | 70+ years        | 0.35 | 0.29 | 0.4  | 0 |
| 5  | Bosnia and Herzegovina   | Both   | Age-standardized | 1.24 | 1.12 | 1.37 | 0 |
| 6  | Poland                   | Male   | All Ages         | 1.68 | 1.65 | 1.71 | 0 |
| 7  | Poland                   | Male   | 15-49 years      | 0.99 | 0.88 | 1.1  | 0 |
| 8  | Poland                   | Male   | 50-69 years      | 0.39 | 0.3  | 0.48 | 0 |
| 9  | Poland                   | Male   | 70+ years        | 0.69 | 0.61 | 0.77 | 0 |
| 10 | Poland                   | Male   | Age-standardized | 0.73 | 0.7  | 0.76 | 0 |
| 11 | Poland                   | Female | All Ages         | 2.04 | 2.01 | 2.08 | 0 |
| 12 | Poland                   | Female | 15-49 years      | 1.11 | 1.02 | 1.2  | 0 |
| 13 | Poland                   | Female | 50-69 years      | 0.88 | 0.72 | 1.04 | 0 |
| 14 | Poland                   | Female | 70+ years        | 1.14 | 1.1  | 1.17 | 0 |
| 15 | Poland                   | Female | Age-standardized | 1.07 | 1.02 | 1.11 | 0 |
| 16 | Poland                   | Both   | All Ages         | 1.82 | 1.79 | 1.85 | 0 |
| 17 | Poland                   | Both   | 15-49 years      | 1.04 | 0.94 | 1.14 | 0 |
| 18 | Poland                   | Both   | 50-69 years      | 0.63 | 0.52 | 0.74 | 0 |
| 19 | Poland                   | Both   | 70+ years        | 0.96 | 0.91 | 1    | 0 |
| 20 | Poland                   | Both   | Age-standardized | 1.24 | 1.18 | 1.29 | 0 |
| 21 | Suriname                 | Both   | Age-standardized | 1.24 | 1.18 | 1.29 | 0 |
| 22 | Romania                  | Male   | All Ages         | 1.44 | 1.39 | 1.48 | 0 |
| 23 | Romania                  | Male   | 15-49 years      | 1.11 | 1.05 | 1.17 | 0 |
| 24 | Romania                  | Male   | 50-69 years      | 0.3  | 0.21 | 0.39 | 0 |
| 25 | Romania                  | Male   | 70+ years        | 0.63 | 0.54 | 0.72 | 0 |
| 26 | Romania                  | Male   | Age-standardized | 0.59 | 0.57 | 0.61 | 0 |
| 27 | Romania                  | Female | All Ages         | 2.23 | 2.17 | 2.29 | 0 |
| 28 | Romania                  | Female | 15-49 years      | 1.48 | 1.46 | 1.5  | 0 |
| 29 | Romania                  | Female | 50-69 years      | 1.22 | 1.13 | 1.3  | 0 |
| 30 | Romania                  | Female | 70+ years        | 1.29 | 1.22 | 1.36 | 0 |
| 31 | Romania                  | Female | Age-standardized | 1.19 | 1.15 | 1.23 | 0 |
| 32 | Romania                  | Both   | All Ages         | 1.76 | 1.71 | 1.81 | 0 |
| 33 | Romania                  | Both   | 15-49 years      | 1.26 | 1.22 | 1.3  | 0 |
| 34 | Romania                  | Both   | 50-69 years      | 0.69 | 0.61 | 0.77 | 0 |
| 35 | Romania                  | Both   | 70+ years        | 0.95 | 0.87 | 1.03 | 0 |
| 36 | Romania                  | Both   | Age-standardized | 1.24 | 1.2  | 1.29 | 0 |
| 37 | United Arab Emirates     | Both   | Age-standardized | 1.24 | 1.2  | 1.29 | 0 |
| 38 | Bahrain                  | Male   | All Ages         | 2.41 | 2.31 | 2.52 | 0 |
| 39 | Bahrain                  | Male   | 15-49 years      | 1.6  | 1.52 | 1.68 | 0 |
| 40 | Bahrain                  | Male   | 50-69 years      | 1.04 | 1.02 | 1.06 | 0 |
| 41 | Bahrain                  | Male   | 70+ years        | 0.87 | 0.84 | 0.91 | 0 |
| 42 | Bahrain                  | Male   | Age-standardized | 1.14 | 1.12 | 1.16 | 0 |
| 43 | Bahrain                  | Female | All Ages         | 2.68 | 2.6  | 2.77 | 0 |
| 44 | Bahrain                  | Female | 15-49 years      | 1.84 | 1.8  | 1.89 | 0 |
| 45 | Bahrain                  | Female | 50-69 years      | 1.31 | 1.26 | 1.35 | 0 |
| 46 | Bahrain                  | Female | 70+ years        | 1.17 | 1.1  | 1.23 | 0 |
| 47 | Bahrain                  | Female | Age-standardized | 1.35 | 1.3  | 1.41 | 0 |
| 48 | Bahrain                  | Both   | All Ages         | 2.62 | 2.5  | 2.74 | 0 |
| 49 | Bahrain                  | Both   | 15-49 years      | 1.77 | 1.69 | 1.86 | 0 |
| 50 | Bahrain                  | Both   | 50-69 years      | 1.28 | 1.24 | 1.32 | 0 |
| 51 | Bahrain                  | Both   | 70+ years        | 0.9  | 0.87 | 0.93 | 0 |
| 52 | Bahrain                  | Both   | Age-standardized | 1.23 | 1.15 | 1.31 | 0 |
| 53 | Saudi Arabia             | Both   | Age-standardized | 1.23 | 1.15 | 1.31 | 0 |
| 54 | Panama                   | Male   | All Ages         | 1.93 | 1.87 | 1.99 | 0 |
| 55 | Panama                   | Male   | 15-49 years      | 1.45 | 1.38 | 1.52 | 0 |
| 56 | Panama                   | Male   | 50-69 years      | 1.12 | 1.07 | 1.17 | 0 |
| 57 | Panama                   | Male   | 70+ years        | 0.92 | 0.87 | 0.96 | 0 |
| 58 | Panama                   | Male   | Age-standardized | 1.15 | 1.1  | 1.19 | 0 |
| 59 | Panama                   | Female | All Ages         | 2.22 | 2.14 | 2.3  | 0 |
| 60 | Panama                   | Female | 15-49 years      | 1.65 | 1.56 | 1.75 | 0 |

|    |                            |        |                  |      |      |      |   |
|----|----------------------------|--------|------------------|------|------|------|---|
| 1  |                            |        |                  |      |      |      |   |
| 2  | Panama                     | Female | 50-69 years      | 1.33 | 1.27 | 1.39 | 0 |
| 3  | Panama                     | Female | 70+ years        | 1.15 | 1.1  | 1.21 | 0 |
| 4  | Panama                     | Female | Age-standardized | 1.33 | 1.27 | 1.4  | 0 |
| 5  | Panama                     | Both   | All Ages         | 2.05 | 1.98 | 2.12 | 0 |
| 6  | Panama                     | Both   | 15-49 years      | 1.54 | 1.46 | 1.61 | 0 |
| 7  | Panama                     | Both   | 50-69 years      | 1.2  | 1.15 | 1.25 | 0 |
| 8  | Panama                     | Both   | 70+ years        | 1    | 0.96 | 1.05 | 0 |
| 9  | Taiwan (Province of China) | Both   | Age-standardized | 1.22 | 1.16 | 1.28 | 0 |
| 10 | Indonesia                  | Male   | All Ages         | 2.34 | 2.26 | 2.42 | 0 |
| 11 | Indonesia                  | Male   | 15-49 years      | 1.8  | 1.7  | 1.9  | 0 |
| 12 | Indonesia                  | Male   | 50-69 years      | 1.33 | 1.24 | 1.42 | 0 |
| 13 | Indonesia                  | Male   | 70+ years        | 1.12 | 1.06 | 1.19 | 0 |
| 14 | Indonesia                  | Male   | Age-standardized | 1.34 | 1.26 | 1.42 | 0 |
| 15 | Indonesia                  | Female | All Ages         | 1.97 | 1.91 | 2.03 | 0 |
| 16 | Indonesia                  | Female | 15-49 years      | 1.45 | 1.39 | 1.51 | 0 |
| 17 | Indonesia                  | Female | 50-69 years      | 1.01 | 0.97 | 1.05 | 0 |
| 18 | Indonesia                  | Female | 70+ years        | 0.82 | 0.78 | 0.87 | 0 |
| 19 | Indonesia                  | Female | Age-standardized | 0.97 | 0.93 | 1.02 | 0 |
| 20 | Indonesia                  | Both   | All Ages         | 2.22 | 2.17 | 2.28 | 0 |
| 21 | Indonesia                  | Both   | 15-49 years      | 1.71 | 1.64 | 1.79 | 0 |
| 22 | Indonesia                  | Both   | 50-69 years      | 1.25 | 1.19 | 1.31 | 0 |
| 23 | Indonesia                  | Both   | 70+ years        | 0.91 | 0.87 | 0.94 | 0 |
| 24 | Indonesia                  | Both   | Age-standardized | 1.22 | 1.17 | 1.27 | 0 |
| 25 | Panama                     | Both   | Age-standardized | 1.22 | 1.17 | 1.27 | 0 |
| 26 | Solomon Islands            | Male   | All Ages         | 1.48 | 1.38 | 1.57 | 0 |
| 27 | Solomon Islands            | Male   | 15-49 years      | 1.3  | 1.21 | 1.4  | 0 |
| 28 | Solomon Islands            | Male   | 50-69 years      | 0.87 | 0.78 | 0.97 | 0 |
| 29 | Solomon Islands            | Male   | 70+ years        | 0.74 | 0.67 | 0.82 | 0 |
| 30 | Solomon Islands            | Male   | Age-standardized | 0.93 | 0.85 | 1.02 | 0 |
| 31 | Solomon Islands            | Female | All Ages         | 1.89 | 1.82 | 1.96 | 0 |
| 32 | Solomon Islands            | Female | 15-49 years      | 1.53 | 1.46 | 1.6  | 0 |
| 33 | Solomon Islands            | Female | 50-69 years      | 1.15 | 1.09 | 1.21 | 0 |
| 34 | Solomon Islands            | Female | 70+ years        | 0.97 | 0.91 | 1.04 | 0 |
| 35 | Solomon Islands            | Female | Age-standardized | 1.12 | 1.06 | 1.18 | 0 |
| 36 | Solomon Islands            | Both   | All Ages         | 1.65 | 1.57 | 1.74 | 0 |
| 37 | Solomon Islands            | Both   | 15-49 years      | 1.4  | 1.32 | 1.48 | 0 |
| 38 | Solomon Islands            | Both   | 50-69 years      | 0.98 | 0.91 | 1.05 | 0 |
| 39 | Solomon Islands            | Both   | 70+ years        | 0.79 | 0.72 | 0.86 | 0 |
| 40 | Solomon Islands            | Both   | Age-standardized | 1.22 | 1.17 | 1.28 | 0 |
| 41 | Indonesia                  | Both   | Age-standardized | 1.22 | 1.17 | 1.28 | 0 |
| 42 | Paraguay                   | Male   | All Ages         | 1.89 | 1.85 | 1.94 | 0 |
| 43 | Paraguay                   | Male   | 15-49 years      | 1.15 | 1.12 | 1.18 | 0 |
| 44 | Paraguay                   | Male   | 50-69 years      | 0.97 | 0.92 | 1.02 | 0 |
| 45 | Paraguay                   | Male   | 70+ years        | 0.76 | 0.71 | 0.82 | 0 |
| 46 | Paraguay                   | Male   | Age-standardized | 1.02 | 0.96 | 1.07 | 0 |
| 47 | Paraguay                   | Female | All Ages         | 1.95 | 1.9  | 1.99 | 0 |
| 48 | Paraguay                   | Female | 15-49 years      | 1.16 | 1.12 | 1.21 | 0 |
| 49 | Paraguay                   | Female | 50-69 years      | 0.98 | 0.93 | 1.03 | 0 |
| 50 | Paraguay                   | Female | 70+ years        | 0.88 | 0.81 | 0.94 | 0 |
| 51 | Paraguay                   | Female | Age-standardized | 1.02 | 0.96 | 1.07 | 0 |
| 52 | Paraguay                   | Both   | All Ages         | 1.92 | 1.87 | 1.97 | 0 |
| 53 | Paraguay                   | Both   | 15-49 years      | 1.17 | 1.13 | 1.2  | 0 |
| 54 | Paraguay                   | Both   | 50-69 years      | 0.98 | 0.93 | 1.03 | 0 |
| 55 | Paraguay                   | Both   | 70+ years        | 0.82 | 0.76 | 0.88 | 0 |
| 56 | Paraguay                   | Both   | Age-standardized | 1.02 | 0.96 | 1.07 | 0 |
| 57 | Cape Verde                 | Both   | Age-standardized | 1.22 | 1.18 | 1.26 | 0 |
| 58 | El Salvador                | Male   | All Ages         | 2.37 | 2.29 | 2.45 | 0 |
| 59 | El Salvador                | Male   | 15-49 years      | 1.6  | 1.44 | 1.75 | 0 |
| 60 | El Salvador                | Male   | 50-69 years      | 1.28 | 1.15 | 1.41 | 0 |

|    |               |        |                  |      |      |      |   |
|----|---------------|--------|------------------|------|------|------|---|
| 1  |               |        |                  |      |      |      |   |
| 2  | El Salvador   | Male   | 70+ years        | 1.08 | 0.96 | 1.2  | 0 |
| 3  | El Salvador   | Male   | Age-standardized | 1.35 | 1.22 | 1.48 | 0 |
| 4  | El Salvador   | Female | All Ages         | 2.61 | 2.5  | 2.72 | 0 |
| 5  | El Salvador   | Female | 15-49 years      | 1.73 | 1.56 | 1.89 | 0 |
| 6  | El Salvador   | Female | 50-69 years      | 1.35 | 1.23 | 1.48 | 0 |
| 7  | El Salvador   | Female | 70+ years        | 1.23 | 1.1  | 1.35 | 0 |
| 8  | El Salvador   | Female | Age-standardized | 1.38 | 1.25 | 1.51 | 0 |
| 9  | El Salvador   | Both   | All Ages         | 2.46 | 2.37 | 2.55 | 0 |
| 10 | El Salvador   | Both   | 15-49 years      | 1.63 | 1.48 | 1.79 | 0 |
| 11 | El Salvador   | Both   | 50-69 years      | 1.26 | 1.14 | 1.39 | 0 |
| 12 | El Salvador   | Both   | 70+ years        | 1.11 | 0.98 | 1.23 | 0 |
| 13 | United States | Both   | Age-standardized | 1.22 | 1.1  | 1.34 | 0 |
| 14 | Ireland       | Male   | All Ages         | 1.64 | 1.47 | 1.81 | 0 |
| 15 | Ireland       | Male   | 15-49 years      | 1.45 | 1.33 | 1.58 | 0 |
| 16 | Ireland       | Male   | 50-69 years      | 1.03 | 0.92 | 1.13 | 0 |
| 17 | Ireland       | Male   | 70+ years        | 0.77 | 0.67 | 0.86 | 0 |
| 18 | Ireland       | Male   | Age-standardized | 1.06 | 0.94 | 1.18 | 0 |
| 19 | Ireland       | Female | All Ages         | 1.75 | 1.59 | 1.9  | 0 |
| 20 | Ireland       | Female | 15-49 years      | 1.62 | 1.49 | 1.74 | 0 |
| 21 | Ireland       | Female | 50-69 years      | 1.25 | 1.13 | 1.37 | 0 |
| 22 | Ireland       | Female | 70+ years        | 1.14 | 1.02 | 1.26 | 0 |
| 23 | Ireland       | Female | Age-standardized | 1.27 | 1.14 | 1.4  | 0 |
| 24 | Ireland       | Both   | All Ages         | 1.67 | 1.51 | 1.84 | 0 |
| 25 | Ireland       | Both   | 15-49 years      | 1.48 | 1.35 | 1.62 | 0 |
| 26 | Ireland       | Both   | 50-69 years      | 1.11 | 1    | 1.23 | 0 |
| 27 | Ireland       | Both   | 70+ years        | 1.01 | 0.92 | 1.1  | 0 |
| 28 | Malaysia      | Both   | Age-standardized | 1.21 | 1.18 | 1.24 | 0 |
| 29 | Mali          | Male   | All Ages         | 1    | 0.99 | 1.01 | 0 |
| 30 | Mali          | Male   | 15-49 years      | 1.09 | 1.04 | 1.13 | 0 |
| 31 | Mali          | Male   | 50-69 years      | 1.13 | 1.1  | 1.16 | 0 |
| 32 | Mali          | Male   | 70+ years        | 1.15 | 1.12 | 1.19 | 0 |
| 33 | Mali          | Male   | Age-standardized | 1.18 | 1.15 | 1.2  | 0 |
| 34 | Mali          | Female | All Ages         | 0.55 | 0.52 | 0.59 | 0 |
| 35 | Mali          | Female | 15-49 years      | 0.67 | 0.66 | 0.68 | 0 |
| 36 | Mali          | Female | 50-69 years      | 0.76 | 0.74 | 0.78 | 0 |
| 37 | Mali          | Female | 70+ years        | 0.94 | 0.93 | 0.96 | 0 |
| 38 | Mali          | Female | Age-standardized | 0.84 | 0.82 | 0.86 | 0 |
| 39 | Mali          | Both   | All Ages         | 0.84 | 0.82 | 0.85 | 0 |
| 40 | Mali          | Both   | 15-49 years      | 0.94 | 0.91 | 0.96 | 0 |
| 41 | Mali          | Both   | 50-69 years      | 1.03 | 1.01 | 1.04 | 0 |
| 42 | Mali          | Both   | 70+ years        | 1.1  | 1.08 | 1.13 | 0 |
| 43 | Uruguay       | Both   | Age-standardized | 1.21 | 1.17 | 1.26 | 0 |
| 44 | Grenada       | Male   | All Ages         | 2.88 | 2.76 | 3    | 0 |
| 45 | Grenada       | Male   | 15-49 years      | 1.7  | 1.6  | 1.81 | 0 |
| 46 | Grenada       | Male   | 50-69 years      | 1.16 | 1.1  | 1.23 | 0 |
| 47 | Grenada       | Male   | 70+ years        | 1.05 | 0.96 | 1.14 | 0 |
| 48 | Grenada       | Male   | Age-standardized | 1.24 | 1.16 | 1.31 | 0 |
| 49 | Grenada       | Female | All Ages         | 2.59 | 2.48 | 2.7  | 0 |
| 50 | Grenada       | Female | 15-49 years      | 1.61 | 1.54 | 1.67 | 0 |
| 51 | Grenada       | Female | 50-69 years      | 1.1  | 1.03 | 1.16 | 0 |
| 52 | Grenada       | Female | 70+ years        | 1.15 | 1.04 | 1.25 | 0 |
| 53 | Grenada       | Female | Age-standardized | 1.18 | 1.11 | 1.25 | 0 |
| 54 | Grenada       | Both   | All Ages         | 2.8  | 2.7  | 2.9  | 0 |
| 55 | Grenada       | Both   | 15-49 years      | 1.69 | 1.6  | 1.78 | 0 |
| 56 | Grenada       | Both   | 50-69 years      | 1.26 | 1.19 | 1.32 | 0 |
| 57 | Grenada       | Both   | 70+ years        | 1.27 | 1.2  | 1.34 | 0 |

|    |                |        |                  |      |      |      |   |
|----|----------------|--------|------------------|------|------|------|---|
| 1  |                |        |                  |      |      |      |   |
| 2  | Uzbekistan     | Both   | Age-standardized | 1.21 | 1.08 | 1.34 | 0 |
| 3  | Bolivia        | Male   | All Ages         | 2.52 | 2.42 | 2.61 | 0 |
| 4  | Bolivia        | Male   | 15-49 years      | 1.7  | 1.64 | 1.76 | 0 |
| 5  | Bolivia        | Male   | 50-69 years      | 1.38 | 1.31 | 1.46 | 0 |
| 6  | Bolivia        | Male   | 70+ years        | 1.19 | 1.1  | 1.29 | 0 |
| 7  | Bolivia        | Male   | Age-standardized | 1.46 | 1.39 | 1.54 | 0 |
| 8  | Bolivia        | Female | All Ages         | 2.12 | 2.02 | 2.22 | 0 |
| 9  | Bolivia        | Female | 15-49 years      | 1.29 | 1.2  | 1.38 | 0 |
| 10 | Bolivia        | Female | 50-69 years      | 1.09 | 1    | 1.19 | 0 |
| 11 | Bolivia        | Female | 70+ years        | 0.96 | 0.85 | 1.07 | 0 |
| 12 | Bolivia        | Female | Age-standardized | 1.11 | 1    | 1.21 | 0 |
| 13 | Bolivia        | Both   | All Ages         | 2.38 | 2.28 | 2.47 | 0 |
| 14 | Bolivia        | Both   | 15-49 years      | 1.58 | 1.52 | 1.65 | 0 |
| 15 | Bolivia        | Both   | 50-69 years      | 1.29 | 1.2  | 1.37 | 0 |
| 16 | Bolivia        | Both   | 70+ years        | 1.08 | 0.98 | 1.18 | 0 |
| 17 | Yemen          | Both   | Age-standardized | 1.2  | 1.18 | 1.22 | 0 |
| 18 | United Kingdom | Male   | All Ages         | 1.28 | 1.15 | 1.42 | 0 |
| 19 | United Kingdom | Male   | 15-49 years      | 1.15 | 0.99 | 1.31 | 0 |
| 20 | United Kingdom | Male   | 50-69 years      | 1.04 | 0.91 | 1.17 | 0 |
| 21 | United Kingdom | Male   | 70+ years        | 0.73 | 0.62 | 0.84 | 0 |
| 22 | United Kingdom | Male   | Age-standardized | 1.07 | 0.93 | 1.21 | 0 |
| 23 | United Kingdom | Female | All Ages         | 1.43 | 1.28 | 1.58 | 0 |
| 24 | United Kingdom | Female | 15-49 years      | 1.39 | 1.22 | 1.56 | 0 |
| 25 | United Kingdom | Female | 50-69 years      | 1.3  | 1.15 | 1.46 | 0 |
| 26 | United Kingdom | Female | 70+ years        | 1.14 | 1    | 1.27 | 0 |
| 27 | United Kingdom | Female | Age-standardized | 1.33 | 1.17 | 1.48 | 0 |
| 28 | United Kingdom | Both   | All Ages         | 1.36 | 1.22 | 1.5  | 0 |
| 29 | United Kingdom | Both   | 15-49 years      | 1.24 | 1.08 | 1.39 | 0 |
| 30 | United Kingdom | Both   | 50-69 years      | 1.15 | 1.01 | 1.29 | 0 |
| 31 | United Kingdom | Both   | 70+ years        | 1.07 | 0.95 | 1.19 | 0 |
| 32 | Angola         | Both   | Age-standardized | 1.2  | 1.11 | 1.29 | 0 |
| 33 | Belgium        | Male   | All Ages         | 1.2  | 1.04 | 1.37 | 0 |
| 34 | Belgium        | Male   | 15-49 years      | 1.09 | 0.91 | 1.27 | 0 |
| 35 | Belgium        | Male   | 50-69 years      | 0.93 | 0.8  | 1.07 | 0 |
| 36 | Belgium        | Male   | 70+ years        | 0.65 | 0.51 | 0.78 | 0 |
| 37 | Belgium        | Male   | Age-standardized | 0.97 | 0.83 | 1.11 | 0 |
| 38 | Belgium        | Female | All Ages         | 1.31 | 1.13 | 1.49 | 0 |
| 39 | Belgium        | Female | 15-49 years      | 1.23 | 1.02 | 1.45 | 0 |
| 40 | Belgium        | Female | 50-69 years      | 1.04 | 0.91 | 1.18 | 0 |
| 41 | Belgium        | Female | 70+ years        | 0.92 | 0.79 | 1.05 | 0 |
| 42 | Belgium        | Female | Age-standardized | 1.11 | 0.96 | 1.27 | 0 |
| 43 | Belgium        | Both   | All Ages         | 1.24 | 1.08 | 1.41 | 0 |
| 44 | Belgium        | Both   | 15-49 years      | 1.12 | 0.93 | 1.31 | 0 |
| 45 | Belgium        | Both   | 50-69 years      | 1    | 0.86 | 1.13 | 0 |
| 46 | Belgium        | Both   | 70+ years        | 0.89 | 0.75 | 1.02 | 0 |
| 47 | Colombia       | Both   | Age-standardized | 1.19 | 1.14 | 1.24 | 0 |
| 48 | Laos           | Male   | All Ages         | 1.82 | 1.66 | 1.99 | 0 |
| 49 | Laos           | Male   | 15-49 years      | 1.08 | 0.99 | 1.17 | 0 |
| 50 | Laos           | Male   | 50-69 years      | 0.94 | 0.86 | 1.01 | 0 |
| 51 | Laos           | Male   | 70+ years        | 0.77 | 0.71 | 0.84 | 0 |
| 52 | Laos           | Male   | Age-standardized | 0.95 | 0.88 | 1.03 | 0 |
| 53 | Laos           | Female | All Ages         | 1.67 | 1.52 | 1.82 | 0 |
| 54 | Laos           | Female | 15-49 years      | 1.03 | 0.96 | 1.11 | 0 |
| 55 | Laos           | Female | 50-69 years      | 0.96 | 0.93 | 1    | 0 |
| 56 | Laos           | Female | 70+ years        | 0.77 | 0.74 | 0.81 | 0 |
| 57 | Laos           | Female | Age-standardized | 0.91 | 0.87 | 0.95 | 0 |

|    |                |        |                  |      |      |      |   |
|----|----------------|--------|------------------|------|------|------|---|
| 1  |                |        |                  |      |      |      |   |
| 2  | Laos           | Both   | All Ages         | 1.76 | 1.61 | 1.92 | 0 |
| 3  | Laos           | Both   | 15-49 years      | 1.08 | 1.01 | 1.16 | 0 |
| 4  | Laos           | Both   | 50-69 years      | 0.96 | 0.91 | 1.02 | 0 |
| 5  | Laos           | Both   | 70+ years        | 0.77 | 0.72 | 0.81 | 0 |
| 6  | Gabon          | Both   | Age-standardized | 1.19 | 1.12 | 1.25 | 0 |
| 7  | Azerbaijan     | Male   | All Ages         | 1.98 | 1.84 | 2.12 | 0 |
| 8  | Azerbaijan     | Male   | 15-49 years      | 1.38 | 1.26 | 1.49 | 0 |
| 9  | Azerbaijan     | Male   | 50-69 years      | 0.5  | 0.37 | 0.62 | 0 |
| 10 | Azerbaijan     | Male   | 70+ years        | 1.12 | 1.09 | 1.16 | 0 |
| 11 | Azerbaijan     | Male   | Age-standardized | 0.98 | 0.86 | 1.1  | 0 |
| 12 | Azerbaijan     | Female | All Ages         | 2.02 | 1.82 | 2.21 | 0 |
| 13 | Azerbaijan     | Female | 15-49 years      | 1.35 | 1.25 | 1.46 | 0 |
| 14 | Azerbaijan     | Female | 50-69 years      | 0.75 | 0.66 | 0.85 | 0 |
| 15 | Azerbaijan     | Female | 70+ years        | 1.7  | 1.58 | 1.82 | 0 |
| 16 | Azerbaijan     | Female | Age-standardized | 1.16 | 1.02 | 1.3  | 0 |
| 17 | Azerbaijan     | Both   | All Ages         | 2.01 | 1.84 | 2.17 | 0 |
| 18 | Azerbaijan     | Both   | 15-49 years      | 1.39 | 1.27 | 1.5  | 0 |
| 19 | Azerbaijan     | Both   | 50-69 years      | 0.62 | 0.52 | 0.73 | 0 |
| 20 | Azerbaijan     | Both   | 70+ years        | 1.58 | 1.51 | 1.66 | 0 |
| 21 | Azerbaijan     | Both   | Age-standardized | 1.19 | 1.05 | 1.33 | 0 |
| 22 | United Kingdom | Both   | Age-standardized | 1.19 | 1.05 | 1.33 | 0 |
| 23 | Egypt          | Male   | All Ages         | 1.49 | 1.45 | 1.52 | 0 |
| 24 | Egypt          | Male   | 15-49 years      | 1.18 | 1.12 | 1.23 | 0 |
| 25 | Egypt          | Male   | 50-69 years      | 0.88 | 0.87 | 0.89 | 0 |
| 26 | Egypt          | Male   | 70+ years        | 0.77 | 0.76 | 0.78 | 0 |
| 27 | Egypt          | Male   | Age-standardized | 0.96 | 0.95 | 0.97 | 0 |
| 28 | Egypt          | Female | All Ages         | 1.58 | 1.54 | 1.61 | 0 |
| 29 | Egypt          | Female | 15-49 years      | 1.26 | 1.22 | 1.3  | 0 |
| 30 | Egypt          | Female | 50-69 years      | 1.06 | 1.05 | 1.08 | 0 |
| 31 | Egypt          | Female | 70+ years        | 0.93 | 0.91 | 0.96 | 0 |
| 32 | Egypt          | Female | Age-standardized | 1.1  | 1.09 | 1.11 | 0 |
| 33 | Egypt          | Both   | All Ages         | 1.53 | 1.5  | 1.56 | 0 |
| 34 | Egypt          | Both   | 15-49 years      | 1.21 | 1.16 | 1.26 | 0 |
| 35 | Egypt          | Both   | 50-69 years      | 0.98 | 0.97 | 0.99 | 0 |
| 36 | Egypt          | Both   | 70+ years        | 0.81 | 0.79 | 0.82 | 0 |
| 37 | Egypt          | Both   | Age-standardized | 1.19 | 1.09 | 1.3  | 0 |
| 38 | Luxembourg     | Both   | Age-standardized | 1.19 | 1.09 | 1.3  | 0 |
| 39 | Guinea         | Male   | All Ages         | 0.55 | 0.48 | 0.62 | 0 |
| 40 | Guinea         | Male   | 15-49 years      | 0.58 | 0.52 | 0.64 | 0 |
| 41 | Guinea         | Male   | 50-69 years      | 0.61 | 0.53 | 0.68 | 0 |
| 42 | Guinea         | Male   | 70+ years        | 0.64 | 0.59 | 0.68 | 0 |
| 43 | Guinea         | Male   | Age-standardized | 0.66 | 0.59 | 0.72 | 0 |
| 44 | Guinea         | Female | All Ages         | 0.29 | 0.21 | 0.37 | 0 |
| 45 | Guinea         | Female | 15-49 years      | 0.31 | 0.23 | 0.39 | 0 |
| 46 | Guinea         | Female | 50-69 years      | 0.34 | 0.29 | 0.4  | 0 |
| 47 | Guinea         | Female | 70+ years        | 0.49 | 0.47 | 0.52 | 0 |
| 48 | Guinea         | Female | Age-standardized | 0.44 | 0.4  | 0.49 | 0 |
| 49 | Guinea         | Both   | All Ages         | 0.44 | 0.37 | 0.5  | 0 |
| 50 | Guinea         | Both   | 15-49 years      | 0.44 | 0.38 | 0.5  | 0 |
| 51 | Guinea         | Both   | 50-69 years      | 0.56 | 0.49 | 0.64 | 0 |
| 52 | Guinea         | Both   | 70+ years        | 0.58 | 0.52 | 0.65 | 0 |
| 53 | Guinea         | Both   | Age-standardized | 1.19 | 1.08 | 1.29 | 0 |
| 54 | Sweden         | Both   | Age-standardized | 1.19 | 1.08 | 1.29 | 0 |
| 55 | Vanuatu        | Male   | All Ages         | 1.32 | 1.26 | 1.38 | 0 |
| 56 | Vanuatu        | Male   | 15-49 years      | 0.91 | 0.85 | 0.97 | 0 |
| 57 | Vanuatu        | Male   | 50-69 years      | 0.8  | 0.77 | 0.84 | 0 |
| 58 | Vanuatu        | Male   | 70+ years        | 0.72 | 0.69 | 0.74 | 0 |
| 59 | Vanuatu        | Male   | Age-standardized | 0.8  | 0.76 | 0.83 | 0 |
| 60 | Vanuatu        | Female | All Ages         | 1.76 | 1.71 | 1.81 | 0 |



|    |             |        |                  |      |      |      |   |
|----|-------------|--------|------------------|------|------|------|---|
| 1  |             |        |                  |      |      |      |   |
| 2  | Vanuatu     | Female | 15-49 years      | 1.23 | 1.19 | 1.27 | 0 |
| 3  | Vanuatu     | Female | 50-69 years      | 1.18 | 1.14 | 1.21 | 0 |
| 4  | Vanuatu     | Female | 70+ years        | 1    | 0.96 | 1.05 | 0 |
| 5  | Vanuatu     | Female | Age-standardized | 1.12 | 1.08 | 1.15 | 0 |
| 6  | Vanuatu     | Both   | All Ages         | 1.51 | 1.47 | 1.55 | 0 |
| 7  | Vanuatu     | Both   | 15-49 years      | 1.05 | 1.02 | 1.09 | 0 |
| 8  | Vanuatu     | Both   | 50-69 years      | 0.95 | 0.93 | 0.97 | 0 |
| 9  | Vanuatu     | Both   | 70+ years        | 0.82 | 0.8  | 0.84 | 0 |
| 10 | Botswana    | Both   | Age-standardized | 1.18 | 1.14 | 1.23 | 0 |
| 11 | Libya       | Male   | All Ages         | 2.25 | 2.2  | 2.3  | 0 |
| 12 | Libya       | Male   | 15-49 years      | 1.7  | 1.59 | 1.82 | 0 |
| 13 | Libya       | Male   | 50-69 years      | 0.94 | 0.91 | 0.96 | 0 |
| 14 | Libya       | Male   | 70+ years        | 0.81 | 0.79 | 0.83 | 0 |
| 15 | Libya       | Male   | Age-standardized | 1.03 | 1    | 1.06 | 0 |
| 16 | Libya       | Female | All Ages         | 2.87 | 2.8  | 2.93 | 0 |
| 17 | Libya       | Female | 15-49 years      | 2.15 | 2.03 | 2.28 | 0 |
| 18 | Libya       | Female | 50-69 years      | 1.26 | 1.17 | 1.35 | 0 |
| 19 | Libya       | Female | 70+ years        | 1.13 | 1.05 | 1.21 | 0 |
| 20 | Libya       | Female | Age-standardized | 1.3  | 1.21 | 1.4  | 0 |
| 21 | Libya       | Both   | All Ages         | 2.49 | 2.43 | 2.55 | 0 |
| 22 | Libya       | Both   | 15-49 years      | 1.87 | 1.74 | 2    | 0 |
| 23 | Libya       | Both   | 50-69 years      | 0.99 | 0.94 | 1.03 | 0 |
| 24 | Libya       | Both   | 70+ years        | 0.97 | 0.93 | 1.01 | 0 |
| 25 | New Zealand | Both   | Age-standardized | 1.18 | 1.07 | 1.29 | 0 |
| 26 | Estonia     | Male   | All Ages         | 1.46 | 1.39 | 1.52 | 0 |
| 27 | Estonia     | Male   | 15-49 years      | 1.04 | 0.91 | 1.17 | 0 |
| 28 | Estonia     | Male   | 50-69 years      | 0.52 | 0.47 | 0.56 | 0 |
| 29 | Estonia     | Male   | 70+ years        | 0.54 | 0.46 | 0.61 | 0 |
| 30 | Estonia     | Male   | Age-standardized | 0.71 | 0.62 | 0.8  | 0 |
| 31 | Estonia     | Female | All Ages         | 2.08 | 1.94 | 2.21 | 0 |
| 32 | Estonia     | Female | 15-49 years      | 1.27 | 1.16 | 1.38 | 0 |
| 33 | Estonia     | Female | 50-69 years      | 1.14 | 1.03 | 1.25 | 0 |
| 34 | Estonia     | Female | 70+ years        | 1.4  | 1.2  | 1.6  | 0 |
| 35 | Estonia     | Female | Age-standardized | 1.22 | 1.08 | 1.35 | 0 |
| 36 | Estonia     | Both   | All Ages         | 1.71 | 1.62 | 1.8  | 0 |
| 37 | Estonia     | Both   | 15-49 years      | 1.17 | 1.04 | 1.3  | 0 |
| 38 | Estonia     | Both   | 50-69 years      | 0.83 | 0.76 | 0.9  | 0 |
| 39 | Estonia     | Both   | 70+ years        | 1.12 | 0.97 | 1.27 | 0 |
| 40 | Jordan      | Both   | Age-standardized | 1.18 | 1.16 | 1.2  | 0 |
| 41 | India       | Male   | All Ages         | 1.47 | 1.42 | 1.51 | 0 |
| 42 | India       | Male   | 15-49 years      | 0.87 | 0.86 | 0.88 | 0 |
| 43 | India       | Male   | 50-69 years      | 0.74 | 0.72 | 0.75 | 0 |
| 44 | India       | Male   | 70+ years        | 0.73 | 0.7  | 0.76 | 0 |
| 45 | India       | Male   | Age-standardized | 0.77 | 0.76 | 0.78 | 0 |
| 46 | India       | Female | All Ages         | 1.52 | 1.46 | 1.58 | 0 |
| 47 | India       | Female | 15-49 years      | 0.82 | 0.78 | 0.86 | 0 |
| 48 | India       | Female | 50-69 years      | 0.68 | 0.65 | 0.72 | 0 |
| 49 | India       | Female | 70+ years        | 0.86 | 0.82 | 0.89 | 0 |
| 50 | India       | Female | Age-standardized | 0.71 | 0.68 | 0.75 | 0 |
| 51 | India       | Both   | All Ages         | 1.48 | 1.43 | 1.53 | 0 |
| 52 | India       | Both   | 15-49 years      | 0.85 | 0.83 | 0.86 | 0 |
| 53 | India       | Both   | 50-69 years      | 0.68 | 0.65 | 0.7  | 0 |
| 54 | India       | Both   | 70+ years        | 0.71 | 0.69 | 0.74 | 0 |
| 55 | Brazil      | Both   | Age-standardized | 1.18 | 1.15 | 1.2  | 0 |
| 56 | Portugal    | Male   | All Ages         | 1.6  | 1.43 | 1.76 | 0 |
| 57 | Portugal    | Male   | 15-49 years      | 1.35 | 1.19 | 1.51 | 0 |

|    |               |        |                  |      |      |      |   |
|----|---------------|--------|------------------|------|------|------|---|
| 1  |               |        |                  |      |      |      |   |
| 2  | Portugal      | Male   | 50-69 years      | 0.92 | 0.79 | 1.05 | 0 |
| 3  | Portugal      | Male   | 70+ years        | 0.61 | 0.49 | 0.74 | 0 |
| 4  | Portugal      | Male   | Age-standardized | 0.95 | 0.82 | 1.08 | 0 |
| 5  | Portugal      | Female | All Ages         | 1.91 | 1.74 | 2.08 | 0 |
| 6  | Portugal      | Female | 15-49 years      | 1.49 | 1.34 | 1.64 | 0 |
| 7  | Portugal      | Female | 50-69 years      | 1.27 | 1.09 | 1.46 | 0 |
| 8  | Portugal      | Female | 70+ years        | 0.98 | 0.84 | 1.12 | 0 |
| 9  | Portugal      | Female | Age-standardized | 1.19 | 1.04 | 1.34 | 0 |
| 10 | Portugal      | Both   | All Ages         | 1.74 | 1.57 | 1.91 | 0 |
| 11 | Portugal      | Both   | 15-49 years      | 1.4  | 1.24 | 1.56 | 0 |
| 12 | Portugal      | Both   | 50-69 years      | 1.1  | 0.94 | 1.26 | 0 |
| 13 | Portugal      | Both   | 70+ years        | 0.83 | 0.7  | 0.96 | 0 |
| 14 | Portugal      | Both   | Age-standardized | 1.17 | 1.13 | 1.2  | 0 |
| 15 | Seychelles    | Both   | All Ages         | 2.08 | 1.97 | 2.19 | 0 |
| 16 | Dominica      | Male   | 15-49 years      | 1.35 | 1.18 | 1.51 | 0 |
| 17 | Dominica      | Male   | 50-69 years      | 0.82 | 0.74 | 0.9  | 0 |
| 18 | Dominica      | Male   | 70+ years        | 0.72 | 0.64 | 0.8  | 0 |
| 19 | Dominica      | Male   | Age-standardized | 0.95 | 0.86 | 1.03 | 0 |
| 20 | Dominica      | Female | All Ages         | 1.68 | 1.65 | 1.71 | 0 |
| 21 | Dominica      | Female | 15-49 years      | 1.31 | 1.18 | 1.44 | 0 |
| 22 | Dominica      | Female | 50-69 years      | 0.84 | 0.75 | 0.93 | 0 |
| 23 | Dominica      | Female | 70+ years        | 0.81 | 0.73 | 0.89 | 0 |
| 24 | Dominica      | Female | Age-standardized | 0.93 | 0.85 | 1.01 | 0 |
| 25 | Dominica      | Both   | All Ages         | 1.95 | 1.87 | 2.02 | 0 |
| 26 | Dominica      | Both   | 15-49 years      | 1.31 | 1.15 | 1.46 | 0 |
| 27 | Dominica      | Both   | 50-69 years      | 1.05 | 0.95 | 1.15 | 0 |
| 28 | Dominica      | Both   | 70+ years        | 0.83 | 0.74 | 0.91 | 0 |
| 29 | Dominica      | Both   | Age-standardized | 1.17 | 1.08 | 1.25 | 0 |
| 30 | Guyana        | Both   | All Ages         | 1.38 | 1.11 | 1.64 | 0 |
| 31 | Rwanda        | Male   | 15-49 years      | 0.92 | 0.71 | 1.13 | 0 |
| 32 | Rwanda        | Male   | 50-69 years      | 0.73 | 0.58 | 0.87 | 0 |
| 33 | Rwanda        | Male   | 70+ years        | 0.82 | 0.69 | 0.95 | 0 |
| 34 | Rwanda        | Male   | Age-standardized | 0.83 | 0.69 | 0.96 | 0 |
| 35 | Rwanda        | Female | All Ages         | 0.99 | 0.8  | 1.18 | 0 |
| 36 | Rwanda        | Female | 15-49 years      | 0.5  | 0.33 | 0.68 | 0 |
| 37 | Rwanda        | Female | 50-69 years      | 0.23 | 0.12 | 0.33 | 0 |
| 38 | Rwanda        | Female | 70+ years        | 0.46 | 0.34 | 0.59 | 0 |
| 39 | Rwanda        | Female | Age-standardized | 0.36 | 0.24 | 0.47 | 0 |
| 40 | Rwanda        | Both   | All Ages         | 1.22 | 0.98 | 1.47 | 0 |
| 41 | Rwanda        | Both   | 15-49 years      | 0.77 | 0.56 | 0.99 | 0 |
| 42 | Rwanda        | Both   | 50-69 years      | 0.53 | 0.39 | 0.67 | 0 |
| 43 | Rwanda        | Both   | 70+ years        | 0.38 | 0.25 | 0.51 | 0 |
| 44 | Rwanda        | Both   | Age-standardized | 1.17 | 1.1  | 1.25 | 0 |
| 45 | Guinea-Bissau | Both   | All Ages         | 2.4  | 2.33 | 2.47 | 0 |
| 46 | Venezuela     | Male   | 15-49 years      | 1.61 | 1.55 | 1.67 | 0 |
| 47 | Venezuela     | Male   | 50-69 years      | 1.2  | 1.13 | 1.26 | 0 |
| 48 | Venezuela     | Male   | 70+ years        | 0.99 | 0.93 | 1.06 | 0 |
| 49 | Venezuela     | Male   | Age-standardized | 1.28 | 1.22 | 1.35 | 0 |
| 50 | Venezuela     | Female | All Ages         | 2.52 | 2.44 | 2.61 | 0 |
| 51 | Venezuela     | Female | 15-49 years      | 1.67 | 1.6  | 1.73 | 0 |
| 52 | Venezuela     | Female | 50-69 years      | 1.32 | 1.25 | 1.4  | 0 |
| 53 | Venezuela     | Female | 70+ years        | 1.13 | 1.06 | 1.21 | 0 |
| 54 | Venezuela     | Female | Age-standardized | 1.36 | 1.28 | 1.43 | 0 |
| 55 | Venezuela     | Both   | All Ages         | 2.45 | 2.38 | 2.53 | 0 |
| 56 | Venezuela     | Both   | 15-49 years      | 1.65 | 1.58 | 1.71 | 0 |
| 57 | Venezuela     | Both   | 50-69 years      | 1.25 | 1.18 | 1.31 | 0 |
| 58 | Venezuela     | Both   | Age-standardized | 1.17 | 1.08 | 1.25 | 0 |
| 59 | Venezuela     | Both   | All Ages         | 2.45 | 2.38 | 2.53 | 0 |
| 60 | Venezuela     | Both   | 15-49 years      | 1.65 | 1.58 | 1.71 | 0 |
|    | Venezuela     | Both   | 50-69 years      | 1.25 | 1.18 | 1.31 | 0 |

|    |             |        |                  |       |       |      |       |
|----|-------------|--------|------------------|-------|-------|------|-------|
| 1  |             |        |                  |       |       |      |       |
| 2  | Venezuela   | Both   | 70+ years        | 1.05  | 0.99  | 1.11 | 0     |
| 3  | Jamaica     | Both   | Age-standardized | 1.17  | 1.05  | 1.29 | 0     |
| 4  | Ethiopia    | Male   | All Ages         | 1.17  | 1.07  | 1.26 | 0     |
| 5  | Ethiopia    | Male   | 15-49 years      | 0.92  | 0.84  | 0.99 | 0     |
| 6  | Ethiopia    | Male   | 50-69 years      | 0.9   | 0.85  | 0.94 | 0     |
| 7  | Ethiopia    | Male   | 70+ years        | 0.86  | 0.82  | 0.9  | 0     |
| 8  | Ethiopia    | Male   | Age-standardized | 0.93  | 0.88  | 0.98 | 0     |
| 9  | Ethiopia    | Female | All Ages         | 0.18  | 0.04  | 0.31 | 0.012 |
| 10 | Ethiopia    | Female | 15-49 years      | -0.04 | -0.12 | 0.03 | 0.254 |
| 11 | Ethiopia    | Female | 50-69 years      | 0     | -0.04 | 0.03 | 0.801 |
| 12 | Ethiopia    | Female | 70+ years        | 0.05  | 0.02  | 0.08 | 0.004 |
| 13 | Ethiopia    | Female | Age-standardized | 0.02  | -0.01 | 0.04 | 0.112 |
| 14 | Ethiopia    | Both   | All Ages         | 0.85  | 0.74  | 0.96 | 0     |
| 15 | Ethiopia    | Both   | 15-49 years      | 0.63  | 0.56  | 0.7  | 0     |
| 16 | Ethiopia    | Both   | 50-69 years      | 0.56  | 0.55  | 0.57 | 0     |
| 17 | Ethiopia    | Both   | 70+ years        | 0.74  | 0.7   | 0.77 | 0     |
| 18 | Ethiopia    | Both   | Age-standardized | 1.16  | 1.04  | 1.27 | 0     |
| 19 | Puerto Rico | Both   | Age-standardized | 1.16  | 1.04  | 1.27 | 0     |
| 20 | Somalia     | Male   | All Ages         | 0.58  | 0.53  | 0.62 | 0     |
| 21 | Somalia     | Male   | 15-49 years      | 0.56  | 0.39  | 0.73 | 0     |
| 22 | Somalia     | Male   | 50-69 years      | 0.54  | 0.46  | 0.62 | 0     |
| 23 | Somalia     | Male   | 70+ years        | 0.57  | 0.5   | 0.63 | 0     |
| 24 | Somalia     | Male   | Age-standardized | 0.5   | 0.44  | 0.56 | 0     |
| 25 | Somalia     | Female | All Ages         | -0.01 | -0.05 | 0.04 | 0.816 |
| 26 | Somalia     | Female | 15-49 years      | -0.04 | -0.19 | 0.12 | 0.639 |
| 27 | Somalia     | Female | 50-69 years      | 0.01  | -0.07 | 0.08 | 0.888 |
| 28 | Somalia     | Female | 70+ years        | 0.12  | 0.06  | 0.18 | 0     |
| 29 | Somalia     | Female | Age-standardized | -0.01 | -0.07 | 0.05 | 0.716 |
| 30 | Somalia     | Both   | All Ages         | 0.35  | 0.3   | 0.4  | 0     |
| 31 | Somalia     | Both   | 15-49 years      | 0.34  | 0.18  | 0.5  | 0     |
| 32 | Somalia     | Both   | 50-69 years      | 0.31  | 0.23  | 0.39 | 0     |
| 33 | Somalia     | Both   | 70+ years        | 0.28  | 0.21  | 0.35 | 0     |
| 34 | Somalia     | Both   | Age-standardized | 1.16  | 1.14  | 1.18 | 0     |
| 35 | Syria       | Both   | Age-standardized | 1.16  | 1.14  | 1.18 | 0     |
| 36 | Togo        | Male   | All Ages         | 1.9   | 1.86  | 1.94 | 0     |
| 37 | Togo        | Male   | 15-49 years      | 1.44  | 1.38  | 1.51 | 0     |
| 38 | Togo        | Male   | 50-69 years      | 1.12  | 1.04  | 1.19 | 0     |
| 39 | Togo        | Male   | 70+ years        | 1.18  | 1.11  | 1.25 | 0     |
| 40 | Togo        | Male   | Age-standardized | 1.18  | 1.11  | 1.25 | 0     |
| 41 | Togo        | Female | All Ages         | 1.71  | 1.7   | 1.72 | 0     |
| 42 | Togo        | Female | 15-49 years      | 1.1   | 1.06  | 1.14 | 0     |
| 43 | Togo        | Female | 50-69 years      | 0.82  | 0.79  | 0.84 | 0     |
| 44 | Togo        | Female | 70+ years        | 0.96  | 0.93  | 0.99 | 0     |
| 45 | Togo        | Female | Age-standardized | 0.87  | 0.85  | 0.89 | 0     |
| 46 | Togo        | Both   | All Ages         | 1.83  | 1.8   | 1.86 | 0     |
| 47 | Togo        | Both   | 15-49 years      | 1.32  | 1.27  | 1.36 | 0     |
| 48 | Togo        | Both   | 50-69 years      | 0.96  | 0.89  | 1.03 | 0     |
| 49 | Togo        | Both   | 70+ years        | 0.83  | 0.79  | 0.86 | 0     |
| 50 | Togo        | Both   | Age-standardized | 1.16  | 1.13  | 1.19 | 0     |
| 51 | Lebanon     | Both   | Age-standardized | 1.16  | 1.13  | 1.19 | 0     |
| 52 | Oman        | Male   | All Ages         | 3.39  | 3.07  | 3.71 | 0     |
| 53 | Oman        | Male   | 15-49 years      | 2.3   | 2.06  | 2.53 | 0     |
| 54 | Oman        | Male   | 50-69 years      | 1.96  | 1.85  | 2.07 | 0     |
| 55 | Oman        | Male   | 70+ years        | 1.73  | 1.61  | 1.85 | 0     |
| 56 | Oman        | Male   | Age-standardized | 2.04  | 1.93  | 2.15 | 0     |
| 57 | Oman        | Female | All Ages         | 3.8   | 3.54  | 4.05 | 0     |
| 58 | Oman        | Female | 15-49 years      | 2.55  | 2.24  | 2.87 | 0     |
| 59 | Oman        | Female | 50-69 years      | 2.09  | 1.95  | 2.23 | 0     |
| 60 | Oman        | Female | 70+ years        | 1.95  | 1.78  | 2.13 | 0     |



|    |           |        |                  |      |      |      |   |
|----|-----------|--------|------------------|------|------|------|---|
| 1  |           |        |                  |      |      |      |   |
| 2  | Oman      | Female | Age-standardized | 2.13 | 1.98 | 2.27 | 0 |
| 3  | Oman      | Both   | All Ages         | 3.66 | 3.28 | 4.04 | 0 |
| 4  | Oman      | Both   | 15-49 years      | 2.46 | 2.11 | 2.81 | 0 |
| 5  | Oman      | Both   | 50-69 years      | 2.08 | 1.96 | 2.2  | 0 |
| 6  | Oman      | Both   | 70+ years        | 1.89 | 1.77 | 2.01 | 0 |
| 7  | Spain     | Both   | Age-standardized | 1.15 | 1.01 | 1.29 | 0 |
| 8  | Canada    | Male   | All Ages         | 1.36 | 1.26 | 1.46 | 0 |
| 9  | Canada    | Male   | 15-49 years      | 0.83 | 0.71 | 0.94 | 0 |
| 10 | Canada    | Male   | 50-69 years      | 0.83 | 0.75 | 0.9  | 0 |
| 11 | Canada    | Male   | 70+ years        | 0.5  | 0.42 | 0.58 | 0 |
| 12 | Canada    | Male   | Age-standardized | 0.81 | 0.72 | 0.89 | 0 |
| 13 | Canada    | Female | All Ages         | 1.14 | 1.05 | 1.23 | 0 |
| 14 | Canada    | Female | 15-49 years      | 0.53 | 0.43 | 0.64 | 0 |
| 15 | Canada    | Female | 50-69 years      | 0.54 | 0.5  | 0.58 | 0 |
| 16 | Canada    | Female | 70+ years        | 0.44 | 0.33 | 0.55 | 0 |
| 17 | Canada    | Female | Age-standardized | 0.55 | 0.46 | 0.63 | 0 |
| 18 | Canada    | Both   | All Ages         | 1.28 | 1.18 | 1.37 | 0 |
| 19 | Canada    | Both   | 15-49 years      | 0.72 | 0.62 | 0.83 | 0 |
| 20 | Canada    | Both   | 50-69 years      | 0.72 | 0.66 | 0.79 | 0 |
| 21 | Canada    | Both   | 70+ years        | 0.54 | 0.45 | 0.63 | 0 |
| 22 | Canada    | Both   | Age-standardized | 1.15 | 1.03 | 1.27 | 0 |
| 23 | Australia | Both   | All Ages         | 2.45 | 2.36 | 2.54 | 0 |
| 24 | Vietnam   | Male   | 15-49 years      | 1.4  | 1.37 | 1.43 | 0 |
| 25 | Vietnam   | Male   | 50-69 years      | 0.89 | 0.84 | 0.93 | 0 |
| 26 | Vietnam   | Male   | 70+ years        | 0.77 | 0.72 | 0.83 | 0 |
| 27 | Vietnam   | Male   | Age-standardized | 0.9  | 0.85 | 0.95 | 0 |
| 28 | Vietnam   | Female | All Ages         | 2.5  | 2.43 | 2.57 | 0 |
| 29 | Vietnam   | Female | 15-49 years      | 1.57 | 1.54 | 1.6  | 0 |
| 30 | Vietnam   | Female | 50-69 years      | 1.1  | 1.08 | 1.13 | 0 |
| 31 | Vietnam   | Female | 70+ years        | 0.95 | 0.91 | 1    | 0 |
| 32 | Vietnam   | Female | Age-standardized | 1.07 | 1.03 | 1.1  | 0 |
| 33 | Vietnam   | Both   | All Ages         | 2.48 | 2.39 | 2.56 | 0 |
| 34 | Vietnam   | Both   | 15-49 years      | 1.49 | 1.46 | 1.52 | 0 |
| 35 | Vietnam   | Both   | 50-69 years      | 1.01 | 0.98 | 1.04 | 0 |
| 36 | Vietnam   | Both   | 70+ years        | 0.88 | 0.83 | 0.93 | 0 |
| 37 | Vietnam   | Both   | Age-standardized | 1.15 | 1.13 | 1.18 | 0 |
| 38 | Iran      | Male   | All Ages         | 1.31 | 1.25 | 1.36 | 0 |
| 39 | Sudan     | Male   | 15-49 years      | 1.23 | 1.19 | 1.27 | 0 |
| 40 | Sudan     | Male   | 50-69 years      | 1.08 | 1.06 | 1.1  | 0 |
| 41 | Sudan     | Male   | 70+ years        | 0.82 | 0.81 | 0.84 | 0 |
| 42 | Sudan     | Male   | Age-standardized | 1.1  | 1.07 | 1.13 | 0 |
| 43 | Sudan     | Female | All Ages         | 1.39 | 1.28 | 1.49 | 0 |
| 44 | Sudan     | Female | 15-49 years      | 1.35 | 1.28 | 1.42 | 0 |
| 45 | Sudan     | Female | 50-69 years      | 1.18 | 1.15 | 1.21 | 0 |
| 46 | Sudan     | Female | 70+ years        | 0.96 | 0.92 | 0.99 | 0 |
| 47 | Sudan     | Female | Age-standardized | 1.19 | 1.15 | 1.22 | 0 |
| 48 | Sudan     | Both   | All Ages         | 1.34 | 1.27 | 1.41 | 0 |
| 49 | Sudan     | Both   | 15-49 years      | 1.28 | 1.24 | 1.32 | 0 |
| 50 | Sudan     | Both   | 50-69 years      | 1.14 | 1.13 | 1.16 | 0 |
| 51 | Sudan     | Both   | 70+ years        | 0.91 | 0.9  | 0.93 | 0 |
| 52 | Sudan     | Both   | Age-standardized | 1.15 | 1.1  | 1.2  | 0 |
| 53 | Haiti     | Both   | All Ages         | 1.67 | 1.54 | 1.79 | 0 |
| 54 | Cyprus    | Male   | 15-49 years      | 1.1  | 0.98 | 1.23 | 0 |
| 55 | Cyprus    | Male   | 50-69 years      | 0.93 | 0.79 | 1.07 | 0 |
| 56 | Cyprus    | Male   | 70+ years        | 0.72 | 0.6  | 0.83 | 0 |
| 57 | Cyprus    | Male   | Age-standardized | 0.94 | 0.79 | 1.09 | 0 |

|    |                                |        |                  |      |      |      |   |
|----|--------------------------------|--------|------------------|------|------|------|---|
| 1  |                                |        |                  |      |      |      |   |
| 2  | Cyprus                         | Female | All Ages         | 1.9  | 1.74 | 2.05 | 0 |
| 3  | Cyprus                         | Female | 15-49 years      | 1.36 | 1.2  | 1.51 | 0 |
| 4  | Cyprus                         | Female | 50-69 years      | 1.2  | 1.02 | 1.39 | 0 |
| 5  | Cyprus                         | Female | 70+ years        | 1.06 | 0.88 | 1.25 | 0 |
| 6  | Cyprus                         | Female | Age-standardized | 1.18 | 1    | 1.37 | 0 |
| 7  | Cyprus                         | Both   | All Ages         | 1.73 | 1.59 | 1.87 | 0 |
| 8  | Cyprus                         | Both   | 15-49 years      | 1.14 | 1.01 | 1.28 | 0 |
| 9  | Cyprus                         | Both   | 50-69 years      | 1.08 | 0.91 | 1.24 | 0 |
| 10 | Cyprus                         | Both   | 70+ years        | 0.87 | 0.74 | 1    | 0 |
| 11 | Chile                          | Both   | Age-standardized | 1.15 | 1.04 | 1.25 | 0 |
| 12 | Italy                          | Male   | All Ages         | 1.06 | 0.93 | 1.19 | 0 |
| 13 | Italy                          | Male   | 15-49 years      | 0.99 | 0.85 | 1.13 | 0 |
| 14 | Italy                          | Male   | 50-69 years      | 0.65 | 0.55 | 0.74 | 0 |
| 15 | Italy                          | Male   | 70+ years        | 0.42 | 0.33 | 0.5  | 0 |
| 16 | Italy                          | Male   | Age-standardized | 0.66 | 0.57 | 0.75 | 0 |
| 17 | Italy                          | Female | All Ages         | 1.38 | 1.21 | 1.54 | 0 |
| 18 | Italy                          | Female | 15-49 years      | 1.29 | 1.15 | 1.44 | 0 |
| 19 | Italy                          | Female | 50-69 years      | 0.93 | 0.77 | 1.08 | 0 |
| 20 | Italy                          | Female | 70+ years        | 0.71 | 0.59 | 0.83 | 0 |
| 21 | Italy                          | Female | Age-standardized | 0.92 | 0.79 | 1.05 | 0 |
| 22 | Italy                          | Both   | All Ages         | 1.21 | 1.07 | 1.35 | 0 |
| 23 | Italy                          | Both   | 15-49 years      | 1.11 | 0.98 | 1.25 | 0 |
| 24 | Italy                          | Both   | 50-69 years      | 0.79 | 0.67 | 0.91 | 0 |
| 25 | Italy                          | Both   | 70+ years        | 0.59 | 0.49 | 0.7  | 0 |
| 26 | Italy                          | Both   | Age-standardized | 1.15 | 1.09 | 1.21 | 0 |
| 27 | Trinidad and Tobago            | Both   | All Ages         | 1.93 | 1.87 | 1.98 | 0 |
| 28 | Benin                          | Male   | All Ages         | 1.58 | 1.49 | 1.67 | 0 |
| 29 | Benin                          | Male   | 15-49 years      | 1.45 | 1.37 | 1.53 | 0 |
| 30 | Benin                          | Male   | 50-69 years      | 1.45 | 1.36 | 1.54 | 0 |
| 31 | Benin                          | Male   | 70+ years        | 1.45 | 1.36 | 1.54 | 0 |
| 32 | Benin                          | Male   | Age-standardized | 1.54 | 1.45 | 1.63 | 0 |
| 33 | Benin                          | Female | All Ages         | 1.59 | 1.52 | 1.67 | 0 |
| 34 | Benin                          | Female | 15-49 years      | 1.43 | 1.33 | 1.54 | 0 |
| 35 | Benin                          | Female | 50-69 years      | 1.3  | 1.22 | 1.37 | 0 |
| 36 | Benin                          | Female | 70+ years        | 1.46 | 1.38 | 1.55 | 0 |
| 37 | Benin                          | Female | Age-standardized | 1.43 | 1.34 | 1.53 | 0 |
| 38 | Benin                          | Both   | All Ages         | 1.83 | 1.78 | 1.88 | 0 |
| 39 | Benin                          | Both   | 15-49 years      | 1.61 | 1.53 | 1.7  | 0 |
| 40 | Benin                          | Both   | 50-69 years      | 1.46 | 1.38 | 1.54 | 0 |
| 41 | Benin                          | Both   | 70+ years        | 1.22 | 1.16 | 1.27 | 0 |
| 42 | Benin                          | Both   | Age-standardized | 1.15 | 1.01 | 1.29 | 0 |
| 43 | Federated States of Micronesia | Both   | All Ages         | 2.07 | 2.01 | 2.12 | 0 |
| 44 | Puerto Rico                    | Male   | All Ages         | 1.34 | 1.24 | 1.44 | 0 |
| 45 | Puerto Rico                    | Male   | 15-49 years      | 1.03 | 0.96 | 1.1  | 0 |
| 46 | Puerto Rico                    | Male   | 50-69 years      | 0.73 | 0.69 | 0.77 | 0 |
| 47 | Puerto Rico                    | Male   | 70+ years        | 0.73 | 0.69 | 0.77 | 0 |
| 48 | Puerto Rico                    | Male   | Age-standardized | 1.06 | 0.99 | 1.14 | 0 |
| 49 | Puerto Rico                    | Female | All Ages         | 2.38 | 2.22 | 2.55 | 0 |
| 50 | Puerto Rico                    | Female | 15-49 years      | 1.43 | 1.24 | 1.63 | 0 |
| 51 | Puerto Rico                    | Female | 50-69 years      | 1.32 | 1.15 | 1.49 | 0 |
| 52 | Puerto Rico                    | Female | 70+ years        | 1.14 | 0.97 | 1.31 | 0 |
| 53 | Puerto Rico                    | Female | Age-standardized | 1.26 | 1.08 | 1.43 | 0 |
| 54 | Puerto Rico                    | Both   | All Ages         | 2.2  | 2.1  | 2.3  | 0 |
| 55 | Puerto Rico                    | Both   | 15-49 years      | 1.39 | 1.25 | 1.53 | 0 |
| 56 | Puerto Rico                    | Both   | 50-69 years      | 1.16 | 1.04 | 1.27 | 0 |
| 57 | Puerto Rico                    | Both   | 70+ years        | 0.89 | 0.8  | 0.99 | 0 |
| 58 | Puerto Rico                    | Both   | Age-standardized | 1.14 | 1.01 | 1.27 | 0 |
| 59 | Ireland                        | Both   | All Ages         | 1.66 | 1.61 | 1.71 | 0 |
| 60 | Macedonia                      | Male   | All Ages         | 1.66 | 1.61 | 1.71 | 0 |

|    |             |        |                  |      |      |      |   |
|----|-------------|--------|------------------|------|------|------|---|
| 1  |             |        |                  |      |      |      |   |
| 2  | Macedonia   | Male   | 15-49 years      | 1.01 | 0.96 | 1.07 | 0 |
| 3  | Macedonia   | Male   | 50-69 years      | 0.34 | 0.29 | 0.4  | 0 |
| 4  | Macedonia   | Male   | 70+ years        | 0.61 | 0.55 | 0.67 | 0 |
| 5  | Macedonia   | Male   | Age-standardized | 0.65 | 0.62 | 0.68 | 0 |
| 6  | Macedonia   | Female | All Ages         | 2.3  | 2.22 | 2.37 | 0 |
| 7  | Macedonia   | Female | 15-49 years      | 1.23 | 1.17 | 1.3  | 0 |
| 8  | Macedonia   | Female | 50-69 years      | 1.1  | 1.04 | 1.16 | 0 |
| 9  | Macedonia   | Female | 70+ years        | 1.33 | 1.27 | 1.39 | 0 |
| 10 | Macedonia   | Female | Age-standardized | 1.13 | 1.06 | 1.2  | 0 |
| 11 | Macedonia   | Both   | All Ages         | 1.92 | 1.86 | 1.97 | 0 |
| 12 | Macedonia   | Both   | 15-49 years      | 1.11 | 1.06 | 1.17 | 0 |
| 13 | Macedonia   | Both   | 50-69 years      | 0.69 | 0.65 | 0.74 | 0 |
| 14 | Macedonia   | Both   | 70+ years        | 0.89 | 0.84 | 0.93 | 0 |
| 15 | Macedonia   | Both   | Age-standardized | 1.14 | 1.12 | 1.17 | 0 |
| 16 | Sudan       | Both   | All Ages         | 1.28 | 1.2  | 1.35 | 0 |
| 17 | Latvia      | Male   | 15-49 years      | 0.76 | 0.63 | 0.89 | 0 |
| 18 | Latvia      | Male   | 50-69 years      | 0.28 | 0.25 | 0.3  | 0 |
| 19 | Latvia      | Male   | 70+ years        | 0.4  | 0.34 | 0.45 | 0 |
| 20 | Latvia      | Male   | Age-standardized | 0.45 | 0.38 | 0.53 | 0 |
| 21 | Latvia      | Female | All Ages         | 1.86 | 1.73 | 1.98 | 0 |
| 22 | Latvia      | Female | 15-49 years      | 0.97 | 0.85 | 1.1  | 0 |
| 23 | Latvia      | Female | 50-69 years      | 0.82 | 0.74 | 0.9  | 0 |
| 24 | Latvia      | Female | 70+ years        | 1.13 | 1    | 1.27 | 0 |
| 25 | Latvia      | Female | Age-standardized | 0.9  | 0.79 | 1    | 0 |
| 26 | Latvia      | Both   | All Ages         | 1.49 | 1.4  | 1.58 | 0 |
| 27 | Latvia      | Both   | 15-49 years      | 0.85 | 0.71 | 0.98 | 0 |
| 28 | Latvia      | Both   | 50-69 years      | 0.54 | 0.5  | 0.58 | 0 |
| 29 | Latvia      | Both   | 70+ years        | 0.88 | 0.76 | 0.99 | 0 |
| 30 | Latvia      | Both   | Age-standardized | 1.14 | 0.99 | 1.29 | 0 |
| 31 | Denmark     | Both   | All Ages         | 2.14 | 2.06 | 2.22 | 0 |
| 32 | Guatemala   | Male   | 15-49 years      | 1.34 | 1.32 | 1.36 | 0 |
| 33 | Guatemala   | Male   | 50-69 years      | 1.22 | 1.18 | 1.26 | 0 |
| 34 | Guatemala   | Male   | 70+ years        | 1.01 | 0.97 | 1.06 | 0 |
| 35 | Guatemala   | Male   | Age-standardized | 1.29 | 1.25 | 1.32 | 0 |
| 36 | Guatemala   | Female | All Ages         | 2.42 | 2.37 | 2.48 | 0 |
| 37 | Guatemala   | Female | 15-49 years      | 1.53 | 1.49 | 1.56 | 0 |
| 38 | Guatemala   | Female | 50-69 years      | 1.31 | 1.26 | 1.36 | 0 |
| 39 | Guatemala   | Female | 70+ years        | 1.2  | 1.14 | 1.26 | 0 |
| 40 | Guatemala   | Female | Age-standardized | 1.35 | 1.3  | 1.4  | 0 |
| 41 | Guatemala   | Both   | All Ages         | 2.25 | 2.18 | 2.32 | 0 |
| 42 | Guatemala   | Both   | 15-49 years      | 1.41 | 1.39 | 1.44 | 0 |
| 43 | Guatemala   | Both   | 50-69 years      | 1.19 | 1.15 | 1.24 | 0 |
| 44 | Guatemala   | Both   | 70+ years        | 1.03 | 0.98 | 1.08 | 0 |
| 45 | Guatemala   | Both   | Age-standardized | 1.13 | 1.07 | 1.19 | 0 |
| 46 | Netherlands | Both   | All Ages         | 1.37 | 1.28 | 1.47 | 0 |
| 47 | Kiribati    | Male   | 15-49 years      | 1.08 | 0.94 | 1.21 | 0 |
| 48 | Kiribati    | Male   | 50-69 years      | 0.89 | 0.77 | 1    | 0 |
| 49 | Kiribati    | Male   | 70+ years        | 0.77 | 0.67 | 0.88 | 0 |
| 50 | Kiribati    | Male   | Age-standardized | 0.97 | 0.85 | 1.09 | 0 |
| 51 | Kiribati    | Female | All Ages         | 1.72 | 1.59 | 1.85 | 0 |
| 52 | Kiribati    | Female | 15-49 years      | 1.37 | 1.22 | 1.52 | 0 |
| 53 | Kiribati    | Female | 50-69 years      | 1.29 | 1.15 | 1.42 | 0 |
| 54 | Kiribati    | Female | 70+ years        | 1.09 | 0.94 | 1.24 | 0 |
| 55 | Kiribati    | Female | Age-standardized | 1.28 | 1.14 | 1.43 | 0 |
| 56 | Kiribati    | Both   | All Ages         | 1.54 | 1.43 | 1.65 | 0 |
| 57 | Kiribati    | Both   | 15-49 years      | 1.22 | 1.08 | 1.36 | 0 |
| 58 | Kiribati    | Both   | 50-69 years      |      |      |      |   |
| 59 | Kiribati    | Both   | 70+ years        |      |      |      |   |
| 60 | Kiribati    | Both   | Age-standardized |      |      |      |   |

|    |          |        |                  |      |      |      |   |
|----|----------|--------|------------------|------|------|------|---|
| 1  |          |        |                  |      |      |      |   |
| 2  | Kiribati | Both   | 50-69 years      | 1.08 | 0.96 | 1.2  | 0 |
| 3  | Kiribati | Both   | 70+ years        | 0.94 | 0.81 | 1.07 | 0 |
| 4  | Greece   | Both   | Age-standardized | 1.13 | 0.96 | 1.29 | 0 |
| 5  | Guyana   | Male   | All Ages         | 2.14 | 2.08 | 2.21 | 0 |
| 6  | Guyana   | Male   | 15-49 years      | 1.47 | 1.3  | 1.63 | 0 |
| 7  | Guyana   | Male   | 50-69 years      | 1.1  | 1.03 | 1.17 | 0 |
| 8  | Guyana   | Male   | 70+ years        | 0.94 | 0.86 | 1.02 | 0 |
| 9  | Guyana   | Male   | Age-standardized | 1.19 | 1.11 | 1.27 | 0 |
| 10 | Guyana   | Female | All Ages         | 2.23 | 2.16 | 2.29 | 0 |
| 11 | Guyana   | Female | 15-49 years      | 1.44 | 1.27 | 1.61 | 0 |
| 12 | Guyana   | Female | 50-69 years      | 1.09 | 1.03 | 1.16 | 0 |
| 13 | Guyana   | Female | 70+ years        | 1.05 | 0.95 | 1.15 | 0 |
| 14 | Guyana   | Female | Age-standardized | 1.16 | 1.08 | 1.24 | 0 |
| 15 | Guyana   | Both   | All Ages         | 2.18 | 2.11 | 2.24 | 0 |
| 16 | Guyana   | Both   | 15-49 years      | 1.46 | 1.29 | 1.63 | 0 |
| 17 | Guyana   | Both   | 50-69 years      | 1.1  | 1.03 | 1.17 | 0 |
| 18 | Guyana   | Both   | 70+ years        | 0.95 | 0.87 | 1.04 | 0 |
| 19 | Guyana   | Both   | Age-standardized | 1.12 | 1.06 | 1.18 | 0 |
| 20 | Brunei   | Both   | Age-standardized | 1.12 | 1.06 | 1.18 | 0 |
| 21 | Israel   | Male   | All Ages         | 1.65 | 1.51 | 1.79 | 0 |
| 22 | Israel   | Male   | 15-49 years      | 1.51 | 1.38 | 1.64 | 0 |
| 23 | Israel   | Male   | 50-69 years      | 1.19 | 1.06 | 1.32 | 0 |
| 24 | Israel   | Male   | 70+ years        | 0.94 | 0.83 | 1.04 | 0 |
| 25 | Israel   | Male   | Age-standardized | 1.27 | 1.14 | 1.4  | 0 |
| 26 | Israel   | Female | All Ages         | 1.8  | 1.66 | 1.93 | 0 |
| 27 | Israel   | Female | 15-49 years      | 1.6  | 1.49 | 1.72 | 0 |
| 28 | Israel   | Female | 50-69 years      | 1.43 | 1.33 | 1.53 | 0 |
| 29 | Israel   | Female | 70+ years        | 1.15 | 1.03 | 1.27 | 0 |
| 30 | Israel   | Female | Age-standardized | 1.44 | 1.33 | 1.56 | 0 |
| 31 | Israel   | Both   | All Ages         | 1.72 | 1.58 | 1.85 | 0 |
| 32 | Israel   | Both   | 15-49 years      | 1.56 | 1.44 | 1.68 | 0 |
| 33 | Israel   | Both   | 50-69 years      | 1.32 | 1.2  | 1.44 | 0 |
| 34 | Israel   | Both   | 70+ years        | 1.02 | 0.92 | 1.12 | 0 |
| 35 | Israel   | Both   | Age-standardized | 1.12 | 0.99 | 1.25 | 0 |
| 36 | Kiribati | Both   | Age-standardized | 1.12 | 0.99 | 1.25 | 0 |
| 37 | Iran     | Male   | All Ages         | 3.03 | 2.96 | 3.1  | 0 |
| 38 | Iran     | Male   | 15-49 years      | 1.87 | 1.76 | 1.97 | 0 |
| 39 | Iran     | Male   | 50-69 years      | 1.1  | 1.08 | 1.13 | 0 |
| 40 | Iran     | Male   | 70+ years        | 0.85 | 0.81 | 0.89 | 0 |
| 41 | Iran     | Male   | Age-standardized | 1.19 | 1.16 | 1.22 | 0 |
| 42 | Iran     | Female | All Ages         | 3.09 | 3.02 | 3.16 | 0 |
| 43 | Iran     | Female | 15-49 years      | 1.78 | 1.64 | 1.92 | 0 |
| 44 | Iran     | Female | 50-69 years      | 1.13 | 1.11 | 1.15 | 0 |
| 45 | Iran     | Female | 70+ years        | 0.97 | 0.95 | 0.99 | 0 |
| 46 | Iran     | Female | Age-standardized | 1.14 | 1.11 | 1.17 | 0 |
| 47 | Iran     | Both   | All Ages         | 3.05 | 2.98 | 3.12 | 0 |
| 48 | Iran     | Both   | 15-49 years      | 1.84 | 1.73 | 1.96 | 0 |
| 49 | Iran     | Both   | 50-69 years      | 1.03 | 1.01 | 1.05 | 0 |
| 50 | Iran     | Both   | 70+ years        | 0.87 | 0.82 | 0.93 | 0 |
| 51 | Iran     | Both   | Age-standardized | 1.12 | 1.02 | 1.21 | 0 |
| 52 | Guam     | Both   | Age-standardized | 1.12 | 1.02 | 1.21 | 0 |
| 53 | Tonga    | Male   | All Ages         | 1.39 | 1.35 | 1.43 | 0 |
| 54 | Tonga    | Male   | 15-49 years      | 1.17 | 1.12 | 1.21 | 0 |
| 55 | Tonga    | Male   | 50-69 years      | 0.61 | 0.58 | 0.65 | 0 |
| 56 | Tonga    | Male   | 70+ years        | 0.5  | 0.47 | 0.52 | 0 |
| 57 | Tonga    | Male   | Age-standardized | 0.73 | 0.7  | 0.75 | 0 |
| 58 | Tonga    | Female | All Ages         | 1.65 | 1.61 | 1.7  | 0 |
| 59 | Tonga    | Female | 15-49 years      | 1.43 | 1.37 | 1.49 | 0 |
| 60 | Tonga    | Female | 50-69 years      | 1.1  | 1.05 | 1.15 | 0 |

|    |             |        |                  |      |      |      |   |
|----|-------------|--------|------------------|------|------|------|---|
| 1  |             |        |                  |      |      |      |   |
| 2  | Tonga       | Female | 70+ years        | 0.82 | 0.76 | 0.88 | 0 |
| 3  | Tonga       | Female | Age-standardized | 1.08 | 1.04 | 1.13 | 0 |
| 4  | Tonga       | Both   | All Ages         | 1.52 | 1.48 | 1.55 | 0 |
| 5  | Tonga       | Both   | 15-49 years      | 1.3  | 1.25 | 1.35 | 0 |
| 6  | Tonga       | Both   | 50-69 years      | 0.86 | 0.82 | 0.9  | 0 |
| 7  | Tonga       | Both   | 70+ years        | 0.66 | 0.62 | 0.7  | 0 |
| 8  | Azerbaijan  | Both   | Age-standardized | 1.1  | 0.97 | 1.23 | 0 |
| 9  | Liberia     | Male   | All Ages         | 0.85 | 0.63 | 1.06 | 0 |
| 10 | Liberia     | Male   | 15-49 years      | 0.95 | 0.71 | 1.18 | 0 |
| 11 | Liberia     | Male   | 50-69 years      | 0.84 | 0.69 | 0.98 | 0 |
| 12 | Liberia     | Male   | 70+ years        | 0.79 | 0.67 | 0.91 | 0 |
| 13 | Liberia     | Male   | Age-standardized | 0.9  | 0.76 | 1.05 | 0 |
| 14 | Liberia     | Female | All Ages         | 1.04 | 0.84 | 1.25 | 0 |
| 15 | Liberia     | Female | 15-49 years      | 1    | 0.77 | 1.23 | 0 |
| 16 | Liberia     | Female | 50-69 years      | 0.78 | 0.62 | 0.94 | 0 |
| 17 | Liberia     | Female | 70+ years        | 0.93 | 0.78 | 1.09 | 0 |
| 18 | Liberia     | Female | Age-standardized | 0.89 | 0.73 | 1.05 | 0 |
| 19 | Liberia     | Both   | All Ages         | 0.92 | 0.71 | 1.13 | 0 |
| 20 | Liberia     | Both   | 15-49 years      | 0.97 | 0.74 | 1.2  | 0 |
| 21 | Liberia     | Both   | 50-69 years      | 0.79 | 0.63 | 0.95 | 0 |
| 22 | Liberia     | Both   | 70+ years        | 0.71 | 0.59 | 0.84 | 0 |
| 23 | Libya       | Both   | Age-standardized | 1.1  | 1.04 | 1.16 | 0 |
| 24 | France      | Male   | All Ages         | 1.52 | 1.37 | 1.66 | 0 |
| 25 | France      | Male   | 15-49 years      | 1.31 | 1.17 | 1.46 | 0 |
| 26 | France      | Male   | 50-69 years      | 1.16 | 1.05 | 1.27 | 0 |
| 27 | France      | Male   | 70+ years        | 0.85 | 0.73 | 0.98 | 0 |
| 28 | France      | Male   | Age-standardized | 1.18 | 1.07 | 1.3  | 0 |
| 29 | France      | Female | All Ages         | 1.73 | 1.59 | 1.88 | 0 |
| 30 | France      | Female | 15-49 years      | 1.53 | 1.37 | 1.68 | 0 |
| 31 | France      | Female | 50-69 years      | 1.33 | 1.23 | 1.44 | 0 |
| 32 | France      | Female | 70+ years        | 1.19 | 1.07 | 1.31 | 0 |
| 33 | France      | Female | Age-standardized | 1.38 | 1.26 | 1.49 | 0 |
| 34 | France      | Both   | All Ages         | 1.58 | 1.44 | 1.73 | 0 |
| 35 | France      | Both   | 15-49 years      | 1.36 | 1.22 | 1.5  | 0 |
| 36 | France      | Both   | 50-69 years      | 1.23 | 1.12 | 1.35 | 0 |
| 37 | France      | Both   | 70+ years        | 1.11 | 0.98 | 1.23 | 0 |
| 38 | Norway      | Both   | Age-standardized | 1.1  | 0.98 | 1.22 | 0 |
| 39 | Serbia      | Male   | All Ages         | 1.05 | 1.01 | 1.09 | 0 |
| 40 | Serbia      | Male   | 15-49 years      | 0.77 | 0.69 | 0.85 | 0 |
| 41 | Serbia      | Male   | 50-69 years      | 0.17 | 0.1  | 0.24 | 0 |
| 42 | Serbia      | Male   | 70+ years        | 0.38 | 0.32 | 0.43 | 0 |
| 43 | Serbia      | Male   | Age-standardized | 0.49 | 0.43 | 0.54 | 0 |
| 44 | Serbia      | Female | All Ages         | 1.83 | 1.75 | 1.9  | 0 |
| 45 | Serbia      | Female | 15-49 years      | 0.95 | 0.87 | 1.03 | 0 |
| 46 | Serbia      | Female | 50-69 years      | 0.86 | 0.78 | 0.94 | 0 |
| 47 | Serbia      | Female | 70+ years        | 1.15 | 1.09 | 1.2  | 0 |
| 48 | Serbia      | Female | Age-standardized | 0.9  | 0.81 | 0.99 | 0 |
| 49 | Serbia      | Both   | All Ages         | 1.37 | 1.32 | 1.42 | 0 |
| 50 | Serbia      | Both   | 15-49 years      | 0.83 | 0.74 | 0.91 | 0 |
| 51 | Serbia      | Both   | 50-69 years      | 0.47 | 0.4  | 0.54 | 0 |
| 52 | Serbia      | Both   | 70+ years        | 0.75 | 0.71 | 0.79 | 0 |
| 53 | Switzerland | Both   | Age-standardized | 1.09 | 1.01 | 1.17 | 0 |
| 54 | Netherlands | Male   | All Ages         | 1.47 | 1.4  | 1.55 | 0 |
| 55 | Netherlands | Male   | 15-49 years      | 1.18 | 1.05 | 1.32 | 0 |
| 56 | Netherlands | Male   | 50-69 years      | 1.1  | 1.02 | 1.17 | 0 |
| 57 | Netherlands | Male   | 70+ years        | 0.83 | 0.76 | 0.9  | 0 |



|    |             |        |                  |      |      |      |       |
|----|-------------|--------|------------------|------|------|------|-------|
| 1  |             |        |                  |      |      |      |       |
| 2  | Netherlands | Male   | Age-standardized | 1.1  | 1.02 | 1.18 | 0     |
| 3  | Netherlands | Female | All Ages         | 1.46 | 1.44 | 1.48 | 0     |
| 4  | Netherlands | Female | 15-49 years      | 1.33 | 1.24 | 1.42 | 0     |
| 5  | Netherlands | Female | 50-69 years      | 1.04 | 1    | 1.08 | 0     |
| 6  | Netherlands | Female | 70+ years        | 0.84 | 0.78 | 0.89 | 0     |
| 7  | Netherlands | Female | Age-standardized | 1.15 | 1.12 | 1.18 | 0     |
| 8  | Netherlands | Both   | All Ages         | 1.47 | 1.42 | 1.52 | 0     |
| 9  | Netherlands | Both   | 15-49 years      | 1.2  | 1.08 | 1.32 | 0     |
| 10 | Netherlands | Both   | 50-69 years      | 1.12 | 1.06 | 1.18 | 0     |
| 11 | Netherlands | Both   | 70+ years        | 1    | 0.96 | 1.04 | 0     |
| 12 | Netherlands | Both   | Age-standardized | 1.09 | 1.03 | 1.14 | 0     |
| 13 | Mexico      | Both   | Age-standardized | 1.09 | 1.03 | 1.14 | 0     |
| 14 | Lesotho     | Male   | All Ages         | 1.45 | 1.43 | 1.48 | 0     |
| 15 | Lesotho     | Male   | 15-49 years      | 1.05 | 0.98 | 1.12 | 0     |
| 16 | Lesotho     | Male   | 50-69 years      | 0.78 | 0.76 | 0.79 | 0     |
| 17 | Lesotho     | Male   | 70+ years        | 0.67 | 0.65 | 0.69 | 0     |
| 18 | Lesotho     | Male   | Age-standardized | 0.84 | 0.82 | 0.85 | 0     |
| 19 | Lesotho     | Female | All Ages         | 1.61 | 1.58 | 1.63 | 0     |
| 20 | Lesotho     | Female | 15-49 years      | 1.11 | 1.04 | 1.17 | 0     |
| 21 | Lesotho     | Female | 50-69 years      | 0.85 | 0.81 | 0.89 | 0     |
| 22 | Lesotho     | Female | 70+ years        | 0.97 | 0.92 | 1.01 | 0     |
| 23 | Lesotho     | Female | Age-standardized | 0.92 | 0.9  | 0.95 | 0     |
| 24 | Lesotho     | Both   | All Ages         | 1.51 | 1.48 | 1.53 | 0     |
| 25 | Lesotho     | Both   | 15-49 years      | 1.1  | 1.03 | 1.17 | 0     |
| 26 | Lesotho     | Both   | 50-69 years      | 0.66 | 0.65 | 0.68 | 0     |
| 27 | Lesotho     | Both   | 70+ years        | 0.7  | 0.67 | 0.73 | 0     |
| 28 | Lesotho     | Both   | Age-standardized | 1.09 | 1.01 | 1.17 | 0     |
| 29 | Bangladesh  | Both   | Age-standardized | 1.09 | 1.01 | 1.17 | 0     |
| 30 | Ukraine     | Male   | All Ages         | 1.03 | 1    | 1.06 | 0     |
| 31 | Ukraine     | Male   | 15-49 years      | 0.72 | 0.59 | 0.85 | 0     |
| 32 | Ukraine     | Male   | 50-69 years      | 0.14 | 0.06 | 0.23 | 0.002 |
| 33 | Ukraine     | Male   | 70+ years        | 0.36 | 0.34 | 0.37 | 0     |
| 34 | Ukraine     | Male   | Age-standardized | 0.43 | 0.35 | 0.5  | 0     |
| 35 | Ukraine     | Female | All Ages         | 1.68 | 1.58 | 1.78 | 0     |
| 36 | Ukraine     | Female | 15-49 years      | 1.22 | 1.11 | 1.33 | 0     |
| 37 | Ukraine     | Female | 50-69 years      | 0.89 | 0.81 | 0.98 | 0     |
| 38 | Ukraine     | Female | 70+ years        | 1.32 | 1.2  | 1.44 | 0     |
| 39 | Ukraine     | Female | Age-standardized | 1.13 | 1.02 | 1.24 | 0     |
| 40 | Ukraine     | Both   | All Ages         | 1.28 | 1.23 | 1.34 | 0     |
| 41 | Ukraine     | Both   | 15-49 years      | 0.87 | 0.75 | 1    | 0     |
| 42 | Ukraine     | Both   | 50-69 years      | 0.45 | 0.38 | 0.53 | 0     |
| 43 | Ukraine     | Both   | 70+ years        | 1.03 | 0.96 | 1.1  | 0     |
| 44 | Ukraine     | Both   | Age-standardized | 1.08 | 1.06 | 1.09 | 0     |
| 45 | Mali        | Both   | Age-standardized | 1.08 | 1.06 | 1.09 | 0     |
| 46 | Ecuador     | Male   | All Ages         | 1.84 | 1.78 | 1.91 | 0     |
| 47 | Ecuador     | Male   | 15-49 years      | 1.18 | 1.13 | 1.24 | 0     |
| 48 | Ecuador     | Male   | 50-69 years      | 0.84 | 0.79 | 0.89 | 0     |
| 49 | Ecuador     | Male   | 70+ years        | 0.67 | 0.61 | 0.73 | 0     |
| 50 | Ecuador     | Male   | Age-standardized | 0.91 | 0.86 | 0.96 | 0     |
| 51 | Ecuador     | Female | All Ages         | 1.6  | 1.51 | 1.69 | 0     |
| 52 | Ecuador     | Female | 15-49 years      | 0.88 | 0.79 | 0.96 | 0     |
| 53 | Ecuador     | Female | 50-69 years      | 0.62 | 0.55 | 0.7  | 0     |
| 54 | Ecuador     | Female | 70+ years        | 0.53 | 0.44 | 0.62 | 0     |
| 55 | Ecuador     | Female | Age-standardized | 0.62 | 0.55 | 0.7  | 0     |
| 56 | Ecuador     | Both   | All Ages         | 1.74 | 1.67 | 1.82 | 0     |
| 57 | Ecuador     | Both   | 15-49 years      | 1.06 | 1    | 1.13 | 0     |
| 58 | Ecuador     | Both   | 50-69 years      | 0.74 | 0.68 | 0.8  | 0     |
| 59 | Ecuador     | Both   | 70+ years        | 0.6  | 0.52 | 0.67 | 0     |
| 60 | Ecuador     | Both   | Age-standardized | 1.08 | 1.05 | 1.11 | 0     |
|    | Qatar       | Both   | Age-standardized | 1.08 | 1.05 | 1.11 | 0     |

|    |               |        |                  |      |      |      |   |
|----|---------------|--------|------------------|------|------|------|---|
| 1  |               |        |                  |      |      |      |   |
| 2  | Myanmar       | Male   | All Ages         | 1.97 | 1.88 | 2.07 | 0 |
| 3  | Myanmar       | Male   | 15-49 years      | 1.43 | 1.34 | 1.52 | 0 |
| 4  | Myanmar       | Male   | 50-69 years      | 1.12 | 1.02 | 1.21 | 0 |
| 5  | Myanmar       | Male   | 70+ years        | 0.93 | 0.85 | 1.01 | 0 |
| 6  | Myanmar       | Male   | Age-standardized | 1.12 | 1.03 | 1.22 | 0 |
| 7  | Myanmar       | Female | All Ages         | 2.07 | 2.01 | 2.13 | 0 |
| 8  | Myanmar       | Female | 15-49 years      | 1.41 | 1.36 | 1.45 | 0 |
| 9  | Myanmar       | Female | 50-69 years      | 1.09 | 1.06 | 1.13 | 0 |
| 10 | Myanmar       | Female | 70+ years        | 0.89 | 0.85 | 0.93 | 0 |
| 11 | Myanmar       | Female | Age-standardized | 1.04 | 1    | 1.09 | 0 |
| 12 | Myanmar       | Both   | All Ages         | 2    | 1.92 | 2.08 | 0 |
| 13 | Myanmar       | Both   | 15-49 years      | 1.41 | 1.34 | 1.48 | 0 |
| 14 | Myanmar       | Both   | 50-69 years      | 1.07 | 1    | 1.14 | 0 |
| 15 | Myanmar       | Both   | 70+ years        | 0.86 | 0.81 | 0.92 | 0 |
| 16 | Myanmar       | Both   | Age-standardized | 1.08 | 0.97 | 1.18 | 0 |
| 17 | Saint Lucia   | Both   | All Ages         | 2.46 | 2.25 | 2.66 | 0 |
| 18 | Nepal         | Male   | 15-49 years      | 1.67 | 1.51 | 1.83 | 0 |
| 19 | Nepal         | Male   | 50-69 years      | 1.58 | 1.42 | 1.73 | 0 |
| 20 | Nepal         | Male   | 70+ years        | 1.61 | 1.47 | 1.75 | 0 |
| 21 | Nepal         | Male   | Age-standardized | 1.63 | 1.48 | 1.79 | 0 |
| 22 | Nepal         | Female | All Ages         | 2.56 | 2.28 | 2.83 | 0 |
| 23 | Nepal         | Female | 15-49 years      | 1.67 | 1.46 | 1.89 | 0 |
| 24 | Nepal         | Female | 50-69 years      | 1.54 | 1.35 | 1.73 | 0 |
| 25 | Nepal         | Female | 70+ years        | 1.65 | 1.48 | 1.83 | 0 |
| 26 | Nepal         | Female | Age-standardized | 1.58 | 1.39 | 1.77 | 0 |
| 27 | Nepal         | Both   | All Ages         | 2.47 | 2.24 | 2.7  | 0 |
| 28 | Nepal         | Both   | 15-49 years      | 1.62 | 1.45 | 1.8  | 0 |
| 29 | Nepal         | Both   | 50-69 years      | 1.51 | 1.35 | 1.68 | 0 |
| 30 | Nepal         | Both   | 70+ years        | 1.58 | 1.43 | 1.73 | 0 |
| 31 | Nepal         | Both   | Age-standardized | 1.08 | 0.94 | 1.22 | 0 |
| 32 | Cote d'Ivoire | Both   | All Ages         | 1.53 | 1.45 | 1.61 | 0 |
| 33 | Namibia       | Male   | 15-49 years      | 1.2  | 1.14 | 1.26 | 0 |
| 34 | Namibia       | Male   | 50-69 years      | 0.92 | 0.86 | 0.97 | 0 |
| 35 | Namibia       | Male   | 70+ years        | 0.89 | 0.84 | 0.93 | 0 |
| 36 | Namibia       | Male   | Age-standardized | 0.99 | 0.94 | 1.04 | 0 |
| 37 | Namibia       | Female | All Ages         | 1.64 | 1.55 | 1.72 | 0 |
| 38 | Namibia       | Female | 15-49 years      | 1.18 | 1.13 | 1.24 | 0 |
| 39 | Namibia       | Female | 50-69 years      | 0.98 | 0.95 | 1.02 | 0 |
| 40 | Namibia       | Female | 70+ years        | 1.08 | 1.04 | 1.13 | 0 |
| 41 | Namibia       | Female | Age-standardized | 1.03 | 0.99 | 1.07 | 0 |
| 42 | Namibia       | Both   | All Ages         | 1.57 | 1.5  | 1.65 | 0 |
| 43 | Namibia       | Both   | 15-49 years      | 1.2  | 1.15 | 1.26 | 0 |
| 44 | Namibia       | Both   | 50-69 years      | 0.89 | 0.85 | 0.93 | 0 |
| 45 | Namibia       | Both   | 70+ years        | 0.89 | 0.85 | 0.93 | 0 |
| 46 | Namibia       | Both   | Age-standardized | 1.06 | 0.92 | 1.21 | 0 |
| 47 | Portugal      | Both   | All Ages         | 1.27 | 1.25 | 1.3  | 0 |
| 48 | Mauritania    | Male   | 15-49 years      | 1.09 | 1.04 | 1.14 | 0 |
| 49 | Mauritania    | Male   | 50-69 years      | 0.99 | 0.97 | 1.01 | 0 |
| 50 | Mauritania    | Male   | 70+ years        | 0.9  | 0.86 | 0.93 | 0 |
| 51 | Mauritania    | Male   | Age-standardized | 1.04 | 1.01 | 1.07 | 0 |
| 52 | Mauritania    | Female | All Ages         | 1.16 | 1.14 | 1.19 | 0 |
| 53 | Mauritania    | Female | 15-49 years      | 1.07 | 1.01 | 1.12 | 0 |
| 54 | Mauritania    | Female | 50-69 years      | 0.93 | 0.9  | 0.97 | 0 |
| 55 | Mauritania    | Female | 70+ years        | 1.08 | 1.05 | 1.12 | 0 |
| 56 | Mauritania    | Female | Age-standardized | 1.03 | 0.99 | 1.07 | 0 |
| 57 | Mauritania    | Both   | All Ages         | 1.22 | 1.2  | 1.25 | 0 |
| 58 | Mauritania    | Both   | All Ages         | 1.22 | 1.2  | 1.25 | 0 |



|    |                      |        |                  |      |      |      |   |
|----|----------------------|--------|------------------|------|------|------|---|
| 1  |                      |        |                  |      |      |      |   |
| 2  | Mauritania           | Both   | 15-49 years      | 1.07 | 1.02 | 1.12 | 0 |
| 3  | Mauritania           | Both   | 50-69 years      | 0.98 | 0.94 | 1.01 | 0 |
| 4  | Mauritania           | Both   | 70+ years        | 1.08 | 1.04 | 1.13 | 0 |
| 5  | Myanmar              | Both   | Age-standardized | 1.06 | 0.99 | 1.13 | 0 |
| 6  | Georgia              | Male   | All Ages         | 1.4  | 1.36 | 1.45 | 0 |
| 7  | Georgia              | Male   | 15-49 years      | 1.01 | 0.94 | 1.07 | 0 |
| 8  | Georgia              | Male   | 50-69 years      | 0.42 | 0.34 | 0.5  | 0 |
| 9  | Georgia              | Male   | 70+ years        | 0.83 | 0.78 | 0.88 | 0 |
| 10 | Georgia              | Male   | Age-standardized | 0.72 | 0.66 | 0.79 | 0 |
| 11 | Georgia              | Female | All Ages         | 1.7  | 1.61 | 1.8  | 0 |
| 12 | Georgia              | Female | 15-49 years      | 1.07 | 1.01 | 1.13 | 0 |
| 13 | Georgia              | Female | 50-69 years      | 0.82 | 0.71 | 0.94 | 0 |
| 14 | Georgia              | Female | 70+ years        | 1.19 | 1.11 | 1.27 | 0 |
| 15 | Georgia              | Female | Age-standardized | 0.95 | 0.89 | 1.02 | 0 |
| 16 | Georgia              | Both   | All Ages         | 1.55 | 1.48 | 1.62 | 0 |
| 17 | Georgia              | Both   | 15-49 years      | 1.06 | 1.02 | 1.1  | 0 |
| 18 | Georgia              | Both   | 50-69 years      | 0.61 | 0.52 | 0.7  | 0 |
| 19 | Georgia              | Both   | 70+ years        | 1.12 | 1.04 | 1.2  | 0 |
| 20 | Georgia              | Both   | Age-standardized | 1.06 | 0.98 | 1.14 | 0 |
| 21 | Cuba                 | Both   | Age-standardized | 1.06 | 0.98 | 1.14 | 0 |
| 22 | Cape Verde           | Male   | All Ages         | 2.75 | 2.58 | 2.92 | 0 |
| 23 | Cape Verde           | Male   | 15-49 years      | 1.73 | 1.66 | 1.79 | 0 |
| 24 | Cape Verde           | Male   | 50-69 years      | 1    | 0.98 | 1.03 | 0 |
| 25 | Cape Verde           | Male   | 70+ years        | 1.06 | 1.01 | 1.1  | 0 |
| 26 | Cape Verde           | Male   | Age-standardized | 1.18 | 1.14 | 1.22 | 0 |
| 27 | Cape Verde           | Female | All Ages         | 2.05 | 1.89 | 2.22 | 0 |
| 28 | Cape Verde           | Female | 15-49 years      | 1.22 | 1.12 | 1.31 | 0 |
| 29 | Cape Verde           | Female | 50-69 years      | 0.8  | 0.73 | 0.87 | 0 |
| 30 | Cape Verde           | Female | 70+ years        | 1.09 | 1.03 | 1.15 | 0 |
| 31 | Cape Verde           | Female | Age-standardized | 0.97 | 0.92 | 1.02 | 0 |
| 32 | Cape Verde           | Both   | All Ages         | 2.52 | 2.35 | 2.69 | 0 |
| 33 | Cape Verde           | Both   | 15-49 years      | 1.65 | 1.58 | 1.72 | 0 |
| 34 | Cape Verde           | Both   | 50-69 years      | 1.01 | 0.94 | 1.07 | 0 |
| 35 | Cape Verde           | Both   | 70+ years        | 1.03 | 1    | 1.06 | 0 |
| 36 | Cape Verde           | Both   | Age-standardized | 1.05 | 1.01 | 1.08 | 0 |
| 37 | Bhutan               | Both   | Age-standardized | 1.05 | 1.01 | 1.08 | 0 |
| 38 | Honduras             | Male   | All Ages         | 2.23 | 2.17 | 2.3  | 0 |
| 39 | Honduras             | Male   | 15-49 years      | 1.42 | 1.37 | 1.47 | 0 |
| 40 | Honduras             | Male   | 50-69 years      | 1.26 | 1.16 | 1.35 | 0 |
| 41 | Honduras             | Male   | 70+ years        | 1.06 | 0.98 | 1.14 | 0 |
| 42 | Honduras             | Male   | Age-standardized | 1.26 | 1.19 | 1.34 | 0 |
| 43 | Honduras             | Female | All Ages         | 2.43 | 2.36 | 2.5  | 0 |
| 44 | Honduras             | Female | 15-49 years      | 1.6  | 1.53 | 1.67 | 0 |
| 45 | Honduras             | Female | 50-69 years      | 1.35 | 1.27 | 1.44 | 0 |
| 46 | Honduras             | Female | 70+ years        | 1.27 | 1.19 | 1.34 | 0 |
| 47 | Honduras             | Female | Age-standardized | 1.39 | 1.3  | 1.48 | 0 |
| 48 | Honduras             | Both   | All Ages         | 2.3  | 2.24 | 2.37 | 0 |
| 49 | Honduras             | Both   | 15-49 years      | 1.48 | 1.42 | 1.54 | 0 |
| 50 | Honduras             | Both   | 50-69 years      | 1.27 | 1.18 | 1.37 | 0 |
| 51 | Honduras             | Both   | 70+ years        | 1.14 | 1.07 | 1.22 | 0 |
| 52 | Honduras             | Both   | Age-standardized | 1.05 | 1.01 | 1.1  | 0 |
| 53 | Dominican Republic   | Both   | Age-standardized | 1.05 | 1.01 | 1.1  | 0 |
| 54 | Virgin Islands, U.S. | Male   | All Ages         | 2.06 | 1.97 | 2.14 | 0 |
| 55 | Virgin Islands, U.S. | Male   | 15-49 years      | 1.08 | 1    | 1.16 | 0 |
| 56 | Virgin Islands, U.S. | Male   | 50-69 years      | 0.91 | 0.86 | 0.96 | 0 |
| 57 | Virgin Islands, U.S. | Male   | 70+ years        | 0.65 | 0.62 | 0.67 | 0 |
| 58 | Virgin Islands, U.S. | Male   | Age-standardized | 0.89 | 0.84 | 0.95 | 0 |
| 59 | Virgin Islands, U.S. | Female | All Ages         | 2.01 | 1.89 | 2.13 | 0 |
| 60 | Virgin Islands, U.S. | Female | 15-49 years      | 0.87 | 0.74 | 1    | 0 |

|    |                          |        |                  |      |       |      |       |
|----|--------------------------|--------|------------------|------|-------|------|-------|
| 1  |                          |        |                  |      |       |      |       |
| 2  | Virgin Islands, U.S.     | Female | 50-69 years      | 0.77 | 0.68  | 0.86 | 0     |
| 3  | Virgin Islands, U.S.     | Female | 70+ years        | 0.54 | 0.47  | 0.61 | 0     |
| 4  | Virgin Islands, U.S.     | Female | Age-standardized | 0.69 | 0.59  | 0.8  | 0     |
| 5  | Virgin Islands, U.S.     | Both   | All Ages         | 2.03 | 1.93  | 2.12 | 0     |
| 6  | Virgin Islands, U.S.     | Both   | 15-49 years      | 0.99 | 0.9   | 1.08 | 0     |
| 7  | Virgin Islands, U.S.     | Both   | 50-69 years      | 0.83 | 0.76  | 0.9  | 0     |
| 8  | Virgin Islands, U.S.     | Both   | 70+ years        | 0.61 | 0.57  | 0.65 | 0     |
| 9  | Antigua and Barbuda      | Both   | Age-standardized | 1.05 | 0.99  | 1.11 | 0     |
| 10 | Mongolia                 | Male   | All Ages         | 1.78 | 1.7   | 1.86 | 0     |
| 11 | Mongolia                 | Male   | 15-49 years      | 1.06 | 0.96  | 1.17 | 0     |
| 12 | Mongolia                 | Male   | 50-69 years      | 0.11 | 0.06  | 0.16 | 0     |
| 13 | Mongolia                 | Male   | 70+ years        | 0.46 | 0.43  | 0.48 | 0     |
| 14 | Mongolia                 | Male   | Age-standardized | 0.46 | 0.41  | 0.51 | 0     |
| 15 | Mongolia                 | Female | All Ages         | 1.59 | 1.5   | 1.68 | 0     |
| 16 | Mongolia                 | Female | 15-49 years      | 0.7  | 0.59  | 0.81 | 0     |
| 17 | Mongolia                 | Female | 50-69 years      | 0.01 | -0.05 | 0.07 | 0.698 |
| 18 | Mongolia                 | Female | 70+ years        | 0.77 | 0.67  | 0.86 | 0     |
| 19 | Mongolia                 | Female | Age-standardized | 0.33 | 0.25  | 0.4  | 0     |
| 20 | Mongolia                 | Both   | All Ages         | 1.7  | 1.61  | 1.78 | 0     |
| 21 | Mongolia                 | Both   | 15-49 years      | 0.92 | 0.81  | 1.03 | 0     |
| 22 | Mongolia                 | Both   | 50-69 years      | 0.02 | -0.03 | 0.08 | 0.355 |
| 23 | Mongolia                 | Both   | 70+ years        | 0.63 | 0.57  | 0.69 | 0     |
| 24 | Mongolia                 | Both   | Age-standardized | 1.04 | 1.01  | 1.08 | 0     |
| 25 | Mauritania               | Both   | Age-standardized | 1.04 | 1.01  | 1.08 | 0     |
| 26 | Central African Republic | Male   | All Ages         | 0.85 | 0.76  | 0.94 | 0     |
| 27 | Central African Republic | Male   | 15-49 years      | 0.52 | 0.49  | 0.55 | 0     |
| 28 | Central African Republic | Male   | 50-69 years      | 0.39 | 0.36  | 0.42 | 0     |
| 29 | Central African Republic | Male   | 70+ years        | 0.42 | 0.39  | 0.45 | 0     |
| 30 | Central African Republic | Male   | Age-standardized | 0.43 | 0.4   | 0.46 | 0     |
| 31 | Central African Republic | Female | All Ages         | 0.73 | 0.58  | 0.88 | 0     |
| 32 | Central African Republic | Female | 15-49 years      | 0.48 | 0.41  | 0.55 | 0     |
| 33 | Central African Republic | Female | 50-69 years      | 0.47 | 0.4   | 0.54 | 0     |
| 34 | Central African Republic | Female | 70+ years        | 0.65 | 0.58  | 0.72 | 0     |
| 35 | Central African Republic | Female | Age-standardized | 0.53 | 0.46  | 0.6  | 0     |
| 36 | Central African Republic | Both   | All Ages         | 0.81 | 0.7   | 0.92 | 0     |
| 37 | Central African Republic | Both   | 15-49 years      | 0.52 | 0.49  | 0.56 | 0     |
| 38 | Central African Republic | Both   | 50-69 years      | 0.47 | 0.41  | 0.52 | 0     |
| 39 | Central African Republic | Both   | 70+ years        | 0.43 | 0.38  | 0.48 | 0     |
| 40 | Slovenia                 | Both   | Age-standardized | 1.04 | 1     | 1.09 | 0     |
| 41 | Guinea-Bissau            | Male   | All Ages         | 1.61 | 1.5   | 1.72 | 0     |
| 42 | Guinea-Bissau            | Male   | 15-49 years      | 1.38 | 1.29  | 1.47 | 0     |
| 43 | Guinea-Bissau            | Male   | 50-69 years      | 1.2  | 1.11  | 1.28 | 0     |
| 44 | Guinea-Bissau            | Male   | 70+ years        | 1.19 | 1.11  | 1.27 | 0     |
| 45 | Guinea-Bissau            | Male   | Age-standardized | 1.27 | 1.18  | 1.35 | 0     |
| 46 | Guinea-Bissau            | Female | All Ages         | 1.43 | 1.34  | 1.51 | 0     |
| 47 | Guinea-Bissau            | Female | 15-49 years      | 1.11 | 1.04  | 1.18 | 0     |
| 48 | Guinea-Bissau            | Female | 50-69 years      | 0.99 | 0.93  | 1.05 | 0     |
| 49 | Guinea-Bissau            | Female | 70+ years        | 1.14 | 1.08  | 1.21 | 0     |
| 50 | Guinea-Bissau            | Female | Age-standardized | 1.07 | 1     | 1.13 | 0     |
| 51 | Guinea-Bissau            | Both   | All Ages         | 1.54 | 1.44  | 1.64 | 0     |
| 52 | Guinea-Bissau            | Both   | 15-49 years      | 1.28 | 1.2   | 1.35 | 0     |
| 53 | Guinea-Bissau            | Both   | 50-69 years      | 1.12 | 1.04  | 1.2  | 0     |
| 54 | Guinea-Bissau            | Both   | 70+ years        | 0.97 | 0.9   | 1.05 | 0     |
| 55 | Austria                  | Both   | Age-standardized | 1.03 | 0.92  | 1.15 | 0     |
| 56 | Niger                    | Male   | All Ages         | 0.43 | 0.39  | 0.48 | 0     |
| 57 | Niger                    | Male   | 15-49 years      | 0.68 | 0.59  | 0.78 | 0     |
| 58 | Niger                    | Male   | 50-69 years      | 0.77 | 0.69  | 0.85 | 0     |

|    |                                  |        |                  |      |      |      |   |
|----|----------------------------------|--------|------------------|------|------|------|---|
| 1  |                                  |        |                  |      |      |      |   |
| 2  | Niger                            | Male   | 70+ years        | 0.75 | 0.69 | 0.82 | 0 |
| 3  | Niger                            | Male   | Age-standardized | 0.81 | 0.74 | 0.88 | 0 |
| 4  | Niger                            | Female | All Ages         | 0.51 | 0.46 | 0.55 | 0 |
| 5  | Niger                            | Female | 15-49 years      | 0.63 | 0.56 | 0.69 | 0 |
| 6  | Niger                            | Female | 50-69 years      | 0.61 | 0.56 | 0.65 | 0 |
| 7  | Niger                            | Female | 70+ years        | 0.75 | 0.72 | 0.79 | 0 |
| 8  | Niger                            | Female | Age-standardized | 0.67 | 0.63 | 0.7  | 0 |
| 9  | Niger                            | Both   | All Ages         | 0.46 | 0.42 | 0.5  | 0 |
| 10 | Niger                            | Both   | 15-49 years      | 0.67 | 0.58 | 0.75 | 0 |
| 11 | Niger                            | Both   | 50-69 years      | 0.63 | 0.56 | 0.71 | 0 |
| 12 | Niger                            | Both   | 70+ years        | 0.66 | 0.61 | 0.71 | 0 |
| 13 | Niger                            | Both   | Age-standardized | 1.03 | 0.89 | 1.18 | 0 |
| 14 | Belgium                          | Both   | All Ages         | 2.51 | 2.41 | 2.61 | 0 |
| 15 | Saint Vincent and the Grenadines | Male   | 15-49 years      | 1.6  | 1.47 | 1.73 | 0 |
| 16 | Saint Vincent and the Grenadines | Male   | 50-69 years      | 0.81 | 0.75 | 0.86 | 0 |
| 17 | Saint Vincent and the Grenadines | Male   | 70+ years        | 0.6  | 0.55 | 0.66 | 0 |
| 18 | Saint Vincent and the Grenadines | Male   | Age-standardized | 0.97 | 0.9  | 1.03 | 0 |
| 19 | Saint Vincent and the Grenadines | Female | All Ages         | 3.18 | 3.04 | 3.32 | 0 |
| 20 | Saint Vincent and the Grenadines | Female | 15-49 years      | 2.44 | 2.29 | 2.59 | 0 |
| 21 | Saint Vincent and the Grenadines | Female | 50-69 years      | 1.66 | 1.55 | 1.76 | 0 |
| 22 | Saint Vincent and the Grenadines | Female | 70+ years        | 1.57 | 1.45 | 1.69 | 0 |
| 23 | Saint Vincent and the Grenadines | Female | Age-standardized | 1.8  | 1.68 | 1.92 | 0 |
| 24 | Saint Vincent and the Grenadines | Both   | All Ages         | 2.8  | 2.69 | 2.91 | 0 |
| 25 | Saint Vincent and the Grenadines | Both   | 15-49 years      | 1.93 | 1.8  | 2.06 | 0 |
| 26 | Saint Vincent and the Grenadines | Both   | 50-69 years      | 1.24 | 1.17 | 1.31 | 0 |
| 27 | Saint Vincent and the Grenadines | Both   | 70+ years        | 1.16 | 1.07 | 1.24 | 0 |
| 28 | Paraguay                         | Both   | Age-standardized | 1.02 | 0.96 | 1.08 | 0 |
| 29 | Tanzania                         | Male   | All Ages         | 1.1  | 1.06 | 1.14 | 0 |
| 30 | Tanzania                         | Male   | 15-49 years      | 1.03 | 0.99 | 1.07 | 0 |
| 31 | Tanzania                         | Male   | 50-69 years      | 0.79 | 0.76 | 0.83 | 0 |
| 32 | Tanzania                         | Male   | 70+ years        | 0.81 | 0.76 | 0.86 | 0 |
| 33 | Tanzania                         | Male   | Age-standardized | 0.86 | 0.82 | 0.89 | 0 |
| 34 | Tanzania                         | Female | All Ages         | 0.68 | 0.63 | 0.72 | 0 |
| 35 | Tanzania                         | Female | 15-49 years      | 0.62 | 0.58 | 0.66 | 0 |
| 36 | Tanzania                         | Female | 50-69 years      | 0.37 | 0.33 | 0.4  | 0 |
| 37 | Tanzania                         | Female | 70+ years        | 0.51 | 0.45 | 0.56 | 0 |
| 38 | Tanzania                         | Female | Age-standardized | 0.45 | 0.42 | 0.49 | 0 |
| 39 | Tanzania                         | Both   | All Ages         | 0.93 | 0.9  | 0.97 | 0 |
| 40 | Tanzania                         | Both   | 15-49 years      | 0.88 | 0.84 | 0.91 | 0 |
| 41 | Tanzania                         | Both   | 50-69 years      | 0.65 | 0.61 | 0.69 | 0 |
| 42 | Tanzania                         | Both   | 70+ years        | 0.57 | 0.53 | 0.62 | 0 |
| 43 | Egypt                            | Both   | Age-standardized | 1.02 | 1.01 | 1.03 | 0 |
| 44 | Burkina Faso                     | Male   | All Ages         | 1.37 | 1.31 | 1.43 | 0 |
| 45 | Burkina Faso                     | Male   | 15-49 years      | 1.23 | 1.18 | 1.29 | 0 |
| 46 | Burkina Faso                     | Male   | 50-69 years      | 1.05 | 1    | 1.09 | 0 |
| 47 | Burkina Faso                     | Male   | 70+ years        | 1.05 | 1.02 | 1.09 | 0 |
| 48 | Burkina Faso                     | Male   | Age-standardized | 1.11 | 1.07 | 1.15 | 0 |
| 49 | Burkina Faso                     | Female | All Ages         | 0.95 | 0.9  | 1    | 0 |
| 50 | Burkina Faso                     | Female | 15-49 years      | 0.81 | 0.78 | 0.85 | 0 |
| 51 | Burkina Faso                     | Female | 50-69 years      | 0.67 | 0.64 | 0.71 | 0 |
| 52 | Burkina Faso                     | Female | 70+ years        | 0.81 | 0.78 | 0.83 | 0 |
| 53 | Burkina Faso                     | Female | Age-standardized | 0.77 | 0.74 | 0.8  | 0 |
| 54 | Burkina Faso                     | Both   | All Ages         | 1.22 | 1.17 | 1.27 | 0 |
| 55 | Burkina Faso                     | Both   | 15-49 years      | 1.12 | 1.07 | 1.16 | 0 |
| 56 | Burkina Faso                     | Both   | 50-69 years      | 0.86 | 0.83 | 0.89 | 0 |
| 57 | Burkina Faso                     | Both   | 70+ years        | 0.89 | 0.88 | 0.9  | 0 |

|    |                  |        |                  |      |      |      |   |
|----|------------------|--------|------------------|------|------|------|---|
| 1  |                  |        |                  |      |      |      |   |
| 2  | Togo             | Both   | Age-standardized | 1.02 | 0.97 | 1.07 | 0 |
| 3  | Bermuda          | Male   | All Ages         | 1.71 | 1.66 | 1.77 | 0 |
| 4  | Bermuda          | Male   | 15-49 years      | 1.25 | 1.15 | 1.34 | 0 |
| 5  | Bermuda          | Male   | 50-69 years      | 0.89 | 0.85 | 0.93 | 0 |
| 6  | Bermuda          | Male   | 70+ years        | 0.7  | 0.66 | 0.75 | 0 |
| 7  | Bermuda          | Male   | Age-standardized | 0.97 | 0.92 | 1.02 | 0 |
| 8  | Bermuda          | Female | All Ages         | 1.85 | 1.8  | 1.91 | 0 |
| 9  | Bermuda          | Female | 15-49 years      | 1.26 | 1.15 | 1.37 | 0 |
| 10 | Bermuda          | Female | 50-69 years      | 1.02 | 0.97 | 1.08 | 0 |
| 11 | Bermuda          | Female | 70+ years        | 0.85 | 0.77 | 0.93 | 0 |
| 12 | Bermuda          | Female | Age-standardized | 1.05 | 0.98 | 1.12 | 0 |
| 13 | Bermuda          | Both   | All Ages         | 1.77 | 1.72 | 1.82 | 0 |
| 14 | Bermuda          | Both   | 15-49 years      | 1.25 | 1.15 | 1.35 | 0 |
| 15 | Bermuda          | Both   | 50-69 years      | 0.95 | 0.9  | 1    | 0 |
| 16 | Bermuda          | Both   | 70+ years        | 0.81 | 0.74 | 0.88 | 0 |
| 17 | Cyprus           | Both   | Age-standardized | 1.02 | 0.85 | 1.18 | 0 |
| 18 | Marshall Islands | Male   | All Ages         | 2.16 | 2.12 | 2.21 | 0 |
| 19 | Marshall Islands | Male   | 15-49 years      | 1.12 | 1.07 | 1.17 | 0 |
| 20 | Marshall Islands | Male   | 50-69 years      | 0.72 | 0.7  | 0.74 | 0 |
| 21 | Marshall Islands | Male   | 70+ years        | 0.58 | 0.55 | 0.61 | 0 |
| 22 | Marshall Islands | Male   | Age-standardized | 0.78 | 0.76 | 0.8  | 0 |
| 23 | Marshall Islands | Female | All Ages         | 2.44 | 2.37 | 2.52 | 0 |
| 24 | Marshall Islands | Female | 15-49 years      | 1.43 | 1.33 | 1.53 | 0 |
| 25 | Marshall Islands | Female | 50-69 years      | 1.03 | 0.96 | 1.1  | 0 |
| 26 | Marshall Islands | Female | 70+ years        | 0.88 | 0.81 | 0.94 | 0 |
| 27 | Marshall Islands | Female | Age-standardized | 1.02 | 0.97 | 1.08 | 0 |
| 28 | Marshall Islands | Both   | All Ages         | 2.29 | 2.24 | 2.33 | 0 |
| 29 | Marshall Islands | Both   | 15-49 years      | 1.26 | 1.19 | 1.33 | 0 |
| 30 | Marshall Islands | Both   | 50-69 years      | 0.85 | 0.81 | 0.89 | 0 |
| 31 | Marshall Islands | Both   | 70+ years        | 0.74 | 0.7  | 0.79 | 0 |
| 32 | Papua New Guinea | Both   | Age-standardized | 1.02 | 0.99 | 1.06 | 0 |
| 33 | High-middle SDI  | Male   | All Ages         | 2.05 | 2.04 | 2.07 | 0 |
| 34 | High-middle SDI  | Male   | 15-49 years      | 1.5  | 1.41 | 1.58 | 0 |
| 35 | High-middle SDI  | Male   | 50-69 years      | 0.86 | 0.8  | 0.93 | 0 |
| 36 | High-middle SDI  | Male   | 70+ years        | 0.68 | 0.65 | 0.7  | 0 |
| 37 | High-middle SDI  | Male   | Age-standardized | 1.05 | 1    | 1.1  | 0 |
| 38 | High-middle SDI  | Female | All Ages         | 2.36 | 2.35 | 2.37 | 0 |
| 39 | High-middle SDI  | Female | 15-49 years      | 1.71 | 1.63 | 1.78 | 0 |
| 40 | High-middle SDI  | Female | 50-69 years      | 1.38 | 1.34 | 1.42 | 0 |
| 41 | High-middle SDI  | Female | 70+ years        | 1.23 | 1.21 | 1.24 | 0 |
| 42 | High-middle SDI  | Female | Age-standardized | 1.37 | 1.35 | 1.4  | 0 |
| 43 | High-middle SDI  | Both   | All Ages         | 2.18 | 2.17 | 2.2  | 0 |
| 44 | High-middle SDI  | Both   | 15-49 years      | 1.59 | 1.51 | 1.67 | 0 |
| 45 | High-middle SDI  | Both   | 50-69 years      | 1.09 | 1.04 | 1.14 | 0 |
| 46 | High-middle SDI  | Both   | 70+ years        | 1.03 | 1.02 | 1.03 | 0 |
| 47 | High-middle SDI  | Both   | Age-standardized | 1.21 | 1.17 | 1.25 | 0 |
| 48 | Japan            | Male   | All Ages         | 1.21 | 1.14 | 1.29 | 0 |
| 49 | Japan            | Male   | 15-49 years      | 0.74 | 0.71 | 0.77 | 0 |
| 50 | Japan            | Male   | 50-69 years      | 0.61 | 0.59 | 0.62 | 0 |
| 51 | Japan            | Male   | 70+ years        | 0.25 | 0.22 | 0.29 | 0 |
| 52 | Japan            | Male   | Age-standardized | 0.5  | 0.47 | 0.53 | 0 |
| 53 | Japan            | Female | All Ages         | 1.8  | 1.69 | 1.91 | 0 |
| 54 | Japan            | Female | 15-49 years      | 1.05 | 1.01 | 1.09 | 0 |
| 55 | Japan            | Female | 50-69 years      | 0.96 | 0.9  | 1.02 | 0 |
| 56 | Japan            | Female | 70+ years        | 0.68 | 0.61 | 0.75 | 0 |
| 57 | Japan            | Female | Age-standardized | 0.84 | 0.79 | 0.9  | 0 |

|    |                 |        |                  |      |      |      |   |
|----|-----------------|--------|------------------|------|------|------|---|
| 1  |                 |        |                  |      |      |      |   |
| 2  | Japan           | Both   | All Ages         | 1.39 | 1.3  | 1.47 | 0 |
| 3  | Japan           | Both   | 15-49 years      | 0.83 | 0.79 | 0.86 | 0 |
| 4  | Japan           | Both   | 50-69 years      | 0.75 | 0.73 | 0.78 | 0 |
| 5  | Japan           | Both   | 70+ years        | 0.54 | 0.49 | 0.59 | 0 |
| 6  | Singapore       | Both   | Age-standardized | 1.02 | 0.92 | 1.12 | 0 |
| 7  | Switzerland     | Male   | All Ages         | 1.38 | 1.29 | 1.47 | 0 |
| 8  | Switzerland     | Male   | 15-49 years      | 1.13 | 1.02 | 1.24 | 0 |
| 9  | Switzerland     | Male   | 50-69 years      | 1.02 | 0.93 | 1.11 | 0 |
| 10 | Switzerland     | Male   | 70+ years        | 0.76 | 0.69 | 0.83 | 0 |
| 11 | Switzerland     | Male   | Age-standardized | 1.03 | 0.94 | 1.12 | 0 |
| 12 | Switzerland     | Female | All Ages         | 1.41 | 1.33 | 1.49 | 0 |
| 13 | Switzerland     | Female | 15-49 years      | 1.21 | 1.12 | 1.3  | 0 |
| 14 | Switzerland     | Female | 50-69 years      | 1.12 | 1.04 | 1.21 | 0 |
| 15 | Switzerland     | Female | 70+ years        | 0.98 | 0.9  | 1.06 | 0 |
| 16 | Switzerland     | Female | Age-standardized | 1.12 | 1.04 | 1.21 | 0 |
| 17 | Switzerland     | Both   | All Ages         | 1.4  | 1.32 | 1.48 | 0 |
| 18 | Switzerland     | Both   | 15-49 years      | 1.13 | 1.04 | 1.22 | 0 |
| 19 | Switzerland     | Both   | 50-69 years      | 1.12 | 1.03 | 1.21 | 0 |
| 20 | Switzerland     | Both   | 70+ years        | 1    | 0.94 | 1.06 | 0 |
| 21 | Switzerland     | Both   | Age-standardized | 1.01 | 0.91 | 1.1  | 0 |
| 22 | Dominica        | Both   | Age-standardized | 1.01 | 0.91 | 1.1  | 0 |
| 23 | Qatar           | Male   | All Ages         | 1.75 | 1.68 | 1.81 | 0 |
| 24 | Qatar           | Male   | 15-49 years      | 1.05 | 1.01 | 1.1  | 0 |
| 25 | Qatar           | Male   | 50-69 years      | 0.94 | 0.92 | 0.97 | 0 |
| 26 | Qatar           | Male   | 70+ years        | 0.72 | 0.71 | 0.74 | 0 |
| 27 | Qatar           | Male   | Age-standardized | 0.99 | 0.97 | 1.01 | 0 |
| 28 | Qatar           | Female | All Ages         | 2.04 | 1.98 | 2.09 | 0 |
| 29 | Qatar           | Female | 15-49 years      | 1.15 | 1.1  | 1.19 | 0 |
| 30 | Qatar           | Female | 50-69 years      | 0.95 | 0.92 | 0.98 | 0 |
| 31 | Qatar           | Female | 70+ years        | 0.85 | 0.82 | 0.89 | 0 |
| 32 | Qatar           | Female | Age-standardized | 0.94 | 0.91 | 0.98 | 0 |
| 33 | Qatar           | Both   | All Ages         | 2.06 | 1.96 | 2.16 | 0 |
| 34 | Qatar           | Both   | 15-49 years      | 1.22 | 1.2  | 1.24 | 0 |
| 35 | Qatar           | Both   | 50-69 years      | 1.01 | 0.99 | 1.04 | 0 |
| 36 | Qatar           | Both   | 70+ years        | 0.83 | 0.8  | 0.87 | 0 |
| 37 | Qatar           | Both   | Age-standardized | 1.01 | 0.95 | 1.07 | 0 |
| 38 | Bermuda         | Both   | Age-standardized | 1.01 | 0.95 | 1.07 | 0 |
| 39 | Haiti           | Male   | All Ages         | 1.6  | 1.55 | 1.65 | 0 |
| 40 | Haiti           | Male   | 15-49 years      | 1.17 | 1.13 | 1.21 | 0 |
| 41 | Haiti           | Male   | 50-69 years      | 1.04 | 0.99 | 1.09 | 0 |
| 42 | Haiti           | Male   | 70+ years        | 0.91 | 0.85 | 0.98 | 0 |
| 43 | Haiti           | Male   | Age-standardized | 1.07 | 1.03 | 1.11 | 0 |
| 44 | Haiti           | Female | All Ages         | 2.04 | 1.98 | 2.1  | 0 |
| 45 | Haiti           | Female | 15-49 years      | 1.51 | 1.47 | 1.56 | 0 |
| 46 | Haiti           | Female | 50-69 years      | 1.21 | 1.16 | 1.27 | 0 |
| 47 | Haiti           | Female | 70+ years        | 1.22 | 1.15 | 1.29 | 0 |
| 48 | Haiti           | Female | Age-standardized | 1.3  | 1.25 | 1.36 | 0 |
| 49 | Haiti           | Both   | All Ages         | 1.79 | 1.73 | 1.84 | 0 |
| 50 | Haiti           | Both   | 15-49 years      | 1.31 | 1.27 | 1.35 | 0 |
| 51 | Haiti           | Both   | 50-69 years      | 1.08 | 1.03 | 1.13 | 0 |
| 52 | Haiti           | Both   | 70+ years        | 1.03 | 0.95 | 1.1  | 0 |
| 53 | Haiti           | Both   | Age-standardized | 1    | 0.93 | 1.07 | 0 |
| 54 | Solomon Islands | Both   | Age-standardized | 1    | 0.93 | 1.07 | 0 |
| 55 | Peru            | Male   | All Ages         | 2.4  | 2.34 | 2.45 | 0 |
| 56 | Peru            | Male   | 15-49 years      | 1.73 | 1.68 | 1.79 | 0 |
| 57 | Peru            | Male   | 50-69 years      | 1.28 | 1.23 | 1.33 | 0 |
| 58 | Peru            | Male   | 70+ years        | 1.03 | 0.97 | 1.08 | 0 |
| 59 | Peru            | Male   | Age-standardized | 1.35 | 1.29 | 1.4  | 0 |
| 60 | Peru            | Female | All Ages         | 2.26 | 2.2  | 2.33 | 0 |



|    |             |        |                  |       |       |       |       |
|----|-------------|--------|------------------|-------|-------|-------|-------|
| 1  |             |        |                  |       |       |       |       |
| 2  | Peru        | Female | 15-49 years      | 1.44  | 1.42  | 1.47  | 0     |
| 3  | Peru        | Female | 50-69 years      | 1.04  | 1     | 1.09  | 0     |
| 4  | Peru        | Female | 70+ years        | 1.1   | 1.04  | 1.17  | 0     |
| 5  | Peru        | Female | Age-standardized | 1.13  | 1.09  | 1.16  | 0     |
| 6  | Peru        | Both   | All Ages         | 2.36  | 2.31  | 2.42  | 0     |
| 7  | Peru        | Both   | 15-49 years      | 1.66  | 1.62  | 1.7   | 0     |
| 8  | Peru        | Both   | 50-69 years      | 1.18  | 1.14  | 1.23  | 0     |
| 9  | Peru        | Both   | 70+ years        | 1.08  | 1.04  | 1.12  | 0     |
| 10 | Vietnam     | Both   | Age-standardized | 1     | 0.96  | 1.04  | 0     |
| 11 | South Sudan | Male   | All Ages         | 0.14  | 0.06  | 0.21  | 0.001 |
| 12 | South Sudan | Male   | 15-49 years      | 0.61  | 0.6   | 0.63  | 0     |
| 13 | South Sudan | Male   | 50-69 years      | 0.49  | 0.45  | 0.53  | 0     |
| 14 | South Sudan | Male   | 70+ years        | 0.53  | 0.49  | 0.56  | 0     |
| 15 | South Sudan | Male   | Age-standardized | 0.55  | 0.51  | 0.59  | 0     |
| 16 | South Sudan | Female | All Ages         | 0.17  | 0.1   | 0.24  | 0     |
| 17 | South Sudan | Female | 15-49 years      | 0.33  | 0.3   | 0.37  | 0     |
| 18 | South Sudan | Female | 50-69 years      | 0.1   | 0.07  | 0.14  | 0     |
| 19 | South Sudan | Female | 70+ years        | 0.25  | 0.21  | 0.29  | 0     |
| 20 | South Sudan | Female | Age-standardized | 0.18  | 0.15  | 0.2   | 0     |
| 21 | South Sudan | Both   | All Ages         | 0.11  | 0.04  | 0.19  | 0.003 |
| 22 | South Sudan | Both   | 15-49 years      | 0.44  | 0.41  | 0.46  | 0     |
| 23 | South Sudan | Both   | 50-69 years      | 0.27  | 0.23  | 0.31  | 0     |
| 24 | South Sudan | Both   | 70+ years        | 0.48  | 0.47  | 0.48  | 0     |
| 25 | Turkey      | Both   | Age-standardized | 1     | 0.94  | 1.07  | 0     |
| 26 | Luxembourg  | Male   | All Ages         | 1.28  | 1.2   | 1.35  | 0     |
| 27 | Luxembourg  | Male   | 15-49 years      | 1.16  | 1.03  | 1.3   | 0     |
| 28 | Luxembourg  | Male   | 50-69 years      | 1.03  | 0.92  | 1.14  | 0     |
| 29 | Luxembourg  | Male   | 70+ years        | 0.8   | 0.7   | 0.9   | 0     |
| 30 | Luxembourg  | Male   | Age-standardized | 1.07  | 0.96  | 1.17  | 0     |
| 31 | Luxembourg  | Female | All Ages         | 1.41  | 1.31  | 1.51  | 0     |
| 32 | Luxembourg  | Female | 15-49 years      | 1.38  | 1.23  | 1.53  | 0     |
| 33 | Luxembourg  | Female | 50-69 years      | 1.27  | 1.15  | 1.39  | 0     |
| 34 | Luxembourg  | Female | 70+ years        | 1.26  | 1.14  | 1.39  | 0     |
| 35 | Luxembourg  | Female | Age-standardized | 1.32  | 1.21  | 1.44  | 0     |
| 36 | Luxembourg  | Both   | All Ages         | 1.35  | 1.27  | 1.43  | 0     |
| 37 | Luxembourg  | Both   | 15-49 years      | 1.22  | 1.09  | 1.35  | 0     |
| 38 | Luxembourg  | Both   | 50-69 years      | 1.19  | 1.07  | 1.31  | 0     |
| 39 | Luxembourg  | Both   | 70+ years        | 1.2   | 1.09  | 1.3   | 0     |
| 40 | Belize      | Both   | Age-standardized | 1     | 0.9   | 1.11  | 0     |
| 41 | Burundi     | Male   | All Ages         | 0.68  | 0.64  | 0.72  | 0     |
| 42 | Burundi     | Male   | 15-49 years      | 0.33  | 0.26  | 0.4   | 0     |
| 43 | Burundi     | Male   | 50-69 years      | 0.3   | 0.27  | 0.33  | 0     |
| 44 | Burundi     | Male   | 70+ years        | 0.37  | 0.35  | 0.4   | 0     |
| 45 | Burundi     | Male   | Age-standardized | 0.36  | 0.35  | 0.38  | 0     |
| 46 | Burundi     | Female | All Ages         | -0.09 | -0.19 | 0.02  | 0.094 |
| 47 | Burundi     | Female | 15-49 years      | -0.15 | -0.26 | -0.04 | 0.011 |
| 48 | Burundi     | Female | 50-69 years      | -0.05 | -0.11 | 0.01  | 0.127 |
| 49 | Burundi     | Female | 70+ years        | 0.13  | 0.08  | 0.18  | 0     |
| 50 | Burundi     | Female | Age-standardized | 0.05  | 0.01  | 0.1   | 0.023 |
| 51 | Burundi     | Both   | All Ages         | 0.41  | 0.34  | 0.47  | 0     |
| 52 | Burundi     | Both   | 15-49 years      | 0.18  | 0.09  | 0.26  | 0     |
| 53 | Burundi     | Both   | 50-69 years      | 0.32  | 0.29  | 0.35  | 0     |
| 54 | Burundi     | Both   | 70+ years        | 0.38  | 0.33  | 0.42  | 0     |
| 55 | Estonia     | Both   | Age-standardized | 0.99  | 0.88  | 1.11  | 0     |
| 56 | New Zealand | Male   | All Ages         | 1.65  | 1.52  | 1.78  | 0     |
| 57 | New Zealand | Male   | 15-49 years      | 1.33  | 1.16  | 1.5   | 0     |

|    |              |        |                  |       |       |       |       |
|----|--------------|--------|------------------|-------|-------|-------|-------|
| 1  |              |        |                  |       |       |       |       |
| 2  | New Zealand  | Male   | 50-69 years      | 1.17  | 1.05  | 1.29  | 0     |
| 3  | New Zealand  | Male   | 70+ years        | 0.84  | 0.72  | 0.95  | 0     |
| 4  | New Zealand  | Male   | Age-standardized | 1.21  | 1.08  | 1.34  | 0     |
| 5  | New Zealand  | Female | All Ages         | 1.64  | 1.56  | 1.72  | 0     |
| 6  | New Zealand  | Female | 15-49 years      | 1.3   | 1.17  | 1.43  | 0     |
| 7  | New Zealand  | Female | 50-69 years      | 1.15  | 1.06  | 1.23  | 0     |
| 8  | New Zealand  | Female | 70+ years        | 0.99  | 0.89  | 1.08  | 0     |
| 9  | New Zealand  | Female | Age-standardized | 1.17  | 1.07  | 1.27  | 0     |
| 10 | New Zealand  | Both   | All Ages         | 1.63  | 1.52  | 1.74  | 0     |
| 11 | New Zealand  | Both   | 15-49 years      | 1.28  | 1.13  | 1.43  | 0     |
| 12 | New Zealand  | Both   | 50-69 years      | 1.12  | 1.01  | 1.23  | 0     |
| 13 | New Zealand  | Both   | 70+ years        | 1.05  | 0.94  | 1.16  | 0     |
| 14 | New Zealand  | Both   | Age-standardized | 0.99  | 0.95  | 1.03  | 0     |
| 15 | Namibia      | Both   | All Ages         | 1.01  | 0.94  | 1.08  | 0     |
| 16 | Slovakia     | Male   | 15-49 years      | 0.52  | 0.4   | 0.64  | 0     |
| 17 | Slovakia     | Male   | 50-69 years      | -0.22 | -0.37 | -0.07 | 0.005 |
| 18 | Slovakia     | Male   | 70+ years        | 0.04  | -0.03 | 0.12  | 0.248 |
| 19 | Slovakia     | Male   | Age-standardized | 0.13  | 0.05  | 0.2   | 0.002 |
| 20 | Slovakia     | Female | All Ages         | 1.44  | 1.37  | 1.52  | 0     |
| 21 | Slovakia     | Female | 15-49 years      | 0.68  | 0.58  | 0.79  | 0     |
| 22 | Slovakia     | Female | 50-69 years      | 0.46  | 0.3   | 0.62  | 0     |
| 23 | Slovakia     | Female | 70+ years        | 0.59  | 0.52  | 0.66  | 0     |
| 24 | Slovakia     | Female | Age-standardized | 0.53  | 0.45  | 0.6   | 0     |
| 25 | Slovakia     | Both   | All Ages         | 1.16  | 1.08  | 1.24  | 0     |
| 26 | Slovakia     | Both   | 15-49 years      | 0.59  | 0.47  | 0.71  | 0     |
| 27 | Slovakia     | Both   | 50-69 years      | 0.1   | -0.05 | 0.25  | 0.17  |
| 28 | Slovakia     | Both   | 70+ years        | 0.23  | 0.15  | 0.31  | 0     |
| 29 | Slovakia     | Both   | Age-standardized | 0.99  | 0.97  | 1.01  | 0     |
| 30 | Burkina Faso | Both   | All Ages         | 1.71  | 1.66  | 1.76  | 0     |
| 31 | Kenya        | Male   | 15-49 years      | 1.27  | 1.24  | 1.31  | 0     |
| 32 | Kenya        | Male   | 50-69 years      | 0.97  | 0.91  | 1.02  | 0     |
| 33 | Kenya        | Male   | 70+ years        | 1.03  | 0.97  | 1.09  | 0     |
| 34 | Kenya        | Male   | Age-standardized | 1.05  | 1.02  | 1.08  | 0     |
| 35 | Kenya        | Female | All Ages         | 0.94  | 0.88  | 1.01  | 0     |
| 36 | Kenya        | Female | 15-49 years      | 0.48  | 0.43  | 0.54  | 0     |
| 37 | Kenya        | Female | 50-69 years      | 0.1   | 0.05  | 0.16  | 0.001 |
| 38 | Kenya        | Female | 70+ years        | 0.24  | 0.18  | 0.3   | 0     |
| 39 | Kenya        | Female | Age-standardized | 0.22  | 0.18  | 0.27  | 0     |
| 40 | Kenya        | Both   | All Ages         | 1.44  | 1.38  | 1.5   | 0     |
| 41 | Kenya        | Both   | 15-49 years      | 1     | 0.96  | 1.04  | 0     |
| 42 | Kenya        | Both   | 50-69 years      | 0.67  | 0.62  | 0.73  | 0     |
| 43 | Kenya        | Both   | 70+ years        | 0.49  | 0.42  | 0.57  | 0     |
| 44 | Kenya        | Both   | Age-standardized | 0.97  | 0.96  | 0.99  | 0     |
| 45 | Argentina    | Both   | All Ages         | 1.58  | 1.52  | 1.64  | 0     |
| 46 | Fiji         | Male   | 15-49 years      | 0.89  | 0.78  | 1     | 0     |
| 47 | Fiji         | Male   | 50-69 years      | 0.59  | 0.49  | 0.69  | 0     |
| 48 | Fiji         | Male   | 70+ years        | 0.49  | 0.39  | 0.59  | 0     |
| 49 | Fiji         | Male   | Age-standardized | 0.62  | 0.51  | 0.73  | 0     |
| 50 | Fiji         | Female | All Ages         | 1.95  | 1.93  | 1.98  | 0     |
| 51 | Fiji         | Female | 15-49 years      | 1.2   | 1.16  | 1.23  | 0     |
| 52 | Fiji         | Female | 50-69 years      | 1.03  | 0.99  | 1.07  | 0     |
| 53 | Fiji         | Female | 70+ years        | 0.88  | 0.85  | 0.9   | 0     |
| 54 | Fiji         | Female | Age-standardized | 0.98  | 0.94  | 1.01  | 0     |
| 55 | Fiji         | Both   | All Ages         | 1.75  | 1.72  | 1.78  | 0     |
| 56 | Fiji         | Both   | 15-49 years      | 1.03  | 0.96  | 1.1   | 0     |
| 57 | Fiji         | Both   | 50-69 years      | 0.8   | 0.73  | 0.87  | 0     |
| 58 | Fiji         | Both   | Age-standardized | 0.98  | 0.94  | 1.01  | 0     |
| 59 | Fiji         | Both   | All Ages         | 1.75  | 1.72  | 1.78  | 0     |
| 60 | Fiji         | Both   | 15-49 years      | 1.03  | 0.96  | 1.1   | 0     |
| 61 | Fiji         | Both   | 50-69 years      | 0.8   | 0.73  | 0.87  | 0     |



|    |                        |        |                  |      |      |      |   |
|----|------------------------|--------|------------------|------|------|------|---|
| 1  |                        |        |                  |      |      |      |   |
| 2  | Fiji                   | Both   | 70+ years        | 0.65 | 0.59 | 0.71 | 0 |
| 3  | Kuwait                 | Both   | Age-standardized | 0.96 | 0.92 | 0.99 | 0 |
| 4  | Bosnia and Herzegovina | Male   | All Ages         | 2.12 | 1.94 | 2.29 | 0 |
| 5  | Bosnia and Herzegovina | Male   | 15-49 years      | 1.34 | 1.23 | 1.45 | 0 |
| 6  | Bosnia and Herzegovina | Male   | 50-69 years      | 0.79 | 0.57 | 1.01 | 0 |
| 7  | Bosnia and Herzegovina | Male   | 70+ years        | 1.17 | 0.93 | 1.41 | 0 |
| 8  | Bosnia and Herzegovina | Male   | Age-standardized | 1.04 | 0.91 | 1.17 | 0 |
| 9  | Bosnia and Herzegovina | Female | All Ages         | 2.47 | 2.33 | 2.62 | 0 |
| 10 | Bosnia and Herzegovina | Female | 15-49 years      | 1.57 | 1.45 | 1.7  | 0 |
| 11 | Bosnia and Herzegovina | Female | 50-69 years      | 1.4  | 1.24 | 1.56 | 0 |
| 12 | Bosnia and Herzegovina | Female | 70+ years        | 1.66 | 1.48 | 1.83 | 0 |
| 13 | Bosnia and Herzegovina | Female | Age-standardized | 1.45 | 1.32 | 1.58 | 0 |
| 14 | Bosnia and Herzegovina | Both   | All Ages         | 2.27 | 2.11 | 2.43 | 0 |
| 15 | Bosnia and Herzegovina | Both   | 15-49 years      | 1.43 | 1.32 | 1.54 | 0 |
| 16 | Bosnia and Herzegovina | Both   | 50-69 years      | 1.08 | 0.89 | 1.27 | 0 |
| 17 | Bosnia and Herzegovina | Both   | 70+ years        | 1.5  | 1.28 | 1.72 | 0 |
| 18 | Laos                   | Both   | Age-standardized | 0.95 | 0.89 | 1.01 | 0 |
| 19 | Sweden                 | Male   | All Ages         | 1.24 | 1.14 | 1.35 | 0 |
| 20 | Sweden                 | Male   | 15-49 years      | 1.1  | 0.98 | 1.21 | 0 |
| 21 | Sweden                 | Male   | 50-69 years      | 1.08 | 0.99 | 1.17 | 0 |
| 22 | Sweden                 | Male   | 70+ years        | 0.77 | 0.7  | 0.84 | 0 |
| 23 | Sweden                 | Male   | Age-standardized | 1.08 | 0.98 | 1.19 | 0 |
| 24 | Sweden                 | Female | All Ages         | 1.4  | 1.29 | 1.52 | 0 |
| 25 | Sweden                 | Female | 15-49 years      | 1.32 | 1.21 | 1.44 | 0 |
| 26 | Sweden                 | Female | 50-69 years      | 1.32 | 1.23 | 1.42 | 0 |
| 27 | Sweden                 | Female | 70+ years        | 1.14 | 1.04 | 1.23 | 0 |
| 28 | Sweden                 | Female | Age-standardized | 1.32 | 1.21 | 1.43 | 0 |
| 29 | Sweden                 | Both   | All Ages         | 1.32 | 1.21 | 1.42 | 0 |
| 30 | Sweden                 | Both   | 15-49 years      | 1.17 | 1.05 | 1.28 | 0 |
| 31 | Sweden                 | Both   | 50-69 years      | 1.19 | 1.1  | 1.29 | 0 |
| 32 | Sweden                 | Both   | 70+ years        | 1.02 | 0.96 | 1.09 | 0 |
| 33 | Pakistan               | Both   | Age-standardized | 0.94 | 0.91 | 0.97 | 0 |
| 34 | Antigua and Barbuda    | Male   | All Ages         | 1.89 | 1.81 | 1.97 | 0 |
| 35 | Antigua and Barbuda    | Male   | 15-49 years      | 1.39 | 1.33 | 1.46 | 0 |
| 36 | Antigua and Barbuda    | Male   | 50-69 years      | 0.93 | 0.89 | 0.97 | 0 |
| 37 | Antigua and Barbuda    | Male   | 70+ years        | 0.68 | 0.65 | 0.71 | 0 |
| 38 | Antigua and Barbuda    | Male   | Age-standardized | 1.02 | 0.98 | 1.06 | 0 |
| 39 | Antigua and Barbuda    | Female | All Ages         | 1.89 | 1.76 | 2.01 | 0 |
| 40 | Antigua and Barbuda    | Female | 15-49 years      | 1.44 | 1.38 | 1.5  | 0 |
| 41 | Antigua and Barbuda    | Female | 50-69 years      | 0.94 | 0.86 | 1.03 | 0 |
| 42 | Antigua and Barbuda    | Female | 70+ years        | 0.91 | 0.84 | 0.97 | 0 |
| 43 | Antigua and Barbuda    | Female | Age-standardized | 1.05 | 0.98 | 1.12 | 0 |
| 44 | Antigua and Barbuda    | Both   | All Ages         | 1.9  | 1.79 | 2.01 | 0 |
| 45 | Antigua and Barbuda    | Both   | 15-49 years      | 1.42 | 1.37 | 1.47 | 0 |
| 46 | Antigua and Barbuda    | Both   | 50-69 years      | 0.96 | 0.9  | 1.02 | 0 |
| 47 | Antigua and Barbuda    | Both   | 70+ years        | 0.83 | 0.78 | 0.87 | 0 |
| 48 | Armenia                | Both   | Age-standardized | 0.93 | 0.86 | 1.01 | 0 |
| 49 | Low SDI                | Male   | All Ages         | 1.18 | 1.09 | 1.27 | 0 |
| 50 | Low SDI                | Male   | 15-49 years      | 0.9  | 0.87 | 0.94 | 0 |
| 51 | Low SDI                | Male   | 50-69 years      | 0.73 | 0.68 | 0.77 | 0 |
| 52 | Low SDI                | Male   | 70+ years        | 0.74 | 0.69 | 0.79 | 0 |
| 53 | Low SDI                | Male   | Age-standardized | 0.82 | 0.78 | 0.86 | 0 |
| 54 | Low SDI                | Female | All Ages         | 1.13 | 1.03 | 1.23 | 0 |
| 55 | Low SDI                | Female | 15-49 years      | 0.78 | 0.72 | 0.84 | 0 |
| 56 | Low SDI                | Female | 50-69 years      | 0.61 | 0.56 | 0.67 | 0 |
| 57 | Low SDI                | Female | 70+ years        | 0.72 | 0.67 | 0.78 | 0 |

|    |           |        |                  |      |      |      |       |
|----|-----------|--------|------------------|------|------|------|-------|
| 1  |           |        |                  |      |      |      |       |
| 2  | Low SDI   | Female | Age-standardized | 0.69 | 0.64 | 0.75 | 0     |
| 3  | Low SDI   | Both   | All Ages         | 1.15 | 1.06 | 1.24 | 0     |
| 4  | Low SDI   | Both   | 15-49 years      | 0.85 | 0.8  | 0.89 | 0     |
| 5  | Low SDI   | Both   | 50-69 years      | 0.64 | 0.59 | 0.69 | 0     |
| 6  | Low SDI   | Both   | 70+ years        | 0.66 | 0.62 | 0.7  | 0     |
| 7  | Low SDI   | Both   | Age-standardized | 0.74 | 0.7  | 0.79 | 0     |
| 8  | Zambia    | Male   | All Ages         | 0.84 | 0.74 | 0.95 | 0     |
| 9  | Zambia    | Male   | 15-49 years      | 0.85 | 0.82 | 0.88 | 0     |
| 10 | Zambia    | Male   | 50-69 years      | 0.56 | 0.53 | 0.59 | 0     |
| 11 | Zambia    | Male   | 70+ years        | 0.59 | 0.55 | 0.63 | 0     |
| 12 | Zambia    | Male   | Age-standardized | 0.63 | 0.6  | 0.65 | 0     |
| 13 | Zambia    | Female | All Ages         | 0.37 | 0.26 | 0.49 | 0     |
| 14 | Zambia    | Female | 15-49 years      | 0.26 | 0.21 | 0.32 | 0     |
| 15 | Zambia    | Female | 50-69 years      | 0.05 | 0.01 | 0.1  | 0.027 |
| 16 | Zambia    | Female | 70+ years        | 0.18 | 0.14 | 0.22 | 0     |
| 17 | Zambia    | Female | Age-standardized | 0.12 | 0.07 | 0.16 | 0     |
| 18 | Zambia    | Both   | All Ages         | 0.66 | 0.55 | 0.77 | 0     |
| 19 | Zambia    | Both   | 15-49 years      | 0.63 | 0.59 | 0.67 | 0     |
| 20 | Zambia    | Both   | 50-69 years      | 0.32 | 0.28 | 0.37 | 0     |
| 21 | Zambia    | Both   | 70+ years        | 0.2  | 0.18 | 0.23 | 0     |
| 22 | Zambia    | Both   | Age-standardized | 0.93 | 0.91 | 0.95 | 0     |
| 23 | Vanuatu   | Both   | All Ages         | 1.25 | 1.13 | 1.38 | 0     |
| 24 | Denmark   | Male   | 15-49 years      | 1.13 | 0.92 | 1.34 | 0     |
| 25 | Denmark   | Male   | 50-69 years      | 1.08 | 0.94 | 1.21 | 0     |
| 26 | Denmark   | Male   | 70+ years        | 0.82 | 0.71 | 0.93 | 0     |
| 27 | Denmark   | Male   | Age-standardized | 1.08 | 0.93 | 1.23 | 0     |
| 28 | Denmark   | Female | All Ages         | 1.33 | 1.19 | 1.46 | 0     |
| 29 | Denmark   | Female | 15-49 years      | 1.26 | 1.04 | 1.47 | 0     |
| 30 | Denmark   | Female | 50-69 years      | 1.25 | 1.1  | 1.4  | 0     |
| 31 | Denmark   | Female | 70+ years        | 1.03 | 0.89 | 1.16 | 0     |
| 32 | Denmark   | Female | Age-standardized | 1.22 | 1.06 | 1.38 | 0     |
| 33 | Denmark   | Both   | All Ages         | 1.29 | 1.16 | 1.42 | 0     |
| 34 | Denmark   | Both   | 15-49 years      | 1.14 | 0.93 | 1.35 | 0     |
| 35 | Denmark   | Both   | 50-69 years      | 1.17 | 1.02 | 1.32 | 0     |
| 36 | Denmark   | Both   | 70+ years        | 1.07 | 0.98 | 1.17 | 0     |
| 37 | Denmark   | Both   | Age-standardized | 0.92 | 0.82 | 1.03 | 0     |
| 38 | Palestine | Both   | All Ages         | 2.17 | 2.06 | 2.28 | 0     |
| 39 | Jamaica   | Male   | 15-49 years      | 1.48 | 1.33 | 1.63 | 0     |
| 40 | Jamaica   | Male   | 50-69 years      | 1.07 | 0.97 | 1.17 | 0     |
| 41 | Jamaica   | Male   | 70+ years        | 0.83 | 0.74 | 0.93 | 0     |
| 42 | Jamaica   | Male   | Age-standardized | 1.15 | 1.04 | 1.27 | 0     |
| 43 | Jamaica   | Female | All Ages         | 2.12 | 2.01 | 2.23 | 0     |
| 44 | Jamaica   | Female | 15-49 years      | 1.49 | 1.33 | 1.64 | 0     |
| 45 | Jamaica   | Female | 50-69 years      | 1.07 | 0.95 | 1.18 | 0     |
| 46 | Jamaica   | Female | 70+ years        | 0.97 | 0.85 | 1.09 | 0     |
| 47 | Jamaica   | Female | Age-standardized | 1.15 | 1.03 | 1.28 | 0     |
| 48 | Jamaica   | Both   | All Ages         | 2.16 | 2.04 | 2.27 | 0     |
| 49 | Jamaica   | Both   | 15-49 years      | 1.5  | 1.35 | 1.65 | 0     |
| 50 | Jamaica   | Both   | 50-69 years      | 1.09 | 0.98 | 1.2  | 0     |
| 51 | Jamaica   | Both   | 70+ years        | 0.92 | 0.8  | 1.03 | 0     |
| 52 | Jamaica   | Both   | Age-standardized | 0.91 | 0.87 | 0.96 | 0     |
| 53 | Samoa     | Both   | All Ages         | 2.25 | 2.15 | 2.35 | 0     |
| 54 | Syria     | Male   | 15-49 years      | 1.68 | 1.6  | 1.76 | 0     |
| 55 | Syria     | Male   | 50-69 years      | 1.08 | 1.07 | 1.1  | 0     |
| 56 | Syria     | Male   | 70+ years        | 0.99 | 0.94 | 1.03 | 0     |
| 57 | Syria     | Male   | Age-standardized | 1.14 | 1.12 | 1.16 | 0     |

|    |                  |        |                  |      |      |      |   |
|----|------------------|--------|------------------|------|------|------|---|
| 1  |                  |        |                  |      |      |      |   |
| 2  | Syria            | Female | All Ages         | 2.31 | 2.22 | 2.39 | 0 |
| 3  | Syria            | Female | 15-49 years      | 1.7  | 1.61 | 1.78 | 0 |
| 4  | Syria            | Female | 50-69 years      | 1.18 | 1.15 | 1.21 | 0 |
| 5  | Syria            | Female | 70+ years        | 1.09 | 1.05 | 1.13 | 0 |
| 6  | Syria            | Female | Age-standardized | 1.2  | 1.17 | 1.23 | 0 |
| 7  | Syria            | Both   | All Ages         | 2.27 | 2.18 | 2.37 | 0 |
| 8  | Syria            | Both   | 15-49 years      | 1.69 | 1.61 | 1.76 | 0 |
| 9  | Syria            | Both   | 50-69 years      | 1.13 | 1.12 | 1.15 | 0 |
| 10 | Syria            | Both   | 70+ years        | 0.98 | 0.93 | 1.03 | 0 |
| 11 | Tonga            | Both   | Age-standardized | 0.91 | 0.87 | 0.94 | 0 |
| 12 | Iraq             | Male   | All Ages         | 1.44 | 1.36 | 1.52 | 0 |
| 13 | Iraq             | Male   | 15-49 years      | 0.95 | 0.9  | 1.01 | 0 |
| 14 | Iraq             | Male   | 50-69 years      | 0.66 | 0.62 | 0.7  | 0 |
| 15 | Iraq             | Male   | 70+ years        | 0.54 | 0.51 | 0.57 | 0 |
| 16 | Iraq             | Male   | Age-standardized | 0.68 | 0.64 | 0.72 | 0 |
| 17 | Iraq             | Female | All Ages         | 1.15 | 1.02 | 1.28 | 0 |
| 18 | Iraq             | Female | 15-49 years      | 0.67 | 0.59 | 0.76 | 0 |
| 19 | Iraq             | Female | 50-69 years      | 0.44 | 0.37 | 0.52 | 0 |
| 20 | Iraq             | Female | 70+ years        | 0.34 | 0.28 | 0.4  | 0 |
| 21 | Iraq             | Female | Age-standardized | 0.43 | 0.35 | 0.51 | 0 |
| 22 | Iraq             | Both   | All Ages         | 1.33 | 1.24 | 1.43 | 0 |
| 23 | Iraq             | Both   | 15-49 years      | 0.85 | 0.78 | 0.91 | 0 |
| 24 | Iraq             | Both   | 50-69 years      | 0.59 | 0.54 | 0.63 | 0 |
| 25 | Iraq             | Both   | 70+ years        | 0.5  | 0.46 | 0.54 | 0 |
| 26 | Iraq             | Both   | Age-standardized | 0.9  | 0.81 | 0.99 | 0 |
| 27 | Afghanistan      | Both   | Age-standardized | 0.9  | 0.81 | 0.99 | 0 |
| 28 | American Samoa   | Male   | All Ages         | 1.45 | 1.42 | 1.48 | 0 |
| 29 | American Samoa   | Male   | 15-49 years      | 0.93 | 0.86 | 0.99 | 0 |
| 30 | American Samoa   | Male   | 50-69 years      | 0.67 | 0.65 | 0.68 | 0 |
| 31 | American Samoa   | Male   | 70+ years        | 0.55 | 0.53 | 0.56 | 0 |
| 32 | American Samoa   | Male   | Age-standardized | 0.74 | 0.72 | 0.75 | 0 |
| 33 | American Samoa   | Female | All Ages         | 1.78 | 1.76 | 1.8  | 0 |
| 34 | American Samoa   | Female | 15-49 years      | 1.11 | 1    | 1.23 | 0 |
| 35 | American Samoa   | Female | 50-69 years      | 0.93 | 0.91 | 0.95 | 0 |
| 36 | American Samoa   | Female | 70+ years        | 0.75 | 0.72 | 0.78 | 0 |
| 37 | American Samoa   | Female | Age-standardized | 0.96 | 0.93 | 0.99 | 0 |
| 38 | American Samoa   | Both   | All Ages         | 1.61 | 1.59 | 1.63 | 0 |
| 39 | American Samoa   | Both   | 15-49 years      | 1.01 | 0.93 | 1.1  | 0 |
| 40 | American Samoa   | Both   | 50-69 years      | 0.8  | 0.78 | 0.81 | 0 |
| 41 | American Samoa   | Both   | 70+ years        | 0.66 | 0.64 | 0.67 | 0 |
| 42 | American Samoa   | Both   | Age-standardized | 0.89 | 0.86 | 0.93 | 0 |
| 43 | Poland           | Both   | Age-standardized | 0.89 | 0.86 | 0.93 | 0 |
| 44 | Argentina        | Male   | All Ages         | 1.35 | 1.33 | 1.38 | 0 |
| 45 | Argentina        | Male   | 15-49 years      | 1.06 | 1.04 | 1.08 | 0 |
| 46 | Argentina        | Male   | 50-69 years      | 0.89 | 0.87 | 0.92 | 0 |
| 47 | Argentina        | Male   | 70+ years        | 0.59 | 0.57 | 0.61 | 0 |
| 48 | Argentina        | Male   | Age-standardized | 0.91 | 0.89 | 0.94 | 0 |
| 49 | Argentina        | Female | All Ages         | 1.52 | 1.5  | 1.55 | 0 |
| 50 | Argentina        | Female | 15-49 years      | 1.15 | 1.11 | 1.19 | 0 |
| 51 | Argentina        | Female | 50-69 years      | 1.08 | 1.06 | 1.1  | 0 |
| 52 | Argentina        | Female | 70+ years        | 0.98 | 0.95 | 1    | 0 |
| 53 | Argentina        | Female | Age-standardized | 1.07 | 1.05 | 1.08 | 0 |
| 54 | Argentina        | Both   | All Ages         | 1.41 | 1.38 | 1.43 | 0 |
| 55 | Argentina        | Both   | 15-49 years      | 1.09 | 1.06 | 1.11 | 0 |
| 56 | Argentina        | Both   | 50-69 years      | 0.97 | 0.95 | 0.99 | 0 |
| 57 | Argentina        | Both   | 70+ years        | 0.74 | 0.73 | 0.76 | 0 |
| 58 | Argentina        | Both   | Age-standardized | 0.89 | 0.86 | 0.92 | 0 |
| 59 | Marshall Islands | Both   | Age-standardized | 0.89 | 0.86 | 0.92 | 0 |
| 60 | United States    | Male   | All Ages         | 1.79 | 1.68 | 1.9  | 0 |

|    |               |        |                  |      |      |      |   |
|----|---------------|--------|------------------|------|------|------|---|
| 1  |               |        |                  |      |      |      |   |
| 2  | United States | Male   | 15-49 years      | 1.47 | 1.31 | 1.62 | 0 |
| 3  | United States | Male   | 50-69 years      | 1.34 | 1.23 | 1.44 | 0 |
| 4  | United States | Male   | 70+ years        | 1.01 | 0.91 | 1.1  | 0 |
| 5  | United States | Male   | Age-standardized | 1.4  | 1.27 | 1.53 | 0 |
| 6  | United States | Female | All Ages         | 1.24 | 1.17 | 1.31 | 0 |
| 7  | United States | Female | 15-49 years      | 0.99 | 0.85 | 1.14 | 0 |
| 8  | United States | Female | 50-69 years      | 0.78 | 0.74 | 0.83 | 0 |
| 9  | United States | Female | 70+ years        | 0.74 | 0.62 | 0.86 | 0 |
| 10 | United States | Female | Age-standardized | 0.93 | 0.82 | 1.05 | 0 |
| 11 | United States | Both   | All Ages         | 1.56 | 1.46 | 1.65 | 0 |
| 12 | United States | Both   | 15-49 years      | 1.29 | 1.14 | 1.44 | 0 |
| 13 | United States | Both   | 50-69 years      | 1.11 | 1.03 | 1.19 | 0 |
| 14 | United States | Both   | 70+ years        | 0.88 | 0.78 | 0.99 | 0 |
| 15 | United States | Both   | Age-standardized | 0.89 | 0.87 | 0.91 | 0 |
| 16 | Tunisia       | Both   | Age-standardized | 0.89 | 0.87 | 0.91 | 0 |
| 17 | Pakistan      | Male   | All Ages         | 1.33 | 1.24 | 1.42 | 0 |
| 18 | Pakistan      | Male   | 15-49 years      | 1.06 | 1.02 | 1.09 | 0 |
| 19 | Pakistan      | Male   | 50-69 years      | 0.88 | 0.86 | 0.91 | 0 |
| 20 | Pakistan      | Male   | 70+ years        | 0.98 | 0.94 | 1.02 | 0 |
| 21 | Pakistan      | Male   | Age-standardized | 0.94 | 0.91 | 0.97 | 0 |
| 22 | Pakistan      | Female | All Ages         | 1.56 | 1.45 | 1.68 | 0 |
| 23 | Pakistan      | Female | 15-49 years      | 1.13 | 1.08 | 1.18 | 0 |
| 24 | Pakistan      | Female | 50-69 years      | 0.99 | 0.94 | 1.04 | 0 |
| 25 | Pakistan      | Female | 70+ years        | 1.17 | 1.13 | 1.22 | 0 |
| 26 | Pakistan      | Female | Age-standardized | 1.03 | 0.99 | 1.07 | 0 |
| 27 | Pakistan      | Both   | All Ages         | 1.4  | 1.3  | 1.5  | 0 |
| 28 | Pakistan      | Both   | 15-49 years      | 1.06 | 1.02 | 1.09 | 0 |
| 29 | Pakistan      | Both   | 50-69 years      | 0.9  | 0.87 | 0.94 | 0 |
| 30 | Pakistan      | Both   | 70+ years        | 0.98 | 0.93 | 1.02 | 0 |
| 31 | Pakistan      | Both   | Age-standardized | 0.88 | 0.81 | 0.94 | 0 |
| 32 | China         | Both   | Age-standardized | 0.88 | 0.81 | 0.94 | 0 |
| 33 | South Africa  | Male   | All Ages         | 1.49 | 1.42 | 1.56 | 0 |
| 34 | South Africa  | Male   | 15-49 years      | 0.96 | 0.89 | 1.04 | 0 |
| 35 | South Africa  | Male   | 50-69 years      | 0.66 | 0.63 | 0.69 | 0 |
| 36 | South Africa  | Male   | 70+ years        | 0.59 | 0.56 | 0.62 | 0 |
| 37 | South Africa  | Male   | Age-standardized | 0.72 | 0.69 | 0.75 | 0 |
| 38 | South Africa  | Female | All Ages         | 1.38 | 1.33 | 1.43 | 0 |
| 39 | South Africa  | Female | 15-49 years      | 0.81 | 0.75 | 0.87 | 0 |
| 40 | South Africa  | Female | 50-69 years      | 0.55 | 0.5  | 0.6  | 0 |
| 41 | South Africa  | Female | 70+ years        | 0.7  | 0.67 | 0.73 | 0 |
| 42 | South Africa  | Female | Age-standardized | 0.58 | 0.54 | 0.62 | 0 |
| 43 | South Africa  | Both   | All Ages         | 1.48 | 1.41 | 1.56 | 0 |
| 44 | South Africa  | Both   | 15-49 years      | 0.98 | 0.9  | 1.06 | 0 |
| 45 | South Africa  | Both   | 50-69 years      | 0.64 | 0.61 | 0.68 | 0 |
| 46 | South Africa  | Both   | 70+ years        | 0.5  | 0.43 | 0.56 | 0 |
| 47 | South Africa  | Both   | Age-standardized | 0.88 | 0.83 | 0.92 | 0 |
| 48 | Costa Rica    | Both   | Age-standardized | 0.88 | 0.83 | 0.92 | 0 |
| 49 | Philippines   | Male   | All Ages         | 1.56 | 1.51 | 1.62 | 0 |
| 50 | Philippines   | Male   | 15-49 years      | 0.97 | 0.87 | 1.06 | 0 |
| 51 | Philippines   | Male   | 50-69 years      | 0.77 | 0.7  | 0.85 | 0 |
| 52 | Philippines   | Male   | 70+ years        | 0.7  | 0.62 | 0.79 | 0 |
| 53 | Philippines   | Male   | Age-standardized | 0.76 | 0.69 | 0.84 | 0 |
| 54 | Philippines   | Female | All Ages         | 1.56 | 1.49 | 1.63 | 0 |
| 55 | Philippines   | Female | 15-49 years      | 0.87 | 0.76 | 0.98 | 0 |
| 56 | Philippines   | Female | 50-69 years      | 0.73 | 0.63 | 0.83 | 0 |
| 57 | Philippines   | Female | 70+ years        | 0.63 | 0.54 | 0.72 | 0 |
| 58 | Philippines   | Female | Age-standardized | 0.67 | 0.57 | 0.76 | 0 |
| 59 | Philippines   | Both   | All Ages         | 1.57 | 1.51 | 1.62 | 0 |
| 60 | Philippines   | Both   | 15-49 years      | 0.94 | 0.84 | 1.04 | 0 |

|    |             |        |                  |      |       |      |       |
|----|-------------|--------|------------------|------|-------|------|-------|
| 1  |             |        |                  |      |       |      |       |
| 2  | Philippines | Both   | 50-69 years      | 0.75 | 0.67  | 0.83 | 0     |
| 3  | Philippines | Both   | 70+ years        | 0.6  | 0.51  | 0.69 | 0     |
| 4  | Liberia     | Both   | Age-standardized | 0.87 | 0.72  | 1.02 | 0     |
| 5  | Cameroon    | Male   | All Ages         | 0.86 | 0.8   | 0.91 | 0     |
| 6  | Cameroon    | Male   | 15-49 years      | 0.73 | 0.7   | 0.76 | 0     |
| 7  | Cameroon    | Male   | 50-69 years      | 0.65 | 0.63  | 0.66 | 0     |
| 8  | Cameroon    | Male   | 70+ years        | 0.67 | 0.65  | 0.69 | 0     |
| 9  | Cameroon    | Male   | Age-standardized | 0.68 | 0.67  | 0.7  | 0     |
| 10 | Cameroon    | Female | All Ages         | 0.64 | 0.57  | 0.71 | 0     |
| 11 | Cameroon    | Female | 15-49 years      | 0.58 | 0.54  | 0.62 | 0     |
| 12 | Cameroon    | Female | 50-69 years      | 0.51 | 0.47  | 0.55 | 0     |
| 13 | Cameroon    | Female | 70+ years        | 0.69 | 0.65  | 0.73 | 0     |
| 14 | Cameroon    | Female | Age-standardized | 0.57 | 0.53  | 0.61 | 0     |
| 15 | Cameroon    | Both   | All Ages         | 0.78 | 0.73  | 0.84 | 0     |
| 16 | Cameroon    | Both   | 15-49 years      | 0.71 | 0.68  | 0.74 | 0     |
| 17 | Cameroon    | Both   | 50-69 years      | 0.62 | 0.6   | 0.63 | 0     |
| 18 | Cameroon    | Both   | 70+ years        | 0.63 | 0.61  | 0.66 | 0     |
| 19 | Cameroon    | Both   | Age-standardized | 0.87 | 0.82  | 0.92 | 0     |
| 20 | Georgia     | Both   | Age-standardized | 0.87 | 0.82  | 0.92 | 0     |
| 21 | Kyrgyzstan  | Male   | All Ages         | 0.98 | 0.89  | 1.07 | 0     |
| 22 | Kyrgyzstan  | Male   | 15-49 years      | 0.69 | 0.58  | 0.8  | 0     |
| 23 | Kyrgyzstan  | Male   | 50-69 years      | 0.01 | -0.11 | 0.14 | 0.847 |
| 24 | Kyrgyzstan  | Male   | 70+ years        | 0.58 | 0.56  | 0.59 | 0     |
| 25 | Kyrgyzstan  | Male   | Age-standardized | 0.47 | 0.38  | 0.56 | 0     |
| 26 | Kyrgyzstan  | Female | All Ages         | 0.92 | 0.8   | 1.04 | 0     |
| 27 | Kyrgyzstan  | Female | 15-49 years      | 0.7  | 0.61  | 0.79 | 0     |
| 28 | Kyrgyzstan  | Female | 50-69 years      | 0.21 | 0.1   | 0.32 | 0.001 |
| 29 | Kyrgyzstan  | Female | 70+ years        | 0.86 | 0.78  | 0.95 | 0     |
| 30 | Kyrgyzstan  | Female | Age-standardized | 0.63 | 0.53  | 0.73 | 0     |
| 31 | Kyrgyzstan  | Both   | All Ages         | 0.96 | 0.86  | 1.06 | 0     |
| 32 | Kyrgyzstan  | Both   | 15-49 years      | 0.69 | 0.59  | 0.8  | 0     |
| 33 | Kyrgyzstan  | Both   | 50-69 years      | 0.11 | -0.01 | 0.23 | 0.072 |
| 34 | Kyrgyzstan  | Both   | 70+ years        | 0.88 | 0.84  | 0.92 | 0     |
| 35 | Kyrgyzstan  | Both   | Age-standardized | 0.86 | 0.81  | 0.91 | 0     |
| 36 | Macedonia   | Both   | Age-standardized | 0.86 | 0.81  | 0.91 | 0     |
| 37 | Chad        | Male   | All Ages         | 0.3  | 0.29  | 0.32 | 0     |
| 38 | Chad        | Male   | 15-49 years      | 0.57 | 0.53  | 0.6  | 0     |
| 39 | Chad        | Male   | 50-69 years      | 0.55 | 0.54  | 0.57 | 0     |
| 40 | Chad        | Male   | 70+ years        | 0.63 | 0.62  | 0.65 | 0     |
| 41 | Chad        | Male   | Age-standardized | 0.59 | 0.58  | 0.61 | 0     |
| 42 | Chad        | Female | All Ages         | 0.1  | 0.06  | 0.14 | 0     |
| 43 | Chad        | Female | 15-49 years      | 0.57 | 0.54  | 0.59 | 0     |
| 44 | Chad        | Female | 50-69 years      | 0.55 | 0.53  | 0.58 | 0     |
| 45 | Chad        | Female | 70+ years        | 0.7  | 0.69  | 0.71 | 0     |
| 46 | Chad        | Female | Age-standardized | 0.64 | 0.61  | 0.66 | 0     |
| 47 | Chad        | Both   | All Ages         | 0.24 | 0.22  | 0.26 | 0     |
| 48 | Chad        | Both   | 15-49 years      | 0.58 | 0.56  | 0.61 | 0     |
| 49 | Chad        | Both   | 50-69 years      | 0.7  | 0.69  | 0.72 | 0     |
| 50 | Chad        | Both   | 70+ years        | 0.75 | 0.74  | 0.76 | 0     |
| 51 | Chad        | Both   | Age-standardized | 0.85 | 0.79  | 0.9  | 0     |
| 52 | Lithuania   | Both   | Age-standardized | 0.85 | 0.79  | 0.9  | 0     |
| 53 | Uganda      | Male   | All Ages         | 0.67 | 0.51  | 0.82 | 0     |
| 54 | Uganda      | Male   | 15-49 years      | 0.8  | 0.73  | 0.86 | 0     |
| 55 | Uganda      | Male   | 50-69 years      | 0.69 | 0.66  | 0.72 | 0     |
| 56 | Uganda      | Male   | 70+ years        | 0.79 | 0.73  | 0.84 | 0     |
| 57 | Uganda      | Male   | Age-standardized | 0.78 | 0.74  | 0.83 | 0     |
| 58 | Uganda      | Female | All Ages         | 0.4  | 0.26  | 0.55 | 0     |
| 59 | Uganda      | Female | 15-49 years      | 0.29 | 0.24  | 0.35 | 0     |
| 60 | Uganda      | Female | 50-69 years      | 0.1  | 0.09  | 0.12 | 0     |



|    |                |        |                  |      |       |      |       |
|----|----------------|--------|------------------|------|-------|------|-------|
| 1  |                |        |                  |      |       |      |       |
| 2  | Uganda         | Female | 70+ years        | 0.28 | 0.24  | 0.32 | 0     |
| 3  | Uganda         | Female | Age-standardized | 0.23 | 0.2   | 0.25 | 0     |
| 4  | Uganda         | Both   | All Ages         | 0.57 | 0.42  | 0.73 | 0     |
| 5  | Uganda         | Both   | 15-49 years      | 0.61 | 0.55  | 0.68 | 0     |
| 6  | Uganda         | Both   | 50-69 years      | 0.37 | 0.35  | 0.4  | 0     |
| 7  | Uganda         | Both   | 70+ years        | 0.29 | 0.25  | 0.33 | 0     |
| 8  | Romania        | Both   | Age-standardized | 0.85 | 0.83  | 0.87 | 0     |
| 9  | Comoros        | Male   | All Ages         | 1.53 | 1.5   | 1.56 | 0     |
| 10 | Comoros        | Male   | 15-49 years      | 0.96 | 0.94  | 0.98 | 0     |
| 11 | Comoros        | Male   | 50-69 years      | 0.54 | 0.52  | 0.56 | 0     |
| 12 | Comoros        | Male   | 70+ years        | 0.57 | 0.54  | 0.6  | 0     |
| 13 | Comoros        | Male   | Age-standardized | 0.58 | 0.56  | 0.6  | 0     |
| 14 | Comoros        | Female | All Ages         | 1.03 | 0.99  | 1.08 | 0     |
| 15 | Comoros        | Female | 15-49 years      | 0.38 | 0.37  | 0.4  | 0     |
| 16 | Comoros        | Female | 50-69 years      | 0.04 | 0.01  | 0.07 | 0.008 |
| 17 | Comoros        | Female | 70+ years        | 0.19 | 0.16  | 0.21 | 0     |
| 18 | Comoros        | Female | Age-standardized | 0.1  | 0.07  | 0.13 | 0     |
| 19 | Comoros        | Both   | All Ages         | 1.35 | 1.32  | 1.38 | 0     |
| 20 | Comoros        | Both   | 15-49 years      | 0.79 | 0.78  | 0.8  | 0     |
| 21 | Comoros        | Both   | 50-69 years      | 0.28 | 0.24  | 0.32 | 0     |
| 22 | Comoros        | Both   | 70+ years        | 0.28 | 0.26  | 0.3  | 0     |
| 23 | American Samoa | Both   | Age-standardized | 0.84 | 0.82  | 0.86 | 0     |
| 24 | Nigeria        | Male   | All Ages         | 0.07 | -0.02 | 0.15 | 0.127 |
| 25 | Nigeria        | Male   | 15-49 years      | 0.52 | 0.44  | 0.6  | 0     |
| 26 | Nigeria        | Male   | 50-69 years      | 0.56 | 0.49  | 0.63 | 0     |
| 27 | Nigeria        | Male   | 70+ years        | 0.54 | 0.46  | 0.63 | 0     |
| 28 | Nigeria        | Male   | Age-standardized | 0.6  | 0.52  | 0.68 | 0     |
| 29 | Nigeria        | Female | All Ages         | 0.25 | 0.1   | 0.41 | 0.002 |
| 30 | Nigeria        | Female | 15-49 years      | 0.38 | 0.22  | 0.54 | 0     |
| 31 | Nigeria        | Female | 50-69 years      | 0.15 | 0.02  | 0.28 | 0.029 |
| 32 | Nigeria        | Female | 70+ years        | 0.28 | 0.13  | 0.42 | 0.001 |
| 33 | Nigeria        | Female | Age-standardized | 0.23 | 0.09  | 0.37 | 0.002 |
| 34 | Nigeria        | Both   | All Ages         | 0.09 | -0.03 | 0.21 | 0.133 |
| 35 | Nigeria        | Both   | 15-49 years      | 0.41 | 0.3   | 0.52 | 0     |
| 36 | Nigeria        | Both   | 50-69 years      | 0.14 | 0.01  | 0.27 | 0.04  |
| 37 | Nigeria        | Both   | 70+ years        | 0.59 | 0.45  | 0.74 | 0     |
| 38 | South Korea    | Both   | Age-standardized | 0.84 | 0.8   | 0.88 | 0     |
| 39 | Middle SDI     | Male   | All Ages         | 2.03 | 2.01  | 2.04 | 0     |
| 40 | Middle SDI     | Male   | 15-49 years      | 1.32 | 1.27  | 1.36 | 0     |
| 41 | Middle SDI     | Male   | 50-69 years      | 0.93 | 0.91  | 0.95 | 0     |
| 42 | Middle SDI     | Male   | 70+ years        | 0.74 | 0.72  | 0.77 | 0     |
| 43 | Middle SDI     | Male   | Age-standardized | 0.94 | 0.93  | 0.96 | 0     |
| 44 | Middle SDI     | Female | All Ages         | 2.17 | 2.14  | 2.2  | 0     |
| 45 | Middle SDI     | Female | 15-49 years      | 1.36 | 1.31  | 1.42 | 0     |
| 46 | Middle SDI     | Female | 50-69 years      | 1.01 | 0.98  | 1.04 | 0     |
| 47 | Middle SDI     | Female | 70+ years        | 0.91 | 0.88  | 0.94 | 0     |
| 48 | Middle SDI     | Female | Age-standardized | 0.97 | 0.94  | 0.99 | 0     |
| 49 | Middle SDI     | Both   | All Ages         | 2.08 | 2.06  | 2.09 | 0     |
| 50 | Middle SDI     | Both   | 15-49 years      | 1.33 | 1.28  | 1.38 | 0     |
| 51 | Middle SDI     | Both   | 50-69 years      | 0.95 | 0.92  | 0.97 | 0     |
| 52 | Middle SDI     | Both   | 70+ years        | 0.83 | 0.8   | 0.86 | 0     |
| 53 | Middle SDI     | Both   | Age-standardized | 0.94 | 0.92  | 0.96 | 0     |
| 54 | South Korea    | Male   | All Ages         | 1.94 | 1.9   | 1.99 | 0     |
| 55 | South Korea    | Male   | 15-49 years      | 1.06 | 0.97  | 1.15 | 0     |
| 56 | South Korea    | Male   | 50-69 years      | 0.71 | 0.66  | 0.76 | 0     |
| 57 | South Korea    | Male   | 70+ years        | 0.48 | 0.45  | 0.5  | 0     |

|    |             |        |                  |      |      |      |   |
|----|-------------|--------|------------------|------|------|------|---|
| 1  |             |        |                  |      |      |      |   |
| 2  | South Korea | Male   | Age-standardized | 0.69 | 0.65 | 0.73 | 0 |
| 3  | South Korea | Female | All Ages         | 2.44 | 2.37 | 2.51 | 0 |
| 4  | South Korea | Female | 15-49 years      | 1.29 | 1.19 | 1.4  | 0 |
| 5  | South Korea | Female | 50-69 years      | 0.97 | 0.89 | 1.06 | 0 |
| 6  | South Korea | Female | 70+ years        | 0.94 | 0.87 | 1.01 | 0 |
| 7  | South Korea | Female | Age-standardized | 0.96 | 0.9  | 1.02 | 0 |
| 8  | South Korea | Both   | All Ages         | 2.1  | 2.05 | 2.15 | 0 |
| 9  | South Korea | Both   | 15-49 years      | 1.14 | 1.06 | 1.23 | 0 |
| 10 | South Korea | Both   | 50-69 years      | 0.89 | 0.82 | 0.96 | 0 |
| 11 | South Korea | Both   | 70+ years        | 0.82 | 0.78 | 0.86 | 0 |
| 12 | Sri Lanka   | Both   | Age-standardized | 0.84 | 0.79 | 0.88 | 0 |
| 13 | Greenland   | Male   | All Ages         | 1.55 | 1.5  | 1.61 | 0 |
| 14 | Greenland   | Male   | 15-49 years      | 0.86 | 0.77 | 0.95 | 0 |
| 15 | Greenland   | Male   | 50-69 years      | 0.92 | 0.86 | 0.98 | 0 |
| 16 | Greenland   | Male   | 70+ years        | 0.65 | 0.6  | 0.69 | 0 |
| 17 | Greenland   | Male   | Age-standardized | 0.87 | 0.82 | 0.92 | 0 |
| 18 | Greenland   | Female | All Ages         | 1.48 | 1.41 | 1.54 | 0 |
| 19 | Greenland   | Female | 15-49 years      | 0.62 | 0.57 | 0.67 | 0 |
| 20 | Greenland   | Female | 50-69 years      | 0.62 | 0.57 | 0.67 | 0 |
| 21 | Greenland   | Female | 70+ years        | 0.69 | 0.63 | 0.75 | 0 |
| 22 | Greenland   | Female | Age-standardized | 0.65 | 0.62 | 0.69 | 0 |
| 23 | Greenland   | Both   | All Ages         | 1.5  | 1.45 | 1.56 | 0 |
| 24 | Greenland   | Both   | 15-49 years      | 0.69 | 0.62 | 0.77 | 0 |
| 25 | Greenland   | Both   | 50-69 years      | 0.87 | 0.8  | 0.95 | 0 |
| 26 | Greenland   | Both   | 70+ years        | 0.81 | 0.75 | 0.86 | 0 |
| 27 | Lesotho     | Both   | Age-standardized | 0.83 | 0.82 | 0.85 | 0 |
| 28 | Chile       | Male   | All Ages         | 2.04 | 1.9  | 2.18 | 0 |
| 29 | Chile       | Male   | 15-49 years      | 1.31 | 1.15 | 1.47 | 0 |
| 30 | Chile       | Male   | 50-69 years      | 1.05 | 0.94 | 1.16 | 0 |
| 31 | Chile       | Male   | 70+ years        | 0.79 | 0.68 | 0.9  | 0 |
| 32 | Chile       | Male   | Age-standardized | 1.08 | 0.97 | 1.2  | 0 |
| 33 | Chile       | Female | All Ages         | 2.24 | 2.15 | 2.33 | 0 |
| 34 | Chile       | Female | 15-49 years      | 1.41 | 1.29 | 1.53 | 0 |
| 35 | Chile       | Female | 50-69 years      | 1.17 | 1.09 | 1.24 | 0 |
| 36 | Chile       | Female | 70+ years        | 1.08 | 1    | 1.16 | 0 |
| 37 | Chile       | Female | Age-standardized | 1.2  | 1.12 | 1.28 | 0 |
| 38 | Chile       | Both   | All Ages         | 2.11 | 1.99 | 2.23 | 0 |
| 39 | Chile       | Both   | 15-49 years      | 1.36 | 1.21 | 1.5  | 0 |
| 40 | Chile       | Both   | 50-69 years      | 1.11 | 1.01 | 1.21 | 0 |
| 41 | Chile       | Both   | 70+ years        | 0.94 | 0.85 | 1.03 | 0 |
| 42 | Cambodia    | Both   | Age-standardized | 0.83 | 0.81 | 0.86 | 0 |
| 43 | Congo       | Male   | All Ages         | 1.5  | 1.46 | 1.55 | 0 |
| 44 | Congo       | Male   | 15-49 years      | 1.17 | 1.11 | 1.23 | 0 |
| 45 | Congo       | Male   | 50-69 years      | 0.66 | 0.62 | 0.69 | 0 |
| 46 | Congo       | Male   | 70+ years        | 0.67 | 0.63 | 0.7  | 0 |
| 47 | Congo       | Male   | Age-standardized | 0.71 | 0.68 | 0.75 | 0 |
| 48 | Congo       | Female | All Ages         | 0.97 | 0.91 | 1.03 | 0 |
| 49 | Congo       | Female | 15-49 years      | 0.74 | 0.68 | 0.8  | 0 |
| 50 | Congo       | Female | 50-69 years      | 0.33 | 0.28 | 0.37 | 0 |
| 51 | Congo       | Female | 70+ years        | 0.52 | 0.48 | 0.56 | 0 |
| 52 | Congo       | Female | Age-standardized | 0.42 | 0.38 | 0.45 | 0 |
| 53 | Congo       | Both   | All Ages         | 1.31 | 1.26 | 1.35 | 0 |
| 54 | Congo       | Both   | 15-49 years      | 1.01 | 0.97 | 1.06 | 0 |
| 55 | Congo       | Both   | 50-69 years      | 0.6  | 0.56 | 0.63 | 0 |
| 56 | Congo       | Both   | 70+ years        | 0.64 | 0.59 | 0.68 | 0 |
| 57 | Andorra     | Both   | Age-standardized | 0.82 | 0.71 | 0.92 | 0 |



|    |                      |        |                  |      |      |      |       |
|----|----------------------|--------|------------------|------|------|------|-------|
| 1  |                      |        |                  |      |      |      |       |
| 2  | Kazakhstan           | Male   | All Ages         | 1.06 | 1.02 | 1.09 | 0     |
| 3  | Kazakhstan           | Male   | 15-49 years      | 0.73 | 0.58 | 0.87 | 0     |
| 4  | Kazakhstan           | Male   | 50-69 years      | 0.19 | 0.08 | 0.3  | 0.002 |
| 5  | Kazakhstan           | Male   | 70+ years        | 0.45 | 0.39 | 0.5  | 0     |
| 6  | Kazakhstan           | Male   | Age-standardized | 0.44 | 0.34 | 0.55 | 0     |
| 7  | Kazakhstan           | Female | All Ages         | 0.85 | 0.79 | 0.9  | 0     |
| 8  | Kazakhstan           | Female | 15-49 years      | 0.48 | 0.36 | 0.6  | 0     |
| 9  | Kazakhstan           | Female | 50-69 years      | 0.19 | 0.07 | 0.3  | 0.003 |
| 10 | Kazakhstan           | Female | 70+ years        | 0.59 | 0.44 | 0.73 | 0     |
| 11 | Kazakhstan           | Female | Age-standardized | 0.38 | 0.27 | 0.5  | 0     |
| 12 | Kazakhstan           | Both   | All Ages         | 0.97 | 0.92 | 1.02 | 0     |
| 13 | Kazakhstan           | Both   | 15-49 years      | 0.63 | 0.49 | 0.77 | 0     |
| 14 | Kazakhstan           | Both   | 50-69 years      | 0.2  | 0.08 | 0.31 | 0.002 |
| 15 | Kazakhstan           | Both   | 70+ years        | 0.67 | 0.59 | 0.75 | 0     |
| 16 | Kazakhstan           | Both   | Age-standardized | 0.81 | 0.73 | 0.88 | 0     |
| 17 | Croatia              | Both   | Age-standardized | 0.81 | 0.73 | 0.88 | 0     |
| 18 | Madagascar           | Male   | All Ages         | 0.57 | 0.49 | 0.64 | 0     |
| 19 | Madagascar           | Male   | 15-49 years      | 0.56 | 0.53 | 0.59 | 0     |
| 20 | Madagascar           | Male   | 50-69 years      | 0.4  | 0.36 | 0.43 | 0     |
| 21 | Madagascar           | Male   | 70+ years        | 0.54 | 0.5  | 0.58 | 0     |
| 22 | Madagascar           | Male   | Age-standardized | 0.49 | 0.45 | 0.53 | 0     |
| 23 | Madagascar           | Female | All Ages         | 0.44 | 0.35 | 0.53 | 0     |
| 24 | Madagascar           | Female | 15-49 years      | 0.36 | 0.33 | 0.4  | 0     |
| 25 | Madagascar           | Female | 50-69 years      | 0.15 | 0.1  | 0.21 | 0     |
| 26 | Madagascar           | Female | 70+ years        | 0.36 | 0.31 | 0.41 | 0     |
| 27 | Madagascar           | Female | Age-standardized | 0.26 | 0.21 | 0.31 | 0     |
| 28 | Madagascar           | Both   | All Ages         | 0.52 | 0.44 | 0.6  | 0     |
| 29 | Madagascar           | Both   | 15-49 years      | 0.49 | 0.46 | 0.52 | 0     |
| 30 | Madagascar           | Both   | 50-69 years      | 0.31 | 0.26 | 0.36 | 0     |
| 31 | Madagascar           | Both   | 70+ years        | 0.27 | 0.22 | 0.31 | 0     |
| 32 | Madagascar           | Both   | Age-standardized | 0.8  | 0.73 | 0.87 | 0     |
| 33 | Virgin Islands, U.S. | Both   | Age-standardized | 0.8  | 0.73 | 0.87 | 0     |
| 34 | Slovenia             | Male   | All Ages         | 1.69 | 1.6  | 1.77 | 0     |
| 35 | Slovenia             | Male   | 15-49 years      | 1.17 | 1.12 | 1.21 | 0     |
| 36 | Slovenia             | Male   | 50-69 years      | 0.52 | 0.44 | 0.59 | 0     |
| 37 | Slovenia             | Male   | 70+ years        | 0.67 | 0.56 | 0.78 | 0     |
| 38 | Slovenia             | Male   | Age-standardized | 0.74 | 0.7  | 0.78 | 0     |
| 39 | Slovenia             | Female | All Ages         | 2.13 | 2.01 | 2.24 | 0     |
| 40 | Slovenia             | Female | 15-49 years      | 1.45 | 1.39 | 1.5  | 0     |
| 41 | Slovenia             | Female | 50-69 years      | 1.3  | 1.19 | 1.41 | 0     |
| 42 | Slovenia             | Female | 70+ years        | 1.31 | 1.18 | 1.43 | 0     |
| 43 | Slovenia             | Female | Age-standardized | 1.3  | 1.24 | 1.36 | 0     |
| 44 | Slovenia             | Both   | All Ages         | 1.88 | 1.78 | 1.98 | 0     |
| 45 | Slovenia             | Both   | 15-49 years      | 1.28 | 1.24 | 1.32 | 0     |
| 46 | Slovenia             | Both   | 50-69 years      | 0.93 | 0.84 | 1.03 | 0     |
| 47 | Slovenia             | Both   | 70+ years        | 1.14 | 1.02 | 1.26 | 0     |
| 48 | Slovenia             | Both   | Age-standardized | 0.78 | 0.74 | 0.82 | 0     |
| 49 | Albania              | Both   | Age-standardized | 0.78 | 0.74 | 0.82 | 0     |
| 50 | Saudi Arabia         | Male   | All Ages         | 2.54 | 2.48 | 2.59 | 0     |
| 51 | Saudi Arabia         | Male   | 15-49 years      | 1.57 | 1.49 | 1.64 | 0     |
| 52 | Saudi Arabia         | Male   | 50-69 years      | 1.03 | 0.98 | 1.08 | 0     |
| 53 | Saudi Arabia         | Male   | 70+ years        | 0.88 | 0.83 | 0.94 | 0     |
| 54 | Saudi Arabia         | Male   | Age-standardized | 1.13 | 1.07 | 1.2  | 0     |
| 55 | Saudi Arabia         | Female | All Ages         | 3.35 | 3.24 | 3.46 | 0     |
| 56 | Saudi Arabia         | Female | 15-49 years      | 2.02 | 1.9  | 2.15 | 0     |
| 57 | Saudi Arabia         | Female | 50-69 years      | 1.45 | 1.31 | 1.59 | 0     |
| 58 | Saudi Arabia         | Female | 70+ years        | 1.31 | 1.15 | 1.46 | 0     |
| 59 | Saudi Arabia         | Female | Age-standardized | 1.49 | 1.35 | 1.63 | 0     |
| 60 | Saudi Arabia         | Both   | All Ages         | 2.83 | 2.77 | 2.89 | 0     |

|    |              |        |                  |      |      |      |   |
|----|--------------|--------|------------------|------|------|------|---|
| 1  |              |        |                  |      |      |      |   |
| 2  | Saudi Arabia | Both   | 15-49 years      | 1.7  | 1.61 | 1.78 | 0 |
| 3  | Saudi Arabia | Both   | 50-69 years      | 1.16 | 1.09 | 1.23 | 0 |
| 4  | Saudi Arabia | Both   | 70+ years        | 1.08 | 1    | 1.15 | 0 |
| 5  | Italy        | Both   | Age-standardized | 0.78 | 0.68 | 0.89 | 0 |
| 6  | Saint Lucia  | Male   | All Ages         | 2.65 | 2.55 | 2.74 | 0 |
| 7  | Saint Lucia  | Male   | 15-49 years      | 1.62 | 1.51 | 1.73 | 0 |
| 8  | Saint Lucia  | Male   | 50-69 years      | 0.92 | 0.84 | 0.99 | 0 |
| 9  | Saint Lucia  | Male   | 70+ years        | 0.66 | 0.6  | 0.73 | 0 |
| 10 | Saint Lucia  | Male   | Age-standardized | 1.02 | 0.94 | 1.1  | 0 |
| 11 | Saint Lucia  | Female | All Ages         | 2.61 | 2.48 | 2.73 | 0 |
| 12 | Saint Lucia  | Female | 15-49 years      | 1.67 | 1.51 | 1.82 | 0 |
| 13 | Saint Lucia  | Female | 50-69 years      | 0.97 | 0.84 | 1.11 | 0 |
| 14 | Saint Lucia  | Female | 70+ years        | 0.87 | 0.72 | 1.02 | 0 |
| 15 | Saint Lucia  | Female | Age-standardized | 1.05 | 0.92 | 1.19 | 0 |
| 16 | Saint Lucia  | Both   | All Ages         | 2.65 | 2.54 | 2.75 | 0 |
| 17 | Saint Lucia  | Both   | 15-49 years      | 1.66 | 1.53 | 1.79 | 0 |
| 18 | Saint Lucia  | Both   | 50-69 years      | 1    | 0.89 | 1.1  | 0 |
| 19 | Saint Lucia  | Both   | 70+ years        | 0.8  | 0.7  | 0.91 | 0 |
| 20 | Saint Lucia  | Both   | Age-standardized | 0.78 | 0.73 | 0.84 | 0 |
| 21 | Ecuador      | Both   | Age-standardized | 0.78 | 0.73 | 0.84 | 0 |
| 22 | Global       | Male   | All Ages         | 1.69 | 1.68 | 1.7  | 0 |
| 23 | Global       | Male   | 15-49 years      | 1.23 | 1.2  | 1.26 | 0 |
| 24 | Global       | Male   | 50-69 years      | 0.99 | 0.97 | 1.01 | 0 |
| 25 | Global       | Male   | 70+ years        | 0.77 | 0.75 | 0.8  | 0 |
| 26 | Global       | Male   | Age-standardized | 1    | 0.99 | 1.02 | 0 |
| 27 | Global       | Female | All Ages         | 1.82 | 1.8  | 1.83 | 0 |
| 28 | Global       | Female | 15-49 years      | 1.3  | 1.26 | 1.34 | 0 |
| 29 | Global       | Female | 50-69 years      | 1.18 | 1.16 | 1.2  | 0 |
| 30 | Global       | Female | 70+ years        | 1    | 0.97 | 1.04 | 0 |
| 31 | Global       | Female | Age-standardized | 1.12 | 1.1  | 1.13 | 0 |
| 32 | Global       | Both   | All Ages         | 1.74 | 1.73 | 1.75 | 0 |
| 33 | Global       | Both   | 15-49 years      | 1.25 | 1.22 | 1.28 | 0 |
| 34 | Global       | Both   | 50-69 years      | 1.06 | 1.04 | 1.08 | 0 |
| 35 | Global       | Both   | 70+ years        | 0.93 | 0.89 | 0.96 | 0 |
| 36 | Global       | Both   | Age-standardized | 1.05 | 1.04 | 1.07 | 0 |
| 37 | Finland      | Male   | All Ages         | 2.19 | 2    | 2.38 | 0 |
| 38 | Finland      | Male   | 15-49 years      | 1.67 | 1.5  | 1.84 | 0 |
| 39 | Finland      | Male   | 50-69 years      | 1.75 | 1.6  | 1.91 | 0 |
| 40 | Finland      | Male   | 70+ years        | 1.49 | 1.33 | 1.65 | 0 |
| 41 | Finland      | Male   | Age-standardized | 1.73 | 1.56 | 1.9  | 0 |
| 42 | Finland      | Female | All Ages         | 1.92 | 1.8  | 2.03 | 0 |
| 43 | Finland      | Female | 15-49 years      | 1.41 | 1.31 | 1.51 | 0 |
| 44 | Finland      | Female | 50-69 years      | 1.53 | 1.43 | 1.62 | 0 |
| 45 | Finland      | Female | 70+ years        | 1.33 | 1.21 | 1.44 | 0 |
| 46 | Finland      | Female | Age-standardized | 1.49 | 1.37 | 1.6  | 0 |
| 47 | Finland      | Both   | All Ages         | 2.12 | 1.96 | 2.28 | 0 |
| 48 | Finland      | Both   | 15-49 years      | 1.61 | 1.46 | 1.75 | 0 |
| 49 | Finland      | Both   | 50-69 years      | 1.74 | 1.59 | 1.89 | 0 |
| 50 | Finland      | Both   | 70+ years        | 1.65 | 1.51 | 1.79 | 0 |
| 51 | Finland      | Both   | Age-standardized | 0.78 | 0.71 | 0.86 | 0 |
| 52 | Fiji         | Both   | Age-standardized | 0.78 | 0.71 | 0.86 | 0 |
| 53 | Tunisia      | Male   | All Ages         | 2.2  | 2.18 | 2.22 | 0 |
| 54 | Tunisia      | Male   | 15-49 years      | 1.38 | 1.35 | 1.42 | 0 |
| 55 | Tunisia      | Male   | 50-69 years      | 0.83 | 0.81 | 0.86 | 0 |
| 56 | Tunisia      | Male   | 70+ years        | 0.63 | 0.62 | 0.65 | 0 |
| 57 | Tunisia      | Male   | Age-standardized | 0.86 | 0.84 | 0.88 | 0 |
| 58 | Tunisia      | Female | All Ages         | 2.45 | 2.43 | 2.48 | 0 |
| 59 | Tunisia      | Female | 15-49 years      | 1.55 | 1.5  | 1.6  | 0 |
| 60 | Tunisia      | Female | 15-49 years      | 1.55 | 1.5  | 1.6  | 0 |

|    |                       |        |                  |       |       |       |       |
|----|-----------------------|--------|------------------|-------|-------|-------|-------|
| 1  |                       |        |                  |       |       |       |       |
| 2  | Tunisia               | Female | 50-69 years      | 0.99  | 0.97  | 1.01  | 0     |
| 3  | Tunisia               | Female | 70+ years        | 0.83  | 0.82  | 0.84  | 0     |
| 4  | Tunisia               | Female | Age-standardized | 1.01  | 0.99  | 1.03  | 0     |
| 5  | Tunisia               | Both   | All Ages         | 2.28  | 2.27  | 2.3   | 0     |
| 6  | Tunisia               | Both   | 15-49 years      | 1.43  | 1.39  | 1.47  | 0     |
| 7  | Tunisia               | Both   | 50-69 years      | 0.88  | 0.86  | 0.91  | 0     |
| 8  | Tunisia               | Both   | 70+ years        | 0.62  | 0.61  | 0.63  | 0     |
| 9  | Greenland             | Both   | Age-standardized | 0.78  | 0.73  | 0.83  | 0     |
| 10 | Bulgaria              | Male   | All Ages         | 0.5   | 0.39  | 0.62  | 0     |
| 11 | Bulgaria              | Male   | 15-49 years      | 0.33  | 0.12  | 0.55  | 0.003 |
| 12 | Bulgaria              | Male   | 50-69 years      | -0.35 | -0.53 | -0.18 | 0     |
| 13 | Bulgaria              | Male   | 70+ years        | -0.16 | -0.24 | -0.07 | 0.001 |
| 14 | Bulgaria              | Male   | Age-standardized | -0.06 | -0.2  | 0.09  | 0.425 |
| 15 | Bulgaria              | Female | All Ages         | 1.2   | 1.08  | 1.32  | 0     |
| 16 | Bulgaria              | Female | 15-49 years      | 0.49  | 0.31  | 0.68  | 0     |
| 17 | Bulgaria              | Female | 50-69 years      | 0.38  | 0.17  | 0.59  | 0.001 |
| 18 | Bulgaria              | Female | 70+ years        | 0.34  | 0.19  | 0.48  | 0     |
| 19 | Bulgaria              | Female | Age-standardized | 0.33  | 0.18  | 0.48  | 0     |
| 20 | Bulgaria              | Both   | All Ages         | 0.77  | 0.65  | 0.89  | 0     |
| 21 | Bulgaria              | Both   | 15-49 years      | 0.42  | 0.22  | 0.63  | 0     |
| 22 | Bulgaria              | Both   | 50-69 years      | -0.06 | -0.26 | 0.14  | 0.543 |
| 23 | Bulgaria              | Both   | 70+ years        | 0.02  | -0.1  | 0.14  | 0.749 |
| 24 | Bulgaria              | Both   | Age-standardized | 0.11  | -0.05 | 0.26  | 0.171 |
| 25 | Cote d'Ivoire         | Male   | All Ages         | 1.7   | 1.55  | 1.85  | 0     |
| 26 | Cote d'Ivoire         | Male   | 15-49 years      | 1.39  | 1.26  | 1.51  | 0     |
| 27 | Cote d'Ivoire         | Male   | 50-69 years      | 1.14  | 1.02  | 1.27  | 0     |
| 28 | Cote d'Ivoire         | Male   | 70+ years        | 1.16  | 1     | 1.31  | 0     |
| 29 | Cote d'Ivoire         | Male   | Age-standardized | 1.2   | 1.06  | 1.34  | 0     |
| 30 | Cote d'Ivoire         | Female | All Ages         | 1.46  | 1.28  | 1.64  | 0     |
| 31 | Cote d'Ivoire         | Female | 15-49 years      | 1.06  | 0.92  | 1.2   | 0     |
| 32 | Cote d'Ivoire         | Female | 50-69 years      | 0.84  | 0.69  | 1     | 0     |
| 33 | Cote d'Ivoire         | Female | 70+ years        | 0.98  | 0.81  | 1.15  | 0     |
| 34 | Cote d'Ivoire         | Female | Age-standardized | 0.9   | 0.74  | 1.07  | 0     |
| 35 | Cote d'Ivoire         | Both   | All Ages         | 1.62  | 1.46  | 1.78  | 0     |
| 36 | Cote d'Ivoire         | Both   | 15-49 years      | 1.27  | 1.15  | 1.4   | 0     |
| 37 | Cote d'Ivoire         | Both   | 50-69 years      | 1.03  | 0.9   | 1.16  | 0     |
| 38 | Cote d'Ivoire         | Both   | 70+ years        | 1.02  | 0.86  | 1.18  | 0     |
| 39 | Sao Tome and Principe | Both   | Age-standardized | 0.78  | 0.75  | 0.81  | 0     |
| 40 | Cambodia              | Male   | All Ages         | 2.24  | 2.14  | 2.35  | 0     |
| 41 | Cambodia              | Male   | 15-49 years      | 0.97  | 0.91  | 1.03  | 0     |
| 42 | Cambodia              | Male   | 50-69 years      | 0.77  | 0.74  | 0.81  | 0     |
| 43 | Cambodia              | Male   | 70+ years        | 0.63  | 0.6   | 0.66  | 0     |
| 44 | Cambodia              | Male   | Age-standardized | 0.75  | 0.72  | 0.78  | 0     |
| 45 | Cambodia              | Female | All Ages         | 2.2   | 2.12  | 2.29  | 0     |
| 46 | Cambodia              | Female | 15-49 years      | 0.98  | 0.92  | 1.04  | 0     |
| 47 | Cambodia              | Female | 50-69 years      | 0.93  | 0.91  | 0.95  | 0     |
| 48 | Cambodia              | Female | 70+ years        | 0.79  | 0.76  | 0.82  | 0     |
| 49 | Cambodia              | Female | Age-standardized | 0.87  | 0.85  | 0.9   | 0     |
| 50 | Cambodia              | Both   | All Ages         | 2.23  | 2.14  | 2.32  | 0     |
| 51 | Cambodia              | Both   | 15-49 years      | 1.02  | 0.96  | 1.07  | 0     |
| 52 | Cambodia              | Both   | 50-69 years      | 0.85  | 0.82  | 0.87  | 0     |
| 53 | Cambodia              | Both   | 70+ years        | 0.68  | 0.66  | 0.7   | 0     |
| 54 | Barbados              | Both   | Age-standardized | 0.77  | 0.71  | 0.83  | 0     |
| 55 | The Bahamas           | Male   | All Ages         | 1.64  | 1.58  | 1.69  | 0     |
| 56 | The Bahamas           | Male   | 15-49 years      | 1.02  | 0.89  | 1.15  | 0     |
| 57 | The Bahamas           | Male   | 50-69 years      | 0.62  | 0.54  | 0.7   | 0     |

|    |                    |        |                  |      |      |      |   |
|----|--------------------|--------|------------------|------|------|------|---|
| 1  |                    |        |                  |      |      |      |   |
| 2  | The Bahamas        | Male   | 70+ years        | 0.45 | 0.4  | 0.5  | 0 |
| 3  | The Bahamas        | Male   | Age-standardized | 0.66 | 0.59 | 0.73 | 0 |
| 4  | The Bahamas        | Female | All Ages         | 1.59 | 1.55 | 1.63 | 0 |
| 5  | The Bahamas        | Female | 15-49 years      | 1.01 | 0.89 | 1.13 | 0 |
| 6  | The Bahamas        | Female | 50-69 years      | 0.62 | 0.56 | 0.68 | 0 |
| 7  | The Bahamas        | Female | 70+ years        | 0.53 | 0.49 | 0.58 | 0 |
| 8  | The Bahamas        | Female | Age-standardized | 0.65 | 0.59 | 0.7  | 0 |
| 9  | The Bahamas        | Both   | All Ages         | 1.61 | 1.56 | 1.65 | 0 |
| 10 | The Bahamas        | Both   | 15-49 years      | 1.01 | 0.89 | 1.13 | 0 |
| 11 | The Bahamas        | Both   | 50-69 years      | 0.62 | 0.55 | 0.69 | 0 |
| 12 | The Bahamas        | Both   | 70+ years        | 0.56 | 0.52 | 0.6  | 0 |
| 13 | Moldova            | Both   | Age-standardized | 0.75 | 0.62 | 0.89 | 0 |
| 14 | Papua New Guinea   | Male   | All Ages         | 1.26 | 1.21 | 1.31 | 0 |
| 15 | Papua New Guinea   | Male   | 15-49 years      | 1.01 | 0.99 | 1.04 | 0 |
| 16 | Papua New Guinea   | Male   | 50-69 years      | 0.89 | 0.85 | 0.92 | 0 |
| 17 | Papua New Guinea   | Male   | 70+ years        | 0.79 | 0.75 | 0.83 | 0 |
| 18 | Papua New Guinea   | Male   | Age-standardized | 0.9  | 0.87 | 0.93 | 0 |
| 19 | Papua New Guinea   | Female | All Ages         | 1.53 | 1.5  | 1.57 | 0 |
| 20 | Papua New Guinea   | Female | 15-49 years      | 1.31 | 1.27 | 1.36 | 0 |
| 21 | Papua New Guinea   | Female | 50-69 years      | 1.21 | 1.16 | 1.25 | 0 |
| 22 | Papua New Guinea   | Female | 70+ years        | 1.02 | 0.96 | 1.08 | 0 |
| 23 | Papua New Guinea   | Female | Age-standardized | 1.17 | 1.13 | 1.22 | 0 |
| 24 | Papua New Guinea   | Both   | All Ages         | 1.39 | 1.34 | 1.43 | 0 |
| 25 | Papua New Guinea   | Both   | 15-49 years      | 1.15 | 1.12 | 1.18 | 0 |
| 26 | Papua New Guinea   | Both   | 50-69 years      | 1.03 | 1    | 1.07 | 0 |
| 27 | Papua New Guinea   | Both   | 70+ years        | 0.91 | 0.86 | 0.95 | 0 |
| 28 | Ukraine            | Both   | Age-standardized | 0.73 | 0.65 | 0.82 | 0 |
| 29 | Yemen              | Male   | All Ages         | 2.02 | 1.96 | 2.08 | 0 |
| 30 | Yemen              | Male   | 15-49 years      | 1.37 | 1.25 | 1.49 | 0 |
| 31 | Yemen              | Male   | 50-69 years      | 1.2  | 1.17 | 1.23 | 0 |
| 32 | Yemen              | Male   | 70+ years        | 1    | 0.98 | 1.02 | 0 |
| 33 | Yemen              | Male   | Age-standardized | 1.17 | 1.14 | 1.19 | 0 |
| 34 | Yemen              | Female | All Ages         | 2.02 | 1.93 | 2.12 | 0 |
| 35 | Yemen              | Female | 15-49 years      | 1.4  | 1.28 | 1.51 | 0 |
| 36 | Yemen              | Female | 50-69 years      | 1.23 | 1.2  | 1.25 | 0 |
| 37 | Yemen              | Female | 70+ years        | 1.13 | 1.11 | 1.16 | 0 |
| 38 | Yemen              | Female | Age-standardized | 1.25 | 1.22 | 1.28 | 0 |
| 39 | Yemen              | Both   | All Ages         | 2.01 | 1.94 | 2.08 | 0 |
| 40 | Yemen              | Both   | 15-49 years      | 1.38 | 1.27 | 1.49 | 0 |
| 41 | Yemen              | Both   | 50-69 years      | 1.16 | 1.14 | 1.18 | 0 |
| 42 | Yemen              | Both   | 70+ years        | 1.13 | 1.11 | 1.16 | 0 |
| 43 | Russian Federation | Both   | Age-standardized | 0.73 | 0.64 | 0.81 | 0 |
| 44 | Mexico             | Male   | All Ages         | 2.25 | 2.17 | 2.34 | 0 |
| 45 | Mexico             | Male   | 15-49 years      | 1.53 | 1.43 | 1.62 | 0 |
| 46 | Mexico             | Male   | 50-69 years      | 1.05 | 0.97 | 1.13 | 0 |
| 47 | Mexico             | Male   | 70+ years        | 0.76 | 0.7  | 0.83 | 0 |
| 48 | Mexico             | Male   | Age-standardized | 1.1  | 1.03 | 1.18 | 0 |
| 49 | Mexico             | Female | All Ages         | 2.33 | 2.26 | 2.4  | 0 |
| 50 | Mexico             | Female | 15-49 years      | 1.52 | 1.45 | 1.59 | 0 |
| 51 | Mexico             | Female | 50-69 years      | 1.07 | 1.02 | 1.12 | 0 |
| 52 | Mexico             | Female | 70+ years        | 1.03 | 0.95 | 1.1  | 0 |
| 53 | Mexico             | Female | Age-standardized | 1.08 | 1.02 | 1.13 | 0 |
| 54 | Mexico             | Both   | All Ages         | 2.28 | 2.22 | 2.34 | 0 |
| 55 | Mexico             | Both   | 15-49 years      | 1.53 | 1.46 | 1.59 | 0 |
| 56 | Mexico             | Both   | 50-69 years      | 1.04 | 0.99 | 1.1  | 0 |
| 57 | Mexico             | Both   | 70+ years        | 0.86 | 0.8  | 0.92 | 0 |

|    |                     |        |                  |      |      |      |   |
|----|---------------------|--------|------------------|------|------|------|---|
| 1  |                     |        |                  |      |      |      |   |
| 2  | India               | Both   | Age-standardized | 0.72 | 0.71 | 0.74 | 0 |
| 3  | Greece              | Male   | All Ages         | 1.57 | 1.39 | 1.75 | 0 |
| 4  | Greece              | Male   | 15-49 years      | 1.43 | 1.28 | 1.58 | 0 |
| 5  | Greece              | Male   | 50-69 years      | 1    | 0.85 | 1.16 | 0 |
| 6  | Greece              | Male   | 70+ years        | 0.73 | 0.57 | 0.89 | 0 |
| 7  | Greece              | Male   | Age-standardized | 1.04 | 0.89 | 1.19 | 0 |
| 8  | Greece              | Female | All Ages         | 1.92 | 1.73 | 2.11 | 0 |
| 9  | Greece              | Female | 15-49 years      | 1.57 | 1.41 | 1.74 | 0 |
| 10 | Greece              | Female | 50-69 years      | 1.24 | 1.05 | 1.42 | 0 |
| 11 | Greece              | Female | 70+ years        | 1.2  | 1.01 | 1.39 | 0 |
| 12 | Greece              | Female | Age-standardized | 1.24 | 1.07 | 1.41 | 0 |
| 13 | Greece              | Both   | All Ages         | 1.69 | 1.51 | 1.88 | 0 |
| 14 | Greece              | Both   | 15-49 years      | 1.48 | 1.32 | 1.65 | 0 |
| 15 | Greece              | Both   | 50-69 years      | 1.1  | 0.94 | 1.26 | 0 |
| 16 | Greece              | Both   | 70+ years        | 0.96 | 0.78 | 1.14 | 0 |
| 17 | Canada              | Both   | Age-standardized | 0.72 | 0.64 | 0.8  | 0 |
| 18 | Sri Lanka           | Male   | All Ages         | 1.75 | 1.68 | 1.82 | 0 |
| 19 | Sri Lanka           | Male   | 15-49 years      | 1.15 | 1.07 | 1.23 | 0 |
| 20 | Sri Lanka           | Male   | 50-69 years      | 0.92 | 0.85 | 1    | 0 |
| 21 | Sri Lanka           | Male   | 70+ years        | 0.79 | 0.72 | 0.85 | 0 |
| 22 | Sri Lanka           | Male   | Age-standardized | 0.9  | 0.83 | 0.97 | 0 |
| 23 | Sri Lanka           | Female | All Ages         | 1.95 | 1.9  | 2    | 0 |
| 24 | Sri Lanka           | Female | 15-49 years      | 1.11 | 1.07 | 1.14 | 0 |
| 25 | Sri Lanka           | Female | 50-69 years      | 0.93 | 0.89 | 0.96 | 0 |
| 26 | Sri Lanka           | Female | 70+ years        | 0.71 | 0.7  | 0.73 | 0 |
| 27 | Sri Lanka           | Female | Age-standardized | 0.83 | 0.8  | 0.86 | 0 |
| 28 | Sri Lanka           | Both   | All Ages         | 1.82 | 1.77 | 1.88 | 0 |
| 29 | Sri Lanka           | Both   | 15-49 years      | 1.12 | 1.06 | 1.17 | 0 |
| 30 | Sri Lanka           | Both   | 50-69 years      | 0.9  | 0.85 | 0.95 | 0 |
| 31 | Sri Lanka           | Both   | 70+ years        | 0.66 | 0.63 | 0.69 | 0 |
| 32 | Kenya               | Both   | Age-standardized | 0.72 | 0.68 | 0.76 | 0 |
| 33 | Algeria             | Male   | All Ages         | 2.9  | 2.79 | 3    | 0 |
| 34 | Algeria             | Male   | 15-49 years      | 1.9  | 1.75 | 2.06 | 0 |
| 35 | Algeria             | Male   | 50-69 years      | 1.28 | 1.18 | 1.38 | 0 |
| 36 | Algeria             | Male   | 70+ years        | 1.03 | 0.93 | 1.13 | 0 |
| 37 | Algeria             | Male   | Age-standardized | 1.32 | 1.22 | 1.42 | 0 |
| 38 | Algeria             | Female | All Ages         | 2.79 | 2.71 | 2.86 | 0 |
| 39 | Algeria             | Female | 15-49 years      | 1.86 | 1.74 | 1.99 | 0 |
| 40 | Algeria             | Female | 50-69 years      | 1.24 | 1.19 | 1.29 | 0 |
| 41 | Algeria             | Female | 70+ years        | 1.05 | 0.98 | 1.12 | 0 |
| 42 | Algeria             | Female | Age-standardized | 1.27 | 1.21 | 1.32 | 0 |
| 43 | Algeria             | Both   | All Ages         | 2.85 | 2.76 | 2.95 | 0 |
| 44 | Algeria             | Both   | 15-49 years      | 1.88 | 1.74 | 2.02 | 0 |
| 45 | Algeria             | Both   | 50-69 years      | 1.31 | 1.24 | 1.38 | 0 |
| 46 | Algeria             | Both   | 70+ years        | 1.06 | 0.96 | 1.16 | 0 |
| 47 | North Korea         | Both   | Age-standardized | 0.71 | 0.68 | 0.74 | 0 |
| 48 | Trinidad and Tobago | Male   | All Ages         | 2.39 | 2.28 | 2.5  | 0 |
| 49 | Trinidad and Tobago | Male   | 15-49 years      | 1.52 | 1.47 | 1.57 | 0 |
| 50 | Trinidad and Tobago | Male   | 50-69 years      | 1.01 | 0.97 | 1.06 | 0 |
| 51 | Trinidad and Tobago | Male   | 70+ years        | 0.74 | 0.7  | 0.77 | 0 |
| 52 | Trinidad and Tobago | Male   | Age-standardized | 1.1  | 1.05 | 1.15 | 0 |
| 53 | Trinidad and Tobago | Female | All Ages         | 2.56 | 2.46 | 2.67 | 0 |
| 54 | Trinidad and Tobago | Female | 15-49 years      | 1.56 | 1.49 | 1.63 | 0 |
| 55 | Trinidad and Tobago | Female | 50-69 years      | 1.18 | 1.1  | 1.25 | 0 |
| 56 | Trinidad and Tobago | Female | 70+ years        | 1.04 | 0.97 | 1.12 | 0 |
| 57 | Trinidad and Tobago | Female | Age-standardized | 1.2  | 1.13 | 1.28 | 0 |



|    |                     |        |                  |      |      |      |   |
|----|---------------------|--------|------------------|------|------|------|---|
| 1  |                     |        |                  |      |      |      |   |
| 2  | Trinidad and Tobago | Both   | All Ages         | 2.46 | 2.35 | 2.56 | 0 |
| 3  | Trinidad and Tobago | Both   | 15-49 years      | 1.54 | 1.49 | 1.6  | 0 |
| 4  | Trinidad and Tobago | Both   | 50-69 years      | 1.1  | 1.04 | 1.15 | 0 |
| 5  | Trinidad and Tobago | Both   | 70+ years        | 0.85 | 0.81 | 0.89 | 0 |
| 6  | Niger               | Both   | Age-standardized | 0.71 | 0.65 | 0.76 | 0 |
| 7  | Djibouti            | Male   | All Ages         | 2.4  | 2.35 | 2.46 | 0 |
| 8  | Djibouti            | Male   | 15-49 years      | 1.71 | 1.65 | 1.76 | 0 |
| 9  | Djibouti            | Male   | 50-69 years      | 1.28 | 1.23 | 1.34 | 0 |
| 10 | Djibouti            | Male   | 70+ years        | 1.26 | 1.21 | 1.31 | 0 |
| 11 | Djibouti            | Male   | Age-standardized | 1.32 | 1.27 | 1.38 | 0 |
| 12 | Djibouti            | Female | All Ages         | 2.42 | 2.3  | 2.55 | 0 |
| 13 | Djibouti            | Female | 15-49 years      | 1.62 | 1.47 | 1.76 | 0 |
| 14 | Djibouti            | Female | 50-69 years      | 1.13 | 1.03 | 1.22 | 0 |
| 15 | Djibouti            | Female | 70+ years        | 1.27 | 1.18 | 1.35 | 0 |
| 16 | Djibouti            | Female | Age-standardized | 1.19 | 1.1  | 1.28 | 0 |
| 17 | Djibouti            | Both   | All Ages         | 2.4  | 2.33 | 2.47 | 0 |
| 18 | Djibouti            | Both   | 15-49 years      | 1.62 | 1.55 | 1.7  | 0 |
| 19 | Djibouti            | Both   | 50-69 years      | 1.3  | 1.23 | 1.37 | 0 |
| 20 | Djibouti            | Both   | 70+ years        | 1.3  | 1.25 | 1.34 | 0 |
| 21 | Djibouti            | Both   | Age-standardized | 0.71 | 0.63 | 0.8  | 0 |
| 22 | Philippines         | Both   | All Ages         | 1.41 | 1.39 | 1.44 | 0 |
| 23 | Swaziland           | Male   | 15-49 years      | 0.69 | 0.65 | 0.73 | 0 |
| 24 | Swaziland           | Male   | 50-69 years      | 0.47 | 0.46 | 0.49 | 0 |
| 25 | Swaziland           | Male   | 70+ years        | 0.45 | 0.43 | 0.47 | 0 |
| 26 | Swaziland           | Male   | Age-standardized | 0.48 | 0.47 | 0.5  | 0 |
| 27 | Swaziland           | Female | All Ages         | 1.28 | 1.23 | 1.34 | 0 |
| 28 | Swaziland           | Female | 15-49 years      | 0.48 | 0.43 | 0.54 | 0 |
| 29 | Swaziland           | Female | 50-69 years      | 0.39 | 0.34 | 0.43 | 0 |
| 30 | Swaziland           | Female | 70+ years        | 0.49 | 0.45 | 0.54 | 0 |
| 31 | Swaziland           | Female | Age-standardized | 0.4  | 0.35 | 0.45 | 0 |
| 32 | Swaziland           | Both   | All Ages         | 1.38 | 1.35 | 1.42 | 0 |
| 33 | Swaziland           | Both   | 15-49 years      | 0.68 | 0.63 | 0.72 | 0 |
| 34 | Swaziland           | Both   | 50-69 years      | 0.34 | 0.31 | 0.36 | 0 |
| 35 | Swaziland           | Both   | 70+ years        | 0.38 | 0.36 | 0.4  | 0 |
| 36 | Swaziland           | Both   | Age-standardized | 0.7  | 0.65 | 0.74 | 0 |
| 37 | South Africa        | Both   | All Ages         | 2.49 | 2.41 | 2.57 | 0 |
| 38 | Turkmenistan        | Male   | 15-49 years      | 1.65 | 1.57 | 1.73 | 0 |
| 39 | Turkmenistan        | Male   | 50-69 years      | 0.81 | 0.73 | 0.88 | 0 |
| 40 | Turkmenistan        | Male   | 70+ years        | 1.25 | 1.21 | 1.29 | 0 |
| 41 | Turkmenistan        | Male   | Age-standardized | 1.2  | 1.15 | 1.26 | 0 |
| 42 | Turkmenistan        | Female | All Ages         | 2.41 | 2.32 | 2.51 | 0 |
| 43 | Turkmenistan        | Female | 15-49 years      | 1.57 | 1.51 | 1.64 | 0 |
| 44 | Turkmenistan        | Female | 50-69 years      | 0.93 | 0.87 | 0.99 | 0 |
| 45 | Turkmenistan        | Female | 70+ years        | 1.57 | 1.49 | 1.64 | 0 |
| 46 | Turkmenistan        | Female | Age-standardized | 1.31 | 1.23 | 1.4  | 0 |
| 47 | Turkmenistan        | Both   | All Ages         | 2.47 | 2.39 | 2.56 | 0 |
| 48 | Turkmenistan        | Both   | 15-49 years      | 1.66 | 1.59 | 1.74 | 0 |
| 49 | Turkmenistan        | Both   | 50-69 years      | 0.86 | 0.79 | 0.92 | 0 |
| 50 | Turkmenistan        | Both   | 70+ years        | 1.54 | 1.49 | 1.6  | 0 |
| 51 | Tanzania            | Both   | Age-standardized | 0.69 | 0.65 | 0.72 | 0 |
| 52 | Barbados            | Male   | All Ages         | 1.62 | 1.57 | 1.67 | 0 |
| 53 | Barbados            | Male   | 15-49 years      | 1.19 | 1.08 | 1.31 | 0 |
| 54 | Barbados            | Male   | 50-69 years      | 0.78 | 0.75 | 0.81 | 0 |
| 55 | Barbados            | Male   | 70+ years        | 0.63 | 0.59 | 0.66 | 0 |
| 56 | Barbados            | Male   | Age-standardized | 0.86 | 0.81 | 0.91 | 0 |
| 57 | Barbados            | Female | All Ages         | 1.32 | 1.24 | 1.39 | 0 |



|    |            |        |                  |      |      |      |   |
|----|------------|--------|------------------|------|------|------|---|
| 1  |            |        |                  |      |      |      |   |
| 2  | Barbados   | Female | 15-49 years      | 0.93 | 0.78 | 1.08 | 0 |
| 3  | Barbados   | Female | 50-69 years      | 0.54 | 0.48 | 0.61 | 0 |
| 4  | Barbados   | Female | 70+ years        | 0.52 | 0.43 | 0.61 | 0 |
| 5  | Barbados   | Female | Age-standardized | 0.61 | 0.53 | 0.69 | 0 |
| 6  | Barbados   | Both   | All Ages         | 1.49 | 1.43 | 1.55 | 0 |
| 7  | Barbados   | Both   | 15-49 years      | 1.08 | 0.95 | 1.21 | 0 |
| 8  | Barbados   | Both   | 50-69 years      | 0.7  | 0.65 | 0.76 | 0 |
| 9  | Barbados   | Both   | 70+ years        | 0.61 | 0.55 | 0.66 | 0 |
| 10 | Chad       | Both   | Age-standardized | 0.69 | 0.67 | 0.71 | 0 |
| 11 | Senegal    | Male   | All Ages         | 1.03 | 0.91 | 1.14 | 0 |
| 12 | Senegal    | Male   | 15-49 years      | 0.7  | 0.63 | 0.78 | 0 |
| 13 | Senegal    | Male   | 50-69 years      | 0.58 | 0.52 | 0.64 | 0 |
| 14 | Senegal    | Male   | 70+ years        | 0.57 | 0.48 | 0.66 | 0 |
| 15 | Senegal    | Male   | Age-standardized | 0.63 | 0.55 | 0.7  | 0 |
| 16 | Senegal    | Female | All Ages         | 0.88 | 0.75 | 1.01 | 0 |
| 17 | Senegal    | Female | 15-49 years      | 0.42 | 0.31 | 0.53 | 0 |
| 18 | Senegal    | Female | 50-69 years      | 0.24 | 0.14 | 0.35 | 0 |
| 19 | Senegal    | Female | 70+ years        | 0.32 | 0.21 | 0.42 | 0 |
| 20 | Senegal    | Female | Age-standardized | 0.29 | 0.18 | 0.4  | 0 |
| 21 | Senegal    | Both   | All Ages         | 1    | 0.87 | 1.12 | 0 |
| 22 | Senegal    | Both   | 15-49 years      | 0.62 | 0.54 | 0.71 | 0 |
| 23 | Senegal    | Both   | 50-69 years      | 0.42 | 0.35 | 0.49 | 0 |
| 24 | Senegal    | Both   | 70+ years        | 0.4  | 0.3  | 0.49 | 0 |
| 25 | Latvia     | Both   | Age-standardized | 0.68 | 0.59 | 0.78 | 0 |
| 26 | Eritrea    | Male   | All Ages         | 1.17 | 1.08 | 1.25 | 0 |
| 27 | Eritrea    | Male   | 15-49 years      | 0.69 | 0.65 | 0.74 | 0 |
| 28 | Eritrea    | Male   | 50-69 years      | 0.48 | 0.43 | 0.53 | 0 |
| 29 | Eritrea    | Male   | 70+ years        | 0.56 | 0.52 | 0.6  | 0 |
| 30 | Eritrea    | Male   | Age-standardized | 0.54 | 0.49 | 0.58 | 0 |
| 31 | Eritrea    | Female | All Ages         | 0.83 | 0.72 | 0.94 | 0 |
| 32 | Eritrea    | Female | 15-49 years      | 0.38 | 0.34 | 0.42 | 0 |
| 33 | Eritrea    | Female | 50-69 years      | 0.26 | 0.22 | 0.3  | 0 |
| 34 | Eritrea    | Female | 70+ years        | 0.42 | 0.38 | 0.47 | 0 |
| 35 | Eritrea    | Female | Age-standardized | 0.33 | 0.29 | 0.37 | 0 |
| 36 | Eritrea    | Both   | All Ages         | 1.03 | 0.93 | 1.12 | 0 |
| 37 | Eritrea    | Both   | 15-49 years      | 0.59 | 0.55 | 0.63 | 0 |
| 38 | Eritrea    | Both   | 50-69 years      | 0.34 | 0.3  | 0.37 | 0 |
| 39 | Eritrea    | Both   | 70+ years        | 0.4  | 0.36 | 0.43 | 0 |
| 40 | Tajikistan | Both   | Age-standardized | 0.67 | 0.58 | 0.76 | 0 |
| 41 | Singapore  | Male   | All Ages         | 1.77 | 1.72 | 1.81 | 0 |
| 42 | Singapore  | Male   | 15-49 years      | 1.21 | 1.1  | 1.33 | 0 |
| 43 | Singapore  | Male   | 50-69 years      | 0.96 | 0.88 | 1.04 | 0 |
| 44 | Singapore  | Male   | 70+ years        | 0.69 | 0.62 | 0.76 | 0 |
| 45 | Singapore  | Male   | Age-standardized | 0.97 | 0.89 | 1.06 | 0 |
| 46 | Singapore  | Female | All Ages         | 1.92 | 1.85 | 1.99 | 0 |
| 47 | Singapore  | Female | 15-49 years      | 1.29 | 1.13 | 1.46 | 0 |
| 48 | Singapore  | Female | 50-69 years      | 1.25 | 1.14 | 1.35 | 0 |
| 49 | Singapore  | Female | 70+ years        | 1.06 | 0.97 | 1.16 | 0 |
| 50 | Singapore  | Female | Age-standardized | 1.23 | 1.1  | 1.35 | 0 |
| 51 | Singapore  | Both   | All Ages         | 1.73 | 1.67 | 1.79 | 0 |
| 52 | Singapore  | Both   | 15-49 years      | 1.13 | 0.99 | 1.27 | 0 |
| 53 | Singapore  | Both   | 50-69 years      | 1.07 | 0.98 | 1.16 | 0 |
| 54 | Singapore  | Both   | 70+ years        | 0.88 | 0.8  | 0.96 | 0 |
| 55 | Ethiopia   | Both   | Age-standardized | 0.66 | 0.64 | 0.68 | 0 |
| 56 | Uruguay    | Male   | All Ages         | 1.53 | 1.48 | 1.58 | 0 |
| 57 | Uruguay    | Male   | 15-49 years      | 1.33 | 1.3  | 1.36 | 0 |

|    |                       |        |                  |      |      |      |       |
|----|-----------------------|--------|------------------|------|------|------|-------|
| 1  |                       |        |                  |      |      |      |       |
| 2  | Uruguay               | Male   | 50-69 years      | 1.13 | 1.1  | 1.15 | 0     |
| 3  | Uruguay               | Male   | 70+ years        | 0.84 | 0.81 | 0.88 | 0     |
| 4  | Uruguay               | Male   | Age-standardized | 1.18 | 1.14 | 1.21 | 0     |
| 5  | Uruguay               | Female | All Ages         | 1.73 | 1.64 | 1.81 | 0     |
| 6  | Uruguay               | Female | 15-49 years      | 1.39 | 1.33 | 1.46 | 0     |
| 7  | Uruguay               | Female | 50-69 years      | 1.24 | 1.19 | 1.3  | 0     |
| 8  | Uruguay               | Female | 70+ years        | 1.11 | 1.04 | 1.18 | 0     |
| 9  | Uruguay               | Female | Age-standardized | 1.27 | 1.21 | 1.34 | 0     |
| 10 | Uruguay               | Both   | All Ages         | 1.61 | 1.54 | 1.67 | 0     |
| 11 | Uruguay               | Both   | 15-49 years      | 1.35 | 1.31 | 1.39 | 0     |
| 12 | Uruguay               | Both   | 50-69 years      | 1.18 | 1.14 | 1.22 | 0     |
| 13 | Uruguay               | Both   | 70+ years        | 0.98 | 0.93 | 1.03 | 0     |
| 14 | Uruguay               | Both   | Age-standardized | 0.66 | 0.59 | 0.73 | 0     |
| 15 | Serbia                | Both   | All Ages         | 1.36 | 1.2  | 1.52 | 0     |
| 16 | Tajikistan            | Male   | 15-49 years      | 0.82 | 0.7  | 0.94 | 0     |
| 17 | Tajikistan            | Male   | 50-69 years      | 0.14 | 0.03 | 0.24 | 0.013 |
| 18 | Tajikistan            | Male   | 70+ years        | 0.75 | 0.73 | 0.77 | 0     |
| 19 | Tajikistan            | Male   | Age-standardized | 0.56 | 0.48 | 0.65 | 0     |
| 20 | Tajikistan            | Female | All Ages         | 1.3  | 1.1  | 1.49 | 0     |
| 21 | Tajikistan            | Female | 15-49 years      | 0.86 | 0.77 | 0.95 | 0     |
| 22 | Tajikistan            | Female | 50-69 years      | 0.29 | 0.19 | 0.4  | 0     |
| 23 | Tajikistan            | Female | 70+ years        | 1.02 | 0.92 | 1.12 | 0     |
| 24 | Tajikistan            | Female | Age-standardized | 0.75 | 0.66 | 0.84 | 0     |
| 25 | Tajikistan            | Both   | All Ages         | 1.34 | 1.17 | 1.52 | 0     |
| 26 | Tajikistan            | Both   | 15-49 years      | 0.84 | 0.74 | 0.95 | 0     |
| 27 | Tajikistan            | Both   | 50-69 years      | 0.21 | 0.1  | 0.32 | 0.001 |
| 28 | Tajikistan            | Both   | 70+ years        | 1.03 | 0.98 | 1.08 | 0     |
| 29 | Cameroon              | Both   | Age-standardized | 0.66 | 0.63 | 0.68 | 0     |
| 30 | Sao Tome and Principe | Male   | All Ages         | 1.58 | 1.49 | 1.67 | 0     |
| 31 | Sao Tome and Principe | Male   | 15-49 years      | 1.29 | 1.23 | 1.34 | 0     |
| 32 | Sao Tome and Principe | Male   | 50-69 years      | 0.74 | 0.71 | 0.78 | 0     |
| 33 | Sao Tome and Principe | Male   | 70+ years        | 0.82 | 0.78 | 0.87 | 0     |
| 34 | Sao Tome and Principe | Male   | Age-standardized | 0.85 | 0.81 | 0.88 | 0     |
| 35 | Sao Tome and Principe | Female | All Ages         | 1.12 | 1.1  | 1.14 | 0     |
| 36 | Sao Tome and Principe | Female | 15-49 years      | 0.88 | 0.85 | 0.91 | 0     |
| 37 | Sao Tome and Principe | Female | 50-69 years      | 0.48 | 0.42 | 0.53 | 0     |
| 38 | Sao Tome and Principe | Female | 70+ years        | 0.76 | 0.7  | 0.83 | 0     |
| 39 | Sao Tome and Principe | Female | Age-standardized | 0.59 | 0.54 | 0.65 | 0     |
| 40 | Sao Tome and Principe | Both   | All Ages         | 1.41 | 1.35 | 1.48 | 0     |
| 41 | Sao Tome and Principe | Both   | 15-49 years      | 1.17 | 1.13 | 1.21 | 0     |
| 42 | Sao Tome and Principe | Both   | 50-69 years      | 0.63 | 0.61 | 0.66 | 0     |
| 43 | Sao Tome and Principe | Both   | 70+ years        | 0.78 | 0.71 | 0.85 | 0     |
| 44 | The Bahamas           | Both   | Age-standardized | 0.66 | 0.6  | 0.73 | 0     |
| 45 | Norway                | Male   | All Ages         | 1.17 | 1.07 | 1.27 | 0     |
| 46 | Norway                | Male   | 15-49 years      | 1.08 | 0.92 | 1.24 | 0     |
| 47 | Norway                | Male   | 50-69 years      | 0.95 | 0.85 | 1.05 | 0     |
| 48 | Norway                | Male   | 70+ years        | 0.64 | 0.55 | 0.73 | 0     |
| 49 | Norway                | Male   | Age-standardized | 0.97 | 0.86 | 1.09 | 0     |
| 50 | Norway                | Female | All Ages         | 1.32 | 1.19 | 1.44 | 0     |
| 51 | Norway                | Female | 15-49 years      | 1.33 | 1.16 | 1.5  | 0     |
| 52 | Norway                | Female | 50-69 years      | 1.25 | 1.13 | 1.36 | 0     |
| 53 | Norway                | Female | 70+ years        | 1.04 | 0.9  | 1.18 | 0     |
| 54 | Norway                | Female | Age-standardized | 1.26 | 1.12 | 1.39 | 0     |
| 55 | Norway                | Both   | All Ages         | 1.24 | 1.14 | 1.35 | 0     |
| 56 | Norway                | Both   | 15-49 years      | 1.16 | 1    | 1.31 | 0     |
| 57 | Norway                | Both   | 50-69 years      | 1.1  | 0.99 | 1.22 | 0     |

|    |                                  |        |                  |      |      |      |       |
|----|----------------------------------|--------|------------------|------|------|------|-------|
| 1  |                                  |        |                  |      |      |      |       |
| 2  | Norway                           | Both   | 70+ years        | 0.92 | 0.82 | 1.01 | 0     |
| 3  | Zimbabwe                         | Both   | Age-standardized | 0.66 | 0.62 | 0.7  | 0     |
| 4  | Kuwait                           | Male   | All Ages         | 1.67 | 1.64 | 1.7  | 0     |
| 5  | Kuwait                           | Male   | 15-49 years      | 1.27 | 1.25 | 1.3  | 0     |
| 6  | Kuwait                           | Male   | 50-69 years      | 0.85 | 0.84 | 0.86 | 0     |
| 7  | Kuwait                           | Male   | 70+ years        | 0.63 | 0.6  | 0.67 | 0     |
| 8  | Kuwait                           | Male   | Age-standardized | 0.95 | 0.94 | 0.97 | 0     |
| 9  | Kuwait                           | Female | All Ages         | 2.42 | 2.36 | 2.47 | 0     |
| 10 | Kuwait                           | Female | 15-49 years      | 1.69 | 1.64 | 1.73 | 0     |
| 11 | Kuwait                           | Female | 50-69 years      | 1.13 | 1.08 | 1.19 | 0     |
| 12 | Kuwait                           | Female | 70+ years        | 1    | 0.93 | 1.07 | 0     |
| 13 | Kuwait                           | Female | Age-standardized | 1.18 | 1.13 | 1.23 | 0     |
| 14 | Kuwait                           | Both   | All Ages         | 1.86 | 1.81 | 1.9  | 0     |
| 15 | Kuwait                           | Both   | 15-49 years      | 1.32 | 1.29 | 1.36 | 0     |
| 16 | Kuwait                           | Both   | 50-69 years      | 0.86 | 0.84 | 0.88 | 0     |
| 17 | Kuwait                           | Both   | 70+ years        | 0.81 | 0.74 | 0.88 | 0     |
| 18 | Timor-Leste                      | Both   | Age-standardized | 0.65 | 0.62 | 0.68 | 0     |
| 19 | Turkey                           | Male   | All Ages         | 2.17 | 2.09 | 2.24 | 0     |
| 20 | Turkey                           | Male   | 15-49 years      | 1.44 | 1.36 | 1.52 | 0     |
| 21 | Turkey                           | Male   | 50-69 years      | 0.95 | 0.89 | 1.01 | 0     |
| 22 | Turkey                           | Male   | 70+ years        | 0.82 | 0.74 | 0.9  | 0     |
| 23 | Turkey                           | Male   | Age-standardized | 1    | 0.93 | 1.06 | 0     |
| 24 | Turkey                           | Female | All Ages         | 2.24 | 2.15 | 2.33 | 0     |
| 25 | Turkey                           | Female | 15-49 years      | 1.49 | 1.4  | 1.57 | 0     |
| 26 | Turkey                           | Female | 50-69 years      | 1.01 | 0.95 | 1.07 | 0     |
| 27 | Turkey                           | Female | 70+ years        | 0.87 | 0.77 | 0.98 | 0     |
| 28 | Turkey                           | Female | Age-standardized | 1.02 | 0.96 | 1.09 | 0     |
| 29 | Turkey                           | Both   | All Ages         | 2.18 | 2.1  | 2.27 | 0     |
| 30 | Turkey                           | Both   | 15-49 years      | 1.46 | 1.38 | 1.54 | 0     |
| 31 | Turkey                           | Both   | 50-69 years      | 0.98 | 0.93 | 1.04 | 0     |
| 32 | Turkey                           | Both   | 70+ years        | 0.79 | 0.7  | 0.88 | 0     |
| 33 | Japan                            | Both   | Age-standardized | 0.64 | 0.6  | 0.68 | 0     |
| 34 | Russian Federation               | Male   | All Ages         | 1.08 | 1.06 | 1.1  | 0     |
| 35 | Russian Federation               | Male   | 15-49 years      | 0.73 | 0.59 | 0.87 | 0     |
| 36 | Russian Federation               | Male   | 50-69 years      | 0.14 | 0.02 | 0.27 | 0.024 |
| 37 | Russian Federation               | Male   | 70+ years        | 0.26 | 0.23 | 0.29 | 0     |
| 38 | Russian Federation               | Male   | Age-standardized | 0.44 | 0.35 | 0.52 | 0     |
| 39 | Russian Federation               | Female | All Ages         | 1.62 | 1.55 | 1.69 | 0     |
| 40 | Russian Federation               | Female | 15-49 years      | 1.21 | 1.1  | 1.32 | 0     |
| 41 | Russian Federation               | Female | 50-69 years      | 0.73 | 0.61 | 0.85 | 0     |
| 42 | Russian Federation               | Female | 70+ years        | 1.22 | 1.12 | 1.32 | 0     |
| 43 | Russian Federation               | Female | Age-standardized | 1.08 | 0.98 | 1.18 | 0     |
| 44 | Russian Federation               | Both   | All Ages         | 1.28 | 1.24 | 1.32 | 0     |
| 45 | Russian Federation               | Both   | 15-49 years      | 0.85 | 0.72 | 0.99 | 0     |
| 46 | Russian Federation               | Both   | 50-69 years      | 0.42 | 0.3  | 0.53 | 0     |
| 47 | Russian Federation               | Both   | 70+ years        | 1    | 0.94 | 1.06 | 0     |
| 48 | Congo                            | Both   | Age-standardized | 0.64 | 0.61 | 0.67 | 0     |
| 49 | Democratic Republic of the Congo | Male   | All Ages         | 0.44 | 0.35 | 0.54 | 0     |
| 50 | Democratic Republic of the Congo | Male   | 15-49 years      | 0.3  | 0.24 | 0.36 | 0     |
| 51 | Democratic Republic of the Congo | Male   | 50-69 years      | 0.15 | 0.08 | 0.22 | 0     |
| 52 | Democratic Republic of the Congo | Male   | 70+ years        | 0.18 | 0.11 | 0.25 | 0     |
| 53 | Democratic Republic of the Congo | Male   | Age-standardized | 0.21 | 0.14 | 0.27 | 0     |
| 54 | Democratic Republic of the Congo | Female | All Ages         | 0.45 | 0.33 | 0.56 | 0     |
| 55 | Democratic Republic of the Congo | Female | 15-49 years      | 0.34 | 0.24 | 0.44 | 0     |
| 56 | Democratic Republic of the Congo | Female | 50-69 years      | 0.29 | 0.18 | 0.4  | 0     |
| 57 | Democratic Republic of the Congo | Female | 70+ years        | 0.44 | 0.34 | 0.55 | 0     |

|    |                                    |                  |                  |      |      |       |   |
|----|------------------------------------|------------------|------------------|------|------|-------|---|
| 1  |                                    |                  |                  |      |      |       |   |
| 2  | Democratic Republic of the (Female | Age-standardized | 0.36             | 0.25 | 0.46 | 0     |   |
| 3  | Democratic Republic of the (Both   | All Ages         | 0.46             | 0.35 | 0.56 | 0     |   |
| 4  | Democratic Republic of the (Both   | 15-49 years      | 0.34             | 0.26 | 0.41 | 0     |   |
| 5  | Democratic Republic of the (Both   | 50-69 years      | 0.26             | 0.16 | 0.35 | 0     |   |
| 6  | Democratic Republic of the (Both   | 70+ years        | 0.15             | 0.04 | 0.26 | 0.008 |   |
| 7  | Belarus                            | Both             | Age-standardized | 0.61 | 0.51 | 0.72  | 0 |
| 8  | Croatia                            | Male             | All Ages         | 1.28 | 1.17 | 1.38  | 0 |
| 9  | Croatia                            | Male             | 15-49 years      | 0.84 | 0.77 | 0.9   | 0 |
| 10 | Croatia                            | Male             | 50-69 years      | 0.31 | 0.2  | 0.43  | 0 |
| 11 | Croatia                            | Male             | 70+ years        | 0.54 | 0.38 | 0.69  | 0 |
| 12 | Croatia                            | Male             | Age-standardized | 0.57 | 0.5  | 0.64  | 0 |
| 13 | Croatia                            | Female           | All Ages         | 1.79 | 1.66 | 1.91  | 0 |
| 14 | Croatia                            | Female           | 15-49 years      | 1.09 | 1    | 1.19  | 0 |
| 15 | Croatia                            | Female           | 50-69 years      | 0.97 | 0.86 | 1.08  | 0 |
| 16 | Croatia                            | Female           | 70+ years        | 1.21 | 1.07 | 1.35  | 0 |
| 17 | Croatia                            | Female           | Age-standardized | 1.04 | 0.96 | 1.13  | 0 |
| 18 | Croatia                            | Both             | All Ages         | 1.5  | 1.39 | 1.61  | 0 |
| 19 | Croatia                            | Both             | 15-49 years      | 0.93 | 0.86 | 1     | 0 |
| 20 | Croatia                            | Both             | 50-69 years      | 0.63 | 0.52 | 0.75  | 0 |
| 21 | Croatia                            | Both             | 70+ years        | 0.98 | 0.83 | 1.13  | 0 |
| 22 | Croatia                            | Both             | Age-standardized | 0.59 | 0.46 | 0.73  | 0 |
| 23 | Rwanda                             | Both             | All Ages         | 1.17 | 1.08 | 1.26  | 0 |
| 24 | Angola                             | Male             | 15-49 years      | 1.44 | 1.36 | 1.51  | 0 |
| 25 | Angola                             | Male             | 50-69 years      | 1.32 | 1.25 | 1.4   | 0 |
| 26 | Angola                             | Male             | 70+ years        | 1.3  | 1.24 | 1.37  | 0 |
| 27 | Angola                             | Male             | Age-standardized | 1.38 | 1.3  | 1.46  | 0 |
| 28 | Angola                             | Female           | All Ages         | 1.18 | 1.05 | 1.31  | 0 |
| 29 | Angola                             | Female           | 15-49 years      | 1.17 | 1.06 | 1.28  | 0 |
| 30 | Angola                             | Female           | 50-69 years      | 1.04 | 0.93 | 1.15  | 0 |
| 31 | Angola                             | Female           | 70+ years        | 1.22 | 1.11 | 1.33  | 0 |
| 32 | Angola                             | Female           | Age-standardized | 1.12 | 1.01 | 1.23  | 0 |
| 33 | Angola                             | Both             | All Ages         | 1.14 | 1.03 | 1.25  | 0 |
| 34 | Angola                             | Both             | 15-49 years      | 1.28 | 1.18 | 1.37  | 0 |
| 35 | Angola                             | Both             | 50-69 years      | 1.14 | 1.05 | 1.23  | 0 |
| 36 | Angola                             | Both             | 70+ years        | 1.15 | 1.08 | 1.23  | 0 |
| 37 | Angola                             | Both             | Age-standardized | 0.59 | 0.54 | 0.64  | 0 |
| 38 | Iraq                               | Both             | All Ages         | 0.8  | 0.73 | 0.87  | 0 |
| 39 | Malawi                             | Male             | 15-49 years      | 0.84 | 0.79 | 0.89  | 0 |
| 40 | Malawi                             | Male             | 50-69 years      | 0.75 | 0.7  | 0.79  | 0 |
| 41 | Malawi                             | Male             | 70+ years        | 0.77 | 0.73 | 0.82  | 0 |
| 42 | Malawi                             | Male             | Age-standardized | 0.79 | 0.75 | 0.84  | 0 |
| 43 | Malawi                             | Female           | All Ages         | 0.5  | 0.41 | 0.58  | 0 |
| 44 | Malawi                             | Female           | 15-49 years      | 0.41 | 0.37 | 0.45  | 0 |
| 45 | Malawi                             | Female           | 50-69 years      | 0.31 | 0.29 | 0.34  | 0 |
| 46 | Malawi                             | Female           | 70+ years        | 0.43 | 0.4  | 0.46  | 0 |
| 47 | Malawi                             | Female           | Age-standardized | 0.39 | 0.36 | 0.41  | 0 |
| 48 | Malawi                             | Both             | All Ages         | 0.66 | 0.59 | 0.74  | 0 |
| 49 | Malawi                             | Both             | 15-49 years      | 0.66 | 0.62 | 0.7   | 0 |
| 50 | Malawi                             | Both             | 50-69 years      | 0.51 | 0.48 | 0.54  | 0 |
| 51 | Malawi                             | Both             | 70+ years        | 0.46 | 0.42 | 0.49  | 0 |
| 52 | Malawi                             | Both             | Age-standardized | 0.58 | 0.52 | 0.63  | 0 |
| 53 | Guinea                             | Both             | All Ages         | 1.87 | 1.71 | 2.02  | 0 |
| 54 | Germany                            | Male             | 15-49 years      | 1.53 | 1.36 | 1.7   | 0 |
| 55 | Germany                            | Male             | 50-69 years      | 1.39 | 1.25 | 1.53  | 0 |
| 56 | Germany                            | Male             | 70+ years        | 1.14 | 1.02 | 1.25  | 0 |
| 57 | Germany                            | Male             | Age-standardized | 1.39 | 1.27 | 1.51  | 0 |

|    |                              |        |                  |      |      |      |   |
|----|------------------------------|--------|------------------|------|------|------|---|
| 1  |                              |        |                  |      |      |      |   |
| 2  | Germany                      | Female | All Ages         | 1.81 | 1.7  | 1.91 | 0 |
| 3  | Germany                      | Female | 15-49 years      | 1.52 | 1.4  | 1.64 | 0 |
| 4  | Germany                      | Female | 50-69 years      | 1.4  | 1.28 | 1.52 | 0 |
| 5  | Germany                      | Female | 70+ years        | 1.31 | 1.2  | 1.41 | 0 |
| 6  | Germany                      | Female | Age-standardized | 1.41 | 1.31 | 1.5  | 0 |
| 7  | Germany                      | Both   | All Ages         | 1.87 | 1.73 | 2.01 | 0 |
| 8  | Germany                      | Both   | 15-49 years      | 1.5  | 1.35 | 1.66 | 0 |
| 9  | Germany                      | Both   | 50-69 years      | 1.44 | 1.29 | 1.58 | 0 |
| 10 | Germany                      | Both   | 70+ years        | 1.6  | 1.48 | 1.72 | 0 |
| 11 | Malawi                       | Both   | Age-standardized | 0.58 | 0.55 | 0.62 | 0 |
| 12 | Federated States of Microne: | Male   | All Ages         | 2.16 | 2.07 | 2.25 | 0 |
| 13 | Federated States of Microne: | Male   | 15-49 years      | 1.29 | 1.15 | 1.43 | 0 |
| 14 | Federated States of Microne: | Male   | 50-69 years      | 0.96 | 0.83 | 1.09 | 0 |
| 15 | Federated States of Microne: | Male   | 70+ years        | 0.83 | 0.7  | 0.95 | 0 |
| 16 | Federated States of Microne: | Male   | Age-standardized | 1.06 | 0.92 | 1.2  | 0 |
| 17 | Federated States of Microne: | Female | All Ages         | 2.4  | 2.27 | 2.53 | 0 |
| 18 | Federated States of Microne: | Female | 15-49 years      | 1.54 | 1.37 | 1.72 | 0 |
| 19 | Federated States of Microne: | Female | 50-69 years      | 1.26 | 1.14 | 1.38 | 0 |
| 20 | Federated States of Microne: | Female | 70+ years        | 1.07 | 0.92 | 1.23 | 0 |
| 21 | Federated States of Microne: | Female | Age-standardized | 1.28 | 1.13 | 1.43 | 0 |
| 22 | Federated States of Microne: | Both   | All Ages         | 2.26 | 2.16 | 2.37 | 0 |
| 23 | Federated States of Microne: | Both   | 15-49 years      | 1.4  | 1.25 | 1.55 | 0 |
| 24 | Federated States of Microne: | Both   | 50-69 years      | 1.1  | 0.98 | 1.22 | 0 |
| 25 | Federated States of Microne: | Both   | 70+ years        | 0.9  | 0.76 | 1.03 | 0 |
| 26 | Kyrgyzstan                   | Both   | Age-standardized | 0.57 | 0.48 | 0.66 | 0 |
| 27 | Guam                         | Male   | All Ages         | 1.64 | 1.55 | 1.74 | 0 |
| 28 | Guam                         | Male   | 15-49 years      | 1.15 | 1.13 | 1.17 | 0 |
| 29 | Guam                         | Male   | 50-69 years      | 0.88 | 0.8  | 0.96 | 0 |
| 30 | Guam                         | Male   | 70+ years        | 0.72 | 0.67 | 0.78 | 0 |
| 31 | Guam                         | Male   | Age-standardized | 0.98 | 0.91 | 1.05 | 0 |
| 32 | Guam                         | Female | All Ages         | 2.22 | 2.13 | 2.32 | 0 |
| 33 | Guam                         | Female | 15-49 years      | 1.43 | 1.38 | 1.49 | 0 |
| 34 | Guam                         | Female | 50-69 years      | 1.42 | 1.32 | 1.51 | 0 |
| 35 | Guam                         | Female | 70+ years        | 1.08 | 1    | 1.16 | 0 |
| 36 | Guam                         | Female | Age-standardized | 1.33 | 1.22 | 1.43 | 0 |
| 37 | Guam                         | Both   | All Ages         | 1.87 | 1.77 | 1.97 | 0 |
| 38 | Guam                         | Both   | 15-49 years      | 1.24 | 1.2  | 1.28 | 0 |
| 39 | Guam                         | Both   | 50-69 years      | 1.11 | 1.01 | 1.2  | 0 |
| 40 | Guam                         | Both   | 70+ years        | 0.89 | 0.84 | 0.95 | 0 |
| 41 | The Gambia                   | Both   | Age-standardized | 0.55 | 0.53 | 0.58 | 0 |
| 42 | Jordan                       | Male   | All Ages         | 2.13 | 2.08 | 2.18 | 0 |
| 43 | Jordan                       | Male   | 15-49 years      | 1.67 | 1.64 | 1.71 | 0 |
| 44 | Jordan                       | Male   | 50-69 years      | 1.01 | 0.99 | 1.03 | 0 |
| 45 | Jordan                       | Male   | 70+ years        | 0.92 | 0.88 | 0.96 | 0 |
| 46 | Jordan                       | Male   | Age-standardized | 1.09 | 1.07 | 1.11 | 0 |
| 47 | Jordan                       | Female | All Ages         | 2.3  | 2.25 | 2.35 | 0 |
| 48 | Jordan                       | Female | 15-49 years      | 1.8  | 1.75 | 1.85 | 0 |
| 49 | Jordan                       | Female | 50-69 years      | 1.27 | 1.23 | 1.31 | 0 |
| 50 | Jordan                       | Female | 70+ years        | 1.19 | 1.14 | 1.23 | 0 |
| 51 | Jordan                       | Female | Age-standardized | 1.28 | 1.24 | 1.32 | 0 |
| 52 | Jordan                       | Both   | All Ages         | 2.21 | 2.17 | 2.25 | 0 |
| 53 | Jordan                       | Both   | 15-49 years      | 1.74 | 1.72 | 1.76 | 0 |
| 54 | Jordan                       | Both   | 50-69 years      | 1.09 | 1.08 | 1.1  | 0 |
| 55 | Jordan                       | Both   | 70+ years        | 1.1  | 1.04 | 1.17 | 0 |
| 56 | Northern Mariana Islands     | Both   | Age-standardized | 0.54 | 0.49 | 0.59 | 0 |
| 57 | High SDI                     | Male   | All Ages         | 1.61 | 1.51 | 1.7  | 0 |



|    |                          |        |                  |      |      |      |   |
|----|--------------------------|--------|------------------|------|------|------|---|
| 1  |                          |        |                  |      |      |      |   |
| 2  | High SDI                 | Male   | 15-49 years      | 1.29 | 1.19 | 1.39 | 0 |
| 3  | High SDI                 | Male   | 50-69 years      | 1.06 | 1    | 1.12 | 0 |
| 4  | High SDI                 | Male   | 70+ years        | 0.71 | 0.63 | 0.79 | 0 |
| 5  | High SDI                 | Male   | Age-standardized | 1.1  | 1.02 | 1.18 | 0 |
| 6  | High SDI                 | Female | All Ages         | 1.62 | 1.54 | 1.71 | 0 |
| 7  | High SDI                 | Female | 15-49 years      | 1.33 | 1.23 | 1.42 | 0 |
| 8  | High SDI                 | Female | 50-69 years      | 1.13 | 1.1  | 1.16 | 0 |
| 9  | High SDI                 | Female | 70+ years        | 0.8  | 0.7  | 0.9  | 0 |
| 10 | High SDI                 | Female | Age-standardized | 1.15 | 1.08 | 1.22 | 0 |
| 11 | High SDI                 | Both   | All Ages         | 1.62 | 1.53 | 1.71 | 0 |
| 12 | High SDI                 | Both   | 15-49 years      | 1.3  | 1.2  | 1.4  | 0 |
| 13 | High SDI                 | Both   | 50-69 years      | 1.11 | 1.06 | 1.16 | 0 |
| 14 | High SDI                 | Both   | 70+ years        | 0.83 | 0.74 | 0.92 | 0 |
| 15 | High SDI                 | Both   | Age-standardized | 1.14 | 1.06 | 1.21 | 0 |
| 16 | Zimbabwe                 | Male   | All Ages         | 0.7  | 0.62 | 0.79 | 0 |
| 17 | Zimbabwe                 | Male   | 15-49 years      | 0.63 | 0.56 | 0.69 | 0 |
| 18 | Zimbabwe                 | Male   | 50-69 years      | 0.3  | 0.25 | 0.35 | 0 |
| 19 | Zimbabwe                 | Male   | 70+ years        | 0.26 | 0.21 | 0.31 | 0 |
| 20 | Zimbabwe                 | Male   | Age-standardized | 0.36 | 0.3  | 0.41 | 0 |
| 21 | Zimbabwe                 | Female | All Ages         | 1.65 | 1.6  | 1.69 | 0 |
| 22 | Zimbabwe                 | Female | 15-49 years      | 1.3  | 1.21 | 1.39 | 0 |
| 23 | Zimbabwe                 | Female | 50-69 years      | 1.04 | 0.97 | 1.11 | 0 |
| 24 | Zimbabwe                 | Female | 70+ years        | 1.19 | 1.13 | 1.26 | 0 |
| 25 | Zimbabwe                 | Female | Age-standardized | 1.09 | 1.04 | 1.15 | 0 |
| 26 | Zimbabwe                 | Both   | All Ages         | 1.12 | 1.06 | 1.18 | 0 |
| 27 | Zimbabwe                 | Both   | 15-49 years      | 0.92 | 0.85 | 0.99 | 0 |
| 28 | Zimbabwe                 | Both   | 50-69 years      | 0.55 | 0.49 | 0.6  | 0 |
| 29 | Zimbabwe                 | Both   | 70+ years        | 0.67 | 0.63 | 0.71 | 0 |
| 30 | Zimbabwe                 | Both   | Age-standardized | 0.52 | 0.49 | 0.55 | 0 |
| 31 | Sierra Leone             | Both   | All Ages         | 2.15 | 2.02 | 2.29 | 0 |
| 32 | Uzbekistan               | Male   | 15-49 years      | 1.44 | 1.3  | 1.57 | 0 |
| 33 | Uzbekistan               | Male   | 50-69 years      | 0.69 | 0.62 | 0.77 | 0 |
| 34 | Uzbekistan               | Male   | 70+ years        | 1.41 | 1.36 | 1.45 | 0 |
| 35 | Uzbekistan               | Male   | Age-standardized | 1.1  | 0.98 | 1.22 | 0 |
| 36 | Uzbekistan               | Female | All Ages         | 2.21 | 2.02 | 2.4  | 0 |
| 37 | Uzbekistan               | Female | 15-49 years      | 1.54 | 1.4  | 1.67 | 0 |
| 38 | Uzbekistan               | Female | 50-69 years      | 0.92 | 0.83 | 1.01 | 0 |
| 39 | Uzbekistan               | Female | 70+ years        | 1.62 | 1.48 | 1.75 | 0 |
| 40 | Uzbekistan               | Female | Age-standardized | 1.31 | 1.17 | 1.46 | 0 |
| 41 | Uzbekistan               | Both   | All Ages         | 2.18 | 2.02 | 2.34 | 0 |
| 42 | Uzbekistan               | Both   | 15-49 years      | 1.48 | 1.35 | 1.62 | 0 |
| 43 | Uzbekistan               | Both   | 50-69 years      | 0.8  | 0.72 | 0.87 | 0 |
| 44 | Uzbekistan               | Both   | 70+ years        | 1.62 | 1.54 | 1.7  | 0 |
| 45 | Uzbekistan               | Both   | Age-standardized | 0.49 | 0.45 | 0.53 | 0 |
| 46 | Central African Republic | Both   | All Ages         | 2.11 | 2.03 | 2.19 | 0 |
| 47 | Suriname                 | Male   | 15-49 years      | 1.78 | 1.72 | 1.83 | 0 |
| 48 | Suriname                 | Male   | 50-69 years      | 1.2  | 1.14 | 1.27 | 0 |
| 49 | Suriname                 | Male   | 70+ years        | 1.06 | 1    | 1.13 | 0 |
| 50 | Suriname                 | Male   | Age-standardized | 1.29 | 1.21 | 1.36 | 0 |
| 51 | Suriname                 | Female | All Ages         | 2.2  | 2.15 | 2.25 | 0 |
| 52 | Suriname                 | Female | 15-49 years      | 1.62 | 1.57 | 1.66 | 0 |
| 53 | Suriname                 | Female | 50-69 years      | 1.17 | 1.14 | 1.2  | 0 |
| 54 | Suriname                 | Female | 70+ years        | 1.16 | 1.13 | 1.2  | 0 |
| 55 | Suriname                 | Female | Age-standardized | 1.2  | 1.17 | 1.24 | 0 |
| 56 | Suriname                 | Both   | All Ages         | 2.13 | 2.07 | 2.2  | 0 |
| 57 | Suriname                 | Both   | 15-49 years      | 1.69 | 1.64 | 1.74 | 0 |
| 58 | Suriname                 | Both   | 50-69 years      |      |      |      |   |
| 59 | Suriname                 | Both   | 70+ years        |      |      |      |   |
| 60 | Suriname                 | Both   | Age-standardized |      |      |      |   |



|    |                   |        |                  |      |       |      |       |
|----|-------------------|--------|------------------|------|-------|------|-------|
| 1  |                   |        |                  |      |       |      |       |
| 2  | Suriname          | Both   | 50-69 years      | 1.18 | 1.13  | 1.23 | 0     |
| 3  | Suriname          | Both   | 70+ years        | 1.06 | 1.02  | 1.09 | 0     |
| 4  | Uganda            | Both   | Age-standardized | 0.49 | 0.45  | 0.53 | 0     |
| 5  | Afghanistan       | Male   | All Ages         | 0.08 | -0.26 | 0.42 | 0.636 |
| 6  | Afghanistan       | Male   | 15-49 years      | 1.22 | 1.08  | 1.36 | 0     |
| 7  | Afghanistan       | Male   | 50-69 years      | 0.85 | 0.75  | 0.96 | 0     |
| 8  | Afghanistan       | Male   | 70+ years        | 0.68 | 0.6   | 0.77 | 0     |
| 9  | Afghanistan       | Male   | Age-standardized | 0.82 | 0.71  | 0.92 | 0     |
| 10 | Afghanistan       | Female | All Ages         | 0.47 | 0.22  | 0.72 | 0.001 |
| 11 | Afghanistan       | Female | 15-49 years      | 1.4  | 1.27  | 1.54 | 0     |
| 12 | Afghanistan       | Female | 50-69 years      | 1.09 | 1.03  | 1.14 | 0     |
| 13 | Afghanistan       | Female | 70+ years        | 1    | 0.94  | 1.06 | 0     |
| 14 | Afghanistan       | Female | Age-standardized | 1.07 | 1     | 1.14 | 0     |
| 15 | Afghanistan       | Both   | All Ages         | 0.23 | -0.07 | 0.54 | 0.126 |
| 16 | Afghanistan       | Both   | 15-49 years      | 1.32 | 1.19  | 1.45 | 0     |
| 17 | Afghanistan       | Both   | 50-69 years      | 0.83 | 0.73  | 0.93 | 0     |
| 18 | Afghanistan       | Both   | 70+ years        | 0.7  | 0.63  | 0.77 | 0     |
| 19 | Afghanistan       | Both   | Age-standardized | 0.49 | 0.4   | 0.57 | 0     |
| 20 | Senegal           | Both   | Age-standardized | 0.49 | 0.4   | 0.57 | 0     |
| 21 | Brazil            | Male   | All Ages         | 2.32 | 2.3   | 2.34 | 0     |
| 22 | Brazil            | Male   | 15-49 years      | 1.52 | 1.5   | 1.54 | 0     |
| 23 | Brazil            | Male   | 50-69 years      | 1.12 | 1.09  | 1.14 | 0     |
| 24 | Brazil            | Male   | 70+ years        | 0.87 | 0.84  | 0.9  | 0     |
| 25 | Brazil            | Male   | Age-standardized | 1.14 | 1.12  | 1.17 | 0     |
| 26 | Brazil            | Female | All Ages         | 2.54 | 2.51  | 2.56 | 0     |
| 27 | Brazil            | Female | 15-49 years      | 1.63 | 1.61  | 1.65 | 0     |
| 28 | Brazil            | Female | 50-69 years      | 1.22 | 1.17  | 1.27 | 0     |
| 29 | Brazil            | Female | 70+ years        | 1.06 | 1.03  | 1.1  | 0     |
| 30 | Brazil            | Female | Age-standardized | 1.23 | 1.19  | 1.26 | 0     |
| 31 | Brazil            | Both   | All Ages         | 2.41 | 2.39  | 2.43 | 0     |
| 32 | Brazil            | Both   | 15-49 years      | 1.57 | 1.56  | 1.59 | 0     |
| 33 | Brazil            | Both   | 50-69 years      | 1.15 | 1.12  | 1.19 | 0     |
| 34 | Brazil            | Both   | 70+ years        | 0.94 | 0.91  | 0.96 | 0     |
| 35 | Brazil            | Both   | Age-standardized | 0.49 | 0.42  | 0.55 | 0     |
| 36 | Czech Republic    | Both   | Age-standardized | 0.49 | 0.42  | 0.55 | 0     |
| 37 | Thailand          | Male   | All Ages         | 2.85 | 2.81  | 2.9  | 0     |
| 38 | Thailand          | Male   | 15-49 years      | 1.96 | 1.88  | 2.04 | 0     |
| 39 | Thailand          | Male   | 50-69 years      | 1.38 | 1.34  | 1.42 | 0     |
| 40 | Thailand          | Male   | 70+ years        | 1.16 | 1.11  | 1.2  | 0     |
| 41 | Thailand          | Male   | Age-standardized | 1.4  | 1.37  | 1.43 | 0     |
| 42 | Thailand          | Female | All Ages         | 2.87 | 2.79  | 2.95 | 0     |
| 43 | Thailand          | Female | 15-49 years      | 1.93 | 1.82  | 2.04 | 0     |
| 44 | Thailand          | Female | 50-69 years      | 1.4  | 1.32  | 1.48 | 0     |
| 45 | Thailand          | Female | 70+ years        | 1.26 | 1.19  | 1.33 | 0     |
| 46 | Thailand          | Female | Age-standardized | 1.36 | 1.29  | 1.44 | 0     |
| 47 | Thailand          | Both   | All Ages         | 2.85 | 2.81  | 2.9  | 0     |
| 48 | Thailand          | Both   | 15-49 years      | 1.95 | 1.86  | 2.03 | 0     |
| 49 | Thailand          | Both   | 50-69 years      | 1.38 | 1.34  | 1.43 | 0     |
| 50 | Thailand          | Both   | 70+ years        | 1.21 | 1.15  | 1.26 | 0     |
| 51 | Hungary           | Both   | Age-standardized | 0.48 | 0.45  | 0.52 | 0     |
| 52 | Equatorial Guinea | Male   | All Ages         | 1.52 | 1.38  | 1.67 | 0     |
| 53 | Equatorial Guinea | Male   | 15-49 years      | 1.4  | 1.3   | 1.5  | 0     |
| 54 | Equatorial Guinea | Male   | 50-69 years      | 1.31 | 1.19  | 1.44 | 0     |
| 55 | Equatorial Guinea | Male   | 70+ years        | 1.18 | 1.06  | 1.3  | 0     |
| 56 | Equatorial Guinea | Male   | Age-standardized | 1.43 | 1.3   | 1.56 | 0     |
| 57 | Equatorial Guinea | Female | All Ages         | 1.99 | 1.87  | 2.11 | 0     |
| 58 | Equatorial Guinea | Female | 15-49 years      | 1.93 | 1.79  | 2.07 | 0     |
| 59 | Equatorial Guinea | Female | 50-69 years      | 1.73 | 1.6   | 1.86 | 0     |
| 60 | Equatorial Guinea | Female | 50-69 years      | 1.73 | 1.6   | 1.86 | 0     |

|    |                   |        |                  |      |       |      |       |
|----|-------------------|--------|------------------|------|-------|------|-------|
| 1  |                   |        |                  |      |       |      |       |
| 2  | Equatorial Guinea | Female | 70+ years        | 1.84 | 1.7   | 1.98 | 0     |
| 3  | Equatorial Guinea | Female | Age-standardized | 1.86 | 1.71  | 2    | 0     |
| 4  | Equatorial Guinea | Both   | All Ages         | 1.78 | 1.66  | 1.91 | 0     |
| 5  | Equatorial Guinea | Both   | 15-49 years      | 1.76 | 1.64  | 1.87 | 0     |
| 6  | Equatorial Guinea | Both   | 50-69 years      | 1.45 | 1.34  | 1.57 | 0     |
| 7  | Equatorial Guinea | Both   | 70+ years        | 1.5  | 1.37  | 1.63 | 0     |
| 8  | Kazakhstan        | Both   | Age-standardized | 0.45 | 0.34  | 0.56 | 0     |
| 9  | Lebanon           | Male   | All Ages         | 2.03 | 1.98  | 2.07 | 0     |
| 10 | Lebanon           | Male   | 15-49 years      | 1.57 | 1.52  | 1.62 | 0     |
| 11 | Lebanon           | Male   | 50-69 years      | 1.06 | 1.04  | 1.09 | 0     |
| 12 | Lebanon           | Male   | 70+ years        | 0.92 | 0.86  | 0.98 | 0     |
| 13 | Lebanon           | Male   | Age-standardized | 1.12 | 1.09  | 1.15 | 0     |
| 14 | Lebanon           | Female | All Ages         | 2.02 | 1.96  | 2.08 | 0     |
| 15 | Lebanon           | Female | 15-49 years      | 1.54 | 1.49  | 1.59 | 0     |
| 16 | Lebanon           | Female | 50-69 years      | 1.18 | 1.13  | 1.22 | 0     |
| 17 | Lebanon           | Female | 70+ years        | 1.04 | 0.98  | 1.1  | 0     |
| 18 | Lebanon           | Female | Age-standardized | 1.18 | 1.14  | 1.22 | 0     |
| 19 | Lebanon           | Both   | All Ages         | 2.03 | 1.98  | 2.08 | 0     |
| 20 | Lebanon           | Both   | 15-49 years      | 1.59 | 1.54  | 1.64 | 0     |
| 21 | Lebanon           | Both   | 50-69 years      | 1.09 | 1.06  | 1.11 | 0     |
| 22 | Lebanon           | Both   | 70+ years        | 0.97 | 0.9   | 1.03 | 0     |
| 23 | Swaziland         | Both   | Age-standardized | 0.45 | 0.43  | 0.48 | 0     |
| 24 | Nicaragua         | Male   | All Ages         | 3.02 | 2.93  | 3.11 | 0     |
| 25 | Nicaragua         | Male   | 15-49 years      | 1.98 | 1.89  | 2.07 | 0     |
| 26 | Nicaragua         | Male   | 50-69 years      | 1.49 | 1.43  | 1.55 | 0     |
| 27 | Nicaragua         | Male   | 70+ years        | 1.26 | 1.2   | 1.32 | 0     |
| 28 | Nicaragua         | Male   | Age-standardized | 1.59 | 1.52  | 1.66 | 0     |
| 29 | Nicaragua         | Female | All Ages         | 3.12 | 2.99  | 3.25 | 0     |
| 30 | Nicaragua         | Female | 15-49 years      | 2.04 | 1.92  | 2.16 | 0     |
| 31 | Nicaragua         | Female | 50-69 years      | 1.59 | 1.49  | 1.69 | 0     |
| 32 | Nicaragua         | Female | 70+ years        | 1.47 | 1.38  | 1.56 | 0     |
| 33 | Nicaragua         | Female | Age-standardized | 1.64 | 1.53  | 1.74 | 0     |
| 34 | Nicaragua         | Both   | All Ages         | 3.07 | 2.96  | 3.17 | 0     |
| 35 | Nicaragua         | Both   | 15-49 years      | 2.02 | 1.91  | 2.12 | 0     |
| 36 | Nicaragua         | Both   | 50-69 years      | 1.52 | 1.45  | 1.6  | 0     |
| 37 | Nicaragua         | Both   | 70+ years        | 1.35 | 1.28  | 1.42 | 0     |
| 38 | Mozambique        | Both   | Age-standardized | 0.45 | 0.4   | 0.49 | 0     |
| 39 | Czech Republic    | Male   | All Ages         | 1.07 | 1.04  | 1.1  | 0     |
| 40 | Czech Republic    | Male   | 15-49 years      | 0.74 | 0.63  | 0.85 | 0     |
| 41 | Czech Republic    | Male   | 50-69 years      | 0.1  | -0.03 | 0.22 | 0.127 |
| 42 | Czech Republic    | Male   | 70+ years        | 0.14 | 0.12  | 0.17 | 0     |
| 43 | Czech Republic    | Male   | Age-standardized | 0.29 | 0.24  | 0.34 | 0     |
| 44 | Czech Republic    | Female | All Ages         | 1.39 | 1.32  | 1.47 | 0     |
| 45 | Czech Republic    | Female | 15-49 years      | 0.87 | 0.76  | 0.98 | 0     |
| 46 | Czech Republic    | Female | 50-69 years      | 0.69 | 0.48  | 0.91 | 0     |
| 47 | Czech Republic    | Female | 70+ years        | 0.64 | 0.56  | 0.72 | 0     |
| 48 | Czech Republic    | Female | Age-standardized | 0.66 | 0.58  | 0.73 | 0     |
| 49 | Czech Republic    | Both   | All Ages         | 1.21 | 1.16  | 1.25 | 0     |
| 50 | Czech Republic    | Both   | 15-49 years      | 0.81 | 0.7   | 0.92 | 0     |
| 51 | Czech Republic    | Both   | 50-69 years      | 0.39 | 0.23  | 0.54 | 0     |
| 52 | Czech Republic    | Both   | 70+ years        | 0.49 | 0.44  | 0.53 | 0     |
| 53 | Eritrea           | Both   | Age-standardized | 0.44 | 0.41  | 0.47 | 0     |
| 54 | Belize            | Male   | All Ages         | 1.97 | 1.91  | 2.04 | 0     |
| 55 | Belize            | Male   | 15-49 years      | 1.32 | 1.21  | 1.43 | 0     |
| 56 | Belize            | Male   | 50-69 years      | 0.85 | 0.79  | 0.91 | 0     |
| 57 | Belize            | Male   | 70+ years        | 0.67 | 0.6   | 0.74 | 0     |

|    |                      |        |                  |      |      |      |   |
|----|----------------------|--------|------------------|------|------|------|---|
| 1  |                      |        |                  |      |      |      |   |
| 2  | Belize               | Male   | Age-standardized | 0.97 | 0.9  | 1.04 | 0 |
| 3  | Belize               | Female | All Ages         | 2.12 | 1.99 | 2.25 | 0 |
| 4  | Belize               | Female | 15-49 years      | 1.44 | 1.27 | 1.61 | 0 |
| 5  | Belize               | Female | 50-69 years      | 1    | 0.86 | 1.14 | 0 |
| 6  | Belize               | Female | 70+ years        | 0.99 | 0.82 | 1.17 | 0 |
| 7  | Belize               | Female | Age-standardized | 1.08 | 0.93 | 1.23 | 0 |
| 8  | Belize               | Both   | All Ages         | 2.02 | 1.93 | 2.11 | 0 |
| 9  | Belize               | Both   | 15-49 years      | 1.35 | 1.22 | 1.48 | 0 |
| 10 | Belize               | Both   | 50-69 years      | 0.9  | 0.8  | 1    | 0 |
| 11 | Belize               | Both   | 70+ years        | 0.85 | 0.74 | 0.96 | 0 |
| 12 | Montenegro           | Both   | Age-standardized | 0.43 | 0.33 | 0.52 | 0 |
| 13 | United Arab Emirates | Male   | All Ages         | 2.27 | 2.21 | 2.34 | 0 |
| 14 | United Arab Emirates | Male   | 15-49 years      | 1.48 | 1.35 | 1.6  | 0 |
| 15 | United Arab Emirates | Male   | 50-69 years      | 1.04 | 1    | 1.07 | 0 |
| 16 | United Arab Emirates | Male   | 70+ years        | 0.83 | 0.79 | 0.88 | 0 |
| 17 | United Arab Emirates | Male   | Age-standardized | 1.12 | 1.08 | 1.16 | 0 |
| 18 | United Arab Emirates | Female | All Ages         | 3.3  | 3.22 | 3.38 | 0 |
| 19 | United Arab Emirates | Female | 15-49 years      | 2.02 | 1.9  | 2.15 | 0 |
| 20 | United Arab Emirates | Female | 50-69 years      | 1.35 | 1.27 | 1.43 | 0 |
| 21 | United Arab Emirates | Female | 70+ years        | 1.13 | 1.04 | 1.22 | 0 |
| 22 | United Arab Emirates | Female | Age-standardized | 1.39 | 1.3  | 1.48 | 0 |
| 23 | United Arab Emirates | Both   | All Ages         | 2.7  | 2.66 | 2.74 | 0 |
| 24 | United Arab Emirates | Both   | 15-49 years      | 1.7  | 1.58 | 1.81 | 0 |
| 25 | United Arab Emirates | Both   | 50-69 years      | 1.16 | 1.11 | 1.2  | 0 |
| 26 | United Arab Emirates | Both   | 70+ years        | 0.97 | 0.89 | 1.04 | 0 |
| 27 | Mongolia             | Both   | Age-standardized | 0.4  | 0.33 | 0.46 | 0 |
| 28 | Sierra Leone         | Male   | All Ages         | 0.51 | 0.39 | 0.63 | 0 |
| 29 | Sierra Leone         | Male   | 15-49 years      | 0.48 | 0.43 | 0.52 | 0 |
| 30 | Sierra Leone         | Male   | 50-69 years      | 0.57 | 0.53 | 0.6  | 0 |
| 31 | Sierra Leone         | Male   | 70+ years        | 0.6  | 0.57 | 0.63 | 0 |
| 32 | Sierra Leone         | Male   | Age-standardized | 0.62 | 0.6  | 0.65 | 0 |
| 33 | Sierra Leone         | Female | All Ages         | 0.21 | 0.13 | 0.29 | 0 |
| 34 | Sierra Leone         | Female | 15-49 years      | 0.19 | 0.13 | 0.24 | 0 |
| 35 | Sierra Leone         | Female | 50-69 years      | 0.25 | 0.21 | 0.29 | 0 |
| 36 | Sierra Leone         | Female | 70+ years        | 0.43 | 0.38 | 0.47 | 0 |
| 37 | Sierra Leone         | Female | Age-standardized | 0.32 | 0.28 | 0.36 | 0 |
| 38 | Sierra Leone         | Both   | All Ages         | 0.41 | 0.31 | 0.51 | 0 |
| 39 | Sierra Leone         | Both   | 15-49 years      | 0.4  | 0.36 | 0.45 | 0 |
| 40 | Sierra Leone         | Both   | 50-69 years      | 0.48 | 0.43 | 0.52 | 0 |
| 41 | Sierra Leone         | Both   | 70+ years        | 0.42 | 0.39 | 0.46 | 0 |
| 42 | Zambia               | Both   | Age-standardized | 0.39 | 0.36 | 0.43 | 0 |
| 43 | Mauritius            | Male   | All Ages         | 2.36 | 2.32 | 2.4  | 0 |
| 44 | Mauritius            | Male   | 15-49 years      | 1.55 | 1.45 | 1.65 | 0 |
| 45 | Mauritius            | Male   | 50-69 years      | 1.12 | 1.08 | 1.16 | 0 |
| 46 | Mauritius            | Male   | 70+ years        | 0.85 | 0.79 | 0.91 | 0 |
| 47 | Mauritius            | Male   | Age-standardized | 1.19 | 1.14 | 1.24 | 0 |
| 48 | Mauritius            | Female | All Ages         | 2.57 | 2.5  | 2.65 | 0 |
| 49 | Mauritius            | Female | 15-49 years      | 1.66 | 1.52 | 1.8  | 0 |
| 50 | Mauritius            | Female | 50-69 years      | 1.35 | 1.28 | 1.42 | 0 |
| 51 | Mauritius            | Female | 70+ years        | 1.19 | 1.11 | 1.28 | 0 |
| 52 | Mauritius            | Female | Age-standardized | 1.35 | 1.26 | 1.43 | 0 |
| 53 | Mauritius            | Both   | All Ages         | 2.46 | 2.4  | 2.51 | 0 |
| 54 | Mauritius            | Both   | 15-49 years      | 1.6  | 1.48 | 1.71 | 0 |
| 55 | Mauritius            | Both   | 50-69 years      | 1.24 | 1.19 | 1.28 | 0 |
| 56 | Mauritius            | Both   | 70+ years        | 1.04 | 0.97 | 1.11 | 0 |
| 57 | Comoros              | Both   | Age-standardized | 0.39 | 0.37 | 0.42 | 0 |

|    |             |        |                  |      |      |      |   |
|----|-------------|--------|------------------|------|------|------|---|
| 1  |             |        |                  |      |      |      |   |
| 2  | The Gambia  | Male   | All Ages         | 1.02 | 1    | 1.04 | 0 |
| 3  | The Gambia  | Male   | 15-49 years      | 0.76 | 0.72 | 0.8  | 0 |
| 4  | The Gambia  | Male   | 50-69 years      | 0.72 | 0.69 | 0.76 | 0 |
| 5  | The Gambia  | Male   | 70+ years        | 0.73 | 0.7  | 0.76 | 0 |
| 6  | The Gambia  | Male   | Age-standardized | 0.76 | 0.73 | 0.79 | 0 |
| 7  | The Gambia  | Female | All Ages         | 0.92 | 0.87 | 0.97 | 0 |
| 8  | The Gambia  | Female | 15-49 years      | 0.46 | 0.43 | 0.49 | 0 |
| 9  | The Gambia  | Female | 50-69 years      | 0.35 | 0.31 | 0.38 | 0 |
| 10 | The Gambia  | Female | 70+ years        | 0.51 | 0.48 | 0.53 | 0 |
| 11 | The Gambia  | Female | Age-standardized | 0.41 | 0.38 | 0.44 | 0 |
| 12 | The Gambia  | Both   | All Ages         | 0.96 | 0.94 | 0.98 | 0 |
| 13 | The Gambia  | Both   | 15-49 years      | 0.62 | 0.6  | 0.65 | 0 |
| 14 | The Gambia  | Both   | 50-69 years      | 0.47 | 0.45 | 0.5  | 0 |
| 15 | The Gambia  | Both   | 70+ years        | 0.53 | 0.5  | 0.56 | 0 |
| 16 | The Gambia  | Both   | Age-standardized | 0.37 | 0.33 | 0.41 | 0 |
| 17 | Madagascar  | Both   | Age-standardized | 0.37 | 0.33 | 0.41 | 0 |
| 18 | Cuba        | Male   | All Ages         | 2.02 | 1.93 | 2.11 | 0 |
| 19 | Cuba        | Male   | 15-49 years      | 1.6  | 1.53 | 1.67 | 0 |
| 20 | Cuba        | Male   | 50-69 years      | 1.03 | 0.94 | 1.12 | 0 |
| 21 | Cuba        | Male   | 70+ years        | 0.82 | 0.74 | 0.89 | 0 |
| 22 | Cuba        | Male   | Age-standardized | 1.08 | 0.99 | 1.18 | 0 |
| 23 | Cuba        | Female | All Ages         | 2.1  | 2.03 | 2.16 | 0 |
| 24 | Cuba        | Female | 15-49 years      | 1.52 | 1.45 | 1.6  | 0 |
| 25 | Cuba        | Female | 50-69 years      | 1.03 | 0.96 | 1.11 | 0 |
| 26 | Cuba        | Female | 70+ years        | 0.88 | 0.83 | 0.93 | 0 |
| 27 | Cuba        | Female | Age-standardized | 1.02 | 0.96 | 1.08 | 0 |
| 28 | Cuba        | Both   | All Ages         | 2.04 | 1.96 | 2.12 | 0 |
| 29 | Cuba        | Both   | 15-49 years      | 1.58 | 1.51 | 1.65 | 0 |
| 30 | Cuba        | Both   | 50-69 years      | 1.01 | 0.93 | 1.09 | 0 |
| 31 | Cuba        | Both   | 70+ years        | 0.81 | 0.75 | 0.88 | 0 |
| 32 | Cuba        | Both   | Age-standardized | 0.35 | 0.33 | 0.38 | 0 |
| 33 | South Sudan | Both   | Age-standardized | 0.35 | 0.33 | 0.38 | 0 |
| 34 | Timor-Leste | Male   | All Ages         | 0.98 | 0.93 | 1.04 | 0 |
| 35 | Timor-Leste | Male   | 15-49 years      | 0.42 | 0.4  | 0.43 | 0 |
| 36 | Timor-Leste | Male   | 50-69 years      | 0.62 | 0.59 | 0.66 | 0 |
| 37 | Timor-Leste | Male   | 70+ years        | 0.5  | 0.49 | 0.52 | 0 |
| 38 | Timor-Leste | Male   | Age-standardized | 0.56 | 0.53 | 0.59 | 0 |
| 39 | Timor-Leste | Female | All Ages         | 1.21 | 1.13 | 1.29 | 0 |
| 40 | Timor-Leste | Female | 15-49 years      | 0.42 | 0.37 | 0.47 | 0 |
| 41 | Timor-Leste | Female | 50-69 years      | 0.92 | 0.89 | 0.95 | 0 |
| 42 | Timor-Leste | Female | 70+ years        | 0.81 | 0.79 | 0.83 | 0 |
| 43 | Timor-Leste | Female | Age-standardized | 0.8  | 0.77 | 0.83 | 0 |
| 44 | Timor-Leste | Both   | All Ages         | 1.07 | 1.01 | 1.14 | 0 |
| 45 | Timor-Leste | Both   | 15-49 years      | 0.41 | 0.38 | 0.43 | 0 |
| 46 | Timor-Leste | Both   | 50-69 years      | 0.73 | 0.7  | 0.76 | 0 |
| 47 | Timor-Leste | Both   | 70+ years        | 0.61 | 0.59 | 0.63 | 0 |
| 48 | Timor-Leste | Both   | Age-standardized | 0.34 | 0.22 | 0.46 | 0 |
| 49 | Nigeria     | Both   | Age-standardized | 0.34 | 0.22 | 0.46 | 0 |
| 50 | Bangladesh  | Male   | All Ages         | 2.53 | 2.38 | 2.68 | 0 |
| 51 | Bangladesh  | Male   | 15-49 years      | 1.43 | 1.35 | 1.51 | 0 |
| 52 | Bangladesh  | Male   | 50-69 years      | 1.13 | 1.04 | 1.21 | 0 |
| 53 | Bangladesh  | Male   | 70+ years        | 1.22 | 1.13 | 1.31 | 0 |
| 54 | Bangladesh  | Male   | Age-standardized | 1.18 | 1.09 | 1.27 | 0 |
| 55 | Bangladesh  | Female | All Ages         | 2.6  | 2.44 | 2.75 | 0 |
| 56 | Bangladesh  | Female | 15-49 years      | 1.5  | 1.39 | 1.61 | 0 |
| 57 | Bangladesh  | Female | 50-69 years      | 1.04 | 0.94 | 1.15 | 0 |
| 58 | Bangladesh  | Female | 70+ years        | 1.29 | 1.18 | 1.4  | 0 |
| 59 | Bangladesh  | Female | Age-standardized | 1.1  | 1.01 | 1.2  | 0 |
| 60 | Bangladesh  | Both   | All Ages         | 2.52 | 2.37 | 2.66 | 0 |

|    |                            |        |                  |       |       |       |       |
|----|----------------------------|--------|------------------|-------|-------|-------|-------|
| 1  |                            |        |                  |       |       |       |       |
| 2  | Bangladesh                 | Both   | 15-49 years      | 1.4   | 1.32  | 1.49  | 0     |
| 3  | Bangladesh                 | Both   | 50-69 years      | 1.05  | 0.97  | 1.13  | 0     |
| 4  | Bangladesh                 | Both   | 70+ years        | 1.2   | 1.11  | 1.29  | 0     |
| 5  | Burundi                    | Both   | Age-standardized | 0.33  | 0.31  | 0.36  | 0     |
| 6  | Hungary                    | Male   | All Ages         | 0.8   | 0.78  | 0.83  | 0     |
| 7  | Hungary                    | Male   | 15-49 years      | 0.57  | 0.5   | 0.64  | 0     |
| 8  | Hungary                    | Male   | 50-69 years      | -0.02 | -0.09 | 0.05  | 0.554 |
| 9  | Hungary                    | Male   | 70+ years        | 0.24  | 0.19  | 0.3   | 0     |
| 10 | Hungary                    | Male   | Age-standardized | 0.24  | 0.22  | 0.27  | 0     |
| 11 | Hungary                    | Female | All Ages         | 1.47  | 1.44  | 1.51  | 0     |
| 12 | Hungary                    | Female | 15-49 years      | 0.8   | 0.73  | 0.87  | 0     |
| 13 | Hungary                    | Female | 50-69 years      | 0.85  | 0.77  | 0.93  | 0     |
| 14 | Hungary                    | Female | 70+ years        | 0.87  | 0.84  | 0.91  | 0     |
| 15 | Hungary                    | Female | Age-standardized | 0.76  | 0.72  | 0.8   | 0     |
| 16 | Hungary                    | Both   | All Ages         | 1.09  | 1.06  | 1.13  | 0     |
| 17 | Hungary                    | Both   | 15-49 years      | 0.66  | 0.59  | 0.73  | 0     |
| 18 | Hungary                    | Both   | 50-69 years      | 0.4   | 0.32  | 0.47  | 0     |
| 19 | Hungary                    | Both   | 70+ years        | 0.57  | 0.55  | 0.6   | 0     |
| 20 | Hungary                    | Both   | Age-standardized | 0.3   | 0.22  | 0.38  | 0     |
| 21 | Slovakia                   | Both   | Age-standardized | 0.3   | 0.22  | 0.38  | 0     |
| 22 | Ghana                      | Male   | All Ages         | 1.99  | 1.95  | 2.04  | 0     |
| 23 | Ghana                      | Male   | 15-49 years      | 1.6   | 1.56  | 1.65  | 0     |
| 24 | Ghana                      | Male   | 50-69 years      | 1.44  | 1.4   | 1.48  | 0     |
| 25 | Ghana                      | Male   | 70+ years        | 1.45  | 1.4   | 1.5   | 0     |
| 26 | Ghana                      | Male   | Age-standardized | 1.51  | 1.46  | 1.55  | 0     |
| 27 | Ghana                      | Female | All Ages         | 1.79  | 1.74  | 1.84  | 0     |
| 28 | Ghana                      | Female | 15-49 years      | 1.3   | 1.23  | 1.37  | 0     |
| 29 | Ghana                      | Female | 50-69 years      | 1.1   | 1.06  | 1.14  | 0     |
| 30 | Ghana                      | Female | 70+ years        | 1.28  | 1.23  | 1.33  | 0     |
| 31 | Ghana                      | Female | Age-standardized | 1.19  | 1.14  | 1.24  | 0     |
| 32 | Ghana                      | Both   | All Ages         | 1.89  | 1.85  | 1.94  | 0     |
| 33 | Ghana                      | Both   | 15-49 years      | 1.47  | 1.41  | 1.52  | 0     |
| 34 | Ghana                      | Both   | 50-69 years      | 1.24  | 1.2   | 1.28  | 0     |
| 35 | Ghana                      | Both   | 70+ years        | 1.28  | 1.23  | 1.33  | 0     |
| 36 | Ghana                      | Both   | Age-standardized | 0.29  | 0.23  | 0.35  | 0     |
| 37 | Somalia                    | Both   | Age-standardized | 0.29  | 0.23  | 0.35  | 0     |
| 38 | Mozambique                 | Male   | All Ages         | 0.42  | 0.36  | 0.49  | 0     |
| 39 | Mozambique                 | Male   | 15-49 years      | 0.74  | 0.65  | 0.82  | 0     |
| 40 | Mozambique                 | Male   | 50-69 years      | 0.66  | 0.61  | 0.71  | 0     |
| 41 | Mozambique                 | Male   | 70+ years        | 0.7   | 0.65  | 0.75  | 0     |
| 42 | Mozambique                 | Male   | Age-standardized | 0.7   | 0.65  | 0.75  | 0     |
| 43 | Mozambique                 | Female | All Ages         | -0.11 | -0.19 | -0.03 | 0.009 |
| 44 | Mozambique                 | Female | 15-49 years      | 0.11  | 0.03  | 0.19  | 0.013 |
| 45 | Mozambique                 | Female | 50-69 years      | 0.07  | 0.03  | 0.11  | 0.001 |
| 46 | Mozambique                 | Female | 70+ years        | 0.2   | 0.15  | 0.25  | 0     |
| 47 | Mozambique                 | Female | Age-standardized | 0.12  | 0.08  | 0.17  | 0     |
| 48 | Mozambique                 | Both   | All Ages         | 0.21  | 0.15  | 0.28  | 0     |
| 49 | Mozambique                 | Both   | 15-49 years      | 0.5   | 0.41  | 0.59  | 0     |
| 50 | Mozambique                 | Both   | 50-69 years      | 0.38  | 0.34  | 0.43  | 0     |
| 51 | Mozambique                 | Both   | 70+ years        | 0.34  | 0.29  | 0.38  | 0     |
| 52 | Mozambique                 | Both   | Age-standardized | 0.28  | 0.19  | 0.37  | 0     |
| 53 | Democratic Republic of the | Both   | Age-standardized | 0.28  | 0.19  | 0.37  | 0     |
| 54 |                            |        |                  |       |       |       |       |
| 55 |                            |        |                  |       |       |       |       |
| 56 |                            |        |                  |       |       |       |       |
| 57 |                            |        |                  |       |       |       |       |
| 58 |                            |        |                  |       |       |       |       |
| 59 |                            |        |                  |       |       |       |       |
| 60 |                            |        |                  |       |       |       |       |



STROBE Statement—Checklist of items that should be included in reports of *cohort studies*

|                           | Item No | Recommendation                                                                                                                                                                                                                                                                                                         | Page No |
|---------------------------|---------|------------------------------------------------------------------------------------------------------------------------------------------------------------------------------------------------------------------------------------------------------------------------------------------------------------------------|---------|
| <b>Title and abstract</b> | 1       | (a) Indicate the study's design with a commonly used term in the title or the abstract<br>(b) Provide in the abstract an informative and balanced summary of what was done and what was found                                                                                                                          | 1, 2    |
| <b>Introduction</b>       |         |                                                                                                                                                                                                                                                                                                                        |         |
| Background/rationale      | 2       | Explain the scientific background and rationale for the investigation being reported                                                                                                                                                                                                                                   | 3       |
| Objectives                | 3       | State specific objectives, including any prespecified hypotheses                                                                                                                                                                                                                                                       | 3       |
| <b>Methods</b>            |         |                                                                                                                                                                                                                                                                                                                        |         |
| Study design              | 4       | Present key elements of study design early in the paper                                                                                                                                                                                                                                                                | 4       |
| Setting                   | 5       | Describe the setting, locations, and relevant dates, including periods of recruitment, exposure, follow-up, and data collection                                                                                                                                                                                        | 4       |
| Participants              | 6       | (a) Give the eligibility criteria, and the sources and methods of selection of participants. Describe methods of follow-up<br>(b) For matched studies, give matching criteria and number of exposed and unexposed                                                                                                      | 4       |
| Variables                 | 7       | Clearly define all outcomes, exposures, predictors, potential confounders, and effect modifiers. Give diagnostic criteria, if applicable                                                                                                                                                                               | 4       |
| Data sources/measurement  | 8*      | For each variable of interest, give sources of data and details of methods of assessment (measurement). Describe comparability of assessment methods if there is more than one group                                                                                                                                   | 4       |
| Bias                      | 9       | Describe any efforts to address potential sources of bias                                                                                                                                                                                                                                                              | 4       |
| Study size                | 10      | Explain how the study size was arrived at                                                                                                                                                                                                                                                                              | 4       |
| Quantitative variables    | 11      | Explain how quantitative variables were handled in the analyses. If applicable, describe which groupings were chosen and why                                                                                                                                                                                           | 4       |
| Statistical methods       | 12      | (a) Describe all statistical methods, including those used to control for confounding<br>(b) Describe any methods used to examine subgroups and interactions<br>(c) Explain how missing data were addressed<br>(d) If applicable, explain how loss to follow-up was addressed<br>(e) Describe any sensitivity analyses | 4       |
| <b>Results</b>            |         |                                                                                                                                                                                                                                                                                                                        |         |
| Participants              | 13*     | (a) Report numbers of individuals at each stage of study—eg numbers potentially eligible, examined for eligibility, confirmed eligible, included in the study, completing follow-up, and analysed<br>(b) Give reasons for non-participation at each stage<br>(c) Consider use of a flow diagram                        | 5       |
| Descriptive data          | 14*     | (a) Give characteristics of study participants (eg demographic, clinical, social) and information on exposures and potential confounders<br>(b) Indicate number of participants with missing data for each variable of interest<br>(c) Summarise follow-up time (eg, average and total amount)                         | 5       |
| Outcome data              | 15*     | Report numbers of outcome events or summary measures over time                                                                                                                                                                                                                                                         | 6       |



|    |                          |                                                                                                                  |                                                                                                                                                                                                              |     |
|----|--------------------------|------------------------------------------------------------------------------------------------------------------|--------------------------------------------------------------------------------------------------------------------------------------------------------------------------------------------------------------|-----|
| 1  | Main results             | 16                                                                                                               | (a) Give unadjusted estimates and, if applicable, confounder-adjusted estimates and their precision (eg, 95% confidence interval). Make clear which confounders were adjusted for and why they were included | 5-6 |
| 2  |                          | (b) Report category boundaries when continuous variables were categorized                                        |                                                                                                                                                                                                              |     |
| 3  |                          | (c) If relevant, consider translating estimates of relative risk into absolute risk for a meaningful time period |                                                                                                                                                                                                              |     |
| 4  | Other analyses           | 17                                                                                                               | Report other analyses done—eg analyses of subgroups and interactions, and sensitivity analyses                                                                                                               |     |
| 5  | <b>Discussion</b>        |                                                                                                                  |                                                                                                                                                                                                              |     |
| 6  | Key results              | 18                                                                                                               | Summarise key results with reference to study objectives                                                                                                                                                     | 6   |
| 7  | Limitations              | 19                                                                                                               | Discuss limitations of the study, taking into account sources of potential bias or imprecision. Discuss both direction and magnitude of any potential bias                                                   | 8   |
| 8  | Interpretation           | 20                                                                                                               | Give a cautious overall interpretation of results considering objectives, limitations, multiplicity of analyses, results from similar studies, and other relevant evidence                                   | 7-8 |
| 9  | Generalisability         | 21                                                                                                               | Discuss the generalisability (external validity) of the study results                                                                                                                                        | 7   |
| 10 | <b>Other information</b> |                                                                                                                  |                                                                                                                                                                                                              |     |
| 11 | Funding                  | 22                                                                                                               | Give the source of funding and the role of the funders for the present study and, if applicable, for the original study on which the present article is based                                                | 1   |

\*Give information separately for exposed and unexposed groups.

**Note:** An Explanation and Elaboration article discusses each checklist item and gives methodological background and published examples of transparent reporting. The STROBE checklist is best used in conjunction with this article (freely available on the Web sites of PLoS Medicine at <http://www.plosmedicine.org/>, Annals of Internal Medicine at <http://www.annals.org/>, and Epidemiology at <http://www.epidem.com/>). Information on the STROBE Initiative is available at <http://www.strobe-statement.org>.

# BMJ Open

## Prevalence trend of nonalcoholic fatty liver disease at the global, regional, and national level, 1990-2017: a population-based observational study

|                                 |                                                                                                                                                                                                                                                                                                                                                                                          |
|---------------------------------|------------------------------------------------------------------------------------------------------------------------------------------------------------------------------------------------------------------------------------------------------------------------------------------------------------------------------------------------------------------------------------------|
| Journal:                        | <i>BMJ Open</i>                                                                                                                                                                                                                                                                                                                                                                          |
| Manuscript ID                   | bmjopen-2019-036663.R1                                                                                                                                                                                                                                                                                                                                                                   |
| Article Type:                   | Original research                                                                                                                                                                                                                                                                                                                                                                        |
| Date Submitted by the Author:   | 23-Mar-2020                                                                                                                                                                                                                                                                                                                                                                              |
| Complete List of Authors:       | Ge, Xiaojun; Zunyi Medical University, Department of Laboratory Medicine<br>Zheng, Limei; Zunyi Medical University, Department of Laboratory Medicine<br>Wang, Mei; Zunyi Medical University, Department of Laboratory Medicine<br>Du, Yuxuan; Zunyi Medical University, Department of Laboratory Medicine<br>Jiang, Junyao; Zunyi Medical University, Department of Laboratory Medicine |
| <b>Primary Subject Heading</b>: | Epidemiology                                                                                                                                                                                                                                                                                                                                                                             |
| Secondary Subject Heading:      | Gastroenterology and hepatology, Global health, Health informatics, Public health                                                                                                                                                                                                                                                                                                        |
| Keywords:                       | EPIDEMIOLOGY, Adult gastroenterology < GASTROENTEROLOGY, Hepatobiliary disease < GASTROENTEROLOGY                                                                                                                                                                                                                                                                                        |
|                                 |                                                                                                                                                                                                                                                                                                                                                                                          |

SCHOLARONE™  
Manuscripts

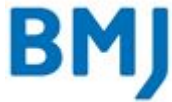

I, the Submitting Author has the right to grant and does grant on behalf of all authors of the Work (as defined in the below author licence), an exclusive licence and/or a non-exclusive licence for contributions from authors who are: i) UK Crown employees; ii) where BMJ has agreed a CC-BY licence shall apply, and/or iii) in accordance with the terms applicable for US Federal Government officers or employees acting as part of their official duties; on a worldwide, perpetual, irrevocable, royalty-free basis to BMJ Publishing Group Ltd ("BMJ") its licensees and where the relevant Journal is co-owned by BMJ to the co-owners of the Journal, to publish the Work in this journal and any other BMJ products and to exploit all rights, as set out in our [licence](#).

The Submitting Author accepts and understands that any supply made under these terms is made by BMJ to the Submitting Author unless you are acting as an employee on behalf of your employer or a postgraduate student of an affiliated institution which is paying any applicable article publishing charge ("APC") for Open Access articles. Where the Submitting Author wishes to make the Work available on an Open Access basis (and intends to pay the relevant APC), the terms of reuse of such Open Access shall be governed by a Creative Commons licence – details of these licences and which [Creative Commons](#) licence will apply to this Work are set out in our licence referred to above.

Other than as permitted in any relevant BMJ Author's Self Archiving Policies, I confirm this Work has not been accepted for publication elsewhere, is not being considered for publication elsewhere and does not duplicate material already published. I confirm all authors consent to publication of this Work and authorise the granting of this licence.

**Original article****Prevalence trend of nonalcoholic fatty liver disease at the global, regional, and national level, 1990-2017: a population-based observational study**Xiao-jun Ge<sup>1\*</sup>, Li-mei Zheng<sup>1\*</sup>, Mei Wang<sup>1</sup>, Yu-Xuan Du<sup>1</sup>, Jun-Yao Jiang<sup>1</sup>

1. Department of Laboratory Medicine, The Second Affiliated Hospital of Zunyi Medical University, Zunyi, Guizhou, 563000

\* These authors contributed equally

Corresponding author: Xiao-jun Ge, Department of Laboratory Medicine, The Second Affiliated Hospital of Zunyi Medical University, Zunyi, Guizhou, 563000, China.

Tel:+86-15338526285

Fax:+86-0851-27596297

E-mail: gxj\_199421@126.com

**Running title:** Global prevalence of NAFLD

**Abbreviations:** NAFLD, Nonalcoholic fatty liver disease; EAPC, estimated average percentage change; GBD, global burden of disease.

**Contributors:** Study conception and design: J.J., X.G., and M.W.; Data collection: X.G., Y.D., and L.Z.; Data analyses: X.G., Y.D., and L.Z.; Results interpretations: All authors; Manuscript drafting: X.G., L.Z., and Y.D.; Manuscript proofing: All authors.

**Funding**

The present study was supported by the National Natural Science Foundation of China (grant no. 81560487).

**Ethical approval:** Approval of the study by the National Center of Health and Statistics Research ethics review board was waived because the research relied on public,

deidentified secondary data.

**Patient and public involvement:** No patient involved.

## Abstract

**Objectives** Nonalcoholic fatty liver disease (NAFLD) is the leading cause of end-stage liver diseases. Knowing the NAFLD prevalence and quantifying its temporal trends at the global, regional, and national level is critical to understand the NAFLD disease burden and to establish more tailored prevention strategies.

**Design** Population-based observational study

**Setting** The global, 21 regions, and 195 countries or territories.

**Main outcomes measure** The estimated annual percentage change (EAPC) of prevalence of NAFLD

**Results** Worldwide, the prevalent case number of NAFLD increased from 391.2 million in 1990 to 882.1 million in 2017, with the prevalence rate increased from 8.2% to 10.9% during this period. The increasing trend was consistent in both sexes. The prevalent case number was highest in East Asia, followed by South Asia and North African and Middle East. The highest NAFLD prevalence was observed in North African and Middle East. Whereas the greatest increase was detected in Western Europe, followed by Tropical Latin America and High-income North America.

**Conclusions** Nearly all countries or territories experienced a significant increase in NAFLD prevalence. The greatest increase was observed in Oman. Approximately all countries were shown a significant increasing trend in NAFLD prevalence over the last three decades. The extensive increase alarmed us that NAFLD has emerged as a new public health concern worldwide and more efficient prevention strategies are urgently needed.

**Key words:** NAFLD; global; prevalence; liver disease; increase.

## Strengths and limitations of this study

- Our study comprehensively investigated the temporal trends of NAFLD prevalence at the global, regional, and national level.
- Our results provided insights to understand the NAFLD disease burden.
- All data used in our study were derived from mathematical estimates rather than surveillance data.

## Introduction

Over the last three decades, nonalcoholic fatty liver disease (NAFLD) has gone from an obscure liver disease to the most prominent chronic liver disease worldwide<sup>1,2</sup>. It is a growing cause of end-stage liver disease and is recognized as an etiology of hepatocellular cancer (HCC), even in the absence of underlying cirrhosis<sup>3</sup>. NAFLD is highly prevalent in nearly all continents and is geographically heterogeneous in its prevalence from country to country. For example, it is reported that the highest rates were found in South America and the Middle East, followed by Asia, the USA, and Europe, whereas NAFLD is less common in Africa<sup>4</sup>.

In line with the worldwide increase of obesity and type 2 diabetes<sup>5,6</sup>, NAFLD has shown novel epidemic in both developed countries and developing countries in recent years. Knowing the temporal trends of NAFLD prevalence is of importance to better understand the disease burden of NAFLD and is indicative for its prevention. Previous studies were either focused on individual region or limited to a short period<sup>3,7,8</sup>. Fortunately, the Global Burden of Disease (GBD) study, which provides a tool to quantify health loss from hundreds of diseases, injuries, and risk factors, fills a gap where actual data on disease burden is sparse or unavailable and provides us an unprecedented opportunity to learn the epidemiology of NAFLD. In the current study, we used the data from GBD study to comprehensively describe the NAFLD prevalence and quantify its temporal trends between 1990 and 2017 at the global, regional, and national level. Our results are instrumental in raising the understanding of NAFLD and



91 subsequently are informative for establishing the up-dated prevention strategies.

92

### 93 **Materials and methods**

94 The prevalence data of NAFLD, by sex, region, and age, were retrieved from the online  
95 Global Health Data Exchange (GHDx) query tool <sup>9</sup>. Data from 5 socio-demographic  
96 index (SDI) regions (i.e., low, low-middle, middle, high-middle, and high), 21 GBD  
97 regions which were defined by geography (e.g., East Asia), and a total of 195 countries  
98 and territories were available. SDI is a composite average of the rankings of the incomes  
99 per capita, average educational attainment, and fertility rates of all areas in the GBD  
100 study. The general methods for estimates in GBD have been detailed in the previous  
101 studies <sup>10</sup>. NAFLD is an umbrella term for a range of liver conditions affecting people  
102 who drink little to no alcohol and identifies by ICD10 code K76.0. The prevalence of  
103 NAFLD was estimated by a systematic literature review in PubMed and then modelled  
104 by DisMod-MR 2.1 models. The following inclusion criteria were used: 1) sample size  
105 greater than 100; 2) representative of locale or area and sufficient methods; 3) does not  
106 exclude comorbidities; 4) NAFLD diagnosed by ultrasound (USS) or other imaging  
107 diagnostic. Any hospital and claims data which severely underestimated NAFLD  
108 prevalence were excluded. Data were outliered or excluded if we found they differed  
109 significantly when compared to regional, super-regional, and global rates. Studies using  
110 serum diagnostics or fatty liver indexes and scores to diagnose NAFLD were excluded  
111 as well. We also retrieved the data of the national human development index (HDI), a  
112 composite index measuring average achievement in three basic dimensions of human  
113 development—a long and healthy life, knowledge and a decent standard of living, from  
114 the World Bank ([www.worldbank.org](http://www.worldbank.org)). To assess the secular trends of risk factors for  
115 NAFLD, we retrieved the prevalence data of type II diabetes from GBD online database  
116 and obesity (or overweight) prevalence data from World Health Organization (WHO)  
117 (<http://apps.who.int/gho/data/view.main.GLOBAL2461A?lang=en>). The obesity  
118 dataset presents estimates of the prevalence of overweight men and women aged 18 and  
119 above by country, region, and globally. A person is defined as overweight if they have  
120 a body-mass index (BMI) equal to or greater than 25. BMI is a person's weight in

121 kilograms divided by his or her height in metres squared. Data between 1990 and 2016  
122 were retrieved.

123  
124 The estimated annual percentage change (EAPC) was used to quantify the trends in the  
125 prevalence of NAFLD, stratified by sex, nation, and age, from 1990 to 2017. As  
126 described elsewhere, EAPC can be calculated by a regression line, which was fitted to  
127 the natural logarithm of the rates, i.e.,  $y = \alpha + \beta x + \varepsilon$ , where  $y = \ln(\text{rate})$ , and  $x =$   
128 calendar year<sup>11</sup>. All statistical analyses were performed using the R program (Version  
129 3.3.3, R core team, Vienna, Austria). A  $P$ -value less than 0.05 was considered  
130 statistically significant.

## 131 132 **Results**

### 133 *Prevalent case number and prevalence of NAFLD at the global level*

134 Worldwide, the prevalent case number of NAFLD increased from 391.2 million in 1990  
135 to 882.1 million in 2017, with the prevalence rate increased from 8.2% to 10.9% during  
136 this period (EAPC = 1.05, 95% CI 1.04, 1.07,  $P < 0.001$ ) (Table; Figures 1, 2). Males  
137 accounted for approximately 2/3 of the total cases. Whereas females experienced a  
138 greater increase in NAFLD prevalence than males (Table). All five SDI-regions were  
139 increased in both NAFLD prevalent case number and prevalence rate. The most  
140 pronounced increase was found in high-middle SDI region, in which the prevalence  
141 was the highest in 2017 (Table; Figures 1, 2). The increasing trends in both the NAFLD  
142 prevalent case number and prevalence rate were consistent in population with different  
143 ages. The younger people (aged 15-49 years) accounted for nearly 50% of the total  
144 cases and experienced the greatest increase in NAFLD prevalence between 1990 and  
145 2017 (EAPC = 1.25, 95% CI 1.22, 1.28,  $P < 0.001$ ) (Table).

### 147 *Prevalent case number and prevalence of NAFLD at the regional level*

148 A total of 21 GBD regions were included in this analysis. The prevalent case number  
149 was highest in East Asia, followed by South Asia and North African and Middle East.  
150 In these three regions, the absolute case numbers were exceeded 0.1 billion in 2017.

1  
2  
3  
4 151 The highest NAFLD prevalence was observed in North African and Middle East  
5 152 (19.3%), followed by Oceania, Southeast Asia, and Central Latin America (Table).  
6  
7 153 Between 1990 and 2017, all 21 regions were experienced a significant increase in  
8  
9 154 NAFLD prevalence (Figure 3). The greatest increase was detected in Western Europe,  
10  
11 155 followed by Tropical Latin America and High-income North America (Table; Figure3).  
12  
13  
14 156

### 157 ***Prevalent case number and prevalence of NAFLD at the national level***

158 Globally, the NAFLD prevalence varied from country to country, ranged from 5.2% in  
159 Rwanda to 24.9% in Qatar in 2017 (Figure 4A). The highest prevalence rates were  
160 observed in Qatar, Kuwait, Saudi Arabia, and Oman. The relatively lower prevalence  
161 was found in parts of Africa and Europe, including Uganda, Mozambique, France, and  
162 Denmark. China, India, Indonesia, Brazil, and the USA carried the heaviest burden of  
163 NAFLD in terms of absolute number of cases. The case numbers were above 20 million  
164 in these five countries (Figure 4B). Between 1990 and 2017, nearly all countries or  
165 territories experienced a significant increase in NAFLD prevalence (Figure 4C). The  
166 greatest increase was observed in Oman (EAPC = 2.12, 95% CI 1.97, 2.26,  $P < 0.001$ ),  
167 followed by Finland, Equatorial Guinea, and Nicaragua (Figure 4C; S-Table). Only one  
168 country (i.e., Bulgaria) remained stable in NAFLD prevalence during the study period.  
169 The increasing trend was consistent between both sexes and among all three age groups  
170 at the national level (S-Table).  
171

### 172 ***Correlations between NAFLD prevalence and that of risk factors***

173 We assessed the correlations of NAFLD prevalence with prevalence of overweight and  
174 diabetes at the national level (Figure S1). Significant positive correlations were detected,  
175 with the  $\rho$  of 0.664 and 0.354, respectively. We also tested the correlations of EAPCs  
176 of NAFLD prevalence with HDIs at the national level. As shown in Figure 5A, we  
177 found a significantly positive correlation between these two indexes ( $\rho = 0.310$ ,  $P <$   
178 0.001). Over the last three decades, more than 90% and 80% of countries or territories  
179 experienced a significant increase in overweight prevalence and diabetes prevalence,  
180 respectively. The positive correlation pattern was observed between temporal trends of

181 NAFLD and that of overweight and diabetes (Figure 5B, C).

182

### 183 **Discussion**

184 Nonalcoholic fatty liver disease (NAFLD) and its histological subtype nonalcoholic  
185 steatohepatitis (NASH) have emerged as the most common form of chronic liver  
186 disease in most regions of the world. In the present study, we comprehensively  
187 described the NAFLD prevalence along with its temporal trends over the last three  
188 decades at the global, regional, and national level. In general, we found that NAFLD  
189 prevalence was heterogeneous across the world, whereas approximately all countries  
190 were shown a significant increasing trend over the last three decades. This increase was  
191 consistent between both sexes and among populations with different ages. The highest  
192 prevalence was mostly observed in countries located in North Africa and Middle East.  
193 The most pronounced increase in prevalence was mainly found in countries located in  
194 Western Europe.

195

196 According to a recent study, the estimated prevalence of overweight was highest in  
197 several countries in North Africa and Middle East (e.g., Qatar, Libya, and Kuwait) in  
198 both sexes<sup>6</sup>. The distribution of overweight is highly in line with the NAFLD  
199 prevalence, as shown in our study and elsewhere<sup>12</sup>. The greatest increase in NAFLD  
200 prevalence was found in Western Europe, which might be mainly ascribed to the rapid  
201 increase in overweight in these countries<sup>6</sup>. The striking increase in NAFLD prevalence  
202 has prompted investigators to explore its risk factors. So far, the well-determined risk  
203 factors for NAFLD include obesity, type 2 diabetes, unhealthy diet (e.g., high intake of  
204 red and processed meat), and physical inactivity<sup>13-17</sup>. Among them, unhealthy lifestyle  
205 is deemed to be the most important contributor driving the epidemic of NAFLD<sup>18</sup>. Key  
206 lifestyle parameters, such as an increased intake of glucose, fructose, and saturated fat,  
207 induce hepatic de-novo lipogenesis, subclinical inflammation in adipose tissue and liver,  
208 and insulin resistance in adipose tissue, the liver, and skeletal muscle. These lifestyle  
209 parameters are also accompanied by an increased risk of type 2 diabetes<sup>19</sup>.

210

211 Additionally, gut dysbiosis, majorly induced by an unhealthy diet, is believed to  
212 contribute to the accumulation of fat in the liver and the pathogenesis of NASH. In the  
213 presence of dysbiosis, bacteria-derived products can induce adipose tissue  
214 inflammation, hepatic steatosis, and hepatic inflammation<sup>20</sup>. Genome-wide association  
215 and exome-sequencing studies have also provided robust evidence that genetic  
216 variability in *PNPLA3*, *TM6SF2*, *MBOAT7*, *GCKR*, *HSD17B13*, and other genes is  
217 associated with susceptibility to and progression of NAFLD<sup>21</sup>. Fatty acids are primarily  
218 delivered to the liver from blood following lipolysis of triglyceride in adipose tissue, a  
219 process that is regulated by the actions of insulin on adipocytes. Impaired postreceptor  
220 signaling by insulin (i.e., insulin resistance) in adipose tissue contributes to NASH  
221 through dysregulated lipolysis resulting in excessive delivery of fatty acids to the liver  
222<sup>22</sup>. The second major source of fatty acids is their synthesis from glucose and fructose  
223 by de novo lipogenesis (DNL), and a stable isotope study demonstrated that the increase  
224 in hepatic lipid content in patients with NAFLD is largely attributable to DNL  
225<sup>23</sup>. Although enormous efforts have been made and remarkable achievements have been  
226 obtained in understanding the etiology and pathology of NAFLD, there is still lack of  
227 efficient therapy to cure NAFLD<sup>24</sup>. Currently, there are a set of clinical trials are under  
228 way. These trials are focusing on liver-specific targets and extrahepatic targets include  
229 the microbiome and gut–liver signaling axis as well as other organs that contribute to  
230 metabolic syndrome, especially muscle and adipose tissue<sup>25</sup>. Although activity in drug  
231 development for NASH is intense and advancing rapidly, such as an FXR agonist  
232 (obeticholic acid), a PPAR $\alpha$  and PPAR $\delta$  agonist (elafibrinor) and a CCR2 and CCR5  
233 antagonist (cencriviroc), it is too early to prioritize those drugs or mechanisms that are  
234 most promising. All these findings will need to translate into durable safety and efficacy  
235<sup>25</sup>. Primary prevention for the risk factors, such as adherence of healthy lifestyle and  
236 abstaining from overweight, is therefore the optimal approach to prevent NAFLD.  
237  
238 In our study, we found that approximately 0.9 billion people are afflicted by NAFLD  
239 in 2017. What clearly sets NAFLD apart from other common liver diseases is the sheer  
240 volume of patients. Unfortunately, we also observed an increasing trend in NAFLD

prevalence around the world. Consequently, the complications and sequelae of NAFLD might be on the rise as well. For example, the increasing prevalence of NAFLD is accompanying the increasing prevalence of other non-communicable diseases, including cardiovascular disease, obesity-associated and type 2 diabetes-associated cancer, and advanced liver diseases such as hepatic cirrhosis and HCC<sup>26</sup>. As the clinical consequences of NAFLD grow, the economic consequences will also increase. A model on the population of US and of four European countries (Germany, France, Italy and the UK) estimated the annual burden associated with all incident and prevalent NAFLD cases at US\$103 billion in the USA (\$1,613 per patient) and at € 35 billion in the four Europe countries (from € 354 to € 1,163 per patient)<sup>27</sup>. Unfortunately, as shown in our results, we found significant increases in both obesity and diabetes prevalence in most countries over the last decade. In combination of ageing population, if the annual rate of increase in the costs related to NAFLD is assumed to parallel the annual growth in the prevalence of obesity, the expected 10-year burden of NAFLD could increase to an estimated \$1.005 trillion in the USA and € 334 billion in the Europe<sup>27</sup>. Interestingly, we also found a significantly positive correlation between national HDI and increase magnitude of NAFLD prevalence. This result suggests a striking increase of NAFLD risk factors, particularly in the developed countries. For example, the expansion of ageing population, physical inactivity, intake of red and processed meat, and other unhealthy lifestyles are contributors to NAFLD<sup>16, 28</sup>. In the context of increasing prevalence of obesity and diabetes, the NAFLD prevalence was anticipated to further increase in the near future, if no effective interventions are introduced<sup>3</sup>. Moreover, the persistent increment of NAFLD also indicates the development of medical facility and health system in these countries. More NAFLD patients were timely diagnosed.

The NAFLD prevalence was also persistently increased in developing regions, e.g., the sub-Saharan Africa, in which the NAFLD was previously less diagnosed. This increase might be ascribed to the increasing availability of health care and the resultantly rising NAFLD detection rate, and more importantly, to the transitions in lifestyle. Rising awareness and urgent actions need to be taken in order to control the NAFLD pandemic



worldwide. Specifically, 1) our governments should play a strong leadership role in reinforcing the importance of addressing the obesity problem and establishing more effective prevention strategies to combat it; 2) funds should be allocated specifically to change the environment to one that promotes healthful eating and an active lifestyle, especially for children and adolescents; 3) multifaceted interventions aimed at motivating behavioral changes, including setting-based (e.g., preschools, schools, workplaces, religious settings, and hospitals) health promotion and education programs, mass media campaigns, social marketing to improve the knowledge and skills of the community and individuals, and routine primary health care and counseling to facilitate obesity prevention and management, are needed <sup>29</sup>.

The limitations of our study should be noted. First, the data we used were derived from mathematical models rather than surveillance data. The differences in data processing approaches between GBD study and previous studies might contribute to the disparities in NAFLD prevalence in our study in contrast to that from previous meta-analyses <sup>4,30</sup>. For example, Younossi ZM et al reported that the global prevalence of NAFLD derived from a meta-analysis was 25.24%, which was significantly higher than the estimates in our study <sup>4</sup>. We suppose that this difference might be mainly explained by the following reasons: 1) most studies included in the meta-analysis were conducted in Europe, Asia, and North America, where the NAFLD prevalence is relatively high. Whereas in Africa and Australia, in which the NAFLD is not the major public health concern, the studies on NAFLD were rarely conducted. However, in the GBD study, the NAFLD prevalence were estimated from country to country via the mathematical models; 2) in GBD study, the total population aged from 0 years to  $\geq 85$  years were included. Children, adolescents, and young adults were relatively less afflicted by NAFLD than middle-aged people and the elders <sup>31</sup>; and 3) to ensure the robustness of estimates, NAFLD prevalence that were significantly higher than regional, super-regional, or global rates were excluded in the GBD study. Second, NAFLD is a complex and heterogeneous disease. The scarcity in histology and stage data in GBD database dwarfed us to deeply describe the NAFLD disease burden. Moreover, this type of descriptive study is short

of information at individual level. For example, the hepatic fibrosis evaluation, which is a key determinant of NAFLD outcome, was lack in the GBD study. Future studies assessing the NAFLD disease burden should also take these histological and pathological data into account. Third, the NAFLD prevalence was estimated from a mathematical model and all included patients were defined by ultrasound or other imaging diagnostic. This process might underestimate the NAFLD disease burden, because NAFLDs diagnosed by other diagnostics (e.g. noninvasive scores) were not included.

309

In summary, the prevalence of NAFLD is increasing worldwide, as well as being increasingly recognized in all parts of the world. The highest prevalence was observed in North Africa and Middle East, whereas the greatest increase was detected in Western Europe and North America. The dramatic and extensive increase in NAFLD prevalence alarmed us that NAFLD has emerged as a new public health concern worldwide and more efficient prevention strategies are urgently needed.

316

**Data sharing:** No additional data are available.

**Data availability statement:** All data are available at the online Global Health Data Exchange (GHDx) query tool (<http://ghdx.healthdata.org/gbd-results-tool>).

## References

1. Younossi Z, Tacke F, Arrese M, et al. Global Perspectives on Nonalcoholic Fatty Liver Disease and Nonalcoholic Steatohepatitis. *Hepatology* 2019;69:2672-2682.
2. Younossi Z, Anstee QM, Marietti M, et al. Global burden of NAFLD and NASH: trends, predictions, risk factors and prevention. *Nat Rev Gastroenterol Hepatol* 2018;15:11-20.
3. Estes C, Razavi H, Loomba R, et al. Modeling the epidemic of nonalcoholic fatty liver disease demonstrates an exponential increase in burden of disease. *Hepatology* 2018;67:123-133.
4. Younossi ZM, Koenig AB, Abdelatif D, et al. Global epidemiology of nonalcoholic fatty liver disease-Meta-analytic assessment of prevalence, incidence, and outcomes. *Hepatology* 2016;64:73-84.
5. Worldwide trends in diabetes since 1980: a pooled analysis of 751 population-based studies with 4.4 million participants. *Lancet* 2016;387:1513-1530.
6. Ng M, Fleming T, Robinson M, et al. Global, regional, and national prevalence of overweight and obesity in children and adults during 1980-2013: a systematic analysis for the Global Burden of Disease Study 2013. *Lancet* 2014;384:766-81.

- 335 7. Xanthakos SA, Jenkins TM, Kleiner DE, et al. High Prevalence of Nonalcoholic Fatty Liver  
336 Disease in Adolescents Undergoing Bariatric Surgery. *Gastroenterology* 2015;149:623-34.e8.
- 337 8. Lazarus JV, Ekstedt M, Marchesini G, et al. A cross-sectional study of the public health response  
338 to non-alcoholic fatty liver disease in Europe. *J Hepatol* 2019.
- 339 9. Global Burden of Disease Collaborative Network. Global Burden of Disease Study 2017 (GBD  
340 2017) Results. Seattle, United States: Institute for Health Metrics and Evaluation (IHME), 2018.  
341 Available from <http://ghdx.healthdata.org/gbd-results-tool>.
- 342 10. GBD Disease, Injury, Incidence, Prevalence, Collaborators. Global, regional, and national  
343 incidence, prevalence, and years lived with disability for 354 diseases and injuries for 195  
344 countries and territories, 1990-2017: a systematic analysis for the Global Burden of Disease  
345 Study 2017. *Lancet (London, England)* 2018;392:1789-1858.
- 346 11. Liu Z, Jiang Y, Yuan H, et al. The trends in incidence of primary liver cancer caused by specific  
347 etiologies: Results from the Global Burden of Disease Study 2016 and implications for liver  
348 cancer prevention. *J Hepatol* 2019;70:674-683.
- 349 12. Polyzos SA, Kountouras J, Mantzoros CS. Obesity and nonalcoholic fatty liver disease: From  
350 pathophysiology to therapeutics. *Metabolism* 2019;92:82-97.
- 351 13. Lu FB, Hu ED, Xu LM, et al. The relationship between obesity and the severity of non-alcoholic  
352 fatty liver disease: systematic review and meta-analysis. *Expert Rev Gastroenterol Hepatol*  
353 2018;12:491-502.
- 354 14. Ayonrinde OT, Oddy WH, Adams LA, et al. Infant nutrition and maternal obesity influence the  
355 risk of non-alcoholic fatty liver disease in adolescents. *J Hepatol* 2017;67:568-576.
- 356 15. Cusi K, Sanyal AJ, Zhang S, et al. Non-alcoholic fatty liver disease (NAFLD) prevalence and its  
357 metabolic associations in patients with type 1 diabetes and type 2 diabetes. *Diabetes Obes*  
358 *Metab* 2017;19:1630-1634.
- 359 16. Zelber-Sagi S, Ivancovsky-Wajcman D, Fliss Isakov N, et al. High red and processed meat  
360 consumption is associated with non-alcoholic fatty liver disease and insulin resistance. *J*  
361 *Hepatol* 2018;68:1239-1246.
- 362 17. Mitchell T, McKinnon E, Ayonrinde O, et al. Decreased Physical Working Capacity in  
363 Adolescents With Nonalcoholic Fatty Liver Disease Associates With Reduced Iron Availability.  
364 *Clin Gastroenterol Hepatol* 2019.
- 365 18. Stefan N, Haring HU, Cusi K. Non-alcoholic fatty liver disease: causes, diagnosis,  
366 cardiometabolic consequences, and treatment strategies. *Lancet Diabetes Endocrinol*  
367 2019;7:313-324.
- 368 19. Stefan N, Kantartzis K, Haring HU. Causes and metabolic consequences of Fatty liver. *Endocr*  
369 *Rev* 2008;29:939-60.
- 370 20. Marra F, Svegliati-Baroni G. Lipotoxicity and the gut-liver axis in NASH pathogenesis. *J Hepatol*  
371 2018;68:280-295.
- 372 21. Eslam M, Valenti L, Romeo S. Genetics and epigenetics of NAFLD and NASH: Clinical impact. *J*  
373 *Hepatol* 2018;68:268-279.
- 374 22. Lomonaco R, Ortiz-Lopez C, Orsak B, et al. Effect of adipose tissue insulin resistance on  
375 metabolic parameters and liver histology in obese patients with nonalcoholic fatty liver disease.  
376 *Hepatology (Baltimore, Md.)* 2012;55:1389-1397.
- 377 23. Donnelly KL, Smith CI, Schwarzenberg SJ, et al. Sources of fatty acids stored in liver and  
378 secreted via lipoproteins in patients with nonalcoholic fatty liver disease. *The Journal of clinical*

- 379 investigation 2005;115:1343-1351.
- 380 24. Sanyal AJ. Past, present and future perspectives in nonalcoholic fatty liver disease. *Nat Rev*
- 381 *Gastroenterol Hepatol* 2019;16:377-386.
- 382 25. Friedman SL, Neuschwander-Tetri BA, Rinella M, et al. Mechanisms of NAFLD development
- 383 and therapeutic strategies. *Nature medicine* 2018;24:908-922.
- 384 26. Younossi ZM, Otgonsuren M, Henry L, et al. Association of nonalcoholic fatty liver disease
- 385 (NAFLD) with hepatocellular carcinoma (HCC) in the United States from 2004 to 2009.
- 386 *Hepatology* 2015;62:1723-30.
- 387 27. Younossi ZM, Blissett D, Blissett R, et al. The economic and clinical burden of nonalcoholic fatty
- 388 liver disease in the United States and Europe. *Hepatology* 2016;64:1577-1586.
- 389 28. Kim D, Vazquez-Montesino LM, Li AA, et al. Inadequate Physical Activity and Sedentary
- 390 Behavior Are Independent Predictors of Nonalcoholic Fatty Liver Disease. *Hepatology* 2020.
- 391 29. Zhang G, Cao F, Shi L, et al. Contribution of high body mass index and alcohol use to liver
- 392 cancer-related mortality: A study based on 195 countries or territories. *Dig Liver Dis* 2019.
- 393 30. Zhou F, Zhou J, Wang W, et al. Unexpected Rapid Increase in the Burden of NAFLD in China
- 394 From 2008 to 2018: A Systematic Review and Meta-Analysis. *Hepatology* 2019;70:1119-1133.
- 395 31. Anderson EL, Howe LD, Jones HE, et al. The Prevalence of Non-Alcoholic Fatty Liver Disease in
- 396 Children and Adolescents: A Systematic Review and Meta-Analysis. *PLoS One*
- 397 2015;10:e0140908.
- 398
- 399

400 **Table. The changing trends of number of prevalent cases and prevalence rate of NAFLD from**

401 **1990 to 2017.**

|                                  | 1990                          |                    | 2017                          |                   | 1990-2017*        |
|----------------------------------|-------------------------------|--------------------|-------------------------------|-------------------|-------------------|
|                                  | No. of cases<br>(× 1 million) | Prevalence<br>(%)‡ | No. of cases<br>(× 1 million) | Prevalence<br>(%) |                   |
| <b>Overall</b>                   | 391.2                         | 8.2                | 882.1                         | 10.9              | 1.05 (1.04, 1.07) |
| <b>Sex</b>                       |                               |                    |                               |                   |                   |
| Male                             | 236.4                         | 10.0               | 524.0                         | 13.2              | 1.00 (0.99, 1.02) |
| Female                           | 154.8                         | 6.4                | 358.1                         | 8.7               | 1.12 (1.10, 1.13) |
| <b>Socio-demographical index</b> |                               |                    |                               |                   |                   |
| High                             | 76.2                          | 6.7                | 137.4                         | 9.0               | 1.14 (1.06, 1.21) |
| High-middle                      | 100.2                         | 9.4                | 224.5                         | 13.1              | 1.21 (1.17, 1.25) |
| Middle                           | 120.0                         | 9.4                | 282.3                         | 12.2              | 0.94 (0.92, 0.96) |
| Middle-low                       | 62.3                          | 8.0                | 157.1                         | 10.5              | 1.01 (1.00, 1.02) |
| Low                              | 30.4                          | 6.5                | 76.2                          | 7.9               | 0.74 (0.70, 0.79) |
| <b>Age (years)†</b>              |                               |                    |                               |                   |                   |
| 15-49                            | 241.5                         | 8.8                | 489.1                         | 12.5              | 1.25 (1.22, 1.28) |
| 50-69                            | 109.1                         | 15.9               | 281.5                         | 21.4              | 1.06 (1.04, 1.08) |
| ≥70                              | 40.7                          | 20.0               | 111.4                         | 25.7              | 0.93 (0.89, 0.96) |
| <b>GBD Region</b>                |                               |                    |                               |                   |                   |
| Andean Latin America             | 2.5                           | 8.8                | 7.1                           | 12.0              | 1.13 (1.10, 1.16) |
| Australasia                      | 1.5                           | 6.4                | 3.1                           | 8.6               | 1.16 (1.04, 1.28) |

|                              |       |      |       |      |                   |
|------------------------------|-------|------|-------|------|-------------------|
| Caribbean                    | 2.8   | 9.2  | 5.8   | 11.7 | 1.03 (0.98, 1.07) |
| Central Asia                 | 3.8   | 6.7  | 7.4   | 8.5  | 0.91 (0.81, 1.01) |
| Central Europe               | 9.5   | 6.7  | 13.1  | 8.0  | 0.70 (0.67, 0.73) |
| Central Latin America        | 12.7  | 10.5 | 36.5  | 14.4 | 1.17 (1.14, 1.21) |
| Central Sub-Saharan Africa   | 2.3   | 6.5  | 6.2   | 7.5  | 0.58 (0.50, 0.67) |
| East Asia                    | 111.8 | 9.6  | 242.8 | 12.6 | 0.88 (0.82, 0.95) |
| Eastern Europe               | 18.4  | 7.0  | 23.7  | 8.4  | 0.73 (0.64, 0.82) |
| Eastern Sub-Saharan Africa   | 7.1   | 6.0  | 18.0  | 7.0  | 0.58 (0.55, 0.60) |
| High-income Asia Pacific     | 11.4  | 5.7  | 18.7  | 7.0  | 0.78 (0.75, 0.82) |
| High-income North America    | 23.1  | 7.2  | 44.0  | 9.6  | 1.17 (1.06, 1.29) |
| North Africa and Middle East | 35.0  | 14.3 | 108.0 | 19.3 | 1.12 (1.10, 1.15) |
| Oceania                      | 0.6   | 12.8 | 1.6   | 16.3 | 0.90 (0.87, 0.92) |
| South Asia                   | 53.6  | 6.4  | 131.2 | 8.0  | 0.81 (0.78, 0.83) |
| Southeast Asia               | 39.5  | 10.9 | 98.5  | 14.5 | 1.12 (1.08, 1.15) |
| Southern Latin America       | 3.1   | 6.5  | 6.3   | 8.6  | 1.05 (1.01, 1.08) |
| Southern Sub-Saharan Africa  | 3.7   | 9.3  | 8.1   | 11.4 | 0.73 (0.69, 0.77) |
| Tropical Latin America       | 9.8   | 8.0  | 26.7  | 11.1 | 1.17 (1.15, 1.19) |
| Western Europe               | 30.9  | 6.5  | 52.1  | 8.9  | 1.17 (1.05, 1.29) |
| Western Sub-Saharan Africa   | 8.4   | 6.5  | 23.2  | 8.0  | 0.69 (0.63, 0.75) |

‡, the prevalence has been standardized by age.

†, crude prevalence rate for each age group.

\*, P values of all EAPCs were <0.001.

EAPC, estimated average percentage change; CI, confidence interval.

### Figure legends

Figure 1. The changing trends of case number of nonalcoholic fatty liver disease from 1990 to 2017, by sex and socio-demographical index.

Figure 2. The temporal trends of prevalence of nonalcoholic fatty liver disease from 1990 to 2017, by sex and socio-demographical index.

Figure 3. The prevalence trends of nonalcoholic fatty liver disease at the GBD regional level. The error bar denotes 95% confidence interval.

Figure 4. The age-standardized prevalence rates (A), case number (B), and its trends (C) of nonalcoholic fatty liver disease between 1990 and 2017 at the national level.

Figure 5. The association of prevalence trends of nonalcoholic fatty liver disease, quantified by estimated average percentage changes (EAPCs), with human development index (A), trends of overweight prevalence (B), and trends of diabetes prevalence (C) at the national level. The correlation coefficient was derived from Pearson correlation test.



Figure 1

222x142mm (300 x 300 DPI)



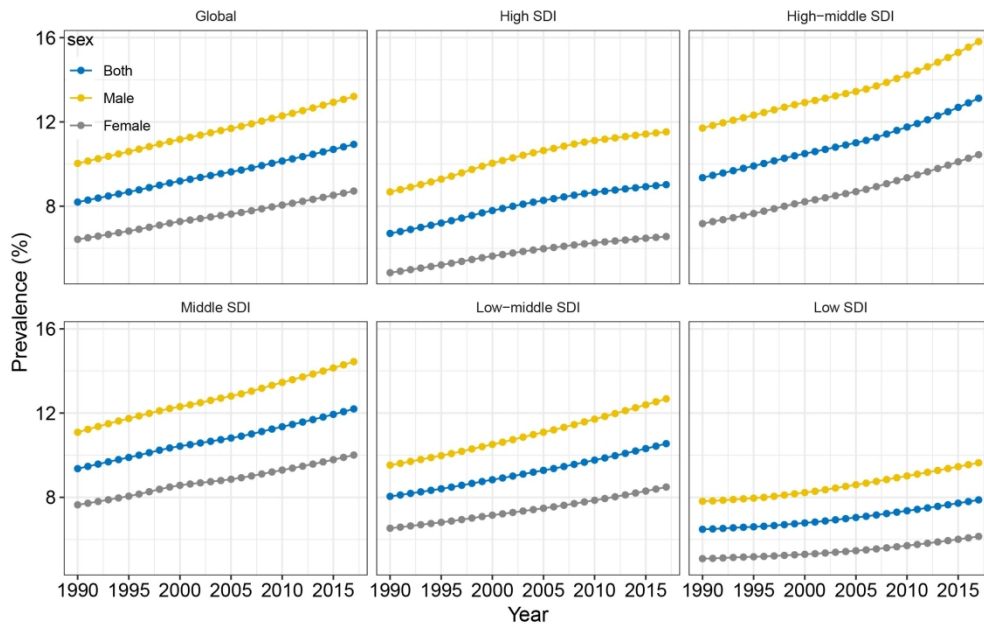

Figure 2

222x142mm (300 x 300 DPI)

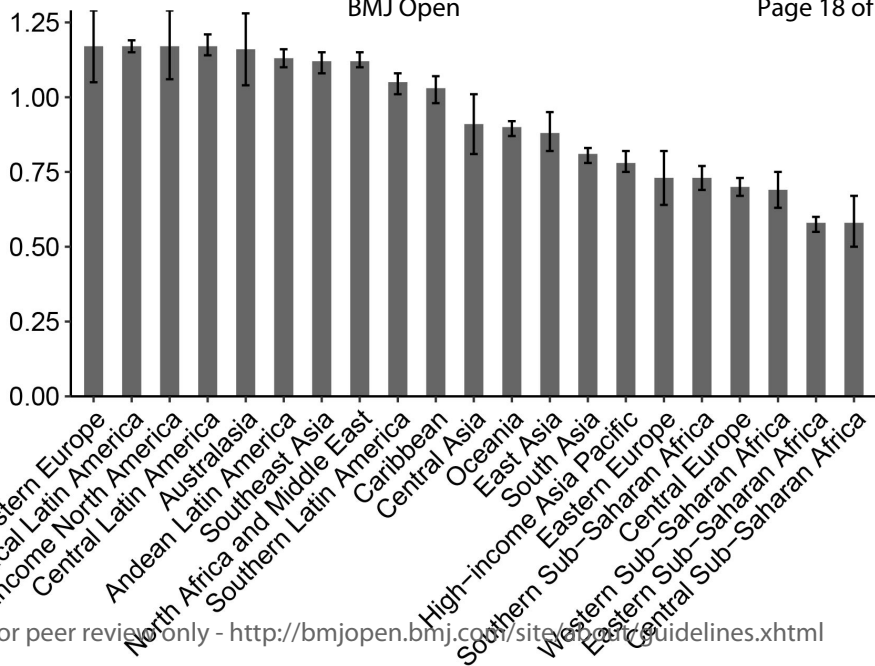

**A**

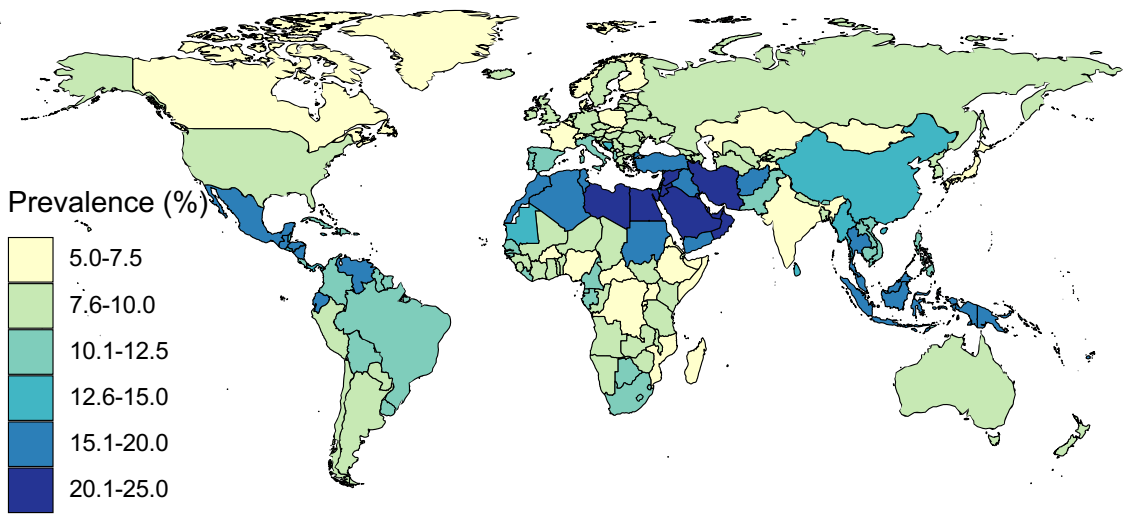

**B**

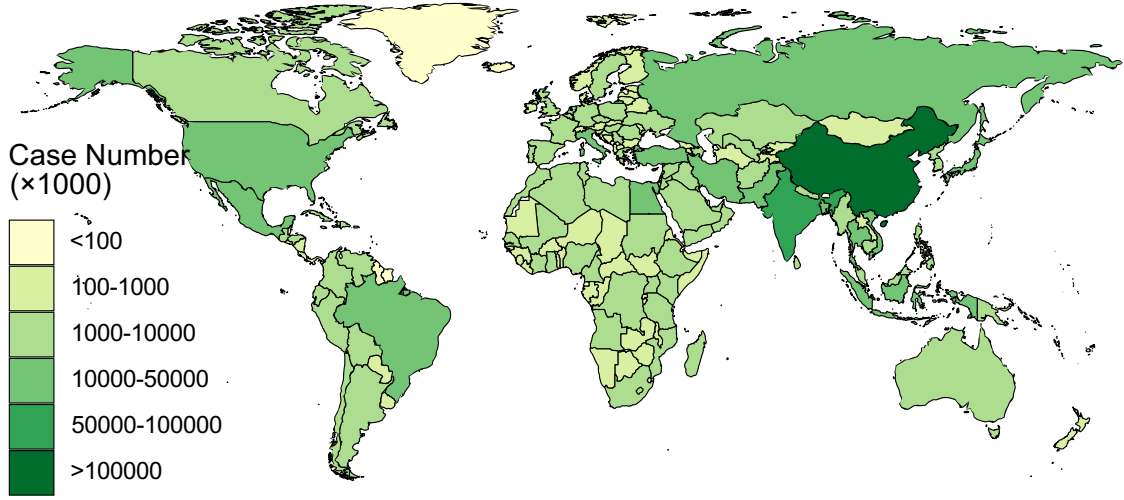

**C**

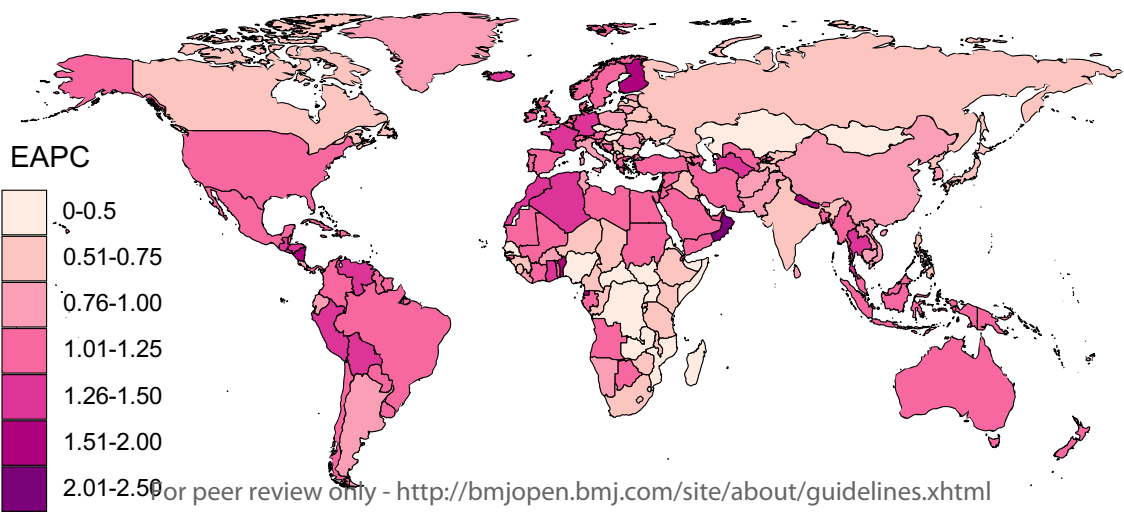

1  
2  
3  
4  
5  
6  
7  
8  
9  
10  
11  
12  
13  
14  
15  
16  
17  
18  
19  
20  
21  
22  
23  
24  
25  
26  
27  
28  
29  
30  
31  
32  
33  
34  
35  
36  
37  
38  
39  
40  
41  
42  
43  
44  
45  
46  
47  
48  
49  
50

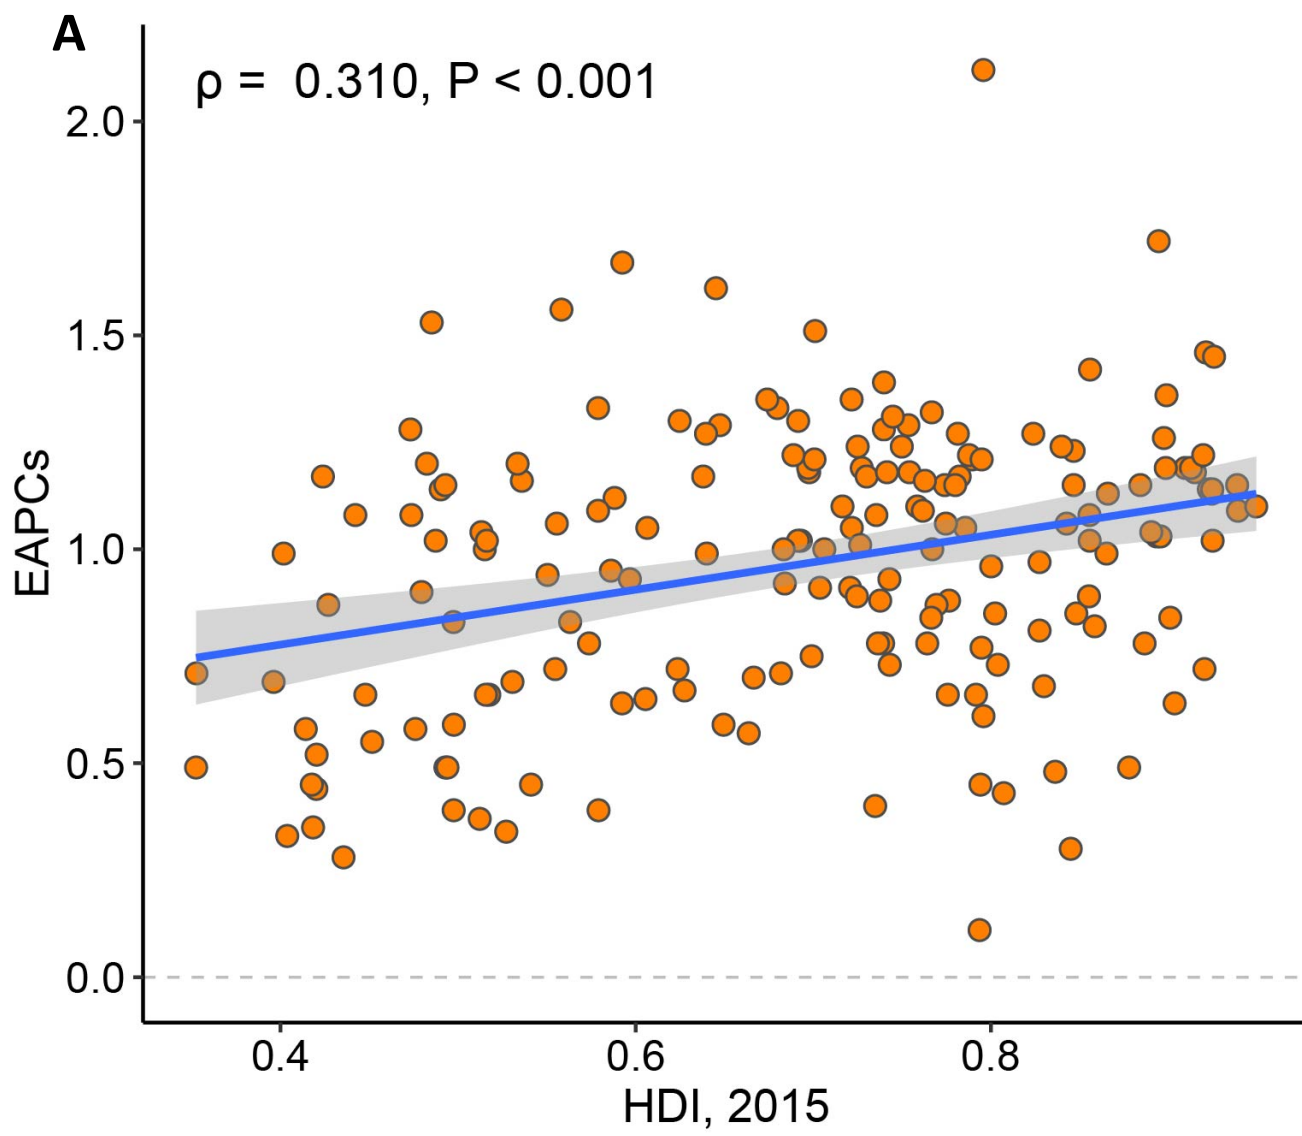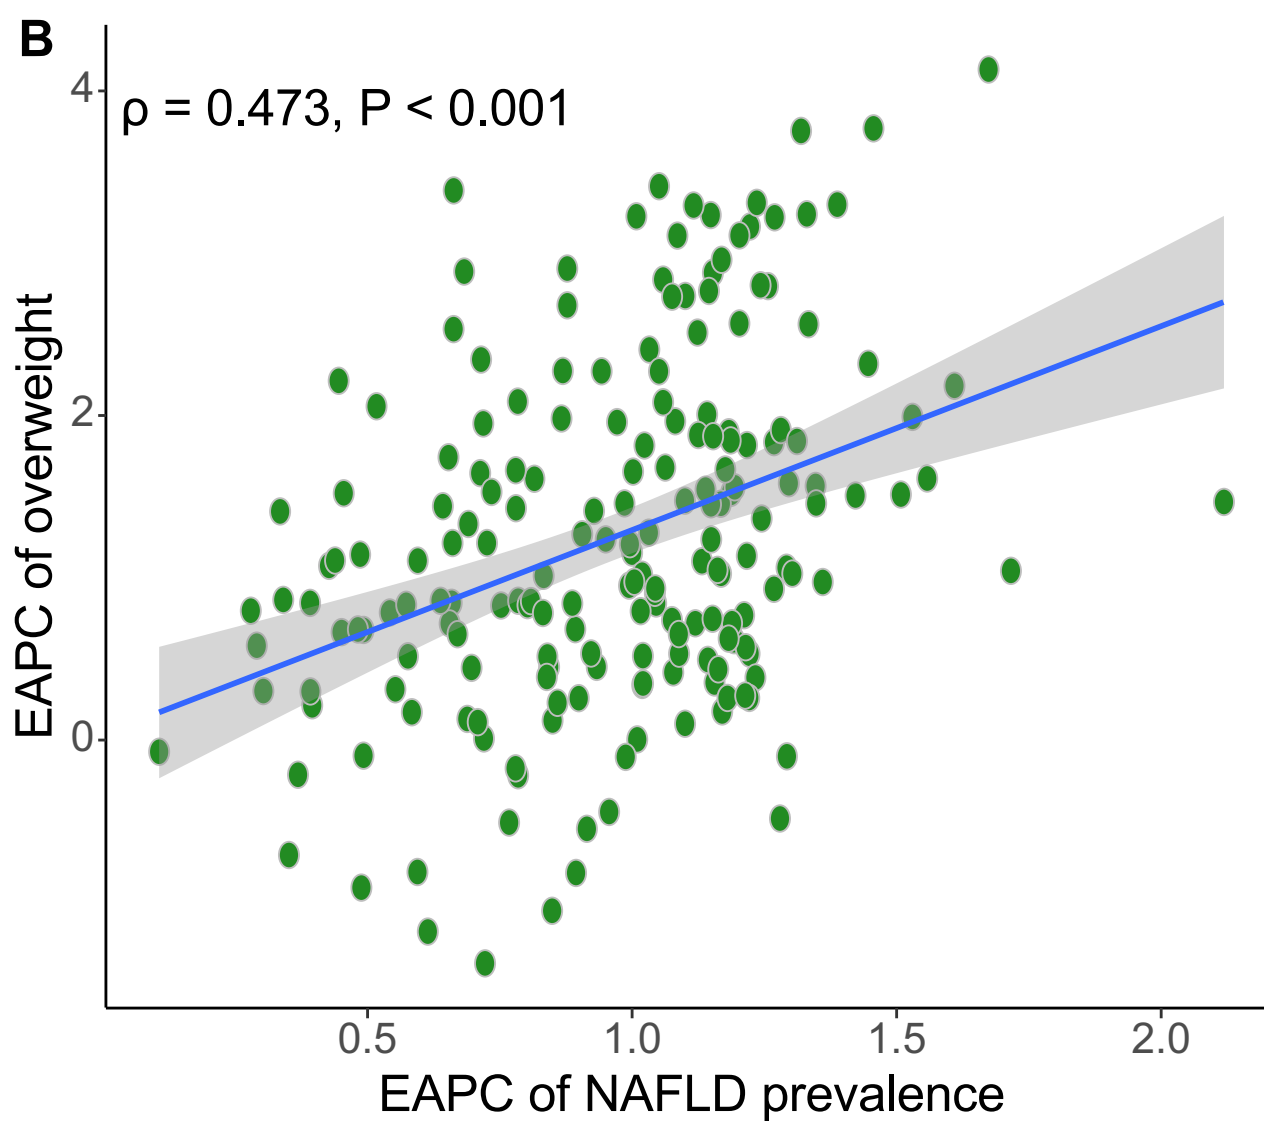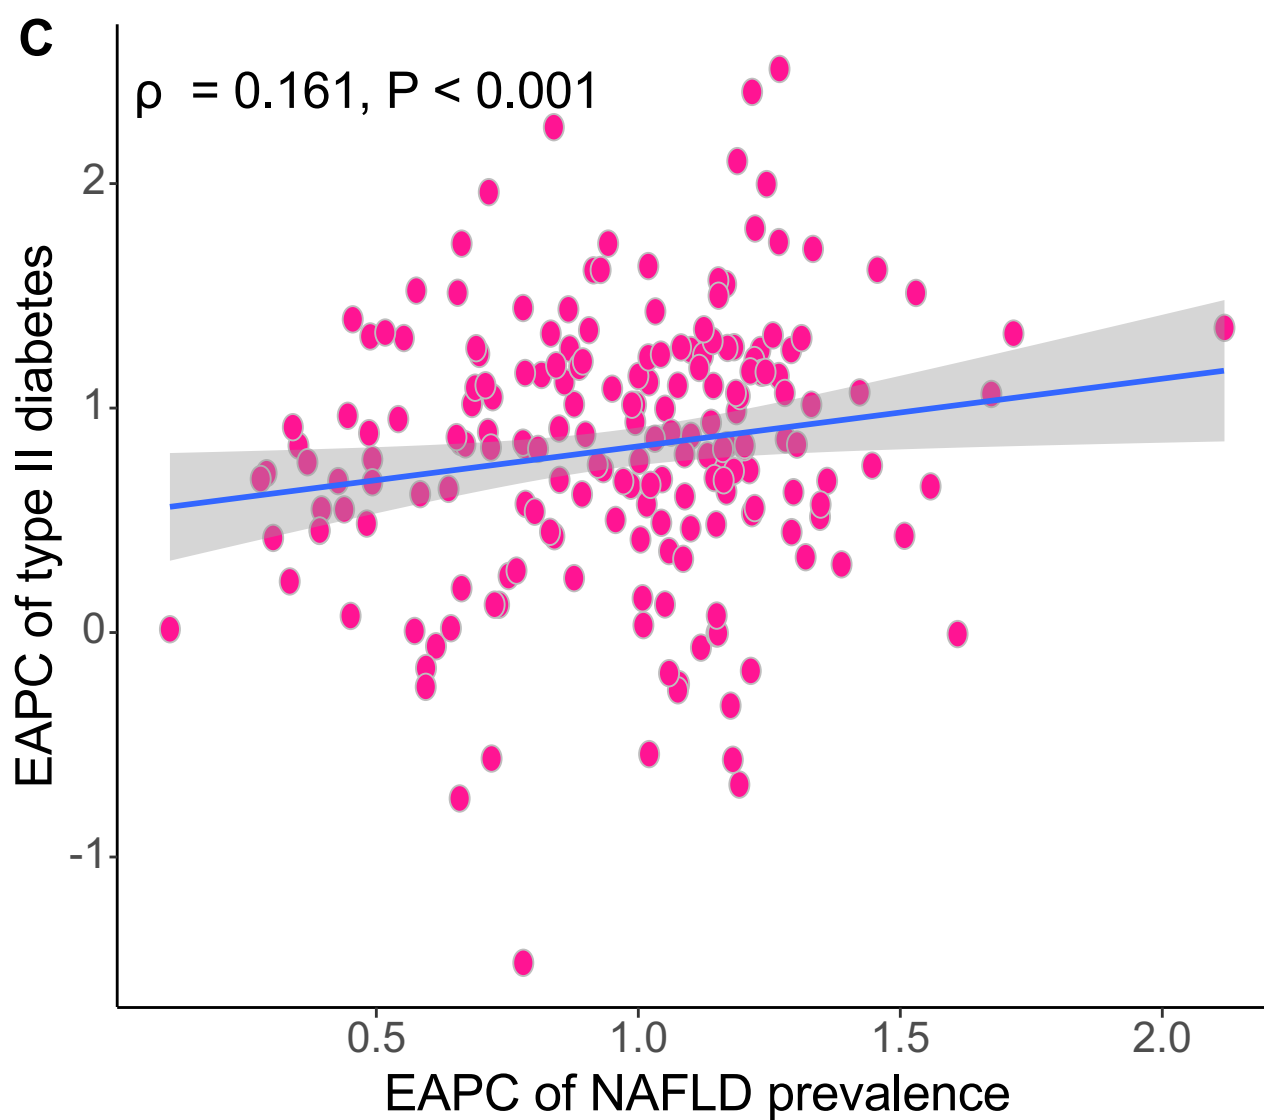

1  
2 S-TABLE. The EAPCs of NAFLD prevalence at the national level, by sex and age.  
3

| 4 location                    | 5 sex     | 6 age               | 7 eapcs | 8 los | 9 ups | 10 pvalue |
|-------------------------------|-----------|---------------------|---------|-------|-------|-----------|
| 11 North Korea                | 12 Male   | 13 All Ages         | 1.44    | 1.35  | 1.53  | 0         |
| 14 North Korea                | 15 Male   | 16 15-49 years      | 0.78    | 0.74  | 0.81  | 0         |
| 17 North Korea                | 18 Male   | 19 50-69 years      | 0.65    | 0.62  | 0.68  | 0         |
| 20 North Korea                | 21 Male   | 22 70+ years        | 0.53    | 0.49  | 0.58  | 0         |
| 23 North Korea                | 24 Male   | 25 Age-standardized | 0.58    | 0.55  | 0.61  | 0         |
| 26 North Korea                | 27 Female | 28 All Ages         | 1.62    | 1.57  | 1.67  | 0         |
| 29 North Korea                | 30 Female | 31 15-49 years      | 1.11    | 1.09  | 1.13  | 0         |
| 32 North Korea                | 33 Female | 34 50-69 years      | 0.81    | 0.81  | 0.82  | 0         |
| 35 North Korea                | 36 Female | 37 70+ years        | 0.71    | 0.68  | 0.73  | 0         |
| 38 North Korea                | 39 Female | 40 Age-standardized | 0.75    | 0.73  | 0.77  | 0         |
| 41 North Korea                | 42 Both   | 43 All Ages         | 1.55    | 1.48  | 1.62  | 0         |
| 44 North Korea                | 45 Both   | 46 15-49 years      | 0.99    | 0.97  | 1.01  | 0         |
| 47 North Korea                | 48 Both   | 49 50-69 years      | 0.77    | 0.75  | 0.79  | 0         |
| 50 North Korea                | 51 Both   | 52 70+ years        | 0.68    | 0.64  | 0.71  | 0         |
| 53 Oman                       | 54 Both   | 55 Age-standardized | 2.12    | 1.97  | 2.26  | 0         |
| 56 Taiwan (Province of China) | 57 Male   | 58 All Ages         | 2.3     | 2.25  | 2.36  | 0         |
| 59 Taiwan (Province of China) | 60 Male   | 15-49 years         | 1.48    | 1.42  | 1.54  | 0         |
| Taiwan (Province of China)    | Male      | 50-69 years         | 1.12    | 1.08  | 1.15  | 0         |
| Taiwan (Province of China)    | Male      | 70+ years           | 0.82    | 0.78  | 0.86  | 0         |
| Taiwan (Province of China)    | Male      | Age-standardized    | 1.11    | 1.07  | 1.16  | 0         |
| Taiwan (Province of China)    | Female    | All Ages            | 2.96    | 2.85  | 3.06  | 0         |
| Taiwan (Province of China)    | Female    | 15-49 years         | 1.93    | 1.83  | 2.03  | 0         |
| Taiwan (Province of China)    | Female    | 50-69 years         | 1.48    | 1.42  | 1.55  | 0         |
| Taiwan (Province of China)    | Female    | 70+ years           | 1.24    | 1.15  | 1.32  | 0         |
| Taiwan (Province of China)    | Female    | Age-standardized    | 1.45    | 1.36  | 1.54  | 0         |
| Taiwan (Province of China)    | Both      | All Ages            | 2.54    | 2.47  | 2.62  | 0         |
| Taiwan (Province of China)    | Both      | 15-49 years         | 1.64    | 1.57  | 1.72  | 0         |
| Taiwan (Province of China)    | Both      | 50-69 years         | 1.21    | 1.15  | 1.27  | 0         |
| Taiwan (Province of China)    | Both      | 70+ years           | 0.91    | 0.85  | 0.97  | 0         |
| Finland                       | Both      | Age-standardized    | 1.72    | 1.56  | 1.87  | 0         |
| Armenia                       | Male      | All Ages            | 1.92    | 1.88  | 1.96  | 0         |
| Armenia                       | Male      | 15-49 years         | 1.05    | 0.95  | 1.16  | 0         |
| Armenia                       | Male      | 50-69 years         | 0.41    | 0.29  | 0.54  | 0         |
| Armenia                       | Male      | 70+ years           | 0.87    | 0.8   | 0.94  | 0         |
| Armenia                       | Male      | Age-standardized    | 0.8     | 0.72  | 0.88  | 0         |
| Armenia                       | Female    | All Ages            | 2.17    | 2.11  | 2.24  | 0         |
| Armenia                       | Female    | 15-49 years         | 1.1     | 1.03  | 1.17  | 0         |
| Armenia                       | Female    | 50-69 years         | 0.78    | 0.66  | 0.9   | 0         |
| Armenia                       | Female    | 70+ years           | 1.24    | 1.19  | 1.29  | 0         |
| Armenia                       | Female    | Age-standardized    | 1.04    | 0.96  | 1.12  | 0         |
| Armenia                       | Both      | All Ages            | 2.06    | 2     | 2.11  | 0         |
| Armenia                       | Both      | 15-49 years         | 1.08    | 0.99  | 1.17  | 0         |
| Armenia                       | Both      | 50-69 years         | 0.61    | 0.49  | 0.73  | 0         |
| Armenia                       | Both      | 70+ years           | 1.11    | 1.06  | 1.16  | 0         |
| Armenia                       | Both      | Age-standardized    | 1.67    | 1.55  | 1.8   | 0         |
| Equatorial Guinea             | Both      | Age-standardized    | 1.67    | 1.55  | 1.8   | 0         |
| Andorra                       | Male      | All Ages            | 1.24    | 1.08  | 1.4   | 0         |
| Andorra                       | Male      | 15-49 years         | 1.12    | 0.96  | 1.29  | 0         |
| Andorra                       | Male      | 50-69 years         | 0.82    | 0.72  | 0.91  | 0         |
| Andorra                       | Male      | 70+ years           | 0.49    | 0.41  | 0.57  | 0         |
| Andorra                       | Male      | Age-standardized    | 0.84    | 0.74  | 0.94  | 0         |
| Andorra                       | Female    | All Ages            | 1.55    | 1.38  | 1.73  | 0         |
| Andorra                       | Female    | 15-49 years         | 1.3     | 1.14  | 1.46  | 0         |
| Andorra                       | Female    | 50-69 years         | 0.95    | 0.83  | 1.06  | 0         |
| Andorra                       | Female    | 70+ years           | 0.78    | 0.66  | 0.91  | 0         |

|    |                    |        |                  |      |      |      |   |
|----|--------------------|--------|------------------|------|------|------|---|
| 1  |                    |        |                  |      |      |      |   |
| 2  | Andorra            | Female | Age-standardized | 0.97 | 0.86 | 1.09 | 0 |
| 3  | Andorra            | Both   | All Ages         | 1.27 | 1.11 | 1.44 | 0 |
| 4  | Andorra            | Both   | 15-49 years      | 1.08 | 0.93 | 1.23 | 0 |
| 5  | Andorra            | Both   | 50-69 years      | 0.85 | 0.73 | 0.98 | 0 |
| 6  | Andorra            | Both   | 70+ years        | 0.52 | 0.42 | 0.61 | 0 |
| 7  | Nicaragua          | Both   | Age-standardized | 1.61 | 1.53 | 1.69 | 0 |
| 8  | Bhutan             | Male   | All Ages         | 2.19 | 2.14 | 2.24 | 0 |
| 9  | Bhutan             | Male   | 15-49 years      | 1.37 | 1.32 | 1.42 | 0 |
| 10 | Bhutan             | Male   | 50-69 years      | 0.92 | 0.9  | 0.95 | 0 |
| 11 | Bhutan             | Male   | 70+ years        | 0.92 | 0.9  | 0.94 | 0 |
| 12 | Bhutan             | Male   | Age-standardized | 0.98 | 0.94 | 1.01 | 0 |
| 13 | Bhutan             | Female | All Ages         | 2.1  | 2.06 | 2.15 | 0 |
| 14 | Bhutan             | Female | 15-49 years      | 1.3  | 1.24 | 1.36 | 0 |
| 15 | Bhutan             | Female | 50-69 years      | 1.05 | 1.01 | 1.08 | 0 |
| 16 | Bhutan             | Female | 70+ years        | 1.14 | 1.12 | 1.16 | 0 |
| 17 | Bhutan             | Female | Age-standardized | 1.09 | 1.06 | 1.11 | 0 |
| 18 | Bhutan             | Both   | All Ages         | 2.17 | 2.13 | 2.21 | 0 |
| 19 | Bhutan             | Both   | 15-49 years      | 1.38 | 1.33 | 1.42 | 0 |
| 20 | Bhutan             | Both   | 50-69 years      | 0.98 | 0.95 | 1    | 0 |
| 21 | Bhutan             | Both   | 70+ years        | 1    | 0.96 | 1.04 | 0 |
| 22 | Nepal              | Both   | Age-standardized | 1.56 | 1.4  | 1.72 | 0 |
| 23 | Dominican Republic | Male   | All Ages         | 2.1  | 2.02 | 2.18 | 0 |
| 24 | Dominican Republic | Male   | 15-49 years      | 1.34 | 1.27 | 1.42 | 0 |
| 25 | Dominican Republic | Male   | 50-69 years      | 0.92 | 0.84 | 1    | 0 |
| 26 | Dominican Republic | Male   | 70+ years        | 0.72 | 0.64 | 0.81 | 0 |
| 27 | Dominican Republic | Male   | Age-standardized | 0.97 | 0.89 | 1.05 | 0 |
| 28 | Dominican Republic | Female | All Ages         | 2.26 | 2.24 | 2.29 | 0 |
| 29 | Dominican Republic | Female | 15-49 years      | 1.46 | 1.4  | 1.51 | 0 |
| 30 | Dominican Republic | Female | 50-69 years      | 1.08 | 1.05 | 1.1  | 0 |
| 31 | Dominican Republic | Female | 70+ years        | 0.97 | 0.94 | 1    | 0 |
| 32 | Dominican Republic | Female | Age-standardized | 1.1  | 1.08 | 1.12 | 0 |
| 33 | Dominican Republic | Both   | All Ages         | 2.19 | 2.14 | 2.24 | 0 |
| 34 | Dominican Republic | Both   | 15-49 years      | 1.45 | 1.4  | 1.49 | 0 |
| 35 | Dominican Republic | Both   | 50-69 years      | 0.99 | 0.95 | 1.03 | 0 |
| 36 | Dominican Republic | Both   | 70+ years        | 0.81 | 0.76 | 0.86 | 0 |
| 37 | Benin              | Both   | Age-standardized | 1.53 | 1.45 | 1.61 | 0 |
| 38 | Samoa              | Male   | All Ages         | 1.32 | 1.26 | 1.38 | 0 |
| 39 | Samoa              | Male   | 15-49 years      | 1.18 | 1.07 | 1.28 | 0 |
| 40 | Samoa              | Male   | 50-69 years      | 0.67 | 0.63 | 0.71 | 0 |
| 41 | Samoa              | Male   | 70+ years        | 0.59 | 0.55 | 0.63 | 0 |
| 42 | Samoa              | Male   | Age-standardized | 0.78 | 0.74 | 0.82 | 0 |
| 43 | Samoa              | Female | All Ages         | 1.6  | 1.5  | 1.7  | 0 |
| 44 | Samoa              | Female | 15-49 years      | 1.37 | 1.23 | 1.51 | 0 |
| 45 | Samoa              | Female | 50-69 years      | 1.06 | 1    | 1.11 | 0 |
| 46 | Samoa              | Female | 70+ years        | 0.88 | 0.78 | 0.98 | 0 |
| 47 | Samoa              | Female | Age-standardized | 1.07 | 1.01 | 1.14 | 0 |
| 48 | Samoa              | Both   | All Ages         | 1.44 | 1.37 | 1.52 | 0 |
| 49 | Samoa              | Both   | 15-49 years      | 1.26 | 1.14 | 1.38 | 0 |
| 50 | Samoa              | Both   | 50-69 years      | 0.86 | 0.81 | 0.9  | 0 |
| 51 | Samoa              | Both   | 70+ years        | 0.74 | 0.67 | 0.81 | 0 |
| 52 | Maldives           | Both   | Age-standardized | 1.51 | 1.45 | 1.56 | 0 |
| 53 | Malaysia           | Male   | All Ages         | 2.21 | 2.16 | 2.27 | 0 |
| 54 | Malaysia           | Male   | 15-49 years      | 1.32 | 1.28 | 1.35 | 0 |
| 55 | Malaysia           | Male   | 50-69 years      | 1.13 | 1.09 | 1.18 | 0 |
| 56 | Malaysia           | Male   | 70+ years        | 0.94 | 0.9  | 0.97 | 0 |
| 57 | Malaysia           | Male   | Age-standardized | 1.16 | 1.12 | 1.2  | 0 |



|    |          |        |                  |      |      |      |   |
|----|----------|--------|------------------|------|------|------|---|
| 1  |          |        |                  |      |      |      |   |
| 2  | Malaysia | Female | All Ages         | 2.24 | 2.2  | 2.27 | 0 |
| 3  | Malaysia | Female | 15-49 years      | 1.34 | 1.29 | 1.39 | 0 |
| 4  | Malaysia | Female | 50-69 years      | 1.26 | 1.23 | 1.29 | 0 |
| 5  | Malaysia | Female | 70+ years        | 1.18 | 1.14 | 1.23 | 0 |
| 6  | Malaysia | Female | Age-standardized | 1.23 | 1.19 | 1.26 | 0 |
| 7  | Malaysia | Both   | All Ages         | 2.24 | 2.2  | 2.28 | 0 |
| 8  | Malaysia | Both   | 15-49 years      | 1.36 | 1.32 | 1.39 | 0 |
| 9  | Malaysia | Both   | 50-69 years      | 1.2  | 1.16 | 1.23 | 0 |
| 10 | Malaysia | Both   | 70+ years        | 1.08 | 1.04 | 1.12 | 0 |
| 11 | Iceland  | Both   | Age-standardized | 1.46 | 1.35 | 1.56 | 0 |
| 12 | Malta    | Male   | All Ages         | 2.12 | 1.95 | 2.29 | 0 |
| 13 | Malta    | Male   | 15-49 years      | 1.38 | 1.24 | 1.52 | 0 |
| 14 | Malta    | Male   | 50-69 years      | 1.26 | 1.12 | 1.4  | 0 |
| 15 | Malta    | Male   | 70+ years        | 1    | 0.85 | 1.15 | 0 |
| 16 | Malta    | Male   | Age-standardized | 1.29 | 1.13 | 1.46 | 0 |
| 17 | Malta    | Female | All Ages         | 2.46 | 2.28 | 2.64 | 0 |
| 18 | Malta    | Female | 15-49 years      | 1.5  | 1.37 | 1.64 | 0 |
| 19 | Malta    | Female | 50-69 years      | 1.59 | 1.43 | 1.74 | 0 |
| 20 | Malta    | Female | 70+ years        | 1.47 | 1.27 | 1.66 | 0 |
| 21 | Malta    | Female | Age-standardized | 1.52 | 1.34 | 1.69 | 0 |
| 22 | Malta    | Both   | All Ages         | 2.25 | 2.08 | 2.43 | 0 |
| 23 | Malta    | Both   | 15-49 years      | 1.45 | 1.31 | 1.59 | 0 |
| 24 | Malta    | Both   | 50-69 years      | 1.48 | 1.32 | 1.63 | 0 |
| 25 | Malta    | Both   | 70+ years        | 1.23 | 1.08 | 1.39 | 0 |
| 26 | Germany  | Both   | Age-standardized | 1.45 | 1.32 | 1.57 | 0 |
| 27 | Colombia | Male   | All Ages         | 2.17 | 2.14 | 2.21 | 0 |
| 28 | Colombia | Male   | 15-49 years      | 1.37 | 1.31 | 1.44 | 0 |
| 29 | Colombia | Male   | 50-69 years      | 1.05 | 1    | 1.1  | 0 |
| 30 | Colombia | Male   | 70+ years        | 0.85 | 0.79 | 0.9  | 0 |
| 31 | Colombia | Male   | Age-standardized | 1.12 | 1.07 | 1.17 | 0 |
| 32 | Colombia | Female | All Ages         | 2.53 | 2.48 | 2.57 | 0 |
| 33 | Colombia | Female | 15-49 years      | 1.6  | 1.5  | 1.69 | 0 |
| 34 | Colombia | Female | 50-69 years      | 1.24 | 1.19 | 1.29 | 0 |
| 35 | Colombia | Female | 70+ years        | 1.12 | 1.07 | 1.17 | 0 |
| 36 | Colombia | Female | Age-standardized | 1.29 | 1.23 | 1.34 | 0 |
| 37 | Colombia | Both   | All Ages         | 2.34 | 2.3  | 2.37 | 0 |
| 38 | Colombia | Both   | 15-49 years      | 1.48 | 1.41 | 1.56 | 0 |
| 39 | Colombia | Both   | 50-69 years      | 1.12 | 1.07 | 1.17 | 0 |
| 40 | Colombia | Both   | 70+ years        | 0.97 | 0.92 | 1.02 | 0 |
| 41 | Malta    | Both   | Age-standardized | 1.42 | 1.25 | 1.59 | 0 |
| 42 | Iceland  | Male   | All Ages         | 1.9  | 1.78 | 2.01 | 0 |
| 43 | Iceland  | Male   | 15-49 years      | 1.53 | 1.42 | 1.64 | 0 |
| 44 | Iceland  | Male   | 50-69 years      | 1.3  | 1.22 | 1.38 | 0 |
| 45 | Iceland  | Male   | 70+ years        | 1.06 | 0.97 | 1.15 | 0 |
| 46 | Iceland  | Male   | Age-standardized | 1.38 | 1.29 | 1.47 | 0 |
| 47 | Iceland  | Female | All Ages         | 2.08 | 1.96 | 2.2  | 0 |
| 48 | Iceland  | Female | 15-49 years      | 1.68 | 1.56 | 1.8  | 0 |
| 49 | Iceland  | Female | 50-69 years      | 1.46 | 1.36 | 1.55 | 0 |
| 50 | Iceland  | Female | 70+ years        | 1.4  | 1.24 | 1.57 | 0 |
| 51 | Iceland  | Female | Age-standardized | 1.55 | 1.43 | 1.67 | 0 |
| 52 | Iceland  | Both   | All Ages         | 1.96 | 1.84 | 2.08 | 0 |
| 53 | Iceland  | Both   | 15-49 years      | 1.58 | 1.46 | 1.7  | 0 |
| 54 | Iceland  | Both   | 50-69 years      | 1.39 | 1.29 | 1.48 | 0 |
| 55 | Iceland  | Both   | 70+ years        | 1.25 | 1.13 | 1.37 | 0 |
| 56 | Iceland  | Both   | Age-standardized | 1.39 | 1.35 | 1.43 | 0 |
| 57 | Thailand | Both   | Age-standardized | 1.39 | 1.35 | 1.43 | 0 |
| 58 | Spain    | Male   | All Ages         | 1.73 | 1.51 | 1.94 | 0 |
| 59 |          |        |                  |      |      |      |   |
| 60 |          |        |                  |      |      |      |   |

|    |                                  |        |                  |      |      |      |   |
|----|----------------------------------|--------|------------------|------|------|------|---|
| 1  |                                  |        |                  |      |      |      |   |
| 2  | Spain                            | Male   | 15-49 years      | 1.69 | 1.53 | 1.86 | 0 |
| 3  | Spain                            | Male   | 50-69 years      | 1.11 | 0.97 | 1.24 | 0 |
| 4  | Spain                            | Male   | 70+ years        | 0.88 | 0.75 | 1.01 | 0 |
| 5  | Spain                            | Male   | Age-standardized | 1.16 | 1.02 | 1.29 | 0 |
| 6  | Spain                            | Female | All Ages         | 1.67 | 1.47 | 1.87 | 0 |
| 7  | Spain                            | Female | 15-49 years      | 1.6  | 1.45 | 1.75 | 0 |
| 8  | Spain                            | Female | 50-69 years      | 1    | 0.88 | 1.12 | 0 |
| 9  | Spain                            | Female | 70+ years        | 0.99 | 0.84 | 1.15 | 0 |
| 10 | Spain                            | Female | Age-standardized | 1.1  | 0.97 | 1.23 | 0 |
| 11 | Spain                            | Both   | All Ages         | 1.7  | 1.5  | 1.91 | 0 |
| 12 | Spain                            | Both   | 15-49 years      | 1.67 | 1.51 | 1.83 | 0 |
| 13 | Spain                            | Both   | 50-69 years      | 1.07 | 0.94 | 1.2  | 0 |
| 14 | Spain                            | Both   | 70+ years        | 0.95 | 0.81 | 1.1  | 0 |
| 15 | Spain                            | Both   | Age-standardized | 1.36 | 1.24 | 1.48 | 0 |
| 16 | Israel                           | Both   | All Ages         | 2.08 | 2.03 | 2.12 | 0 |
| 17 | China                            | Male   | 15-49 years      | 1.24 | 1.11 | 1.36 | 0 |
| 18 | China                            | Male   | 50-69 years      | 0.82 | 0.74 | 0.9  | 0 |
| 19 | China                            | Male   | 70+ years        | 0.67 | 0.61 | 0.74 | 0 |
| 20 | China                            | Male   | Age-standardized | 0.8  | 0.73 | 0.88 | 0 |
| 21 | China                            | Female | All Ages         | 2.44 | 2.39 | 2.49 | 0 |
| 22 | China                            | Female | 15-49 years      | 1.51 | 1.38 | 1.64 | 0 |
| 23 | China                            | Female | 50-69 years      | 1.07 | 1.01 | 1.13 | 0 |
| 24 | China                            | Female | 70+ years        | 0.9  | 0.85 | 0.95 | 0 |
| 25 | China                            | Female | Age-standardized | 1    | 0.94 | 1.05 | 0 |
| 26 | China                            | Both   | All Ages         | 2.22 | 2.17 | 2.27 | 0 |
| 27 | China                            | Both   | 15-49 years      | 1.34 | 1.21 | 1.47 | 0 |
| 28 | China                            | Both   | 50-69 years      | 0.91 | 0.84 | 0.98 | 0 |
| 29 | China                            | Both   | 70+ years        | 0.81 | 0.75 | 0.87 | 0 |
| 30 | China                            | Both   | Age-standardized | 1.35 | 1.26 | 1.43 | 0 |
| 31 | Bolivia                          | Both   | All Ages         | 1.98 | 1.94 | 2.02 | 0 |
| 32 | Brunei                           | Male   | 15-49 years      | 1.23 | 1.16 | 1.3  | 0 |
| 33 | Brunei                           | Male   | 50-69 years      | 1.08 | 1.02 | 1.14 | 0 |
| 34 | Brunei                           | Male   | 70+ years        | 0.86 | 0.82 | 0.9  | 0 |
| 35 | Brunei                           | Male   | Age-standardized | 1.09 | 1.03 | 1.16 | 0 |
| 36 | Brunei                           | Female | All Ages         | 2.6  | 2.51 | 2.69 | 0 |
| 37 | Brunei                           | Female | 15-49 years      | 1.57 | 1.45 | 1.69 | 0 |
| 38 | Brunei                           | Female | 50-69 years      | 1.32 | 1.22 | 1.42 | 0 |
| 39 | Brunei                           | Female | 70+ years        | 1.26 | 1.17 | 1.35 | 0 |
| 40 | Brunei                           | Female | Age-standardized | 1.36 | 1.25 | 1.47 | 0 |
| 41 | Brunei                           | Both   | All Ages         | 2.15 | 2.1  | 2.19 | 0 |
| 42 | Brunei                           | Both   | 15-49 years      | 1.3  | 1.25 | 1.35 | 0 |
| 43 | Brunei                           | Both   | 50-69 years      | 1.11 | 1.04 | 1.18 | 0 |
| 44 | Brunei                           | Both   | 70+ years        | 0.93 | 0.88 | 0.97 | 0 |
| 45 | Brunei                           | Both   | Age-standardized | 1.35 | 1.26 | 1.43 | 0 |
| 46 | Saint Vincent and the Grenadines | Both   | All Ages         | 2.39 | 2.34 | 2.44 | 0 |
| 47 | Morocco                          | Male   | 15-49 years      | 1.68 | 1.66 | 1.7  | 0 |
| 48 | Morocco                          | Male   | 50-69 years      | 1.26 | 1.24 | 1.29 | 0 |
| 49 | Morocco                          | Male   | 70+ years        | 1.12 | 1.1  | 1.14 | 0 |
| 50 | Morocco                          | Male   | Age-standardized | 1.31 | 1.29 | 1.33 | 0 |
| 51 | Morocco                          | Female | All Ages         | 2.38 | 2.34 | 2.43 | 0 |
| 52 | Morocco                          | Female | 15-49 years      | 1.67 | 1.63 | 1.71 | 0 |
| 53 | Morocco                          | Female | 50-69 years      | 1.23 | 1.21 | 1.25 | 0 |
| 54 | Morocco                          | Female | 70+ years        | 1.12 | 1.11 | 1.13 | 0 |
| 55 | Morocco                          | Female | Age-standardized | 1.27 | 1.24 | 1.29 | 0 |
| 56 | Morocco                          | Both   | All Ages         | 2.39 | 2.34 | 2.44 | 0 |
| 57 | Morocco                          | Both   | 15-49 years      | 1.68 | 1.64 | 1.71 | 0 |

|    |             |        |                  |      |      |      |   |
|----|-------------|--------|------------------|------|------|------|---|
| 1  |             |        |                  |      |      |      |   |
| 2  | Morocco     | Both   | 50-69 years      | 1.28 | 1.25 | 1.31 | 0 |
| 3  | Morocco     | Both   | 70+ years        | 1.06 | 1.04 | 1.07 | 0 |
| 4  | El Salvador | Both   | Age-standardized | 1.33 | 1.2  | 1.46 | 0 |
| 5  | Lithuania   | Male   | All Ages         | 1.54 | 1.47 | 1.61 | 0 |
| 6  | Lithuania   | Male   | 15-49 years      | 0.9  | 0.86 | 0.94 | 0 |
| 7  | Lithuania   | Male   | 50-69 years      | 0.36 | 0.33 | 0.4  | 0 |
| 8  | Lithuania   | Male   | 70+ years        | 0.6  | 0.52 | 0.67 | 0 |
| 9  | Lithuania   | Male   | Age-standardized | 0.61 | 0.57 | 0.65 | 0 |
| 10 | Lithuania   | Female | All Ages         | 2.3  | 2.19 | 2.41 | 0 |
| 11 | Lithuania   | Female | 15-49 years      | 1.16 | 1.1  | 1.22 | 0 |
| 12 | Lithuania   | Female | 50-69 years      | 1    | 0.93 | 1.07 | 0 |
| 13 | Lithuania   | Female | 70+ years        | 1.44 | 1.34 | 1.55 | 0 |
| 14 | Lithuania   | Female | Age-standardized | 1.13 | 1.06 | 1.2  | 0 |
| 15 | Lithuania   | Both   | All Ages         | 1.81 | 1.73 | 1.9  | 0 |
| 16 | Lithuania   | Both   | 15-49 years      | 1    | 0.95 | 1.04 | 0 |
| 17 | Lithuania   | Both   | 50-69 years      | 0.66 | 0.62 | 0.7  | 0 |
| 18 | Lithuania   | Both   | 70+ years        | 1.04 | 0.95 | 1.13 | 0 |
| 19 | Lithuania   | Both   | Age-standardized | 1.33 | 1.29 | 1.38 | 0 |
| 20 | Ghana       | Both   | Age-standardized | 1.33 | 1.29 | 1.38 | 0 |
| 21 | Botswana    | Male   | All Ages         | 2.4  | 2.33 | 2.46 | 0 |
| 22 | Botswana    | Male   | 15-49 years      | 1.65 | 1.56 | 1.74 | 0 |
| 23 | Botswana    | Male   | 50-69 years      | 1.12 | 1.08 | 1.16 | 0 |
| 24 | Botswana    | Male   | 70+ years        | 1.04 | 1.01 | 1.08 | 0 |
| 25 | Botswana    | Male   | Age-standardized | 1.21 | 1.18 | 1.25 | 0 |
| 26 | Botswana    | Female | All Ages         | 2.17 | 2.12 | 2.21 | 0 |
| 27 | Botswana    | Female | 15-49 years      | 1.43 | 1.36 | 1.51 | 0 |
| 28 | Botswana    | Female | 50-69 years      | 0.97 | 0.92 | 1.01 | 0 |
| 29 | Botswana    | Female | 70+ years        | 1.09 | 1.04 | 1.14 | 0 |
| 30 | Botswana    | Female | Age-standardized | 1.06 | 1.02 | 1.1  | 0 |
| 31 | Botswana    | Both   | All Ages         | 2.34 | 2.28 | 2.4  | 0 |
| 32 | Botswana    | Both   | 15-49 years      | 1.64 | 1.55 | 1.72 | 0 |
| 33 | Botswana    | Both   | 50-69 years      | 1.02 | 0.97 | 1.06 | 0 |
| 34 | Botswana    | Both   | 70+ years        | 1.04 | 0.96 | 1.13 | 0 |
| 35 | Botswana    | Both   | Age-standardized | 1.32 | 1.25 | 1.39 | 0 |
| 36 | Venezuela   | Both   | Age-standardized | 1.32 | 1.25 | 1.39 | 0 |
| 37 | Gabon       | Male   | All Ages         | 1.75 | 1.69 | 1.8  | 0 |
| 38 | Gabon       | Male   | 15-49 years      | 1.34 | 1.28 | 1.41 | 0 |
| 39 | Gabon       | Male   | 50-69 years      | 1.08 | 1.04 | 1.12 | 0 |
| 40 | Gabon       | Male   | 70+ years        | 1.02 | 0.98 | 1.07 | 0 |
| 41 | Gabon       | Male   | Age-standardized | 1.18 | 1.12 | 1.24 | 0 |
| 42 | Gabon       | Female | All Ages         | 1.66 | 1.59 | 1.73 | 0 |
| 43 | Gabon       | Female | 15-49 years      | 1.43 | 1.37 | 1.5  | 0 |
| 44 | Gabon       | Female | 50-69 years      | 1.08 | 1.03 | 1.13 | 0 |
| 45 | Gabon       | Female | 70+ years        | 1.29 | 1.22 | 1.37 | 0 |
| 46 | Gabon       | Female | Age-standardized | 1.22 | 1.15 | 1.28 | 0 |
| 47 | Gabon       | Both   | All Ages         | 1.69 | 1.64 | 1.75 | 0 |
| 48 | Gabon       | Both   | 15-49 years      | 1.32 | 1.26 | 1.38 | 0 |
| 49 | Gabon       | Both   | 50-69 years      | 1.2  | 1.14 | 1.26 | 0 |
| 50 | Gabon       | Both   | 70+ years        | 1.12 | 1.07 | 1.18 | 0 |
| 51 | Gabon       | Both   | Age-standardized | 1.31 | 1.23 | 1.4  | 0 |
| 52 | Algeria     | Both   | Age-standardized | 1.31 | 1.23 | 1.4  | 0 |
| 53 | Seychelles  | Male   | All Ages         | 2.15 | 2.09 | 2.22 | 0 |
| 54 | Seychelles  | Male   | 15-49 years      | 1.57 | 1.52 | 1.62 | 0 |
| 55 | Seychelles  | Male   | 50-69 years      | 0.96 | 0.92 | 1    | 0 |
| 56 | Seychelles  | Male   | 70+ years        | 0.81 | 0.78 | 0.83 | 0 |
| 57 | Seychelles  | Male   | Age-standardized | 1.05 | 1.01 | 1.09 | 0 |
| 58 | Seychelles  | Female | All Ages         | 2.26 | 2.19 | 2.32 | 0 |
| 59 | Seychelles  | Female | 15-49 years      | 1.9  | 1.82 | 1.99 | 0 |
| 60 | Seychelles  | Female | 50-69 years      | 1.22 | 1.19 | 1.24 | 0 |

|    |              |        |                  |       |       |      |       |
|----|--------------|--------|------------------|-------|-------|------|-------|
| 1  |              |        |                  |       |       |      |       |
| 2  | Seychelles   | Female | 70+ years        | 1.11  | 1.07  | 1.15 | 0     |
| 3  | Seychelles   | Female | Age-standardized | 1.25  | 1.22  | 1.28 | 0     |
| 4  | Seychelles   | Both   | All Ages         | 2.22  | 2.16  | 2.27 | 0     |
| 5  | Seychelles   | Both   | 15-49 years      | 1.74  | 1.68  | 1.8  | 0     |
| 6  | Seychelles   | Both   | 50-69 years      | 1.11  | 1.08  | 1.14 | 0     |
| 7  | Seychelles   | Both   | 70+ years        | 0.99  | 0.95  | 1.02 | 0     |
| 8  | Honduras     | Both   | Age-standardized | 1.3   | 1.21  | 1.38 | 0     |
| 9  | Montenegro   | Male   | All Ages         | 1.12  | 1.08  | 1.15 | 0     |
| 10 | Montenegro   | Male   | 15-49 years      | 0.57  | 0.49  | 0.65 | 0     |
| 11 | Montenegro   | Male   | 50-69 years      | -0.05 | -0.15 | 0.04 | 0.239 |
| 12 | Montenegro   | Male   | 70+ years        | 0.29  | 0.25  | 0.32 | 0     |
| 13 | Montenegro   | Male   | Age-standardized | 0.25  | 0.16  | 0.33 | 0     |
| 14 | Montenegro   | Female | All Ages         | 1.62  | 1.54  | 1.7  | 0     |
| 15 | Montenegro   | Female | 15-49 years      | 0.79  | 0.71  | 0.88 | 0     |
| 16 | Montenegro   | Female | 50-69 years      | 0.62  | 0.55  | 0.7  | 0     |
| 17 | Montenegro   | Female | 70+ years        | 0.88  | 0.75  | 1    | 0     |
| 18 | Montenegro   | Female | Age-standardized | 0.66  | 0.55  | 0.76 | 0     |
| 19 | Montenegro   | Both   | All Ages         | 1.32  | 1.26  | 1.37 | 0     |
| 20 | Montenegro   | Both   | 15-49 years      | 0.63  | 0.55  | 0.72 | 0     |
| 21 | Montenegro   | Both   | 50-69 years      | 0.26  | 0.18  | 0.34 | 0     |
| 22 | Montenegro   | Both   | 70+ years        | 0.64  | 0.56  | 0.71 | 0     |
| 23 | Turkmenistan | Both   | Age-standardized | 1.3   | 1.23  | 1.37 | 0     |
| 24 | Albania      | Male   | All Ages         | 2.39  | 2.32  | 2.45 | 0     |
| 25 | Albania      | Male   | 15-49 years      | 0.78  | 0.75  | 0.81 | 0     |
| 26 | Albania      | Male   | 50-69 years      | 0.47  | 0.4   | 0.54 | 0     |
| 27 | Albania      | Male   | 70+ years        | 0.64  | 0.59  | 0.69 | 0     |
| 28 | Albania      | Male   | Age-standardized | 0.6   | 0.58  | 0.62 | 0     |
| 29 | Albania      | Female | All Ages         | 2.86  | 2.75  | 2.98 | 0     |
| 30 | Albania      | Female | 15-49 years      | 1.21  | 1.15  | 1.27 | 0     |
| 31 | Albania      | Female | 50-69 years      | 1     | 0.97  | 1.03 | 0     |
| 32 | Albania      | Female | 70+ years        | 1.34  | 1.29  | 1.4  | 0     |
| 33 | Albania      | Female | Age-standardized | 1.01  | 0.95  | 1.06 | 0     |
| 34 | Albania      | Both   | All Ages         | 2.59  | 2.5   | 2.67 | 0     |
| 35 | Albania      | Both   | 15-49 years      | 0.96  | 0.92  | 0.99 | 0     |
| 36 | Albania      | Both   | 50-69 years      | 0.67  | 0.64  | 0.71 | 0     |
| 37 | Albania      | Both   | 70+ years        | 1.09  | 1.03  | 1.15 | 0     |
| 38 | Morocco      | Both   | Age-standardized | 1.29  | 1.27  | 1.32 | 0     |
| 39 | Austria      | Male   | All Ages         | 1.41  | 1.3   | 1.52 | 0     |
| 40 | Austria      | Male   | 15-49 years      | 1.12  | 0.97  | 1.28 | 0     |
| 41 | Austria      | Male   | 50-69 years      | 0.92  | 0.81  | 1.04 | 0     |
| 42 | Austria      | Male   | 70+ years        | 0.66  | 0.57  | 0.76 | 0     |
| 43 | Austria      | Male   | Age-standardized | 0.94  | 0.83  | 1.05 | 0     |
| 44 | Austria      | Female | All Ages         | 1.4   | 1.29  | 1.52 | 0     |
| 45 | Austria      | Female | 15-49 years      | 1.29  | 1.12  | 1.45 | 0     |
| 46 | Austria      | Female | 50-69 years      | 1.07  | 0.96  | 1.19 | 0     |
| 47 | Austria      | Female | 70+ years        | 0.84  | 0.73  | 0.95 | 0     |
| 48 | Austria      | Female | Age-standardized | 1.09  | 0.97  | 1.22 | 0     |
| 49 | Austria      | Both   | All Ages         | 1.43  | 1.32  | 1.54 | 0     |
| 50 | Austria      | Both   | 15-49 years      | 1.16  | 1     | 1.31 | 0     |
| 51 | Austria      | Both   | 50-69 years      | 1.04  | 0.91  | 1.17 | 0     |
| 52 | Austria      | Both   | 70+ years        | 0.98  | 0.88  | 1.07 | 0     |
| 53 | Grenada      | Both   | Age-standardized | 1.29  | 1.22  | 1.37 | 0     |
| 54 | Maldives     | Male   | All Ages         | 3.42  | 3.27  | 3.57 | 0     |
| 55 | Maldives     | Male   | 15-49 years      | 2     | 1.88  | 2.11 | 0     |
| 56 | Maldives     | Male   | 50-69 years      | 1.35  | 1.29  | 1.4  | 0     |
| 57 | Maldives     | Male   | 70+ years        | 1.06  | 1.02  | 1.11 | 0     |

|    |           |        |                  |      |       |      |       |
|----|-----------|--------|------------------|------|-------|------|-------|
| 1  |           |        |                  |      |       |      |       |
| 2  | Maldives  | Male   | Age-standardized | 1.41 | 1.36  | 1.46 | 0     |
| 3  | Maldives  | Female | All Ages         | 3.71 | 3.58  | 3.83 | 0     |
| 4  | Maldives  | Female | 15-49 years      | 2.22 | 2.07  | 2.37 | 0     |
| 5  | Maldives  | Female | 50-69 years      | 1.61 | 1.57  | 1.64 | 0     |
| 6  | Maldives  | Female | 70+ years        | 1.37 | 1.33  | 1.41 | 0     |
| 7  | Maldives  | Female | Age-standardized | 1.59 | 1.53  | 1.65 | 0     |
| 8  | Maldives  | Both   | All Ages         | 3.61 | 3.46  | 3.77 | 0     |
| 9  | Maldives  | Both   | 15-49 years      | 2.21 | 2.05  | 2.38 | 0     |
| 10 | Maldives  | Both   | 50-69 years      | 1.42 | 1.38  | 1.45 | 0     |
| 11 | Maldives  | Both   | 70+ years        | 1.07 | 1.04  | 1.1  | 0     |
| 12 | Peru      | Both   | Age-standardized | 1.28 | 1.24  | 1.32 | 0     |
| 13 | Belarus   | Male   | All Ages         | 1.1  | 1.04  | 1.15 | 0     |
| 14 | Belarus   | Male   | 15-49 years      | 0.74 | 0.59  | 0.89 | 0     |
| 15 | Belarus   | Male   | 50-69 years      | 0.08 | -0.05 | 0.21 | 0.235 |
| 16 | Belarus   | Male   | 70+ years        | 0.32 | 0.3   | 0.35 | 0     |
| 17 | Belarus   | Male   | Age-standardized | 0.42 | 0.31  | 0.52 | 0     |
| 18 | Belarus   | Female | All Ages         | 1.5  | 1.42  | 1.58 | 0     |
| 19 | Belarus   | Female | 15-49 years      | 0.99 | 0.87  | 1.12 | 0     |
| 20 | Belarus   | Female | 50-69 years      | 0.46 | 0.33  | 0.59 | 0     |
| 21 | Belarus   | Female | 70+ years        | 1.06 | 0.95  | 1.17 | 0     |
| 22 | Belarus   | Female | Age-standardized | 0.83 | 0.72  | 0.94 | 0     |
| 23 | Belarus   | Both   | All Ages         | 1.25 | 1.19  | 1.31 | 0     |
| 24 | Belarus   | Both   | 15-49 years      | 0.82 | 0.68  | 0.96 | 0     |
| 25 | Belarus   | Both   | 50-69 years      | 0.28 | 0.15  | 0.41 | 0     |
| 26 | Belarus   | Both   | 70+ years        | 0.8  | 0.75  | 0.84 | 0     |
| 27 | Djibouti  | Both   | Age-standardized | 1.28 | 1.23  | 1.33 | 0     |
| 28 | Palestine | Male   | All Ages         | 1.84 | 1.8   | 1.88 | 0     |
| 29 | Palestine | Male   | 15-49 years      | 1.18 | 1.06  | 1.3  | 0     |
| 30 | Palestine | Male   | 50-69 years      | 0.82 | 0.74  | 0.9  | 0     |
| 31 | Palestine | Male   | 70+ years        | 0.72 | 0.6   | 0.84 | 0     |
| 32 | Palestine | Male   | Age-standardized | 0.87 | 0.77  | 0.97 | 0     |
| 33 | Palestine | Female | All Ages         | 1.61 | 1.55  | 1.68 | 0     |
| 34 | Palestine | Female | 15-49 years      | 1.13 | 1.04  | 1.23 | 0     |
| 35 | Palestine | Female | 50-69 years      | 0.87 | 0.76  | 0.98 | 0     |
| 36 | Palestine | Female | 70+ years        | 0.82 | 0.68  | 0.96 | 0     |
| 37 | Palestine | Female | Age-standardized | 0.9  | 0.78  | 1.01 | 0     |
| 38 | Palestine | Both   | All Ages         | 1.76 | 1.72  | 1.8  | 0     |
| 39 | Palestine | Both   | 15-49 years      | 1.16 | 1.05  | 1.28 | 0     |
| 40 | Palestine | Both   | 50-69 years      | 0.99 | 0.89  | 1.08 | 0     |
| 41 | Palestine | Both   | 70+ years        | 0.68 | 0.58  | 0.79 | 0     |
| 42 | Bahrain   | Both   | Age-standardized | 1.27 | 1.23  | 1.31 | 0     |
| 43 | Australia | Male   | All Ages         | 1.54 | 1.4   | 1.69 | 0     |
| 44 | Australia | Male   | 15-49 years      | 1.26 | 1.11  | 1.42 | 0     |
| 45 | Australia | Male   | 50-69 years      | 1.08 | 0.97  | 1.19 | 0     |
| 46 | Australia | Male   | 70+ years        | 0.73 | 0.63  | 0.82 | 0     |
| 47 | Australia | Male   | Age-standardized | 1.14 | 1.01  | 1.27 | 0     |
| 48 | Australia | Female | All Ages         | 1.63 | 1.5   | 1.76 | 0     |
| 49 | Australia | Female | 15-49 years      | 1.38 | 1.27  | 1.49 | 0     |
| 50 | Australia | Female | 50-69 years      | 1.03 | 0.93  | 1.13 | 0     |
| 51 | Australia | Female | 70+ years        | 0.85 | 0.72  | 0.97 | 0     |
| 52 | Australia | Female | Age-standardized | 1.17 | 1.06  | 1.27 | 0     |
| 53 | Australia | Both   | All Ages         | 1.57 | 1.43  | 1.71 | 0     |
| 54 | Australia | Both   | 15-49 years      | 1.28 | 1.15  | 1.42 | 0     |
| 55 | Australia | Both   | 50-69 years      | 1.04 | 0.93  | 1.15 | 0     |
| 56 | Australia | Both   | 70+ years        | 0.87 | 0.76  | 0.99 | 0     |
| 57 | Guatemala | Both   | Age-standardized | 1.27 | 1.23  | 1.31 | 0     |



|    |                          |        |                  |      |      |      |       |
|----|--------------------------|--------|------------------|------|------|------|-------|
| 1  |                          |        |                  |      |      |      |       |
| 2  | Moldova                  | Male   | All Ages         | 1.51 | 1.41 | 1.61 | 0     |
| 3  | Moldova                  | Male   | 15-49 years      | 0.84 | 0.66 | 1.03 | 0     |
| 4  | Moldova                  | Male   | 50-69 years      | 0.19 | 0.06 | 0.32 | 0.006 |
| 5  | Moldova                  | Male   | 70+ years        | 0.33 | 0.25 | 0.41 | 0     |
| 6  | Moldova                  | Male   | Age-standardized | 0.52 | 0.38 | 0.65 | 0     |
| 7  | Moldova                  | Female | All Ages         | 2.03 | 1.9  | 2.15 | 0     |
| 8  | Moldova                  | Female | 15-49 years      | 1.06 | 0.91 | 1.21 | 0     |
| 9  | Moldova                  | Female | 50-69 years      | 0.72 | 0.59 | 0.86 | 0     |
| 10 | Moldova                  | Female | 70+ years        | 1.12 | 0.98 | 1.27 | 0     |
| 11 | Moldova                  | Female | Age-standardized | 1    | 0.86 | 1.13 | 0     |
| 12 | Moldova                  | Both   | All Ages         | 1.71 | 1.6  | 1.83 | 0     |
| 13 | Moldova                  | Both   | 15-49 years      | 0.96 | 0.79 | 1.14 | 0     |
| 14 | Moldova                  | Both   | 50-69 years      | 0.44 | 0.31 | 0.57 | 0     |
| 15 | Moldova                  | Both   | 70+ years        | 0.74 | 0.63 | 0.85 | 0     |
| 16 | Moldova                  | Both   | Age-standardized | 1.27 | 1.21 | 1.33 | 0     |
| 17 | Mauritius                | Both   | All Ages         | 2.15 | 2.12 | 2.19 | 0     |
| 18 | Costa Rica               | Male   | 15-49 years      | 1.19 | 1.14 | 1.24 | 0     |
| 19 | Costa Rica               | Male   | 50-69 years      | 0.83 | 0.77 | 0.88 | 0     |
| 20 | Costa Rica               | Male   | 70+ years        | 0.58 | 0.53 | 0.63 | 0     |
| 21 | Costa Rica               | Male   | Age-standardized | 0.91 | 0.86 | 0.96 | 0     |
| 22 | Costa Rica               | Female | All Ages         | 2.28 | 2.24 | 2.32 | 0     |
| 23 | Costa Rica               | Female | 15-49 years      | 1.17 | 1.14 | 1.21 | 0     |
| 24 | Costa Rica               | Female | 50-69 years      | 0.85 | 0.83 | 0.87 | 0     |
| 25 | Costa Rica               | Female | 70+ years        | 0.75 | 0.71 | 0.8  | 0     |
| 26 | Costa Rica               | Female | Age-standardized | 0.92 | 0.89 | 0.96 | 0     |
| 27 | Costa Rica               | Both   | All Ages         | 2.17 | 2.13 | 2.2  | 0     |
| 28 | Costa Rica               | Both   | 15-49 years      | 1.15 | 1.1  | 1.2  | 0     |
| 29 | Costa Rica               | Both   | 50-69 years      | 0.79 | 0.75 | 0.84 | 0     |
| 30 | Costa Rica               | Both   | 70+ years        | 0.62 | 0.58 | 0.67 | 0     |
| 31 | Costa Rica               | Both   | Age-standardized | 1.26 | 1.14 | 1.37 | 0     |
| 32 | France                   | Both   | All Ages         | 1.64 | 1.61 | 1.67 | 0     |
| 33 | Low-middle SDI           | Male   | 15-49 years      | 1.25 | 1.24 | 1.25 | 0     |
| 34 | Low-middle SDI           | Male   | 50-69 years      | 1.08 | 1.07 | 1.1  | 0     |
| 35 | Low-middle SDI           | Male   | 70+ years        | 0.8  | 0.76 | 0.83 | 0     |
| 36 | Low-middle SDI           | Male   | Age-standardized | 1.07 | 1.06 | 1.08 | 0     |
| 37 | Low-middle SDI           | Female | All Ages         | 1.64 | 1.61 | 1.67 | 0     |
| 38 | Low-middle SDI           | Female | 15-49 years      | 1.15 | 1.14 | 1.17 | 0     |
| 39 | Low-middle SDI           | Female | 50-69 years      | 0.97 | 0.96 | 0.99 | 0     |
| 40 | Low-middle SDI           | Female | 70+ years        | 0.89 | 0.87 | 0.92 | 0     |
| 41 | Low-middle SDI           | Female | Age-standardized | 0.97 | 0.95 | 0.98 | 0     |
| 42 | Low-middle SDI           | Both   | All Ages         | 1.63 | 1.6  | 1.66 | 0     |
| 43 | Low-middle SDI           | Both   | 15-49 years      | 1.2  | 1.19 | 1.21 | 0     |
| 44 | Low-middle SDI           | Both   | 50-69 years      | 1.01 | 0.99 | 1.02 | 0     |
| 45 | Low-middle SDI           | Both   | 70+ years        | 0.8  | 0.78 | 0.82 | 0     |
| 46 | Low-middle SDI           | Both   | Age-standardized | 1.01 | 1    | 1.02 | 0     |
| 47 | Northern Mariana Islands | Male   | All Ages         | 1.44 | 1.35 | 1.54 | 0     |
| 48 | Northern Mariana Islands | Male   | 15-49 years      | 0.64 | 0.46 | 0.82 | 0     |
| 49 | Northern Mariana Islands | Male   | 50-69 years      | 0.49 | 0.43 | 0.56 | 0     |
| 50 | Northern Mariana Islands | Male   | 70+ years        | 0.31 | 0.27 | 0.36 | 0     |
| 51 | Northern Mariana Islands | Male   | Age-standardized | 0.5  | 0.43 | 0.56 | 0     |
| 52 | Northern Mariana Islands | Female | All Ages         | 2.01 | 1.94 | 2.07 | 0     |
| 53 | Northern Mariana Islands | Female | 15-49 years      | 1.04 | 0.81 | 1.28 | 0     |
| 54 | Northern Mariana Islands | Female | 50-69 years      | 0.67 | 0.63 | 0.71 | 0     |
| 55 | Northern Mariana Islands | Female | 70+ years        | 0.44 | 0.39 | 0.49 | 0     |
| 56 | Northern Mariana Islands | Female | Age-standardized | 0.65 | 0.6  | 0.7  | 0     |
| 57 | Northern Mariana Islands | Both   | All Ages         | 1.69 | 1.6  | 1.77 | 0     |



|    |                          |        |                  |      |      |      |   |
|----|--------------------------|--------|------------------|------|------|------|---|
| 1  |                          |        |                  |      |      |      |   |
| 2  | Northern Mariana Islands | Both   | 15-49 years      | 0.83 | 0.65 | 1.01 | 0 |
| 3  | Northern Mariana Islands | Both   | 50-69 years      | 0.5  | 0.45 | 0.54 | 0 |
| 4  | Northern Mariana Islands | Both   | 70+ years        | 0.35 | 0.29 | 0.4  | 0 |
| 5  | Bosnia and Herzegovina   | Both   | Age-standardized | 1.24 | 1.12 | 1.37 | 0 |
| 6  | Poland                   | Male   | All Ages         | 1.68 | 1.65 | 1.71 | 0 |
| 7  | Poland                   | Male   | 15-49 years      | 0.99 | 0.88 | 1.1  | 0 |
| 8  | Poland                   | Male   | 50-69 years      | 0.39 | 0.3  | 0.48 | 0 |
| 9  | Poland                   | Male   | 70+ years        | 0.69 | 0.61 | 0.77 | 0 |
| 10 | Poland                   | Male   | Age-standardized | 0.73 | 0.7  | 0.76 | 0 |
| 11 | Poland                   | Female | All Ages         | 2.04 | 2.01 | 2.08 | 0 |
| 12 | Poland                   | Female | 15-49 years      | 1.11 | 1.02 | 1.2  | 0 |
| 13 | Poland                   | Female | 50-69 years      | 0.88 | 0.72 | 1.04 | 0 |
| 14 | Poland                   | Female | 70+ years        | 1.14 | 1.1  | 1.17 | 0 |
| 15 | Poland                   | Female | Age-standardized | 1.07 | 1.02 | 1.11 | 0 |
| 16 | Poland                   | Both   | All Ages         | 1.82 | 1.79 | 1.85 | 0 |
| 17 | Poland                   | Both   | 15-49 years      | 1.04 | 0.94 | 1.14 | 0 |
| 18 | Poland                   | Both   | 50-69 years      | 0.63 | 0.52 | 0.74 | 0 |
| 19 | Poland                   | Both   | 70+ years        | 0.96 | 0.91 | 1    | 0 |
| 20 | Poland                   | Both   | Age-standardized | 1.24 | 1.18 | 1.29 | 0 |
| 21 | Suriname                 | Both   | Age-standardized | 1.24 | 1.18 | 1.29 | 0 |
| 22 | Romania                  | Male   | All Ages         | 1.44 | 1.39 | 1.48 | 0 |
| 23 | Romania                  | Male   | 15-49 years      | 1.11 | 1.05 | 1.17 | 0 |
| 24 | Romania                  | Male   | 50-69 years      | 0.3  | 0.21 | 0.39 | 0 |
| 25 | Romania                  | Male   | 70+ years        | 0.63 | 0.54 | 0.72 | 0 |
| 26 | Romania                  | Male   | Age-standardized | 0.59 | 0.57 | 0.61 | 0 |
| 27 | Romania                  | Female | All Ages         | 2.23 | 2.17 | 2.29 | 0 |
| 28 | Romania                  | Female | 15-49 years      | 1.48 | 1.46 | 1.5  | 0 |
| 29 | Romania                  | Female | 50-69 years      | 1.22 | 1.13 | 1.3  | 0 |
| 30 | Romania                  | Female | 70+ years        | 1.29 | 1.22 | 1.36 | 0 |
| 31 | Romania                  | Female | Age-standardized | 1.19 | 1.15 | 1.23 | 0 |
| 32 | Romania                  | Both   | All Ages         | 1.76 | 1.71 | 1.81 | 0 |
| 33 | Romania                  | Both   | 15-49 years      | 1.26 | 1.22 | 1.3  | 0 |
| 34 | Romania                  | Both   | 50-69 years      | 0.69 | 0.61 | 0.77 | 0 |
| 35 | Romania                  | Both   | 70+ years        | 0.95 | 0.87 | 1.03 | 0 |
| 36 | Romania                  | Both   | Age-standardized | 1.24 | 1.2  | 1.29 | 0 |
| 37 | United Arab Emirates     | Both   | Age-standardized | 1.24 | 1.2  | 1.29 | 0 |
| 38 | Bahrain                  | Male   | All Ages         | 2.41 | 2.31 | 2.52 | 0 |
| 39 | Bahrain                  | Male   | 15-49 years      | 1.6  | 1.52 | 1.68 | 0 |
| 40 | Bahrain                  | Male   | 50-69 years      | 1.04 | 1.02 | 1.06 | 0 |
| 41 | Bahrain                  | Male   | 70+ years        | 0.87 | 0.84 | 0.91 | 0 |
| 42 | Bahrain                  | Male   | Age-standardized | 1.14 | 1.12 | 1.16 | 0 |
| 43 | Bahrain                  | Female | All Ages         | 2.68 | 2.6  | 2.77 | 0 |
| 44 | Bahrain                  | Female | 15-49 years      | 1.84 | 1.8  | 1.89 | 0 |
| 45 | Bahrain                  | Female | 50-69 years      | 1.31 | 1.26 | 1.35 | 0 |
| 46 | Bahrain                  | Female | 70+ years        | 1.17 | 1.1  | 1.23 | 0 |
| 47 | Bahrain                  | Female | Age-standardized | 1.35 | 1.3  | 1.41 | 0 |
| 48 | Bahrain                  | Both   | All Ages         | 2.62 | 2.5  | 2.74 | 0 |
| 49 | Bahrain                  | Both   | 15-49 years      | 1.77 | 1.69 | 1.86 | 0 |
| 50 | Bahrain                  | Both   | 50-69 years      | 1.28 | 1.24 | 1.32 | 0 |
| 51 | Bahrain                  | Both   | 70+ years        | 0.9  | 0.87 | 0.93 | 0 |
| 52 | Bahrain                  | Both   | Age-standardized | 1.23 | 1.15 | 1.31 | 0 |
| 53 | Saudi Arabia             | Both   | Age-standardized | 1.23 | 1.15 | 1.31 | 0 |
| 54 | Panama                   | Male   | All Ages         | 1.93 | 1.87 | 1.99 | 0 |
| 55 | Panama                   | Male   | 15-49 years      | 1.45 | 1.38 | 1.52 | 0 |
| 56 | Panama                   | Male   | 50-69 years      | 1.12 | 1.07 | 1.17 | 0 |
| 57 | Panama                   | Male   | 70+ years        | 0.92 | 0.87 | 0.96 | 0 |
| 58 | Panama                   | Male   | Age-standardized | 1.15 | 1.1  | 1.19 | 0 |
| 59 | Panama                   | Female | All Ages         | 2.22 | 2.14 | 2.3  | 0 |
| 60 | Panama                   | Female | 15-49 years      | 1.65 | 1.56 | 1.75 | 0 |

|    |                            |        |                  |      |      |      |   |
|----|----------------------------|--------|------------------|------|------|------|---|
| 1  |                            |        |                  |      |      |      |   |
| 2  | Panama                     | Female | 50-69 years      | 1.33 | 1.27 | 1.39 | 0 |
| 3  | Panama                     | Female | 70+ years        | 1.15 | 1.1  | 1.21 | 0 |
| 4  | Panama                     | Female | Age-standardized | 1.33 | 1.27 | 1.4  | 0 |
| 5  | Panama                     | Both   | All Ages         | 2.05 | 1.98 | 2.12 | 0 |
| 6  | Panama                     | Both   | 15-49 years      | 1.54 | 1.46 | 1.61 | 0 |
| 7  | Panama                     | Both   | 50-69 years      | 1.2  | 1.15 | 1.25 | 0 |
| 8  | Panama                     | Both   | 70+ years        | 1    | 0.96 | 1.05 | 0 |
| 9  | Taiwan (Province of China) | Both   | Age-standardized | 1.22 | 1.16 | 1.28 | 0 |
| 10 | Indonesia                  | Male   | All Ages         | 2.34 | 2.26 | 2.42 | 0 |
| 11 | Indonesia                  | Male   | 15-49 years      | 1.8  | 1.7  | 1.9  | 0 |
| 12 | Indonesia                  | Male   | 50-69 years      | 1.33 | 1.24 | 1.42 | 0 |
| 13 | Indonesia                  | Male   | 70+ years        | 1.12 | 1.06 | 1.19 | 0 |
| 14 | Indonesia                  | Male   | Age-standardized | 1.34 | 1.26 | 1.42 | 0 |
| 15 | Indonesia                  | Female | All Ages         | 1.97 | 1.91 | 2.03 | 0 |
| 16 | Indonesia                  | Female | 15-49 years      | 1.45 | 1.39 | 1.51 | 0 |
| 17 | Indonesia                  | Female | 50-69 years      | 1.01 | 0.97 | 1.05 | 0 |
| 18 | Indonesia                  | Female | 70+ years        | 0.82 | 0.78 | 0.87 | 0 |
| 19 | Indonesia                  | Female | Age-standardized | 0.97 | 0.93 | 1.02 | 0 |
| 20 | Indonesia                  | Both   | All Ages         | 2.22 | 2.17 | 2.28 | 0 |
| 21 | Indonesia                  | Both   | 15-49 years      | 1.71 | 1.64 | 1.79 | 0 |
| 22 | Indonesia                  | Both   | 50-69 years      | 1.25 | 1.19 | 1.31 | 0 |
| 23 | Indonesia                  | Both   | 70+ years        | 0.91 | 0.87 | 0.94 | 0 |
| 24 | Indonesia                  | Both   | Age-standardized | 1.22 | 1.17 | 1.27 | 0 |
| 25 | Panama                     | Both   | Age-standardized | 1.22 | 1.17 | 1.27 | 0 |
| 26 | Solomon Islands            | Male   | All Ages         | 1.48 | 1.38 | 1.57 | 0 |
| 27 | Solomon Islands            | Male   | 15-49 years      | 1.3  | 1.21 | 1.4  | 0 |
| 28 | Solomon Islands            | Male   | 50-69 years      | 0.87 | 0.78 | 0.97 | 0 |
| 29 | Solomon Islands            | Male   | 70+ years        | 0.74 | 0.67 | 0.82 | 0 |
| 30 | Solomon Islands            | Male   | Age-standardized | 0.93 | 0.85 | 1.02 | 0 |
| 31 | Solomon Islands            | Female | All Ages         | 1.89 | 1.82 | 1.96 | 0 |
| 32 | Solomon Islands            | Female | 15-49 years      | 1.53 | 1.46 | 1.6  | 0 |
| 33 | Solomon Islands            | Female | 50-69 years      | 1.15 | 1.09 | 1.21 | 0 |
| 34 | Solomon Islands            | Female | 70+ years        | 0.97 | 0.91 | 1.04 | 0 |
| 35 | Solomon Islands            | Female | Age-standardized | 1.12 | 1.06 | 1.18 | 0 |
| 36 | Solomon Islands            | Both   | All Ages         | 1.65 | 1.57 | 1.74 | 0 |
| 37 | Solomon Islands            | Both   | 15-49 years      | 1.4  | 1.32 | 1.48 | 0 |
| 38 | Solomon Islands            | Both   | 50-69 years      | 0.98 | 0.91 | 1.05 | 0 |
| 39 | Solomon Islands            | Both   | 70+ years        | 0.79 | 0.72 | 0.86 | 0 |
| 40 | Solomon Islands            | Both   | Age-standardized | 1.22 | 1.17 | 1.28 | 0 |
| 41 | Indonesia                  | Both   | Age-standardized | 1.22 | 1.17 | 1.28 | 0 |
| 42 | Paraguay                   | Male   | All Ages         | 1.89 | 1.85 | 1.94 | 0 |
| 43 | Paraguay                   | Male   | 15-49 years      | 1.15 | 1.12 | 1.18 | 0 |
| 44 | Paraguay                   | Male   | 50-69 years      | 0.97 | 0.92 | 1.02 | 0 |
| 45 | Paraguay                   | Male   | 70+ years        | 0.76 | 0.71 | 0.82 | 0 |
| 46 | Paraguay                   | Male   | Age-standardized | 1.02 | 0.96 | 1.07 | 0 |
| 47 | Paraguay                   | Female | All Ages         | 1.95 | 1.9  | 1.99 | 0 |
| 48 | Paraguay                   | Female | 15-49 years      | 1.16 | 1.12 | 1.21 | 0 |
| 49 | Paraguay                   | Female | 50-69 years      | 0.98 | 0.93 | 1.03 | 0 |
| 50 | Paraguay                   | Female | 70+ years        | 0.88 | 0.81 | 0.94 | 0 |
| 51 | Paraguay                   | Female | Age-standardized | 1.02 | 0.96 | 1.07 | 0 |
| 52 | Paraguay                   | Both   | All Ages         | 1.92 | 1.87 | 1.97 | 0 |
| 53 | Paraguay                   | Both   | 15-49 years      | 1.17 | 1.13 | 1.2  | 0 |
| 54 | Paraguay                   | Both   | 50-69 years      | 0.98 | 0.93 | 1.03 | 0 |
| 55 | Paraguay                   | Both   | 70+ years        | 0.82 | 0.76 | 0.88 | 0 |
| 56 | Paraguay                   | Both   | Age-standardized | 1.02 | 0.96 | 1.07 | 0 |
| 57 | Cape Verde                 | Both   | Age-standardized | 1.22 | 1.18 | 1.26 | 0 |
| 58 | El Salvador                | Male   | All Ages         | 2.37 | 2.29 | 2.45 | 0 |
| 59 | El Salvador                | Male   | 15-49 years      | 1.6  | 1.44 | 1.75 | 0 |
| 60 | El Salvador                | Male   | 50-69 years      | 1.28 | 1.15 | 1.41 | 0 |

|    |               |        |                  |      |      |      |   |
|----|---------------|--------|------------------|------|------|------|---|
| 1  |               |        |                  |      |      |      |   |
| 2  | El Salvador   | Male   | 70+ years        | 1.08 | 0.96 | 1.2  | 0 |
| 3  | El Salvador   | Male   | Age-standardized | 1.35 | 1.22 | 1.48 | 0 |
| 4  | El Salvador   | Female | All Ages         | 2.61 | 2.5  | 2.72 | 0 |
| 5  | El Salvador   | Female | 15-49 years      | 1.73 | 1.56 | 1.89 | 0 |
| 6  | El Salvador   | Female | 50-69 years      | 1.35 | 1.23 | 1.48 | 0 |
| 7  | El Salvador   | Female | 70+ years        | 1.23 | 1.1  | 1.35 | 0 |
| 8  | El Salvador   | Female | Age-standardized | 1.38 | 1.25 | 1.51 | 0 |
| 9  | El Salvador   | Both   | All Ages         | 2.46 | 2.37 | 2.55 | 0 |
| 10 | El Salvador   | Both   | 15-49 years      | 1.63 | 1.48 | 1.79 | 0 |
| 11 | El Salvador   | Both   | 50-69 years      | 1.26 | 1.14 | 1.39 | 0 |
| 12 | El Salvador   | Both   | 70+ years        | 1.11 | 0.98 | 1.23 | 0 |
| 13 | United States | Both   | Age-standardized | 1.22 | 1.1  | 1.34 | 0 |
| 14 | Ireland       | Male   | All Ages         | 1.64 | 1.47 | 1.81 | 0 |
| 15 | Ireland       | Male   | 15-49 years      | 1.45 | 1.33 | 1.58 | 0 |
| 16 | Ireland       | Male   | 50-69 years      | 1.03 | 0.92 | 1.13 | 0 |
| 17 | Ireland       | Male   | 70+ years        | 0.77 | 0.67 | 0.86 | 0 |
| 18 | Ireland       | Male   | Age-standardized | 1.06 | 0.94 | 1.18 | 0 |
| 19 | Ireland       | Female | All Ages         | 1.75 | 1.59 | 1.9  | 0 |
| 20 | Ireland       | Female | 15-49 years      | 1.62 | 1.49 | 1.74 | 0 |
| 21 | Ireland       | Female | 50-69 years      | 1.25 | 1.13 | 1.37 | 0 |
| 22 | Ireland       | Female | 70+ years        | 1.14 | 1.02 | 1.26 | 0 |
| 23 | Ireland       | Female | Age-standardized | 1.27 | 1.14 | 1.4  | 0 |
| 24 | Ireland       | Both   | All Ages         | 1.67 | 1.51 | 1.84 | 0 |
| 25 | Ireland       | Both   | 15-49 years      | 1.48 | 1.35 | 1.62 | 0 |
| 26 | Ireland       | Both   | 50-69 years      | 1.11 | 1    | 1.23 | 0 |
| 27 | Ireland       | Both   | 70+ years        | 1.01 | 0.92 | 1.1  | 0 |
| 28 | Malaysia      | Both   | Age-standardized | 1.21 | 1.18 | 1.24 | 0 |
| 29 | Mali          | Male   | All Ages         | 1    | 0.99 | 1.01 | 0 |
| 30 | Mali          | Male   | 15-49 years      | 1.09 | 1.04 | 1.13 | 0 |
| 31 | Mali          | Male   | 50-69 years      | 1.13 | 1.1  | 1.16 | 0 |
| 32 | Mali          | Male   | 70+ years        | 1.15 | 1.12 | 1.19 | 0 |
| 33 | Mali          | Male   | Age-standardized | 1.18 | 1.15 | 1.2  | 0 |
| 34 | Mali          | Female | All Ages         | 0.55 | 0.52 | 0.59 | 0 |
| 35 | Mali          | Female | 15-49 years      | 0.67 | 0.66 | 0.68 | 0 |
| 36 | Mali          | Female | 50-69 years      | 0.76 | 0.74 | 0.78 | 0 |
| 37 | Mali          | Female | 70+ years        | 0.94 | 0.93 | 0.96 | 0 |
| 38 | Mali          | Female | Age-standardized | 0.84 | 0.82 | 0.86 | 0 |
| 39 | Mali          | Both   | All Ages         | 0.84 | 0.82 | 0.85 | 0 |
| 40 | Mali          | Both   | 15-49 years      | 0.94 | 0.91 | 0.96 | 0 |
| 41 | Mali          | Both   | 50-69 years      | 1.03 | 1.01 | 1.04 | 0 |
| 42 | Mali          | Both   | 70+ years        | 1.1  | 1.08 | 1.13 | 0 |
| 43 | Uruguay       | Both   | Age-standardized | 1.21 | 1.17 | 1.26 | 0 |
| 44 | Grenada       | Male   | All Ages         | 2.88 | 2.76 | 3    | 0 |
| 45 | Grenada       | Male   | 15-49 years      | 1.7  | 1.6  | 1.81 | 0 |
| 46 | Grenada       | Male   | 50-69 years      | 1.16 | 1.1  | 1.23 | 0 |
| 47 | Grenada       | Male   | 70+ years        | 1.05 | 0.96 | 1.14 | 0 |
| 48 | Grenada       | Male   | Age-standardized | 1.24 | 1.16 | 1.31 | 0 |
| 49 | Grenada       | Female | All Ages         | 2.59 | 2.48 | 2.7  | 0 |
| 50 | Grenada       | Female | 15-49 years      | 1.61 | 1.54 | 1.67 | 0 |
| 51 | Grenada       | Female | 50-69 years      | 1.1  | 1.03 | 1.16 | 0 |
| 52 | Grenada       | Female | 70+ years        | 1.15 | 1.04 | 1.25 | 0 |
| 53 | Grenada       | Female | Age-standardized | 1.18 | 1.11 | 1.25 | 0 |
| 54 | Grenada       | Both   | All Ages         | 2.8  | 2.7  | 2.9  | 0 |
| 55 | Grenada       | Both   | 15-49 years      | 1.69 | 1.6  | 1.78 | 0 |
| 56 | Grenada       | Both   | 50-69 years      | 1.26 | 1.19 | 1.32 | 0 |
| 57 | Grenada       | Both   | 70+ years        | 1.27 | 1.2  | 1.34 | 0 |

|    |                |        |                  |      |      |      |   |
|----|----------------|--------|------------------|------|------|------|---|
| 1  |                |        |                  |      |      |      |   |
| 2  | Uzbekistan     | Both   | Age-standardized | 1.21 | 1.08 | 1.34 | 0 |
| 3  | Bolivia        | Male   | All Ages         | 2.52 | 2.42 | 2.61 | 0 |
| 4  | Bolivia        | Male   | 15-49 years      | 1.7  | 1.64 | 1.76 | 0 |
| 5  | Bolivia        | Male   | 50-69 years      | 1.38 | 1.31 | 1.46 | 0 |
| 6  | Bolivia        | Male   | 70+ years        | 1.19 | 1.1  | 1.29 | 0 |
| 7  | Bolivia        | Male   | Age-standardized | 1.46 | 1.39 | 1.54 | 0 |
| 8  | Bolivia        | Female | All Ages         | 2.12 | 2.02 | 2.22 | 0 |
| 9  | Bolivia        | Female | 15-49 years      | 1.29 | 1.2  | 1.38 | 0 |
| 10 | Bolivia        | Female | 50-69 years      | 1.09 | 1    | 1.19 | 0 |
| 11 | Bolivia        | Female | 70+ years        | 0.96 | 0.85 | 1.07 | 0 |
| 12 | Bolivia        | Female | Age-standardized | 1.11 | 1    | 1.21 | 0 |
| 13 | Bolivia        | Both   | All Ages         | 2.38 | 2.28 | 2.47 | 0 |
| 14 | Bolivia        | Both   | 15-49 years      | 1.58 | 1.52 | 1.65 | 0 |
| 15 | Bolivia        | Both   | 50-69 years      | 1.29 | 1.2  | 1.37 | 0 |
| 16 | Bolivia        | Both   | 70+ years        | 1.08 | 0.98 | 1.18 | 0 |
| 17 | Yemen          | Both   | Age-standardized | 1.2  | 1.18 | 1.22 | 0 |
| 18 | United Kingdom | Male   | All Ages         | 1.28 | 1.15 | 1.42 | 0 |
| 19 | United Kingdom | Male   | 15-49 years      | 1.15 | 0.99 | 1.31 | 0 |
| 20 | United Kingdom | Male   | 50-69 years      | 1.04 | 0.91 | 1.17 | 0 |
| 21 | United Kingdom | Male   | 70+ years        | 0.73 | 0.62 | 0.84 | 0 |
| 22 | United Kingdom | Male   | Age-standardized | 1.07 | 0.93 | 1.21 | 0 |
| 23 | United Kingdom | Female | All Ages         | 1.43 | 1.28 | 1.58 | 0 |
| 24 | United Kingdom | Female | 15-49 years      | 1.39 | 1.22 | 1.56 | 0 |
| 25 | United Kingdom | Female | 50-69 years      | 1.3  | 1.15 | 1.46 | 0 |
| 26 | United Kingdom | Female | 70+ years        | 1.14 | 1    | 1.27 | 0 |
| 27 | United Kingdom | Female | Age-standardized | 1.33 | 1.17 | 1.48 | 0 |
| 28 | United Kingdom | Both   | All Ages         | 1.36 | 1.22 | 1.5  | 0 |
| 29 | United Kingdom | Both   | 15-49 years      | 1.24 | 1.08 | 1.39 | 0 |
| 30 | United Kingdom | Both   | 50-69 years      | 1.15 | 1.01 | 1.29 | 0 |
| 31 | United Kingdom | Both   | 70+ years        | 1.07 | 0.95 | 1.19 | 0 |
| 32 | Angola         | Both   | Age-standardized | 1.2  | 1.11 | 1.29 | 0 |
| 33 | Belgium        | Male   | All Ages         | 1.2  | 1.04 | 1.37 | 0 |
| 34 | Belgium        | Male   | 15-49 years      | 1.09 | 0.91 | 1.27 | 0 |
| 35 | Belgium        | Male   | 50-69 years      | 0.93 | 0.8  | 1.07 | 0 |
| 36 | Belgium        | Male   | 70+ years        | 0.65 | 0.51 | 0.78 | 0 |
| 37 | Belgium        | Male   | Age-standardized | 0.97 | 0.83 | 1.11 | 0 |
| 38 | Belgium        | Female | All Ages         | 1.31 | 1.13 | 1.49 | 0 |
| 39 | Belgium        | Female | 15-49 years      | 1.23 | 1.02 | 1.45 | 0 |
| 40 | Belgium        | Female | 50-69 years      | 1.04 | 0.91 | 1.18 | 0 |
| 41 | Belgium        | Female | 70+ years        | 0.92 | 0.79 | 1.05 | 0 |
| 42 | Belgium        | Female | Age-standardized | 1.11 | 0.96 | 1.27 | 0 |
| 43 | Belgium        | Both   | All Ages         | 1.24 | 1.08 | 1.41 | 0 |
| 44 | Belgium        | Both   | 15-49 years      | 1.12 | 0.93 | 1.31 | 0 |
| 45 | Belgium        | Both   | 50-69 years      | 1    | 0.86 | 1.13 | 0 |
| 46 | Belgium        | Both   | 70+ years        | 0.89 | 0.75 | 1.02 | 0 |
| 47 | Colombia       | Both   | Age-standardized | 1.19 | 1.14 | 1.24 | 0 |
| 48 | Laos           | Male   | All Ages         | 1.82 | 1.66 | 1.99 | 0 |
| 49 | Laos           | Male   | 15-49 years      | 1.08 | 0.99 | 1.17 | 0 |
| 50 | Laos           | Male   | 50-69 years      | 0.94 | 0.86 | 1.01 | 0 |
| 51 | Laos           | Male   | 70+ years        | 0.77 | 0.71 | 0.84 | 0 |
| 52 | Laos           | Male   | Age-standardized | 0.95 | 0.88 | 1.03 | 0 |
| 53 | Laos           | Female | All Ages         | 1.67 | 1.52 | 1.82 | 0 |
| 54 | Laos           | Female | 15-49 years      | 1.03 | 0.96 | 1.11 | 0 |
| 55 | Laos           | Female | 50-69 years      | 0.96 | 0.93 | 1    | 0 |
| 56 | Laos           | Female | 70+ years        | 0.77 | 0.74 | 0.81 | 0 |
| 57 | Laos           | Female | Age-standardized | 0.91 | 0.87 | 0.95 | 0 |

|    |                |        |                  |      |      |      |   |
|----|----------------|--------|------------------|------|------|------|---|
| 1  |                |        |                  |      |      |      |   |
| 2  | Laos           | Both   | All Ages         | 1.76 | 1.61 | 1.92 | 0 |
| 3  | Laos           | Both   | 15-49 years      | 1.08 | 1.01 | 1.16 | 0 |
| 4  | Laos           | Both   | 50-69 years      | 0.96 | 0.91 | 1.02 | 0 |
| 5  | Laos           | Both   | 70+ years        | 0.77 | 0.72 | 0.81 | 0 |
| 6  | Gabon          | Both   | Age-standardized | 1.19 | 1.12 | 1.25 | 0 |
| 7  | Azerbaijan     | Male   | All Ages         | 1.98 | 1.84 | 2.12 | 0 |
| 8  | Azerbaijan     | Male   | 15-49 years      | 1.38 | 1.26 | 1.49 | 0 |
| 9  | Azerbaijan     | Male   | 50-69 years      | 0.5  | 0.37 | 0.62 | 0 |
| 10 | Azerbaijan     | Male   | 70+ years        | 1.12 | 1.09 | 1.16 | 0 |
| 11 | Azerbaijan     | Male   | Age-standardized | 0.98 | 0.86 | 1.1  | 0 |
| 12 | Azerbaijan     | Female | All Ages         | 2.02 | 1.82 | 2.21 | 0 |
| 13 | Azerbaijan     | Female | 15-49 years      | 1.35 | 1.25 | 1.46 | 0 |
| 14 | Azerbaijan     | Female | 50-69 years      | 0.75 | 0.66 | 0.85 | 0 |
| 15 | Azerbaijan     | Female | 70+ years        | 1.7  | 1.58 | 1.82 | 0 |
| 16 | Azerbaijan     | Female | Age-standardized | 1.16 | 1.02 | 1.3  | 0 |
| 17 | Azerbaijan     | Both   | All Ages         | 2.01 | 1.84 | 2.17 | 0 |
| 18 | Azerbaijan     | Both   | 15-49 years      | 1.39 | 1.27 | 1.5  | 0 |
| 19 | Azerbaijan     | Both   | 50-69 years      | 0.62 | 0.52 | 0.73 | 0 |
| 20 | Azerbaijan     | Both   | 70+ years        | 1.58 | 1.51 | 1.66 | 0 |
| 21 | Azerbaijan     | Both   | Age-standardized | 1.19 | 1.05 | 1.33 | 0 |
| 22 | United Kingdom | Both   | Age-standardized | 1.19 | 1.05 | 1.33 | 0 |
| 23 | Egypt          | Male   | All Ages         | 1.49 | 1.45 | 1.52 | 0 |
| 24 | Egypt          | Male   | 15-49 years      | 1.18 | 1.12 | 1.23 | 0 |
| 25 | Egypt          | Male   | 50-69 years      | 0.88 | 0.87 | 0.89 | 0 |
| 26 | Egypt          | Male   | 70+ years        | 0.77 | 0.76 | 0.78 | 0 |
| 27 | Egypt          | Male   | Age-standardized | 0.96 | 0.95 | 0.97 | 0 |
| 28 | Egypt          | Female | All Ages         | 1.58 | 1.54 | 1.61 | 0 |
| 29 | Egypt          | Female | 15-49 years      | 1.26 | 1.22 | 1.3  | 0 |
| 30 | Egypt          | Female | 50-69 years      | 1.06 | 1.05 | 1.08 | 0 |
| 31 | Egypt          | Female | 70+ years        | 0.93 | 0.91 | 0.96 | 0 |
| 32 | Egypt          | Female | Age-standardized | 1.1  | 1.09 | 1.11 | 0 |
| 33 | Egypt          | Both   | All Ages         | 1.53 | 1.5  | 1.56 | 0 |
| 34 | Egypt          | Both   | 15-49 years      | 1.21 | 1.16 | 1.26 | 0 |
| 35 | Egypt          | Both   | 50-69 years      | 0.98 | 0.97 | 0.99 | 0 |
| 36 | Egypt          | Both   | 70+ years        | 0.81 | 0.79 | 0.82 | 0 |
| 37 | Egypt          | Both   | Age-standardized | 1.19 | 1.09 | 1.3  | 0 |
| 38 | Luxembourg     | Both   | Age-standardized | 1.19 | 1.09 | 1.3  | 0 |
| 39 | Guinea         | Male   | All Ages         | 0.55 | 0.48 | 0.62 | 0 |
| 40 | Guinea         | Male   | 15-49 years      | 0.58 | 0.52 | 0.64 | 0 |
| 41 | Guinea         | Male   | 50-69 years      | 0.61 | 0.53 | 0.68 | 0 |
| 42 | Guinea         | Male   | 70+ years        | 0.64 | 0.59 | 0.68 | 0 |
| 43 | Guinea         | Male   | Age-standardized | 0.66 | 0.59 | 0.72 | 0 |
| 44 | Guinea         | Female | All Ages         | 0.29 | 0.21 | 0.37 | 0 |
| 45 | Guinea         | Female | 15-49 years      | 0.31 | 0.23 | 0.39 | 0 |
| 46 | Guinea         | Female | 50-69 years      | 0.34 | 0.29 | 0.4  | 0 |
| 47 | Guinea         | Female | 70+ years        | 0.49 | 0.47 | 0.52 | 0 |
| 48 | Guinea         | Female | Age-standardized | 0.44 | 0.4  | 0.49 | 0 |
| 49 | Guinea         | Both   | All Ages         | 0.44 | 0.37 | 0.5  | 0 |
| 50 | Guinea         | Both   | 15-49 years      | 0.44 | 0.38 | 0.5  | 0 |
| 51 | Guinea         | Both   | 50-69 years      | 0.56 | 0.49 | 0.64 | 0 |
| 52 | Guinea         | Both   | 70+ years        | 0.58 | 0.52 | 0.65 | 0 |
| 53 | Guinea         | Both   | Age-standardized | 1.19 | 1.08 | 1.29 | 0 |
| 54 | Sweden         | Both   | Age-standardized | 1.19 | 1.08 | 1.29 | 0 |
| 55 | Vanuatu        | Male   | All Ages         | 1.32 | 1.26 | 1.38 | 0 |
| 56 | Vanuatu        | Male   | 15-49 years      | 0.91 | 0.85 | 0.97 | 0 |
| 57 | Vanuatu        | Male   | 50-69 years      | 0.8  | 0.77 | 0.84 | 0 |
| 58 | Vanuatu        | Male   | 70+ years        | 0.72 | 0.69 | 0.74 | 0 |
| 59 | Vanuatu        | Male   | Age-standardized | 0.8  | 0.76 | 0.83 | 0 |
| 60 | Vanuatu        | Female | All Ages         | 1.76 | 1.71 | 1.81 | 0 |



|    |             |        |                  |      |      |      |   |
|----|-------------|--------|------------------|------|------|------|---|
| 1  |             |        |                  |      |      |      |   |
| 2  | Vanuatu     | Female | 15-49 years      | 1.23 | 1.19 | 1.27 | 0 |
| 3  | Vanuatu     | Female | 50-69 years      | 1.18 | 1.14 | 1.21 | 0 |
| 4  | Vanuatu     | Female | 70+ years        | 1    | 0.96 | 1.05 | 0 |
| 5  | Vanuatu     | Female | Age-standardized | 1.12 | 1.08 | 1.15 | 0 |
| 6  | Vanuatu     | Both   | All Ages         | 1.51 | 1.47 | 1.55 | 0 |
| 7  | Vanuatu     | Both   | 15-49 years      | 1.05 | 1.02 | 1.09 | 0 |
| 8  | Vanuatu     | Both   | 50-69 years      | 0.95 | 0.93 | 0.97 | 0 |
| 9  | Vanuatu     | Both   | 70+ years        | 0.82 | 0.8  | 0.84 | 0 |
| 10 | Botswana    | Both   | Age-standardized | 1.18 | 1.14 | 1.23 | 0 |
| 11 | Libya       | Male   | All Ages         | 2.25 | 2.2  | 2.3  | 0 |
| 12 | Libya       | Male   | 15-49 years      | 1.7  | 1.59 | 1.82 | 0 |
| 13 | Libya       | Male   | 50-69 years      | 0.94 | 0.91 | 0.96 | 0 |
| 14 | Libya       | Male   | 70+ years        | 0.81 | 0.79 | 0.83 | 0 |
| 15 | Libya       | Male   | Age-standardized | 1.03 | 1    | 1.06 | 0 |
| 16 | Libya       | Female | All Ages         | 2.87 | 2.8  | 2.93 | 0 |
| 17 | Libya       | Female | 15-49 years      | 2.15 | 2.03 | 2.28 | 0 |
| 18 | Libya       | Female | 50-69 years      | 1.26 | 1.17 | 1.35 | 0 |
| 19 | Libya       | Female | 70+ years        | 1.13 | 1.05 | 1.21 | 0 |
| 20 | Libya       | Female | Age-standardized | 1.3  | 1.21 | 1.4  | 0 |
| 21 | Libya       | Both   | All Ages         | 2.49 | 2.43 | 2.55 | 0 |
| 22 | Libya       | Both   | 15-49 years      | 1.87 | 1.74 | 2    | 0 |
| 23 | Libya       | Both   | 50-69 years      | 0.99 | 0.94 | 1.03 | 0 |
| 24 | Libya       | Both   | 70+ years        | 0.97 | 0.93 | 1.01 | 0 |
| 25 | New Zealand | Both   | Age-standardized | 1.18 | 1.07 | 1.29 | 0 |
| 26 | Estonia     | Male   | All Ages         | 1.46 | 1.39 | 1.52 | 0 |
| 27 | Estonia     | Male   | 15-49 years      | 1.04 | 0.91 | 1.17 | 0 |
| 28 | Estonia     | Male   | 50-69 years      | 0.52 | 0.47 | 0.56 | 0 |
| 29 | Estonia     | Male   | 70+ years        | 0.54 | 0.46 | 0.61 | 0 |
| 30 | Estonia     | Male   | Age-standardized | 0.71 | 0.62 | 0.8  | 0 |
| 31 | Estonia     | Female | All Ages         | 2.08 | 1.94 | 2.21 | 0 |
| 32 | Estonia     | Female | 15-49 years      | 1.27 | 1.16 | 1.38 | 0 |
| 33 | Estonia     | Female | 50-69 years      | 1.14 | 1.03 | 1.25 | 0 |
| 34 | Estonia     | Female | 70+ years        | 1.4  | 1.2  | 1.6  | 0 |
| 35 | Estonia     | Female | Age-standardized | 1.22 | 1.08 | 1.35 | 0 |
| 36 | Estonia     | Both   | All Ages         | 1.71 | 1.62 | 1.8  | 0 |
| 37 | Estonia     | Both   | 15-49 years      | 1.17 | 1.04 | 1.3  | 0 |
| 38 | Estonia     | Both   | 50-69 years      | 0.83 | 0.76 | 0.9  | 0 |
| 39 | Estonia     | Both   | 70+ years        | 1.12 | 0.97 | 1.27 | 0 |
| 40 | Jordan      | Both   | Age-standardized | 1.18 | 1.16 | 1.2  | 0 |
| 41 | India       | Male   | All Ages         | 1.47 | 1.42 | 1.51 | 0 |
| 42 | India       | Male   | 15-49 years      | 0.87 | 0.86 | 0.88 | 0 |
| 43 | India       | Male   | 50-69 years      | 0.74 | 0.72 | 0.75 | 0 |
| 44 | India       | Male   | 70+ years        | 0.73 | 0.7  | 0.76 | 0 |
| 45 | India       | Male   | Age-standardized | 0.77 | 0.76 | 0.78 | 0 |
| 46 | India       | Female | All Ages         | 1.52 | 1.46 | 1.58 | 0 |
| 47 | India       | Female | 15-49 years      | 0.82 | 0.78 | 0.86 | 0 |
| 48 | India       | Female | 50-69 years      | 0.68 | 0.65 | 0.72 | 0 |
| 49 | India       | Female | 70+ years        | 0.86 | 0.82 | 0.89 | 0 |
| 50 | India       | Female | Age-standardized | 0.71 | 0.68 | 0.75 | 0 |
| 51 | India       | Both   | All Ages         | 1.48 | 1.43 | 1.53 | 0 |
| 52 | India       | Both   | 15-49 years      | 0.85 | 0.83 | 0.86 | 0 |
| 53 | India       | Both   | 50-69 years      | 0.68 | 0.65 | 0.7  | 0 |
| 54 | India       | Both   | 70+ years        | 0.71 | 0.69 | 0.74 | 0 |
| 55 | Brazil      | Both   | Age-standardized | 1.18 | 1.15 | 1.2  | 0 |
| 56 | Portugal    | Male   | All Ages         | 1.6  | 1.43 | 1.76 | 0 |
| 57 | Portugal    | Male   | 15-49 years      | 1.35 | 1.19 | 1.51 | 0 |



|    |               |        |                  |      |      |      |   |
|----|---------------|--------|------------------|------|------|------|---|
| 1  |               |        |                  |      |      |      |   |
| 2  | Portugal      | Male   | 50-69 years      | 0.92 | 0.79 | 1.05 | 0 |
| 3  | Portugal      | Male   | 70+ years        | 0.61 | 0.49 | 0.74 | 0 |
| 4  | Portugal      | Male   | Age-standardized | 0.95 | 0.82 | 1.08 | 0 |
| 5  | Portugal      | Female | All Ages         | 1.91 | 1.74 | 2.08 | 0 |
| 6  | Portugal      | Female | 15-49 years      | 1.49 | 1.34 | 1.64 | 0 |
| 7  | Portugal      | Female | 50-69 years      | 1.27 | 1.09 | 1.46 | 0 |
| 8  | Portugal      | Female | 70+ years        | 0.98 | 0.84 | 1.12 | 0 |
| 9  | Portugal      | Female | Age-standardized | 1.19 | 1.04 | 1.34 | 0 |
| 10 | Portugal      | Both   | All Ages         | 1.74 | 1.57 | 1.91 | 0 |
| 11 | Portugal      | Both   | 15-49 years      | 1.4  | 1.24 | 1.56 | 0 |
| 12 | Portugal      | Both   | 50-69 years      | 1.1  | 0.94 | 1.26 | 0 |
| 13 | Portugal      | Both   | 70+ years        | 0.83 | 0.7  | 0.96 | 0 |
| 14 | Portugal      | Both   | Age-standardized | 1.17 | 1.13 | 1.2  | 0 |
| 15 | Seychelles    | Both   | All Ages         | 2.08 | 1.97 | 2.19 | 0 |
| 16 | Dominica      | Male   | 15-49 years      | 1.35 | 1.18 | 1.51 | 0 |
| 17 | Dominica      | Male   | 50-69 years      | 0.82 | 0.74 | 0.9  | 0 |
| 18 | Dominica      | Male   | 70+ years        | 0.72 | 0.64 | 0.8  | 0 |
| 19 | Dominica      | Male   | Age-standardized | 0.95 | 0.86 | 1.03 | 0 |
| 20 | Dominica      | Female | All Ages         | 1.68 | 1.65 | 1.71 | 0 |
| 21 | Dominica      | Female | 15-49 years      | 1.31 | 1.18 | 1.44 | 0 |
| 22 | Dominica      | Female | 50-69 years      | 0.84 | 0.75 | 0.93 | 0 |
| 23 | Dominica      | Female | 70+ years        | 0.81 | 0.73 | 0.89 | 0 |
| 24 | Dominica      | Female | Age-standardized | 0.93 | 0.85 | 1.01 | 0 |
| 25 | Dominica      | Both   | All Ages         | 1.95 | 1.87 | 2.02 | 0 |
| 26 | Dominica      | Both   | 15-49 years      | 1.31 | 1.15 | 1.46 | 0 |
| 27 | Dominica      | Both   | 50-69 years      | 1.05 | 0.95 | 1.15 | 0 |
| 28 | Dominica      | Both   | 70+ years        | 0.83 | 0.74 | 0.91 | 0 |
| 29 | Dominica      | Both   | Age-standardized | 1.17 | 1.08 | 1.25 | 0 |
| 30 | Guyana        | Both   | All Ages         | 1.38 | 1.11 | 1.64 | 0 |
| 31 | Rwanda        | Male   | 15-49 years      | 0.92 | 0.71 | 1.13 | 0 |
| 32 | Rwanda        | Male   | 50-69 years      | 0.73 | 0.58 | 0.87 | 0 |
| 33 | Rwanda        | Male   | 70+ years        | 0.82 | 0.69 | 0.95 | 0 |
| 34 | Rwanda        | Male   | Age-standardized | 0.83 | 0.69 | 0.96 | 0 |
| 35 | Rwanda        | Female | All Ages         | 0.99 | 0.8  | 1.18 | 0 |
| 36 | Rwanda        | Female | 15-49 years      | 0.5  | 0.33 | 0.68 | 0 |
| 37 | Rwanda        | Female | 50-69 years      | 0.23 | 0.12 | 0.33 | 0 |
| 38 | Rwanda        | Female | 70+ years        | 0.46 | 0.34 | 0.59 | 0 |
| 39 | Rwanda        | Female | Age-standardized | 0.36 | 0.24 | 0.47 | 0 |
| 40 | Rwanda        | Both   | All Ages         | 1.22 | 0.98 | 1.47 | 0 |
| 41 | Rwanda        | Both   | 15-49 years      | 0.77 | 0.56 | 0.99 | 0 |
| 42 | Rwanda        | Both   | 50-69 years      | 0.53 | 0.39 | 0.67 | 0 |
| 43 | Rwanda        | Both   | 70+ years        | 0.38 | 0.25 | 0.51 | 0 |
| 44 | Rwanda        | Both   | Age-standardized | 1.17 | 1.1  | 1.25 | 0 |
| 45 | Guinea-Bissau | Both   | All Ages         | 2.4  | 2.33 | 2.47 | 0 |
| 46 | Venezuela     | Male   | 15-49 years      | 1.61 | 1.55 | 1.67 | 0 |
| 47 | Venezuela     | Male   | 50-69 years      | 1.2  | 1.13 | 1.26 | 0 |
| 48 | Venezuela     | Male   | 70+ years        | 0.99 | 0.93 | 1.06 | 0 |
| 49 | Venezuela     | Male   | Age-standardized | 1.28 | 1.22 | 1.35 | 0 |
| 50 | Venezuela     | Female | All Ages         | 2.52 | 2.44 | 2.61 | 0 |
| 51 | Venezuela     | Female | 15-49 years      | 1.67 | 1.6  | 1.73 | 0 |
| 52 | Venezuela     | Female | 50-69 years      | 1.32 | 1.25 | 1.4  | 0 |
| 53 | Venezuela     | Female | 70+ years        | 1.13 | 1.06 | 1.21 | 0 |
| 54 | Venezuela     | Female | Age-standardized | 1.36 | 1.28 | 1.43 | 0 |
| 55 | Venezuela     | Both   | All Ages         | 2.45 | 2.38 | 2.53 | 0 |
| 56 | Venezuela     | Both   | 15-49 years      | 1.65 | 1.58 | 1.71 | 0 |
| 57 | Venezuela     | Both   | 50-69 years      | 1.25 | 1.18 | 1.31 | 0 |
| 58 | Venezuela     | Both   | Age-standardized | 1.17 | 1.08 | 1.25 | 0 |
| 59 | Venezuela     | Both   | All Ages         | 2.45 | 2.38 | 2.53 | 0 |
| 60 | Venezuela     | Both   | 15-49 years      | 1.65 | 1.58 | 1.71 | 0 |
| 61 | Venezuela     | Both   | 50-69 years      | 1.25 | 1.18 | 1.31 | 0 |

|    |             |        |                  |       |       |      |       |
|----|-------------|--------|------------------|-------|-------|------|-------|
| 1  |             |        |                  |       |       |      |       |
| 2  | Venezuela   | Both   | 70+ years        | 1.05  | 0.99  | 1.11 | 0     |
| 3  | Jamaica     | Both   | Age-standardized | 1.17  | 1.05  | 1.29 | 0     |
| 4  | Ethiopia    | Male   | All Ages         | 1.17  | 1.07  | 1.26 | 0     |
| 5  | Ethiopia    | Male   | 15-49 years      | 0.92  | 0.84  | 0.99 | 0     |
| 6  | Ethiopia    | Male   | 50-69 years      | 0.9   | 0.85  | 0.94 | 0     |
| 7  | Ethiopia    | Male   | 70+ years        | 0.86  | 0.82  | 0.9  | 0     |
| 8  | Ethiopia    | Male   | Age-standardized | 0.93  | 0.88  | 0.98 | 0     |
| 9  | Ethiopia    | Female | All Ages         | 0.18  | 0.04  | 0.31 | 0.012 |
| 10 | Ethiopia    | Female | 15-49 years      | -0.04 | -0.12 | 0.03 | 0.254 |
| 11 | Ethiopia    | Female | 50-69 years      | 0     | -0.04 | 0.03 | 0.801 |
| 12 | Ethiopia    | Female | 70+ years        | 0.05  | 0.02  | 0.08 | 0.004 |
| 13 | Ethiopia    | Female | Age-standardized | 0.02  | -0.01 | 0.04 | 0.112 |
| 14 | Ethiopia    | Both   | All Ages         | 0.85  | 0.74  | 0.96 | 0     |
| 15 | Ethiopia    | Both   | 15-49 years      | 0.63  | 0.56  | 0.7  | 0     |
| 16 | Ethiopia    | Both   | 50-69 years      | 0.56  | 0.55  | 0.57 | 0     |
| 17 | Ethiopia    | Both   | 70+ years        | 0.74  | 0.7   | 0.77 | 0     |
| 18 | Ethiopia    | Both   | Age-standardized | 1.16  | 1.04  | 1.27 | 0     |
| 19 | Puerto Rico | Both   | Age-standardized | 1.16  | 1.04  | 1.27 | 0     |
| 20 | Somalia     | Male   | All Ages         | 0.58  | 0.53  | 0.62 | 0     |
| 21 | Somalia     | Male   | 15-49 years      | 0.56  | 0.39  | 0.73 | 0     |
| 22 | Somalia     | Male   | 50-69 years      | 0.54  | 0.46  | 0.62 | 0     |
| 23 | Somalia     | Male   | 70+ years        | 0.57  | 0.5   | 0.63 | 0     |
| 24 | Somalia     | Male   | Age-standardized | 0.5   | 0.44  | 0.56 | 0     |
| 25 | Somalia     | Female | All Ages         | -0.01 | -0.05 | 0.04 | 0.816 |
| 26 | Somalia     | Female | 15-49 years      | -0.04 | -0.19 | 0.12 | 0.639 |
| 27 | Somalia     | Female | 50-69 years      | 0.01  | -0.07 | 0.08 | 0.888 |
| 28 | Somalia     | Female | 70+ years        | 0.12  | 0.06  | 0.18 | 0     |
| 29 | Somalia     | Female | Age-standardized | -0.01 | -0.07 | 0.05 | 0.716 |
| 30 | Somalia     | Both   | All Ages         | 0.35  | 0.3   | 0.4  | 0     |
| 31 | Somalia     | Both   | 15-49 years      | 0.34  | 0.18  | 0.5  | 0     |
| 32 | Somalia     | Both   | 50-69 years      | 0.31  | 0.23  | 0.39 | 0     |
| 33 | Somalia     | Both   | 70+ years        | 0.28  | 0.21  | 0.35 | 0     |
| 34 | Somalia     | Both   | Age-standardized | 1.16  | 1.14  | 1.18 | 0     |
| 35 | Syria       | Both   | Age-standardized | 1.16  | 1.14  | 1.18 | 0     |
| 36 | Togo        | Male   | All Ages         | 1.9   | 1.86  | 1.94 | 0     |
| 37 | Togo        | Male   | 15-49 years      | 1.44  | 1.38  | 1.51 | 0     |
| 38 | Togo        | Male   | 50-69 years      | 1.12  | 1.04  | 1.19 | 0     |
| 39 | Togo        | Male   | 70+ years        | 1.18  | 1.11  | 1.25 | 0     |
| 40 | Togo        | Male   | Age-standardized | 1.18  | 1.11  | 1.25 | 0     |
| 41 | Togo        | Female | All Ages         | 1.71  | 1.7   | 1.72 | 0     |
| 42 | Togo        | Female | 15-49 years      | 1.1   | 1.06  | 1.14 | 0     |
| 43 | Togo        | Female | 50-69 years      | 0.82  | 0.79  | 0.84 | 0     |
| 44 | Togo        | Female | 70+ years        | 0.96  | 0.93  | 0.99 | 0     |
| 45 | Togo        | Female | Age-standardized | 0.87  | 0.85  | 0.89 | 0     |
| 46 | Togo        | Both   | All Ages         | 1.83  | 1.8   | 1.86 | 0     |
| 47 | Togo        | Both   | 15-49 years      | 1.32  | 1.27  | 1.36 | 0     |
| 48 | Togo        | Both   | 50-69 years      | 0.96  | 0.89  | 1.03 | 0     |
| 49 | Togo        | Both   | 70+ years        | 0.83  | 0.79  | 0.86 | 0     |
| 50 | Togo        | Both   | Age-standardized | 1.16  | 1.13  | 1.19 | 0     |
| 51 | Lebanon     | Both   | Age-standardized | 1.16  | 1.13  | 1.19 | 0     |
| 52 | Oman        | Male   | All Ages         | 3.39  | 3.07  | 3.71 | 0     |
| 53 | Oman        | Male   | 15-49 years      | 2.3   | 2.06  | 2.53 | 0     |
| 54 | Oman        | Male   | 50-69 years      | 1.96  | 1.85  | 2.07 | 0     |
| 55 | Oman        | Male   | 70+ years        | 1.73  | 1.61  | 1.85 | 0     |
| 56 | Oman        | Male   | Age-standardized | 2.04  | 1.93  | 2.15 | 0     |
| 57 | Oman        | Female | All Ages         | 3.8   | 3.54  | 4.05 | 0     |
| 58 | Oman        | Female | 15-49 years      | 2.55  | 2.24  | 2.87 | 0     |
| 59 | Oman        | Female | 50-69 years      | 2.09  | 1.95  | 2.23 | 0     |
| 60 | Oman        | Female | 70+ years        | 1.95  | 1.78  | 2.13 | 0     |

|    |           |        |                  |      |      |      |   |
|----|-----------|--------|------------------|------|------|------|---|
| 1  |           |        |                  |      |      |      |   |
| 2  | Oman      | Female | Age-standardized | 2.13 | 1.98 | 2.27 | 0 |
| 3  | Oman      | Both   | All Ages         | 3.66 | 3.28 | 4.04 | 0 |
| 4  | Oman      | Both   | 15-49 years      | 2.46 | 2.11 | 2.81 | 0 |
| 5  | Oman      | Both   | 50-69 years      | 2.08 | 1.96 | 2.2  | 0 |
| 6  | Oman      | Both   | 70+ years        | 1.89 | 1.77 | 2.01 | 0 |
| 7  | Spain     | Both   | Age-standardized | 1.15 | 1.01 | 1.29 | 0 |
| 8  | Canada    | Male   | All Ages         | 1.36 | 1.26 | 1.46 | 0 |
| 9  | Canada    | Male   | 15-49 years      | 0.83 | 0.71 | 0.94 | 0 |
| 10 | Canada    | Male   | 50-69 years      | 0.83 | 0.75 | 0.9  | 0 |
| 11 | Canada    | Male   | 70+ years        | 0.5  | 0.42 | 0.58 | 0 |
| 12 | Canada    | Male   | Age-standardized | 0.81 | 0.72 | 0.89 | 0 |
| 13 | Canada    | Female | All Ages         | 1.14 | 1.05 | 1.23 | 0 |
| 14 | Canada    | Female | 15-49 years      | 0.53 | 0.43 | 0.64 | 0 |
| 15 | Canada    | Female | 50-69 years      | 0.54 | 0.5  | 0.58 | 0 |
| 16 | Canada    | Female | 70+ years        | 0.44 | 0.33 | 0.55 | 0 |
| 17 | Canada    | Female | Age-standardized | 0.55 | 0.46 | 0.63 | 0 |
| 18 | Canada    | Both   | All Ages         | 1.28 | 1.18 | 1.37 | 0 |
| 19 | Canada    | Both   | 15-49 years      | 0.72 | 0.62 | 0.83 | 0 |
| 20 | Canada    | Both   | 50-69 years      | 0.72 | 0.66 | 0.79 | 0 |
| 21 | Canada    | Both   | 70+ years        | 0.54 | 0.45 | 0.63 | 0 |
| 22 | Canada    | Both   | Age-standardized | 1.15 | 1.03 | 1.27 | 0 |
| 23 | Australia | Both   | All Ages         | 2.45 | 2.36 | 2.54 | 0 |
| 24 | Vietnam   | Male   | 15-49 years      | 1.4  | 1.37 | 1.43 | 0 |
| 25 | Vietnam   | Male   | 50-69 years      | 0.89 | 0.84 | 0.93 | 0 |
| 26 | Vietnam   | Male   | 70+ years        | 0.77 | 0.72 | 0.83 | 0 |
| 27 | Vietnam   | Male   | Age-standardized | 0.9  | 0.85 | 0.95 | 0 |
| 28 | Vietnam   | Female | All Ages         | 2.5  | 2.43 | 2.57 | 0 |
| 29 | Vietnam   | Female | 15-49 years      | 1.57 | 1.54 | 1.6  | 0 |
| 30 | Vietnam   | Female | 50-69 years      | 1.1  | 1.08 | 1.13 | 0 |
| 31 | Vietnam   | Female | 70+ years        | 0.95 | 0.91 | 1    | 0 |
| 32 | Vietnam   | Female | Age-standardized | 1.07 | 1.03 | 1.1  | 0 |
| 33 | Vietnam   | Both   | All Ages         | 2.48 | 2.39 | 2.56 | 0 |
| 34 | Vietnam   | Both   | 15-49 years      | 1.49 | 1.46 | 1.52 | 0 |
| 35 | Vietnam   | Both   | 50-69 years      | 1.01 | 0.98 | 1.04 | 0 |
| 36 | Vietnam   | Both   | 70+ years        | 0.88 | 0.83 | 0.93 | 0 |
| 37 | Vietnam   | Both   | Age-standardized | 1.15 | 1.13 | 1.18 | 0 |
| 38 | Iran      | Male   | All Ages         | 1.31 | 1.25 | 1.36 | 0 |
| 39 | Sudan     | Male   | 15-49 years      | 1.23 | 1.19 | 1.27 | 0 |
| 40 | Sudan     | Male   | 50-69 years      | 1.08 | 1.06 | 1.1  | 0 |
| 41 | Sudan     | Male   | 70+ years        | 0.82 | 0.81 | 0.84 | 0 |
| 42 | Sudan     | Male   | Age-standardized | 1.1  | 1.07 | 1.13 | 0 |
| 43 | Sudan     | Female | All Ages         | 1.39 | 1.28 | 1.49 | 0 |
| 44 | Sudan     | Female | 15-49 years      | 1.35 | 1.28 | 1.42 | 0 |
| 45 | Sudan     | Female | 50-69 years      | 1.18 | 1.15 | 1.21 | 0 |
| 46 | Sudan     | Female | 70+ years        | 0.96 | 0.92 | 0.99 | 0 |
| 47 | Sudan     | Female | Age-standardized | 1.19 | 1.15 | 1.22 | 0 |
| 48 | Sudan     | Both   | All Ages         | 1.34 | 1.27 | 1.41 | 0 |
| 49 | Sudan     | Both   | 15-49 years      | 1.28 | 1.24 | 1.32 | 0 |
| 50 | Sudan     | Both   | 50-69 years      | 1.14 | 1.13 | 1.16 | 0 |
| 51 | Sudan     | Both   | 70+ years        | 0.91 | 0.9  | 0.93 | 0 |
| 52 | Sudan     | Both   | Age-standardized | 1.15 | 1.1  | 1.2  | 0 |
| 53 | Haiti     | Both   | All Ages         | 1.67 | 1.54 | 1.79 | 0 |
| 54 | Cyprus    | Male   | 15-49 years      | 1.1  | 0.98 | 1.23 | 0 |
| 55 | Cyprus    | Male   | 50-69 years      | 0.93 | 0.79 | 1.07 | 0 |
| 56 | Cyprus    | Male   | 70+ years        | 0.72 | 0.6  | 0.83 | 0 |
| 57 | Cyprus    | Male   | Age-standardized | 0.94 | 0.79 | 1.09 | 0 |

|    |                                |        |                  |      |      |      |   |
|----|--------------------------------|--------|------------------|------|------|------|---|
| 1  |                                |        |                  |      |      |      |   |
| 2  | Cyprus                         | Female | All Ages         | 1.9  | 1.74 | 2.05 | 0 |
| 3  | Cyprus                         | Female | 15-49 years      | 1.36 | 1.2  | 1.51 | 0 |
| 4  | Cyprus                         | Female | 50-69 years      | 1.2  | 1.02 | 1.39 | 0 |
| 5  | Cyprus                         | Female | 70+ years        | 1.06 | 0.88 | 1.25 | 0 |
| 6  | Cyprus                         | Female | Age-standardized | 1.18 | 1    | 1.37 | 0 |
| 7  | Cyprus                         | Both   | All Ages         | 1.73 | 1.59 | 1.87 | 0 |
| 8  | Cyprus                         | Both   | 15-49 years      | 1.14 | 1.01 | 1.28 | 0 |
| 9  | Cyprus                         | Both   | 50-69 years      | 1.08 | 0.91 | 1.24 | 0 |
| 10 | Cyprus                         | Both   | 70+ years        | 0.87 | 0.74 | 1    | 0 |
| 11 | Chile                          | Both   | Age-standardized | 1.15 | 1.04 | 1.25 | 0 |
| 12 | Italy                          | Male   | All Ages         | 1.06 | 0.93 | 1.19 | 0 |
| 13 | Italy                          | Male   | 15-49 years      | 0.99 | 0.85 | 1.13 | 0 |
| 14 | Italy                          | Male   | 50-69 years      | 0.65 | 0.55 | 0.74 | 0 |
| 15 | Italy                          | Male   | 70+ years        | 0.42 | 0.33 | 0.5  | 0 |
| 16 | Italy                          | Male   | Age-standardized | 0.66 | 0.57 | 0.75 | 0 |
| 17 | Italy                          | Female | All Ages         | 1.38 | 1.21 | 1.54 | 0 |
| 18 | Italy                          | Female | 15-49 years      | 1.29 | 1.15 | 1.44 | 0 |
| 19 | Italy                          | Female | 50-69 years      | 0.93 | 0.77 | 1.08 | 0 |
| 20 | Italy                          | Female | 70+ years        | 0.71 | 0.59 | 0.83 | 0 |
| 21 | Italy                          | Female | Age-standardized | 0.92 | 0.79 | 1.05 | 0 |
| 22 | Italy                          | Both   | All Ages         | 1.21 | 1.07 | 1.35 | 0 |
| 23 | Italy                          | Both   | 15-49 years      | 1.11 | 0.98 | 1.25 | 0 |
| 24 | Italy                          | Both   | 50-69 years      | 0.79 | 0.67 | 0.91 | 0 |
| 25 | Italy                          | Both   | 70+ years        | 0.59 | 0.49 | 0.7  | 0 |
| 26 | Italy                          | Both   | Age-standardized | 1.15 | 1.09 | 1.21 | 0 |
| 27 | Trinidad and Tobago            | Both   | All Ages         | 1.93 | 1.87 | 1.98 | 0 |
| 28 | Benin                          | Male   | All Ages         | 1.58 | 1.49 | 1.67 | 0 |
| 29 | Benin                          | Male   | 15-49 years      | 1.45 | 1.37 | 1.53 | 0 |
| 30 | Benin                          | Male   | 50-69 years      | 1.45 | 1.36 | 1.54 | 0 |
| 31 | Benin                          | Male   | 70+ years        | 1.45 | 1.36 | 1.54 | 0 |
| 32 | Benin                          | Male   | Age-standardized | 1.54 | 1.45 | 1.63 | 0 |
| 33 | Benin                          | Female | All Ages         | 1.59 | 1.52 | 1.67 | 0 |
| 34 | Benin                          | Female | 15-49 years      | 1.43 | 1.33 | 1.54 | 0 |
| 35 | Benin                          | Female | 50-69 years      | 1.3  | 1.22 | 1.37 | 0 |
| 36 | Benin                          | Female | 70+ years        | 1.46 | 1.38 | 1.55 | 0 |
| 37 | Benin                          | Female | Age-standardized | 1.43 | 1.34 | 1.53 | 0 |
| 38 | Benin                          | Both   | All Ages         | 1.83 | 1.78 | 1.88 | 0 |
| 39 | Benin                          | Both   | 15-49 years      | 1.61 | 1.53 | 1.7  | 0 |
| 40 | Benin                          | Both   | 50-69 years      | 1.46 | 1.38 | 1.54 | 0 |
| 41 | Benin                          | Both   | 70+ years        | 1.22 | 1.16 | 1.27 | 0 |
| 42 | Benin                          | Both   | Age-standardized | 1.15 | 1.01 | 1.29 | 0 |
| 43 | Federated States of Micronesia | Both   | All Ages         | 2.07 | 2.01 | 2.12 | 0 |
| 44 | Puerto Rico                    | Male   | All Ages         | 1.34 | 1.24 | 1.44 | 0 |
| 45 | Puerto Rico                    | Male   | 15-49 years      | 1.03 | 0.96 | 1.1  | 0 |
| 46 | Puerto Rico                    | Male   | 50-69 years      | 0.73 | 0.69 | 0.77 | 0 |
| 47 | Puerto Rico                    | Male   | 70+ years        | 0.73 | 0.69 | 0.77 | 0 |
| 48 | Puerto Rico                    | Male   | Age-standardized | 1.06 | 0.99 | 1.14 | 0 |
| 49 | Puerto Rico                    | Female | All Ages         | 2.38 | 2.22 | 2.55 | 0 |
| 50 | Puerto Rico                    | Female | 15-49 years      | 1.43 | 1.24 | 1.63 | 0 |
| 51 | Puerto Rico                    | Female | 50-69 years      | 1.32 | 1.15 | 1.49 | 0 |
| 52 | Puerto Rico                    | Female | 70+ years        | 1.14 | 0.97 | 1.31 | 0 |
| 53 | Puerto Rico                    | Female | Age-standardized | 1.26 | 1.08 | 1.43 | 0 |
| 54 | Puerto Rico                    | Both   | All Ages         | 2.2  | 2.1  | 2.3  | 0 |
| 55 | Puerto Rico                    | Both   | 15-49 years      | 1.39 | 1.25 | 1.53 | 0 |
| 56 | Puerto Rico                    | Both   | 50-69 years      | 1.16 | 1.04 | 1.27 | 0 |
| 57 | Puerto Rico                    | Both   | 70+ years        | 0.89 | 0.8  | 0.99 | 0 |
| 58 | Puerto Rico                    | Both   | Age-standardized | 1.14 | 1.01 | 1.27 | 0 |
| 59 | Ireland                        | Both   | All Ages         | 1.66 | 1.61 | 1.71 | 0 |
| 60 | Macedonia                      | Male   | All Ages         | 1.66 | 1.61 | 1.71 | 0 |

|    |             |        |                  |      |      |      |   |
|----|-------------|--------|------------------|------|------|------|---|
| 1  |             |        |                  |      |      |      |   |
| 2  | Macedonia   | Male   | 15-49 years      | 1.01 | 0.96 | 1.07 | 0 |
| 3  | Macedonia   | Male   | 50-69 years      | 0.34 | 0.29 | 0.4  | 0 |
| 4  | Macedonia   | Male   | 70+ years        | 0.61 | 0.55 | 0.67 | 0 |
| 5  | Macedonia   | Male   | Age-standardized | 0.65 | 0.62 | 0.68 | 0 |
| 6  | Macedonia   | Female | All Ages         | 2.3  | 2.22 | 2.37 | 0 |
| 7  | Macedonia   | Female | 15-49 years      | 1.23 | 1.17 | 1.3  | 0 |
| 8  | Macedonia   | Female | 50-69 years      | 1.1  | 1.04 | 1.16 | 0 |
| 9  | Macedonia   | Female | 70+ years        | 1.33 | 1.27 | 1.39 | 0 |
| 10 | Macedonia   | Female | Age-standardized | 1.13 | 1.06 | 1.2  | 0 |
| 11 | Macedonia   | Both   | All Ages         | 1.92 | 1.86 | 1.97 | 0 |
| 12 | Macedonia   | Both   | 15-49 years      | 1.11 | 1.06 | 1.17 | 0 |
| 13 | Macedonia   | Both   | 50-69 years      | 0.69 | 0.65 | 0.74 | 0 |
| 14 | Macedonia   | Both   | 70+ years        | 0.89 | 0.84 | 0.93 | 0 |
| 15 | Macedonia   | Both   | Age-standardized | 1.14 | 1.12 | 1.17 | 0 |
| 16 | Sudan       | Both   | All Ages         | 1.28 | 1.2  | 1.35 | 0 |
| 17 | Latvia      | Male   | 15-49 years      | 0.76 | 0.63 | 0.89 | 0 |
| 18 | Latvia      | Male   | 50-69 years      | 0.28 | 0.25 | 0.3  | 0 |
| 19 | Latvia      | Male   | 70+ years        | 0.4  | 0.34 | 0.45 | 0 |
| 20 | Latvia      | Male   | Age-standardized | 0.45 | 0.38 | 0.53 | 0 |
| 21 | Latvia      | Female | All Ages         | 1.86 | 1.73 | 1.98 | 0 |
| 22 | Latvia      | Female | 15-49 years      | 0.97 | 0.85 | 1.1  | 0 |
| 23 | Latvia      | Female | 50-69 years      | 0.82 | 0.74 | 0.9  | 0 |
| 24 | Latvia      | Female | 70+ years        | 1.13 | 1    | 1.27 | 0 |
| 25 | Latvia      | Female | Age-standardized | 0.9  | 0.79 | 1    | 0 |
| 26 | Latvia      | Both   | All Ages         | 1.49 | 1.4  | 1.58 | 0 |
| 27 | Latvia      | Both   | 15-49 years      | 0.85 | 0.71 | 0.98 | 0 |
| 28 | Latvia      | Both   | 50-69 years      | 0.54 | 0.5  | 0.58 | 0 |
| 29 | Latvia      | Both   | 70+ years        | 0.88 | 0.76 | 0.99 | 0 |
| 30 | Latvia      | Both   | Age-standardized | 1.14 | 0.99 | 1.29 | 0 |
| 31 | Denmark     | Both   | All Ages         | 2.14 | 2.06 | 2.22 | 0 |
| 32 | Guatemala   | Male   | 15-49 years      | 1.34 | 1.32 | 1.36 | 0 |
| 33 | Guatemala   | Male   | 50-69 years      | 1.22 | 1.18 | 1.26 | 0 |
| 34 | Guatemala   | Male   | 70+ years        | 1.01 | 0.97 | 1.06 | 0 |
| 35 | Guatemala   | Male   | Age-standardized | 1.29 | 1.25 | 1.32 | 0 |
| 36 | Guatemala   | Female | All Ages         | 2.42 | 2.37 | 2.48 | 0 |
| 37 | Guatemala   | Female | 15-49 years      | 1.53 | 1.49 | 1.56 | 0 |
| 38 | Guatemala   | Female | 50-69 years      | 1.31 | 1.26 | 1.36 | 0 |
| 39 | Guatemala   | Female | 70+ years        | 1.2  | 1.14 | 1.26 | 0 |
| 40 | Guatemala   | Female | Age-standardized | 1.35 | 1.3  | 1.4  | 0 |
| 41 | Guatemala   | Both   | All Ages         | 2.25 | 2.18 | 2.32 | 0 |
| 42 | Guatemala   | Both   | 15-49 years      | 1.41 | 1.39 | 1.44 | 0 |
| 43 | Guatemala   | Both   | 50-69 years      | 1.19 | 1.15 | 1.24 | 0 |
| 44 | Guatemala   | Both   | 70+ years        | 1.03 | 0.98 | 1.08 | 0 |
| 45 | Guatemala   | Both   | Age-standardized | 1.13 | 1.07 | 1.19 | 0 |
| 46 | Netherlands | Both   | All Ages         | 1.37 | 1.28 | 1.47 | 0 |
| 47 | Kiribati    | Male   | 15-49 years      | 1.08 | 0.94 | 1.21 | 0 |
| 48 | Kiribati    | Male   | 50-69 years      | 0.89 | 0.77 | 1    | 0 |
| 49 | Kiribati    | Male   | 70+ years        | 0.77 | 0.67 | 0.88 | 0 |
| 50 | Kiribati    | Male   | Age-standardized | 0.97 | 0.85 | 1.09 | 0 |
| 51 | Kiribati    | Female | All Ages         | 1.72 | 1.59 | 1.85 | 0 |
| 52 | Kiribati    | Female | 15-49 years      | 1.37 | 1.22 | 1.52 | 0 |
| 53 | Kiribati    | Female | 50-69 years      | 1.29 | 1.15 | 1.42 | 0 |
| 54 | Kiribati    | Female | 70+ years        | 1.09 | 0.94 | 1.24 | 0 |
| 55 | Kiribati    | Female | Age-standardized | 1.28 | 1.14 | 1.43 | 0 |
| 56 | Kiribati    | Both   | All Ages         | 1.54 | 1.43 | 1.65 | 0 |
| 57 | Kiribati    | Both   | 15-49 years      | 1.22 | 1.08 | 1.36 | 0 |
| 58 | Kiribati    | Both   | 50-69 years      |      |      |      |   |
| 59 | Kiribati    | Both   | 70+ years        |      |      |      |   |
| 60 | Kiribati    | Both   | Age-standardized |      |      |      |   |



|    |          |        |                  |      |      |      |   |
|----|----------|--------|------------------|------|------|------|---|
| 1  |          |        |                  |      |      |      |   |
| 2  | Kiribati | Both   | 50-69 years      | 1.08 | 0.96 | 1.2  | 0 |
| 3  | Kiribati | Both   | 70+ years        | 0.94 | 0.81 | 1.07 | 0 |
| 4  | Greece   | Both   | Age-standardized | 1.13 | 0.96 | 1.29 | 0 |
| 5  | Guyana   | Male   | All Ages         | 2.14 | 2.08 | 2.21 | 0 |
| 6  | Guyana   | Male   | 15-49 years      | 1.47 | 1.3  | 1.63 | 0 |
| 7  | Guyana   | Male   | 50-69 years      | 1.1  | 1.03 | 1.17 | 0 |
| 8  | Guyana   | Male   | 70+ years        | 0.94 | 0.86 | 1.02 | 0 |
| 9  | Guyana   | Male   | Age-standardized | 1.19 | 1.11 | 1.27 | 0 |
| 10 | Guyana   | Female | All Ages         | 2.23 | 2.16 | 2.29 | 0 |
| 11 | Guyana   | Female | 15-49 years      | 1.44 | 1.27 | 1.61 | 0 |
| 12 | Guyana   | Female | 50-69 years      | 1.09 | 1.03 | 1.16 | 0 |
| 13 | Guyana   | Female | 70+ years        | 1.05 | 0.95 | 1.15 | 0 |
| 14 | Guyana   | Female | Age-standardized | 1.16 | 1.08 | 1.24 | 0 |
| 15 | Guyana   | Both   | All Ages         | 2.18 | 2.11 | 2.24 | 0 |
| 16 | Guyana   | Both   | 15-49 years      | 1.46 | 1.29 | 1.63 | 0 |
| 17 | Guyana   | Both   | 50-69 years      | 1.1  | 1.03 | 1.17 | 0 |
| 18 | Guyana   | Both   | 70+ years        | 0.95 | 0.87 | 1.04 | 0 |
| 19 | Guyana   | Both   | Age-standardized | 1.12 | 1.06 | 1.18 | 0 |
| 20 | Brunei   | Both   | Age-standardized | 1.12 | 1.06 | 1.18 | 0 |
| 21 | Israel   | Male   | All Ages         | 1.65 | 1.51 | 1.79 | 0 |
| 22 | Israel   | Male   | 15-49 years      | 1.51 | 1.38 | 1.64 | 0 |
| 23 | Israel   | Male   | 50-69 years      | 1.19 | 1.06 | 1.32 | 0 |
| 24 | Israel   | Male   | 70+ years        | 0.94 | 0.83 | 1.04 | 0 |
| 25 | Israel   | Male   | Age-standardized | 1.27 | 1.14 | 1.4  | 0 |
| 26 | Israel   | Female | All Ages         | 1.8  | 1.66 | 1.93 | 0 |
| 27 | Israel   | Female | 15-49 years      | 1.6  | 1.49 | 1.72 | 0 |
| 28 | Israel   | Female | 50-69 years      | 1.43 | 1.33 | 1.53 | 0 |
| 29 | Israel   | Female | 70+ years        | 1.15 | 1.03 | 1.27 | 0 |
| 30 | Israel   | Female | Age-standardized | 1.44 | 1.33 | 1.56 | 0 |
| 31 | Israel   | Both   | All Ages         | 1.72 | 1.58 | 1.85 | 0 |
| 32 | Israel   | Both   | 15-49 years      | 1.56 | 1.44 | 1.68 | 0 |
| 33 | Israel   | Both   | 50-69 years      | 1.32 | 1.2  | 1.44 | 0 |
| 34 | Israel   | Both   | 70+ years        | 1.02 | 0.92 | 1.12 | 0 |
| 35 | Israel   | Both   | Age-standardized | 1.12 | 0.99 | 1.25 | 0 |
| 36 | Kiribati | Both   | Age-standardized | 1.12 | 0.99 | 1.25 | 0 |
| 37 | Iran     | Male   | All Ages         | 3.03 | 2.96 | 3.1  | 0 |
| 38 | Iran     | Male   | 15-49 years      | 1.87 | 1.76 | 1.97 | 0 |
| 39 | Iran     | Male   | 50-69 years      | 1.1  | 1.08 | 1.13 | 0 |
| 40 | Iran     | Male   | 70+ years        | 0.85 | 0.81 | 0.89 | 0 |
| 41 | Iran     | Male   | Age-standardized | 1.19 | 1.16 | 1.22 | 0 |
| 42 | Iran     | Female | All Ages         | 3.09 | 3.02 | 3.16 | 0 |
| 43 | Iran     | Female | 15-49 years      | 1.78 | 1.64 | 1.92 | 0 |
| 44 | Iran     | Female | 50-69 years      | 1.13 | 1.11 | 1.15 | 0 |
| 45 | Iran     | Female | 70+ years        | 0.97 | 0.95 | 0.99 | 0 |
| 46 | Iran     | Female | Age-standardized | 1.14 | 1.11 | 1.17 | 0 |
| 47 | Iran     | Both   | All Ages         | 3.05 | 2.98 | 3.12 | 0 |
| 48 | Iran     | Both   | 15-49 years      | 1.84 | 1.73 | 1.96 | 0 |
| 49 | Iran     | Both   | 50-69 years      | 1.03 | 1.01 | 1.05 | 0 |
| 50 | Iran     | Both   | 70+ years        | 0.87 | 0.82 | 0.93 | 0 |
| 51 | Iran     | Both   | Age-standardized | 1.12 | 1.02 | 1.21 | 0 |
| 52 | Guam     | Both   | Age-standardized | 1.12 | 1.02 | 1.21 | 0 |
| 53 | Tonga    | Male   | All Ages         | 1.39 | 1.35 | 1.43 | 0 |
| 54 | Tonga    | Male   | 15-49 years      | 1.17 | 1.12 | 1.21 | 0 |
| 55 | Tonga    | Male   | 50-69 years      | 0.61 | 0.58 | 0.65 | 0 |
| 56 | Tonga    | Male   | 70+ years        | 0.5  | 0.47 | 0.52 | 0 |
| 57 | Tonga    | Male   | Age-standardized | 0.73 | 0.7  | 0.75 | 0 |
| 58 | Tonga    | Female | All Ages         | 1.65 | 1.61 | 1.7  | 0 |
| 59 | Tonga    | Female | 15-49 years      | 1.43 | 1.37 | 1.49 | 0 |
| 60 | Tonga    | Female | 50-69 years      | 1.1  | 1.05 | 1.15 | 0 |



|    |             |        |                  |      |      |      |   |
|----|-------------|--------|------------------|------|------|------|---|
| 1  |             |        |                  |      |      |      |   |
| 2  | Tonga       | Female | 70+ years        | 0.82 | 0.76 | 0.88 | 0 |
| 3  | Tonga       | Female | Age-standardized | 1.08 | 1.04 | 1.13 | 0 |
| 4  | Tonga       | Both   | All Ages         | 1.52 | 1.48 | 1.55 | 0 |
| 5  | Tonga       | Both   | 15-49 years      | 1.3  | 1.25 | 1.35 | 0 |
| 6  | Tonga       | Both   | 50-69 years      | 0.86 | 0.82 | 0.9  | 0 |
| 7  | Tonga       | Both   | 70+ years        | 0.66 | 0.62 | 0.7  | 0 |
| 8  | Azerbaijan  | Both   | Age-standardized | 1.1  | 0.97 | 1.23 | 0 |
| 9  | Liberia     | Male   | All Ages         | 0.85 | 0.63 | 1.06 | 0 |
| 10 | Liberia     | Male   | 15-49 years      | 0.95 | 0.71 | 1.18 | 0 |
| 11 | Liberia     | Male   | 50-69 years      | 0.84 | 0.69 | 0.98 | 0 |
| 12 | Liberia     | Male   | 70+ years        | 0.79 | 0.67 | 0.91 | 0 |
| 13 | Liberia     | Male   | Age-standardized | 0.9  | 0.76 | 1.05 | 0 |
| 14 | Liberia     | Female | All Ages         | 1.04 | 0.84 | 1.25 | 0 |
| 15 | Liberia     | Female | 15-49 years      | 1    | 0.77 | 1.23 | 0 |
| 16 | Liberia     | Female | 50-69 years      | 0.78 | 0.62 | 0.94 | 0 |
| 17 | Liberia     | Female | 70+ years        | 0.93 | 0.78 | 1.09 | 0 |
| 18 | Liberia     | Female | Age-standardized | 0.89 | 0.73 | 1.05 | 0 |
| 19 | Liberia     | Both   | All Ages         | 0.92 | 0.71 | 1.13 | 0 |
| 20 | Liberia     | Both   | 15-49 years      | 0.97 | 0.74 | 1.2  | 0 |
| 21 | Liberia     | Both   | 50-69 years      | 0.79 | 0.63 | 0.95 | 0 |
| 22 | Liberia     | Both   | 70+ years        | 0.71 | 0.59 | 0.84 | 0 |
| 23 | Libya       | Both   | Age-standardized | 1.1  | 1.04 | 1.16 | 0 |
| 24 | France      | Male   | All Ages         | 1.52 | 1.37 | 1.66 | 0 |
| 25 | France      | Male   | 15-49 years      | 1.31 | 1.17 | 1.46 | 0 |
| 26 | France      | Male   | 50-69 years      | 1.16 | 1.05 | 1.27 | 0 |
| 27 | France      | Male   | 70+ years        | 0.85 | 0.73 | 0.98 | 0 |
| 28 | France      | Male   | Age-standardized | 1.18 | 1.07 | 1.3  | 0 |
| 29 | France      | Female | All Ages         | 1.73 | 1.59 | 1.88 | 0 |
| 30 | France      | Female | 15-49 years      | 1.53 | 1.37 | 1.68 | 0 |
| 31 | France      | Female | 50-69 years      | 1.33 | 1.23 | 1.44 | 0 |
| 32 | France      | Female | 70+ years        | 1.19 | 1.07 | 1.31 | 0 |
| 33 | France      | Female | Age-standardized | 1.38 | 1.26 | 1.49 | 0 |
| 34 | France      | Both   | All Ages         | 1.58 | 1.44 | 1.73 | 0 |
| 35 | France      | Both   | 15-49 years      | 1.36 | 1.22 | 1.5  | 0 |
| 36 | France      | Both   | 50-69 years      | 1.23 | 1.12 | 1.35 | 0 |
| 37 | France      | Both   | 70+ years        | 1.11 | 0.98 | 1.23 | 0 |
| 38 | Norway      | Both   | Age-standardized | 1.1  | 0.98 | 1.22 | 0 |
| 39 | Serbia      | Male   | All Ages         | 1.05 | 1.01 | 1.09 | 0 |
| 40 | Serbia      | Male   | 15-49 years      | 0.77 | 0.69 | 0.85 | 0 |
| 41 | Serbia      | Male   | 50-69 years      | 0.17 | 0.1  | 0.24 | 0 |
| 42 | Serbia      | Male   | 70+ years        | 0.38 | 0.32 | 0.43 | 0 |
| 43 | Serbia      | Male   | Age-standardized | 0.49 | 0.43 | 0.54 | 0 |
| 44 | Serbia      | Female | All Ages         | 1.83 | 1.75 | 1.9  | 0 |
| 45 | Serbia      | Female | 15-49 years      | 0.95 | 0.87 | 1.03 | 0 |
| 46 | Serbia      | Female | 50-69 years      | 0.86 | 0.78 | 0.94 | 0 |
| 47 | Serbia      | Female | 70+ years        | 1.15 | 1.09 | 1.2  | 0 |
| 48 | Serbia      | Female | Age-standardized | 0.9  | 0.81 | 0.99 | 0 |
| 49 | Serbia      | Both   | All Ages         | 1.37 | 1.32 | 1.42 | 0 |
| 50 | Serbia      | Both   | 15-49 years      | 0.83 | 0.74 | 0.91 | 0 |
| 51 | Serbia      | Both   | 50-69 years      | 0.47 | 0.4  | 0.54 | 0 |
| 52 | Serbia      | Both   | 70+ years        | 0.75 | 0.71 | 0.79 | 0 |
| 53 | Switzerland | Both   | Age-standardized | 1.09 | 1.01 | 1.17 | 0 |
| 54 | Netherlands | Male   | All Ages         | 1.47 | 1.4  | 1.55 | 0 |
| 55 | Netherlands | Male   | 15-49 years      | 1.18 | 1.05 | 1.32 | 0 |
| 56 | Netherlands | Male   | 50-69 years      | 1.1  | 1.02 | 1.17 | 0 |
| 57 | Netherlands | Male   | 70+ years        | 0.83 | 0.76 | 0.9  | 0 |

|    |             |        |                  |      |      |      |       |
|----|-------------|--------|------------------|------|------|------|-------|
| 1  |             |        |                  |      |      |      |       |
| 2  | Netherlands | Male   | Age-standardized | 1.1  | 1.02 | 1.18 | 0     |
| 3  | Netherlands | Female | All Ages         | 1.46 | 1.44 | 1.48 | 0     |
| 4  | Netherlands | Female | 15-49 years      | 1.33 | 1.24 | 1.42 | 0     |
| 5  | Netherlands | Female | 50-69 years      | 1.04 | 1    | 1.08 | 0     |
| 6  | Netherlands | Female | 70+ years        | 0.84 | 0.78 | 0.89 | 0     |
| 7  | Netherlands | Female | Age-standardized | 1.15 | 1.12 | 1.18 | 0     |
| 8  | Netherlands | Both   | All Ages         | 1.47 | 1.42 | 1.52 | 0     |
| 9  | Netherlands | Both   | 15-49 years      | 1.2  | 1.08 | 1.32 | 0     |
| 10 | Netherlands | Both   | 50-69 years      | 1.12 | 1.06 | 1.18 | 0     |
| 11 | Netherlands | Both   | 70+ years        | 1    | 0.96 | 1.04 | 0     |
| 12 | Netherlands | Both   | Age-standardized | 1.09 | 1.03 | 1.14 | 0     |
| 13 | Mexico      | Both   | Age-standardized | 1.09 | 1.03 | 1.14 | 0     |
| 14 | Lesotho     | Male   | All Ages         | 1.45 | 1.43 | 1.48 | 0     |
| 15 | Lesotho     | Male   | 15-49 years      | 1.05 | 0.98 | 1.12 | 0     |
| 16 | Lesotho     | Male   | 50-69 years      | 0.78 | 0.76 | 0.79 | 0     |
| 17 | Lesotho     | Male   | 70+ years        | 0.67 | 0.65 | 0.69 | 0     |
| 18 | Lesotho     | Male   | Age-standardized | 0.84 | 0.82 | 0.85 | 0     |
| 19 | Lesotho     | Female | All Ages         | 1.61 | 1.58 | 1.63 | 0     |
| 20 | Lesotho     | Female | 15-49 years      | 1.11 | 1.04 | 1.17 | 0     |
| 21 | Lesotho     | Female | 50-69 years      | 0.85 | 0.81 | 0.89 | 0     |
| 22 | Lesotho     | Female | 70+ years        | 0.97 | 0.92 | 1.01 | 0     |
| 23 | Lesotho     | Female | Age-standardized | 0.92 | 0.9  | 0.95 | 0     |
| 24 | Lesotho     | Both   | All Ages         | 1.51 | 1.48 | 1.53 | 0     |
| 25 | Lesotho     | Both   | 15-49 years      | 1.1  | 1.03 | 1.17 | 0     |
| 26 | Lesotho     | Both   | 50-69 years      | 0.66 | 0.65 | 0.68 | 0     |
| 27 | Lesotho     | Both   | 70+ years        | 0.7  | 0.67 | 0.73 | 0     |
| 28 | Lesotho     | Both   | Age-standardized | 1.09 | 1.01 | 1.17 | 0     |
| 29 | Bangladesh  | Both   | Age-standardized | 1.09 | 1.01 | 1.17 | 0     |
| 30 | Ukraine     | Male   | All Ages         | 1.03 | 1    | 1.06 | 0     |
| 31 | Ukraine     | Male   | 15-49 years      | 0.72 | 0.59 | 0.85 | 0     |
| 32 | Ukraine     | Male   | 50-69 years      | 0.14 | 0.06 | 0.23 | 0.002 |
| 33 | Ukraine     | Male   | 70+ years        | 0.36 | 0.34 | 0.37 | 0     |
| 34 | Ukraine     | Male   | Age-standardized | 0.43 | 0.35 | 0.5  | 0     |
| 35 | Ukraine     | Female | All Ages         | 1.68 | 1.58 | 1.78 | 0     |
| 36 | Ukraine     | Female | 15-49 years      | 1.22 | 1.11 | 1.33 | 0     |
| 37 | Ukraine     | Female | 50-69 years      | 0.89 | 0.81 | 0.98 | 0     |
| 38 | Ukraine     | Female | 70+ years        | 1.32 | 1.2  | 1.44 | 0     |
| 39 | Ukraine     | Female | Age-standardized | 1.13 | 1.02 | 1.24 | 0     |
| 40 | Ukraine     | Both   | All Ages         | 1.28 | 1.23 | 1.34 | 0     |
| 41 | Ukraine     | Both   | 15-49 years      | 0.87 | 0.75 | 1    | 0     |
| 42 | Ukraine     | Both   | 50-69 years      | 0.45 | 0.38 | 0.53 | 0     |
| 43 | Ukraine     | Both   | 70+ years        | 1.03 | 0.96 | 1.1  | 0     |
| 44 | Ukraine     | Both   | Age-standardized | 1.08 | 1.06 | 1.09 | 0     |
| 45 | Mali        | Both   | Age-standardized | 1.08 | 1.06 | 1.09 | 0     |
| 46 | Ecuador     | Male   | All Ages         | 1.84 | 1.78 | 1.91 | 0     |
| 47 | Ecuador     | Male   | 15-49 years      | 1.18 | 1.13 | 1.24 | 0     |
| 48 | Ecuador     | Male   | 50-69 years      | 0.84 | 0.79 | 0.89 | 0     |
| 49 | Ecuador     | Male   | 70+ years        | 0.67 | 0.61 | 0.73 | 0     |
| 50 | Ecuador     | Male   | Age-standardized | 0.91 | 0.86 | 0.96 | 0     |
| 51 | Ecuador     | Female | All Ages         | 1.6  | 1.51 | 1.69 | 0     |
| 52 | Ecuador     | Female | 15-49 years      | 0.88 | 0.79 | 0.96 | 0     |
| 53 | Ecuador     | Female | 50-69 years      | 0.62 | 0.55 | 0.7  | 0     |
| 54 | Ecuador     | Female | 70+ years        | 0.53 | 0.44 | 0.62 | 0     |
| 55 | Ecuador     | Female | Age-standardized | 0.62 | 0.55 | 0.7  | 0     |
| 56 | Ecuador     | Both   | All Ages         | 1.74 | 1.67 | 1.82 | 0     |
| 57 | Ecuador     | Both   | 15-49 years      | 1.06 | 1    | 1.13 | 0     |
| 58 | Ecuador     | Both   | 50-69 years      | 0.74 | 0.68 | 0.8  | 0     |
| 59 | Ecuador     | Both   | 70+ years        | 0.6  | 0.52 | 0.67 | 0     |
| 60 | Ecuador     | Both   | Age-standardized | 1.08 | 1.05 | 1.11 | 0     |
|    | Qatar       | Both   | Age-standardized | 1.08 | 1.05 | 1.11 | 0     |

|    |               |        |                  |      |      |      |   |
|----|---------------|--------|------------------|------|------|------|---|
| 1  |               |        |                  |      |      |      |   |
| 2  | Myanmar       | Male   | All Ages         | 1.97 | 1.88 | 2.07 | 0 |
| 3  | Myanmar       | Male   | 15-49 years      | 1.43 | 1.34 | 1.52 | 0 |
| 4  | Myanmar       | Male   | 50-69 years      | 1.12 | 1.02 | 1.21 | 0 |
| 5  | Myanmar       | Male   | 70+ years        | 0.93 | 0.85 | 1.01 | 0 |
| 6  | Myanmar       | Male   | Age-standardized | 1.12 | 1.03 | 1.22 | 0 |
| 7  | Myanmar       | Female | All Ages         | 2.07 | 2.01 | 2.13 | 0 |
| 8  | Myanmar       | Female | 15-49 years      | 1.41 | 1.36 | 1.45 | 0 |
| 9  | Myanmar       | Female | 50-69 years      | 1.09 | 1.06 | 1.13 | 0 |
| 10 | Myanmar       | Female | 70+ years        | 0.89 | 0.85 | 0.93 | 0 |
| 11 | Myanmar       | Female | Age-standardized | 1.04 | 1    | 1.09 | 0 |
| 12 | Myanmar       | Both   | All Ages         | 2    | 1.92 | 2.08 | 0 |
| 13 | Myanmar       | Both   | 15-49 years      | 1.41 | 1.34 | 1.48 | 0 |
| 14 | Myanmar       | Both   | 50-69 years      | 1.07 | 1    | 1.14 | 0 |
| 15 | Myanmar       | Both   | 70+ years        | 0.86 | 0.81 | 0.92 | 0 |
| 16 | Saint Lucia   | Both   | Age-standardized | 1.08 | 0.97 | 1.18 | 0 |
| 17 | Nepal         | Male   | All Ages         | 2.46 | 2.25 | 2.66 | 0 |
| 18 | Nepal         | Male   | 15-49 years      | 1.67 | 1.51 | 1.83 | 0 |
| 19 | Nepal         | Male   | 50-69 years      | 1.58 | 1.42 | 1.73 | 0 |
| 20 | Nepal         | Male   | 70+ years        | 1.61 | 1.47 | 1.75 | 0 |
| 21 | Nepal         | Male   | Age-standardized | 1.63 | 1.48 | 1.79 | 0 |
| 22 | Nepal         | Female | All Ages         | 2.56 | 2.28 | 2.83 | 0 |
| 23 | Nepal         | Female | 15-49 years      | 1.67 | 1.46 | 1.89 | 0 |
| 24 | Nepal         | Female | 50-69 years      | 1.54 | 1.35 | 1.73 | 0 |
| 25 | Nepal         | Female | 70+ years        | 1.65 | 1.48 | 1.83 | 0 |
| 26 | Nepal         | Female | Age-standardized | 1.58 | 1.39 | 1.77 | 0 |
| 27 | Nepal         | Both   | All Ages         | 2.47 | 2.24 | 2.7  | 0 |
| 28 | Nepal         | Both   | 15-49 years      | 1.62 | 1.45 | 1.8  | 0 |
| 29 | Nepal         | Both   | 50-69 years      | 1.51 | 1.35 | 1.68 | 0 |
| 30 | Nepal         | Both   | 70+ years        | 1.58 | 1.43 | 1.73 | 0 |
| 31 | Nepal         | Both   | Age-standardized | 1.08 | 0.94 | 1.22 | 0 |
| 32 | Cote d'Ivoire | Both   | Age-standardized | 1.08 | 0.94 | 1.22 | 0 |
| 33 | Namibia       | Male   | All Ages         | 1.53 | 1.45 | 1.61 | 0 |
| 34 | Namibia       | Male   | 15-49 years      | 1.2  | 1.14 | 1.26 | 0 |
| 35 | Namibia       | Male   | 50-69 years      | 0.92 | 0.86 | 0.97 | 0 |
| 36 | Namibia       | Male   | 70+ years        | 0.89 | 0.84 | 0.93 | 0 |
| 37 | Namibia       | Male   | Age-standardized | 0.99 | 0.94 | 1.04 | 0 |
| 38 | Namibia       | Female | All Ages         | 1.64 | 1.55 | 1.72 | 0 |
| 39 | Namibia       | Female | 15-49 years      | 1.18 | 1.13 | 1.24 | 0 |
| 40 | Namibia       | Female | 50-69 years      | 0.98 | 0.95 | 1.02 | 0 |
| 41 | Namibia       | Female | 70+ years        | 1.08 | 1.04 | 1.13 | 0 |
| 42 | Namibia       | Female | Age-standardized | 1.03 | 0.99 | 1.07 | 0 |
| 43 | Namibia       | Both   | All Ages         | 1.57 | 1.5  | 1.65 | 0 |
| 44 | Namibia       | Both   | 15-49 years      | 1.2  | 1.15 | 1.26 | 0 |
| 45 | Namibia       | Both   | 50-69 years      | 0.89 | 0.85 | 0.93 | 0 |
| 46 | Namibia       | Both   | 70+ years        | 0.89 | 0.85 | 0.93 | 0 |
| 47 | Namibia       | Both   | Age-standardized | 1.06 | 0.92 | 1.21 | 0 |
| 48 | Portugal      | Both   | Age-standardized | 1.06 | 0.92 | 1.21 | 0 |
| 49 | Mauritania    | Male   | All Ages         | 1.27 | 1.25 | 1.3  | 0 |
| 50 | Mauritania    | Male   | 15-49 years      | 1.09 | 1.04 | 1.14 | 0 |
| 51 | Mauritania    | Male   | 50-69 years      | 0.99 | 0.97 | 1.01 | 0 |
| 52 | Mauritania    | Male   | 70+ years        | 0.9  | 0.86 | 0.93 | 0 |
| 53 | Mauritania    | Male   | Age-standardized | 1.04 | 1.01 | 1.07 | 0 |
| 54 | Mauritania    | Female | All Ages         | 1.16 | 1.14 | 1.19 | 0 |
| 55 | Mauritania    | Female | 15-49 years      | 1.07 | 1.01 | 1.12 | 0 |
| 56 | Mauritania    | Female | 50-69 years      | 0.93 | 0.9  | 0.97 | 0 |
| 57 | Mauritania    | Female | 70+ years        | 1.08 | 1.05 | 1.12 | 0 |
| 58 | Mauritania    | Female | Age-standardized | 1.03 | 0.99 | 1.07 | 0 |
| 59 | Mauritania    | Both   | All Ages         | 1.22 | 1.2  | 1.25 | 0 |
| 60 | Mauritania    | Both   | All Ages         | 1.22 | 1.2  | 1.25 | 0 |

|    |                      |        |                  |      |      |      |   |
|----|----------------------|--------|------------------|------|------|------|---|
| 1  |                      |        |                  |      |      |      |   |
| 2  | Mauritania           | Both   | 15-49 years      | 1.07 | 1.02 | 1.12 | 0 |
| 3  | Mauritania           | Both   | 50-69 years      | 0.98 | 0.94 | 1.01 | 0 |
| 4  | Mauritania           | Both   | 70+ years        | 1.08 | 1.04 | 1.13 | 0 |
| 5  | Myanmar              | Both   | Age-standardized | 1.06 | 0.99 | 1.13 | 0 |
| 6  | Georgia              | Male   | All Ages         | 1.4  | 1.36 | 1.45 | 0 |
| 7  | Georgia              | Male   | 15-49 years      | 1.01 | 0.94 | 1.07 | 0 |
| 8  | Georgia              | Male   | 50-69 years      | 0.42 | 0.34 | 0.5  | 0 |
| 9  | Georgia              | Male   | 70+ years        | 0.83 | 0.78 | 0.88 | 0 |
| 10 | Georgia              | Male   | Age-standardized | 0.72 | 0.66 | 0.79 | 0 |
| 11 | Georgia              | Female | All Ages         | 1.7  | 1.61 | 1.8  | 0 |
| 12 | Georgia              | Female | 15-49 years      | 1.07 | 1.01 | 1.13 | 0 |
| 13 | Georgia              | Female | 50-69 years      | 0.82 | 0.71 | 0.94 | 0 |
| 14 | Georgia              | Female | 70+ years        | 1.19 | 1.11 | 1.27 | 0 |
| 15 | Georgia              | Female | Age-standardized | 0.95 | 0.89 | 1.02 | 0 |
| 16 | Georgia              | Both   | All Ages         | 1.55 | 1.48 | 1.62 | 0 |
| 17 | Georgia              | Both   | 15-49 years      | 1.06 | 1.02 | 1.1  | 0 |
| 18 | Georgia              | Both   | 50-69 years      | 0.61 | 0.52 | 0.7  | 0 |
| 19 | Georgia              | Both   | 70+ years        | 1.12 | 1.04 | 1.2  | 0 |
| 20 | Georgia              | Both   | Age-standardized | 1.06 | 0.98 | 1.14 | 0 |
| 21 | Cuba                 | Both   | Age-standardized | 1.06 | 0.98 | 1.14 | 0 |
| 22 | Cape Verde           | Male   | All Ages         | 2.75 | 2.58 | 2.92 | 0 |
| 23 | Cape Verde           | Male   | 15-49 years      | 1.73 | 1.66 | 1.79 | 0 |
| 24 | Cape Verde           | Male   | 50-69 years      | 1    | 0.98 | 1.03 | 0 |
| 25 | Cape Verde           | Male   | 70+ years        | 1.06 | 1.01 | 1.1  | 0 |
| 26 | Cape Verde           | Male   | Age-standardized | 1.18 | 1.14 | 1.22 | 0 |
| 27 | Cape Verde           | Female | All Ages         | 2.05 | 1.89 | 2.22 | 0 |
| 28 | Cape Verde           | Female | 15-49 years      | 1.22 | 1.12 | 1.31 | 0 |
| 29 | Cape Verde           | Female | 50-69 years      | 0.8  | 0.73 | 0.87 | 0 |
| 30 | Cape Verde           | Female | 70+ years        | 1.09 | 1.03 | 1.15 | 0 |
| 31 | Cape Verde           | Female | Age-standardized | 0.97 | 0.92 | 1.02 | 0 |
| 32 | Cape Verde           | Both   | All Ages         | 2.52 | 2.35 | 2.69 | 0 |
| 33 | Cape Verde           | Both   | 15-49 years      | 1.65 | 1.58 | 1.72 | 0 |
| 34 | Cape Verde           | Both   | 50-69 years      | 1.01 | 0.94 | 1.07 | 0 |
| 35 | Cape Verde           | Both   | 70+ years        | 1.03 | 1    | 1.06 | 0 |
| 36 | Cape Verde           | Both   | Age-standardized | 1.05 | 1.01 | 1.08 | 0 |
| 37 | Bhutan               | Both   | Age-standardized | 1.05 | 1.01 | 1.08 | 0 |
| 38 | Honduras             | Male   | All Ages         | 2.23 | 2.17 | 2.3  | 0 |
| 39 | Honduras             | Male   | 15-49 years      | 1.42 | 1.37 | 1.47 | 0 |
| 40 | Honduras             | Male   | 50-69 years      | 1.26 | 1.16 | 1.35 | 0 |
| 41 | Honduras             | Male   | 70+ years        | 1.06 | 0.98 | 1.14 | 0 |
| 42 | Honduras             | Male   | Age-standardized | 1.26 | 1.19 | 1.34 | 0 |
| 43 | Honduras             | Female | All Ages         | 2.43 | 2.36 | 2.5  | 0 |
| 44 | Honduras             | Female | 15-49 years      | 1.6  | 1.53 | 1.67 | 0 |
| 45 | Honduras             | Female | 50-69 years      | 1.35 | 1.27 | 1.44 | 0 |
| 46 | Honduras             | Female | 70+ years        | 1.27 | 1.19 | 1.34 | 0 |
| 47 | Honduras             | Female | Age-standardized | 1.39 | 1.3  | 1.48 | 0 |
| 48 | Honduras             | Both   | All Ages         | 2.3  | 2.24 | 2.37 | 0 |
| 49 | Honduras             | Both   | 15-49 years      | 1.48 | 1.42 | 1.54 | 0 |
| 50 | Honduras             | Both   | 50-69 years      | 1.27 | 1.18 | 1.37 | 0 |
| 51 | Honduras             | Both   | 70+ years        | 1.14 | 1.07 | 1.22 | 0 |
| 52 | Honduras             | Both   | Age-standardized | 1.05 | 1.01 | 1.1  | 0 |
| 53 | Dominican Republic   | Both   | Age-standardized | 1.05 | 1.01 | 1.1  | 0 |
| 54 | Virgin Islands, U.S. | Male   | All Ages         | 2.06 | 1.97 | 2.14 | 0 |
| 55 | Virgin Islands, U.S. | Male   | 15-49 years      | 1.08 | 1    | 1.16 | 0 |
| 56 | Virgin Islands, U.S. | Male   | 50-69 years      | 0.91 | 0.86 | 0.96 | 0 |
| 57 | Virgin Islands, U.S. | Male   | 70+ years        | 0.65 | 0.62 | 0.67 | 0 |
| 58 | Virgin Islands, U.S. | Male   | Age-standardized | 0.89 | 0.84 | 0.95 | 0 |
| 59 | Virgin Islands, U.S. | Female | All Ages         | 2.01 | 1.89 | 2.13 | 0 |
| 60 | Virgin Islands, U.S. | Female | 15-49 years      | 0.87 | 0.74 | 1    | 0 |

|    |                          |        |                  |      |       |      |       |
|----|--------------------------|--------|------------------|------|-------|------|-------|
| 1  |                          |        |                  |      |       |      |       |
| 2  | Virgin Islands, U.S.     | Female | 50-69 years      | 0.77 | 0.68  | 0.86 | 0     |
| 3  | Virgin Islands, U.S.     | Female | 70+ years        | 0.54 | 0.47  | 0.61 | 0     |
| 4  | Virgin Islands, U.S.     | Female | Age-standardized | 0.69 | 0.59  | 0.8  | 0     |
| 5  | Virgin Islands, U.S.     | Both   | All Ages         | 2.03 | 1.93  | 2.12 | 0     |
| 6  | Virgin Islands, U.S.     | Both   | 15-49 years      | 0.99 | 0.9   | 1.08 | 0     |
| 7  | Virgin Islands, U.S.     | Both   | 50-69 years      | 0.83 | 0.76  | 0.9  | 0     |
| 8  | Virgin Islands, U.S.     | Both   | 70+ years        | 0.61 | 0.57  | 0.65 | 0     |
| 9  | Antigua and Barbuda      | Both   | Age-standardized | 1.05 | 0.99  | 1.11 | 0     |
| 10 | Mongolia                 | Male   | All Ages         | 1.78 | 1.7   | 1.86 | 0     |
| 11 | Mongolia                 | Male   | 15-49 years      | 1.06 | 0.96  | 1.17 | 0     |
| 12 | Mongolia                 | Male   | 50-69 years      | 0.11 | 0.06  | 0.16 | 0     |
| 13 | Mongolia                 | Male   | 70+ years        | 0.46 | 0.43  | 0.48 | 0     |
| 14 | Mongolia                 | Male   | Age-standardized | 0.46 | 0.41  | 0.51 | 0     |
| 15 | Mongolia                 | Female | All Ages         | 1.59 | 1.5   | 1.68 | 0     |
| 16 | Mongolia                 | Female | 15-49 years      | 0.7  | 0.59  | 0.81 | 0     |
| 17 | Mongolia                 | Female | 50-69 years      | 0.01 | -0.05 | 0.07 | 0.698 |
| 18 | Mongolia                 | Female | 70+ years        | 0.77 | 0.67  | 0.86 | 0     |
| 19 | Mongolia                 | Female | Age-standardized | 0.33 | 0.25  | 0.4  | 0     |
| 20 | Mongolia                 | Both   | All Ages         | 1.7  | 1.61  | 1.78 | 0     |
| 21 | Mongolia                 | Both   | 15-49 years      | 0.92 | 0.81  | 1.03 | 0     |
| 22 | Mongolia                 | Both   | 50-69 years      | 0.02 | -0.03 | 0.08 | 0.355 |
| 23 | Mongolia                 | Both   | 70+ years        | 0.63 | 0.57  | 0.69 | 0     |
| 24 | Mongolia                 | Both   | Age-standardized | 1.04 | 1.01  | 1.08 | 0     |
| 25 | Mauritania               | Both   | Age-standardized | 1.04 | 1.01  | 1.08 | 0     |
| 26 | Central African Republic | Male   | All Ages         | 0.85 | 0.76  | 0.94 | 0     |
| 27 | Central African Republic | Male   | 15-49 years      | 0.52 | 0.49  | 0.55 | 0     |
| 28 | Central African Republic | Male   | 50-69 years      | 0.39 | 0.36  | 0.42 | 0     |
| 29 | Central African Republic | Male   | 70+ years        | 0.42 | 0.39  | 0.45 | 0     |
| 30 | Central African Republic | Male   | Age-standardized | 0.43 | 0.4   | 0.46 | 0     |
| 31 | Central African Republic | Female | All Ages         | 0.73 | 0.58  | 0.88 | 0     |
| 32 | Central African Republic | Female | 15-49 years      | 0.48 | 0.41  | 0.55 | 0     |
| 33 | Central African Republic | Female | 50-69 years      | 0.47 | 0.4   | 0.54 | 0     |
| 34 | Central African Republic | Female | 70+ years        | 0.65 | 0.58  | 0.72 | 0     |
| 35 | Central African Republic | Female | Age-standardized | 0.53 | 0.46  | 0.6  | 0     |
| 36 | Central African Republic | Both   | All Ages         | 0.81 | 0.7   | 0.92 | 0     |
| 37 | Central African Republic | Both   | 15-49 years      | 0.52 | 0.49  | 0.56 | 0     |
| 38 | Central African Republic | Both   | 50-69 years      | 0.47 | 0.41  | 0.52 | 0     |
| 39 | Central African Republic | Both   | 70+ years        | 0.43 | 0.38  | 0.48 | 0     |
| 40 | Slovenia                 | Both   | Age-standardized | 1.04 | 1     | 1.09 | 0     |
| 41 | Guinea-Bissau            | Male   | All Ages         | 1.61 | 1.5   | 1.72 | 0     |
| 42 | Guinea-Bissau            | Male   | 15-49 years      | 1.38 | 1.29  | 1.47 | 0     |
| 43 | Guinea-Bissau            | Male   | 50-69 years      | 1.2  | 1.11  | 1.28 | 0     |
| 44 | Guinea-Bissau            | Male   | 70+ years        | 1.19 | 1.11  | 1.27 | 0     |
| 45 | Guinea-Bissau            | Male   | Age-standardized | 1.27 | 1.18  | 1.35 | 0     |
| 46 | Guinea-Bissau            | Female | All Ages         | 1.43 | 1.34  | 1.51 | 0     |
| 47 | Guinea-Bissau            | Female | 15-49 years      | 1.11 | 1.04  | 1.18 | 0     |
| 48 | Guinea-Bissau            | Female | 50-69 years      | 0.99 | 0.93  | 1.05 | 0     |
| 49 | Guinea-Bissau            | Female | 70+ years        | 1.14 | 1.08  | 1.21 | 0     |
| 50 | Guinea-Bissau            | Female | Age-standardized | 1.07 | 1     | 1.13 | 0     |
| 51 | Guinea-Bissau            | Both   | All Ages         | 1.54 | 1.44  | 1.64 | 0     |
| 52 | Guinea-Bissau            | Both   | 15-49 years      | 1.28 | 1.2   | 1.35 | 0     |
| 53 | Guinea-Bissau            | Both   | 50-69 years      | 1.12 | 1.04  | 1.2  | 0     |
| 54 | Guinea-Bissau            | Both   | 70+ years        | 0.97 | 0.9   | 1.05 | 0     |
| 55 | Austria                  | Both   | Age-standardized | 1.03 | 0.92  | 1.15 | 0     |
| 56 | Niger                    | Male   | All Ages         | 0.43 | 0.39  | 0.48 | 0     |
| 57 | Niger                    | Male   | 15-49 years      | 0.68 | 0.59  | 0.78 | 0     |
| 58 | Niger                    | Male   | 50-69 years      | 0.77 | 0.69  | 0.85 | 0     |



|    |                                  |        |                  |      |      |      |   |
|----|----------------------------------|--------|------------------|------|------|------|---|
| 1  |                                  |        |                  |      |      |      |   |
| 2  | Niger                            | Male   | 70+ years        | 0.75 | 0.69 | 0.82 | 0 |
| 3  | Niger                            | Male   | Age-standardized | 0.81 | 0.74 | 0.88 | 0 |
| 4  | Niger                            | Female | All Ages         | 0.51 | 0.46 | 0.55 | 0 |
| 5  | Niger                            | Female | 15-49 years      | 0.63 | 0.56 | 0.69 | 0 |
| 6  | Niger                            | Female | 50-69 years      | 0.61 | 0.56 | 0.65 | 0 |
| 7  | Niger                            | Female | 70+ years        | 0.75 | 0.72 | 0.79 | 0 |
| 8  | Niger                            | Female | Age-standardized | 0.67 | 0.63 | 0.7  | 0 |
| 9  | Niger                            | Both   | All Ages         | 0.46 | 0.42 | 0.5  | 0 |
| 10 | Niger                            | Both   | 15-49 years      | 0.67 | 0.58 | 0.75 | 0 |
| 11 | Niger                            | Both   | 50-69 years      | 0.63 | 0.56 | 0.71 | 0 |
| 12 | Niger                            | Both   | 70+ years        | 0.66 | 0.61 | 0.71 | 0 |
| 13 | Niger                            | Both   | Age-standardized | 1.03 | 0.89 | 1.18 | 0 |
| 14 | Belgium                          | Both   | All Ages         | 2.51 | 2.41 | 2.61 | 0 |
| 15 | Saint Vincent and the Grenadines | Male   | 15-49 years      | 1.6  | 1.47 | 1.73 | 0 |
| 16 | Saint Vincent and the Grenadines | Male   | 50-69 years      | 0.81 | 0.75 | 0.86 | 0 |
| 17 | Saint Vincent and the Grenadines | Male   | 70+ years        | 0.6  | 0.55 | 0.66 | 0 |
| 18 | Saint Vincent and the Grenadines | Male   | Age-standardized | 0.97 | 0.9  | 1.03 | 0 |
| 19 | Saint Vincent and the Grenadines | Female | All Ages         | 3.18 | 3.04 | 3.32 | 0 |
| 20 | Saint Vincent and the Grenadines | Female | 15-49 years      | 2.44 | 2.29 | 2.59 | 0 |
| 21 | Saint Vincent and the Grenadines | Female | 50-69 years      | 1.66 | 1.55 | 1.76 | 0 |
| 22 | Saint Vincent and the Grenadines | Female | 70+ years        | 1.57 | 1.45 | 1.69 | 0 |
| 23 | Saint Vincent and the Grenadines | Female | Age-standardized | 1.8  | 1.68 | 1.92 | 0 |
| 24 | Saint Vincent and the Grenadines | Both   | All Ages         | 2.8  | 2.69 | 2.91 | 0 |
| 25 | Saint Vincent and the Grenadines | Both   | 15-49 years      | 1.93 | 1.8  | 2.06 | 0 |
| 26 | Saint Vincent and the Grenadines | Both   | 50-69 years      | 1.24 | 1.17 | 1.31 | 0 |
| 27 | Saint Vincent and the Grenadines | Both   | 70+ years        | 1.16 | 1.07 | 1.24 | 0 |
| 28 | Paraguay                         | Both   | Age-standardized | 1.02 | 0.96 | 1.08 | 0 |
| 29 | Tanzania                         | Male   | All Ages         | 1.1  | 1.06 | 1.14 | 0 |
| 30 | Tanzania                         | Male   | 15-49 years      | 1.03 | 0.99 | 1.07 | 0 |
| 31 | Tanzania                         | Male   | 50-69 years      | 0.79 | 0.76 | 0.83 | 0 |
| 32 | Tanzania                         | Male   | 70+ years        | 0.81 | 0.76 | 0.86 | 0 |
| 33 | Tanzania                         | Male   | Age-standardized | 0.86 | 0.82 | 0.89 | 0 |
| 34 | Tanzania                         | Female | All Ages         | 0.68 | 0.63 | 0.72 | 0 |
| 35 | Tanzania                         | Female | 15-49 years      | 0.62 | 0.58 | 0.66 | 0 |
| 36 | Tanzania                         | Female | 50-69 years      | 0.37 | 0.33 | 0.4  | 0 |
| 37 | Tanzania                         | Female | 70+ years        | 0.51 | 0.45 | 0.56 | 0 |
| 38 | Tanzania                         | Female | Age-standardized | 0.45 | 0.42 | 0.49 | 0 |
| 39 | Tanzania                         | Both   | All Ages         | 0.93 | 0.9  | 0.97 | 0 |
| 40 | Tanzania                         | Both   | 15-49 years      | 0.88 | 0.84 | 0.91 | 0 |
| 41 | Tanzania                         | Both   | 50-69 years      | 0.65 | 0.61 | 0.69 | 0 |
| 42 | Tanzania                         | Both   | 70+ years        | 0.57 | 0.53 | 0.62 | 0 |
| 43 | Egypt                            | Both   | Age-standardized | 1.02 | 1.01 | 1.03 | 0 |
| 44 | Burkina Faso                     | Male   | All Ages         | 1.37 | 1.31 | 1.43 | 0 |
| 45 | Burkina Faso                     | Male   | 15-49 years      | 1.23 | 1.18 | 1.29 | 0 |
| 46 | Burkina Faso                     | Male   | 50-69 years      | 1.05 | 1    | 1.09 | 0 |
| 47 | Burkina Faso                     | Male   | 70+ years        | 1.05 | 1.02 | 1.09 | 0 |
| 48 | Burkina Faso                     | Male   | Age-standardized | 1.11 | 1.07 | 1.15 | 0 |
| 49 | Burkina Faso                     | Female | All Ages         | 0.95 | 0.9  | 1    | 0 |
| 50 | Burkina Faso                     | Female | 15-49 years      | 0.81 | 0.78 | 0.85 | 0 |
| 51 | Burkina Faso                     | Female | 50-69 years      | 0.67 | 0.64 | 0.71 | 0 |
| 52 | Burkina Faso                     | Female | 70+ years        | 0.81 | 0.78 | 0.83 | 0 |
| 53 | Burkina Faso                     | Female | Age-standardized | 0.77 | 0.74 | 0.8  | 0 |
| 54 | Burkina Faso                     | Both   | All Ages         | 1.22 | 1.17 | 1.27 | 0 |
| 55 | Burkina Faso                     | Both   | 15-49 years      | 1.12 | 1.07 | 1.16 | 0 |
| 56 | Burkina Faso                     | Both   | 50-69 years      | 0.86 | 0.83 | 0.89 | 0 |
| 57 | Burkina Faso                     | Both   | 70+ years        | 0.89 | 0.88 | 0.9  | 0 |
| 58 | Burkina Faso                     | Both   | Age-standardized | 1.03 | 0.89 | 1.18 | 0 |
| 59 | Burkina Faso                     | Both   | All Ages         | 2.51 | 2.41 | 2.61 | 0 |
| 60 | Burkina Faso                     | Both   | 15-49 years      | 1.6  | 1.47 | 1.73 | 0 |
|    | Burkina Faso                     | Both   | 50-69 years      | 0.81 | 0.75 | 0.86 | 0 |
|    | Burkina Faso                     | Both   | 70+ years        | 0.6  | 0.55 | 0.66 | 0 |
|    | Burkina Faso                     | Both   | Age-standardized | 0.97 | 0.9  | 1.03 | 0 |
|    | Burkina Faso                     | Both   | All Ages         | 3.18 | 3.04 | 3.32 | 0 |
|    | Burkina Faso                     | Both   | 15-49 years      | 2.44 | 2.29 | 2.59 | 0 |
|    | Burkina Faso                     | Both   | 50-69 years      | 1.66 | 1.55 | 1.76 | 0 |
|    | Burkina Faso                     | Both   | 70+ years        | 1.57 | 1.45 | 1.69 | 0 |
|    | Burkina Faso                     | Both   | Age-standardized | 1.8  | 1.68 | 1.92 | 0 |
|    | Burkina Faso                     | Both   | All Ages         | 2.8  | 2.69 | 2.91 | 0 |
|    | Burkina Faso                     | Both   | 15-49 years      | 1.93 | 1.8  | 2.06 | 0 |
|    | Burkina Faso                     | Both   | 50-69 years      | 1.24 | 1.17 | 1.31 | 0 |
|    | Burkina Faso                     | Both   | 70+ years        | 1.16 | 1.07 | 1.24 | 0 |
|    | Burkina Faso                     | Both   | Age-standardized | 1.02 | 0.96 | 1.08 | 0 |
|    | Burkina Faso                     | Both   | All Ages         | 1.1  | 1.06 | 1.14 | 0 |
|    | Burkina Faso                     | Both   | 15-49 years      | 1.03 | 0.99 | 1.07 | 0 |
|    | Burkina Faso                     | Both   | 50-69 years      | 0.79 | 0.76 | 0.83 | 0 |
|    | Burkina Faso                     | Both   | 70+ years        | 0.81 | 0.76 | 0.86 | 0 |
|    | Burkina Faso                     | Both   | Age-standardized | 0.86 | 0.82 | 0.89 | 0 |
|    | Burkina Faso                     | Both   | All Ages         | 0.68 | 0.63 | 0.72 | 0 |
|    | Burkina Faso                     | Both   | 15-49 years      | 0.62 | 0.58 | 0.66 | 0 |
|    | Burkina Faso                     | Both   | 50-69 years      | 0.37 | 0.33 | 0.4  | 0 |
|    | Burkina Faso                     | Both   | 70+ years        | 0.51 | 0.45 | 0.56 | 0 |
|    | Burkina Faso                     | Both   | Age-standardized | 0.45 | 0.42 | 0.49 | 0 |
|    | Burkina Faso                     | Both   | All Ages         | 0.93 | 0.9  | 0.97 | 0 |
|    | Burkina Faso                     | Both   | 15-49 years      | 0.88 | 0.84 | 0.91 | 0 |
|    | Burkina Faso                     | Both   | 50-69 years      | 0.65 | 0.61 | 0.69 | 0 |
|    | Burkina Faso                     | Both   | 70+ years        | 0.57 | 0.53 | 0.62 | 0 |
|    | Burkina Faso                     | Both   | Age-standardized | 1.02 | 1.01 | 1.03 | 0 |
|    | Burkina Faso                     | Both   | All Ages         | 1.37 | 1.31 | 1.43 | 0 |
|    | Burkina Faso                     | Both   | 15-49 years      | 1.23 | 1.18 | 1.29 | 0 |
|    | Burkina Faso                     | Both   | 50-69 years      | 1.05 | 1    | 1.09 | 0 |
|    | Burkina Faso                     | Both   | 70+ years        | 1.05 | 1.02 | 1.09 | 0 |
|    | Burkina Faso                     | Both   | Age-standardized | 1.11 | 1.07 | 1.15 | 0 |
|    | Burkina Faso                     | Both   | All Ages         | 0.95 | 0.9  | 1    | 0 |
|    | Burkina Faso                     | Both   | 15-49 years      | 0.81 | 0.78 | 0.85 | 0 |
|    | Burkina Faso                     | Both   | 50-69 years      | 0.67 | 0.64 | 0.71 | 0 |
|    | Burkina Faso                     | Both   | 70+ years        | 0.81 | 0.78 | 0.83 | 0 |
|    | Burkina Faso                     | Both   | Age-standardized | 0.77 | 0.74 | 0.8  | 0 |
|    | Burkina Faso                     | Both   | All Ages         | 1.22 | 1.17 | 1.27 | 0 |
|    | Burkina Faso                     | Both   | 15-49 years      | 1.12 | 1.07 | 1.16 | 0 |
|    | Burkina Faso                     | Both   | 50-69 years      | 0.86 | 0.83 | 0.89 | 0 |
|    | Burkina Faso                     | Both   | 70+ years        | 0.89 | 0.88 | 0.9  | 0 |



|    |                  |        |                  |      |      |      |   |
|----|------------------|--------|------------------|------|------|------|---|
| 1  |                  |        |                  |      |      |      |   |
| 2  | Togo             | Both   | Age-standardized | 1.02 | 0.97 | 1.07 | 0 |
| 3  | Bermuda          | Male   | All Ages         | 1.71 | 1.66 | 1.77 | 0 |
| 4  | Bermuda          | Male   | 15-49 years      | 1.25 | 1.15 | 1.34 | 0 |
| 5  | Bermuda          | Male   | 50-69 years      | 0.89 | 0.85 | 0.93 | 0 |
| 6  | Bermuda          | Male   | 70+ years        | 0.7  | 0.66 | 0.75 | 0 |
| 7  | Bermuda          | Male   | Age-standardized | 0.97 | 0.92 | 1.02 | 0 |
| 8  | Bermuda          | Female | All Ages         | 1.85 | 1.8  | 1.91 | 0 |
| 9  | Bermuda          | Female | 15-49 years      | 1.26 | 1.15 | 1.37 | 0 |
| 10 | Bermuda          | Female | 50-69 years      | 1.02 | 0.97 | 1.08 | 0 |
| 11 | Bermuda          | Female | 70+ years        | 0.85 | 0.77 | 0.93 | 0 |
| 12 | Bermuda          | Female | Age-standardized | 1.05 | 0.98 | 1.12 | 0 |
| 13 | Bermuda          | Both   | All Ages         | 1.77 | 1.72 | 1.82 | 0 |
| 14 | Bermuda          | Both   | 15-49 years      | 1.25 | 1.15 | 1.35 | 0 |
| 15 | Bermuda          | Both   | 50-69 years      | 0.95 | 0.9  | 1    | 0 |
| 16 | Bermuda          | Both   | 70+ years        | 0.81 | 0.74 | 0.88 | 0 |
| 17 | Cyprus           | Both   | Age-standardized | 1.02 | 0.85 | 1.18 | 0 |
| 18 | Marshall Islands | Male   | All Ages         | 2.16 | 2.12 | 2.21 | 0 |
| 19 | Marshall Islands | Male   | 15-49 years      | 1.12 | 1.07 | 1.17 | 0 |
| 20 | Marshall Islands | Male   | 50-69 years      | 0.72 | 0.7  | 0.74 | 0 |
| 21 | Marshall Islands | Male   | 70+ years        | 0.58 | 0.55 | 0.61 | 0 |
| 22 | Marshall Islands | Male   | Age-standardized | 0.78 | 0.76 | 0.8  | 0 |
| 23 | Marshall Islands | Female | All Ages         | 2.44 | 2.37 | 2.52 | 0 |
| 24 | Marshall Islands | Female | 15-49 years      | 1.43 | 1.33 | 1.53 | 0 |
| 25 | Marshall Islands | Female | 50-69 years      | 1.03 | 0.96 | 1.1  | 0 |
| 26 | Marshall Islands | Female | 70+ years        | 0.88 | 0.81 | 0.94 | 0 |
| 27 | Marshall Islands | Female | Age-standardized | 1.02 | 0.97 | 1.08 | 0 |
| 28 | Marshall Islands | Both   | All Ages         | 2.29 | 2.24 | 2.33 | 0 |
| 29 | Marshall Islands | Both   | 15-49 years      | 1.26 | 1.19 | 1.33 | 0 |
| 30 | Marshall Islands | Both   | 50-69 years      | 0.85 | 0.81 | 0.89 | 0 |
| 31 | Marshall Islands | Both   | 70+ years        | 0.74 | 0.7  | 0.79 | 0 |
| 32 | Papua New Guinea | Both   | Age-standardized | 1.02 | 0.99 | 1.06 | 0 |
| 33 | High-middle SDI  | Male   | All Ages         | 2.05 | 2.04 | 2.07 | 0 |
| 34 | High-middle SDI  | Male   | 15-49 years      | 1.5  | 1.41 | 1.58 | 0 |
| 35 | High-middle SDI  | Male   | 50-69 years      | 0.86 | 0.8  | 0.93 | 0 |
| 36 | High-middle SDI  | Male   | 70+ years        | 0.68 | 0.65 | 0.7  | 0 |
| 37 | High-middle SDI  | Male   | Age-standardized | 1.05 | 1    | 1.1  | 0 |
| 38 | High-middle SDI  | Female | All Ages         | 2.36 | 2.35 | 2.37 | 0 |
| 39 | High-middle SDI  | Female | 15-49 years      | 1.71 | 1.63 | 1.78 | 0 |
| 40 | High-middle SDI  | Female | 50-69 years      | 1.38 | 1.34 | 1.42 | 0 |
| 41 | High-middle SDI  | Female | 70+ years        | 1.23 | 1.21 | 1.24 | 0 |
| 42 | High-middle SDI  | Female | Age-standardized | 1.37 | 1.35 | 1.4  | 0 |
| 43 | High-middle SDI  | Both   | All Ages         | 2.18 | 2.17 | 2.2  | 0 |
| 44 | High-middle SDI  | Both   | 15-49 years      | 1.59 | 1.51 | 1.67 | 0 |
| 45 | High-middle SDI  | Both   | 50-69 years      | 1.09 | 1.04 | 1.14 | 0 |
| 46 | High-middle SDI  | Both   | 70+ years        | 1.03 | 1.02 | 1.03 | 0 |
| 47 | High-middle SDI  | Both   | Age-standardized | 1.21 | 1.17 | 1.25 | 0 |
| 48 | Japan            | Male   | All Ages         | 1.21 | 1.14 | 1.29 | 0 |
| 49 | Japan            | Male   | 15-49 years      | 0.74 | 0.71 | 0.77 | 0 |
| 50 | Japan            | Male   | 50-69 years      | 0.61 | 0.59 | 0.62 | 0 |
| 51 | Japan            | Male   | 70+ years        | 0.25 | 0.22 | 0.29 | 0 |
| 52 | Japan            | Male   | Age-standardized | 0.5  | 0.47 | 0.53 | 0 |
| 53 | Japan            | Female | All Ages         | 1.8  | 1.69 | 1.91 | 0 |
| 54 | Japan            | Female | 15-49 years      | 1.05 | 1.01 | 1.09 | 0 |
| 55 | Japan            | Female | 50-69 years      | 0.96 | 0.9  | 1.02 | 0 |
| 56 | Japan            | Female | 70+ years        | 0.68 | 0.61 | 0.75 | 0 |
| 57 | Japan            | Female | Age-standardized | 0.84 | 0.79 | 0.9  | 0 |

|    |                 |        |                  |      |      |      |   |
|----|-----------------|--------|------------------|------|------|------|---|
| 1  |                 |        |                  |      |      |      |   |
| 2  | Japan           | Both   | All Ages         | 1.39 | 1.3  | 1.47 | 0 |
| 3  | Japan           | Both   | 15-49 years      | 0.83 | 0.79 | 0.86 | 0 |
| 4  | Japan           | Both   | 50-69 years      | 0.75 | 0.73 | 0.78 | 0 |
| 5  | Japan           | Both   | 70+ years        | 0.54 | 0.49 | 0.59 | 0 |
| 6  | Singapore       | Both   | Age-standardized | 1.02 | 0.92 | 1.12 | 0 |
| 7  | Switzerland     | Male   | All Ages         | 1.38 | 1.29 | 1.47 | 0 |
| 8  | Switzerland     | Male   | 15-49 years      | 1.13 | 1.02 | 1.24 | 0 |
| 9  | Switzerland     | Male   | 50-69 years      | 1.02 | 0.93 | 1.11 | 0 |
| 10 | Switzerland     | Male   | 70+ years        | 0.76 | 0.69 | 0.83 | 0 |
| 11 | Switzerland     | Male   | Age-standardized | 1.03 | 0.94 | 1.12 | 0 |
| 12 | Switzerland     | Female | All Ages         | 1.41 | 1.33 | 1.49 | 0 |
| 13 | Switzerland     | Female | 15-49 years      | 1.21 | 1.12 | 1.3  | 0 |
| 14 | Switzerland     | Female | 50-69 years      | 1.12 | 1.04 | 1.21 | 0 |
| 15 | Switzerland     | Female | 70+ years        | 0.98 | 0.9  | 1.06 | 0 |
| 16 | Switzerland     | Female | Age-standardized | 1.12 | 1.04 | 1.21 | 0 |
| 17 | Switzerland     | Both   | All Ages         | 1.4  | 1.32 | 1.48 | 0 |
| 18 | Switzerland     | Both   | 15-49 years      | 1.13 | 1.04 | 1.22 | 0 |
| 19 | Switzerland     | Both   | 50-69 years      | 1.12 | 1.03 | 1.21 | 0 |
| 20 | Switzerland     | Both   | 70+ years        | 1    | 0.94 | 1.06 | 0 |
| 21 | Switzerland     | Both   | Age-standardized | 1.01 | 0.91 | 1.1  | 0 |
| 22 | Dominica        | Both   | Age-standardized | 1.01 | 0.91 | 1.1  | 0 |
| 23 | Qatar           | Male   | All Ages         | 1.75 | 1.68 | 1.81 | 0 |
| 24 | Qatar           | Male   | 15-49 years      | 1.05 | 1.01 | 1.1  | 0 |
| 25 | Qatar           | Male   | 50-69 years      | 0.94 | 0.92 | 0.97 | 0 |
| 26 | Qatar           | Male   | 70+ years        | 0.72 | 0.71 | 0.74 | 0 |
| 27 | Qatar           | Male   | Age-standardized | 0.99 | 0.97 | 1.01 | 0 |
| 28 | Qatar           | Female | All Ages         | 2.04 | 1.98 | 2.09 | 0 |
| 29 | Qatar           | Female | 15-49 years      | 1.15 | 1.1  | 1.19 | 0 |
| 30 | Qatar           | Female | 50-69 years      | 0.95 | 0.92 | 0.98 | 0 |
| 31 | Qatar           | Female | 70+ years        | 0.85 | 0.82 | 0.89 | 0 |
| 32 | Qatar           | Female | Age-standardized | 0.94 | 0.91 | 0.98 | 0 |
| 33 | Qatar           | Both   | All Ages         | 2.06 | 1.96 | 2.16 | 0 |
| 34 | Qatar           | Both   | 15-49 years      | 1.22 | 1.2  | 1.24 | 0 |
| 35 | Qatar           | Both   | 50-69 years      | 1.01 | 0.99 | 1.04 | 0 |
| 36 | Qatar           | Both   | 70+ years        | 0.83 | 0.8  | 0.87 | 0 |
| 37 | Qatar           | Both   | Age-standardized | 1.01 | 0.95 | 1.07 | 0 |
| 38 | Bermuda         | Both   | Age-standardized | 1.01 | 0.95 | 1.07 | 0 |
| 39 | Haiti           | Male   | All Ages         | 1.6  | 1.55 | 1.65 | 0 |
| 40 | Haiti           | Male   | 15-49 years      | 1.17 | 1.13 | 1.21 | 0 |
| 41 | Haiti           | Male   | 50-69 years      | 1.04 | 0.99 | 1.09 | 0 |
| 42 | Haiti           | Male   | 70+ years        | 0.91 | 0.85 | 0.98 | 0 |
| 43 | Haiti           | Male   | Age-standardized | 1.07 | 1.03 | 1.11 | 0 |
| 44 | Haiti           | Female | All Ages         | 2.04 | 1.98 | 2.1  | 0 |
| 45 | Haiti           | Female | 15-49 years      | 1.51 | 1.47 | 1.56 | 0 |
| 46 | Haiti           | Female | 50-69 years      | 1.21 | 1.16 | 1.27 | 0 |
| 47 | Haiti           | Female | 70+ years        | 1.22 | 1.15 | 1.29 | 0 |
| 48 | Haiti           | Female | Age-standardized | 1.3  | 1.25 | 1.36 | 0 |
| 49 | Haiti           | Both   | All Ages         | 1.79 | 1.73 | 1.84 | 0 |
| 50 | Haiti           | Both   | 15-49 years      | 1.31 | 1.27 | 1.35 | 0 |
| 51 | Haiti           | Both   | 50-69 years      | 1.08 | 1.03 | 1.13 | 0 |
| 52 | Haiti           | Both   | 70+ years        | 1.03 | 0.95 | 1.1  | 0 |
| 53 | Haiti           | Both   | Age-standardized | 1    | 0.93 | 1.07 | 0 |
| 54 | Solomon Islands | Both   | Age-standardized | 1    | 0.93 | 1.07 | 0 |
| 55 | Peru            | Male   | All Ages         | 2.4  | 2.34 | 2.45 | 0 |
| 56 | Peru            | Male   | 15-49 years      | 1.73 | 1.68 | 1.79 | 0 |
| 57 | Peru            | Male   | 50-69 years      | 1.28 | 1.23 | 1.33 | 0 |
| 58 | Peru            | Male   | 70+ years        | 1.03 | 0.97 | 1.08 | 0 |
| 59 | Peru            | Male   | Age-standardized | 1.35 | 1.29 | 1.4  | 0 |
| 60 | Peru            | Female | All Ages         | 2.26 | 2.2  | 2.33 | 0 |

|    |             |        |                  |       |       |       |       |
|----|-------------|--------|------------------|-------|-------|-------|-------|
| 1  |             |        |                  |       |       |       |       |
| 2  | Peru        | Female | 15-49 years      | 1.44  | 1.42  | 1.47  | 0     |
| 3  | Peru        | Female | 50-69 years      | 1.04  | 1     | 1.09  | 0     |
| 4  | Peru        | Female | 70+ years        | 1.1   | 1.04  | 1.17  | 0     |
| 5  | Peru        | Female | Age-standardized | 1.13  | 1.09  | 1.16  | 0     |
| 6  | Peru        | Both   | All Ages         | 2.36  | 2.31  | 2.42  | 0     |
| 7  | Peru        | Both   | 15-49 years      | 1.66  | 1.62  | 1.7   | 0     |
| 8  | Peru        | Both   | 50-69 years      | 1.18  | 1.14  | 1.23  | 0     |
| 9  | Peru        | Both   | 70+ years        | 1.08  | 1.04  | 1.12  | 0     |
| 10 | Vietnam     | Both   | Age-standardized | 1     | 0.96  | 1.04  | 0     |
| 11 | South Sudan | Male   | All Ages         | 0.14  | 0.06  | 0.21  | 0.001 |
| 12 | South Sudan | Male   | 15-49 years      | 0.61  | 0.6   | 0.63  | 0     |
| 13 | South Sudan | Male   | 50-69 years      | 0.49  | 0.45  | 0.53  | 0     |
| 14 | South Sudan | Male   | 70+ years        | 0.53  | 0.49  | 0.56  | 0     |
| 15 | South Sudan | Male   | Age-standardized | 0.55  | 0.51  | 0.59  | 0     |
| 16 | South Sudan | Female | All Ages         | 0.17  | 0.1   | 0.24  | 0     |
| 17 | South Sudan | Female | 15-49 years      | 0.33  | 0.3   | 0.37  | 0     |
| 18 | South Sudan | Female | 50-69 years      | 0.1   | 0.07  | 0.14  | 0     |
| 19 | South Sudan | Female | 70+ years        | 0.25  | 0.21  | 0.29  | 0     |
| 20 | South Sudan | Female | Age-standardized | 0.18  | 0.15  | 0.2   | 0     |
| 21 | South Sudan | Both   | All Ages         | 0.11  | 0.04  | 0.19  | 0.003 |
| 22 | South Sudan | Both   | 15-49 years      | 0.44  | 0.41  | 0.46  | 0     |
| 23 | South Sudan | Both   | 50-69 years      | 0.27  | 0.23  | 0.31  | 0     |
| 24 | South Sudan | Both   | 70+ years        | 0.48  | 0.47  | 0.48  | 0     |
| 25 | Turkey      | Both   | Age-standardized | 1     | 0.94  | 1.07  | 0     |
| 26 | Luxembourg  | Male   | All Ages         | 1.28  | 1.2   | 1.35  | 0     |
| 27 | Luxembourg  | Male   | 15-49 years      | 1.16  | 1.03  | 1.3   | 0     |
| 28 | Luxembourg  | Male   | 50-69 years      | 1.03  | 0.92  | 1.14  | 0     |
| 29 | Luxembourg  | Male   | 70+ years        | 0.8   | 0.7   | 0.9   | 0     |
| 30 | Luxembourg  | Male   | Age-standardized | 1.07  | 0.96  | 1.17  | 0     |
| 31 | Luxembourg  | Female | All Ages         | 1.41  | 1.31  | 1.51  | 0     |
| 32 | Luxembourg  | Female | 15-49 years      | 1.38  | 1.23  | 1.53  | 0     |
| 33 | Luxembourg  | Female | 50-69 years      | 1.27  | 1.15  | 1.39  | 0     |
| 34 | Luxembourg  | Female | 70+ years        | 1.26  | 1.14  | 1.39  | 0     |
| 35 | Luxembourg  | Female | Age-standardized | 1.32  | 1.21  | 1.44  | 0     |
| 36 | Luxembourg  | Both   | All Ages         | 1.35  | 1.27  | 1.43  | 0     |
| 37 | Luxembourg  | Both   | 15-49 years      | 1.22  | 1.09  | 1.35  | 0     |
| 38 | Luxembourg  | Both   | 50-69 years      | 1.19  | 1.07  | 1.31  | 0     |
| 39 | Luxembourg  | Both   | 70+ years        | 1.2   | 1.09  | 1.3   | 0     |
| 40 | Belize      | Both   | Age-standardized | 1     | 0.9   | 1.11  | 0     |
| 41 | Burundi     | Male   | All Ages         | 0.68  | 0.64  | 0.72  | 0     |
| 42 | Burundi     | Male   | 15-49 years      | 0.33  | 0.26  | 0.4   | 0     |
| 43 | Burundi     | Male   | 50-69 years      | 0.3   | 0.27  | 0.33  | 0     |
| 44 | Burundi     | Male   | 70+ years        | 0.37  | 0.35  | 0.4   | 0     |
| 45 | Burundi     | Male   | Age-standardized | 0.36  | 0.35  | 0.38  | 0     |
| 46 | Burundi     | Female | All Ages         | -0.09 | -0.19 | 0.02  | 0.094 |
| 47 | Burundi     | Female | 15-49 years      | -0.15 | -0.26 | -0.04 | 0.011 |
| 48 | Burundi     | Female | 50-69 years      | -0.05 | -0.11 | 0.01  | 0.127 |
| 49 | Burundi     | Female | 70+ years        | 0.13  | 0.08  | 0.18  | 0     |
| 50 | Burundi     | Female | Age-standardized | 0.05  | 0.01  | 0.1   | 0.023 |
| 51 | Burundi     | Both   | All Ages         | 0.41  | 0.34  | 0.47  | 0     |
| 52 | Burundi     | Both   | 15-49 years      | 0.18  | 0.09  | 0.26  | 0     |
| 53 | Burundi     | Both   | 50-69 years      | 0.32  | 0.29  | 0.35  | 0     |
| 54 | Burundi     | Both   | 70+ years        | 0.38  | 0.33  | 0.42  | 0     |
| 55 | Estonia     | Both   | Age-standardized | 0.99  | 0.88  | 1.11  | 0     |
| 56 | New Zealand | Male   | All Ages         | 1.65  | 1.52  | 1.78  | 0     |
| 57 | New Zealand | Male   | 15-49 years      | 1.33  | 1.16  | 1.5   | 0     |

|    |              |        |                  |       |       |       |       |
|----|--------------|--------|------------------|-------|-------|-------|-------|
| 1  |              |        |                  |       |       |       |       |
| 2  | New Zealand  | Male   | 50-69 years      | 1.17  | 1.05  | 1.29  | 0     |
| 3  | New Zealand  | Male   | 70+ years        | 0.84  | 0.72  | 0.95  | 0     |
| 4  | New Zealand  | Male   | Age-standardized | 1.21  | 1.08  | 1.34  | 0     |
| 5  | New Zealand  | Female | All Ages         | 1.64  | 1.56  | 1.72  | 0     |
| 6  | New Zealand  | Female | 15-49 years      | 1.3   | 1.17  | 1.43  | 0     |
| 7  | New Zealand  | Female | 50-69 years      | 1.15  | 1.06  | 1.23  | 0     |
| 8  | New Zealand  | Female | 70+ years        | 0.99  | 0.89  | 1.08  | 0     |
| 9  | New Zealand  | Female | Age-standardized | 1.17  | 1.07  | 1.27  | 0     |
| 10 | New Zealand  | Both   | All Ages         | 1.63  | 1.52  | 1.74  | 0     |
| 11 | New Zealand  | Both   | 15-49 years      | 1.28  | 1.13  | 1.43  | 0     |
| 12 | New Zealand  | Both   | 50-69 years      | 1.12  | 1.01  | 1.23  | 0     |
| 13 | New Zealand  | Both   | 70+ years        | 1.05  | 0.94  | 1.16  | 0     |
| 14 | New Zealand  | Both   | Age-standardized | 0.99  | 0.95  | 1.03  | 0     |
| 15 | Namibia      | Both   | All Ages         | 1.01  | 0.94  | 1.08  | 0     |
| 16 | Slovakia     | Male   | 15-49 years      | 0.52  | 0.4   | 0.64  | 0     |
| 17 | Slovakia     | Male   | 50-69 years      | -0.22 | -0.37 | -0.07 | 0.005 |
| 18 | Slovakia     | Male   | 70+ years        | 0.04  | -0.03 | 0.12  | 0.248 |
| 19 | Slovakia     | Male   | Age-standardized | 0.13  | 0.05  | 0.2   | 0.002 |
| 20 | Slovakia     | Female | All Ages         | 1.44  | 1.37  | 1.52  | 0     |
| 21 | Slovakia     | Female | 15-49 years      | 0.68  | 0.58  | 0.79  | 0     |
| 22 | Slovakia     | Female | 50-69 years      | 0.46  | 0.3   | 0.62  | 0     |
| 23 | Slovakia     | Female | 70+ years        | 0.59  | 0.52  | 0.66  | 0     |
| 24 | Slovakia     | Female | Age-standardized | 0.53  | 0.45  | 0.6   | 0     |
| 25 | Slovakia     | Both   | All Ages         | 1.16  | 1.08  | 1.24  | 0     |
| 26 | Slovakia     | Both   | 15-49 years      | 0.59  | 0.47  | 0.71  | 0     |
| 27 | Slovakia     | Both   | 50-69 years      | 0.1   | -0.05 | 0.25  | 0.17  |
| 28 | Slovakia     | Both   | 70+ years        | 0.23  | 0.15  | 0.31  | 0     |
| 29 | Slovakia     | Both   | Age-standardized | 0.99  | 0.97  | 1.01  | 0     |
| 30 | Burkina Faso | Both   | All Ages         | 1.71  | 1.66  | 1.76  | 0     |
| 31 | Kenya        | Male   | 15-49 years      | 1.27  | 1.24  | 1.31  | 0     |
| 32 | Kenya        | Male   | 50-69 years      | 0.97  | 0.91  | 1.02  | 0     |
| 33 | Kenya        | Male   | 70+ years        | 1.03  | 0.97  | 1.09  | 0     |
| 34 | Kenya        | Male   | Age-standardized | 1.05  | 1.02  | 1.08  | 0     |
| 35 | Kenya        | Female | All Ages         | 0.94  | 0.88  | 1.01  | 0     |
| 36 | Kenya        | Female | 15-49 years      | 0.48  | 0.43  | 0.54  | 0     |
| 37 | Kenya        | Female | 50-69 years      | 0.1   | 0.05  | 0.16  | 0.001 |
| 38 | Kenya        | Female | 70+ years        | 0.24  | 0.18  | 0.3   | 0     |
| 39 | Kenya        | Female | Age-standardized | 0.22  | 0.18  | 0.27  | 0     |
| 40 | Kenya        | Both   | All Ages         | 1.44  | 1.38  | 1.5   | 0     |
| 41 | Kenya        | Both   | 15-49 years      | 1     | 0.96  | 1.04  | 0     |
| 42 | Kenya        | Both   | 50-69 years      | 0.67  | 0.62  | 0.73  | 0     |
| 43 | Kenya        | Both   | 70+ years        | 0.49  | 0.42  | 0.57  | 0     |
| 44 | Kenya        | Both   | Age-standardized | 0.97  | 0.96  | 0.99  | 0     |
| 45 | Argentina    | Male   | All Ages         | 1.58  | 1.52  | 1.64  | 0     |
| 46 | Fiji         | Male   | 15-49 years      | 0.89  | 0.78  | 1     | 0     |
| 47 | Fiji         | Male   | 50-69 years      | 0.59  | 0.49  | 0.69  | 0     |
| 48 | Fiji         | Male   | 70+ years        | 0.49  | 0.39  | 0.59  | 0     |
| 49 | Fiji         | Male   | Age-standardized | 0.62  | 0.51  | 0.73  | 0     |
| 50 | Fiji         | Female | All Ages         | 1.95  | 1.93  | 1.98  | 0     |
| 51 | Fiji         | Female | 15-49 years      | 1.2   | 1.16  | 1.23  | 0     |
| 52 | Fiji         | Female | 50-69 years      | 1.03  | 0.99  | 1.07  | 0     |
| 53 | Fiji         | Female | 70+ years        | 0.88  | 0.85  | 0.9   | 0     |
| 54 | Fiji         | Female | Age-standardized | 0.98  | 0.94  | 1.01  | 0     |
| 55 | Fiji         | Both   | All Ages         | 1.75  | 1.72  | 1.78  | 0     |
| 56 | Fiji         | Both   | 15-49 years      | 1.03  | 0.96  | 1.1   | 0     |
| 57 | Fiji         | Both   | 50-69 years      | 0.8   | 0.73  | 0.87  | 0     |
| 58 | Fiji         | Both   | Age-standardized | 0.98  | 0.94  | 1.01  | 0     |
| 59 | Fiji         | Both   | All Ages         | 1.75  | 1.72  | 1.78  | 0     |
| 60 | Fiji         | Both   | 15-49 years      | 1.03  | 0.96  | 1.1   | 0     |
| 61 | Fiji         | Both   | 50-69 years      | 0.8   | 0.73  | 0.87  | 0     |

|    |                        |        |                  |      |      |      |   |
|----|------------------------|--------|------------------|------|------|------|---|
| 1  |                        |        |                  |      |      |      |   |
| 2  | Fiji                   | Both   | 70+ years        | 0.65 | 0.59 | 0.71 | 0 |
| 3  | Kuwait                 | Both   | Age-standardized | 0.96 | 0.92 | 0.99 | 0 |
| 4  | Bosnia and Herzegovina | Male   | All Ages         | 2.12 | 1.94 | 2.29 | 0 |
| 5  | Bosnia and Herzegovina | Male   | 15-49 years      | 1.34 | 1.23 | 1.45 | 0 |
| 6  | Bosnia and Herzegovina | Male   | 50-69 years      | 0.79 | 0.57 | 1.01 | 0 |
| 7  | Bosnia and Herzegovina | Male   | 70+ years        | 1.17 | 0.93 | 1.41 | 0 |
| 8  | Bosnia and Herzegovina | Male   | Age-standardized | 1.04 | 0.91 | 1.17 | 0 |
| 9  | Bosnia and Herzegovina | Female | All Ages         | 2.47 | 2.33 | 2.62 | 0 |
| 10 | Bosnia and Herzegovina | Female | 15-49 years      | 1.57 | 1.45 | 1.7  | 0 |
| 11 | Bosnia and Herzegovina | Female | 50-69 years      | 1.4  | 1.24 | 1.56 | 0 |
| 12 | Bosnia and Herzegovina | Female | 70+ years        | 1.66 | 1.48 | 1.83 | 0 |
| 13 | Bosnia and Herzegovina | Female | Age-standardized | 1.45 | 1.32 | 1.58 | 0 |
| 14 | Bosnia and Herzegovina | Both   | All Ages         | 2.27 | 2.11 | 2.43 | 0 |
| 15 | Bosnia and Herzegovina | Both   | 15-49 years      | 1.43 | 1.32 | 1.54 | 0 |
| 16 | Bosnia and Herzegovina | Both   | 50-69 years      | 1.08 | 0.89 | 1.27 | 0 |
| 17 | Bosnia and Herzegovina | Both   | 70+ years        | 1.5  | 1.28 | 1.72 | 0 |
| 18 | Bosnia and Herzegovina | Both   | Age-standardized | 0.95 | 0.89 | 1.01 | 0 |
| 19 | Laos                   | Both   | Age-standardized | 0.95 | 0.89 | 1.01 | 0 |
| 20 | Sweden                 | Male   | All Ages         | 1.24 | 1.14 | 1.35 | 0 |
| 21 | Sweden                 | Male   | 15-49 years      | 1.1  | 0.98 | 1.21 | 0 |
| 22 | Sweden                 | Male   | 50-69 years      | 1.08 | 0.99 | 1.17 | 0 |
| 23 | Sweden                 | Male   | 70+ years        | 0.77 | 0.7  | 0.84 | 0 |
| 24 | Sweden                 | Male   | Age-standardized | 1.08 | 0.98 | 1.19 | 0 |
| 25 | Sweden                 | Female | All Ages         | 1.4  | 1.29 | 1.52 | 0 |
| 26 | Sweden                 | Female | 15-49 years      | 1.32 | 1.21 | 1.44 | 0 |
| 27 | Sweden                 | Female | 50-69 years      | 1.32 | 1.23 | 1.42 | 0 |
| 28 | Sweden                 | Female | 70+ years        | 1.14 | 1.04 | 1.23 | 0 |
| 29 | Sweden                 | Female | Age-standardized | 1.32 | 1.21 | 1.43 | 0 |
| 30 | Sweden                 | Both   | All Ages         | 1.32 | 1.21 | 1.42 | 0 |
| 31 | Sweden                 | Both   | 15-49 years      | 1.17 | 1.05 | 1.28 | 0 |
| 32 | Sweden                 | Both   | 50-69 years      | 1.19 | 1.1  | 1.29 | 0 |
| 33 | Sweden                 | Both   | 70+ years        | 1.02 | 0.96 | 1.09 | 0 |
| 34 | Sweden                 | Both   | Age-standardized | 0.94 | 0.91 | 0.97 | 0 |
| 35 | Pakistan               | Both   | Age-standardized | 0.94 | 0.91 | 0.97 | 0 |
| 36 | Antigua and Barbuda    | Male   | All Ages         | 1.89 | 1.81 | 1.97 | 0 |
| 37 | Antigua and Barbuda    | Male   | 15-49 years      | 1.39 | 1.33 | 1.46 | 0 |
| 38 | Antigua and Barbuda    | Male   | 50-69 years      | 0.93 | 0.89 | 0.97 | 0 |
| 39 | Antigua and Barbuda    | Male   | 70+ years        | 0.68 | 0.65 | 0.71 | 0 |
| 40 | Antigua and Barbuda    | Male   | Age-standardized | 1.02 | 0.98 | 1.06 | 0 |
| 41 | Antigua and Barbuda    | Female | All Ages         | 1.89 | 1.76 | 2.01 | 0 |
| 42 | Antigua and Barbuda    | Female | 15-49 years      | 1.44 | 1.38 | 1.5  | 0 |
| 43 | Antigua and Barbuda    | Female | 50-69 years      | 0.94 | 0.86 | 1.03 | 0 |
| 44 | Antigua and Barbuda    | Female | 70+ years        | 0.91 | 0.84 | 0.97 | 0 |
| 45 | Antigua and Barbuda    | Female | Age-standardized | 1.05 | 0.98 | 1.12 | 0 |
| 46 | Antigua and Barbuda    | Both   | All Ages         | 1.9  | 1.79 | 2.01 | 0 |
| 47 | Antigua and Barbuda    | Both   | 15-49 years      | 1.42 | 1.37 | 1.47 | 0 |
| 48 | Antigua and Barbuda    | Both   | 50-69 years      | 0.96 | 0.9  | 1.02 | 0 |
| 49 | Antigua and Barbuda    | Both   | 70+ years        | 0.83 | 0.78 | 0.87 | 0 |
| 50 | Antigua and Barbuda    | Both   | Age-standardized | 0.93 | 0.86 | 1.01 | 0 |
| 51 | Armenia                | Both   | Age-standardized | 0.93 | 0.86 | 1.01 | 0 |
| 52 | Low SDI                | Male   | All Ages         | 1.18 | 1.09 | 1.27 | 0 |
| 53 | Low SDI                | Male   | 15-49 years      | 0.9  | 0.87 | 0.94 | 0 |
| 54 | Low SDI                | Male   | 50-69 years      | 0.73 | 0.68 | 0.77 | 0 |
| 55 | Low SDI                | Male   | 70+ years        | 0.74 | 0.69 | 0.79 | 0 |
| 56 | Low SDI                | Male   | Age-standardized | 0.82 | 0.78 | 0.86 | 0 |
| 57 | Low SDI                | Female | All Ages         | 1.13 | 1.03 | 1.23 | 0 |
| 58 | Low SDI                | Female | 15-49 years      | 0.78 | 0.72 | 0.84 | 0 |
| 59 | Low SDI                | Female | 50-69 years      | 0.61 | 0.56 | 0.67 | 0 |
| 60 | Low SDI                | Female | 70+ years        | 0.72 | 0.67 | 0.78 | 0 |



|    |           |        |                  |      |      |      |       |
|----|-----------|--------|------------------|------|------|------|-------|
| 1  |           |        |                  |      |      |      |       |
| 2  | Low SDI   | Female | Age-standardized | 0.69 | 0.64 | 0.75 | 0     |
| 3  | Low SDI   | Both   | All Ages         | 1.15 | 1.06 | 1.24 | 0     |
| 4  | Low SDI   | Both   | 15-49 years      | 0.85 | 0.8  | 0.89 | 0     |
| 5  | Low SDI   | Both   | 50-69 years      | 0.64 | 0.59 | 0.69 | 0     |
| 6  | Low SDI   | Both   | 70+ years        | 0.66 | 0.62 | 0.7  | 0     |
| 7  | Low SDI   | Both   | Age-standardized | 0.74 | 0.7  | 0.79 | 0     |
| 8  | Zambia    | Male   | All Ages         | 0.84 | 0.74 | 0.95 | 0     |
| 9  | Zambia    | Male   | 15-49 years      | 0.85 | 0.82 | 0.88 | 0     |
| 10 | Zambia    | Male   | 50-69 years      | 0.56 | 0.53 | 0.59 | 0     |
| 11 | Zambia    | Male   | 70+ years        | 0.59 | 0.55 | 0.63 | 0     |
| 12 | Zambia    | Male   | Age-standardized | 0.63 | 0.6  | 0.65 | 0     |
| 13 | Zambia    | Female | All Ages         | 0.37 | 0.26 | 0.49 | 0     |
| 14 | Zambia    | Female | 15-49 years      | 0.26 | 0.21 | 0.32 | 0     |
| 15 | Zambia    | Female | 50-69 years      | 0.05 | 0.01 | 0.1  | 0.027 |
| 16 | Zambia    | Female | 70+ years        | 0.18 | 0.14 | 0.22 | 0     |
| 17 | Zambia    | Female | Age-standardized | 0.12 | 0.07 | 0.16 | 0     |
| 18 | Zambia    | Both   | All Ages         | 0.66 | 0.55 | 0.77 | 0     |
| 19 | Zambia    | Both   | 15-49 years      | 0.63 | 0.59 | 0.67 | 0     |
| 20 | Zambia    | Both   | 50-69 years      | 0.32 | 0.28 | 0.37 | 0     |
| 21 | Zambia    | Both   | 70+ years        | 0.2  | 0.18 | 0.23 | 0     |
| 22 | Zambia    | Both   | Age-standardized | 0.93 | 0.91 | 0.95 | 0     |
| 23 | Vanuatu   | Both   | All Ages         | 1.25 | 1.13 | 1.38 | 0     |
| 24 | Denmark   | Male   | 15-49 years      | 1.13 | 0.92 | 1.34 | 0     |
| 25 | Denmark   | Male   | 50-69 years      | 1.08 | 0.94 | 1.21 | 0     |
| 26 | Denmark   | Male   | 70+ years        | 0.82 | 0.71 | 0.93 | 0     |
| 27 | Denmark   | Male   | Age-standardized | 1.08 | 0.93 | 1.23 | 0     |
| 28 | Denmark   | Female | All Ages         | 1.33 | 1.19 | 1.46 | 0     |
| 29 | Denmark   | Female | 15-49 years      | 1.26 | 1.04 | 1.47 | 0     |
| 30 | Denmark   | Female | 50-69 years      | 1.25 | 1.1  | 1.4  | 0     |
| 31 | Denmark   | Female | 70+ years        | 1.03 | 0.89 | 1.16 | 0     |
| 32 | Denmark   | Female | Age-standardized | 1.22 | 1.06 | 1.38 | 0     |
| 33 | Denmark   | Both   | All Ages         | 1.29 | 1.16 | 1.42 | 0     |
| 34 | Denmark   | Both   | 15-49 years      | 1.14 | 0.93 | 1.35 | 0     |
| 35 | Denmark   | Both   | 50-69 years      | 1.17 | 1.02 | 1.32 | 0     |
| 36 | Denmark   | Both   | 70+ years        | 1.07 | 0.98 | 1.17 | 0     |
| 37 | Denmark   | Both   | Age-standardized | 0.92 | 0.82 | 1.03 | 0     |
| 38 | Palestine | Both   | All Ages         | 2.17 | 2.06 | 2.28 | 0     |
| 39 | Jamaica   | Male   | 15-49 years      | 1.48 | 1.33 | 1.63 | 0     |
| 40 | Jamaica   | Male   | 50-69 years      | 1.07 | 0.97 | 1.17 | 0     |
| 41 | Jamaica   | Male   | 70+ years        | 0.83 | 0.74 | 0.93 | 0     |
| 42 | Jamaica   | Male   | Age-standardized | 1.15 | 1.04 | 1.27 | 0     |
| 43 | Jamaica   | Female | All Ages         | 2.12 | 2.01 | 2.23 | 0     |
| 44 | Jamaica   | Female | 15-49 years      | 1.49 | 1.33 | 1.64 | 0     |
| 45 | Jamaica   | Female | 50-69 years      | 1.07 | 0.95 | 1.18 | 0     |
| 46 | Jamaica   | Female | 70+ years        | 0.97 | 0.85 | 1.09 | 0     |
| 47 | Jamaica   | Female | Age-standardized | 1.15 | 1.03 | 1.28 | 0     |
| 48 | Jamaica   | Both   | All Ages         | 2.16 | 2.04 | 2.27 | 0     |
| 49 | Jamaica   | Both   | 15-49 years      | 1.5  | 1.35 | 1.65 | 0     |
| 50 | Jamaica   | Both   | 50-69 years      | 1.09 | 0.98 | 1.2  | 0     |
| 51 | Jamaica   | Both   | 70+ years        | 0.92 | 0.8  | 1.03 | 0     |
| 52 | Jamaica   | Both   | Age-standardized | 0.91 | 0.87 | 0.96 | 0     |
| 53 | Samoa     | Both   | All Ages         | 2.25 | 2.15 | 2.35 | 0     |
| 54 | Syria     | Male   | 15-49 years      | 1.68 | 1.6  | 1.76 | 0     |
| 55 | Syria     | Male   | 50-69 years      | 1.08 | 1.07 | 1.1  | 0     |
| 56 | Syria     | Male   | 70+ years        | 0.99 | 0.94 | 1.03 | 0     |
| 57 | Syria     | Male   | Age-standardized | 1.14 | 1.12 | 1.16 | 0     |



|    |                  |        |                  |      |      |      |   |
|----|------------------|--------|------------------|------|------|------|---|
| 1  |                  |        |                  |      |      |      |   |
| 2  | Syria            | Female | All Ages         | 2.31 | 2.22 | 2.39 | 0 |
| 3  | Syria            | Female | 15-49 years      | 1.7  | 1.61 | 1.78 | 0 |
| 4  | Syria            | Female | 50-69 years      | 1.18 | 1.15 | 1.21 | 0 |
| 5  | Syria            | Female | 70+ years        | 1.09 | 1.05 | 1.13 | 0 |
| 6  | Syria            | Female | Age-standardized | 1.2  | 1.17 | 1.23 | 0 |
| 7  | Syria            | Both   | All Ages         | 2.27 | 2.18 | 2.37 | 0 |
| 8  | Syria            | Both   | 15-49 years      | 1.69 | 1.61 | 1.76 | 0 |
| 9  | Syria            | Both   | 50-69 years      | 1.13 | 1.12 | 1.15 | 0 |
| 10 | Syria            | Both   | 70+ years        | 0.98 | 0.93 | 1.03 | 0 |
| 11 | Tonga            | Both   | Age-standardized | 0.91 | 0.87 | 0.94 | 0 |
| 12 | Iraq             | Male   | All Ages         | 1.44 | 1.36 | 1.52 | 0 |
| 13 | Iraq             | Male   | 15-49 years      | 0.95 | 0.9  | 1.01 | 0 |
| 14 | Iraq             | Male   | 50-69 years      | 0.66 | 0.62 | 0.7  | 0 |
| 15 | Iraq             | Male   | 70+ years        | 0.54 | 0.51 | 0.57 | 0 |
| 16 | Iraq             | Male   | Age-standardized | 0.68 | 0.64 | 0.72 | 0 |
| 17 | Iraq             | Female | All Ages         | 1.15 | 1.02 | 1.28 | 0 |
| 18 | Iraq             | Female | 15-49 years      | 0.67 | 0.59 | 0.76 | 0 |
| 19 | Iraq             | Female | 50-69 years      | 0.44 | 0.37 | 0.52 | 0 |
| 20 | Iraq             | Female | 70+ years        | 0.34 | 0.28 | 0.4  | 0 |
| 21 | Iraq             | Female | Age-standardized | 0.43 | 0.35 | 0.51 | 0 |
| 22 | Iraq             | Both   | All Ages         | 1.33 | 1.24 | 1.43 | 0 |
| 23 | Iraq             | Both   | 15-49 years      | 0.85 | 0.78 | 0.91 | 0 |
| 24 | Iraq             | Both   | 50-69 years      | 0.59 | 0.54 | 0.63 | 0 |
| 25 | Iraq             | Both   | 70+ years        | 0.5  | 0.46 | 0.54 | 0 |
| 26 | Iraq             | Both   | Age-standardized | 0.9  | 0.81 | 0.99 | 0 |
| 27 | Afghanistan      | Both   | All Ages         | 1.45 | 1.42 | 1.48 | 0 |
| 28 | American Samoa   | Male   | 15-49 years      | 0.93 | 0.86 | 0.99 | 0 |
| 29 | American Samoa   | Male   | 50-69 years      | 0.67 | 0.65 | 0.68 | 0 |
| 30 | American Samoa   | Male   | 70+ years        | 0.55 | 0.53 | 0.56 | 0 |
| 31 | American Samoa   | Male   | Age-standardized | 0.74 | 0.72 | 0.75 | 0 |
| 32 | American Samoa   | Female | All Ages         | 1.78 | 1.76 | 1.8  | 0 |
| 33 | American Samoa   | Female | 15-49 years      | 1.11 | 1    | 1.23 | 0 |
| 34 | American Samoa   | Female | 50-69 years      | 0.93 | 0.91 | 0.95 | 0 |
| 35 | American Samoa   | Female | 70+ years        | 0.75 | 0.72 | 0.78 | 0 |
| 36 | American Samoa   | Female | Age-standardized | 0.96 | 0.93 | 0.99 | 0 |
| 37 | American Samoa   | Both   | All Ages         | 1.61 | 1.59 | 1.63 | 0 |
| 38 | American Samoa   | Both   | 15-49 years      | 1.01 | 0.93 | 1.1  | 0 |
| 39 | American Samoa   | Both   | 50-69 years      | 0.8  | 0.78 | 0.81 | 0 |
| 40 | American Samoa   | Both   | 70+ years        | 0.66 | 0.64 | 0.67 | 0 |
| 41 | American Samoa   | Both   | Age-standardized | 0.89 | 0.86 | 0.93 | 0 |
| 42 | Poland           | Both   | All Ages         | 1.35 | 1.33 | 1.38 | 0 |
| 43 | Argentina        | Male   | 15-49 years      | 1.06 | 1.04 | 1.08 | 0 |
| 44 | Argentina        | Male   | 50-69 years      | 0.89 | 0.87 | 0.92 | 0 |
| 45 | Argentina        | Male   | 70+ years        | 0.59 | 0.57 | 0.61 | 0 |
| 46 | Argentina        | Male   | Age-standardized | 0.91 | 0.89 | 0.94 | 0 |
| 47 | Argentina        | Female | All Ages         | 1.52 | 1.5  | 1.55 | 0 |
| 48 | Argentina        | Female | 15-49 years      | 1.15 | 1.11 | 1.19 | 0 |
| 49 | Argentina        | Female | 50-69 years      | 1.08 | 1.06 | 1.1  | 0 |
| 50 | Argentina        | Female | 70+ years        | 0.98 | 0.95 | 1    | 0 |
| 51 | Argentina        | Female | Age-standardized | 1.07 | 1.05 | 1.08 | 0 |
| 52 | Argentina        | Both   | All Ages         | 1.41 | 1.38 | 1.43 | 0 |
| 53 | Argentina        | Both   | 15-49 years      | 1.09 | 1.06 | 1.11 | 0 |
| 54 | Argentina        | Both   | 50-69 years      | 0.97 | 0.95 | 0.99 | 0 |
| 55 | Argentina        | Both   | 70+ years        | 0.74 | 0.73 | 0.76 | 0 |
| 56 | Argentina        | Both   | Age-standardized | 0.89 | 0.86 | 0.92 | 0 |
| 57 | Marshall Islands | Both   | All Ages         | 1.79 | 1.68 | 1.9  | 0 |
| 58 | United States    | Male   | All Ages         |      |      |      |   |

|    |               |        |                  |      |      |      |   |
|----|---------------|--------|------------------|------|------|------|---|
| 1  |               |        |                  |      |      |      |   |
| 2  | United States | Male   | 15-49 years      | 1.47 | 1.31 | 1.62 | 0 |
| 3  | United States | Male   | 50-69 years      | 1.34 | 1.23 | 1.44 | 0 |
| 4  | United States | Male   | 70+ years        | 1.01 | 0.91 | 1.1  | 0 |
| 5  | United States | Male   | Age-standardized | 1.4  | 1.27 | 1.53 | 0 |
| 6  | United States | Female | All Ages         | 1.24 | 1.17 | 1.31 | 0 |
| 7  | United States | Female | 15-49 years      | 0.99 | 0.85 | 1.14 | 0 |
| 8  | United States | Female | 50-69 years      | 0.78 | 0.74 | 0.83 | 0 |
| 9  | United States | Female | 70+ years        | 0.74 | 0.62 | 0.86 | 0 |
| 10 | United States | Female | Age-standardized | 0.93 | 0.82 | 1.05 | 0 |
| 11 | United States | Both   | All Ages         | 1.56 | 1.46 | 1.65 | 0 |
| 12 | United States | Both   | 15-49 years      | 1.29 | 1.14 | 1.44 | 0 |
| 13 | United States | Both   | 50-69 years      | 1.11 | 1.03 | 1.19 | 0 |
| 14 | United States | Both   | 70+ years        | 0.88 | 0.78 | 0.99 | 0 |
| 15 | United States | Both   | Age-standardized | 0.89 | 0.87 | 0.91 | 0 |
| 16 | Tunisia       | Both   | Age-standardized | 0.89 | 0.87 | 0.91 | 0 |
| 17 | Pakistan      | Male   | All Ages         | 1.33 | 1.24 | 1.42 | 0 |
| 18 | Pakistan      | Male   | 15-49 years      | 1.06 | 1.02 | 1.09 | 0 |
| 19 | Pakistan      | Male   | 50-69 years      | 0.88 | 0.86 | 0.91 | 0 |
| 20 | Pakistan      | Male   | 70+ years        | 0.98 | 0.94 | 1.02 | 0 |
| 21 | Pakistan      | Male   | Age-standardized | 0.94 | 0.91 | 0.97 | 0 |
| 22 | Pakistan      | Female | All Ages         | 1.56 | 1.45 | 1.68 | 0 |
| 23 | Pakistan      | Female | 15-49 years      | 1.13 | 1.08 | 1.18 | 0 |
| 24 | Pakistan      | Female | 50-69 years      | 0.99 | 0.94 | 1.04 | 0 |
| 25 | Pakistan      | Female | 70+ years        | 1.17 | 1.13 | 1.22 | 0 |
| 26 | Pakistan      | Female | Age-standardized | 1.03 | 0.99 | 1.07 | 0 |
| 27 | Pakistan      | Both   | All Ages         | 1.4  | 1.3  | 1.5  | 0 |
| 28 | Pakistan      | Both   | 15-49 years      | 1.06 | 1.02 | 1.09 | 0 |
| 29 | Pakistan      | Both   | 50-69 years      | 0.9  | 0.87 | 0.94 | 0 |
| 30 | Pakistan      | Both   | 70+ years        | 0.98 | 0.93 | 1.02 | 0 |
| 31 | Pakistan      | Both   | Age-standardized | 0.88 | 0.81 | 0.94 | 0 |
| 32 | China         | Both   | Age-standardized | 0.88 | 0.81 | 0.94 | 0 |
| 33 | South Africa  | Male   | All Ages         | 1.49 | 1.42 | 1.56 | 0 |
| 34 | South Africa  | Male   | 15-49 years      | 0.96 | 0.89 | 1.04 | 0 |
| 35 | South Africa  | Male   | 50-69 years      | 0.66 | 0.63 | 0.69 | 0 |
| 36 | South Africa  | Male   | 70+ years        | 0.59 | 0.56 | 0.62 | 0 |
| 37 | South Africa  | Male   | Age-standardized | 0.72 | 0.69 | 0.75 | 0 |
| 38 | South Africa  | Female | All Ages         | 1.38 | 1.33 | 1.43 | 0 |
| 39 | South Africa  | Female | 15-49 years      | 0.81 | 0.75 | 0.87 | 0 |
| 40 | South Africa  | Female | 50-69 years      | 0.55 | 0.5  | 0.6  | 0 |
| 41 | South Africa  | Female | 70+ years        | 0.7  | 0.67 | 0.73 | 0 |
| 42 | South Africa  | Female | Age-standardized | 0.58 | 0.54 | 0.62 | 0 |
| 43 | South Africa  | Both   | All Ages         | 1.48 | 1.41 | 1.56 | 0 |
| 44 | South Africa  | Both   | 15-49 years      | 0.98 | 0.9  | 1.06 | 0 |
| 45 | South Africa  | Both   | 50-69 years      | 0.64 | 0.61 | 0.68 | 0 |
| 46 | South Africa  | Both   | 70+ years        | 0.5  | 0.43 | 0.56 | 0 |
| 47 | South Africa  | Both   | Age-standardized | 0.88 | 0.83 | 0.92 | 0 |
| 48 | Costa Rica    | Both   | Age-standardized | 0.88 | 0.83 | 0.92 | 0 |
| 49 | Philippines   | Male   | All Ages         | 1.56 | 1.51 | 1.62 | 0 |
| 50 | Philippines   | Male   | 15-49 years      | 0.97 | 0.87 | 1.06 | 0 |
| 51 | Philippines   | Male   | 50-69 years      | 0.77 | 0.7  | 0.85 | 0 |
| 52 | Philippines   | Male   | 70+ years        | 0.7  | 0.62 | 0.79 | 0 |
| 53 | Philippines   | Male   | Age-standardized | 0.76 | 0.69 | 0.84 | 0 |
| 54 | Philippines   | Female | All Ages         | 1.56 | 1.49 | 1.63 | 0 |
| 55 | Philippines   | Female | 15-49 years      | 0.87 | 0.76 | 0.98 | 0 |
| 56 | Philippines   | Female | 50-69 years      | 0.73 | 0.63 | 0.83 | 0 |
| 57 | Philippines   | Female | 70+ years        | 0.63 | 0.54 | 0.72 | 0 |
| 58 | Philippines   | Female | Age-standardized | 0.67 | 0.57 | 0.76 | 0 |
| 59 | Philippines   | Both   | All Ages         | 1.57 | 1.51 | 1.62 | 0 |
| 60 | Philippines   | Both   | 15-49 years      | 0.94 | 0.84 | 1.04 | 0 |

|    |             |        |                  |      |       |      |       |
|----|-------------|--------|------------------|------|-------|------|-------|
| 1  |             |        |                  |      |       |      |       |
| 2  | Philippines | Both   | 50-69 years      | 0.75 | 0.67  | 0.83 | 0     |
| 3  | Philippines | Both   | 70+ years        | 0.6  | 0.51  | 0.69 | 0     |
| 4  | Liberia     | Both   | Age-standardized | 0.87 | 0.72  | 1.02 | 0     |
| 5  | Cameroon    | Male   | All Ages         | 0.86 | 0.8   | 0.91 | 0     |
| 6  | Cameroon    | Male   | 15-49 years      | 0.73 | 0.7   | 0.76 | 0     |
| 7  | Cameroon    | Male   | 50-69 years      | 0.65 | 0.63  | 0.66 | 0     |
| 8  | Cameroon    | Male   | 70+ years        | 0.67 | 0.65  | 0.69 | 0     |
| 9  | Cameroon    | Male   | Age-standardized | 0.68 | 0.67  | 0.7  | 0     |
| 10 | Cameroon    | Female | All Ages         | 0.64 | 0.57  | 0.71 | 0     |
| 11 | Cameroon    | Female | 15-49 years      | 0.58 | 0.54  | 0.62 | 0     |
| 12 | Cameroon    | Female | 50-69 years      | 0.51 | 0.47  | 0.55 | 0     |
| 13 | Cameroon    | Female | 70+ years        | 0.69 | 0.65  | 0.73 | 0     |
| 14 | Cameroon    | Female | Age-standardized | 0.57 | 0.53  | 0.61 | 0     |
| 15 | Cameroon    | Both   | All Ages         | 0.78 | 0.73  | 0.84 | 0     |
| 16 | Cameroon    | Both   | 15-49 years      | 0.71 | 0.68  | 0.74 | 0     |
| 17 | Cameroon    | Both   | 50-69 years      | 0.62 | 0.6   | 0.63 | 0     |
| 18 | Cameroon    | Both   | 70+ years        | 0.63 | 0.61  | 0.66 | 0     |
| 19 | Cameroon    | Both   | Age-standardized | 0.87 | 0.82  | 0.92 | 0     |
| 20 | Georgia     | Both   | Age-standardized | 0.87 | 0.82  | 0.92 | 0     |
| 21 | Kyrgyzstan  | Male   | All Ages         | 0.98 | 0.89  | 1.07 | 0     |
| 22 | Kyrgyzstan  | Male   | 15-49 years      | 0.69 | 0.58  | 0.8  | 0     |
| 23 | Kyrgyzstan  | Male   | 50-69 years      | 0.01 | -0.11 | 0.14 | 0.847 |
| 24 | Kyrgyzstan  | Male   | 70+ years        | 0.58 | 0.56  | 0.59 | 0     |
| 25 | Kyrgyzstan  | Male   | Age-standardized | 0.47 | 0.38  | 0.56 | 0     |
| 26 | Kyrgyzstan  | Female | All Ages         | 0.92 | 0.8   | 1.04 | 0     |
| 27 | Kyrgyzstan  | Female | 15-49 years      | 0.7  | 0.61  | 0.79 | 0     |
| 28 | Kyrgyzstan  | Female | 50-69 years      | 0.21 | 0.1   | 0.32 | 0.001 |
| 29 | Kyrgyzstan  | Female | 70+ years        | 0.86 | 0.78  | 0.95 | 0     |
| 30 | Kyrgyzstan  | Female | Age-standardized | 0.63 | 0.53  | 0.73 | 0     |
| 31 | Kyrgyzstan  | Both   | All Ages         | 0.96 | 0.86  | 1.06 | 0     |
| 32 | Kyrgyzstan  | Both   | 15-49 years      | 0.69 | 0.59  | 0.8  | 0     |
| 33 | Kyrgyzstan  | Both   | 50-69 years      | 0.11 | -0.01 | 0.23 | 0.072 |
| 34 | Kyrgyzstan  | Both   | 70+ years        | 0.88 | 0.84  | 0.92 | 0     |
| 35 | Kyrgyzstan  | Both   | Age-standardized | 0.86 | 0.81  | 0.91 | 0     |
| 36 | Macedonia   | Both   | Age-standardized | 0.86 | 0.81  | 0.91 | 0     |
| 37 | Chad        | Male   | All Ages         | 0.3  | 0.29  | 0.32 | 0     |
| 38 | Chad        | Male   | 15-49 years      | 0.57 | 0.53  | 0.6  | 0     |
| 39 | Chad        | Male   | 50-69 years      | 0.55 | 0.54  | 0.57 | 0     |
| 40 | Chad        | Male   | 70+ years        | 0.63 | 0.62  | 0.65 | 0     |
| 41 | Chad        | Male   | Age-standardized | 0.59 | 0.58  | 0.61 | 0     |
| 42 | Chad        | Female | All Ages         | 0.1  | 0.06  | 0.14 | 0     |
| 43 | Chad        | Female | 15-49 years      | 0.57 | 0.54  | 0.59 | 0     |
| 44 | Chad        | Female | 50-69 years      | 0.55 | 0.53  | 0.58 | 0     |
| 45 | Chad        | Female | 70+ years        | 0.7  | 0.69  | 0.71 | 0     |
| 46 | Chad        | Female | Age-standardized | 0.64 | 0.61  | 0.66 | 0     |
| 47 | Chad        | Both   | All Ages         | 0.24 | 0.22  | 0.26 | 0     |
| 48 | Chad        | Both   | 15-49 years      | 0.58 | 0.56  | 0.61 | 0     |
| 49 | Chad        | Both   | 50-69 years      | 0.7  | 0.69  | 0.72 | 0     |
| 50 | Chad        | Both   | 70+ years        | 0.75 | 0.74  | 0.76 | 0     |
| 51 | Chad        | Both   | Age-standardized | 0.85 | 0.79  | 0.9  | 0     |
| 52 | Lithuania   | Both   | Age-standardized | 0.85 | 0.79  | 0.9  | 0     |
| 53 | Uganda      | Male   | All Ages         | 0.67 | 0.51  | 0.82 | 0     |
| 54 | Uganda      | Male   | 15-49 years      | 0.8  | 0.73  | 0.86 | 0     |
| 55 | Uganda      | Male   | 50-69 years      | 0.69 | 0.66  | 0.72 | 0     |
| 56 | Uganda      | Male   | 70+ years        | 0.79 | 0.73  | 0.84 | 0     |
| 57 | Uganda      | Male   | Age-standardized | 0.78 | 0.74  | 0.83 | 0     |
| 58 | Uganda      | Female | All Ages         | 0.4  | 0.26  | 0.55 | 0     |
| 59 | Uganda      | Female | 15-49 years      | 0.29 | 0.24  | 0.35 | 0     |
| 60 | Uganda      | Female | 50-69 years      | 0.1  | 0.09  | 0.12 | 0     |

|    |                |        |                  |      |       |      |       |
|----|----------------|--------|------------------|------|-------|------|-------|
| 1  |                |        |                  |      |       |      |       |
| 2  | Uganda         | Female | 70+ years        | 0.28 | 0.24  | 0.32 | 0     |
| 3  | Uganda         | Female | Age-standardized | 0.23 | 0.2   | 0.25 | 0     |
| 4  | Uganda         | Both   | All Ages         | 0.57 | 0.42  | 0.73 | 0     |
| 5  | Uganda         | Both   | 15-49 years      | 0.61 | 0.55  | 0.68 | 0     |
| 6  | Uganda         | Both   | 50-69 years      | 0.37 | 0.35  | 0.4  | 0     |
| 7  | Uganda         | Both   | 70+ years        | 0.29 | 0.25  | 0.33 | 0     |
| 8  | Romania        | Both   | Age-standardized | 0.85 | 0.83  | 0.87 | 0     |
| 9  | Comoros        | Male   | All Ages         | 1.53 | 1.5   | 1.56 | 0     |
| 10 | Comoros        | Male   | 15-49 years      | 0.96 | 0.94  | 0.98 | 0     |
| 11 | Comoros        | Male   | 50-69 years      | 0.54 | 0.52  | 0.56 | 0     |
| 12 | Comoros        | Male   | 70+ years        | 0.57 | 0.54  | 0.6  | 0     |
| 13 | Comoros        | Male   | Age-standardized | 0.58 | 0.56  | 0.6  | 0     |
| 14 | Comoros        | Female | All Ages         | 1.03 | 0.99  | 1.08 | 0     |
| 15 | Comoros        | Female | 15-49 years      | 0.38 | 0.37  | 0.4  | 0     |
| 16 | Comoros        | Female | 50-69 years      | 0.04 | 0.01  | 0.07 | 0.008 |
| 17 | Comoros        | Female | 70+ years        | 0.19 | 0.16  | 0.21 | 0     |
| 18 | Comoros        | Female | Age-standardized | 0.1  | 0.07  | 0.13 | 0     |
| 19 | Comoros        | Both   | All Ages         | 1.35 | 1.32  | 1.38 | 0     |
| 20 | Comoros        | Both   | 15-49 years      | 0.79 | 0.78  | 0.8  | 0     |
| 21 | Comoros        | Both   | 50-69 years      | 0.28 | 0.24  | 0.32 | 0     |
| 22 | Comoros        | Both   | 70+ years        | 0.28 | 0.26  | 0.3  | 0     |
| 23 | American Samoa | Both   | Age-standardized | 0.84 | 0.82  | 0.86 | 0     |
| 24 | Nigeria        | Male   | All Ages         | 0.07 | -0.02 | 0.15 | 0.127 |
| 25 | Nigeria        | Male   | 15-49 years      | 0.52 | 0.44  | 0.6  | 0     |
| 26 | Nigeria        | Male   | 50-69 years      | 0.56 | 0.49  | 0.63 | 0     |
| 27 | Nigeria        | Male   | 70+ years        | 0.54 | 0.46  | 0.63 | 0     |
| 28 | Nigeria        | Male   | Age-standardized | 0.6  | 0.52  | 0.68 | 0     |
| 29 | Nigeria        | Female | All Ages         | 0.25 | 0.1   | 0.41 | 0.002 |
| 30 | Nigeria        | Female | 15-49 years      | 0.38 | 0.22  | 0.54 | 0     |
| 31 | Nigeria        | Female | 50-69 years      | 0.15 | 0.02  | 0.28 | 0.029 |
| 32 | Nigeria        | Female | 70+ years        | 0.28 | 0.13  | 0.42 | 0.001 |
| 33 | Nigeria        | Female | Age-standardized | 0.23 | 0.09  | 0.37 | 0.002 |
| 34 | Nigeria        | Both   | All Ages         | 0.09 | -0.03 | 0.21 | 0.133 |
| 35 | Nigeria        | Both   | 15-49 years      | 0.41 | 0.3   | 0.52 | 0     |
| 36 | Nigeria        | Both   | 50-69 years      | 0.14 | 0.01  | 0.27 | 0.04  |
| 37 | Nigeria        | Both   | 70+ years        | 0.59 | 0.45  | 0.74 | 0     |
| 38 | South Korea    | Both   | Age-standardized | 0.84 | 0.8   | 0.88 | 0     |
| 39 | Middle SDI     | Male   | All Ages         | 2.03 | 2.01  | 2.04 | 0     |
| 40 | Middle SDI     | Male   | 15-49 years      | 1.32 | 1.27  | 1.36 | 0     |
| 41 | Middle SDI     | Male   | 50-69 years      | 0.93 | 0.91  | 0.95 | 0     |
| 42 | Middle SDI     | Male   | 70+ years        | 0.74 | 0.72  | 0.77 | 0     |
| 43 | Middle SDI     | Male   | Age-standardized | 0.94 | 0.93  | 0.96 | 0     |
| 44 | Middle SDI     | Female | All Ages         | 2.17 | 2.14  | 2.2  | 0     |
| 45 | Middle SDI     | Female | 15-49 years      | 1.36 | 1.31  | 1.42 | 0     |
| 46 | Middle SDI     | Female | 50-69 years      | 1.01 | 0.98  | 1.04 | 0     |
| 47 | Middle SDI     | Female | 70+ years        | 0.91 | 0.88  | 0.94 | 0     |
| 48 | Middle SDI     | Female | Age-standardized | 0.97 | 0.94  | 0.99 | 0     |
| 49 | Middle SDI     | Both   | All Ages         | 2.08 | 2.06  | 2.09 | 0     |
| 50 | Middle SDI     | Both   | 15-49 years      | 1.33 | 1.28  | 1.38 | 0     |
| 51 | Middle SDI     | Both   | 50-69 years      | 0.95 | 0.92  | 0.97 | 0     |
| 52 | Middle SDI     | Both   | 70+ years        | 0.83 | 0.8   | 0.86 | 0     |
| 53 | Middle SDI     | Both   | Age-standardized | 0.94 | 0.92  | 0.96 | 0     |
| 54 | South Korea    | Male   | All Ages         | 1.94 | 1.9   | 1.99 | 0     |
| 55 | South Korea    | Male   | 15-49 years      | 1.06 | 0.97  | 1.15 | 0     |
| 56 | South Korea    | Male   | 50-69 years      | 0.71 | 0.66  | 0.76 | 0     |
| 57 | South Korea    | Male   | 70+ years        | 0.48 | 0.45  | 0.5  | 0     |

|    |             |        |                  |      |      |      |   |
|----|-------------|--------|------------------|------|------|------|---|
| 1  |             |        |                  |      |      |      |   |
| 2  | South Korea | Male   | Age-standardized | 0.69 | 0.65 | 0.73 | 0 |
| 3  | South Korea | Female | All Ages         | 2.44 | 2.37 | 2.51 | 0 |
| 4  | South Korea | Female | 15-49 years      | 1.29 | 1.19 | 1.4  | 0 |
| 5  | South Korea | Female | 50-69 years      | 0.97 | 0.89 | 1.06 | 0 |
| 6  | South Korea | Female | 70+ years        | 0.94 | 0.87 | 1.01 | 0 |
| 7  | South Korea | Female | Age-standardized | 0.96 | 0.9  | 1.02 | 0 |
| 8  | South Korea | Both   | All Ages         | 2.1  | 2.05 | 2.15 | 0 |
| 9  | South Korea | Both   | 15-49 years      | 1.14 | 1.06 | 1.23 | 0 |
| 10 | South Korea | Both   | 50-69 years      | 0.89 | 0.82 | 0.96 | 0 |
| 11 | South Korea | Both   | 70+ years        | 0.82 | 0.78 | 0.86 | 0 |
| 12 | Sri Lanka   | Both   | Age-standardized | 0.84 | 0.79 | 0.88 | 0 |
| 13 | Greenland   | Male   | All Ages         | 1.55 | 1.5  | 1.61 | 0 |
| 14 | Greenland   | Male   | 15-49 years      | 0.86 | 0.77 | 0.95 | 0 |
| 15 | Greenland   | Male   | 50-69 years      | 0.92 | 0.86 | 0.98 | 0 |
| 16 | Greenland   | Male   | 70+ years        | 0.65 | 0.6  | 0.69 | 0 |
| 17 | Greenland   | Male   | Age-standardized | 0.87 | 0.82 | 0.92 | 0 |
| 18 | Greenland   | Female | All Ages         | 1.48 | 1.41 | 1.54 | 0 |
| 19 | Greenland   | Female | 15-49 years      | 0.62 | 0.57 | 0.67 | 0 |
| 20 | Greenland   | Female | 50-69 years      | 0.62 | 0.57 | 0.67 | 0 |
| 21 | Greenland   | Female | 70+ years        | 0.69 | 0.63 | 0.75 | 0 |
| 22 | Greenland   | Female | Age-standardized | 0.65 | 0.62 | 0.69 | 0 |
| 23 | Greenland   | Both   | All Ages         | 1.5  | 1.45 | 1.56 | 0 |
| 24 | Greenland   | Both   | 15-49 years      | 0.69 | 0.62 | 0.77 | 0 |
| 25 | Greenland   | Both   | 50-69 years      | 0.87 | 0.8  | 0.95 | 0 |
| 26 | Greenland   | Both   | 70+ years        | 0.81 | 0.75 | 0.86 | 0 |
| 27 | Lesotho     | Both   | Age-standardized | 0.83 | 0.82 | 0.85 | 0 |
| 28 | Chile       | Male   | All Ages         | 2.04 | 1.9  | 2.18 | 0 |
| 29 | Chile       | Male   | 15-49 years      | 1.31 | 1.15 | 1.47 | 0 |
| 30 | Chile       | Male   | 50-69 years      | 1.05 | 0.94 | 1.16 | 0 |
| 31 | Chile       | Male   | 70+ years        | 0.79 | 0.68 | 0.9  | 0 |
| 32 | Chile       | Male   | Age-standardized | 1.08 | 0.97 | 1.2  | 0 |
| 33 | Chile       | Female | All Ages         | 2.24 | 2.15 | 2.33 | 0 |
| 34 | Chile       | Female | 15-49 years      | 1.41 | 1.29 | 1.53 | 0 |
| 35 | Chile       | Female | 50-69 years      | 1.17 | 1.09 | 1.24 | 0 |
| 36 | Chile       | Female | 70+ years        | 1.08 | 1    | 1.16 | 0 |
| 37 | Chile       | Female | Age-standardized | 1.2  | 1.12 | 1.28 | 0 |
| 38 | Chile       | Both   | All Ages         | 2.11 | 1.99 | 2.23 | 0 |
| 39 | Chile       | Both   | 15-49 years      | 1.36 | 1.21 | 1.5  | 0 |
| 40 | Chile       | Both   | 50-69 years      | 1.11 | 1.01 | 1.21 | 0 |
| 41 | Chile       | Both   | 70+ years        | 0.94 | 0.85 | 1.03 | 0 |
| 42 | Cambodia    | Both   | Age-standardized | 0.83 | 0.81 | 0.86 | 0 |
| 43 | Congo       | Male   | All Ages         | 1.5  | 1.46 | 1.55 | 0 |
| 44 | Congo       | Male   | 15-49 years      | 1.17 | 1.11 | 1.23 | 0 |
| 45 | Congo       | Male   | 50-69 years      | 0.66 | 0.62 | 0.69 | 0 |
| 46 | Congo       | Male   | 70+ years        | 0.67 | 0.63 | 0.7  | 0 |
| 47 | Congo       | Male   | Age-standardized | 0.71 | 0.68 | 0.75 | 0 |
| 48 | Congo       | Female | All Ages         | 0.97 | 0.91 | 1.03 | 0 |
| 49 | Congo       | Female | 15-49 years      | 0.74 | 0.68 | 0.8  | 0 |
| 50 | Congo       | Female | 50-69 years      | 0.33 | 0.28 | 0.37 | 0 |
| 51 | Congo       | Female | 70+ years        | 0.52 | 0.48 | 0.56 | 0 |
| 52 | Congo       | Female | Age-standardized | 0.42 | 0.38 | 0.45 | 0 |
| 53 | Congo       | Both   | All Ages         | 1.31 | 1.26 | 1.35 | 0 |
| 54 | Congo       | Both   | 15-49 years      | 1.01 | 0.97 | 1.06 | 0 |
| 55 | Congo       | Both   | 50-69 years      | 0.6  | 0.56 | 0.63 | 0 |
| 56 | Congo       | Both   | 70+ years        | 0.64 | 0.59 | 0.68 | 0 |
| 57 | Andorra     | Both   | Age-standardized | 0.82 | 0.71 | 0.92 | 0 |



|    |                      |        |                  |      |      |      |       |
|----|----------------------|--------|------------------|------|------|------|-------|
| 1  |                      |        |                  |      |      |      |       |
| 2  | Kazakhstan           | Male   | All Ages         | 1.06 | 1.02 | 1.09 | 0     |
| 3  | Kazakhstan           | Male   | 15-49 years      | 0.73 | 0.58 | 0.87 | 0     |
| 4  | Kazakhstan           | Male   | 50-69 years      | 0.19 | 0.08 | 0.3  | 0.002 |
| 5  | Kazakhstan           | Male   | 70+ years        | 0.45 | 0.39 | 0.5  | 0     |
| 6  | Kazakhstan           | Male   | Age-standardized | 0.44 | 0.34 | 0.55 | 0     |
| 7  | Kazakhstan           | Female | All Ages         | 0.85 | 0.79 | 0.9  | 0     |
| 8  | Kazakhstan           | Female | 15-49 years      | 0.48 | 0.36 | 0.6  | 0     |
| 9  | Kazakhstan           | Female | 50-69 years      | 0.19 | 0.07 | 0.3  | 0.003 |
| 10 | Kazakhstan           | Female | 70+ years        | 0.59 | 0.44 | 0.73 | 0     |
| 11 | Kazakhstan           | Female | Age-standardized | 0.38 | 0.27 | 0.5  | 0     |
| 12 | Kazakhstan           | Both   | All Ages         | 0.97 | 0.92 | 1.02 | 0     |
| 13 | Kazakhstan           | Both   | 15-49 years      | 0.63 | 0.49 | 0.77 | 0     |
| 14 | Kazakhstan           | Both   | 50-69 years      | 0.2  | 0.08 | 0.31 | 0.002 |
| 15 | Kazakhstan           | Both   | 70+ years        | 0.67 | 0.59 | 0.75 | 0     |
| 16 | Kazakhstan           | Both   | Age-standardized | 0.81 | 0.73 | 0.88 | 0     |
| 17 | Croatia              | Both   | All Ages         | 0.57 | 0.49 | 0.64 | 0     |
| 18 | Madagascar           | Male   | 15-49 years      | 0.56 | 0.53 | 0.59 | 0     |
| 19 | Madagascar           | Male   | 50-69 years      | 0.4  | 0.36 | 0.43 | 0     |
| 20 | Madagascar           | Male   | 70+ years        | 0.54 | 0.5  | 0.58 | 0     |
| 21 | Madagascar           | Male   | Age-standardized | 0.49 | 0.45 | 0.53 | 0     |
| 22 | Madagascar           | Female | All Ages         | 0.44 | 0.35 | 0.53 | 0     |
| 23 | Madagascar           | Female | 15-49 years      | 0.36 | 0.33 | 0.4  | 0     |
| 24 | Madagascar           | Female | 50-69 years      | 0.15 | 0.1  | 0.21 | 0     |
| 25 | Madagascar           | Female | 70+ years        | 0.36 | 0.31 | 0.41 | 0     |
| 26 | Madagascar           | Female | Age-standardized | 0.26 | 0.21 | 0.31 | 0     |
| 27 | Madagascar           | Both   | All Ages         | 0.52 | 0.44 | 0.6  | 0     |
| 28 | Madagascar           | Both   | 15-49 years      | 0.49 | 0.46 | 0.52 | 0     |
| 29 | Madagascar           | Both   | 50-69 years      | 0.31 | 0.26 | 0.36 | 0     |
| 30 | Madagascar           | Both   | 70+ years        | 0.27 | 0.22 | 0.31 | 0     |
| 31 | Madagascar           | Both   | Age-standardized | 0.8  | 0.73 | 0.87 | 0     |
| 32 | Virgin Islands, U.S. | Both   | All Ages         | 1.69 | 1.6  | 1.77 | 0     |
| 33 | Slovenia             | Male   | 15-49 years      | 1.17 | 1.12 | 1.21 | 0     |
| 34 | Slovenia             | Male   | 50-69 years      | 0.52 | 0.44 | 0.59 | 0     |
| 35 | Slovenia             | Male   | 70+ years        | 0.67 | 0.56 | 0.78 | 0     |
| 36 | Slovenia             | Male   | Age-standardized | 0.74 | 0.7  | 0.78 | 0     |
| 37 | Slovenia             | Female | All Ages         | 2.13 | 2.01 | 2.24 | 0     |
| 38 | Slovenia             | Female | 15-49 years      | 1.45 | 1.39 | 1.5  | 0     |
| 39 | Slovenia             | Female | 50-69 years      | 1.3  | 1.19 | 1.41 | 0     |
| 40 | Slovenia             | Female | 70+ years        | 1.31 | 1.18 | 1.43 | 0     |
| 41 | Slovenia             | Female | Age-standardized | 1.3  | 1.24 | 1.36 | 0     |
| 42 | Slovenia             | Both   | All Ages         | 1.88 | 1.78 | 1.98 | 0     |
| 43 | Slovenia             | Both   | 15-49 years      | 1.28 | 1.24 | 1.32 | 0     |
| 44 | Slovenia             | Both   | 50-69 years      | 0.93 | 0.84 | 1.03 | 0     |
| 45 | Slovenia             | Both   | 70+ years        | 1.14 | 1.02 | 1.26 | 0     |
| 46 | Slovenia             | Both   | Age-standardized | 0.78 | 0.74 | 0.82 | 0     |
| 47 | Albania              | Both   | All Ages         | 2.54 | 2.48 | 2.59 | 0     |
| 48 | Saudi Arabia         | Male   | 15-49 years      | 1.57 | 1.49 | 1.64 | 0     |
| 49 | Saudi Arabia         | Male   | 50-69 years      | 1.03 | 0.98 | 1.08 | 0     |
| 50 | Saudi Arabia         | Male   | 70+ years        | 0.88 | 0.83 | 0.94 | 0     |
| 51 | Saudi Arabia         | Male   | Age-standardized | 1.13 | 1.07 | 1.2  | 0     |
| 52 | Saudi Arabia         | Female | All Ages         | 3.35 | 3.24 | 3.46 | 0     |
| 53 | Saudi Arabia         | Female | 15-49 years      | 2.02 | 1.9  | 2.15 | 0     |
| 54 | Saudi Arabia         | Female | 50-69 years      | 1.45 | 1.31 | 1.59 | 0     |
| 55 | Saudi Arabia         | Female | 70+ years        | 1.31 | 1.15 | 1.46 | 0     |
| 56 | Saudi Arabia         | Female | Age-standardized | 1.49 | 1.35 | 1.63 | 0     |
| 57 | Saudi Arabia         | Both   | All Ages         | 2.83 | 2.77 | 2.89 | 0     |
| 58 |                      |        |                  |      |      |      |       |
| 59 |                      |        |                  |      |      |      |       |
| 60 |                      |        |                  |      |      |      |       |



|    |              |        |                  |      |      |      |   |
|----|--------------|--------|------------------|------|------|------|---|
| 1  |              |        |                  |      |      |      |   |
| 2  | Saudi Arabia | Both   | 15-49 years      | 1.7  | 1.61 | 1.78 | 0 |
| 3  | Saudi Arabia | Both   | 50-69 years      | 1.16 | 1.09 | 1.23 | 0 |
| 4  | Saudi Arabia | Both   | 70+ years        | 1.08 | 1    | 1.15 | 0 |
| 5  | Italy        | Both   | Age-standardized | 0.78 | 0.68 | 0.89 | 0 |
| 6  | Saint Lucia  | Male   | All Ages         | 2.65 | 2.55 | 2.74 | 0 |
| 7  | Saint Lucia  | Male   | 15-49 years      | 1.62 | 1.51 | 1.73 | 0 |
| 8  | Saint Lucia  | Male   | 50-69 years      | 0.92 | 0.84 | 0.99 | 0 |
| 9  | Saint Lucia  | Male   | 70+ years        | 0.66 | 0.6  | 0.73 | 0 |
| 10 | Saint Lucia  | Male   | Age-standardized | 1.02 | 0.94 | 1.1  | 0 |
| 11 | Saint Lucia  | Female | All Ages         | 2.61 | 2.48 | 2.73 | 0 |
| 12 | Saint Lucia  | Female | 15-49 years      | 1.67 | 1.51 | 1.82 | 0 |
| 13 | Saint Lucia  | Female | 50-69 years      | 0.97 | 0.84 | 1.11 | 0 |
| 14 | Saint Lucia  | Female | 70+ years        | 0.87 | 0.72 | 1.02 | 0 |
| 15 | Saint Lucia  | Female | Age-standardized | 1.05 | 0.92 | 1.19 | 0 |
| 16 | Saint Lucia  | Both   | All Ages         | 2.65 | 2.54 | 2.75 | 0 |
| 17 | Saint Lucia  | Both   | 15-49 years      | 1.66 | 1.53 | 1.79 | 0 |
| 18 | Saint Lucia  | Both   | 50-69 years      | 1    | 0.89 | 1.1  | 0 |
| 19 | Saint Lucia  | Both   | 70+ years        | 0.8  | 0.7  | 0.91 | 0 |
| 20 | Saint Lucia  | Both   | Age-standardized | 0.78 | 0.73 | 0.84 | 0 |
| 21 | Ecuador      | Both   | Age-standardized | 0.78 | 0.73 | 0.84 | 0 |
| 22 | Global       | Male   | All Ages         | 1.69 | 1.68 | 1.7  | 0 |
| 23 | Global       | Male   | 15-49 years      | 1.23 | 1.2  | 1.26 | 0 |
| 24 | Global       | Male   | 50-69 years      | 0.99 | 0.97 | 1.01 | 0 |
| 25 | Global       | Male   | 70+ years        | 0.77 | 0.75 | 0.8  | 0 |
| 26 | Global       | Male   | Age-standardized | 1    | 0.99 | 1.02 | 0 |
| 27 | Global       | Female | All Ages         | 1.82 | 1.8  | 1.83 | 0 |
| 28 | Global       | Female | 15-49 years      | 1.3  | 1.26 | 1.34 | 0 |
| 29 | Global       | Female | 50-69 years      | 1.18 | 1.16 | 1.2  | 0 |
| 30 | Global       | Female | 70+ years        | 1    | 0.97 | 1.04 | 0 |
| 31 | Global       | Female | Age-standardized | 1.12 | 1.1  | 1.13 | 0 |
| 32 | Global       | Both   | All Ages         | 1.74 | 1.73 | 1.75 | 0 |
| 33 | Global       | Both   | 15-49 years      | 1.25 | 1.22 | 1.28 | 0 |
| 34 | Global       | Both   | 50-69 years      | 1.06 | 1.04 | 1.08 | 0 |
| 35 | Global       | Both   | 70+ years        | 0.93 | 0.89 | 0.96 | 0 |
| 36 | Global       | Both   | Age-standardized | 1.05 | 1.04 | 1.07 | 0 |
| 37 | Finland      | Male   | All Ages         | 2.19 | 2    | 2.38 | 0 |
| 38 | Finland      | Male   | 15-49 years      | 1.67 | 1.5  | 1.84 | 0 |
| 39 | Finland      | Male   | 50-69 years      | 1.75 | 1.6  | 1.91 | 0 |
| 40 | Finland      | Male   | 70+ years        | 1.49 | 1.33 | 1.65 | 0 |
| 41 | Finland      | Male   | Age-standardized | 1.73 | 1.56 | 1.9  | 0 |
| 42 | Finland      | Female | All Ages         | 1.92 | 1.8  | 2.03 | 0 |
| 43 | Finland      | Female | 15-49 years      | 1.41 | 1.31 | 1.51 | 0 |
| 44 | Finland      | Female | 50-69 years      | 1.53 | 1.43 | 1.62 | 0 |
| 45 | Finland      | Female | 70+ years        | 1.33 | 1.21 | 1.44 | 0 |
| 46 | Finland      | Female | Age-standardized | 1.49 | 1.37 | 1.6  | 0 |
| 47 | Finland      | Both   | All Ages         | 2.12 | 1.96 | 2.28 | 0 |
| 48 | Finland      | Both   | 15-49 years      | 1.61 | 1.46 | 1.75 | 0 |
| 49 | Finland      | Both   | 50-69 years      | 1.74 | 1.59 | 1.89 | 0 |
| 50 | Finland      | Both   | 70+ years        | 1.65 | 1.51 | 1.79 | 0 |
| 51 | Finland      | Both   | Age-standardized | 0.78 | 0.71 | 0.86 | 0 |
| 52 | Fiji         | Both   | Age-standardized | 0.78 | 0.71 | 0.86 | 0 |
| 53 | Tunisia      | Male   | All Ages         | 2.2  | 2.18 | 2.22 | 0 |
| 54 | Tunisia      | Male   | 15-49 years      | 1.38 | 1.35 | 1.42 | 0 |
| 55 | Tunisia      | Male   | 50-69 years      | 0.83 | 0.81 | 0.86 | 0 |
| 56 | Tunisia      | Male   | 70+ years        | 0.63 | 0.62 | 0.65 | 0 |
| 57 | Tunisia      | Male   | Age-standardized | 0.86 | 0.84 | 0.88 | 0 |
| 58 | Tunisia      | Female | All Ages         | 2.45 | 2.43 | 2.48 | 0 |
| 59 | Tunisia      | Female | 15-49 years      | 1.55 | 1.5  | 1.6  | 0 |
| 60 | Tunisia      | Female | 15-49 years      | 1.55 | 1.5  | 1.6  | 0 |

|    |                       |        |                  |       |       |       |       |
|----|-----------------------|--------|------------------|-------|-------|-------|-------|
| 1  |                       |        |                  |       |       |       |       |
| 2  | Tunisia               | Female | 50-69 years      | 0.99  | 0.97  | 1.01  | 0     |
| 3  | Tunisia               | Female | 70+ years        | 0.83  | 0.82  | 0.84  | 0     |
| 4  | Tunisia               | Female | Age-standardized | 1.01  | 0.99  | 1.03  | 0     |
| 5  | Tunisia               | Both   | All Ages         | 2.28  | 2.27  | 2.3   | 0     |
| 6  | Tunisia               | Both   | 15-49 years      | 1.43  | 1.39  | 1.47  | 0     |
| 7  | Tunisia               | Both   | 50-69 years      | 0.88  | 0.86  | 0.91  | 0     |
| 8  | Tunisia               | Both   | 70+ years        | 0.62  | 0.61  | 0.63  | 0     |
| 9  | Greenland             | Both   | Age-standardized | 0.78  | 0.73  | 0.83  | 0     |
| 10 | Bulgaria              | Male   | All Ages         | 0.5   | 0.39  | 0.62  | 0     |
| 11 | Bulgaria              | Male   | 15-49 years      | 0.33  | 0.12  | 0.55  | 0.003 |
| 12 | Bulgaria              | Male   | 50-69 years      | -0.35 | -0.53 | -0.18 | 0     |
| 13 | Bulgaria              | Male   | 70+ years        | -0.16 | -0.24 | -0.07 | 0.001 |
| 14 | Bulgaria              | Male   | Age-standardized | -0.06 | -0.2  | 0.09  | 0.425 |
| 15 | Bulgaria              | Female | All Ages         | 1.2   | 1.08  | 1.32  | 0     |
| 16 | Bulgaria              | Female | 15-49 years      | 0.49  | 0.31  | 0.68  | 0     |
| 17 | Bulgaria              | Female | 50-69 years      | 0.38  | 0.17  | 0.59  | 0.001 |
| 18 | Bulgaria              | Female | 70+ years        | 0.34  | 0.19  | 0.48  | 0     |
| 19 | Bulgaria              | Female | Age-standardized | 0.33  | 0.18  | 0.48  | 0     |
| 20 | Bulgaria              | Both   | All Ages         | 0.77  | 0.65  | 0.89  | 0     |
| 21 | Bulgaria              | Both   | 15-49 years      | 0.42  | 0.22  | 0.63  | 0     |
| 22 | Bulgaria              | Both   | 50-69 years      | -0.06 | -0.26 | 0.14  | 0.543 |
| 23 | Bulgaria              | Both   | 70+ years        | 0.02  | -0.1  | 0.14  | 0.749 |
| 24 | Bulgaria              | Both   | Age-standardized | 0.11  | -0.05 | 0.26  | 0.171 |
| 25 | Cote d'Ivoire         | Male   | All Ages         | 1.7   | 1.55  | 1.85  | 0     |
| 26 | Cote d'Ivoire         | Male   | 15-49 years      | 1.39  | 1.26  | 1.51  | 0     |
| 27 | Cote d'Ivoire         | Male   | 50-69 years      | 1.14  | 1.02  | 1.27  | 0     |
| 28 | Cote d'Ivoire         | Male   | 70+ years        | 1.16  | 1     | 1.31  | 0     |
| 29 | Cote d'Ivoire         | Male   | Age-standardized | 1.2   | 1.06  | 1.34  | 0     |
| 30 | Cote d'Ivoire         | Female | All Ages         | 1.46  | 1.28  | 1.64  | 0     |
| 31 | Cote d'Ivoire         | Female | 15-49 years      | 1.06  | 0.92  | 1.2   | 0     |
| 32 | Cote d'Ivoire         | Female | 50-69 years      | 0.84  | 0.69  | 1     | 0     |
| 33 | Cote d'Ivoire         | Female | 70+ years        | 0.98  | 0.81  | 1.15  | 0     |
| 34 | Cote d'Ivoire         | Female | Age-standardized | 0.9   | 0.74  | 1.07  | 0     |
| 35 | Cote d'Ivoire         | Both   | All Ages         | 1.62  | 1.46  | 1.78  | 0     |
| 36 | Cote d'Ivoire         | Both   | 15-49 years      | 1.27  | 1.15  | 1.4   | 0     |
| 37 | Cote d'Ivoire         | Both   | 50-69 years      | 1.03  | 0.9   | 1.16  | 0     |
| 38 | Cote d'Ivoire         | Both   | 70+ years        | 1.02  | 0.86  | 1.18  | 0     |
| 39 | Sao Tome and Principe | Both   | Age-standardized | 0.78  | 0.75  | 0.81  | 0     |
| 40 | Cambodia              | Male   | All Ages         | 2.24  | 2.14  | 2.35  | 0     |
| 41 | Cambodia              | Male   | 15-49 years      | 0.97  | 0.91  | 1.03  | 0     |
| 42 | Cambodia              | Male   | 50-69 years      | 0.77  | 0.74  | 0.81  | 0     |
| 43 | Cambodia              | Male   | 70+ years        | 0.63  | 0.6   | 0.66  | 0     |
| 44 | Cambodia              | Male   | Age-standardized | 0.75  | 0.72  | 0.78  | 0     |
| 45 | Cambodia              | Female | All Ages         | 2.2   | 2.12  | 2.29  | 0     |
| 46 | Cambodia              | Female | 15-49 years      | 0.98  | 0.92  | 1.04  | 0     |
| 47 | Cambodia              | Female | 50-69 years      | 0.93  | 0.91  | 0.95  | 0     |
| 48 | Cambodia              | Female | 70+ years        | 0.79  | 0.76  | 0.82  | 0     |
| 49 | Cambodia              | Female | Age-standardized | 0.87  | 0.85  | 0.9   | 0     |
| 50 | Cambodia              | Both   | All Ages         | 2.23  | 2.14  | 2.32  | 0     |
| 51 | Cambodia              | Both   | 15-49 years      | 1.02  | 0.96  | 1.07  | 0     |
| 52 | Cambodia              | Both   | 50-69 years      | 0.85  | 0.82  | 0.87  | 0     |
| 53 | Cambodia              | Both   | 70+ years        | 0.68  | 0.66  | 0.7   | 0     |
| 54 | Barbados              | Both   | Age-standardized | 0.77  | 0.71  | 0.83  | 0     |
| 55 | The Bahamas           | Male   | All Ages         | 1.64  | 1.58  | 1.69  | 0     |
| 56 | The Bahamas           | Male   | 15-49 years      | 1.02  | 0.89  | 1.15  | 0     |
| 57 | The Bahamas           | Male   | 50-69 years      | 0.62  | 0.54  | 0.7   | 0     |

|    |                    |        |                  |      |      |      |   |
|----|--------------------|--------|------------------|------|------|------|---|
| 1  |                    |        |                  |      |      |      |   |
| 2  | The Bahamas        | Male   | 70+ years        | 0.45 | 0.4  | 0.5  | 0 |
| 3  | The Bahamas        | Male   | Age-standardized | 0.66 | 0.59 | 0.73 | 0 |
| 4  | The Bahamas        | Female | All Ages         | 1.59 | 1.55 | 1.63 | 0 |
| 5  | The Bahamas        | Female | 15-49 years      | 1.01 | 0.89 | 1.13 | 0 |
| 6  | The Bahamas        | Female | 50-69 years      | 0.62 | 0.56 | 0.68 | 0 |
| 7  | The Bahamas        | Female | 70+ years        | 0.53 | 0.49 | 0.58 | 0 |
| 8  | The Bahamas        | Female | Age-standardized | 0.65 | 0.59 | 0.7  | 0 |
| 9  | The Bahamas        | Both   | All Ages         | 1.61 | 1.56 | 1.65 | 0 |
| 10 | The Bahamas        | Both   | 15-49 years      | 1.01 | 0.89 | 1.13 | 0 |
| 11 | The Bahamas        | Both   | 50-69 years      | 0.62 | 0.55 | 0.69 | 0 |
| 12 | The Bahamas        | Both   | 70+ years        | 0.56 | 0.52 | 0.6  | 0 |
| 13 | Moldova            | Both   | Age-standardized | 0.75 | 0.62 | 0.89 | 0 |
| 14 | Papua New Guinea   | Male   | All Ages         | 1.26 | 1.21 | 1.31 | 0 |
| 15 | Papua New Guinea   | Male   | 15-49 years      | 1.01 | 0.99 | 1.04 | 0 |
| 16 | Papua New Guinea   | Male   | 50-69 years      | 0.89 | 0.85 | 0.92 | 0 |
| 17 | Papua New Guinea   | Male   | 70+ years        | 0.79 | 0.75 | 0.83 | 0 |
| 18 | Papua New Guinea   | Male   | Age-standardized | 0.9  | 0.87 | 0.93 | 0 |
| 19 | Papua New Guinea   | Female | All Ages         | 1.53 | 1.5  | 1.57 | 0 |
| 20 | Papua New Guinea   | Female | 15-49 years      | 1.31 | 1.27 | 1.36 | 0 |
| 21 | Papua New Guinea   | Female | 50-69 years      | 1.21 | 1.16 | 1.25 | 0 |
| 22 | Papua New Guinea   | Female | 70+ years        | 1.02 | 0.96 | 1.08 | 0 |
| 23 | Papua New Guinea   | Female | Age-standardized | 1.17 | 1.13 | 1.22 | 0 |
| 24 | Papua New Guinea   | Both   | All Ages         | 1.39 | 1.34 | 1.43 | 0 |
| 25 | Papua New Guinea   | Both   | 15-49 years      | 1.15 | 1.12 | 1.18 | 0 |
| 26 | Papua New Guinea   | Both   | 50-69 years      | 1.03 | 1    | 1.07 | 0 |
| 27 | Papua New Guinea   | Both   | 70+ years        | 0.91 | 0.86 | 0.95 | 0 |
| 28 | Ukraine            | Both   | Age-standardized | 0.73 | 0.65 | 0.82 | 0 |
| 29 | Yemen              | Male   | All Ages         | 2.02 | 1.96 | 2.08 | 0 |
| 30 | Yemen              | Male   | 15-49 years      | 1.37 | 1.25 | 1.49 | 0 |
| 31 | Yemen              | Male   | 50-69 years      | 1.2  | 1.17 | 1.23 | 0 |
| 32 | Yemen              | Male   | 70+ years        | 1    | 0.98 | 1.02 | 0 |
| 33 | Yemen              | Male   | Age-standardized | 1.17 | 1.14 | 1.19 | 0 |
| 34 | Yemen              | Female | All Ages         | 2.02 | 1.93 | 2.12 | 0 |
| 35 | Yemen              | Female | 15-49 years      | 1.4  | 1.28 | 1.51 | 0 |
| 36 | Yemen              | Female | 50-69 years      | 1.23 | 1.2  | 1.25 | 0 |
| 37 | Yemen              | Female | 70+ years        | 1.13 | 1.11 | 1.16 | 0 |
| 38 | Yemen              | Female | Age-standardized | 1.25 | 1.22 | 1.28 | 0 |
| 39 | Yemen              | Both   | All Ages         | 2.01 | 1.94 | 2.08 | 0 |
| 40 | Yemen              | Both   | 15-49 years      | 1.38 | 1.27 | 1.49 | 0 |
| 41 | Yemen              | Both   | 50-69 years      | 1.16 | 1.14 | 1.18 | 0 |
| 42 | Yemen              | Both   | 70+ years        | 1.13 | 1.11 | 1.16 | 0 |
| 43 | Russian Federation | Both   | Age-standardized | 0.73 | 0.64 | 0.81 | 0 |
| 44 | Mexico             | Male   | All Ages         | 2.25 | 2.17 | 2.34 | 0 |
| 45 | Mexico             | Male   | 15-49 years      | 1.53 | 1.43 | 1.62 | 0 |
| 46 | Mexico             | Male   | 50-69 years      | 1.05 | 0.97 | 1.13 | 0 |
| 47 | Mexico             | Male   | 70+ years        | 0.76 | 0.7  | 0.83 | 0 |
| 48 | Mexico             | Male   | Age-standardized | 1.1  | 1.03 | 1.18 | 0 |
| 49 | Mexico             | Female | All Ages         | 2.33 | 2.26 | 2.4  | 0 |
| 50 | Mexico             | Female | 15-49 years      | 1.52 | 1.45 | 1.59 | 0 |
| 51 | Mexico             | Female | 50-69 years      | 1.07 | 1.02 | 1.12 | 0 |
| 52 | Mexico             | Female | 70+ years        | 1.03 | 0.95 | 1.1  | 0 |
| 53 | Mexico             | Female | Age-standardized | 1.08 | 1.02 | 1.13 | 0 |
| 54 | Mexico             | Both   | All Ages         | 2.28 | 2.22 | 2.34 | 0 |
| 55 | Mexico             | Both   | 15-49 years      | 1.53 | 1.46 | 1.59 | 0 |
| 56 | Mexico             | Both   | 50-69 years      | 1.04 | 0.99 | 1.1  | 0 |
| 57 | Mexico             | Both   | 70+ years        | 0.86 | 0.8  | 0.92 | 0 |

|    |                     |        |                  |      |      |      |   |
|----|---------------------|--------|------------------|------|------|------|---|
| 1  |                     |        |                  |      |      |      |   |
| 2  | India               | Both   | Age-standardized | 0.72 | 0.71 | 0.74 | 0 |
| 3  | Greece              | Male   | All Ages         | 1.57 | 1.39 | 1.75 | 0 |
| 4  | Greece              | Male   | 15-49 years      | 1.43 | 1.28 | 1.58 | 0 |
| 5  | Greece              | Male   | 50-69 years      | 1    | 0.85 | 1.16 | 0 |
| 6  | Greece              | Male   | 70+ years        | 0.73 | 0.57 | 0.89 | 0 |
| 7  | Greece              | Male   | Age-standardized | 1.04 | 0.89 | 1.19 | 0 |
| 8  | Greece              | Female | All Ages         | 1.92 | 1.73 | 2.11 | 0 |
| 9  | Greece              | Female | 15-49 years      | 1.57 | 1.41 | 1.74 | 0 |
| 10 | Greece              | Female | 50-69 years      | 1.24 | 1.05 | 1.42 | 0 |
| 11 | Greece              | Female | 70+ years        | 1.2  | 1.01 | 1.39 | 0 |
| 12 | Greece              | Female | Age-standardized | 1.24 | 1.07 | 1.41 | 0 |
| 13 | Greece              | Both   | All Ages         | 1.69 | 1.51 | 1.88 | 0 |
| 14 | Greece              | Both   | 15-49 years      | 1.48 | 1.32 | 1.65 | 0 |
| 15 | Greece              | Both   | 50-69 years      | 1.1  | 0.94 | 1.26 | 0 |
| 16 | Greece              | Both   | 70+ years        | 0.96 | 0.78 | 1.14 | 0 |
| 17 | Canada              | Both   | Age-standardized | 0.72 | 0.64 | 0.8  | 0 |
| 18 | Sri Lanka           | Male   | All Ages         | 1.75 | 1.68 | 1.82 | 0 |
| 19 | Sri Lanka           | Male   | 15-49 years      | 1.15 | 1.07 | 1.23 | 0 |
| 20 | Sri Lanka           | Male   | 50-69 years      | 0.92 | 0.85 | 1    | 0 |
| 21 | Sri Lanka           | Male   | 70+ years        | 0.79 | 0.72 | 0.85 | 0 |
| 22 | Sri Lanka           | Male   | Age-standardized | 0.9  | 0.83 | 0.97 | 0 |
| 23 | Sri Lanka           | Female | All Ages         | 1.95 | 1.9  | 2    | 0 |
| 24 | Sri Lanka           | Female | 15-49 years      | 1.11 | 1.07 | 1.14 | 0 |
| 25 | Sri Lanka           | Female | 50-69 years      | 0.93 | 0.89 | 0.96 | 0 |
| 26 | Sri Lanka           | Female | 70+ years        | 0.71 | 0.7  | 0.73 | 0 |
| 27 | Sri Lanka           | Female | Age-standardized | 0.83 | 0.8  | 0.86 | 0 |
| 28 | Sri Lanka           | Both   | All Ages         | 1.82 | 1.77 | 1.88 | 0 |
| 29 | Sri Lanka           | Both   | 15-49 years      | 1.12 | 1.06 | 1.17 | 0 |
| 30 | Sri Lanka           | Both   | 50-69 years      | 0.9  | 0.85 | 0.95 | 0 |
| 31 | Sri Lanka           | Both   | 70+ years        | 0.66 | 0.63 | 0.69 | 0 |
| 32 | Kenya               | Both   | Age-standardized | 0.72 | 0.68 | 0.76 | 0 |
| 33 | Algeria             | Male   | All Ages         | 2.9  | 2.79 | 3    | 0 |
| 34 | Algeria             | Male   | 15-49 years      | 1.9  | 1.75 | 2.06 | 0 |
| 35 | Algeria             | Male   | 50-69 years      | 1.28 | 1.18 | 1.38 | 0 |
| 36 | Algeria             | Male   | 70+ years        | 1.03 | 0.93 | 1.13 | 0 |
| 37 | Algeria             | Male   | Age-standardized | 1.32 | 1.22 | 1.42 | 0 |
| 38 | Algeria             | Female | All Ages         | 2.79 | 2.71 | 2.86 | 0 |
| 39 | Algeria             | Female | 15-49 years      | 1.86 | 1.74 | 1.99 | 0 |
| 40 | Algeria             | Female | 50-69 years      | 1.24 | 1.19 | 1.29 | 0 |
| 41 | Algeria             | Female | 70+ years        | 1.05 | 0.98 | 1.12 | 0 |
| 42 | Algeria             | Female | Age-standardized | 1.27 | 1.21 | 1.32 | 0 |
| 43 | Algeria             | Both   | All Ages         | 2.85 | 2.76 | 2.95 | 0 |
| 44 | Algeria             | Both   | 15-49 years      | 1.88 | 1.74 | 2.02 | 0 |
| 45 | Algeria             | Both   | 50-69 years      | 1.31 | 1.24 | 1.38 | 0 |
| 46 | Algeria             | Both   | 70+ years        | 1.06 | 0.96 | 1.16 | 0 |
| 47 | North Korea         | Both   | Age-standardized | 0.71 | 0.68 | 0.74 | 0 |
| 48 | Trinidad and Tobago | Male   | All Ages         | 2.39 | 2.28 | 2.5  | 0 |
| 49 | Trinidad and Tobago | Male   | 15-49 years      | 1.52 | 1.47 | 1.57 | 0 |
| 50 | Trinidad and Tobago | Male   | 50-69 years      | 1.01 | 0.97 | 1.06 | 0 |
| 51 | Trinidad and Tobago | Male   | 70+ years        | 0.74 | 0.7  | 0.77 | 0 |
| 52 | Trinidad and Tobago | Male   | Age-standardized | 1.1  | 1.05 | 1.15 | 0 |
| 53 | Trinidad and Tobago | Female | All Ages         | 2.56 | 2.46 | 2.67 | 0 |
| 54 | Trinidad and Tobago | Female | 15-49 years      | 1.56 | 1.49 | 1.63 | 0 |
| 55 | Trinidad and Tobago | Female | 50-69 years      | 1.18 | 1.1  | 1.25 | 0 |
| 56 | Trinidad and Tobago | Female | 70+ years        | 1.04 | 0.97 | 1.12 | 0 |
| 57 | Trinidad and Tobago | Female | Age-standardized | 1.2  | 1.13 | 1.28 | 0 |

|    |                     |        |                  |      |      |      |   |
|----|---------------------|--------|------------------|------|------|------|---|
| 1  |                     |        |                  |      |      |      |   |
| 2  | Trinidad and Tobago | Both   | All Ages         | 2.46 | 2.35 | 2.56 | 0 |
| 3  | Trinidad and Tobago | Both   | 15-49 years      | 1.54 | 1.49 | 1.6  | 0 |
| 4  | Trinidad and Tobago | Both   | 50-69 years      | 1.1  | 1.04 | 1.15 | 0 |
| 5  | Trinidad and Tobago | Both   | 70+ years        | 0.85 | 0.81 | 0.89 | 0 |
| 6  | Niger               | Both   | Age-standardized | 0.71 | 0.65 | 0.76 | 0 |
| 7  | Djibouti            | Male   | All Ages         | 2.4  | 2.35 | 2.46 | 0 |
| 8  | Djibouti            | Male   | 15-49 years      | 1.71 | 1.65 | 1.76 | 0 |
| 9  | Djibouti            | Male   | 50-69 years      | 1.28 | 1.23 | 1.34 | 0 |
| 10 | Djibouti            | Male   | 70+ years        | 1.26 | 1.21 | 1.31 | 0 |
| 11 | Djibouti            | Male   | Age-standardized | 1.32 | 1.27 | 1.38 | 0 |
| 12 | Djibouti            | Female | All Ages         | 2.42 | 2.3  | 2.55 | 0 |
| 13 | Djibouti            | Female | 15-49 years      | 1.62 | 1.47 | 1.76 | 0 |
| 14 | Djibouti            | Female | 50-69 years      | 1.13 | 1.03 | 1.22 | 0 |
| 15 | Djibouti            | Female | 70+ years        | 1.27 | 1.18 | 1.35 | 0 |
| 16 | Djibouti            | Female | Age-standardized | 1.19 | 1.1  | 1.28 | 0 |
| 17 | Djibouti            | Both   | All Ages         | 2.4  | 2.33 | 2.47 | 0 |
| 18 | Djibouti            | Both   | 15-49 years      | 1.62 | 1.55 | 1.7  | 0 |
| 19 | Djibouti            | Both   | 50-69 years      | 1.3  | 1.23 | 1.37 | 0 |
| 20 | Djibouti            | Both   | 70+ years        | 1.3  | 1.25 | 1.34 | 0 |
| 21 | Djibouti            | Both   | Age-standardized | 0.71 | 0.63 | 0.8  | 0 |
| 22 | Philippines         | Both   | All Ages         | 1.41 | 1.39 | 1.44 | 0 |
| 23 | Swaziland           | Male   | 15-49 years      | 0.69 | 0.65 | 0.73 | 0 |
| 24 | Swaziland           | Male   | 50-69 years      | 0.47 | 0.46 | 0.49 | 0 |
| 25 | Swaziland           | Male   | 70+ years        | 0.45 | 0.43 | 0.47 | 0 |
| 26 | Swaziland           | Male   | Age-standardized | 0.48 | 0.47 | 0.5  | 0 |
| 27 | Swaziland           | Female | All Ages         | 1.28 | 1.23 | 1.34 | 0 |
| 28 | Swaziland           | Female | 15-49 years      | 0.48 | 0.43 | 0.54 | 0 |
| 29 | Swaziland           | Female | 50-69 years      | 0.39 | 0.34 | 0.43 | 0 |
| 30 | Swaziland           | Female | 70+ years        | 0.49 | 0.45 | 0.54 | 0 |
| 31 | Swaziland           | Female | Age-standardized | 0.4  | 0.35 | 0.45 | 0 |
| 32 | Swaziland           | Both   | All Ages         | 1.38 | 1.35 | 1.42 | 0 |
| 33 | Swaziland           | Both   | 15-49 years      | 0.68 | 0.63 | 0.72 | 0 |
| 34 | Swaziland           | Both   | 50-69 years      | 0.34 | 0.31 | 0.36 | 0 |
| 35 | Swaziland           | Both   | 70+ years        | 0.38 | 0.36 | 0.4  | 0 |
| 36 | Swaziland           | Both   | Age-standardized | 0.7  | 0.65 | 0.74 | 0 |
| 37 | South Africa        | Both   | All Ages         | 2.49 | 2.41 | 2.57 | 0 |
| 38 | Turkmenistan        | Male   | 15-49 years      | 1.65 | 1.57 | 1.73 | 0 |
| 39 | Turkmenistan        | Male   | 50-69 years      | 0.81 | 0.73 | 0.88 | 0 |
| 40 | Turkmenistan        | Male   | 70+ years        | 1.25 | 1.21 | 1.29 | 0 |
| 41 | Turkmenistan        | Male   | Age-standardized | 1.2  | 1.15 | 1.26 | 0 |
| 42 | Turkmenistan        | Female | All Ages         | 2.41 | 2.32 | 2.51 | 0 |
| 43 | Turkmenistan        | Female | 15-49 years      | 1.57 | 1.51 | 1.64 | 0 |
| 44 | Turkmenistan        | Female | 50-69 years      | 0.93 | 0.87 | 0.99 | 0 |
| 45 | Turkmenistan        | Female | 70+ years        | 1.57 | 1.49 | 1.64 | 0 |
| 46 | Turkmenistan        | Female | Age-standardized | 1.31 | 1.23 | 1.4  | 0 |
| 47 | Turkmenistan        | Both   | All Ages         | 2.47 | 2.39 | 2.56 | 0 |
| 48 | Turkmenistan        | Both   | 15-49 years      | 1.66 | 1.59 | 1.74 | 0 |
| 49 | Turkmenistan        | Both   | 50-69 years      | 0.86 | 0.79 | 0.92 | 0 |
| 50 | Turkmenistan        | Both   | 70+ years        | 1.54 | 1.49 | 1.6  | 0 |
| 51 | Tanzania            | Both   | Age-standardized | 0.69 | 0.65 | 0.72 | 0 |
| 52 | Barbados            | Male   | All Ages         | 1.62 | 1.57 | 1.67 | 0 |
| 53 | Barbados            | Male   | 15-49 years      | 1.19 | 1.08 | 1.31 | 0 |
| 54 | Barbados            | Male   | 50-69 years      | 0.78 | 0.75 | 0.81 | 0 |
| 55 | Barbados            | Male   | 70+ years        | 0.63 | 0.59 | 0.66 | 0 |
| 56 | Barbados            | Male   | Age-standardized | 0.86 | 0.81 | 0.91 | 0 |
| 57 | Barbados            | Female | All Ages         | 1.32 | 1.24 | 1.39 | 0 |



|    |            |        |                  |      |      |      |   |
|----|------------|--------|------------------|------|------|------|---|
| 1  |            |        |                  |      |      |      |   |
| 2  | Barbados   | Female | 15-49 years      | 0.93 | 0.78 | 1.08 | 0 |
| 3  | Barbados   | Female | 50-69 years      | 0.54 | 0.48 | 0.61 | 0 |
| 4  | Barbados   | Female | 70+ years        | 0.52 | 0.43 | 0.61 | 0 |
| 5  | Barbados   | Female | Age-standardized | 0.61 | 0.53 | 0.69 | 0 |
| 6  | Barbados   | Both   | All Ages         | 1.49 | 1.43 | 1.55 | 0 |
| 7  | Barbados   | Both   | 15-49 years      | 1.08 | 0.95 | 1.21 | 0 |
| 8  | Barbados   | Both   | 50-69 years      | 0.7  | 0.65 | 0.76 | 0 |
| 9  | Barbados   | Both   | 70+ years        | 0.61 | 0.55 | 0.66 | 0 |
| 10 | Chad       | Both   | Age-standardized | 0.69 | 0.67 | 0.71 | 0 |
| 11 | Senegal    | Male   | All Ages         | 1.03 | 0.91 | 1.14 | 0 |
| 12 | Senegal    | Male   | 15-49 years      | 0.7  | 0.63 | 0.78 | 0 |
| 13 | Senegal    | Male   | 50-69 years      | 0.58 | 0.52 | 0.64 | 0 |
| 14 | Senegal    | Male   | 70+ years        | 0.57 | 0.48 | 0.66 | 0 |
| 15 | Senegal    | Male   | Age-standardized | 0.63 | 0.55 | 0.7  | 0 |
| 16 | Senegal    | Female | All Ages         | 0.88 | 0.75 | 1.01 | 0 |
| 17 | Senegal    | Female | 15-49 years      | 0.42 | 0.31 | 0.53 | 0 |
| 18 | Senegal    | Female | 50-69 years      | 0.24 | 0.14 | 0.35 | 0 |
| 19 | Senegal    | Female | 70+ years        | 0.32 | 0.21 | 0.42 | 0 |
| 20 | Senegal    | Female | Age-standardized | 0.29 | 0.18 | 0.4  | 0 |
| 21 | Senegal    | Both   | All Ages         | 1    | 0.87 | 1.12 | 0 |
| 22 | Senegal    | Both   | 15-49 years      | 0.62 | 0.54 | 0.71 | 0 |
| 23 | Senegal    | Both   | 50-69 years      | 0.42 | 0.35 | 0.49 | 0 |
| 24 | Senegal    | Both   | 70+ years        | 0.4  | 0.3  | 0.49 | 0 |
| 25 | Latvia     | Both   | Age-standardized | 0.68 | 0.59 | 0.78 | 0 |
| 26 | Eritrea    | Male   | All Ages         | 1.17 | 1.08 | 1.25 | 0 |
| 27 | Eritrea    | Male   | 15-49 years      | 0.69 | 0.65 | 0.74 | 0 |
| 28 | Eritrea    | Male   | 50-69 years      | 0.48 | 0.43 | 0.53 | 0 |
| 29 | Eritrea    | Male   | 70+ years        | 0.56 | 0.52 | 0.6  | 0 |
| 30 | Eritrea    | Male   | Age-standardized | 0.54 | 0.49 | 0.58 | 0 |
| 31 | Eritrea    | Female | All Ages         | 0.83 | 0.72 | 0.94 | 0 |
| 32 | Eritrea    | Female | 15-49 years      | 0.38 | 0.34 | 0.42 | 0 |
| 33 | Eritrea    | Female | 50-69 years      | 0.26 | 0.22 | 0.3  | 0 |
| 34 | Eritrea    | Female | 70+ years        | 0.42 | 0.38 | 0.47 | 0 |
| 35 | Eritrea    | Female | Age-standardized | 0.33 | 0.29 | 0.37 | 0 |
| 36 | Eritrea    | Both   | All Ages         | 1.03 | 0.93 | 1.12 | 0 |
| 37 | Eritrea    | Both   | 15-49 years      | 0.59 | 0.55 | 0.63 | 0 |
| 38 | Eritrea    | Both   | 50-69 years      | 0.34 | 0.3  | 0.37 | 0 |
| 39 | Eritrea    | Both   | 70+ years        | 0.4  | 0.36 | 0.43 | 0 |
| 40 | Tajikistan | Both   | Age-standardized | 0.67 | 0.58 | 0.76 | 0 |
| 41 | Singapore  | Male   | All Ages         | 1.77 | 1.72 | 1.81 | 0 |
| 42 | Singapore  | Male   | 15-49 years      | 1.21 | 1.1  | 1.33 | 0 |
| 43 | Singapore  | Male   | 50-69 years      | 0.96 | 0.88 | 1.04 | 0 |
| 44 | Singapore  | Male   | 70+ years        | 0.69 | 0.62 | 0.76 | 0 |
| 45 | Singapore  | Male   | Age-standardized | 0.97 | 0.89 | 1.06 | 0 |
| 46 | Singapore  | Female | All Ages         | 1.92 | 1.85 | 1.99 | 0 |
| 47 | Singapore  | Female | 15-49 years      | 1.29 | 1.13 | 1.46 | 0 |
| 48 | Singapore  | Female | 50-69 years      | 1.25 | 1.14 | 1.35 | 0 |
| 49 | Singapore  | Female | 70+ years        | 1.06 | 0.97 | 1.16 | 0 |
| 50 | Singapore  | Female | Age-standardized | 1.23 | 1.1  | 1.35 | 0 |
| 51 | Singapore  | Both   | All Ages         | 1.73 | 1.67 | 1.79 | 0 |
| 52 | Singapore  | Both   | 15-49 years      | 1.13 | 0.99 | 1.27 | 0 |
| 53 | Singapore  | Both   | 50-69 years      | 1.07 | 0.98 | 1.16 | 0 |
| 54 | Singapore  | Both   | 70+ years        | 0.88 | 0.8  | 0.96 | 0 |
| 55 | Ethiopia   | Both   | Age-standardized | 0.66 | 0.64 | 0.68 | 0 |
| 56 | Uruguay    | Male   | All Ages         | 1.53 | 1.48 | 1.58 | 0 |
| 57 | Uruguay    | Male   | 15-49 years      | 1.33 | 1.3  | 1.36 | 0 |



|    |                       |        |                  |      |      |      |       |
|----|-----------------------|--------|------------------|------|------|------|-------|
| 1  |                       |        |                  |      |      |      |       |
| 2  | Uruguay               | Male   | 50-69 years      | 1.13 | 1.1  | 1.15 | 0     |
| 3  | Uruguay               | Male   | 70+ years        | 0.84 | 0.81 | 0.88 | 0     |
| 4  | Uruguay               | Male   | Age-standardized | 1.18 | 1.14 | 1.21 | 0     |
| 5  | Uruguay               | Female | All Ages         | 1.73 | 1.64 | 1.81 | 0     |
| 6  | Uruguay               | Female | 15-49 years      | 1.39 | 1.33 | 1.46 | 0     |
| 7  | Uruguay               | Female | 50-69 years      | 1.24 | 1.19 | 1.3  | 0     |
| 8  | Uruguay               | Female | 70+ years        | 1.11 | 1.04 | 1.18 | 0     |
| 9  | Uruguay               | Female | Age-standardized | 1.27 | 1.21 | 1.34 | 0     |
| 10 | Uruguay               | Both   | All Ages         | 1.61 | 1.54 | 1.67 | 0     |
| 11 | Uruguay               | Both   | 15-49 years      | 1.35 | 1.31 | 1.39 | 0     |
| 12 | Uruguay               | Both   | 50-69 years      | 1.18 | 1.14 | 1.22 | 0     |
| 13 | Uruguay               | Both   | 70+ years        | 0.98 | 0.93 | 1.03 | 0     |
| 14 | Uruguay               | Both   | Age-standardized | 0.66 | 0.59 | 0.73 | 0     |
| 15 | Serbia                | Both   | All Ages         | 1.36 | 1.2  | 1.52 | 0     |
| 16 | Tajikistan            | Male   | 15-49 years      | 0.82 | 0.7  | 0.94 | 0     |
| 17 | Tajikistan            | Male   | 50-69 years      | 0.14 | 0.03 | 0.24 | 0.013 |
| 18 | Tajikistan            | Male   | 70+ years        | 0.75 | 0.73 | 0.77 | 0     |
| 19 | Tajikistan            | Male   | Age-standardized | 0.56 | 0.48 | 0.65 | 0     |
| 20 | Tajikistan            | Female | All Ages         | 1.3  | 1.1  | 1.49 | 0     |
| 21 | Tajikistan            | Female | 15-49 years      | 0.86 | 0.77 | 0.95 | 0     |
| 22 | Tajikistan            | Female | 50-69 years      | 0.29 | 0.19 | 0.4  | 0     |
| 23 | Tajikistan            | Female | 70+ years        | 1.02 | 0.92 | 1.12 | 0     |
| 24 | Tajikistan            | Female | Age-standardized | 0.75 | 0.66 | 0.84 | 0     |
| 25 | Tajikistan            | Both   | All Ages         | 1.34 | 1.17 | 1.52 | 0     |
| 26 | Tajikistan            | Both   | 15-49 years      | 0.84 | 0.74 | 0.95 | 0     |
| 27 | Tajikistan            | Both   | 50-69 years      | 0.21 | 0.1  | 0.32 | 0.001 |
| 28 | Tajikistan            | Both   | 70+ years        | 1.03 | 0.98 | 1.08 | 0     |
| 29 | Cameroon              | Both   | Age-standardized | 0.66 | 0.63 | 0.68 | 0     |
| 30 | Sao Tome and Principe | Male   | All Ages         | 1.58 | 1.49 | 1.67 | 0     |
| 31 | Sao Tome and Principe | Male   | 15-49 years      | 1.29 | 1.23 | 1.34 | 0     |
| 32 | Sao Tome and Principe | Male   | 50-69 years      | 0.74 | 0.71 | 0.78 | 0     |
| 33 | Sao Tome and Principe | Male   | 70+ years        | 0.82 | 0.78 | 0.87 | 0     |
| 34 | Sao Tome and Principe | Male   | Age-standardized | 0.85 | 0.81 | 0.88 | 0     |
| 35 | Sao Tome and Principe | Female | All Ages         | 1.12 | 1.1  | 1.14 | 0     |
| 36 | Sao Tome and Principe | Female | 15-49 years      | 0.88 | 0.85 | 0.91 | 0     |
| 37 | Sao Tome and Principe | Female | 50-69 years      | 0.48 | 0.42 | 0.53 | 0     |
| 38 | Sao Tome and Principe | Female | 70+ years        | 0.76 | 0.7  | 0.83 | 0     |
| 39 | Sao Tome and Principe | Female | Age-standardized | 0.59 | 0.54 | 0.65 | 0     |
| 40 | Sao Tome and Principe | Both   | All Ages         | 1.41 | 1.35 | 1.48 | 0     |
| 41 | Sao Tome and Principe | Both   | 15-49 years      | 1.17 | 1.13 | 1.21 | 0     |
| 42 | Sao Tome and Principe | Both   | 50-69 years      | 0.63 | 0.61 | 0.66 | 0     |
| 43 | Sao Tome and Principe | Both   | 70+ years        | 0.78 | 0.71 | 0.85 | 0     |
| 44 | The Bahamas           | Both   | Age-standardized | 0.66 | 0.6  | 0.73 | 0     |
| 45 | Norway                | Male   | All Ages         | 1.17 | 1.07 | 1.27 | 0     |
| 46 | Norway                | Male   | 15-49 years      | 1.08 | 0.92 | 1.24 | 0     |
| 47 | Norway                | Male   | 50-69 years      | 0.95 | 0.85 | 1.05 | 0     |
| 48 | Norway                | Male   | 70+ years        | 0.64 | 0.55 | 0.73 | 0     |
| 49 | Norway                | Male   | Age-standardized | 0.97 | 0.86 | 1.09 | 0     |
| 50 | Norway                | Female | All Ages         | 1.32 | 1.19 | 1.44 | 0     |
| 51 | Norway                | Female | 15-49 years      | 1.33 | 1.16 | 1.5  | 0     |
| 52 | Norway                | Female | 50-69 years      | 1.25 | 1.13 | 1.36 | 0     |
| 53 | Norway                | Female | 70+ years        | 1.04 | 0.9  | 1.18 | 0     |
| 54 | Norway                | Female | Age-standardized | 1.26 | 1.12 | 1.39 | 0     |
| 55 | Norway                | Both   | All Ages         | 1.24 | 1.14 | 1.35 | 0     |
| 56 | Norway                | Both   | 15-49 years      | 1.16 | 1    | 1.31 | 0     |
| 57 | Norway                | Both   | 50-69 years      | 1.1  | 0.99 | 1.22 | 0     |

|    |                                  |        |                  |      |      |      |       |
|----|----------------------------------|--------|------------------|------|------|------|-------|
| 1  |                                  |        |                  |      |      |      |       |
| 2  | Norway                           | Both   | 70+ years        | 0.92 | 0.82 | 1.01 | 0     |
| 3  | Zimbabwe                         | Both   | Age-standardized | 0.66 | 0.62 | 0.7  | 0     |
| 4  | Kuwait                           | Male   | All Ages         | 1.67 | 1.64 | 1.7  | 0     |
| 5  | Kuwait                           | Male   | 15-49 years      | 1.27 | 1.25 | 1.3  | 0     |
| 6  | Kuwait                           | Male   | 50-69 years      | 0.85 | 0.84 | 0.86 | 0     |
| 7  | Kuwait                           | Male   | 70+ years        | 0.63 | 0.6  | 0.67 | 0     |
| 8  | Kuwait                           | Male   | Age-standardized | 0.95 | 0.94 | 0.97 | 0     |
| 9  | Kuwait                           | Female | All Ages         | 2.42 | 2.36 | 2.47 | 0     |
| 10 | Kuwait                           | Female | 15-49 years      | 1.69 | 1.64 | 1.73 | 0     |
| 11 | Kuwait                           | Female | 50-69 years      | 1.13 | 1.08 | 1.19 | 0     |
| 12 | Kuwait                           | Female | 70+ years        | 1    | 0.93 | 1.07 | 0     |
| 13 | Kuwait                           | Female | Age-standardized | 1.18 | 1.13 | 1.23 | 0     |
| 14 | Kuwait                           | Both   | All Ages         | 1.86 | 1.81 | 1.9  | 0     |
| 15 | Kuwait                           | Both   | 15-49 years      | 1.32 | 1.29 | 1.36 | 0     |
| 16 | Kuwait                           | Both   | 50-69 years      | 0.86 | 0.84 | 0.88 | 0     |
| 17 | Kuwait                           | Both   | 70+ years        | 0.81 | 0.74 | 0.88 | 0     |
| 18 | Timor-Leste                      | Both   | Age-standardized | 0.65 | 0.62 | 0.68 | 0     |
| 19 | Turkey                           | Male   | All Ages         | 2.17 | 2.09 | 2.24 | 0     |
| 20 | Turkey                           | Male   | 15-49 years      | 1.44 | 1.36 | 1.52 | 0     |
| 21 | Turkey                           | Male   | 50-69 years      | 0.95 | 0.89 | 1.01 | 0     |
| 22 | Turkey                           | Male   | 70+ years        | 0.82 | 0.74 | 0.9  | 0     |
| 23 | Turkey                           | Male   | Age-standardized | 1    | 0.93 | 1.06 | 0     |
| 24 | Turkey                           | Female | All Ages         | 2.24 | 2.15 | 2.33 | 0     |
| 25 | Turkey                           | Female | 15-49 years      | 1.49 | 1.4  | 1.57 | 0     |
| 26 | Turkey                           | Female | 50-69 years      | 1.01 | 0.95 | 1.07 | 0     |
| 27 | Turkey                           | Female | 70+ years        | 0.87 | 0.77 | 0.98 | 0     |
| 28 | Turkey                           | Female | Age-standardized | 1.02 | 0.96 | 1.09 | 0     |
| 29 | Turkey                           | Both   | All Ages         | 2.18 | 2.1  | 2.27 | 0     |
| 30 | Turkey                           | Both   | 15-49 years      | 1.46 | 1.38 | 1.54 | 0     |
| 31 | Turkey                           | Both   | 50-69 years      | 0.98 | 0.93 | 1.04 | 0     |
| 32 | Turkey                           | Both   | 70+ years        | 0.79 | 0.7  | 0.88 | 0     |
| 33 | Japan                            | Both   | Age-standardized | 0.64 | 0.6  | 0.68 | 0     |
| 34 | Russian Federation               | Male   | All Ages         | 1.08 | 1.06 | 1.1  | 0     |
| 35 | Russian Federation               | Male   | 15-49 years      | 0.73 | 0.59 | 0.87 | 0     |
| 36 | Russian Federation               | Male   | 50-69 years      | 0.14 | 0.02 | 0.27 | 0.024 |
| 37 | Russian Federation               | Male   | 70+ years        | 0.26 | 0.23 | 0.29 | 0     |
| 38 | Russian Federation               | Male   | Age-standardized | 0.44 | 0.35 | 0.52 | 0     |
| 39 | Russian Federation               | Female | All Ages         | 1.62 | 1.55 | 1.69 | 0     |
| 40 | Russian Federation               | Female | 15-49 years      | 1.21 | 1.1  | 1.32 | 0     |
| 41 | Russian Federation               | Female | 50-69 years      | 0.73 | 0.61 | 0.85 | 0     |
| 42 | Russian Federation               | Female | 70+ years        | 1.22 | 1.12 | 1.32 | 0     |
| 43 | Russian Federation               | Female | Age-standardized | 1.08 | 0.98 | 1.18 | 0     |
| 44 | Russian Federation               | Both   | All Ages         | 1.28 | 1.24 | 1.32 | 0     |
| 45 | Russian Federation               | Both   | 15-49 years      | 0.85 | 0.72 | 0.99 | 0     |
| 46 | Russian Federation               | Both   | 50-69 years      | 0.42 | 0.3  | 0.53 | 0     |
| 47 | Russian Federation               | Both   | 70+ years        | 1    | 0.94 | 1.06 | 0     |
| 48 | Congo                            | Both   | Age-standardized | 0.64 | 0.61 | 0.67 | 0     |
| 49 | Democratic Republic of the Congo | Male   | All Ages         | 0.44 | 0.35 | 0.54 | 0     |
| 50 | Democratic Republic of the Congo | Male   | 15-49 years      | 0.3  | 0.24 | 0.36 | 0     |
| 51 | Democratic Republic of the Congo | Male   | 50-69 years      | 0.15 | 0.08 | 0.22 | 0     |
| 52 | Democratic Republic of the Congo | Male   | 70+ years        | 0.18 | 0.11 | 0.25 | 0     |
| 53 | Democratic Republic of the Congo | Male   | Age-standardized | 0.21 | 0.14 | 0.27 | 0     |
| 54 | Democratic Republic of the Congo | Female | All Ages         | 0.45 | 0.33 | 0.56 | 0     |
| 55 | Democratic Republic of the Congo | Female | 15-49 years      | 0.34 | 0.24 | 0.44 | 0     |
| 56 | Democratic Republic of the Congo | Female | 50-69 years      | 0.29 | 0.18 | 0.4  | 0     |
| 57 | Democratic Republic of the Congo | Female | 70+ years        | 0.44 | 0.34 | 0.55 | 0     |

|    |                                    |                  |                  |      |      |       |   |
|----|------------------------------------|------------------|------------------|------|------|-------|---|
| 1  |                                    |                  |                  |      |      |       |   |
| 2  | Democratic Republic of the (Female | Age-standardized | 0.36             | 0.25 | 0.46 | 0     |   |
| 3  | Democratic Republic of the (Both   | All Ages         | 0.46             | 0.35 | 0.56 | 0     |   |
| 4  | Democratic Republic of the (Both   | 15-49 years      | 0.34             | 0.26 | 0.41 | 0     |   |
| 5  | Democratic Republic of the (Both   | 50-69 years      | 0.26             | 0.16 | 0.35 | 0     |   |
| 6  | Democratic Republic of the (Both   | 70+ years        | 0.15             | 0.04 | 0.26 | 0.008 |   |
| 7  | Belarus                            | Both             | Age-standardized | 0.61 | 0.51 | 0.72  | 0 |
| 8  | Croatia                            | Male             | All Ages         | 1.28 | 1.17 | 1.38  | 0 |
| 9  | Croatia                            | Male             | 15-49 years      | 0.84 | 0.77 | 0.9   | 0 |
| 10 | Croatia                            | Male             | 50-69 years      | 0.31 | 0.2  | 0.43  | 0 |
| 11 | Croatia                            | Male             | 70+ years        | 0.54 | 0.38 | 0.69  | 0 |
| 12 | Croatia                            | Male             | Age-standardized | 0.57 | 0.5  | 0.64  | 0 |
| 13 | Croatia                            | Female           | All Ages         | 1.79 | 1.66 | 1.91  | 0 |
| 14 | Croatia                            | Female           | 15-49 years      | 1.09 | 1    | 1.19  | 0 |
| 15 | Croatia                            | Female           | 50-69 years      | 0.97 | 0.86 | 1.08  | 0 |
| 16 | Croatia                            | Female           | 70+ years        | 1.21 | 1.07 | 1.35  | 0 |
| 17 | Croatia                            | Female           | Age-standardized | 1.04 | 0.96 | 1.13  | 0 |
| 18 | Croatia                            | Both             | All Ages         | 1.5  | 1.39 | 1.61  | 0 |
| 19 | Croatia                            | Both             | 15-49 years      | 0.93 | 0.86 | 1     | 0 |
| 20 | Croatia                            | Both             | 50-69 years      | 0.63 | 0.52 | 0.75  | 0 |
| 21 | Croatia                            | Both             | 70+ years        | 0.98 | 0.83 | 1.13  | 0 |
| 22 | Croatia                            | Both             | Age-standardized | 0.59 | 0.46 | 0.73  | 0 |
| 23 | Rwanda                             | Both             | All Ages         | 1.17 | 1.08 | 1.26  | 0 |
| 24 | Angola                             | Male             | 15-49 years      | 1.44 | 1.36 | 1.51  | 0 |
| 25 | Angola                             | Male             | 50-69 years      | 1.32 | 1.25 | 1.4   | 0 |
| 26 | Angola                             | Male             | 70+ years        | 1.3  | 1.24 | 1.37  | 0 |
| 27 | Angola                             | Male             | Age-standardized | 1.38 | 1.3  | 1.46  | 0 |
| 28 | Angola                             | Female           | All Ages         | 1.18 | 1.05 | 1.31  | 0 |
| 29 | Angola                             | Female           | 15-49 years      | 1.17 | 1.06 | 1.28  | 0 |
| 30 | Angola                             | Female           | 50-69 years      | 1.04 | 0.93 | 1.15  | 0 |
| 31 | Angola                             | Female           | 70+ years        | 1.22 | 1.11 | 1.33  | 0 |
| 32 | Angola                             | Female           | Age-standardized | 1.12 | 1.01 | 1.23  | 0 |
| 33 | Angola                             | Both             | All Ages         | 1.14 | 1.03 | 1.25  | 0 |
| 34 | Angola                             | Both             | 15-49 years      | 1.28 | 1.18 | 1.37  | 0 |
| 35 | Angola                             | Both             | 50-69 years      | 1.14 | 1.05 | 1.23  | 0 |
| 36 | Angola                             | Both             | 70+ years        | 1.15 | 1.08 | 1.23  | 0 |
| 37 | Angola                             | Both             | Age-standardized | 0.59 | 0.54 | 0.64  | 0 |
| 38 | Iraq                               | Both             | All Ages         | 0.8  | 0.73 | 0.87  | 0 |
| 39 | Malawi                             | Male             | 15-49 years      | 0.84 | 0.79 | 0.89  | 0 |
| 40 | Malawi                             | Male             | 50-69 years      | 0.75 | 0.7  | 0.79  | 0 |
| 41 | Malawi                             | Male             | 70+ years        | 0.77 | 0.73 | 0.82  | 0 |
| 42 | Malawi                             | Male             | Age-standardized | 0.79 | 0.75 | 0.84  | 0 |
| 43 | Malawi                             | Female           | All Ages         | 0.5  | 0.41 | 0.58  | 0 |
| 44 | Malawi                             | Female           | 15-49 years      | 0.41 | 0.37 | 0.45  | 0 |
| 45 | Malawi                             | Female           | 50-69 years      | 0.31 | 0.29 | 0.34  | 0 |
| 46 | Malawi                             | Female           | 70+ years        | 0.43 | 0.4  | 0.46  | 0 |
| 47 | Malawi                             | Female           | Age-standardized | 0.39 | 0.36 | 0.41  | 0 |
| 48 | Malawi                             | Both             | All Ages         | 0.66 | 0.59 | 0.74  | 0 |
| 49 | Malawi                             | Both             | 15-49 years      | 0.66 | 0.62 | 0.7   | 0 |
| 50 | Malawi                             | Both             | 50-69 years      | 0.51 | 0.48 | 0.54  | 0 |
| 51 | Malawi                             | Both             | 70+ years        | 0.46 | 0.42 | 0.49  | 0 |
| 52 | Malawi                             | Both             | Age-standardized | 0.58 | 0.52 | 0.63  | 0 |
| 53 | Guinea                             | Both             | All Ages         | 1.87 | 1.71 | 2.02  | 0 |
| 54 | Germany                            | Male             | 15-49 years      | 1.53 | 1.36 | 1.7   | 0 |
| 55 | Germany                            | Male             | 50-69 years      | 1.39 | 1.25 | 1.53  | 0 |
| 56 | Germany                            | Male             | 70+ years        | 1.14 | 1.02 | 1.25  | 0 |
| 57 | Germany                            | Male             | Age-standardized | 1.39 | 1.27 | 1.51  | 0 |

|    |                              |        |                  |      |      |      |   |
|----|------------------------------|--------|------------------|------|------|------|---|
| 1  |                              |        |                  |      |      |      |   |
| 2  | Germany                      | Female | All Ages         | 1.81 | 1.7  | 1.91 | 0 |
| 3  | Germany                      | Female | 15-49 years      | 1.52 | 1.4  | 1.64 | 0 |
| 4  | Germany                      | Female | 50-69 years      | 1.4  | 1.28 | 1.52 | 0 |
| 5  | Germany                      | Female | 70+ years        | 1.31 | 1.2  | 1.41 | 0 |
| 6  | Germany                      | Female | Age-standardized | 1.41 | 1.31 | 1.5  | 0 |
| 7  | Germany                      | Both   | All Ages         | 1.87 | 1.73 | 2.01 | 0 |
| 8  | Germany                      | Both   | 15-49 years      | 1.5  | 1.35 | 1.66 | 0 |
| 9  | Germany                      | Both   | 50-69 years      | 1.44 | 1.29 | 1.58 | 0 |
| 10 | Germany                      | Both   | 70+ years        | 1.6  | 1.48 | 1.72 | 0 |
| 11 | Malawi                       | Both   | Age-standardized | 0.58 | 0.55 | 0.62 | 0 |
| 12 | Federated States of Microne: | Male   | All Ages         | 2.16 | 2.07 | 2.25 | 0 |
| 13 | Federated States of Microne: | Male   | 15-49 years      | 1.29 | 1.15 | 1.43 | 0 |
| 14 | Federated States of Microne: | Male   | 50-69 years      | 0.96 | 0.83 | 1.09 | 0 |
| 15 | Federated States of Microne: | Male   | 70+ years        | 0.83 | 0.7  | 0.95 | 0 |
| 16 | Federated States of Microne: | Male   | Age-standardized | 1.06 | 0.92 | 1.2  | 0 |
| 17 | Federated States of Microne: | Female | All Ages         | 2.4  | 2.27 | 2.53 | 0 |
| 18 | Federated States of Microne: | Female | 15-49 years      | 1.54 | 1.37 | 1.72 | 0 |
| 19 | Federated States of Microne: | Female | 50-69 years      | 1.26 | 1.14 | 1.38 | 0 |
| 20 | Federated States of Microne: | Female | 70+ years        | 1.07 | 0.92 | 1.23 | 0 |
| 21 | Federated States of Microne: | Female | Age-standardized | 1.28 | 1.13 | 1.43 | 0 |
| 22 | Federated States of Microne: | Both   | All Ages         | 2.26 | 2.16 | 2.37 | 0 |
| 23 | Federated States of Microne: | Both   | 15-49 years      | 1.4  | 1.25 | 1.55 | 0 |
| 24 | Federated States of Microne: | Both   | 50-69 years      | 1.1  | 0.98 | 1.22 | 0 |
| 25 | Federated States of Microne: | Both   | 70+ years        | 0.9  | 0.76 | 1.03 | 0 |
| 26 | Federated States of Microne: | Both   | Age-standardized | 0.57 | 0.48 | 0.66 | 0 |
| 27 | Kyrgyzstan                   | Both   | Age-standardized | 0.57 | 0.48 | 0.66 | 0 |
| 28 | Guam                         | Male   | All Ages         | 1.64 | 1.55 | 1.74 | 0 |
| 29 | Guam                         | Male   | 15-49 years      | 1.15 | 1.13 | 1.17 | 0 |
| 30 | Guam                         | Male   | 50-69 years      | 0.88 | 0.8  | 0.96 | 0 |
| 31 | Guam                         | Male   | 70+ years        | 0.72 | 0.67 | 0.78 | 0 |
| 32 | Guam                         | Male   | Age-standardized | 0.98 | 0.91 | 1.05 | 0 |
| 33 | Guam                         | Female | All Ages         | 2.22 | 2.13 | 2.32 | 0 |
| 34 | Guam                         | Female | 15-49 years      | 1.43 | 1.38 | 1.49 | 0 |
| 35 | Guam                         | Female | 50-69 years      | 1.42 | 1.32 | 1.51 | 0 |
| 36 | Guam                         | Female | 70+ years        | 1.08 | 1    | 1.16 | 0 |
| 37 | Guam                         | Female | Age-standardized | 1.33 | 1.22 | 1.43 | 0 |
| 38 | Guam                         | Both   | All Ages         | 1.87 | 1.77 | 1.97 | 0 |
| 39 | Guam                         | Both   | 15-49 years      | 1.24 | 1.2  | 1.28 | 0 |
| 40 | Guam                         | Both   | 50-69 years      | 1.11 | 1.01 | 1.2  | 0 |
| 41 | Guam                         | Both   | 70+ years        | 0.89 | 0.84 | 0.95 | 0 |
| 42 | Guam                         | Both   | Age-standardized | 0.55 | 0.53 | 0.58 | 0 |
| 43 | The Gambia                   | Both   | Age-standardized | 0.55 | 0.53 | 0.58 | 0 |
| 44 | Jordan                       | Male   | All Ages         | 2.13 | 2.08 | 2.18 | 0 |
| 45 | Jordan                       | Male   | 15-49 years      | 1.67 | 1.64 | 1.71 | 0 |
| 46 | Jordan                       | Male   | 50-69 years      | 1.01 | 0.99 | 1.03 | 0 |
| 47 | Jordan                       | Male   | 70+ years        | 0.92 | 0.88 | 0.96 | 0 |
| 48 | Jordan                       | Male   | Age-standardized | 1.09 | 1.07 | 1.11 | 0 |
| 49 | Jordan                       | Female | All Ages         | 2.3  | 2.25 | 2.35 | 0 |
| 50 | Jordan                       | Female | 15-49 years      | 1.8  | 1.75 | 1.85 | 0 |
| 51 | Jordan                       | Female | 50-69 years      | 1.27 | 1.23 | 1.31 | 0 |
| 52 | Jordan                       | Female | 70+ years        | 1.19 | 1.14 | 1.23 | 0 |
| 53 | Jordan                       | Female | Age-standardized | 1.28 | 1.24 | 1.32 | 0 |
| 54 | Jordan                       | Both   | All Ages         | 2.21 | 2.17 | 2.25 | 0 |
| 55 | Jordan                       | Both   | 15-49 years      | 1.74 | 1.72 | 1.76 | 0 |
| 56 | Jordan                       | Both   | 50-69 years      | 1.09 | 1.08 | 1.1  | 0 |
| 57 | Jordan                       | Both   | 70+ years        | 1.1  | 1.04 | 1.17 | 0 |
| 58 | Jordan                       | Both   | Age-standardized | 0.54 | 0.49 | 0.59 | 0 |
| 59 | Northern Mariana Islands     | Both   | Age-standardized | 0.54 | 0.49 | 0.59 | 0 |
| 60 | High SDI                     | Male   | All Ages         | 1.61 | 1.51 | 1.7  | 0 |

|    |                          |        |                  |      |      |      |   |
|----|--------------------------|--------|------------------|------|------|------|---|
| 1  |                          |        |                  |      |      |      |   |
| 2  | High SDI                 | Male   | 15-49 years      | 1.29 | 1.19 | 1.39 | 0 |
| 3  | High SDI                 | Male   | 50-69 years      | 1.06 | 1    | 1.12 | 0 |
| 4  | High SDI                 | Male   | 70+ years        | 0.71 | 0.63 | 0.79 | 0 |
| 5  | High SDI                 | Male   | Age-standardized | 1.1  | 1.02 | 1.18 | 0 |
| 6  | High SDI                 | Female | All Ages         | 1.62 | 1.54 | 1.71 | 0 |
| 7  | High SDI                 | Female | 15-49 years      | 1.33 | 1.23 | 1.42 | 0 |
| 8  | High SDI                 | Female | 50-69 years      | 1.13 | 1.1  | 1.16 | 0 |
| 9  | High SDI                 | Female | 70+ years        | 0.8  | 0.7  | 0.9  | 0 |
| 10 | High SDI                 | Female | Age-standardized | 1.15 | 1.08 | 1.22 | 0 |
| 11 | High SDI                 | Both   | All Ages         | 1.62 | 1.53 | 1.71 | 0 |
| 12 | High SDI                 | Both   | 15-49 years      | 1.3  | 1.2  | 1.4  | 0 |
| 13 | High SDI                 | Both   | 50-69 years      | 1.11 | 1.06 | 1.16 | 0 |
| 14 | High SDI                 | Both   | 70+ years        | 0.83 | 0.74 | 0.92 | 0 |
| 15 | High SDI                 | Both   | Age-standardized | 1.14 | 1.06 | 1.21 | 0 |
| 16 | Zimbabwe                 | Male   | All Ages         | 0.7  | 0.62 | 0.79 | 0 |
| 17 | Zimbabwe                 | Male   | 15-49 years      | 0.63 | 0.56 | 0.69 | 0 |
| 18 | Zimbabwe                 | Male   | 50-69 years      | 0.3  | 0.25 | 0.35 | 0 |
| 19 | Zimbabwe                 | Male   | 70+ years        | 0.26 | 0.21 | 0.31 | 0 |
| 20 | Zimbabwe                 | Male   | Age-standardized | 0.36 | 0.3  | 0.41 | 0 |
| 21 | Zimbabwe                 | Female | All Ages         | 1.65 | 1.6  | 1.69 | 0 |
| 22 | Zimbabwe                 | Female | 15-49 years      | 1.3  | 1.21 | 1.39 | 0 |
| 23 | Zimbabwe                 | Female | 50-69 years      | 1.04 | 0.97 | 1.11 | 0 |
| 24 | Zimbabwe                 | Female | 70+ years        | 1.19 | 1.13 | 1.26 | 0 |
| 25 | Zimbabwe                 | Female | Age-standardized | 1.09 | 1.04 | 1.15 | 0 |
| 26 | Zimbabwe                 | Both   | All Ages         | 1.12 | 1.06 | 1.18 | 0 |
| 27 | Zimbabwe                 | Both   | 15-49 years      | 0.92 | 0.85 | 0.99 | 0 |
| 28 | Zimbabwe                 | Both   | 50-69 years      | 0.55 | 0.49 | 0.6  | 0 |
| 29 | Zimbabwe                 | Both   | 70+ years        | 0.67 | 0.63 | 0.71 | 0 |
| 30 | Zimbabwe                 | Both   | Age-standardized | 0.52 | 0.49 | 0.55 | 0 |
| 31 | Sierra Leone             | Both   | All Ages         | 2.15 | 2.02 | 2.29 | 0 |
| 32 | Uzbekistan               | Male   | 15-49 years      | 1.44 | 1.3  | 1.57 | 0 |
| 33 | Uzbekistan               | Male   | 50-69 years      | 0.69 | 0.62 | 0.77 | 0 |
| 34 | Uzbekistan               | Male   | 70+ years        | 1.41 | 1.36 | 1.45 | 0 |
| 35 | Uzbekistan               | Male   | Age-standardized | 1.1  | 0.98 | 1.22 | 0 |
| 36 | Uzbekistan               | Female | All Ages         | 2.21 | 2.02 | 2.4  | 0 |
| 37 | Uzbekistan               | Female | 15-49 years      | 1.54 | 1.4  | 1.67 | 0 |
| 38 | Uzbekistan               | Female | 50-69 years      | 0.92 | 0.83 | 1.01 | 0 |
| 39 | Uzbekistan               | Female | 70+ years        | 1.62 | 1.48 | 1.75 | 0 |
| 40 | Uzbekistan               | Female | Age-standardized | 1.31 | 1.17 | 1.46 | 0 |
| 41 | Uzbekistan               | Both   | All Ages         | 2.18 | 2.02 | 2.34 | 0 |
| 42 | Uzbekistan               | Both   | 15-49 years      | 1.48 | 1.35 | 1.62 | 0 |
| 43 | Uzbekistan               | Both   | 50-69 years      | 0.8  | 0.72 | 0.87 | 0 |
| 44 | Uzbekistan               | Both   | 70+ years        | 1.62 | 1.54 | 1.7  | 0 |
| 45 | Uzbekistan               | Both   | Age-standardized | 0.49 | 0.45 | 0.53 | 0 |
| 46 | Central African Republic | Both   | All Ages         | 2.11 | 2.03 | 2.19 | 0 |
| 47 | Suriname                 | Male   | 15-49 years      | 1.78 | 1.72 | 1.83 | 0 |
| 48 | Suriname                 | Male   | 50-69 years      | 1.2  | 1.14 | 1.27 | 0 |
| 49 | Suriname                 | Male   | 70+ years        | 1.06 | 1    | 1.13 | 0 |
| 50 | Suriname                 | Male   | Age-standardized | 1.29 | 1.21 | 1.36 | 0 |
| 51 | Suriname                 | Female | All Ages         | 2.2  | 2.15 | 2.25 | 0 |
| 52 | Suriname                 | Female | 15-49 years      | 1.62 | 1.57 | 1.66 | 0 |
| 53 | Suriname                 | Female | 50-69 years      | 1.17 | 1.14 | 1.2  | 0 |
| 54 | Suriname                 | Female | 70+ years        | 1.16 | 1.13 | 1.2  | 0 |
| 55 | Suriname                 | Female | Age-standardized | 1.2  | 1.17 | 1.24 | 0 |
| 56 | Suriname                 | Both   | All Ages         | 2.13 | 2.07 | 2.2  | 0 |
| 57 | Suriname                 | Both   | 15-49 years      | 1.69 | 1.64 | 1.74 | 0 |
| 58 | Suriname                 | Both   | 50-69 years      |      |      |      |   |
| 59 | Suriname                 | Both   | 70+ years        |      |      |      |   |
| 60 | Suriname                 | Both   | Age-standardized |      |      |      |   |



|    |                   |        |                  |      |       |      |       |
|----|-------------------|--------|------------------|------|-------|------|-------|
| 1  |                   |        |                  |      |       |      |       |
| 2  | Suriname          | Both   | 50-69 years      | 1.18 | 1.13  | 1.23 | 0     |
| 3  | Suriname          | Both   | 70+ years        | 1.06 | 1.02  | 1.09 | 0     |
| 4  | Uganda            | Both   | Age-standardized | 0.49 | 0.45  | 0.53 | 0     |
| 5  | Afghanistan       | Male   | All Ages         | 0.08 | -0.26 | 0.42 | 0.636 |
| 6  | Afghanistan       | Male   | 15-49 years      | 1.22 | 1.08  | 1.36 | 0     |
| 7  | Afghanistan       | Male   | 50-69 years      | 0.85 | 0.75  | 0.96 | 0     |
| 8  | Afghanistan       | Male   | 70+ years        | 0.68 | 0.6   | 0.77 | 0     |
| 9  | Afghanistan       | Male   | Age-standardized | 0.82 | 0.71  | 0.92 | 0     |
| 10 | Afghanistan       | Female | All Ages         | 0.47 | 0.22  | 0.72 | 0.001 |
| 11 | Afghanistan       | Female | 15-49 years      | 1.4  | 1.27  | 1.54 | 0     |
| 12 | Afghanistan       | Female | 50-69 years      | 1.09 | 1.03  | 1.14 | 0     |
| 13 | Afghanistan       | Female | 70+ years        | 1    | 0.94  | 1.06 | 0     |
| 14 | Afghanistan       | Female | Age-standardized | 1.07 | 1     | 1.14 | 0     |
| 15 | Afghanistan       | Both   | All Ages         | 0.23 | -0.07 | 0.54 | 0.126 |
| 16 | Afghanistan       | Both   | 15-49 years      | 1.32 | 1.19  | 1.45 | 0     |
| 17 | Afghanistan       | Both   | 50-69 years      | 0.83 | 0.73  | 0.93 | 0     |
| 18 | Afghanistan       | Both   | 70+ years        | 0.7  | 0.63  | 0.77 | 0     |
| 19 | Afghanistan       | Both   | Age-standardized | 0.49 | 0.4   | 0.57 | 0     |
| 20 | Senegal           | Both   | Age-standardized | 0.49 | 0.4   | 0.57 | 0     |
| 21 | Brazil            | Male   | All Ages         | 2.32 | 2.3   | 2.34 | 0     |
| 22 | Brazil            | Male   | 15-49 years      | 1.52 | 1.5   | 1.54 | 0     |
| 23 | Brazil            | Male   | 50-69 years      | 1.12 | 1.09  | 1.14 | 0     |
| 24 | Brazil            | Male   | 70+ years        | 0.87 | 0.84  | 0.9  | 0     |
| 25 | Brazil            | Male   | Age-standardized | 1.14 | 1.12  | 1.17 | 0     |
| 26 | Brazil            | Female | All Ages         | 2.54 | 2.51  | 2.56 | 0     |
| 27 | Brazil            | Female | 15-49 years      | 1.63 | 1.61  | 1.65 | 0     |
| 28 | Brazil            | Female | 50-69 years      | 1.22 | 1.17  | 1.27 | 0     |
| 29 | Brazil            | Female | 70+ years        | 1.06 | 1.03  | 1.1  | 0     |
| 30 | Brazil            | Female | Age-standardized | 1.23 | 1.19  | 1.26 | 0     |
| 31 | Brazil            | Both   | All Ages         | 2.41 | 2.39  | 2.43 | 0     |
| 32 | Brazil            | Both   | 15-49 years      | 1.57 | 1.56  | 1.59 | 0     |
| 33 | Brazil            | Both   | 50-69 years      | 1.15 | 1.12  | 1.19 | 0     |
| 34 | Brazil            | Both   | 70+ years        | 0.94 | 0.91  | 0.96 | 0     |
| 35 | Brazil            | Both   | Age-standardized | 0.49 | 0.42  | 0.55 | 0     |
| 36 | Czech Republic    | Both   | Age-standardized | 0.49 | 0.42  | 0.55 | 0     |
| 37 | Thailand          | Male   | All Ages         | 2.85 | 2.81  | 2.9  | 0     |
| 38 | Thailand          | Male   | 15-49 years      | 1.96 | 1.88  | 2.04 | 0     |
| 39 | Thailand          | Male   | 50-69 years      | 1.38 | 1.34  | 1.42 | 0     |
| 40 | Thailand          | Male   | 70+ years        | 1.16 | 1.11  | 1.2  | 0     |
| 41 | Thailand          | Male   | Age-standardized | 1.4  | 1.37  | 1.43 | 0     |
| 42 | Thailand          | Female | All Ages         | 2.87 | 2.79  | 2.95 | 0     |
| 43 | Thailand          | Female | 15-49 years      | 1.93 | 1.82  | 2.04 | 0     |
| 44 | Thailand          | Female | 50-69 years      | 1.4  | 1.32  | 1.48 | 0     |
| 45 | Thailand          | Female | 70+ years        | 1.26 | 1.19  | 1.33 | 0     |
| 46 | Thailand          | Female | Age-standardized | 1.36 | 1.29  | 1.44 | 0     |
| 47 | Thailand          | Both   | All Ages         | 2.85 | 2.81  | 2.9  | 0     |
| 48 | Thailand          | Both   | 15-49 years      | 1.95 | 1.86  | 2.03 | 0     |
| 49 | Thailand          | Both   | 50-69 years      | 1.38 | 1.34  | 1.43 | 0     |
| 50 | Thailand          | Both   | 70+ years        | 1.21 | 1.15  | 1.26 | 0     |
| 51 | Hungary           | Both   | Age-standardized | 0.48 | 0.45  | 0.52 | 0     |
| 52 | Equatorial Guinea | Male   | All Ages         | 1.52 | 1.38  | 1.67 | 0     |
| 53 | Equatorial Guinea | Male   | 15-49 years      | 1.4  | 1.3   | 1.5  | 0     |
| 54 | Equatorial Guinea | Male   | 50-69 years      | 1.31 | 1.19  | 1.44 | 0     |
| 55 | Equatorial Guinea | Male   | 70+ years        | 1.18 | 1.06  | 1.3  | 0     |
| 56 | Equatorial Guinea | Male   | Age-standardized | 1.43 | 1.3   | 1.56 | 0     |
| 57 | Equatorial Guinea | Female | All Ages         | 1.99 | 1.87  | 2.11 | 0     |
| 58 | Equatorial Guinea | Female | 15-49 years      | 1.93 | 1.79  | 2.07 | 0     |
| 59 | Equatorial Guinea | Female | 50-69 years      | 1.73 | 1.6   | 1.86 | 0     |
| 60 | Equatorial Guinea | Female | 50-69 years      | 1.73 | 1.6   | 1.86 | 0     |



|    |                   |        |                  |      |       |      |       |
|----|-------------------|--------|------------------|------|-------|------|-------|
| 1  |                   |        |                  |      |       |      |       |
| 2  | Equatorial Guinea | Female | 70+ years        | 1.84 | 1.7   | 1.98 | 0     |
| 3  | Equatorial Guinea | Female | Age-standardized | 1.86 | 1.71  | 2    | 0     |
| 4  | Equatorial Guinea | Both   | All Ages         | 1.78 | 1.66  | 1.91 | 0     |
| 5  | Equatorial Guinea | Both   | 15-49 years      | 1.76 | 1.64  | 1.87 | 0     |
| 6  | Equatorial Guinea | Both   | 50-69 years      | 1.45 | 1.34  | 1.57 | 0     |
| 7  | Equatorial Guinea | Both   | 70+ years        | 1.5  | 1.37  | 1.63 | 0     |
| 8  | Kazakhstan        | Both   | Age-standardized | 0.45 | 0.34  | 0.56 | 0     |
| 9  | Lebanon           | Male   | All Ages         | 2.03 | 1.98  | 2.07 | 0     |
| 10 | Lebanon           | Male   | 15-49 years      | 1.57 | 1.52  | 1.62 | 0     |
| 11 | Lebanon           | Male   | 50-69 years      | 1.06 | 1.04  | 1.09 | 0     |
| 12 | Lebanon           | Male   | 70+ years        | 0.92 | 0.86  | 0.98 | 0     |
| 13 | Lebanon           | Male   | Age-standardized | 1.12 | 1.09  | 1.15 | 0     |
| 14 | Lebanon           | Female | All Ages         | 2.02 | 1.96  | 2.08 | 0     |
| 15 | Lebanon           | Female | 15-49 years      | 1.54 | 1.49  | 1.59 | 0     |
| 16 | Lebanon           | Female | 50-69 years      | 1.18 | 1.13  | 1.22 | 0     |
| 17 | Lebanon           | Female | 70+ years        | 1.04 | 0.98  | 1.1  | 0     |
| 18 | Lebanon           | Female | Age-standardized | 1.18 | 1.14  | 1.22 | 0     |
| 19 | Lebanon           | Both   | All Ages         | 2.03 | 1.98  | 2.08 | 0     |
| 20 | Lebanon           | Both   | 15-49 years      | 1.59 | 1.54  | 1.64 | 0     |
| 21 | Lebanon           | Both   | 50-69 years      | 1.09 | 1.06  | 1.11 | 0     |
| 22 | Lebanon           | Both   | 70+ years        | 0.97 | 0.9   | 1.03 | 0     |
| 23 | Swaziland         | Both   | Age-standardized | 0.45 | 0.43  | 0.48 | 0     |
| 24 | Nicaragua         | Male   | All Ages         | 3.02 | 2.93  | 3.11 | 0     |
| 25 | Nicaragua         | Male   | 15-49 years      | 1.98 | 1.89  | 2.07 | 0     |
| 26 | Nicaragua         | Male   | 50-69 years      | 1.49 | 1.43  | 1.55 | 0     |
| 27 | Nicaragua         | Male   | 70+ years        | 1.26 | 1.2   | 1.32 | 0     |
| 28 | Nicaragua         | Male   | Age-standardized | 1.59 | 1.52  | 1.66 | 0     |
| 29 | Nicaragua         | Female | All Ages         | 3.12 | 2.99  | 3.25 | 0     |
| 30 | Nicaragua         | Female | 15-49 years      | 2.04 | 1.92  | 2.16 | 0     |
| 31 | Nicaragua         | Female | 50-69 years      | 1.59 | 1.49  | 1.69 | 0     |
| 32 | Nicaragua         | Female | 70+ years        | 1.47 | 1.38  | 1.56 | 0     |
| 33 | Nicaragua         | Female | Age-standardized | 1.64 | 1.53  | 1.74 | 0     |
| 34 | Nicaragua         | Both   | All Ages         | 3.07 | 2.96  | 3.17 | 0     |
| 35 | Nicaragua         | Both   | 15-49 years      | 2.02 | 1.91  | 2.12 | 0     |
| 36 | Nicaragua         | Both   | 50-69 years      | 1.52 | 1.45  | 1.6  | 0     |
| 37 | Nicaragua         | Both   | 70+ years        | 1.35 | 1.28  | 1.42 | 0     |
| 38 | Mozambique        | Both   | Age-standardized | 0.45 | 0.4   | 0.49 | 0     |
| 39 | Czech Republic    | Male   | All Ages         | 1.07 | 1.04  | 1.1  | 0     |
| 40 | Czech Republic    | Male   | 15-49 years      | 0.74 | 0.63  | 0.85 | 0     |
| 41 | Czech Republic    | Male   | 50-69 years      | 0.1  | -0.03 | 0.22 | 0.127 |
| 42 | Czech Republic    | Male   | 70+ years        | 0.14 | 0.12  | 0.17 | 0     |
| 43 | Czech Republic    | Male   | Age-standardized | 0.29 | 0.24  | 0.34 | 0     |
| 44 | Czech Republic    | Female | All Ages         | 1.39 | 1.32  | 1.47 | 0     |
| 45 | Czech Republic    | Female | 15-49 years      | 0.87 | 0.76  | 0.98 | 0     |
| 46 | Czech Republic    | Female | 50-69 years      | 0.69 | 0.48  | 0.91 | 0     |
| 47 | Czech Republic    | Female | 70+ years        | 0.64 | 0.56  | 0.72 | 0     |
| 48 | Czech Republic    | Female | Age-standardized | 0.66 | 0.58  | 0.73 | 0     |
| 49 | Czech Republic    | Both   | All Ages         | 1.21 | 1.16  | 1.25 | 0     |
| 50 | Czech Republic    | Both   | 15-49 years      | 0.81 | 0.7   | 0.92 | 0     |
| 51 | Czech Republic    | Both   | 50-69 years      | 0.39 | 0.23  | 0.54 | 0     |
| 52 | Czech Republic    | Both   | 70+ years        | 0.49 | 0.44  | 0.53 | 0     |
| 53 | Eritrea           | Both   | Age-standardized | 0.44 | 0.41  | 0.47 | 0     |
| 54 | Belize            | Male   | All Ages         | 1.97 | 1.91  | 2.04 | 0     |
| 55 | Belize            | Male   | 15-49 years      | 1.32 | 1.21  | 1.43 | 0     |
| 56 | Belize            | Male   | 50-69 years      | 0.85 | 0.79  | 0.91 | 0     |
| 57 | Belize            | Male   | 70+ years        | 0.67 | 0.6   | 0.74 | 0     |

|    |                      |        |                  |      |      |      |   |
|----|----------------------|--------|------------------|------|------|------|---|
| 1  |                      |        |                  |      |      |      |   |
| 2  | Belize               | Male   | Age-standardized | 0.97 | 0.9  | 1.04 | 0 |
| 3  | Belize               | Female | All Ages         | 2.12 | 1.99 | 2.25 | 0 |
| 4  | Belize               | Female | 15-49 years      | 1.44 | 1.27 | 1.61 | 0 |
| 5  | Belize               | Female | 50-69 years      | 1    | 0.86 | 1.14 | 0 |
| 6  | Belize               | Female | 70+ years        | 0.99 | 0.82 | 1.17 | 0 |
| 7  | Belize               | Female | Age-standardized | 1.08 | 0.93 | 1.23 | 0 |
| 8  | Belize               | Both   | All Ages         | 2.02 | 1.93 | 2.11 | 0 |
| 9  | Belize               | Both   | 15-49 years      | 1.35 | 1.22 | 1.48 | 0 |
| 10 | Belize               | Both   | 50-69 years      | 0.9  | 0.8  | 1    | 0 |
| 11 | Belize               | Both   | 70+ years        | 0.85 | 0.74 | 0.96 | 0 |
| 12 | Montenegro           | Both   | Age-standardized | 0.43 | 0.33 | 0.52 | 0 |
| 13 | United Arab Emirates | Male   | All Ages         | 2.27 | 2.21 | 2.34 | 0 |
| 14 | United Arab Emirates | Male   | 15-49 years      | 1.48 | 1.35 | 1.6  | 0 |
| 15 | United Arab Emirates | Male   | 50-69 years      | 1.04 | 1    | 1.07 | 0 |
| 16 | United Arab Emirates | Male   | 70+ years        | 0.83 | 0.79 | 0.88 | 0 |
| 17 | United Arab Emirates | Male   | Age-standardized | 1.12 | 1.08 | 1.16 | 0 |
| 18 | United Arab Emirates | Female | All Ages         | 3.3  | 3.22 | 3.38 | 0 |
| 19 | United Arab Emirates | Female | 15-49 years      | 2.02 | 1.9  | 2.15 | 0 |
| 20 | United Arab Emirates | Female | 50-69 years      | 1.35 | 1.27 | 1.43 | 0 |
| 21 | United Arab Emirates | Female | 70+ years        | 1.13 | 1.04 | 1.22 | 0 |
| 22 | United Arab Emirates | Female | Age-standardized | 1.39 | 1.3  | 1.48 | 0 |
| 23 | United Arab Emirates | Both   | All Ages         | 2.7  | 2.66 | 2.74 | 0 |
| 24 | United Arab Emirates | Both   | 15-49 years      | 1.7  | 1.58 | 1.81 | 0 |
| 25 | United Arab Emirates | Both   | 50-69 years      | 1.16 | 1.11 | 1.2  | 0 |
| 26 | United Arab Emirates | Both   | 70+ years        | 0.97 | 0.89 | 1.04 | 0 |
| 27 | Mongolia             | Both   | Age-standardized | 0.4  | 0.33 | 0.46 | 0 |
| 28 | Sierra Leone         | Male   | All Ages         | 0.51 | 0.39 | 0.63 | 0 |
| 29 | Sierra Leone         | Male   | 15-49 years      | 0.48 | 0.43 | 0.52 | 0 |
| 30 | Sierra Leone         | Male   | 50-69 years      | 0.57 | 0.53 | 0.6  | 0 |
| 31 | Sierra Leone         | Male   | 70+ years        | 0.6  | 0.57 | 0.63 | 0 |
| 32 | Sierra Leone         | Male   | Age-standardized | 0.62 | 0.6  | 0.65 | 0 |
| 33 | Sierra Leone         | Female | All Ages         | 0.21 | 0.13 | 0.29 | 0 |
| 34 | Sierra Leone         | Female | 15-49 years      | 0.19 | 0.13 | 0.24 | 0 |
| 35 | Sierra Leone         | Female | 50-69 years      | 0.25 | 0.21 | 0.29 | 0 |
| 36 | Sierra Leone         | Female | 70+ years        | 0.43 | 0.38 | 0.47 | 0 |
| 37 | Sierra Leone         | Female | Age-standardized | 0.32 | 0.28 | 0.36 | 0 |
| 38 | Sierra Leone         | Both   | All Ages         | 0.41 | 0.31 | 0.51 | 0 |
| 39 | Sierra Leone         | Both   | 15-49 years      | 0.4  | 0.36 | 0.45 | 0 |
| 40 | Sierra Leone         | Both   | 50-69 years      | 0.48 | 0.43 | 0.52 | 0 |
| 41 | Sierra Leone         | Both   | 70+ years        | 0.42 | 0.39 | 0.46 | 0 |
| 42 | Zambia               | Both   | Age-standardized | 0.39 | 0.36 | 0.43 | 0 |
| 43 | Mauritius            | Male   | All Ages         | 2.36 | 2.32 | 2.4  | 0 |
| 44 | Mauritius            | Male   | 15-49 years      | 1.55 | 1.45 | 1.65 | 0 |
| 45 | Mauritius            | Male   | 50-69 years      | 1.12 | 1.08 | 1.16 | 0 |
| 46 | Mauritius            | Male   | 70+ years        | 0.85 | 0.79 | 0.91 | 0 |
| 47 | Mauritius            | Male   | Age-standardized | 1.19 | 1.14 | 1.24 | 0 |
| 48 | Mauritius            | Female | All Ages         | 2.57 | 2.5  | 2.65 | 0 |
| 49 | Mauritius            | Female | 15-49 years      | 1.66 | 1.52 | 1.8  | 0 |
| 50 | Mauritius            | Female | 50-69 years      | 1.35 | 1.28 | 1.42 | 0 |
| 51 | Mauritius            | Female | 70+ years        | 1.19 | 1.11 | 1.28 | 0 |
| 52 | Mauritius            | Female | Age-standardized | 1.35 | 1.26 | 1.43 | 0 |
| 53 | Mauritius            | Both   | All Ages         | 2.46 | 2.4  | 2.51 | 0 |
| 54 | Mauritius            | Both   | 15-49 years      | 1.6  | 1.48 | 1.71 | 0 |
| 55 | Mauritius            | Both   | 50-69 years      | 1.24 | 1.19 | 1.28 | 0 |
| 56 | Mauritius            | Both   | 70+ years        | 1.04 | 0.97 | 1.11 | 0 |
| 57 | Comoros              | Both   | Age-standardized | 0.39 | 0.37 | 0.42 | 0 |

|    |             |        |                  |      |      |      |   |
|----|-------------|--------|------------------|------|------|------|---|
| 1  |             |        |                  |      |      |      |   |
| 2  | The Gambia  | Male   | All Ages         | 1.02 | 1    | 1.04 | 0 |
| 3  | The Gambia  | Male   | 15-49 years      | 0.76 | 0.72 | 0.8  | 0 |
| 4  | The Gambia  | Male   | 50-69 years      | 0.72 | 0.69 | 0.76 | 0 |
| 5  | The Gambia  | Male   | 70+ years        | 0.73 | 0.7  | 0.76 | 0 |
| 6  | The Gambia  | Male   | Age-standardized | 0.76 | 0.73 | 0.79 | 0 |
| 7  | The Gambia  | Female | All Ages         | 0.92 | 0.87 | 0.97 | 0 |
| 8  | The Gambia  | Female | 15-49 years      | 0.46 | 0.43 | 0.49 | 0 |
| 9  | The Gambia  | Female | 50-69 years      | 0.35 | 0.31 | 0.38 | 0 |
| 10 | The Gambia  | Female | 70+ years        | 0.51 | 0.48 | 0.53 | 0 |
| 11 | The Gambia  | Female | Age-standardized | 0.41 | 0.38 | 0.44 | 0 |
| 12 | The Gambia  | Both   | All Ages         | 0.96 | 0.94 | 0.98 | 0 |
| 13 | The Gambia  | Both   | 15-49 years      | 0.62 | 0.6  | 0.65 | 0 |
| 14 | The Gambia  | Both   | 50-69 years      | 0.47 | 0.45 | 0.5  | 0 |
| 15 | The Gambia  | Both   | 70+ years        | 0.53 | 0.5  | 0.56 | 0 |
| 16 | The Gambia  | Both   | Age-standardized | 0.37 | 0.33 | 0.41 | 0 |
| 17 | Madagascar  | Both   | Age-standardized | 0.37 | 0.33 | 0.41 | 0 |
| 18 | Cuba        | Male   | All Ages         | 2.02 | 1.93 | 2.11 | 0 |
| 19 | Cuba        | Male   | 15-49 years      | 1.6  | 1.53 | 1.67 | 0 |
| 20 | Cuba        | Male   | 50-69 years      | 1.03 | 0.94 | 1.12 | 0 |
| 21 | Cuba        | Male   | 70+ years        | 0.82 | 0.74 | 0.89 | 0 |
| 22 | Cuba        | Male   | Age-standardized | 1.08 | 0.99 | 1.18 | 0 |
| 23 | Cuba        | Female | All Ages         | 2.1  | 2.03 | 2.16 | 0 |
| 24 | Cuba        | Female | 15-49 years      | 1.52 | 1.45 | 1.6  | 0 |
| 25 | Cuba        | Female | 50-69 years      | 1.03 | 0.96 | 1.11 | 0 |
| 26 | Cuba        | Female | 70+ years        | 0.88 | 0.83 | 0.93 | 0 |
| 27 | Cuba        | Female | Age-standardized | 1.02 | 0.96 | 1.08 | 0 |
| 28 | Cuba        | Both   | All Ages         | 2.04 | 1.96 | 2.12 | 0 |
| 29 | Cuba        | Both   | 15-49 years      | 1.58 | 1.51 | 1.65 | 0 |
| 30 | Cuba        | Both   | 50-69 years      | 1.01 | 0.93 | 1.09 | 0 |
| 31 | Cuba        | Both   | 70+ years        | 0.81 | 0.75 | 0.88 | 0 |
| 32 | Cuba        | Both   | Age-standardized | 0.35 | 0.33 | 0.38 | 0 |
| 33 | South Sudan | Both   | Age-standardized | 0.35 | 0.33 | 0.38 | 0 |
| 34 | Timor-Leste | Male   | All Ages         | 0.98 | 0.93 | 1.04 | 0 |
| 35 | Timor-Leste | Male   | 15-49 years      | 0.42 | 0.4  | 0.43 | 0 |
| 36 | Timor-Leste | Male   | 50-69 years      | 0.62 | 0.59 | 0.66 | 0 |
| 37 | Timor-Leste | Male   | 70+ years        | 0.5  | 0.49 | 0.52 | 0 |
| 38 | Timor-Leste | Male   | Age-standardized | 0.56 | 0.53 | 0.59 | 0 |
| 39 | Timor-Leste | Female | All Ages         | 1.21 | 1.13 | 1.29 | 0 |
| 40 | Timor-Leste | Female | 15-49 years      | 0.42 | 0.37 | 0.47 | 0 |
| 41 | Timor-Leste | Female | 50-69 years      | 0.92 | 0.89 | 0.95 | 0 |
| 42 | Timor-Leste | Female | 70+ years        | 0.81 | 0.79 | 0.83 | 0 |
| 43 | Timor-Leste | Female | Age-standardized | 0.8  | 0.77 | 0.83 | 0 |
| 44 | Timor-Leste | Both   | All Ages         | 1.07 | 1.01 | 1.14 | 0 |
| 45 | Timor-Leste | Both   | 15-49 years      | 0.41 | 0.38 | 0.43 | 0 |
| 46 | Timor-Leste | Both   | 50-69 years      | 0.73 | 0.7  | 0.76 | 0 |
| 47 | Timor-Leste | Both   | 70+ years        | 0.61 | 0.59 | 0.63 | 0 |
| 48 | Timor-Leste | Both   | Age-standardized | 0.34 | 0.22 | 0.46 | 0 |
| 49 | Nigeria     | Both   | Age-standardized | 0.34 | 0.22 | 0.46 | 0 |
| 50 | Bangladesh  | Male   | All Ages         | 2.53 | 2.38 | 2.68 | 0 |
| 51 | Bangladesh  | Male   | 15-49 years      | 1.43 | 1.35 | 1.51 | 0 |
| 52 | Bangladesh  | Male   | 50-69 years      | 1.13 | 1.04 | 1.21 | 0 |
| 53 | Bangladesh  | Male   | 70+ years        | 1.22 | 1.13 | 1.31 | 0 |
| 54 | Bangladesh  | Male   | Age-standardized | 1.18 | 1.09 | 1.27 | 0 |
| 55 | Bangladesh  | Female | All Ages         | 2.6  | 2.44 | 2.75 | 0 |
| 56 | Bangladesh  | Female | 15-49 years      | 1.5  | 1.39 | 1.61 | 0 |
| 57 | Bangladesh  | Female | 50-69 years      | 1.04 | 0.94 | 1.15 | 0 |
| 58 | Bangladesh  | Female | 70+ years        | 1.29 | 1.18 | 1.4  | 0 |
| 59 | Bangladesh  | Female | Age-standardized | 1.1  | 1.01 | 1.2  | 0 |
| 60 | Bangladesh  | Both   | All Ages         | 2.52 | 2.37 | 2.66 | 0 |

|    |                            |        |                  |       |       |       |       |
|----|----------------------------|--------|------------------|-------|-------|-------|-------|
| 1  |                            |        |                  |       |       |       |       |
| 2  | Bangladesh                 | Both   | 15-49 years      | 1.4   | 1.32  | 1.49  | 0     |
| 3  | Bangladesh                 | Both   | 50-69 years      | 1.05  | 0.97  | 1.13  | 0     |
| 4  | Bangladesh                 | Both   | 70+ years        | 1.2   | 1.11  | 1.29  | 0     |
| 5  | Burundi                    | Both   | Age-standardized | 0.33  | 0.31  | 0.36  | 0     |
| 6  | Hungary                    | Male   | All Ages         | 0.8   | 0.78  | 0.83  | 0     |
| 7  | Hungary                    | Male   | 15-49 years      | 0.57  | 0.5   | 0.64  | 0     |
| 8  | Hungary                    | Male   | 50-69 years      | -0.02 | -0.09 | 0.05  | 0.554 |
| 9  | Hungary                    | Male   | 70+ years        | 0.24  | 0.19  | 0.3   | 0     |
| 10 | Hungary                    | Male   | Age-standardized | 0.24  | 0.22  | 0.27  | 0     |
| 11 | Hungary                    | Female | All Ages         | 1.47  | 1.44  | 1.51  | 0     |
| 12 | Hungary                    | Female | 15-49 years      | 0.8   | 0.73  | 0.87  | 0     |
| 13 | Hungary                    | Female | 50-69 years      | 0.85  | 0.77  | 0.93  | 0     |
| 14 | Hungary                    | Female | 70+ years        | 0.87  | 0.84  | 0.91  | 0     |
| 15 | Hungary                    | Female | Age-standardized | 0.76  | 0.72  | 0.8   | 0     |
| 16 | Hungary                    | Both   | All Ages         | 1.09  | 1.06  | 1.13  | 0     |
| 17 | Hungary                    | Both   | 15-49 years      | 0.66  | 0.59  | 0.73  | 0     |
| 18 | Hungary                    | Both   | 50-69 years      | 0.4   | 0.32  | 0.47  | 0     |
| 19 | Hungary                    | Both   | 70+ years        | 0.57  | 0.55  | 0.6   | 0     |
| 20 | Hungary                    | Both   | Age-standardized | 0.3   | 0.22  | 0.38  | 0     |
| 21 | Slovakia                   | Both   | Age-standardized | 0.3   | 0.22  | 0.38  | 0     |
| 22 | Ghana                      | Male   | All Ages         | 1.99  | 1.95  | 2.04  | 0     |
| 23 | Ghana                      | Male   | 15-49 years      | 1.6   | 1.56  | 1.65  | 0     |
| 24 | Ghana                      | Male   | 50-69 years      | 1.44  | 1.4   | 1.48  | 0     |
| 25 | Ghana                      | Male   | 70+ years        | 1.45  | 1.4   | 1.5   | 0     |
| 26 | Ghana                      | Male   | Age-standardized | 1.51  | 1.46  | 1.55  | 0     |
| 27 | Ghana                      | Female | All Ages         | 1.79  | 1.74  | 1.84  | 0     |
| 28 | Ghana                      | Female | 15-49 years      | 1.3   | 1.23  | 1.37  | 0     |
| 29 | Ghana                      | Female | 50-69 years      | 1.1   | 1.06  | 1.14  | 0     |
| 30 | Ghana                      | Female | 70+ years        | 1.28  | 1.23  | 1.33  | 0     |
| 31 | Ghana                      | Female | Age-standardized | 1.19  | 1.14  | 1.24  | 0     |
| 32 | Ghana                      | Both   | All Ages         | 1.89  | 1.85  | 1.94  | 0     |
| 33 | Ghana                      | Both   | 15-49 years      | 1.47  | 1.41  | 1.52  | 0     |
| 34 | Ghana                      | Both   | 50-69 years      | 1.24  | 1.2   | 1.28  | 0     |
| 35 | Ghana                      | Both   | 70+ years        | 1.28  | 1.23  | 1.33  | 0     |
| 36 | Ghana                      | Both   | Age-standardized | 0.29  | 0.23  | 0.35  | 0     |
| 37 | Somalia                    | Both   | Age-standardized | 0.29  | 0.23  | 0.35  | 0     |
| 38 | Mozambique                 | Male   | All Ages         | 0.42  | 0.36  | 0.49  | 0     |
| 39 | Mozambique                 | Male   | 15-49 years      | 0.74  | 0.65  | 0.82  | 0     |
| 40 | Mozambique                 | Male   | 50-69 years      | 0.66  | 0.61  | 0.71  | 0     |
| 41 | Mozambique                 | Male   | 70+ years        | 0.7   | 0.65  | 0.75  | 0     |
| 42 | Mozambique                 | Male   | Age-standardized | 0.7   | 0.65  | 0.75  | 0     |
| 43 | Mozambique                 | Female | All Ages         | -0.11 | -0.19 | -0.03 | 0.009 |
| 44 | Mozambique                 | Female | 15-49 years      | 0.11  | 0.03  | 0.19  | 0.013 |
| 45 | Mozambique                 | Female | 50-69 years      | 0.07  | 0.03  | 0.11  | 0.001 |
| 46 | Mozambique                 | Female | 70+ years        | 0.2   | 0.15  | 0.25  | 0     |
| 47 | Mozambique                 | Female | Age-standardized | 0.12  | 0.08  | 0.17  | 0     |
| 48 | Mozambique                 | Both   | All Ages         | 0.21  | 0.15  | 0.28  | 0     |
| 49 | Mozambique                 | Both   | 15-49 years      | 0.5   | 0.41  | 0.59  | 0     |
| 50 | Mozambique                 | Both   | 50-69 years      | 0.38  | 0.34  | 0.43  | 0     |
| 51 | Mozambique                 | Both   | 70+ years        | 0.34  | 0.29  | 0.38  | 0     |
| 52 | Mozambique                 | Both   | Age-standardized | 0.28  | 0.19  | 0.37  | 0     |
| 53 | Democratic Republic of the | Both   | Age-standardized | 0.28  | 0.19  | 0.37  | 0     |
| 54 |                            |        |                  |       |       |       |       |
| 55 |                            |        |                  |       |       |       |       |
| 56 |                            |        |                  |       |       |       |       |
| 57 |                            |        |                  |       |       |       |       |
| 58 |                            |        |                  |       |       |       |       |
| 59 |                            |        |                  |       |       |       |       |
| 60 |                            |        |                  |       |       |       |       |

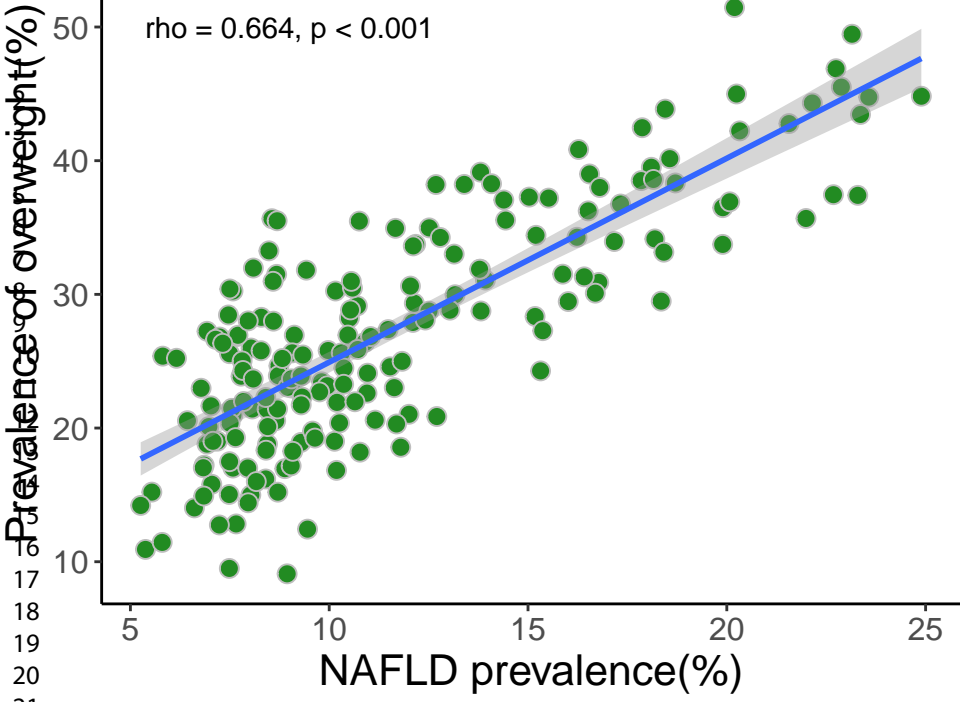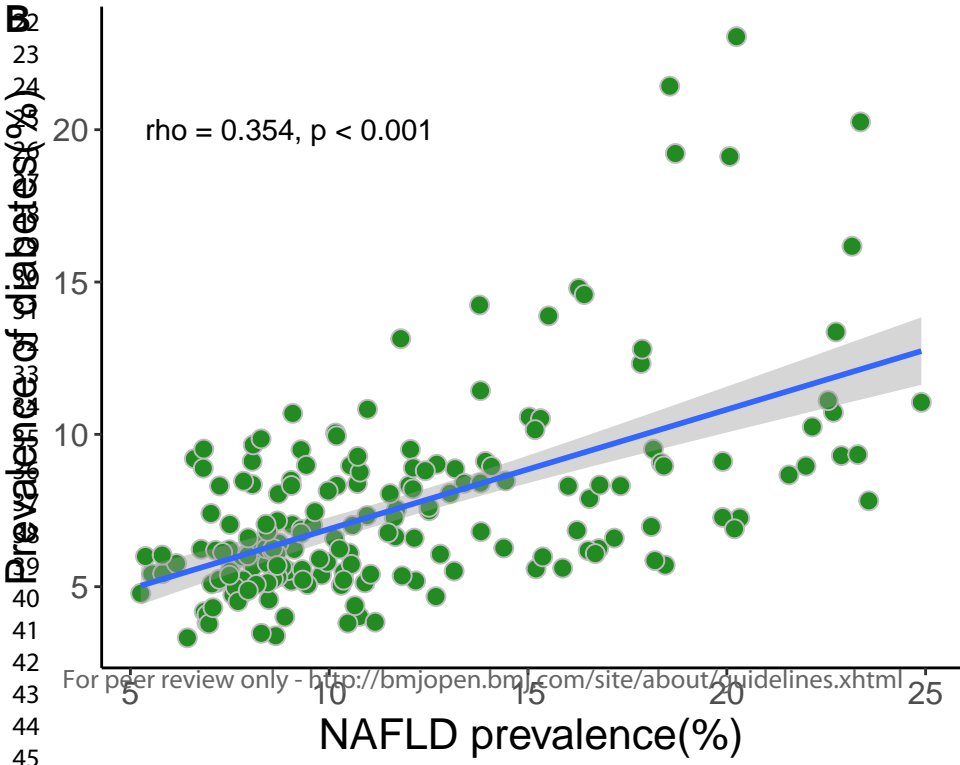

STROBE Statement—Checklist of items that should be included in reports of *cohort studies*

|                              | Item No | Recommendation                                                                                                                                                                                                                                                                                                         | Page No |
|------------------------------|---------|------------------------------------------------------------------------------------------------------------------------------------------------------------------------------------------------------------------------------------------------------------------------------------------------------------------------|---------|
| <b>Title and abstract</b>    | 1       | (a) Indicate the study's design with a commonly used term in the title or the abstract<br>(b) Provide in the abstract an informative and balanced summary of what was done and what was found                                                                                                                          | 1, 2    |
| <b>Introduction</b>          |         |                                                                                                                                                                                                                                                                                                                        |         |
| Background/rationale         | 2       | Explain the scientific background and rationale for the investigation being reported                                                                                                                                                                                                                                   | 3       |
| Objectives                   | 3       | State specific objectives, including any prespecified hypotheses                                                                                                                                                                                                                                                       | 3       |
| <b>Methods</b>               |         |                                                                                                                                                                                                                                                                                                                        |         |
| Study design                 | 4       | Present key elements of study design early in the paper                                                                                                                                                                                                                                                                | 4       |
| Setting                      | 5       | Describe the setting, locations, and relevant dates, including periods of recruitment, exposure, follow-up, and data collection                                                                                                                                                                                        | 4       |
| Participants                 | 6       | (a) Give the eligibility criteria, and the sources and methods of selection of participants. Describe methods of follow-up<br>(b) For matched studies, give matching criteria and number of exposed and unexposed                                                                                                      | 4       |
| Variables                    | 7       | Clearly define all outcomes, exposures, predictors, potential confounders, and effect modifiers. Give diagnostic criteria, if applicable                                                                                                                                                                               | 4       |
| Data sources/<br>measurement | 8*      | For each variable of interest, give sources of data and details of methods of assessment (measurement). Describe comparability of assessment methods if there is more than one group                                                                                                                                   | 4       |
| Bias                         | 9       | Describe any efforts to address potential sources of bias                                                                                                                                                                                                                                                              | 4       |
| Study size                   | 10      | Explain how the study size was arrived at                                                                                                                                                                                                                                                                              | 4       |
| Quantitative variables       | 11      | Explain how quantitative variables were handled in the analyses. If applicable, describe which groupings were chosen and why                                                                                                                                                                                           | 4       |
| Statistical methods          | 12      | (a) Describe all statistical methods, including those used to control for confounding<br>(b) Describe any methods used to examine subgroups and interactions<br>(c) Explain how missing data were addressed<br>(d) If applicable, explain how loss to follow-up was addressed<br>(e) Describe any sensitivity analyses | 4       |
| <b>Results</b>               |         |                                                                                                                                                                                                                                                                                                                        |         |
| Participants                 | 13*     | (a) Report numbers of individuals at each stage of study—eg numbers potentially eligible, examined for eligibility, confirmed eligible, included in the study, completing follow-up, and analysed<br>(b) Give reasons for non-participation at each stage<br>(c) Consider use of a flow diagram                        | 5       |
| Descriptive data             | 14*     | (a) Give characteristics of study participants (eg demographic, clinical, social) and information on exposures and potential confounders<br>(b) Indicate number of participants with missing data for each variable of interest<br>(c) Summarise follow-up time (eg, average and total amount)                         | 5       |
| Outcome data                 | 15*     | Report numbers of outcome events or summary measures over time                                                                                                                                                                                                                                                         | 6       |



|    |                          |    |                                                                                                                                                                                                              |     |
|----|--------------------------|----|--------------------------------------------------------------------------------------------------------------------------------------------------------------------------------------------------------------|-----|
| 1  | Main results             | 16 | (a) Give unadjusted estimates and, if applicable, confounder-adjusted estimates and their precision (eg, 95% confidence interval). Make clear which confounders were adjusted for and why they were included | 5-6 |
| 2  |                          |    |                                                                                                                                                                                                              |     |
| 3  |                          |    | (b) Report category boundaries when continuous variables were categorized                                                                                                                                    |     |
| 4  |                          |    | (c) If relevant, consider translating estimates of relative risk into absolute risk for a meaningful time period                                                                                             |     |
| 5  | Other analyses           | 17 | Report other analyses done—eg analyses of subgroups and interactions, and sensitivity analyses                                                                                                               |     |
| 6  |                          |    |                                                                                                                                                                                                              |     |
| 7  |                          |    |                                                                                                                                                                                                              |     |
| 8  |                          |    |                                                                                                                                                                                                              |     |
| 9  |                          |    |                                                                                                                                                                                                              |     |
| 10 |                          |    |                                                                                                                                                                                                              |     |
| 11 | <b>Discussion</b>        |    |                                                                                                                                                                                                              |     |
| 12 |                          |    |                                                                                                                                                                                                              |     |
| 13 | Key results              | 18 | Summarise key results with reference to study objectives                                                                                                                                                     | 6   |
| 14 | Limitations              | 19 | Discuss limitations of the study, taking into account sources of potential bias or imprecision. Discuss both direction and magnitude of any potential bias                                                   | 8   |
| 15 |                          |    |                                                                                                                                                                                                              |     |
| 16 | Interpretation           | 20 | Give a cautious overall interpretation of results considering objectives, limitations, multiplicity of analyses, results from similar studies, and other relevant evidence                                   | 7-8 |
| 17 |                          |    |                                                                                                                                                                                                              |     |
| 18 | Generalisability         | 21 | Discuss the generalisability (external validity) of the study results                                                                                                                                        | 7   |
| 19 |                          |    |                                                                                                                                                                                                              |     |
| 20 |                          |    |                                                                                                                                                                                                              |     |
| 21 | <b>Other information</b> |    |                                                                                                                                                                                                              |     |
| 22 | Funding                  | 22 | Give the source of funding and the role of the funders for the present study and, if applicable, for the original study on which the present article is based                                                | 1   |
| 23 |                          |    |                                                                                                                                                                                                              |     |
| 24 |                          |    |                                                                                                                                                                                                              |     |

25  
26 \*Give information separately for exposed and unexposed groups.

27  
28 **Note:** An Explanation and Elaboration article discusses each checklist item and gives methodological background and  
29 published examples of transparent reporting. The STROBE checklist is best used in conjunction with this article (freely  
30 available on the Web sites of PLoS Medicine at <http://www.plosmedicine.org/>, Annals of Internal Medicine at  
31 <http://www.annals.org/>, and Epidemiology at <http://www.epidem.com/>). Information on the STROBE Initiative is  
32 available at <http://www.strobe-statement.org>.  
33  
34  
35  
36  
37  
38  
39  
40  
41  
42  
43  
44  
45  
46  
47  
48  
49  
50  
51  
52  
53  
54  
55  
56  
57  
58  
59  
60

# BMJ Open

## Prevalence trends in nonalcoholic fatty liver disease at the global, regional, and national levels, 1990-2017: A population-based observational study

|                                 |                                                                                                                                                                                                                                                                                                                                                                                          |
|---------------------------------|------------------------------------------------------------------------------------------------------------------------------------------------------------------------------------------------------------------------------------------------------------------------------------------------------------------------------------------------------------------------------------------|
| Journal:                        | <i>BMJ Open</i>                                                                                                                                                                                                                                                                                                                                                                          |
| Manuscript ID                   | bmjopen-2019-036663.R2                                                                                                                                                                                                                                                                                                                                                                   |
| Article Type:                   | Original research                                                                                                                                                                                                                                                                                                                                                                        |
| Date Submitted by the Author:   | 21-Apr-2020                                                                                                                                                                                                                                                                                                                                                                              |
| Complete List of Authors:       | Ge, Xiaojun; Zunyi Medical University, Department of Laboratory Medicine<br>Zheng, Limei; Zunyi Medical University, Department of Laboratory Medicine<br>Wang, Mei; Zunyi Medical University, Department of Laboratory Medicine<br>Du, Yuxuan; Zunyi Medical University, Department of Laboratory Medicine<br>Jiang, Junyao; Zunyi Medical University, Department of Laboratory Medicine |
| <b>Primary Subject Heading</b>: | Epidemiology                                                                                                                                                                                                                                                                                                                                                                             |
| Secondary Subject Heading:      | Gastroenterology and hepatology, Global health, Health informatics, Public health                                                                                                                                                                                                                                                                                                        |
| Keywords:                       | EPIDEMIOLOGY, Adult gastroenterology < GASTROENTEROLOGY, Hepatobiliary disease < GASTROENTEROLOGY                                                                                                                                                                                                                                                                                        |
|                                 |                                                                                                                                                                                                                                                                                                                                                                                          |

SCHOLARONE™  
Manuscripts



I, the Submitting Author has the right to grant and does grant on behalf of all authors of the Work (as defined in the below author licence), an exclusive licence and/or a non-exclusive licence for contributions from authors who are: i) UK Crown employees; ii) where BMJ has agreed a CC-BY licence shall apply, and/or iii) in accordance with the terms applicable for US Federal Government officers or employees acting as part of their official duties; on a worldwide, perpetual, irrevocable, royalty-free basis to BMJ Publishing Group Ltd ("BMJ") its licensees and where the relevant Journal is co-owned by BMJ to the co-owners of the Journal, to publish the Work in this journal and any other BMJ products and to exploit all rights, as set out in our [licence](#).

The Submitting Author accepts and understands that any supply made under these terms is made by BMJ to the Submitting Author unless you are acting as an employee on behalf of your employer or a postgraduate student of an affiliated institution which is paying any applicable article publishing charge ("APC") for Open Access articles. Where the Submitting Author wishes to make the Work available on an Open Access basis (and intends to pay the relevant APC), the terms of reuse of such Open Access shall be governed by a Creative Commons licence – details of these licences and which [Creative Commons](#) licence will apply to this Work are set out in our licence referred to above.

Other than as permitted in any relevant BMJ Author's Self Archiving Policies, I confirm this Work has not been accepted for publication elsewhere, is not being considered for publication elsewhere and does not duplicate material already published. I confirm all authors consent to publication of this Work and authorise the granting of this licence.

## Original article

### Prevalence trends in nonalcoholic fatty liver disease at the global, regional, and national levels, 1990-2017: A population-based observational study

Xiao-jun Ge<sup>1\*</sup>, Li-mei Zheng<sup>1\*</sup>, Mei Wang<sup>1</sup>, Yu-Xuan Du<sup>1</sup>, Jun-Yao Jiang<sup>1</sup>

1. Department of Laboratory Medicine, The Second Affiliated Hospital of Zunyi Medical University, Zunyi, Guizhou, 563000

\* These authors contributed equally

Corresponding author: Xiao-jun Ge, Department of Laboratory Medicine, The Second Affiliated Hospital of Zunyi Medical University, Zunyi, Guizhou, 563000, China.

Tel:+86-15338526285

Fax:+86-0851-27596297

E-mail: gxj\_199421@126.com

**Running title:** Global prevalence of NAFLD

#### Abstract

**Objective:** Nonalcoholic fatty liver disease (NAFLD) is the leading cause of end-stage liver diseases worldwide. Understanding NAFLD prevalence and trends over time at the global, regional, and national levels is critical to understanding the NAFLD disease burden and creating more tailored prevention strategies.

**Design:** Population-based observational study

**Setting:** The study was global, including 21 regions and 195 countries or territories.

**Main outcomes measure:** The estimated annual percentage change (EAPC) for NAFLD prevalence

**Results:** Worldwide, cases of NAFLD have increased from 391.2 million in 1990 to 882.1 million in 2017, with the prevalence rate increasing from 8.2% to 10.9% during the same period. The increasing trends were consistent across sexes. Case numbers were highest in East Asia, followed by South Asia, then North Africa and the Middle East. The highest prevalence of NAFLD was observed in North Africa and the Middle East, while the greatest increase was detected in Western Europe, followed by Tropical Latin America, then High-income North America.

**Conclusion:** Nearly all countries or territories worldwide have experienced a

1  
2  
3 significant increase in NAFLD prevalence. The greatest increase was observed in Oman.  
4 Almost all countries showed a significant increasing trend in NAFLD prevalence over  
5 the past three decades. This drastic increase is alarming and suggests that NAFLD has  
6 emerged as a new public health concern worldwide. As such, more efficient prevention  
7 strategies are urgently needed.  
8  
9

10  
11  
12 **Keywords:** NAFLD; global; prevalence; liver disease; increase  
13  
14

15  
16 **Strengths and limitations of this study:**

- 17  
18  
19  
20  
21  
22  
23  
24  
25  
26  
27  
28  
29  
30  
31  
32  
33  
34  
35  
36  
37  
38  
39  
40  
41  
42  
43  
44  
45  
46  
47  
48  
49  
50  
51  
52  
53  
54  
55  
56  
57  
58  
59  
60
- Our study comprehensively investigated temporal trends in NAFLD prevalence at the global, regional, and national levels.
  - We assessed secular trends in NAFLD risk factors, according to the Global Burden of Disease study.
  - All data used in our study were derived from mathematical estimates rather than surveillance data.

## Introduction

Over the past three decades, nonalcoholic fatty liver disease (NAFLD) has gone from an obscure liver disorder to the most prominent chronic liver disease worldwide.<sup>1,2</sup> NAFLD is a growing cause of end-stage liver disease and has been recognized as an etiology of hepatocellular cancer (HCC), even in the absence of underlying cirrhosis.<sup>3</sup> NAFLD is highly prevalent across nearly all continents and is geographically heterogeneous in its prevalence from country to country, with the highest rates, for example, being reported in South America and the Middle East, followed by Asia, the United States, and Europe; NAFLD is less common in Africa.<sup>4</sup>

In line with the worldwide increases in obesity and type 2 diabetes,<sup>5,6</sup> in recent years, NAFLD has shown novel epidemics in both developed and developing countries. Understanding temporal trends in NAFLD prevalence is vital to better understanding its disease burden and preventing additional cases of NAFLD. Previous studies have either focused on individual regions had limited time frames.<sup>3,7,8</sup> Fortunately, the Global Burden of Disease (GBD) study, which provides a tool for quantifying health losses caused by hundreds of diseases, injuries, and risk factors, fills the gap when actual data on disease burden is sparse or unavailable, providing an unprecedented opportunity to learn more about NAFLD epidemiology. This study uses the data from the GBD study to comprehensively describe NAFLD prevalence and to quantify its temporal trends between 1990 and 2017 at the global, regional, and national levels. Our results are instrumental in raising awareness of NAFLD and will be invaluable in the establishment of updated prevention strategies.

## Materials and methods

Prevalence data for NAFLD by sex, region, and age were retrieved using the online Global Health Data Exchange (GHDx) query tool.<sup>9</sup> We utilized data from five sociodemographic index (SDI) regions (low, low-middle, middle, high-middle, and high), 21 GBD geographically defined regions (e.g., East Asia), and a total of 195 countries and territories. The SDI is a composite average of the rankings of residents' incomes per capita, average educational attainment, and fertility rates in all areas for their respective regions, according to the GBD study. Prevalence (or the prevalence rate) is a commonly used epidemiological index that quantifies the degree to which a disease or condition exists within a population at a particular point in time. We calculated



annual NAFLD prevalence as:  $Prevalence = \frac{\text{case number}}{\text{population size}}$ , where the case number denotes the number of NAFLD cases diagnosed at the end of that year. The general methods used in the GBD for creating estimates have been detailed in previous studies.<sup>10</sup> NAFLD is an umbrella term for a range of liver conditions affecting people who drink little to no alcohol and is identified by ICD10 code K76.0. NAFLD prevalence was estimated by conducting a systematic literature review of PubMed and then adopting DisMod-MR 2.1 models. The following inclusion criteria were used: 1) a sample size greater than 100; 2) representative of locale or area and sufficient methods; 3) does not exclude comorbidities; 4) NAFLD diagnosed by ultrasound (USS) or other imaging diagnostic. Any hospital or claims data which severely underestimated NAFLD prevalence were excluded. Data were outliered or excluded if we found they differed significantly when compared to the regional, super-regional, or global rates. Studies using serum diagnostics or fatty liver indices and scores to diagnose NAFLD were also excluded. We also retrieved data from the National Human Development Index (HDI), a composite index created by the World Bank ([www.worldbank.org](http://www.worldbank.org)) that measures average achievement in three basic dimensions of human development—a long and healthy life, knowledge, and a decent standard of living. To assess secular trends in NAFLD risk factors, we retrieved prevalence data for type II diabetes from the GBD online database and prevalence data for obesity (and overweight status) from the World Health Organization (WHO) (<http://apps.who.int/gho/data/view.main.GLOBAL2461A?lang=en>). The obesity dataset includes estimates of the prevalence of overweight men and women aged 18 and over by country, region, and globally. A person is defined as overweight if they have a body mass index (BMI) equal to or greater than 25. BMI is calculated by dividing a person's weight in kilograms by his or her height in meters. We retrieved data spanning 1990 to 2016.

Estimated annual percentage change (EAPC) was used to quantify trends in the prevalence of NAFLD, stratified by sex, nation, and age, between 1990 and 2017. As described elsewhere, EAPC can be calculated using a regression line fitted to the natural logarithm of the rates, i.e.,  $y = \alpha + \beta x + \varepsilon$ , where  $y = \ln(\text{rate})$ , and  $x = \text{calendar year}$ .<sup>11</sup> All statistical analyses were performed using the R program (Version 3.3.3, R core team, Vienna, Austria). A *P*-value of less than 0.05 was considered statistically significant.

**Patient and public involvement:** No patients or members of the public were involved in designing, conducting, reporting on, or dissemination information related to our research

## Results

### *Prevalence in case numbers and prevalence rates of NAFLD globally*

Worldwide, the prevalence of NAFLD increased from 391.2 million in 1990 to 882.1 million in 2017, with the prevalence rate increasing from 8.2% to 10.9% during this same period (EAPC = 1.05, 95% CI 1.04, 1.07,  $P < 0.001$ ) (Table 1; Figures 1, 2). Males accounted for approximately two-thirds of all cases; however, females experienced a greater increase in NAFLD prevalence than males (Table 1). All five SDI regions saw increases in both NAFLD prevalence in case numbers and prevalence rate. The most pronounced increase was in the high-middle SDI region, with the greatest prevalence seen in 2017 (Table 1; Figures 1, 2). The increasing trends in both NAFLD prevalence in absolute case numbers and in prevalence rates were consistent across different age groups. Younger people (aged 15-49 years) accounted for nearly 50% of the total number of cases and accounted for the greatest increase in NAFLD prevalence between 1990 and 2017 (EAPC = 1.25, 95% CI 1.22, 1.28,  $P < 0.001$ ) (Table 1).

### *Prevalence in case numbers and prevalence rates of NAFLD regionally*

A total of 21 GBD regions were included in our analysis. The prevalence in terms of case numbers was highest in East Asia, followed by South Asia, then North Africa and the Middle East. In these three regions, absolute case numbers exceeded 0.1 billion in 2017. The highest NAFLD prevalence was observed in North Africa and the Middle East (19.3%), followed by Oceania, Southeast Asia, and Central Latin America (Table 1). Between 1990 and 2017, all 21 regions experienced significant increases in NAFLD prevalence (Figure 3). The greatest increase was detected in Western Europe, followed by Tropical Latin America and then High-income North America (Table 1; Figure 3).

### *Prevalence in case numbers and prevalence rates of NAFLD nationally*

Globally, NAFLD prevalence varied from country to country, ranging from 5.2% in Rwanda to 24.9% in Qatar in 2017 (Figure 4A). The highest prevalence rates were observed in Qatar, Kuwait, Saudi Arabia, and Oman. Relatively lower prevalence was

found in parts of Africa and Europe, including Uganda, Mozambique, France, and Denmark. China, India, Indonesia, Brazil, and the United States had the heaviest burden of NAFLD in terms of absolute case numbers, with case numbers above 20 million in each of these five countries (Figure 4B). Between 1990 and 2017, nearly all countries or territories experienced a significant increase in NAFLD prevalence rates (Figure 4C). The greatest increase was observed in Oman (EAPC = 2.12, 95% CI 1.97, 2.26,  $P < 0.001$ ), followed by Finland, Equatorial Guinea, and Nicaragua (Figure 4C; S-Table). Only one country, Bulgaria, remained stable in terms of NAFLD prevalence for the study period. These increasing trends were consistent across both sexes and all three age groups at national levels (S-Table).

### ***Correlations between NAFLD prevalence and risk factors***

We assessed the correlations between NAFLD prevalence and the prevalence of overweight and diabetic status at the national level (Figure S1). There were significant positive correlations between these categories, with a  $\rho$  of 0.664 and 0.354, respectively. We also tested the correlations for EAPCs of NAFLD prevalence with HDIs at the national level. As shown in Figure 5A, we found a significant positive correlation between these two indices ( $\rho = 0.310$ ,  $P < 0.001$ ). Over the last three decades, more than 90% of countries or territories experienced a significant increase in overweight prevalence, while more than 80% experienced increases in diabetes prevalence. This positive correlation was observed between temporal trends in NAFLD and the same trends in overweight status and diabetes (Figures 5B, C).

### **Discussion**

NAFLD and its histological subtype, nonalcoholic steatohepatitis (NASH), have emerged as the most common forms of chronic liver disease in most regions worldwide. This study comprehensively describes NAFLD prevalence and temporal trends in NAFLD prevalence over the past three decades at the global, regional, and national levels. In general, we found that NAFLD prevalence was heterogeneous across the globe, with almost all countries demonstrating significantly increasing trends between 1990 and 2017. These increases have been consistent across sexes and age groups. The highest prevalence overall was observed in countries located in North Africa and the Middle East. The most significant increases in prevalence were observed in Western European countries.

According to a recent study, the estimated prevalence of overweight status was highest in several countries North African and Middle Eastern countries (including Qatar, Libya, and Kuwait) across both sexes.<sup>6</sup> The distribution of overweight status lines up significantly with NAFLD prevalence, as demonstrated in this and other studies.<sup>12</sup> The greatest increase in NAFLD prevalence was found in Western Europe, which may primarily be ascribed to the rapid increase in overweight status in these countries.<sup>6</sup> This striking increase in NAFLD prevalence has prompted investigators to explore the disease's risk factors. So far, well-established risk factors for NAFLD include obesity, type 2 diabetes, an unhealthy diet (e.g., high intake of red meat and processed meat), and physical inactivity.<sup>13-17</sup> Of these, an unhealthy lifestyle is deemed to be the most important contributor to NAFLD.<sup>18</sup> Key lifestyle parameters include an increased intake of glucose, fructose, and saturated fat, induced hepatic de-novo lipogenesis, subclinical inflammation in the adipose tissue and liver, and insulin resistance in adipose tissue, the liver, and skeletal muscle. These parameters are also accompanied by an increased risk of type 2 diabetes.<sup>19</sup>

Additionally, gut dysbiosis, which is induced in most cases by an unhealthy diet, is believed to be a major contributor to the accumulation of fat in the liver and to the pathogenesis of NASH. There is a set of clinical trials currently underway that focuses on liver-specific and extrahepatic targets, including the microbiome and gut-liver signaling axis, as well as other organs that contribute to metabolic syndrome, especially muscle and adipose tissue.<sup>20</sup> Although there is a great deal of activity in terms of drug development targeting NASH—for example, with an FXR agonist (obeticholic acid), a PPAR $\alpha$  and PPAR $\delta$  agonist (elafibrinor), and a CCR2 and CCR5 antagonist (cencriviroc)—it is too early to prioritize these drugs or mechanisms based on which seems most promising. It will take time to translate the findings of all these studies into long-term safety and efficacy.<sup>20</sup> For these reasons, the primary preventative steps in terms of the abovementioned risk factors, including adherence to a healthy lifestyle and maintaining a healthy BMI, remain the optimal approach to preventing NAFLD.

Our study found that approximately 0.9 billion people suffered from NAFLD in 2017. What sets NAFLD apart from other common liver diseases is the sheer number of patients worldwide. Unfortunately, we also observed increasing trends in NAFLD

prevalence globally. Consequently, the complications and sequelae of NAFLD might also be on the rise. For example, this increasing prevalence of NAFLD is accompanied by increasing prevalence of other non-communicable diseases, including cardiovascular disease, obesity-associated and type 2 diabetes-associated cancer, and advanced liver diseases like hepatic cirrhosis and HCC.<sup>21</sup> As the clinical consequences of NAFLD grow, so too will the economic repercussions. One model based on the populations of the United States and four European countries (Germany, France, Italy, and the United Kingdom) estimated the annual burden associated with all incident and prevalent NAFLD cases at \$103 billion USD in the United States (or \$1,613 per patient) and €35 billion in these four European countries (from €354 to €1,163 per patient).<sup>22</sup> Unfortunately, as our results show, we found significant increases in both obesity and diabetes prevalence in most countries over the last decade. If the annual rate of increase in NAFLD-related costs parallels annual growth in the prevalence of obesity—and taking into account an aging population—then the expected 10-year burden for NAFLD could increase to an estimated \$1.005 trillion USD in the United States and €334 billion in these Europe countries.<sup>22</sup> Interestingly, we also found a significant positive correlation between national HDI and increase magnitude in NAFLD prevalence. This result suggests a striking increase in NAFLD risk factors, particularly in developed countries; these factors likely include an ever-growing aging population, physical inactivity, increases in consumption of red meat and processed meat, and other unhealthy lifestyles choices that contribute to NAFLD.<sup>16,23</sup> Given the observable increases in obesity and diabetes prevalence, NAFLD prevalence is anticipated to continue to increase in the near future if no effective interventions are introduced.<sup>3</sup> Moreover, this persistent increase in NAFLD also indicates an increasing need for medical facilities and improved health systems in these countries, given that more NAFLD patients will continue to be diagnosed.

NAFLD prevalence has also persistently increased in developing regions, including the sub-Saharan Africa, a region where NAFLD had previously been a less frequent diagnosis. This increase might be ascribed to the increasing availability of health care and the concomitant rise in accurate NAFLD diagnosis, as well as to transitions in lifestyle. Increased awareness and urgent action is needed if we want to control the NAFLD pandemic worldwide. Specifically, 1) our governments should play a strong leadership role in reinforcing the importance of addressing obesity and establishing

more effective prevention strategies; 2) funds should be allocated specifically to create a culture that promotes healthy eating and an active lifestyle, especially for children and adolescents; 3) we must create multifaceted interventions aimed at motivating behavioral changes, including setting-based health promotion and education programs (e.g., in preschools, schools, workplaces, religious settings, and hospitals), mass media campaigns, social marketing to share knowledge and skills within our communities, and routine primary health care and counseling appointments to facilitate obesity prevention and management.<sup>24</sup>

Our study has several limitations that should be noted. First, the data we used were derived from mathematical models rather than surveillance. Differences in data processing approaches between the GBD study and previous studies might also contribute to disparities in the NAFLD prevalence rates proposed in our study when compared with those from previous meta-analyses.<sup>4,25</sup> For example, Younossi et al. reported that the global prevalence of NAFLD derived from a meta-analysis was 25.24%, which is significantly higher than the estimates in our study.<sup>4</sup> We assume that this difference can be explained as follows: 1) Most studies included in the meta-analysis were conducted in Europe, Asia, and North America, where NAFLD prevalence is relatively high. In Africa and Australia, where NAFLD is not a major public health concern, studies on NAFLD are rare. However, in the GBD study, NAFLD prevalence was estimated from country to country using mathematical models; 2) The GBD study included a wider study population, ranging in age from 0 years to  $\geq 85$  years old. Children, adolescents, and young adults are relatively less afflicted by NAFLD than middle-aged people and elderly people;<sup>26</sup> and 3) To ensure the robustness of its estimates, NAFLD prevalence rates that were significantly higher than the regional, super-regional, or global rates were excluded from the GBD study.

Secondly, NAFLD is a complex and heterogeneous disease. The scarcity of histological and stage data in the GBD database made it difficult to describe the NAFLD disease burden in detail. This type of descriptive study also lacks information at the individual level. For example, the GBD study did not include information on hepatic fibrosis evaluations, which are a key determinant of NAFLD outcomes. Future studies assessing the NAFLD disease burden should also take these histological and pathological data



into account. Third, NAFLD prevalence was estimated using a mathematical model that included patients who were diagnosed only by ultrasound or another imaging diagnostic tool. Since there are few effective diagnostic methods available in daily clinical practice—and because we excluded NAFLD diagnosed using other methods (e.g., noninvasive scores)—our data may underestimate the NAFLD disease burden.

In summary, NAFLD prevalence is increasing worldwide and the disease is being diagnosed in all parts of the world. The highest prevalence was observed in North Africa and the Middle East, while the greatest increase was detected in Western Europe and North America. This dramatic and significant increase in NAFLD prevalence is alarming and suggests that NAFLD has emerged as a new public health concern worldwide. More efficient prevention strategies are urgently needed.

## References

1. Younossi Z, Tacke F, Arrese M, et al. Global Perspectives on Nonalcoholic Fatty Liver Disease and Nonalcoholic Steatohepatitis. *Hepatology* 2019;69:2672-2682.
2. Younossi Z, Anstee QM, Marietti M, et al. Global burden of NAFLD and NASH: trends, predictions, risk factors and prevention. *Nat Rev Gastroenterol Hepatol* 2018;15:11-20.
3. Estes C, Razavi H, Loomba R, et al. Modeling the epidemic of nonalcoholic fatty liver disease demonstrates an exponential increase in burden of disease. *Hepatology* 2018;67:123-133.
4. Younossi ZM, Koenig AB, Abdelatif D, et al. Global epidemiology of nonalcoholic fatty liver disease-Meta-analytic assessment of prevalence, incidence, and outcomes. *Hepatology* 2016;64:73-84.
5. Worldwide trends in diabetes since 1980: a pooled analysis of 751 population-based studies with 4.4 million participants. *Lancet* 2016;387:1513-1530.
6. Ng M, Fleming T, Robinson M, et al. Global, regional, and national prevalence of overweight and obesity in children and adults during 1980-2013: a systematic analysis for the Global Burden of Disease Study 2013. *Lancet* 2014;384:766-81.
7. Xanthakos SA, Jenkins TM, Kleiner DE, et al. High Prevalence of Nonalcoholic Fatty Liver Disease in Adolescents Undergoing Bariatric Surgery. *Gastroenterology* 2015;149:623-34.e8.
8. Lazarus JV, Ekstedt M, Marchesini G, et al. A cross-sectional study of the public health response to non-alcoholic fatty liver disease in Europe. *J Hepatol* 2019.
9. Global Burden of Disease Collaborative Network. Global Burden of Disease Study 2017 (GBD 2017) Results. Seattle, United States: Institute for Health Metrics and Evaluation (IHME), 2018. Available from <http://ghdx.healthdata.org/gbd-results-tool>.
10. GBD Disease, Injury, Incidence, Prevalence, Collaborators. Global, regional, and national incidence, prevalence, and years lived with disability for 354 diseases and injuries for 195 countries and territories, 1990-2017: a systematic analysis for the Global Burden of Disease Study 2017. *Lancet (London, England)* 2018;392:1789-1858.
11. Liu Z, Jiang Y, Yuan H, et al. The trends in incidence of primary liver cancer caused by specific etiologies: Results from the Global Burden of Disease Study 2016 and implications for liver cancer prevention. *J Hepatol* 2019;70:674-683.
12. Polyzos SA, Kountouras J, Mantzoros CS. Obesity and nonalcoholic fatty liver disease: From pathophysiology to therapeutics. *Metabolism* 2019;92:82-97.
13. Lu FB, Hu ED, Xu LM, et al. The relationship between obesity and the severity of non-alcoholic fatty liver disease: systematic review and meta-analysis. *Expert Rev Gastroenterol Hepatol* 2018;12:491-502.

14. Ayonrinde OT, Oddy WH, Adams LA, et al. Infant nutrition and maternal obesity influence the risk of non-alcoholic fatty liver disease in adolescents. *J Hepatol* 2017;67:568-576.
15. Cusi K, Sanyal AJ, Zhang S, et al. Non-alcoholic fatty liver disease (NAFLD) prevalence and its metabolic associations in patients with type 1 diabetes and type 2 diabetes. *Diabetes Obes Metab* 2017;19:1630-1634.
16. Zelber-Sagi S, Ivancovsky-Wajcman D, Fliss Isakov N, et al. High red and processed meat consumption is associated with non-alcoholic fatty liver disease and insulin resistance. *J Hepatol* 2018;68:1239-1246.
17. Mitchell T, McKinnon E, Ayonrinde O, et al. Decreased Physical Working Capacity in Adolescents With Nonalcoholic Fatty Liver Disease Associates With Reduced Iron Availability. *Clin Gastroenterol Hepatol* 2019.
18. Stefan N, Haring HU, Cusi K. Non-alcoholic fatty liver disease: causes, diagnosis, cardiometabolic consequences, and treatment strategies. *Lancet Diabetes Endocrinol* 2019;7:313-324.
19. Stefan N, Kantartzis K, Haring HU. Causes and metabolic consequences of Fatty liver. *Endocr Rev* 2008;29:939-60.
20. Friedman SL, Neuschwander-Tetri BA, Rinella M, et al. Mechanisms of NAFLD development and therapeutic strategies. *Nature medicine* 2018;24:908-922.
21. Younossi ZM, Otgonsuren M, Henry L, et al. Association of nonalcoholic fatty liver disease (NAFLD) with hepatocellular carcinoma (HCC) in the United States from 2004 to 2009. *Hepatology* 2015;62:1723-30.
22. Younossi ZM, Blissett D, Blissett R, et al. The economic and clinical burden of nonalcoholic fatty liver disease in the United States and Europe. *Hepatology* 2016;64:1577-1586.
23. Kim D, Vazquez-Montesino LM, Li AA, et al. Inadequate Physical Activity and Sedentary Behavior Are Independent Predictors of Nonalcoholic Fatty Liver Disease. *Hepatology* 2020.
24. Zhang G, Cao F, Shi L, et al. Contribution of high body mass index and alcohol use to liver cancer-related mortality: A study based on 195 countries or territories. *Dig Liver Dis* 2019.
25. Zhou F, Zhou J, Wang W, et al. Unexpected Rapid Increase in the Burden of NAFLD in China From 2008 to 2018: A Systematic Review and Meta-Analysis. *Hepatology* 2019;70:1119-1133.
26. Anderson EL, Howe LD, Jones HE, et al. The Prevalence of Non-Alcoholic Fatty Liver Disease in Children and Adolescents: A Systematic Review and Meta-Analysis. *PLoS One* 2015;10:e0140908.

**Abbreviations:** NAFLD, Nonalcoholic fatty liver disease; EAPC, estimated average percentage change; GBD, global burden of disease.

**Contributors:** Study conception and design: J.J., X.G., and M.W.; Data collection: X.G., Y.D., and L.Z.; Data analyses: X.G., Y.D., and L.Z.; Results interpretations: All authors; Manuscript drafting: X.G., L.Z., and Y.D.; Manuscript proofing: All authors.

### **Funding**

The present study was supported by the National Natural Science Foundation of China (grant no. 81560487) and Department of Science and Technology in Guizhou province QIAN KE HE LH word [2015]7515.

**Ethical approval:** The need for study approval was waived the National Center of Health and Statistics Research ethics review board, because the research relied on

public, deidentified secondary data.

**Data availability statement:** All data are available online via the Global Health Data Exchange (GHDx) query tool (<http://ghdx.healthdata.org/gbd-results-tool>).

**Competing interests:** There are no competing interests for any author

### Figure legends

Figure 1. Changing trends in case numbers for nonalcoholic fatty liver disease between 1990 and 2017, by sex and sociodemographic index.

Figure 2. Temporal trends in the prevalence of nonalcoholic fatty liver disease between 1990 and 2017, by sex and sociodemographic index.

Figure 3. Prevalence trends in nonalcoholic fatty liver disease at the GBD regional level. The error bar denotes a 95% confidence interval.

Figure 4. Age-standardized prevalence rates (A), case numbers (B), and trends (C) in nonalcoholic fatty liver disease between 1990 and 2017 at the national level.

Figure 5. Association of prevalence trends in nonalcoholic fatty liver disease, quantified by estimated average percentage changes (EAPCs), with human development index (A), trends in overweight prevalence (B), and trends in diabetes prevalence (C) at the national level. The correlation coefficient was derived from a Pearson correlation test.

**Table 1. The changing trends of number of prevalent cases and prevalence rate of NAFLD from 1990 to 2017.**

|                                  | 1990                          |                    | 2017                          |                   | 1990-2017*<br>EAPC (95% CI) |
|----------------------------------|-------------------------------|--------------------|-------------------------------|-------------------|-----------------------------|
|                                  | No. of cases<br>(× 1 million) | Prevalence<br>(%)‡ | No. of cases<br>(× 1 million) | Prevalence<br>(%) |                             |
| <b>Overall</b>                   | 391.2                         | 8.2                | 882.1                         | 10.9              | 1.05 (1.04, 1.07)           |
| <b>Sex</b>                       |                               |                    |                               |                   |                             |
| Male                             | 236.4                         | 10.0               | 524.0                         | 13.2              | 1.00 (0.99, 1.02)           |
| Female                           | 154.8                         | 6.4                | 358.1                         | 8.7               | 1.12 (1.10, 1.13)           |
| <b>Socio-demographical index</b> |                               |                    |                               |                   |                             |
| High                             | 76.2                          | 6.7                | 137.4                         | 9.0               | 1.14 (1.06, 1.21)           |
| High-middle                      | 100.2                         | 9.4                | 224.5                         | 13.1              | 1.21 (1.17, 1.25)           |
| Middle                           | 120.0                         | 9.4                | 282.3                         | 12.2              | 0.94 (0.92, 0.96)           |
| Middle-low                       | 62.3                          | 8.0                | 157.1                         | 10.5              | 1.01 (1.00, 1.02)           |
| Low                              | 30.4                          | 6.5                | 76.2                          | 7.9               | 0.74 (0.70, 0.79)           |
| <b>Age (years)†</b>              |                               |                    |                               |                   |                             |
| 15-49                            | 241.5                         | 8.8                | 489.1                         | 12.5              | 1.25 (1.22, 1.28)           |
| 50-69                            | 109.1                         | 15.9               | 281.5                         | 21.4              | 1.06 (1.04, 1.08)           |
| ≥70                              | 40.7                          | 20.0               | 111.4                         | 25.7              | 0.93 (0.89, 0.96)           |
| <b>GBD Region</b>                |                               |                    |                               |                   |                             |
| Andean Latin America             | 2.5                           | 8.8                | 7.1                           | 12.0              | 1.13 (1.10, 1.16)           |
| Australasia                      | 1.5                           | 6.4                | 3.1                           | 8.6               | 1.16 (1.04, 1.28)           |
| Caribbean                        | 2.8                           | 9.2                | 5.8                           | 11.7              | 1.03 (0.98, 1.07)           |
| Central Asia                     | 3.8                           | 6.7                | 7.4                           | 8.5               | 0.91 (0.81, 1.01)           |
| Central Europe                   | 9.5                           | 6.7                | 13.1                          | 8.0               | 0.70 (0.67, 0.73)           |
| Central Latin America            | 12.7                          | 10.5               | 36.5                          | 14.4              | 1.17 (1.14, 1.21)           |
| Central Sub-Saharan Africa       | 2.3                           | 6.5                | 6.2                           | 7.5               | 0.58 (0.50, 0.67)           |
| East Asia                        | 111.8                         | 9.6                | 242.8                         | 12.6              | 0.88 (0.82, 0.95)           |
| Eastern Europe                   | 18.4                          | 7.0                | 23.7                          | 8.4               | 0.73 (0.64, 0.82)           |

|                              |      |      |       |      |                   |
|------------------------------|------|------|-------|------|-------------------|
| Eastern Sub-Saharan Africa   | 7.1  | 6.0  | 18.0  | 7.0  | 0.58 (0.55, 0.60) |
| High-income Asia Pacific     | 11.4 | 5.7  | 18.7  | 7.0  | 0.78 (0.75, 0.82) |
| High-income North America    | 23.1 | 7.2  | 44.0  | 9.6  | 1.17 (1.06, 1.29) |
| North Africa and Middle East | 35.0 | 14.3 | 108.0 | 19.3 | 1.12 (1.10, 1.15) |
| Oceania                      | 0.6  | 12.8 | 1.6   | 16.3 | 0.90 (0.87, 0.92) |
| South Asia                   | 53.6 | 6.4  | 131.2 | 8.0  | 0.81 (0.78, 0.83) |
| Southeast Asia               | 39.5 | 10.9 | 98.5  | 14.5 | 1.12 (1.08, 1.15) |
| Southern Latin America       | 3.1  | 6.5  | 6.3   | 8.6  | 1.05 (1.01, 1.08) |
| Southern Sub-Saharan Africa  | 3.7  | 9.3  | 8.1   | 11.4 | 0.73 (0.69, 0.77) |
| Tropical Latin America       | 9.8  | 8.0  | 26.7  | 11.1 | 1.17 (1.15, 1.19) |
| Western Europe               | 30.9 | 6.5  | 52.1  | 8.9  | 1.17 (1.05, 1.29) |
| Western Sub-Saharan Africa   | 8.4  | 6.5  | 23.2  | 8.0  | 0.69 (0.63, 0.75) |

‡, the prevalence has been standardized by age.

†, crude prevalence rate for each age group.

\*, P values of all EAPCs were <0.001.

EAPC, estimated average percentage change; CI, confidence interval.

1  
2  
3  
4  
5  
6  
7  
8  
9  
10  
11  
12  
13  
14  
15  
16  
17  
18  
19  
20  
21  
22  
23  
24  
25  
26  
27  
28  
29  
30  
31  
32  
33  
34  
35  
36  
37  
38  
39  
40  
41  
42  
43  
44  
45  
46  
47  
48  
49  
50  
51  
52  
53  
54  
55  
56  
57  
58  
59  
60

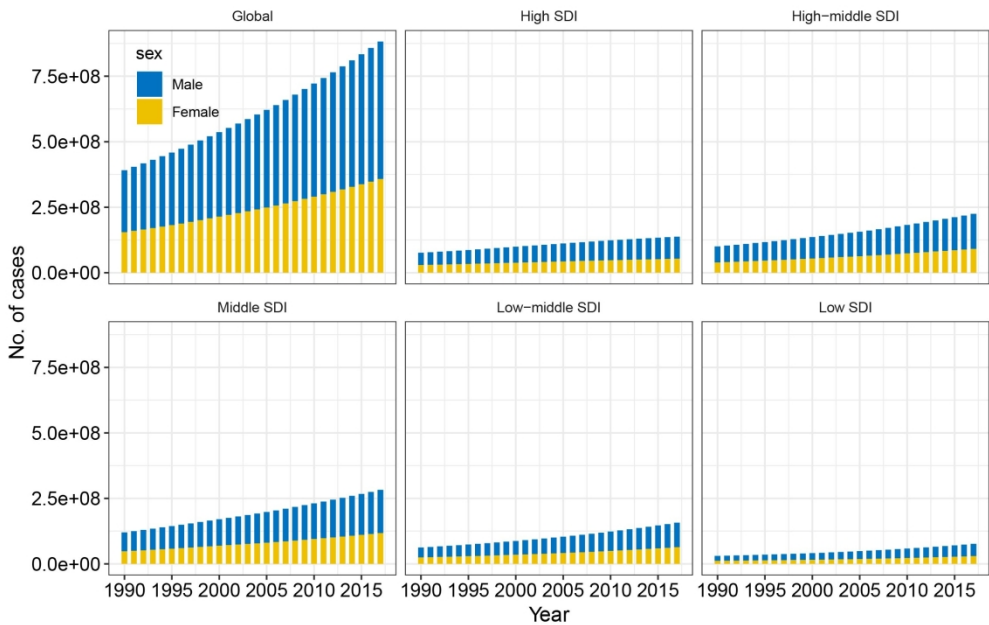

Figure 1

222x142mm (300 x 300 DPI)

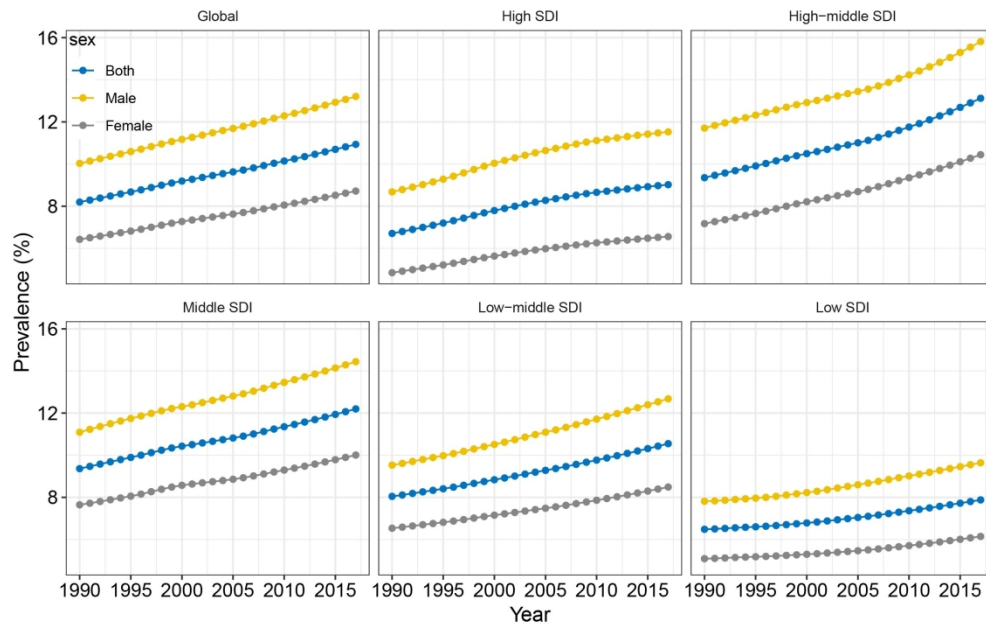

Figure 2

222x142mm (300 x 300 DPI)



1  
2  
3  
4  
5  
6  
7  
8  
9  
10  
11  
12  
13  
14  
15  
16  
17  
18  
19  
20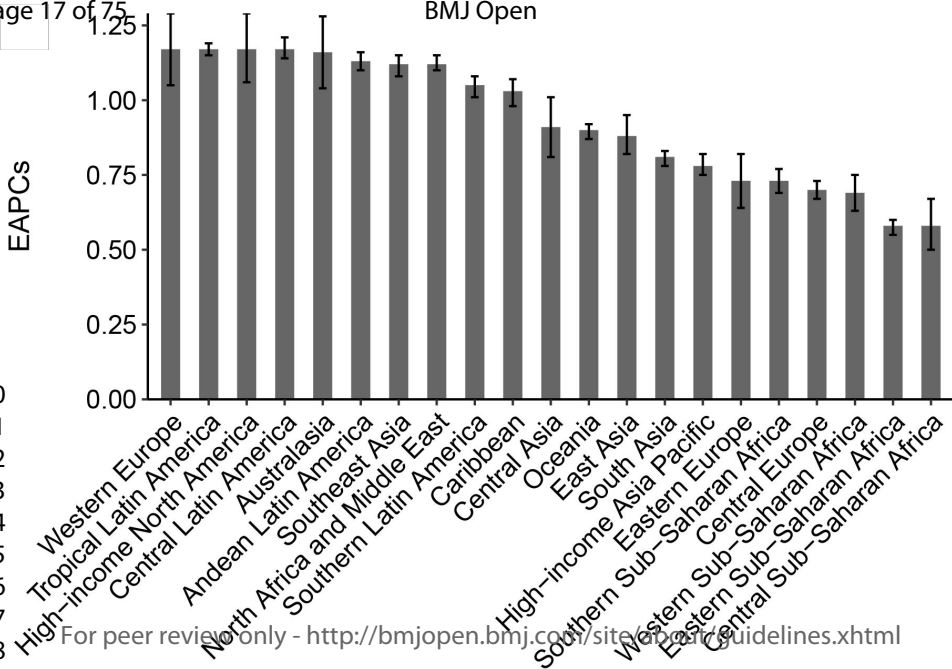

**A**

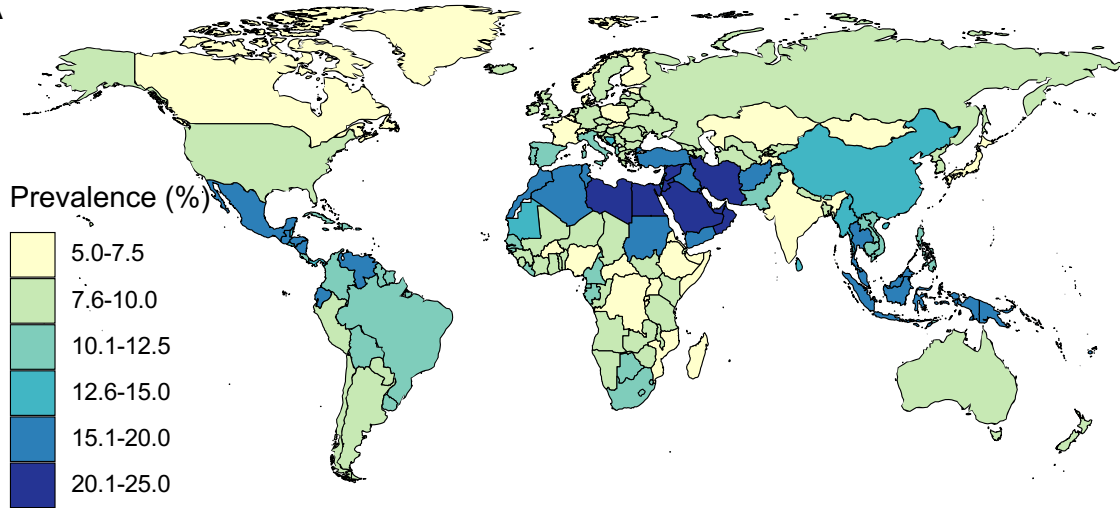

**B**

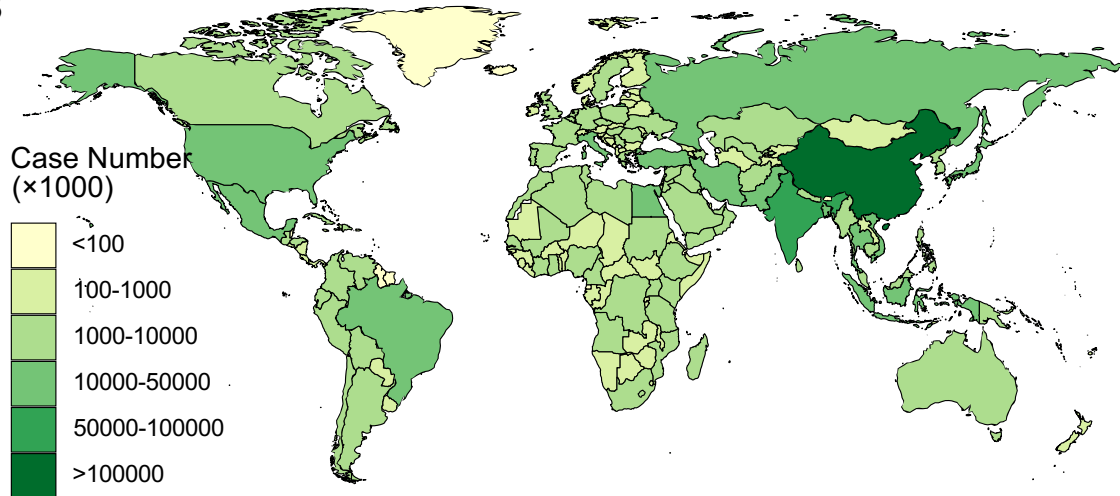

**C**

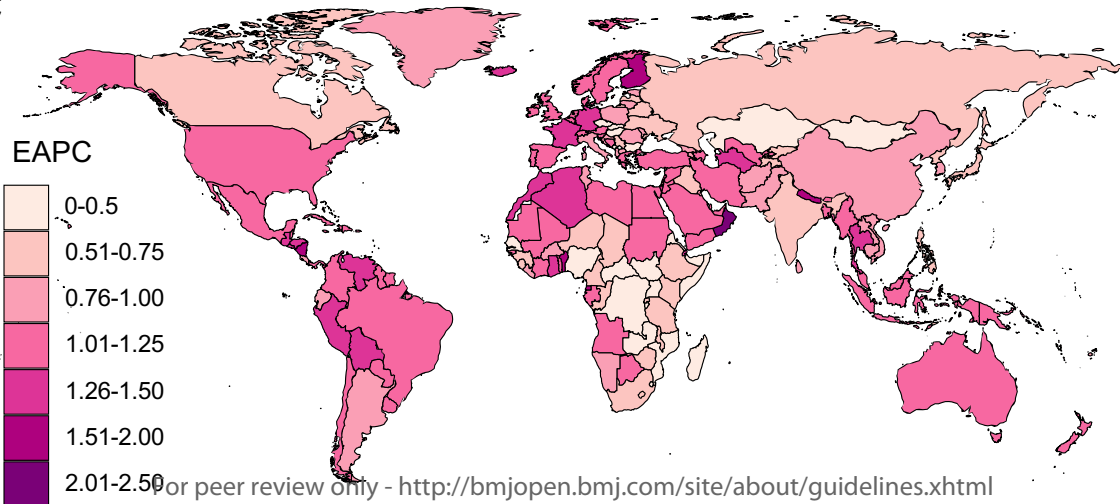

1  
2  
3  
4  
5  
6  
7  
8  
9  
10  
11  
12  
13  
14  
15  
16  
17  
18  
19  
20  
21  
22  
23  
24  
25  
26  
27  
28  
29  
30  
31  
32  
33  
34  
35  
36  
37  
38  
39  
40  
41  
42  
43  
44  
45  
46  
47  
48  
49  
50

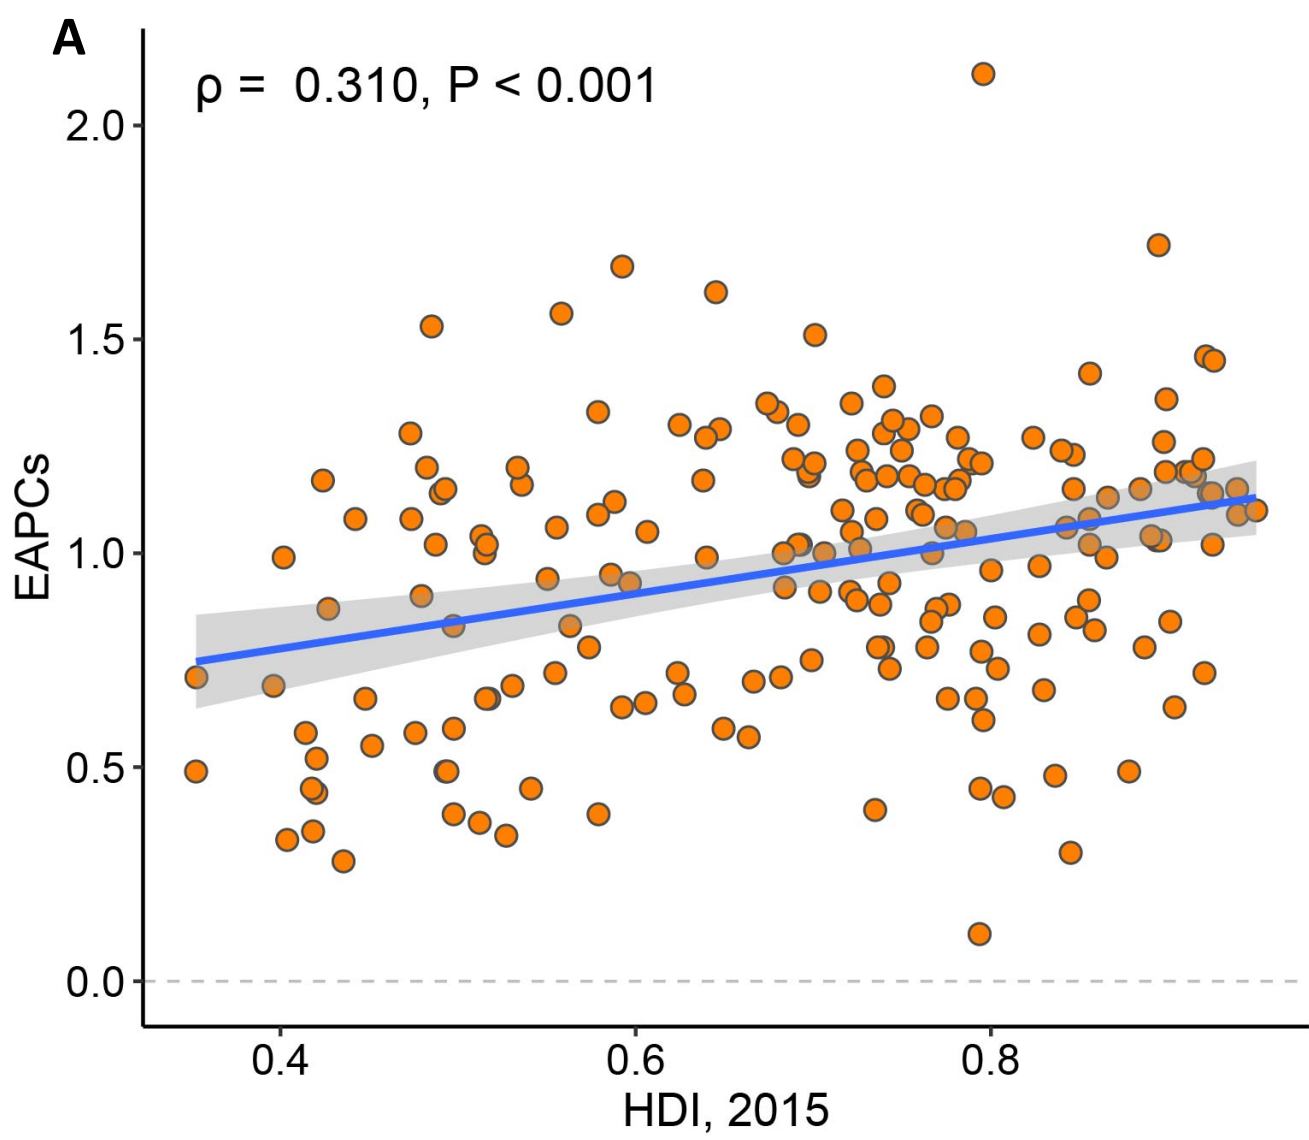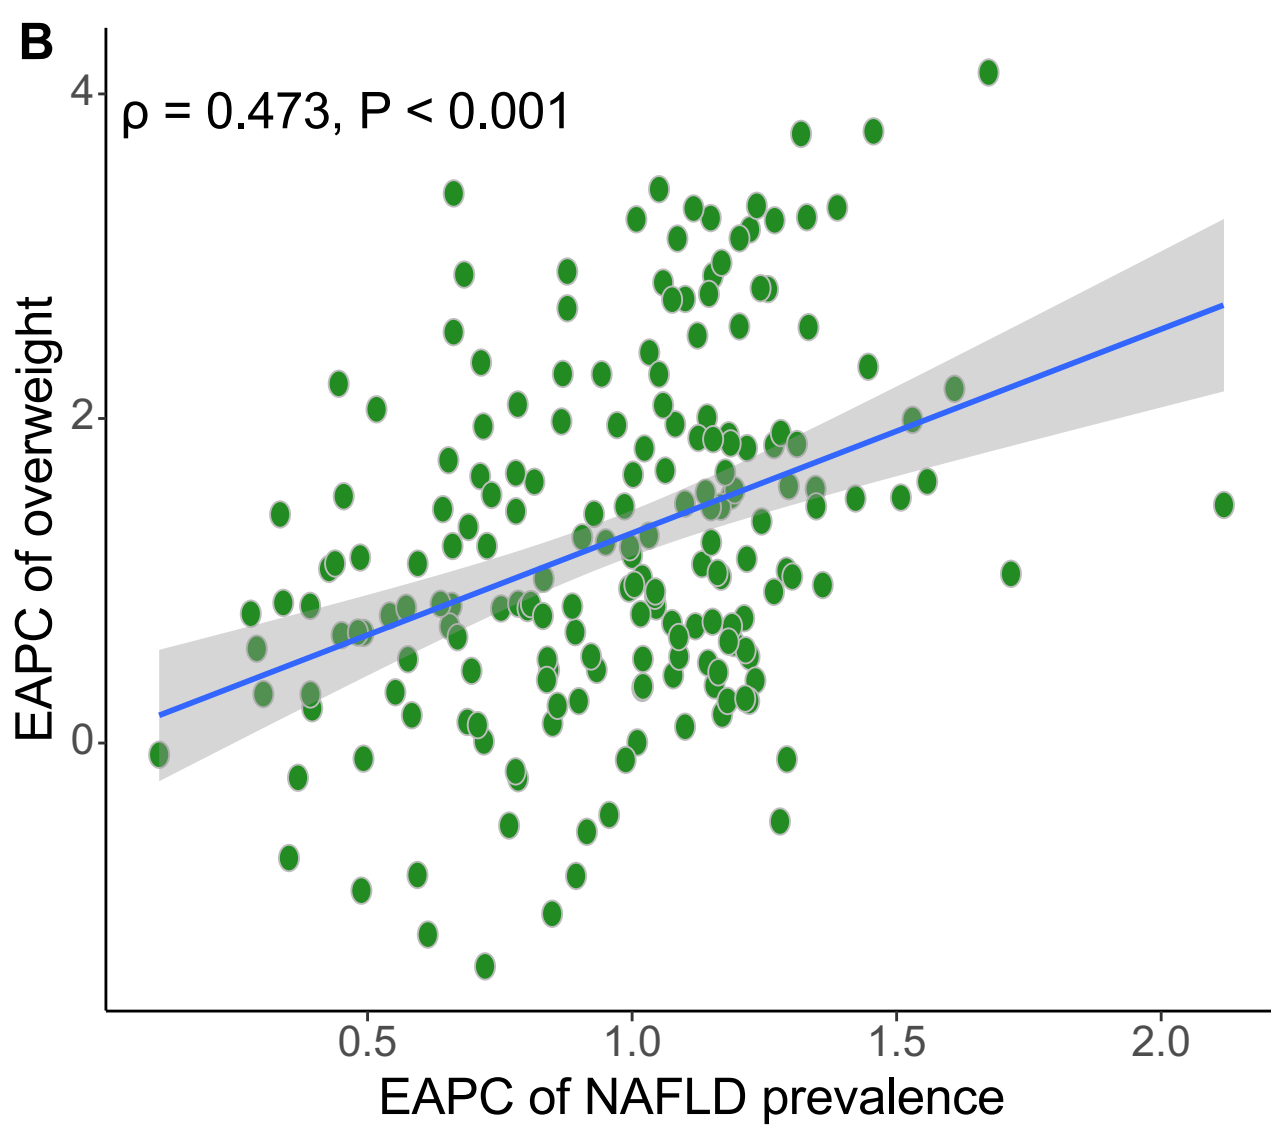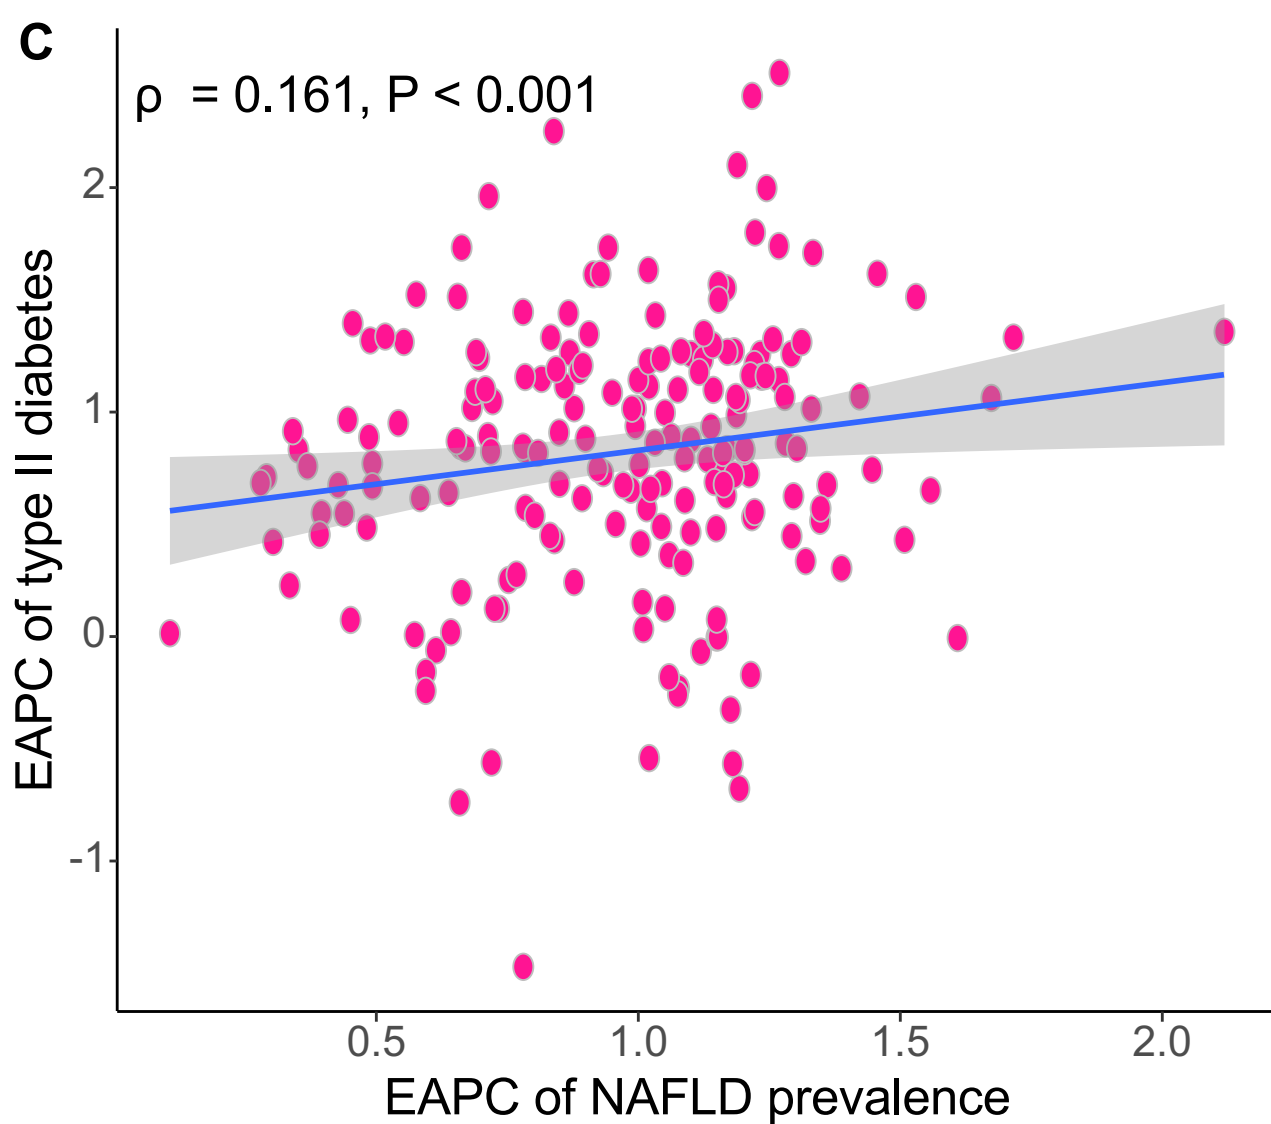

S-TABLE. The EAPCs of NAFLD prevalence at the national level, by sex and age.

| location                   | sex    | age              | eapcs | los  | ups  | pvalue |
|----------------------------|--------|------------------|-------|------|------|--------|
| North Korea                | Male   | All Ages         | 1.44  | 1.35 | 1.53 | 0      |
| North Korea                | Male   | 15-49 years      | 0.78  | 0.74 | 0.81 | 0      |
| North Korea                | Male   | 50-69 years      | 0.65  | 0.62 | 0.68 | 0      |
| North Korea                | Male   | 70+ years        | 0.53  | 0.49 | 0.58 | 0      |
| North Korea                | Male   | Age-standardized | 0.58  | 0.55 | 0.61 | 0      |
| North Korea                | Female | All Ages         | 1.62  | 1.57 | 1.67 | 0      |
| North Korea                | Female | 15-49 years      | 1.11  | 1.09 | 1.13 | 0      |
| North Korea                | Female | 50-69 years      | 0.81  | 0.81 | 0.82 | 0      |
| North Korea                | Female | 70+ years        | 0.71  | 0.68 | 0.73 | 0      |
| North Korea                | Female | Age-standardized | 0.75  | 0.73 | 0.77 | 0      |
| North Korea                | Both   | All Ages         | 1.55  | 1.48 | 1.62 | 0      |
| North Korea                | Both   | 15-49 years      | 0.99  | 0.97 | 1.01 | 0      |
| North Korea                | Both   | 50-69 years      | 0.77  | 0.75 | 0.79 | 0      |
| North Korea                | Both   | 70+ years        | 0.68  | 0.64 | 0.71 | 0      |
| Oman                       | Both   | Age-standardized | 2.12  | 1.97 | 2.26 | 0      |
| Taiwan (Province of China) | Male   | All Ages         | 2.3   | 2.25 | 2.36 | 0      |
| Taiwan (Province of China) | Male   | 15-49 years      | 1.48  | 1.42 | 1.54 | 0      |
| Taiwan (Province of China) | Male   | 50-69 years      | 1.12  | 1.08 | 1.15 | 0      |
| Taiwan (Province of China) | Male   | 70+ years        | 0.82  | 0.78 | 0.86 | 0      |
| Taiwan (Province of China) | Male   | Age-standardized | 1.11  | 1.07 | 1.16 | 0      |
| Taiwan (Province of China) | Female | All Ages         | 2.96  | 2.85 | 3.06 | 0      |
| Taiwan (Province of China) | Female | 15-49 years      | 1.93  | 1.83 | 2.03 | 0      |
| Taiwan (Province of China) | Female | 50-69 years      | 1.48  | 1.42 | 1.55 | 0      |
| Taiwan (Province of China) | Female | 70+ years        | 1.24  | 1.15 | 1.32 | 0      |
| Taiwan (Province of China) | Female | Age-standardized | 1.45  | 1.36 | 1.54 | 0      |
| Taiwan (Province of China) | Both   | All Ages         | 2.54  | 2.47 | 2.62 | 0      |
| Taiwan (Province of China) | Both   | 15-49 years      | 1.64  | 1.57 | 1.72 | 0      |
| Taiwan (Province of China) | Both   | 50-69 years      | 1.21  | 1.15 | 1.27 | 0      |
| Taiwan (Province of China) | Both   | 70+ years        | 0.91  | 0.85 | 0.97 | 0      |
| Finland                    | Both   | Age-standardized | 1.72  | 1.56 | 1.87 | 0      |
| Armenia                    | Male   | All Ages         | 1.92  | 1.88 | 1.96 | 0      |
| Armenia                    | Male   | 15-49 years      | 1.05  | 0.95 | 1.16 | 0      |
| Armenia                    | Male   | 50-69 years      | 0.41  | 0.29 | 0.54 | 0      |
| Armenia                    | Male   | 70+ years        | 0.87  | 0.8  | 0.94 | 0      |
| Armenia                    | Male   | Age-standardized | 0.8   | 0.72 | 0.88 | 0      |
| Armenia                    | Female | All Ages         | 2.17  | 2.11 | 2.24 | 0      |
| Armenia                    | Female | 15-49 years      | 1.1   | 1.03 | 1.17 | 0      |
| Armenia                    | Female | 50-69 years      | 0.78  | 0.66 | 0.9  | 0      |
| Armenia                    | Female | 70+ years        | 1.24  | 1.19 | 1.29 | 0      |
| Armenia                    | Female | Age-standardized | 1.04  | 0.96 | 1.12 | 0      |
| Armenia                    | Both   | All Ages         | 2.06  | 2    | 2.11 | 0      |
| Armenia                    | Both   | 15-49 years      | 1.08  | 0.99 | 1.17 | 0      |
| Armenia                    | Both   | 50-69 years      | 0.61  | 0.49 | 0.73 | 0      |
| Armenia                    | Both   | 70+ years        | 1.11  | 1.06 | 1.16 | 0      |
| Equatorial Guinea          | Both   | Age-standardized | 1.67  | 1.55 | 1.8  | 0      |
| Andorra                    | Male   | All Ages         | 1.24  | 1.08 | 1.4  | 0      |
| Andorra                    | Male   | 15-49 years      | 1.12  | 0.96 | 1.29 | 0      |
| Andorra                    | Male   | 50-69 years      | 0.82  | 0.72 | 0.91 | 0      |
| Andorra                    | Male   | 70+ years        | 0.49  | 0.41 | 0.57 | 0      |
| Andorra                    | Male   | Age-standardized | 0.84  | 0.74 | 0.94 | 0      |
| Andorra                    | Female | All Ages         | 1.55  | 1.38 | 1.73 | 0      |
| Andorra                    | Female | 15-49 years      | 1.3   | 1.14 | 1.46 | 0      |
| Andorra                    | Female | 50-69 years      | 0.95  | 0.83 | 1.06 | 0      |
| Andorra                    | Female | 70+ years        | 0.78  | 0.66 | 0.91 | 0      |

|    |                    |        |                  |      |      |      |   |
|----|--------------------|--------|------------------|------|------|------|---|
| 1  |                    |        |                  |      |      |      |   |
| 2  | Andorra            | Female | Age-standardized | 0.97 | 0.86 | 1.09 | 0 |
| 3  | Andorra            | Both   | All Ages         | 1.27 | 1.11 | 1.44 | 0 |
| 4  | Andorra            | Both   | 15-49 years      | 1.08 | 0.93 | 1.23 | 0 |
| 5  | Andorra            | Both   | 50-69 years      | 0.85 | 0.73 | 0.98 | 0 |
| 6  | Andorra            | Both   | 70+ years        | 0.52 | 0.42 | 0.61 | 0 |
| 7  | Nicaragua          | Both   | Age-standardized | 1.61 | 1.53 | 1.69 | 0 |
| 8  | Bhutan             | Male   | All Ages         | 2.19 | 2.14 | 2.24 | 0 |
| 9  | Bhutan             | Male   | 15-49 years      | 1.37 | 1.32 | 1.42 | 0 |
| 10 | Bhutan             | Male   | 50-69 years      | 0.92 | 0.9  | 0.95 | 0 |
| 11 | Bhutan             | Male   | 70+ years        | 0.92 | 0.9  | 0.94 | 0 |
| 12 | Bhutan             | Male   | Age-standardized | 0.98 | 0.94 | 1.01 | 0 |
| 13 | Bhutan             | Female | All Ages         | 2.1  | 2.06 | 2.15 | 0 |
| 14 | Bhutan             | Female | 15-49 years      | 1.3  | 1.24 | 1.36 | 0 |
| 15 | Bhutan             | Female | 50-69 years      | 1.05 | 1.01 | 1.08 | 0 |
| 16 | Bhutan             | Female | 70+ years        | 1.14 | 1.12 | 1.16 | 0 |
| 17 | Bhutan             | Female | Age-standardized | 1.09 | 1.06 | 1.11 | 0 |
| 18 | Bhutan             | Both   | All Ages         | 2.17 | 2.13 | 2.21 | 0 |
| 19 | Bhutan             | Both   | 15-49 years      | 1.38 | 1.33 | 1.42 | 0 |
| 20 | Bhutan             | Both   | 50-69 years      | 0.98 | 0.95 | 1    | 0 |
| 21 | Bhutan             | Both   | 70+ years        | 1    | 0.96 | 1.04 | 0 |
| 22 | Nepal              | Both   | Age-standardized | 1.56 | 1.4  | 1.72 | 0 |
| 23 | Dominican Republic | Male   | All Ages         | 2.1  | 2.02 | 2.18 | 0 |
| 24 | Dominican Republic | Male   | 15-49 years      | 1.34 | 1.27 | 1.42 | 0 |
| 25 | Dominican Republic | Male   | 50-69 years      | 0.92 | 0.84 | 1    | 0 |
| 26 | Dominican Republic | Male   | 70+ years        | 0.72 | 0.64 | 0.81 | 0 |
| 27 | Dominican Republic | Male   | Age-standardized | 0.97 | 0.89 | 1.05 | 0 |
| 28 | Dominican Republic | Female | All Ages         | 2.26 | 2.24 | 2.29 | 0 |
| 29 | Dominican Republic | Female | 15-49 years      | 1.46 | 1.4  | 1.51 | 0 |
| 30 | Dominican Republic | Female | 50-69 years      | 1.08 | 1.05 | 1.1  | 0 |
| 31 | Dominican Republic | Female | 70+ years        | 0.97 | 0.94 | 1    | 0 |
| 32 | Dominican Republic | Female | Age-standardized | 1.1  | 1.08 | 1.12 | 0 |
| 33 | Dominican Republic | Both   | All Ages         | 2.19 | 2.14 | 2.24 | 0 |
| 34 | Dominican Republic | Both   | 15-49 years      | 1.45 | 1.4  | 1.49 | 0 |
| 35 | Dominican Republic | Both   | 50-69 years      | 0.99 | 0.95 | 1.03 | 0 |
| 36 | Dominican Republic | Both   | 70+ years        | 0.81 | 0.76 | 0.86 | 0 |
| 37 | Benin              | Both   | Age-standardized | 1.53 | 1.45 | 1.61 | 0 |
| 38 | Samoa              | Male   | All Ages         | 1.32 | 1.26 | 1.38 | 0 |
| 39 | Samoa              | Male   | 15-49 years      | 1.18 | 1.07 | 1.28 | 0 |
| 40 | Samoa              | Male   | 50-69 years      | 0.67 | 0.63 | 0.71 | 0 |
| 41 | Samoa              | Male   | 70+ years        | 0.59 | 0.55 | 0.63 | 0 |
| 42 | Samoa              | Male   | Age-standardized | 0.78 | 0.74 | 0.82 | 0 |
| 43 | Samoa              | Female | All Ages         | 1.6  | 1.5  | 1.7  | 0 |
| 44 | Samoa              | Female | 15-49 years      | 1.37 | 1.23 | 1.51 | 0 |
| 45 | Samoa              | Female | 50-69 years      | 1.06 | 1    | 1.11 | 0 |
| 46 | Samoa              | Female | 70+ years        | 0.88 | 0.78 | 0.98 | 0 |
| 47 | Samoa              | Female | Age-standardized | 1.07 | 1.01 | 1.14 | 0 |
| 48 | Samoa              | Both   | All Ages         | 1.44 | 1.37 | 1.52 | 0 |
| 49 | Samoa              | Both   | 15-49 years      | 1.26 | 1.14 | 1.38 | 0 |
| 50 | Samoa              | Both   | 50-69 years      | 0.86 | 0.81 | 0.9  | 0 |
| 51 | Samoa              | Both   | 70+ years        | 0.74 | 0.67 | 0.81 | 0 |
| 52 | Maldives           | Both   | Age-standardized | 1.51 | 1.45 | 1.56 | 0 |
| 53 | Malaysia           | Male   | All Ages         | 2.21 | 2.16 | 2.27 | 0 |
| 54 | Malaysia           | Male   | 15-49 years      | 1.32 | 1.28 | 1.35 | 0 |
| 55 | Malaysia           | Male   | 50-69 years      | 1.13 | 1.09 | 1.18 | 0 |
| 56 | Malaysia           | Male   | 70+ years        | 0.94 | 0.9  | 0.97 | 0 |
| 57 | Malaysia           | Male   | Age-standardized | 1.16 | 1.12 | 1.2  | 0 |

|    |          |        |                  |      |      |      |   |
|----|----------|--------|------------------|------|------|------|---|
| 1  |          |        |                  |      |      |      |   |
| 2  | Malaysia | Female | All Ages         | 2.24 | 2.2  | 2.27 | 0 |
| 3  | Malaysia | Female | 15-49 years      | 1.34 | 1.29 | 1.39 | 0 |
| 4  | Malaysia | Female | 50-69 years      | 1.26 | 1.23 | 1.29 | 0 |
| 5  | Malaysia | Female | 70+ years        | 1.18 | 1.14 | 1.23 | 0 |
| 6  | Malaysia | Female | Age-standardized | 1.23 | 1.19 | 1.26 | 0 |
| 7  | Malaysia | Both   | All Ages         | 2.24 | 2.2  | 2.28 | 0 |
| 8  | Malaysia | Both   | 15-49 years      | 1.36 | 1.32 | 1.39 | 0 |
| 9  | Malaysia | Both   | 50-69 years      | 1.2  | 1.16 | 1.23 | 0 |
| 10 | Malaysia | Both   | 70+ years        | 1.08 | 1.04 | 1.12 | 0 |
| 11 | Iceland  | Both   | Age-standardized | 1.46 | 1.35 | 1.56 | 0 |
| 12 | Malta    | Male   | All Ages         | 2.12 | 1.95 | 2.29 | 0 |
| 13 | Malta    | Male   | 15-49 years      | 1.38 | 1.24 | 1.52 | 0 |
| 14 | Malta    | Male   | 50-69 years      | 1.26 | 1.12 | 1.4  | 0 |
| 15 | Malta    | Male   | 70+ years        | 1    | 0.85 | 1.15 | 0 |
| 16 | Malta    | Male   | Age-standardized | 1.29 | 1.13 | 1.46 | 0 |
| 17 | Malta    | Female | All Ages         | 2.46 | 2.28 | 2.64 | 0 |
| 18 | Malta    | Female | 15-49 years      | 1.5  | 1.37 | 1.64 | 0 |
| 19 | Malta    | Female | 50-69 years      | 1.59 | 1.43 | 1.74 | 0 |
| 20 | Malta    | Female | 70+ years        | 1.47 | 1.27 | 1.66 | 0 |
| 21 | Malta    | Female | Age-standardized | 1.52 | 1.34 | 1.69 | 0 |
| 22 | Malta    | Both   | All Ages         | 2.25 | 2.08 | 2.43 | 0 |
| 23 | Malta    | Both   | 15-49 years      | 1.45 | 1.31 | 1.59 | 0 |
| 24 | Malta    | Both   | 50-69 years      | 1.48 | 1.32 | 1.63 | 0 |
| 25 | Malta    | Both   | 70+ years        | 1.23 | 1.08 | 1.39 | 0 |
| 26 | Germany  | Both   | Age-standardized | 1.45 | 1.32 | 1.57 | 0 |
| 27 | Colombia | Male   | All Ages         | 2.17 | 2.14 | 2.21 | 0 |
| 28 | Colombia | Male   | 15-49 years      | 1.37 | 1.31 | 1.44 | 0 |
| 29 | Colombia | Male   | 50-69 years      | 1.05 | 1    | 1.1  | 0 |
| 30 | Colombia | Male   | 70+ years        | 0.85 | 0.79 | 0.9  | 0 |
| 31 | Colombia | Male   | Age-standardized | 1.12 | 1.07 | 1.17 | 0 |
| 32 | Colombia | Female | All Ages         | 2.53 | 2.48 | 2.57 | 0 |
| 33 | Colombia | Female | 15-49 years      | 1.6  | 1.5  | 1.69 | 0 |
| 34 | Colombia | Female | 50-69 years      | 1.24 | 1.19 | 1.29 | 0 |
| 35 | Colombia | Female | 70+ years        | 1.12 | 1.07 | 1.17 | 0 |
| 36 | Colombia | Female | Age-standardized | 1.29 | 1.23 | 1.34 | 0 |
| 37 | Colombia | Both   | All Ages         | 2.34 | 2.3  | 2.37 | 0 |
| 38 | Colombia | Both   | 15-49 years      | 1.48 | 1.41 | 1.56 | 0 |
| 39 | Colombia | Both   | 50-69 years      | 1.12 | 1.07 | 1.17 | 0 |
| 40 | Colombia | Both   | 70+ years        | 0.97 | 0.92 | 1.02 | 0 |
| 41 | Malta    | Both   | Age-standardized | 1.42 | 1.25 | 1.59 | 0 |
| 42 | Iceland  | Male   | All Ages         | 1.9  | 1.78 | 2.01 | 0 |
| 43 | Iceland  | Male   | 15-49 years      | 1.53 | 1.42 | 1.64 | 0 |
| 44 | Iceland  | Male   | 50-69 years      | 1.3  | 1.22 | 1.38 | 0 |
| 45 | Iceland  | Male   | 70+ years        | 1.06 | 0.97 | 1.15 | 0 |
| 46 | Iceland  | Male   | Age-standardized | 1.38 | 1.29 | 1.47 | 0 |
| 47 | Iceland  | Female | All Ages         | 2.08 | 1.96 | 2.2  | 0 |
| 48 | Iceland  | Female | 15-49 years      | 1.68 | 1.56 | 1.8  | 0 |
| 49 | Iceland  | Female | 50-69 years      | 1.46 | 1.36 | 1.55 | 0 |
| 50 | Iceland  | Female | 70+ years        | 1.4  | 1.24 | 1.57 | 0 |
| 51 | Iceland  | Female | Age-standardized | 1.55 | 1.43 | 1.67 | 0 |
| 52 | Iceland  | Both   | All Ages         | 1.96 | 1.84 | 2.08 | 0 |
| 53 | Iceland  | Both   | 15-49 years      | 1.58 | 1.46 | 1.7  | 0 |
| 54 | Iceland  | Both   | 50-69 years      | 1.39 | 1.29 | 1.48 | 0 |
| 55 | Iceland  | Both   | 70+ years        | 1.25 | 1.13 | 1.37 | 0 |
| 56 | Thailand | Both   | Age-standardized | 1.39 | 1.35 | 1.43 | 0 |
| 57 | Spain    | Male   | All Ages         | 1.73 | 1.51 | 1.94 | 0 |



|    |                                  |        |                  |      |      |      |   |
|----|----------------------------------|--------|------------------|------|------|------|---|
| 1  |                                  |        |                  |      |      |      |   |
| 2  | Spain                            | Male   | 15-49 years      | 1.69 | 1.53 | 1.86 | 0 |
| 3  | Spain                            | Male   | 50-69 years      | 1.11 | 0.97 | 1.24 | 0 |
| 4  | Spain                            | Male   | 70+ years        | 0.88 | 0.75 | 1.01 | 0 |
| 5  | Spain                            | Male   | Age-standardized | 1.16 | 1.02 | 1.29 | 0 |
| 6  | Spain                            | Female | All Ages         | 1.67 | 1.47 | 1.87 | 0 |
| 7  | Spain                            | Female | 15-49 years      | 1.6  | 1.45 | 1.75 | 0 |
| 8  | Spain                            | Female | 50-69 years      | 1    | 0.88 | 1.12 | 0 |
| 9  | Spain                            | Female | 70+ years        | 0.99 | 0.84 | 1.15 | 0 |
| 10 | Spain                            | Female | Age-standardized | 1.1  | 0.97 | 1.23 | 0 |
| 11 | Spain                            | Both   | All Ages         | 1.7  | 1.5  | 1.91 | 0 |
| 12 | Spain                            | Both   | 15-49 years      | 1.67 | 1.51 | 1.83 | 0 |
| 13 | Spain                            | Both   | 50-69 years      | 1.07 | 0.94 | 1.2  | 0 |
| 14 | Spain                            | Both   | 70+ years        | 0.95 | 0.81 | 1.1  | 0 |
| 15 | Spain                            | Both   | Age-standardized | 1.36 | 1.24 | 1.48 | 0 |
| 16 | Israel                           | Both   | All Ages         | 2.08 | 2.03 | 2.12 | 0 |
| 17 | China                            | Male   | 15-49 years      | 1.24 | 1.11 | 1.36 | 0 |
| 18 | China                            | Male   | 50-69 years      | 0.82 | 0.74 | 0.9  | 0 |
| 19 | China                            | Male   | 70+ years        | 0.67 | 0.61 | 0.74 | 0 |
| 20 | China                            | Male   | Age-standardized | 0.8  | 0.73 | 0.88 | 0 |
| 21 | China                            | Female | All Ages         | 2.44 | 2.39 | 2.49 | 0 |
| 22 | China                            | Female | 15-49 years      | 1.51 | 1.38 | 1.64 | 0 |
| 23 | China                            | Female | 50-69 years      | 1.07 | 1.01 | 1.13 | 0 |
| 24 | China                            | Female | 70+ years        | 0.9  | 0.85 | 0.95 | 0 |
| 25 | China                            | Female | Age-standardized | 1    | 0.94 | 1.05 | 0 |
| 26 | China                            | Both   | All Ages         | 2.22 | 2.17 | 2.27 | 0 |
| 27 | China                            | Both   | 15-49 years      | 1.34 | 1.21 | 1.47 | 0 |
| 28 | China                            | Both   | 50-69 years      | 0.91 | 0.84 | 0.98 | 0 |
| 29 | China                            | Both   | 70+ years        | 0.81 | 0.75 | 0.87 | 0 |
| 30 | China                            | Both   | Age-standardized | 1.35 | 1.26 | 1.43 | 0 |
| 31 | Bolivia                          | Both   | All Ages         | 1.98 | 1.94 | 2.02 | 0 |
| 32 | Brunei                           | Male   | 15-49 years      | 1.23 | 1.16 | 1.3  | 0 |
| 33 | Brunei                           | Male   | 50-69 years      | 1.08 | 1.02 | 1.14 | 0 |
| 34 | Brunei                           | Male   | 70+ years        | 0.86 | 0.82 | 0.9  | 0 |
| 35 | Brunei                           | Male   | Age-standardized | 1.09 | 1.03 | 1.16 | 0 |
| 36 | Brunei                           | Female | All Ages         | 2.6  | 2.51 | 2.69 | 0 |
| 37 | Brunei                           | Female | 15-49 years      | 1.57 | 1.45 | 1.69 | 0 |
| 38 | Brunei                           | Female | 50-69 years      | 1.32 | 1.22 | 1.42 | 0 |
| 39 | Brunei                           | Female | 70+ years        | 1.26 | 1.17 | 1.35 | 0 |
| 40 | Brunei                           | Female | Age-standardized | 1.36 | 1.25 | 1.47 | 0 |
| 41 | Brunei                           | Both   | All Ages         | 2.15 | 2.1  | 2.19 | 0 |
| 42 | Brunei                           | Both   | 15-49 years      | 1.3  | 1.25 | 1.35 | 0 |
| 43 | Brunei                           | Both   | 50-69 years      | 1.11 | 1.04 | 1.18 | 0 |
| 44 | Brunei                           | Both   | 70+ years        | 0.93 | 0.88 | 0.97 | 0 |
| 45 | Brunei                           | Both   | Age-standardized | 1.35 | 1.26 | 1.43 | 0 |
| 46 | Saint Vincent and the Grenadines | Both   | All Ages         | 2.39 | 2.34 | 2.44 | 0 |
| 47 | Morocco                          | Male   | 15-49 years      | 1.68 | 1.66 | 1.7  | 0 |
| 48 | Morocco                          | Male   | 50-69 years      | 1.26 | 1.24 | 1.29 | 0 |
| 49 | Morocco                          | Male   | 70+ years        | 1.12 | 1.1  | 1.14 | 0 |
| 50 | Morocco                          | Male   | Age-standardized | 1.31 | 1.29 | 1.33 | 0 |
| 51 | Morocco                          | Female | All Ages         | 2.38 | 2.34 | 2.43 | 0 |
| 52 | Morocco                          | Female | 15-49 years      | 1.67 | 1.63 | 1.71 | 0 |
| 53 | Morocco                          | Female | 50-69 years      | 1.23 | 1.21 | 1.25 | 0 |
| 54 | Morocco                          | Female | 70+ years        | 1.12 | 1.11 | 1.13 | 0 |
| 55 | Morocco                          | Female | Age-standardized | 1.27 | 1.24 | 1.29 | 0 |
| 56 | Morocco                          | Both   | All Ages         | 2.39 | 2.34 | 2.44 | 0 |
| 57 | Morocco                          | Both   | 15-49 years      | 1.68 | 1.64 | 1.71 | 0 |

|    |             |        |                  |      |      |      |   |
|----|-------------|--------|------------------|------|------|------|---|
| 1  |             |        |                  |      |      |      |   |
| 2  | Morocco     | Both   | 50-69 years      | 1.28 | 1.25 | 1.31 | 0 |
| 3  | Morocco     | Both   | 70+ years        | 1.06 | 1.04 | 1.07 | 0 |
| 4  | El Salvador | Both   | Age-standardized | 1.33 | 1.2  | 1.46 | 0 |
| 5  | Lithuania   | Male   | All Ages         | 1.54 | 1.47 | 1.61 | 0 |
| 6  | Lithuania   | Male   | 15-49 years      | 0.9  | 0.86 | 0.94 | 0 |
| 7  | Lithuania   | Male   | 50-69 years      | 0.36 | 0.33 | 0.4  | 0 |
| 8  | Lithuania   | Male   | 70+ years        | 0.6  | 0.52 | 0.67 | 0 |
| 9  | Lithuania   | Male   | Age-standardized | 0.61 | 0.57 | 0.65 | 0 |
| 10 | Lithuania   | Female | All Ages         | 2.3  | 2.19 | 2.41 | 0 |
| 11 | Lithuania   | Female | 15-49 years      | 1.16 | 1.1  | 1.22 | 0 |
| 12 | Lithuania   | Female | 50-69 years      | 1    | 0.93 | 1.07 | 0 |
| 13 | Lithuania   | Female | 70+ years        | 1.44 | 1.34 | 1.55 | 0 |
| 14 | Lithuania   | Female | Age-standardized | 1.13 | 1.06 | 1.2  | 0 |
| 15 | Lithuania   | Both   | All Ages         | 1.81 | 1.73 | 1.9  | 0 |
| 16 | Lithuania   | Both   | 15-49 years      | 1    | 0.95 | 1.04 | 0 |
| 17 | Lithuania   | Both   | 50-69 years      | 0.66 | 0.62 | 0.7  | 0 |
| 18 | Lithuania   | Both   | 70+ years        | 1.04 | 0.95 | 1.13 | 0 |
| 19 | Lithuania   | Both   | Age-standardized | 1.33 | 1.29 | 1.38 | 0 |
| 20 | Ghana       | Both   | Age-standardized | 1.33 | 1.29 | 1.38 | 0 |
| 21 | Botswana    | Male   | All Ages         | 2.4  | 2.33 | 2.46 | 0 |
| 22 | Botswana    | Male   | 15-49 years      | 1.65 | 1.56 | 1.74 | 0 |
| 23 | Botswana    | Male   | 50-69 years      | 1.12 | 1.08 | 1.16 | 0 |
| 24 | Botswana    | Male   | 70+ years        | 1.04 | 1.01 | 1.08 | 0 |
| 25 | Botswana    | Male   | Age-standardized | 1.21 | 1.18 | 1.25 | 0 |
| 26 | Botswana    | Female | All Ages         | 2.17 | 2.12 | 2.21 | 0 |
| 27 | Botswana    | Female | 15-49 years      | 1.43 | 1.36 | 1.51 | 0 |
| 28 | Botswana    | Female | 50-69 years      | 0.97 | 0.92 | 1.01 | 0 |
| 29 | Botswana    | Female | 70+ years        | 1.09 | 1.04 | 1.14 | 0 |
| 30 | Botswana    | Female | Age-standardized | 1.06 | 1.02 | 1.1  | 0 |
| 31 | Botswana    | Both   | All Ages         | 2.34 | 2.28 | 2.4  | 0 |
| 32 | Botswana    | Both   | 15-49 years      | 1.64 | 1.55 | 1.72 | 0 |
| 33 | Botswana    | Both   | 50-69 years      | 1.02 | 0.97 | 1.06 | 0 |
| 34 | Botswana    | Both   | 70+ years        | 1.04 | 0.96 | 1.13 | 0 |
| 35 | Botswana    | Both   | Age-standardized | 1.32 | 1.25 | 1.39 | 0 |
| 36 | Venezuela   | Both   | Age-standardized | 1.32 | 1.25 | 1.39 | 0 |
| 37 | Gabon       | Male   | All Ages         | 1.75 | 1.69 | 1.8  | 0 |
| 38 | Gabon       | Male   | 15-49 years      | 1.34 | 1.28 | 1.41 | 0 |
| 39 | Gabon       | Male   | 50-69 years      | 1.08 | 1.04 | 1.12 | 0 |
| 40 | Gabon       | Male   | 70+ years        | 1.02 | 0.98 | 1.07 | 0 |
| 41 | Gabon       | Male   | Age-standardized | 1.18 | 1.12 | 1.24 | 0 |
| 42 | Gabon       | Female | All Ages         | 1.66 | 1.59 | 1.73 | 0 |
| 43 | Gabon       | Female | 15-49 years      | 1.43 | 1.37 | 1.5  | 0 |
| 44 | Gabon       | Female | 50-69 years      | 1.08 | 1.03 | 1.13 | 0 |
| 45 | Gabon       | Female | 70+ years        | 1.29 | 1.22 | 1.37 | 0 |
| 46 | Gabon       | Female | Age-standardized | 1.22 | 1.15 | 1.28 | 0 |
| 47 | Gabon       | Both   | All Ages         | 1.69 | 1.64 | 1.75 | 0 |
| 48 | Gabon       | Both   | 15-49 years      | 1.32 | 1.26 | 1.38 | 0 |
| 49 | Gabon       | Both   | 50-69 years      | 1.2  | 1.14 | 1.26 | 0 |
| 50 | Gabon       | Both   | 70+ years        | 1.12 | 1.07 | 1.18 | 0 |
| 51 | Gabon       | Both   | Age-standardized | 1.31 | 1.23 | 1.4  | 0 |
| 52 | Algeria     | Both   | Age-standardized | 1.31 | 1.23 | 1.4  | 0 |
| 53 | Seychelles  | Male   | All Ages         | 2.15 | 2.09 | 2.22 | 0 |
| 54 | Seychelles  | Male   | 15-49 years      | 1.57 | 1.52 | 1.62 | 0 |
| 55 | Seychelles  | Male   | 50-69 years      | 0.96 | 0.92 | 1    | 0 |
| 56 | Seychelles  | Male   | 70+ years        | 0.81 | 0.78 | 0.83 | 0 |
| 57 | Seychelles  | Male   | Age-standardized | 1.05 | 1.01 | 1.09 | 0 |
| 58 | Seychelles  | Female | All Ages         | 2.26 | 2.19 | 2.32 | 0 |
| 59 | Seychelles  | Female | 15-49 years      | 1.9  | 1.82 | 1.99 | 0 |
| 60 | Seychelles  | Female | 50-69 years      | 1.22 | 1.19 | 1.24 | 0 |

|    |              |        |                  |       |       |      |       |
|----|--------------|--------|------------------|-------|-------|------|-------|
| 1  |              |        |                  |       |       |      |       |
| 2  | Seychelles   | Female | 70+ years        | 1.11  | 1.07  | 1.15 | 0     |
| 3  | Seychelles   | Female | Age-standardized | 1.25  | 1.22  | 1.28 | 0     |
| 4  | Seychelles   | Both   | All Ages         | 2.22  | 2.16  | 2.27 | 0     |
| 5  | Seychelles   | Both   | 15-49 years      | 1.74  | 1.68  | 1.8  | 0     |
| 6  | Seychelles   | Both   | 50-69 years      | 1.11  | 1.08  | 1.14 | 0     |
| 7  | Seychelles   | Both   | 70+ years        | 0.99  | 0.95  | 1.02 | 0     |
| 8  | Honduras     | Both   | Age-standardized | 1.3   | 1.21  | 1.38 | 0     |
| 9  | Montenegro   | Male   | All Ages         | 1.12  | 1.08  | 1.15 | 0     |
| 10 | Montenegro   | Male   | 15-49 years      | 0.57  | 0.49  | 0.65 | 0     |
| 11 | Montenegro   | Male   | 50-69 years      | -0.05 | -0.15 | 0.04 | 0.239 |
| 12 | Montenegro   | Male   | 70+ years        | 0.29  | 0.25  | 0.32 | 0     |
| 13 | Montenegro   | Male   | Age-standardized | 0.25  | 0.16  | 0.33 | 0     |
| 14 | Montenegro   | Female | All Ages         | 1.62  | 1.54  | 1.7  | 0     |
| 15 | Montenegro   | Female | 15-49 years      | 0.79  | 0.71  | 0.88 | 0     |
| 16 | Montenegro   | Female | 50-69 years      | 0.62  | 0.55  | 0.7  | 0     |
| 17 | Montenegro   | Female | 70+ years        | 0.88  | 0.75  | 1    | 0     |
| 18 | Montenegro   | Female | Age-standardized | 0.66  | 0.55  | 0.76 | 0     |
| 19 | Montenegro   | Both   | All Ages         | 1.32  | 1.26  | 1.37 | 0     |
| 20 | Montenegro   | Both   | 15-49 years      | 0.63  | 0.55  | 0.72 | 0     |
| 21 | Montenegro   | Both   | 50-69 years      | 0.26  | 0.18  | 0.34 | 0     |
| 22 | Montenegro   | Both   | 70+ years        | 0.64  | 0.56  | 0.71 | 0     |
| 23 | Turkmenistan | Both   | Age-standardized | 1.3   | 1.23  | 1.37 | 0     |
| 24 | Albania      | Male   | All Ages         | 2.39  | 2.32  | 2.45 | 0     |
| 25 | Albania      | Male   | 15-49 years      | 0.78  | 0.75  | 0.81 | 0     |
| 26 | Albania      | Male   | 50-69 years      | 0.47  | 0.4   | 0.54 | 0     |
| 27 | Albania      | Male   | 70+ years        | 0.64  | 0.59  | 0.69 | 0     |
| 28 | Albania      | Male   | Age-standardized | 0.6   | 0.58  | 0.62 | 0     |
| 29 | Albania      | Female | All Ages         | 2.86  | 2.75  | 2.98 | 0     |
| 30 | Albania      | Female | 15-49 years      | 1.21  | 1.15  | 1.27 | 0     |
| 31 | Albania      | Female | 50-69 years      | 1     | 0.97  | 1.03 | 0     |
| 32 | Albania      | Female | 70+ years        | 1.34  | 1.29  | 1.4  | 0     |
| 33 | Albania      | Female | Age-standardized | 1.01  | 0.95  | 1.06 | 0     |
| 34 | Albania      | Both   | All Ages         | 2.59  | 2.5   | 2.67 | 0     |
| 35 | Albania      | Both   | 15-49 years      | 0.96  | 0.92  | 0.99 | 0     |
| 36 | Albania      | Both   | 50-69 years      | 0.67  | 0.64  | 0.71 | 0     |
| 37 | Albania      | Both   | 70+ years        | 1.09  | 1.03  | 1.15 | 0     |
| 38 | Morocco      | Both   | Age-standardized | 1.29  | 1.27  | 1.32 | 0     |
| 39 | Austria      | Male   | All Ages         | 1.41  | 1.3   | 1.52 | 0     |
| 40 | Austria      | Male   | 15-49 years      | 1.12  | 0.97  | 1.28 | 0     |
| 41 | Austria      | Male   | 50-69 years      | 0.92  | 0.81  | 1.04 | 0     |
| 42 | Austria      | Male   | 70+ years        | 0.66  | 0.57  | 0.76 | 0     |
| 43 | Austria      | Male   | Age-standardized | 0.94  | 0.83  | 1.05 | 0     |
| 44 | Austria      | Female | All Ages         | 1.4   | 1.29  | 1.52 | 0     |
| 45 | Austria      | Female | 15-49 years      | 1.29  | 1.12  | 1.45 | 0     |
| 46 | Austria      | Female | 50-69 years      | 1.07  | 0.96  | 1.19 | 0     |
| 47 | Austria      | Female | 70+ years        | 0.84  | 0.73  | 0.95 | 0     |
| 48 | Austria      | Female | Age-standardized | 1.09  | 0.97  | 1.22 | 0     |
| 49 | Austria      | Both   | All Ages         | 1.43  | 1.32  | 1.54 | 0     |
| 50 | Austria      | Both   | 15-49 years      | 1.16  | 1     | 1.31 | 0     |
| 51 | Austria      | Both   | 50-69 years      | 1.04  | 0.91  | 1.17 | 0     |
| 52 | Austria      | Both   | 70+ years        | 0.98  | 0.88  | 1.07 | 0     |
| 53 | Grenada      | Both   | Age-standardized | 1.29  | 1.22  | 1.37 | 0     |
| 54 | Maldives     | Male   | All Ages         | 3.42  | 3.27  | 3.57 | 0     |
| 55 | Maldives     | Male   | 15-49 years      | 2     | 1.88  | 2.11 | 0     |
| 56 | Maldives     | Male   | 50-69 years      | 1.35  | 1.29  | 1.4  | 0     |
| 57 | Maldives     | Male   | 70+ years        | 1.06  | 1.02  | 1.11 | 0     |

|    |           |        |                  |      |       |      |       |
|----|-----------|--------|------------------|------|-------|------|-------|
| 1  |           |        |                  |      |       |      |       |
| 2  | Maldives  | Male   | Age-standardized | 1.41 | 1.36  | 1.46 | 0     |
| 3  | Maldives  | Female | All Ages         | 3.71 | 3.58  | 3.83 | 0     |
| 4  | Maldives  | Female | 15-49 years      | 2.22 | 2.07  | 2.37 | 0     |
| 5  | Maldives  | Female | 50-69 years      | 1.61 | 1.57  | 1.64 | 0     |
| 6  | Maldives  | Female | 70+ years        | 1.37 | 1.33  | 1.41 | 0     |
| 7  | Maldives  | Female | Age-standardized | 1.59 | 1.53  | 1.65 | 0     |
| 8  | Maldives  | Both   | All Ages         | 3.61 | 3.46  | 3.77 | 0     |
| 9  | Maldives  | Both   | 15-49 years      | 2.21 | 2.05  | 2.38 | 0     |
| 10 | Maldives  | Both   | 50-69 years      | 1.42 | 1.38  | 1.45 | 0     |
| 11 | Maldives  | Both   | 70+ years        | 1.07 | 1.04  | 1.1  | 0     |
| 12 | Peru      | Both   | Age-standardized | 1.28 | 1.24  | 1.32 | 0     |
| 13 | Belarus   | Male   | All Ages         | 1.1  | 1.04  | 1.15 | 0     |
| 14 | Belarus   | Male   | 15-49 years      | 0.74 | 0.59  | 0.89 | 0     |
| 15 | Belarus   | Male   | 50-69 years      | 0.08 | -0.05 | 0.21 | 0.235 |
| 16 | Belarus   | Male   | 70+ years        | 0.32 | 0.3   | 0.35 | 0     |
| 17 | Belarus   | Male   | Age-standardized | 0.42 | 0.31  | 0.52 | 0     |
| 18 | Belarus   | Female | All Ages         | 1.5  | 1.42  | 1.58 | 0     |
| 19 | Belarus   | Female | 15-49 years      | 0.99 | 0.87  | 1.12 | 0     |
| 20 | Belarus   | Female | 50-69 years      | 0.46 | 0.33  | 0.59 | 0     |
| 21 | Belarus   | Female | 70+ years        | 1.06 | 0.95  | 1.17 | 0     |
| 22 | Belarus   | Female | Age-standardized | 0.83 | 0.72  | 0.94 | 0     |
| 23 | Belarus   | Both   | All Ages         | 1.25 | 1.19  | 1.31 | 0     |
| 24 | Belarus   | Both   | 15-49 years      | 0.82 | 0.68  | 0.96 | 0     |
| 25 | Belarus   | Both   | 50-69 years      | 0.28 | 0.15  | 0.41 | 0     |
| 26 | Belarus   | Both   | 70+ years        | 0.8  | 0.75  | 0.84 | 0     |
| 27 | Djibouti  | Both   | Age-standardized | 1.28 | 1.23  | 1.33 | 0     |
| 28 | Palestine | Male   | All Ages         | 1.84 | 1.8   | 1.88 | 0     |
| 29 | Palestine | Male   | 15-49 years      | 1.18 | 1.06  | 1.3  | 0     |
| 30 | Palestine | Male   | 50-69 years      | 0.82 | 0.74  | 0.9  | 0     |
| 31 | Palestine | Male   | 70+ years        | 0.72 | 0.6   | 0.84 | 0     |
| 32 | Palestine | Male   | Age-standardized | 0.87 | 0.77  | 0.97 | 0     |
| 33 | Palestine | Female | All Ages         | 1.61 | 1.55  | 1.68 | 0     |
| 34 | Palestine | Female | 15-49 years      | 1.13 | 1.04  | 1.23 | 0     |
| 35 | Palestine | Female | 50-69 years      | 0.87 | 0.76  | 0.98 | 0     |
| 36 | Palestine | Female | 70+ years        | 0.82 | 0.68  | 0.96 | 0     |
| 37 | Palestine | Female | Age-standardized | 0.9  | 0.78  | 1.01 | 0     |
| 38 | Palestine | Both   | All Ages         | 1.76 | 1.72  | 1.8  | 0     |
| 39 | Palestine | Both   | 15-49 years      | 1.16 | 1.05  | 1.28 | 0     |
| 40 | Palestine | Both   | 50-69 years      | 0.99 | 0.89  | 1.08 | 0     |
| 41 | Palestine | Both   | 70+ years        | 0.68 | 0.58  | 0.79 | 0     |
| 42 | Bahrain   | Both   | Age-standardized | 1.27 | 1.23  | 1.31 | 0     |
| 43 | Australia | Male   | All Ages         | 1.54 | 1.4   | 1.69 | 0     |
| 44 | Australia | Male   | 15-49 years      | 1.26 | 1.11  | 1.42 | 0     |
| 45 | Australia | Male   | 50-69 years      | 1.08 | 0.97  | 1.19 | 0     |
| 46 | Australia | Male   | 70+ years        | 0.73 | 0.63  | 0.82 | 0     |
| 47 | Australia | Male   | Age-standardized | 1.14 | 1.01  | 1.27 | 0     |
| 48 | Australia | Female | All Ages         | 1.63 | 1.5   | 1.76 | 0     |
| 49 | Australia | Female | 15-49 years      | 1.38 | 1.27  | 1.49 | 0     |
| 50 | Australia | Female | 50-69 years      | 1.03 | 0.93  | 1.13 | 0     |
| 51 | Australia | Female | 70+ years        | 0.85 | 0.72  | 0.97 | 0     |
| 52 | Australia | Female | Age-standardized | 1.17 | 1.06  | 1.27 | 0     |
| 53 | Australia | Both   | All Ages         | 1.57 | 1.43  | 1.71 | 0     |
| 54 | Australia | Both   | 15-49 years      | 1.28 | 1.15  | 1.42 | 0     |
| 55 | Australia | Both   | 50-69 years      | 1.04 | 0.93  | 1.15 | 0     |
| 56 | Australia | Both   | 70+ years        | 0.87 | 0.76  | 0.99 | 0     |
| 57 | Guatemala | Both   | Age-standardized | 1.27 | 1.23  | 1.31 | 0     |

|    |                          |        |                  |      |      |      |       |
|----|--------------------------|--------|------------------|------|------|------|-------|
| 1  |                          |        |                  |      |      |      |       |
| 2  | Moldova                  | Male   | All Ages         | 1.51 | 1.41 | 1.61 | 0     |
| 3  | Moldova                  | Male   | 15-49 years      | 0.84 | 0.66 | 1.03 | 0     |
| 4  | Moldova                  | Male   | 50-69 years      | 0.19 | 0.06 | 0.32 | 0.006 |
| 5  | Moldova                  | Male   | 70+ years        | 0.33 | 0.25 | 0.41 | 0     |
| 6  | Moldova                  | Male   | Age-standardized | 0.52 | 0.38 | 0.65 | 0     |
| 7  | Moldova                  | Female | All Ages         | 2.03 | 1.9  | 2.15 | 0     |
| 8  | Moldova                  | Female | 15-49 years      | 1.06 | 0.91 | 1.21 | 0     |
| 9  | Moldova                  | Female | 50-69 years      | 0.72 | 0.59 | 0.86 | 0     |
| 10 | Moldova                  | Female | 70+ years        | 1.12 | 0.98 | 1.27 | 0     |
| 11 | Moldova                  | Female | Age-standardized | 1    | 0.86 | 1.13 | 0     |
| 12 | Moldova                  | Both   | All Ages         | 1.71 | 1.6  | 1.83 | 0     |
| 13 | Moldova                  | Both   | 15-49 years      | 0.96 | 0.79 | 1.14 | 0     |
| 14 | Moldova                  | Both   | 50-69 years      | 0.44 | 0.31 | 0.57 | 0     |
| 15 | Moldova                  | Both   | 70+ years        | 0.74 | 0.63 | 0.85 | 0     |
| 16 | Moldova                  | Both   | Age-standardized | 1.27 | 1.21 | 1.33 | 0     |
| 17 | Mauritius                | Both   | All Ages         | 2.15 | 2.12 | 2.19 | 0     |
| 18 | Costa Rica               | Male   | 15-49 years      | 1.19 | 1.14 | 1.24 | 0     |
| 19 | Costa Rica               | Male   | 50-69 years      | 0.83 | 0.77 | 0.88 | 0     |
| 20 | Costa Rica               | Male   | 70+ years        | 0.58 | 0.53 | 0.63 | 0     |
| 21 | Costa Rica               | Male   | Age-standardized | 0.91 | 0.86 | 0.96 | 0     |
| 22 | Costa Rica               | Female | All Ages         | 2.28 | 2.24 | 2.32 | 0     |
| 23 | Costa Rica               | Female | 15-49 years      | 1.17 | 1.14 | 1.21 | 0     |
| 24 | Costa Rica               | Female | 50-69 years      | 0.85 | 0.83 | 0.87 | 0     |
| 25 | Costa Rica               | Female | 70+ years        | 0.75 | 0.71 | 0.8  | 0     |
| 26 | Costa Rica               | Female | Age-standardized | 0.92 | 0.89 | 0.96 | 0     |
| 27 | Costa Rica               | Both   | All Ages         | 2.17 | 2.13 | 2.2  | 0     |
| 28 | Costa Rica               | Both   | 15-49 years      | 1.15 | 1.1  | 1.2  | 0     |
| 29 | Costa Rica               | Both   | 50-69 years      | 0.79 | 0.75 | 0.84 | 0     |
| 30 | Costa Rica               | Both   | 70+ years        | 0.62 | 0.58 | 0.67 | 0     |
| 31 | Costa Rica               | Both   | Age-standardized | 1.26 | 1.14 | 1.37 | 0     |
| 32 | France                   | Both   | All Ages         | 1.64 | 1.61 | 1.67 | 0     |
| 33 | Low-middle SDI           | Male   | 15-49 years      | 1.25 | 1.24 | 1.25 | 0     |
| 34 | Low-middle SDI           | Male   | 50-69 years      | 1.08 | 1.07 | 1.1  | 0     |
| 35 | Low-middle SDI           | Male   | 70+ years        | 0.8  | 0.76 | 0.83 | 0     |
| 36 | Low-middle SDI           | Male   | Age-standardized | 1.07 | 1.06 | 1.08 | 0     |
| 37 | Low-middle SDI           | Female | All Ages         | 1.64 | 1.61 | 1.67 | 0     |
| 38 | Low-middle SDI           | Female | 15-49 years      | 1.15 | 1.14 | 1.17 | 0     |
| 39 | Low-middle SDI           | Female | 50-69 years      | 0.97 | 0.96 | 0.99 | 0     |
| 40 | Low-middle SDI           | Female | 70+ years        | 0.89 | 0.87 | 0.92 | 0     |
| 41 | Low-middle SDI           | Female | Age-standardized | 0.97 | 0.95 | 0.98 | 0     |
| 42 | Low-middle SDI           | Both   | All Ages         | 1.63 | 1.6  | 1.66 | 0     |
| 43 | Low-middle SDI           | Both   | 15-49 years      | 1.2  | 1.19 | 1.21 | 0     |
| 44 | Low-middle SDI           | Both   | 50-69 years      | 1.01 | 0.99 | 1.02 | 0     |
| 45 | Low-middle SDI           | Both   | 70+ years        | 0.8  | 0.78 | 0.82 | 0     |
| 46 | Low-middle SDI           | Both   | Age-standardized | 1.01 | 1    | 1.02 | 0     |
| 47 | Northern Mariana Islands | Male   | All Ages         | 1.44 | 1.35 | 1.54 | 0     |
| 48 | Northern Mariana Islands | Male   | 15-49 years      | 0.64 | 0.46 | 0.82 | 0     |
| 49 | Northern Mariana Islands | Male   | 50-69 years      | 0.49 | 0.43 | 0.56 | 0     |
| 50 | Northern Mariana Islands | Male   | 70+ years        | 0.31 | 0.27 | 0.36 | 0     |
| 51 | Northern Mariana Islands | Male   | Age-standardized | 0.5  | 0.43 | 0.56 | 0     |
| 52 | Northern Mariana Islands | Female | All Ages         | 2.01 | 1.94 | 2.07 | 0     |
| 53 | Northern Mariana Islands | Female | 15-49 years      | 1.04 | 0.81 | 1.28 | 0     |
| 54 | Northern Mariana Islands | Female | 50-69 years      | 0.67 | 0.63 | 0.71 | 0     |
| 55 | Northern Mariana Islands | Female | 70+ years        | 0.44 | 0.39 | 0.49 | 0     |
| 56 | Northern Mariana Islands | Female | Age-standardized | 0.65 | 0.6  | 0.7  | 0     |
| 57 | Northern Mariana Islands | Both   | All Ages         | 1.69 | 1.6  | 1.77 | 0     |



|    |                          |        |                  |      |      |      |   |
|----|--------------------------|--------|------------------|------|------|------|---|
| 1  |                          |        |                  |      |      |      |   |
| 2  | Northern Mariana Islands | Both   | 15-49 years      | 0.83 | 0.65 | 1.01 | 0 |
| 3  | Northern Mariana Islands | Both   | 50-69 years      | 0.5  | 0.45 | 0.54 | 0 |
| 4  | Northern Mariana Islands | Both   | 70+ years        | 0.35 | 0.29 | 0.4  | 0 |
| 5  | Bosnia and Herzegovina   | Both   | Age-standardized | 1.24 | 1.12 | 1.37 | 0 |
| 6  | Poland                   | Male   | All Ages         | 1.68 | 1.65 | 1.71 | 0 |
| 7  | Poland                   | Male   | 15-49 years      | 0.99 | 0.88 | 1.1  | 0 |
| 8  | Poland                   | Male   | 50-69 years      | 0.39 | 0.3  | 0.48 | 0 |
| 9  | Poland                   | Male   | 70+ years        | 0.69 | 0.61 | 0.77 | 0 |
| 10 | Poland                   | Male   | Age-standardized | 0.73 | 0.7  | 0.76 | 0 |
| 11 | Poland                   | Female | All Ages         | 2.04 | 2.01 | 2.08 | 0 |
| 12 | Poland                   | Female | 15-49 years      | 1.11 | 1.02 | 1.2  | 0 |
| 13 | Poland                   | Female | 50-69 years      | 0.88 | 0.72 | 1.04 | 0 |
| 14 | Poland                   | Female | 70+ years        | 1.14 | 1.1  | 1.17 | 0 |
| 15 | Poland                   | Female | Age-standardized | 1.07 | 1.02 | 1.11 | 0 |
| 16 | Poland                   | Both   | All Ages         | 1.82 | 1.79 | 1.85 | 0 |
| 17 | Poland                   | Both   | 15-49 years      | 1.04 | 0.94 | 1.14 | 0 |
| 18 | Poland                   | Both   | 50-69 years      | 0.63 | 0.52 | 0.74 | 0 |
| 19 | Poland                   | Both   | 70+ years        | 0.96 | 0.91 | 1    | 0 |
| 20 | Poland                   | Both   | Age-standardized | 1.24 | 1.18 | 1.29 | 0 |
| 21 | Suriname                 | Both   | Age-standardized | 1.24 | 1.18 | 1.29 | 0 |
| 22 | Romania                  | Male   | All Ages         | 1.44 | 1.39 | 1.48 | 0 |
| 23 | Romania                  | Male   | 15-49 years      | 1.11 | 1.05 | 1.17 | 0 |
| 24 | Romania                  | Male   | 50-69 years      | 0.3  | 0.21 | 0.39 | 0 |
| 25 | Romania                  | Male   | 70+ years        | 0.63 | 0.54 | 0.72 | 0 |
| 26 | Romania                  | Male   | Age-standardized | 0.59 | 0.57 | 0.61 | 0 |
| 27 | Romania                  | Female | All Ages         | 2.23 | 2.17 | 2.29 | 0 |
| 28 | Romania                  | Female | 15-49 years      | 1.48 | 1.46 | 1.5  | 0 |
| 29 | Romania                  | Female | 50-69 years      | 1.22 | 1.13 | 1.3  | 0 |
| 30 | Romania                  | Female | 70+ years        | 1.29 | 1.22 | 1.36 | 0 |
| 31 | Romania                  | Female | Age-standardized | 1.19 | 1.15 | 1.23 | 0 |
| 32 | Romania                  | Both   | All Ages         | 1.76 | 1.71 | 1.81 | 0 |
| 33 | Romania                  | Both   | 15-49 years      | 1.26 | 1.22 | 1.3  | 0 |
| 34 | Romania                  | Both   | 50-69 years      | 0.69 | 0.61 | 0.77 | 0 |
| 35 | Romania                  | Both   | 70+ years        | 0.95 | 0.87 | 1.03 | 0 |
| 36 | Romania                  | Both   | Age-standardized | 1.24 | 1.2  | 1.29 | 0 |
| 37 | United Arab Emirates     | Both   | Age-standardized | 1.24 | 1.2  | 1.29 | 0 |
| 38 | Bahrain                  | Male   | All Ages         | 2.41 | 2.31 | 2.52 | 0 |
| 39 | Bahrain                  | Male   | 15-49 years      | 1.6  | 1.52 | 1.68 | 0 |
| 40 | Bahrain                  | Male   | 50-69 years      | 1.04 | 1.02 | 1.06 | 0 |
| 41 | Bahrain                  | Male   | 70+ years        | 0.87 | 0.84 | 0.91 | 0 |
| 42 | Bahrain                  | Male   | Age-standardized | 1.14 | 1.12 | 1.16 | 0 |
| 43 | Bahrain                  | Female | All Ages         | 2.68 | 2.6  | 2.77 | 0 |
| 44 | Bahrain                  | Female | 15-49 years      | 1.84 | 1.8  | 1.89 | 0 |
| 45 | Bahrain                  | Female | 50-69 years      | 1.31 | 1.26 | 1.35 | 0 |
| 46 | Bahrain                  | Female | 70+ years        | 1.17 | 1.1  | 1.23 | 0 |
| 47 | Bahrain                  | Female | Age-standardized | 1.35 | 1.3  | 1.41 | 0 |
| 48 | Bahrain                  | Both   | All Ages         | 2.62 | 2.5  | 2.74 | 0 |
| 49 | Bahrain                  | Both   | 15-49 years      | 1.77 | 1.69 | 1.86 | 0 |
| 50 | Bahrain                  | Both   | 50-69 years      | 1.28 | 1.24 | 1.32 | 0 |
| 51 | Bahrain                  | Both   | 70+ years        | 0.9  | 0.87 | 0.93 | 0 |
| 52 | Bahrain                  | Both   | Age-standardized | 1.23 | 1.15 | 1.31 | 0 |
| 53 | Saudi Arabia             | Both   | Age-standardized | 1.23 | 1.15 | 1.31 | 0 |
| 54 | Panama                   | Male   | All Ages         | 1.93 | 1.87 | 1.99 | 0 |
| 55 | Panama                   | Male   | 15-49 years      | 1.45 | 1.38 | 1.52 | 0 |
| 56 | Panama                   | Male   | 50-69 years      | 1.12 | 1.07 | 1.17 | 0 |
| 57 | Panama                   | Male   | 70+ years        | 0.92 | 0.87 | 0.96 | 0 |
| 58 | Panama                   | Male   | Age-standardized | 1.15 | 1.1  | 1.19 | 0 |
| 59 | Panama                   | Female | All Ages         | 2.22 | 2.14 | 2.3  | 0 |
| 60 | Panama                   | Female | 15-49 years      | 1.65 | 1.56 | 1.75 | 0 |



|    |                            |        |                  |      |      |      |   |
|----|----------------------------|--------|------------------|------|------|------|---|
| 1  |                            |        |                  |      |      |      |   |
| 2  | Panama                     | Female | 50-69 years      | 1.33 | 1.27 | 1.39 | 0 |
| 3  | Panama                     | Female | 70+ years        | 1.15 | 1.1  | 1.21 | 0 |
| 4  | Panama                     | Female | Age-standardized | 1.33 | 1.27 | 1.4  | 0 |
| 5  | Panama                     | Both   | All Ages         | 2.05 | 1.98 | 2.12 | 0 |
| 6  | Panama                     | Both   | 15-49 years      | 1.54 | 1.46 | 1.61 | 0 |
| 7  | Panama                     | Both   | 50-69 years      | 1.2  | 1.15 | 1.25 | 0 |
| 8  | Panama                     | Both   | 70+ years        | 1    | 0.96 | 1.05 | 0 |
| 9  | Taiwan (Province of China) | Both   | Age-standardized | 1.22 | 1.16 | 1.28 | 0 |
| 10 | Indonesia                  | Male   | All Ages         | 2.34 | 2.26 | 2.42 | 0 |
| 11 | Indonesia                  | Male   | 15-49 years      | 1.8  | 1.7  | 1.9  | 0 |
| 12 | Indonesia                  | Male   | 50-69 years      | 1.33 | 1.24 | 1.42 | 0 |
| 13 | Indonesia                  | Male   | 70+ years        | 1.12 | 1.06 | 1.19 | 0 |
| 14 | Indonesia                  | Male   | Age-standardized | 1.34 | 1.26 | 1.42 | 0 |
| 15 | Indonesia                  | Female | All Ages         | 1.97 | 1.91 | 2.03 | 0 |
| 16 | Indonesia                  | Female | 15-49 years      | 1.45 | 1.39 | 1.51 | 0 |
| 17 | Indonesia                  | Female | 50-69 years      | 1.01 | 0.97 | 1.05 | 0 |
| 18 | Indonesia                  | Female | 70+ years        | 0.82 | 0.78 | 0.87 | 0 |
| 19 | Indonesia                  | Female | Age-standardized | 0.97 | 0.93 | 1.02 | 0 |
| 20 | Indonesia                  | Both   | All Ages         | 2.22 | 2.17 | 2.28 | 0 |
| 21 | Indonesia                  | Both   | 15-49 years      | 1.71 | 1.64 | 1.79 | 0 |
| 22 | Indonesia                  | Both   | 50-69 years      | 1.25 | 1.19 | 1.31 | 0 |
| 23 | Indonesia                  | Both   | 70+ years        | 0.91 | 0.87 | 0.94 | 0 |
| 24 | Indonesia                  | Both   | Age-standardized | 1.22 | 1.17 | 1.27 | 0 |
| 25 | Panama                     | Both   | Age-standardized | 1.22 | 1.17 | 1.27 | 0 |
| 26 | Solomon Islands            | Male   | All Ages         | 1.48 | 1.38 | 1.57 | 0 |
| 27 | Solomon Islands            | Male   | 15-49 years      | 1.3  | 1.21 | 1.4  | 0 |
| 28 | Solomon Islands            | Male   | 50-69 years      | 0.87 | 0.78 | 0.97 | 0 |
| 29 | Solomon Islands            | Male   | 70+ years        | 0.74 | 0.67 | 0.82 | 0 |
| 30 | Solomon Islands            | Male   | Age-standardized | 0.93 | 0.85 | 1.02 | 0 |
| 31 | Solomon Islands            | Female | All Ages         | 1.89 | 1.82 | 1.96 | 0 |
| 32 | Solomon Islands            | Female | 15-49 years      | 1.53 | 1.46 | 1.6  | 0 |
| 33 | Solomon Islands            | Female | 50-69 years      | 1.15 | 1.09 | 1.21 | 0 |
| 34 | Solomon Islands            | Female | 70+ years        | 0.97 | 0.91 | 1.04 | 0 |
| 35 | Solomon Islands            | Female | Age-standardized | 1.12 | 1.06 | 1.18 | 0 |
| 36 | Solomon Islands            | Both   | All Ages         | 1.65 | 1.57 | 1.74 | 0 |
| 37 | Solomon Islands            | Both   | 15-49 years      | 1.4  | 1.32 | 1.48 | 0 |
| 38 | Solomon Islands            | Both   | 50-69 years      | 0.98 | 0.91 | 1.05 | 0 |
| 39 | Solomon Islands            | Both   | 70+ years        | 0.79 | 0.72 | 0.86 | 0 |
| 40 | Solomon Islands            | Both   | Age-standardized | 1.22 | 1.17 | 1.28 | 0 |
| 41 | Indonesia                  | Both   | Age-standardized | 1.22 | 1.17 | 1.28 | 0 |
| 42 | Paraguay                   | Male   | All Ages         | 1.89 | 1.85 | 1.94 | 0 |
| 43 | Paraguay                   | Male   | 15-49 years      | 1.15 | 1.12 | 1.18 | 0 |
| 44 | Paraguay                   | Male   | 50-69 years      | 0.97 | 0.92 | 1.02 | 0 |
| 45 | Paraguay                   | Male   | 70+ years        | 0.76 | 0.71 | 0.82 | 0 |
| 46 | Paraguay                   | Male   | Age-standardized | 1.02 | 0.96 | 1.07 | 0 |
| 47 | Paraguay                   | Female | All Ages         | 1.95 | 1.9  | 1.99 | 0 |
| 48 | Paraguay                   | Female | 15-49 years      | 1.16 | 1.12 | 1.21 | 0 |
| 49 | Paraguay                   | Female | 50-69 years      | 0.98 | 0.93 | 1.03 | 0 |
| 50 | Paraguay                   | Female | 70+ years        | 0.88 | 0.81 | 0.94 | 0 |
| 51 | Paraguay                   | Female | Age-standardized | 1.02 | 0.96 | 1.07 | 0 |
| 52 | Paraguay                   | Both   | All Ages         | 1.92 | 1.87 | 1.97 | 0 |
| 53 | Paraguay                   | Both   | 15-49 years      | 1.17 | 1.13 | 1.2  | 0 |
| 54 | Paraguay                   | Both   | 50-69 years      | 0.98 | 0.93 | 1.03 | 0 |
| 55 | Paraguay                   | Both   | 70+ years        | 0.82 | 0.76 | 0.88 | 0 |
| 56 | Paraguay                   | Both   | Age-standardized | 1.02 | 0.96 | 1.07 | 0 |
| 57 | Cape Verde                 | Both   | Age-standardized | 1.22 | 1.18 | 1.26 | 0 |
| 58 | El Salvador                | Male   | All Ages         | 2.37 | 2.29 | 2.45 | 0 |
| 59 | El Salvador                | Male   | 15-49 years      | 1.6  | 1.44 | 1.75 | 0 |
| 60 | El Salvador                | Male   | 50-69 years      | 1.28 | 1.15 | 1.41 | 0 |

|    |               |        |                  |      |      |      |   |
|----|---------------|--------|------------------|------|------|------|---|
| 1  |               |        |                  |      |      |      |   |
| 2  | El Salvador   | Male   | 70+ years        | 1.08 | 0.96 | 1.2  | 0 |
| 3  | El Salvador   | Male   | Age-standardized | 1.35 | 1.22 | 1.48 | 0 |
| 4  | El Salvador   | Female | All Ages         | 2.61 | 2.5  | 2.72 | 0 |
| 5  | El Salvador   | Female | 15-49 years      | 1.73 | 1.56 | 1.89 | 0 |
| 6  | El Salvador   | Female | 50-69 years      | 1.35 | 1.23 | 1.48 | 0 |
| 7  | El Salvador   | Female | 70+ years        | 1.23 | 1.1  | 1.35 | 0 |
| 8  | El Salvador   | Female | Age-standardized | 1.38 | 1.25 | 1.51 | 0 |
| 9  | El Salvador   | Both   | All Ages         | 2.46 | 2.37 | 2.55 | 0 |
| 10 | El Salvador   | Both   | 15-49 years      | 1.63 | 1.48 | 1.79 | 0 |
| 11 | El Salvador   | Both   | 50-69 years      | 1.26 | 1.14 | 1.39 | 0 |
| 12 | El Salvador   | Both   | 70+ years        | 1.11 | 0.98 | 1.23 | 0 |
| 13 | United States | Both   | Age-standardized | 1.22 | 1.1  | 1.34 | 0 |
| 14 | Ireland       | Male   | All Ages         | 1.64 | 1.47 | 1.81 | 0 |
| 15 | Ireland       | Male   | 15-49 years      | 1.45 | 1.33 | 1.58 | 0 |
| 16 | Ireland       | Male   | 50-69 years      | 1.03 | 0.92 | 1.13 | 0 |
| 17 | Ireland       | Male   | 70+ years        | 0.77 | 0.67 | 0.86 | 0 |
| 18 | Ireland       | Male   | Age-standardized | 1.06 | 0.94 | 1.18 | 0 |
| 19 | Ireland       | Female | All Ages         | 1.75 | 1.59 | 1.9  | 0 |
| 20 | Ireland       | Female | 15-49 years      | 1.62 | 1.49 | 1.74 | 0 |
| 21 | Ireland       | Female | 50-69 years      | 1.25 | 1.13 | 1.37 | 0 |
| 22 | Ireland       | Female | 70+ years        | 1.14 | 1.02 | 1.26 | 0 |
| 23 | Ireland       | Female | Age-standardized | 1.27 | 1.14 | 1.4  | 0 |
| 24 | Ireland       | Both   | All Ages         | 1.67 | 1.51 | 1.84 | 0 |
| 25 | Ireland       | Both   | 15-49 years      | 1.48 | 1.35 | 1.62 | 0 |
| 26 | Ireland       | Both   | 50-69 years      | 1.11 | 1    | 1.23 | 0 |
| 27 | Ireland       | Both   | 70+ years        | 1.01 | 0.92 | 1.1  | 0 |
| 28 | Malaysia      | Both   | Age-standardized | 1.21 | 1.18 | 1.24 | 0 |
| 29 | Mali          | Male   | All Ages         | 1    | 0.99 | 1.01 | 0 |
| 30 | Mali          | Male   | 15-49 years      | 1.09 | 1.04 | 1.13 | 0 |
| 31 | Mali          | Male   | 50-69 years      | 1.13 | 1.1  | 1.16 | 0 |
| 32 | Mali          | Male   | 70+ years        | 1.15 | 1.12 | 1.19 | 0 |
| 33 | Mali          | Male   | Age-standardized | 1.18 | 1.15 | 1.2  | 0 |
| 34 | Mali          | Female | All Ages         | 0.55 | 0.52 | 0.59 | 0 |
| 35 | Mali          | Female | 15-49 years      | 0.67 | 0.66 | 0.68 | 0 |
| 36 | Mali          | Female | 50-69 years      | 0.76 | 0.74 | 0.78 | 0 |
| 37 | Mali          | Female | 70+ years        | 0.94 | 0.93 | 0.96 | 0 |
| 38 | Mali          | Female | Age-standardized | 0.84 | 0.82 | 0.86 | 0 |
| 39 | Mali          | Both   | All Ages         | 0.84 | 0.82 | 0.85 | 0 |
| 40 | Mali          | Both   | 15-49 years      | 0.94 | 0.91 | 0.96 | 0 |
| 41 | Mali          | Both   | 50-69 years      | 1.03 | 1.01 | 1.04 | 0 |
| 42 | Mali          | Both   | 70+ years        | 1.1  | 1.08 | 1.13 | 0 |
| 43 | Uruguay       | Both   | Age-standardized | 1.21 | 1.17 | 1.26 | 0 |
| 44 | Grenada       | Male   | All Ages         | 2.88 | 2.76 | 3    | 0 |
| 45 | Grenada       | Male   | 15-49 years      | 1.7  | 1.6  | 1.81 | 0 |
| 46 | Grenada       | Male   | 50-69 years      | 1.16 | 1.1  | 1.23 | 0 |
| 47 | Grenada       | Male   | 70+ years        | 1.05 | 0.96 | 1.14 | 0 |
| 48 | Grenada       | Male   | Age-standardized | 1.24 | 1.16 | 1.31 | 0 |
| 49 | Grenada       | Female | All Ages         | 2.59 | 2.48 | 2.7  | 0 |
| 50 | Grenada       | Female | 15-49 years      | 1.61 | 1.54 | 1.67 | 0 |
| 51 | Grenada       | Female | 50-69 years      | 1.1  | 1.03 | 1.16 | 0 |
| 52 | Grenada       | Female | 70+ years        | 1.15 | 1.04 | 1.25 | 0 |
| 53 | Grenada       | Female | Age-standardized | 1.18 | 1.11 | 1.25 | 0 |
| 54 | Grenada       | Both   | All Ages         | 2.8  | 2.7  | 2.9  | 0 |
| 55 | Grenada       | Both   | 15-49 years      | 1.69 | 1.6  | 1.78 | 0 |
| 56 | Grenada       | Both   | 50-69 years      | 1.26 | 1.19 | 1.32 | 0 |
| 57 | Grenada       | Both   | 70+ years        | 1.27 | 1.2  | 1.34 | 0 |

|    |                |        |                  |      |      |      |   |
|----|----------------|--------|------------------|------|------|------|---|
| 1  |                |        |                  |      |      |      |   |
| 2  | Uzbekistan     | Both   | Age-standardized | 1.21 | 1.08 | 1.34 | 0 |
| 3  | Bolivia        | Male   | All Ages         | 2.52 | 2.42 | 2.61 | 0 |
| 4  | Bolivia        | Male   | 15-49 years      | 1.7  | 1.64 | 1.76 | 0 |
| 5  | Bolivia        | Male   | 50-69 years      | 1.38 | 1.31 | 1.46 | 0 |
| 6  | Bolivia        | Male   | 70+ years        | 1.19 | 1.1  | 1.29 | 0 |
| 7  | Bolivia        | Male   | Age-standardized | 1.46 | 1.39 | 1.54 | 0 |
| 8  | Bolivia        | Female | All Ages         | 2.12 | 2.02 | 2.22 | 0 |
| 9  | Bolivia        | Female | 15-49 years      | 1.29 | 1.2  | 1.38 | 0 |
| 10 | Bolivia        | Female | 50-69 years      | 1.09 | 1    | 1.19 | 0 |
| 11 | Bolivia        | Female | 70+ years        | 0.96 | 0.85 | 1.07 | 0 |
| 12 | Bolivia        | Female | Age-standardized | 1.11 | 1    | 1.21 | 0 |
| 13 | Bolivia        | Both   | All Ages         | 2.38 | 2.28 | 2.47 | 0 |
| 14 | Bolivia        | Both   | 15-49 years      | 1.58 | 1.52 | 1.65 | 0 |
| 15 | Bolivia        | Both   | 50-69 years      | 1.29 | 1.2  | 1.37 | 0 |
| 16 | Bolivia        | Both   | 70+ years        | 1.08 | 0.98 | 1.18 | 0 |
| 17 | Yemen          | Both   | Age-standardized | 1.2  | 1.18 | 1.22 | 0 |
| 18 | United Kingdom | Male   | All Ages         | 1.28 | 1.15 | 1.42 | 0 |
| 19 | United Kingdom | Male   | 15-49 years      | 1.15 | 0.99 | 1.31 | 0 |
| 20 | United Kingdom | Male   | 50-69 years      | 1.04 | 0.91 | 1.17 | 0 |
| 21 | United Kingdom | Male   | 70+ years        | 0.73 | 0.62 | 0.84 | 0 |
| 22 | United Kingdom | Male   | Age-standardized | 1.07 | 0.93 | 1.21 | 0 |
| 23 | United Kingdom | Female | All Ages         | 1.43 | 1.28 | 1.58 | 0 |
| 24 | United Kingdom | Female | 15-49 years      | 1.39 | 1.22 | 1.56 | 0 |
| 25 | United Kingdom | Female | 50-69 years      | 1.3  | 1.15 | 1.46 | 0 |
| 26 | United Kingdom | Female | 70+ years        | 1.14 | 1    | 1.27 | 0 |
| 27 | United Kingdom | Female | Age-standardized | 1.33 | 1.17 | 1.48 | 0 |
| 28 | United Kingdom | Both   | All Ages         | 1.36 | 1.22 | 1.5  | 0 |
| 29 | United Kingdom | Both   | 15-49 years      | 1.24 | 1.08 | 1.39 | 0 |
| 30 | United Kingdom | Both   | 50-69 years      | 1.15 | 1.01 | 1.29 | 0 |
| 31 | United Kingdom | Both   | 70+ years        | 1.07 | 0.95 | 1.19 | 0 |
| 32 | Angola         | Both   | Age-standardized | 1.2  | 1.11 | 1.29 | 0 |
| 33 | Belgium        | Male   | All Ages         | 1.2  | 1.04 | 1.37 | 0 |
| 34 | Belgium        | Male   | 15-49 years      | 1.09 | 0.91 | 1.27 | 0 |
| 35 | Belgium        | Male   | 50-69 years      | 0.93 | 0.8  | 1.07 | 0 |
| 36 | Belgium        | Male   | 70+ years        | 0.65 | 0.51 | 0.78 | 0 |
| 37 | Belgium        | Male   | Age-standardized | 0.97 | 0.83 | 1.11 | 0 |
| 38 | Belgium        | Female | All Ages         | 1.31 | 1.13 | 1.49 | 0 |
| 39 | Belgium        | Female | 15-49 years      | 1.23 | 1.02 | 1.45 | 0 |
| 40 | Belgium        | Female | 50-69 years      | 1.04 | 0.91 | 1.18 | 0 |
| 41 | Belgium        | Female | 70+ years        | 0.92 | 0.79 | 1.05 | 0 |
| 42 | Belgium        | Female | Age-standardized | 1.11 | 0.96 | 1.27 | 0 |
| 43 | Belgium        | Both   | All Ages         | 1.24 | 1.08 | 1.41 | 0 |
| 44 | Belgium        | Both   | 15-49 years      | 1.12 | 0.93 | 1.31 | 0 |
| 45 | Belgium        | Both   | 50-69 years      | 1    | 0.86 | 1.13 | 0 |
| 46 | Belgium        | Both   | 70+ years        | 0.89 | 0.75 | 1.02 | 0 |
| 47 | Colombia       | Both   | Age-standardized | 1.19 | 1.14 | 1.24 | 0 |
| 48 | Laos           | Male   | All Ages         | 1.82 | 1.66 | 1.99 | 0 |
| 49 | Laos           | Male   | 15-49 years      | 1.08 | 0.99 | 1.17 | 0 |
| 50 | Laos           | Male   | 50-69 years      | 0.94 | 0.86 | 1.01 | 0 |
| 51 | Laos           | Male   | 70+ years        | 0.77 | 0.71 | 0.84 | 0 |
| 52 | Laos           | Male   | Age-standardized | 0.95 | 0.88 | 1.03 | 0 |
| 53 | Laos           | Female | All Ages         | 1.67 | 1.52 | 1.82 | 0 |
| 54 | Laos           | Female | 15-49 years      | 1.03 | 0.96 | 1.11 | 0 |
| 55 | Laos           | Female | 50-69 years      | 0.96 | 0.93 | 1    | 0 |
| 56 | Laos           | Female | 70+ years        | 0.77 | 0.74 | 0.81 | 0 |
| 57 | Laos           | Female | Age-standardized | 0.91 | 0.87 | 0.95 | 0 |

|    |                |        |                  |      |      |      |   |
|----|----------------|--------|------------------|------|------|------|---|
| 1  |                |        |                  |      |      |      |   |
| 2  | Laos           | Both   | All Ages         | 1.76 | 1.61 | 1.92 | 0 |
| 3  | Laos           | Both   | 15-49 years      | 1.08 | 1.01 | 1.16 | 0 |
| 4  | Laos           | Both   | 50-69 years      | 0.96 | 0.91 | 1.02 | 0 |
| 5  | Laos           | Both   | 70+ years        | 0.77 | 0.72 | 0.81 | 0 |
| 6  | Gabon          | Both   | Age-standardized | 1.19 | 1.12 | 1.25 | 0 |
| 7  | Azerbaijan     | Male   | All Ages         | 1.98 | 1.84 | 2.12 | 0 |
| 8  | Azerbaijan     | Male   | 15-49 years      | 1.38 | 1.26 | 1.49 | 0 |
| 9  | Azerbaijan     | Male   | 50-69 years      | 0.5  | 0.37 | 0.62 | 0 |
| 10 | Azerbaijan     | Male   | 70+ years        | 1.12 | 1.09 | 1.16 | 0 |
| 11 | Azerbaijan     | Male   | Age-standardized | 0.98 | 0.86 | 1.1  | 0 |
| 12 | Azerbaijan     | Female | All Ages         | 2.02 | 1.82 | 2.21 | 0 |
| 13 | Azerbaijan     | Female | 15-49 years      | 1.35 | 1.25 | 1.46 | 0 |
| 14 | Azerbaijan     | Female | 50-69 years      | 0.75 | 0.66 | 0.85 | 0 |
| 15 | Azerbaijan     | Female | 70+ years        | 1.7  | 1.58 | 1.82 | 0 |
| 16 | Azerbaijan     | Female | Age-standardized | 1.16 | 1.02 | 1.3  | 0 |
| 17 | Azerbaijan     | Both   | All Ages         | 2.01 | 1.84 | 2.17 | 0 |
| 18 | Azerbaijan     | Both   | 15-49 years      | 1.39 | 1.27 | 1.5  | 0 |
| 19 | Azerbaijan     | Both   | 50-69 years      | 0.62 | 0.52 | 0.73 | 0 |
| 20 | Azerbaijan     | Both   | 70+ years        | 1.58 | 1.51 | 1.66 | 0 |
| 21 | Azerbaijan     | Both   | Age-standardized | 1.19 | 1.05 | 1.33 | 0 |
| 22 | United Kingdom | Both   | Age-standardized | 1.19 | 1.05 | 1.33 | 0 |
| 23 | Egypt          | Male   | All Ages         | 1.49 | 1.45 | 1.52 | 0 |
| 24 | Egypt          | Male   | 15-49 years      | 1.18 | 1.12 | 1.23 | 0 |
| 25 | Egypt          | Male   | 50-69 years      | 0.88 | 0.87 | 0.89 | 0 |
| 26 | Egypt          | Male   | 70+ years        | 0.77 | 0.76 | 0.78 | 0 |
| 27 | Egypt          | Male   | Age-standardized | 0.96 | 0.95 | 0.97 | 0 |
| 28 | Egypt          | Female | All Ages         | 1.58 | 1.54 | 1.61 | 0 |
| 29 | Egypt          | Female | 15-49 years      | 1.26 | 1.22 | 1.3  | 0 |
| 30 | Egypt          | Female | 50-69 years      | 1.06 | 1.05 | 1.08 | 0 |
| 31 | Egypt          | Female | 70+ years        | 0.93 | 0.91 | 0.96 | 0 |
| 32 | Egypt          | Female | Age-standardized | 1.1  | 1.09 | 1.11 | 0 |
| 33 | Egypt          | Both   | All Ages         | 1.53 | 1.5  | 1.56 | 0 |
| 34 | Egypt          | Both   | 15-49 years      | 1.21 | 1.16 | 1.26 | 0 |
| 35 | Egypt          | Both   | 50-69 years      | 0.98 | 0.97 | 0.99 | 0 |
| 36 | Egypt          | Both   | 70+ years        | 0.81 | 0.79 | 0.82 | 0 |
| 37 | Egypt          | Both   | Age-standardized | 1.19 | 1.09 | 1.3  | 0 |
| 38 | Luxembourg     | Both   | Age-standardized | 1.19 | 1.09 | 1.3  | 0 |
| 39 | Guinea         | Male   | All Ages         | 0.55 | 0.48 | 0.62 | 0 |
| 40 | Guinea         | Male   | 15-49 years      | 0.58 | 0.52 | 0.64 | 0 |
| 41 | Guinea         | Male   | 50-69 years      | 0.61 | 0.53 | 0.68 | 0 |
| 42 | Guinea         | Male   | 70+ years        | 0.64 | 0.59 | 0.68 | 0 |
| 43 | Guinea         | Male   | Age-standardized | 0.66 | 0.59 | 0.72 | 0 |
| 44 | Guinea         | Female | All Ages         | 0.29 | 0.21 | 0.37 | 0 |
| 45 | Guinea         | Female | 15-49 years      | 0.31 | 0.23 | 0.39 | 0 |
| 46 | Guinea         | Female | 50-69 years      | 0.34 | 0.29 | 0.4  | 0 |
| 47 | Guinea         | Female | 70+ years        | 0.49 | 0.47 | 0.52 | 0 |
| 48 | Guinea         | Female | Age-standardized | 0.44 | 0.4  | 0.49 | 0 |
| 49 | Guinea         | Both   | All Ages         | 0.44 | 0.37 | 0.5  | 0 |
| 50 | Guinea         | Both   | 15-49 years      | 0.44 | 0.38 | 0.5  | 0 |
| 51 | Guinea         | Both   | 50-69 years      | 0.56 | 0.49 | 0.64 | 0 |
| 52 | Guinea         | Both   | 70+ years        | 0.58 | 0.52 | 0.65 | 0 |
| 53 | Guinea         | Both   | Age-standardized | 1.19 | 1.08 | 1.29 | 0 |
| 54 | Sweden         | Both   | Age-standardized | 1.19 | 1.08 | 1.29 | 0 |
| 55 | Vanuatu        | Male   | All Ages         | 1.32 | 1.26 | 1.38 | 0 |
| 56 | Vanuatu        | Male   | 15-49 years      | 0.91 | 0.85 | 0.97 | 0 |
| 57 | Vanuatu        | Male   | 50-69 years      | 0.8  | 0.77 | 0.84 | 0 |
| 58 | Vanuatu        | Male   | 70+ years        | 0.72 | 0.69 | 0.74 | 0 |
| 59 | Vanuatu        | Male   | Age-standardized | 0.8  | 0.76 | 0.83 | 0 |
| 60 | Vanuatu        | Female | All Ages         | 1.76 | 1.71 | 1.81 | 0 |

|    |             |        |                  |      |      |      |   |
|----|-------------|--------|------------------|------|------|------|---|
| 1  |             |        |                  |      |      |      |   |
| 2  | Vanuatu     | Female | 15-49 years      | 1.23 | 1.19 | 1.27 | 0 |
| 3  | Vanuatu     | Female | 50-69 years      | 1.18 | 1.14 | 1.21 | 0 |
| 4  | Vanuatu     | Female | 70+ years        | 1    | 0.96 | 1.05 | 0 |
| 5  | Vanuatu     | Female | Age-standardized | 1.12 | 1.08 | 1.15 | 0 |
| 6  | Vanuatu     | Both   | All Ages         | 1.51 | 1.47 | 1.55 | 0 |
| 7  | Vanuatu     | Both   | 15-49 years      | 1.05 | 1.02 | 1.09 | 0 |
| 8  | Vanuatu     | Both   | 50-69 years      | 0.95 | 0.93 | 0.97 | 0 |
| 9  | Vanuatu     | Both   | 70+ years        | 0.82 | 0.8  | 0.84 | 0 |
| 10 | Botswana    | Both   | Age-standardized | 1.18 | 1.14 | 1.23 | 0 |
| 11 | Libya       | Male   | All Ages         | 2.25 | 2.2  | 2.3  | 0 |
| 12 | Libya       | Male   | 15-49 years      | 1.7  | 1.59 | 1.82 | 0 |
| 13 | Libya       | Male   | 50-69 years      | 0.94 | 0.91 | 0.96 | 0 |
| 14 | Libya       | Male   | 70+ years        | 0.81 | 0.79 | 0.83 | 0 |
| 15 | Libya       | Male   | Age-standardized | 1.03 | 1    | 1.06 | 0 |
| 16 | Libya       | Female | All Ages         | 2.87 | 2.8  | 2.93 | 0 |
| 17 | Libya       | Female | 15-49 years      | 2.15 | 2.03 | 2.28 | 0 |
| 18 | Libya       | Female | 50-69 years      | 1.26 | 1.17 | 1.35 | 0 |
| 19 | Libya       | Female | 70+ years        | 1.13 | 1.05 | 1.21 | 0 |
| 20 | Libya       | Female | Age-standardized | 1.3  | 1.21 | 1.4  | 0 |
| 21 | Libya       | Both   | All Ages         | 2.49 | 2.43 | 2.55 | 0 |
| 22 | Libya       | Both   | 15-49 years      | 1.87 | 1.74 | 2    | 0 |
| 23 | Libya       | Both   | 50-69 years      | 0.99 | 0.94 | 1.03 | 0 |
| 24 | Libya       | Both   | 70+ years        | 0.97 | 0.93 | 1.01 | 0 |
| 25 | New Zealand | Both   | Age-standardized | 1.18 | 1.07 | 1.29 | 0 |
| 26 | Estonia     | Male   | All Ages         | 1.46 | 1.39 | 1.52 | 0 |
| 27 | Estonia     | Male   | 15-49 years      | 1.04 | 0.91 | 1.17 | 0 |
| 28 | Estonia     | Male   | 50-69 years      | 0.52 | 0.47 | 0.56 | 0 |
| 29 | Estonia     | Male   | 70+ years        | 0.54 | 0.46 | 0.61 | 0 |
| 30 | Estonia     | Male   | Age-standardized | 0.71 | 0.62 | 0.8  | 0 |
| 31 | Estonia     | Female | All Ages         | 2.08 | 1.94 | 2.21 | 0 |
| 32 | Estonia     | Female | 15-49 years      | 1.27 | 1.16 | 1.38 | 0 |
| 33 | Estonia     | Female | 50-69 years      | 1.14 | 1.03 | 1.25 | 0 |
| 34 | Estonia     | Female | 70+ years        | 1.4  | 1.2  | 1.6  | 0 |
| 35 | Estonia     | Female | Age-standardized | 1.22 | 1.08 | 1.35 | 0 |
| 36 | Estonia     | Both   | All Ages         | 1.71 | 1.62 | 1.8  | 0 |
| 37 | Estonia     | Both   | 15-49 years      | 1.17 | 1.04 | 1.3  | 0 |
| 38 | Estonia     | Both   | 50-69 years      | 0.83 | 0.76 | 0.9  | 0 |
| 39 | Estonia     | Both   | 70+ years        | 1.12 | 0.97 | 1.27 | 0 |
| 40 | Jordan      | Both   | Age-standardized | 1.18 | 1.16 | 1.2  | 0 |
| 41 | India       | Male   | All Ages         | 1.47 | 1.42 | 1.51 | 0 |
| 42 | India       | Male   | 15-49 years      | 0.87 | 0.86 | 0.88 | 0 |
| 43 | India       | Male   | 50-69 years      | 0.74 | 0.72 | 0.75 | 0 |
| 44 | India       | Male   | 70+ years        | 0.73 | 0.7  | 0.76 | 0 |
| 45 | India       | Male   | Age-standardized | 0.77 | 0.76 | 0.78 | 0 |
| 46 | India       | Female | All Ages         | 1.52 | 1.46 | 1.58 | 0 |
| 47 | India       | Female | 15-49 years      | 0.82 | 0.78 | 0.86 | 0 |
| 48 | India       | Female | 50-69 years      | 0.68 | 0.65 | 0.72 | 0 |
| 49 | India       | Female | 70+ years        | 0.86 | 0.82 | 0.89 | 0 |
| 50 | India       | Female | Age-standardized | 0.71 | 0.68 | 0.75 | 0 |
| 51 | India       | Both   | All Ages         | 1.48 | 1.43 | 1.53 | 0 |
| 52 | India       | Both   | 15-49 years      | 0.85 | 0.83 | 0.86 | 0 |
| 53 | India       | Both   | 50-69 years      | 0.68 | 0.65 | 0.7  | 0 |
| 54 | India       | Both   | 70+ years        | 0.71 | 0.69 | 0.74 | 0 |
| 55 | Brazil      | Both   | Age-standardized | 1.18 | 1.15 | 1.2  | 0 |
| 56 | Portugal    | Male   | All Ages         | 1.6  | 1.43 | 1.76 | 0 |
| 57 | Portugal    | Male   | 15-49 years      | 1.35 | 1.19 | 1.51 | 0 |



|    |               |        |                  |      |      |      |   |
|----|---------------|--------|------------------|------|------|------|---|
| 1  |               |        |                  |      |      |      |   |
| 2  | Portugal      | Male   | 50-69 years      | 0.92 | 0.79 | 1.05 | 0 |
| 3  | Portugal      | Male   | 70+ years        | 0.61 | 0.49 | 0.74 | 0 |
| 4  | Portugal      | Male   | Age-standardized | 0.95 | 0.82 | 1.08 | 0 |
| 5  | Portugal      | Female | All Ages         | 1.91 | 1.74 | 2.08 | 0 |
| 6  | Portugal      | Female | 15-49 years      | 1.49 | 1.34 | 1.64 | 0 |
| 7  | Portugal      | Female | 50-69 years      | 1.27 | 1.09 | 1.46 | 0 |
| 8  | Portugal      | Female | 70+ years        | 0.98 | 0.84 | 1.12 | 0 |
| 9  | Portugal      | Female | Age-standardized | 1.19 | 1.04 | 1.34 | 0 |
| 10 | Portugal      | Both   | All Ages         | 1.74 | 1.57 | 1.91 | 0 |
| 11 | Portugal      | Both   | 15-49 years      | 1.4  | 1.24 | 1.56 | 0 |
| 12 | Portugal      | Both   | 50-69 years      | 1.1  | 0.94 | 1.26 | 0 |
| 13 | Portugal      | Both   | 70+ years        | 0.83 | 0.7  | 0.96 | 0 |
| 14 | Portugal      | Both   | Age-standardized | 1.17 | 1.13 | 1.2  | 0 |
| 15 | Seychelles    | Both   | All Ages         | 2.08 | 1.97 | 2.19 | 0 |
| 16 | Dominica      | Male   | 15-49 years      | 1.35 | 1.18 | 1.51 | 0 |
| 17 | Dominica      | Male   | 50-69 years      | 0.82 | 0.74 | 0.9  | 0 |
| 18 | Dominica      | Male   | 70+ years        | 0.72 | 0.64 | 0.8  | 0 |
| 19 | Dominica      | Male   | Age-standardized | 0.95 | 0.86 | 1.03 | 0 |
| 20 | Dominica      | Female | All Ages         | 1.68 | 1.65 | 1.71 | 0 |
| 21 | Dominica      | Female | 15-49 years      | 1.31 | 1.18 | 1.44 | 0 |
| 22 | Dominica      | Female | 50-69 years      | 0.84 | 0.75 | 0.93 | 0 |
| 23 | Dominica      | Female | 70+ years        | 0.81 | 0.73 | 0.89 | 0 |
| 24 | Dominica      | Female | Age-standardized | 0.93 | 0.85 | 1.01 | 0 |
| 25 | Dominica      | Both   | All Ages         | 1.95 | 1.87 | 2.02 | 0 |
| 26 | Dominica      | Both   | 15-49 years      | 1.31 | 1.15 | 1.46 | 0 |
| 27 | Dominica      | Both   | 50-69 years      | 1.05 | 0.95 | 1.15 | 0 |
| 28 | Dominica      | Both   | 70+ years        | 0.83 | 0.74 | 0.91 | 0 |
| 29 | Dominica      | Both   | Age-standardized | 1.17 | 1.08 | 1.25 | 0 |
| 30 | Guyana        | Both   | All Ages         | 1.38 | 1.11 | 1.64 | 0 |
| 31 | Rwanda        | Male   | 15-49 years      | 0.92 | 0.71 | 1.13 | 0 |
| 32 | Rwanda        | Male   | 50-69 years      | 0.73 | 0.58 | 0.87 | 0 |
| 33 | Rwanda        | Male   | 70+ years        | 0.82 | 0.69 | 0.95 | 0 |
| 34 | Rwanda        | Male   | Age-standardized | 0.83 | 0.69 | 0.96 | 0 |
| 35 | Rwanda        | Female | All Ages         | 0.99 | 0.8  | 1.18 | 0 |
| 36 | Rwanda        | Female | 15-49 years      | 0.5  | 0.33 | 0.68 | 0 |
| 37 | Rwanda        | Female | 50-69 years      | 0.23 | 0.12 | 0.33 | 0 |
| 38 | Rwanda        | Female | 70+ years        | 0.46 | 0.34 | 0.59 | 0 |
| 39 | Rwanda        | Female | Age-standardized | 0.36 | 0.24 | 0.47 | 0 |
| 40 | Rwanda        | Both   | All Ages         | 1.22 | 0.98 | 1.47 | 0 |
| 41 | Rwanda        | Both   | 15-49 years      | 0.77 | 0.56 | 0.99 | 0 |
| 42 | Rwanda        | Both   | 50-69 years      | 0.53 | 0.39 | 0.67 | 0 |
| 43 | Rwanda        | Both   | 70+ years        | 0.38 | 0.25 | 0.51 | 0 |
| 44 | Rwanda        | Both   | Age-standardized | 1.17 | 1.1  | 1.25 | 0 |
| 45 | Guinea-Bissau | Both   | All Ages         | 2.4  | 2.33 | 2.47 | 0 |
| 46 | Venezuela     | Male   | 15-49 years      | 1.61 | 1.55 | 1.67 | 0 |
| 47 | Venezuela     | Male   | 50-69 years      | 1.2  | 1.13 | 1.26 | 0 |
| 48 | Venezuela     | Male   | 70+ years        | 0.99 | 0.93 | 1.06 | 0 |
| 49 | Venezuela     | Male   | Age-standardized | 1.28 | 1.22 | 1.35 | 0 |
| 50 | Venezuela     | Female | All Ages         | 2.52 | 2.44 | 2.61 | 0 |
| 51 | Venezuela     | Female | 15-49 years      | 1.67 | 1.6  | 1.73 | 0 |
| 52 | Venezuela     | Female | 50-69 years      | 1.32 | 1.25 | 1.4  | 0 |
| 53 | Venezuela     | Female | 70+ years        | 1.13 | 1.06 | 1.21 | 0 |
| 54 | Venezuela     | Female | Age-standardized | 1.36 | 1.28 | 1.43 | 0 |
| 55 | Venezuela     | Both   | All Ages         | 2.45 | 2.38 | 2.53 | 0 |
| 56 | Venezuela     | Both   | 15-49 years      | 1.65 | 1.58 | 1.71 | 0 |
| 57 | Venezuela     | Both   | 50-69 years      | 1.25 | 1.18 | 1.31 | 0 |
| 58 | Venezuela     | Both   | Age-standardized | 1.17 | 1.08 | 1.25 | 0 |
| 59 | Venezuela     | Both   | All Ages         | 2.45 | 2.38 | 2.53 | 0 |
| 60 | Venezuela     | Both   | 15-49 years      | 1.65 | 1.58 | 1.71 | 0 |
|    | Venezuela     | Both   | 50-69 years      | 1.25 | 1.18 | 1.31 | 0 |



|    |             |        |                  |       |       |      |       |
|----|-------------|--------|------------------|-------|-------|------|-------|
| 1  |             |        |                  |       |       |      |       |
| 2  | Venezuela   | Both   | 70+ years        | 1.05  | 0.99  | 1.11 | 0     |
| 3  | Jamaica     | Both   | Age-standardized | 1.17  | 1.05  | 1.29 | 0     |
| 4  | Ethiopia    | Male   | All Ages         | 1.17  | 1.07  | 1.26 | 0     |
| 5  | Ethiopia    | Male   | 15-49 years      | 0.92  | 0.84  | 0.99 | 0     |
| 6  | Ethiopia    | Male   | 50-69 years      | 0.9   | 0.85  | 0.94 | 0     |
| 7  | Ethiopia    | Male   | 70+ years        | 0.86  | 0.82  | 0.9  | 0     |
| 8  | Ethiopia    | Male   | Age-standardized | 0.93  | 0.88  | 0.98 | 0     |
| 9  | Ethiopia    | Female | All Ages         | 0.18  | 0.04  | 0.31 | 0.012 |
| 10 | Ethiopia    | Female | 15-49 years      | -0.04 | -0.12 | 0.03 | 0.254 |
| 11 | Ethiopia    | Female | 50-69 years      | 0     | -0.04 | 0.03 | 0.801 |
| 12 | Ethiopia    | Female | 70+ years        | 0.05  | 0.02  | 0.08 | 0.004 |
| 13 | Ethiopia    | Female | Age-standardized | 0.02  | -0.01 | 0.04 | 0.112 |
| 14 | Ethiopia    | Both   | All Ages         | 0.85  | 0.74  | 0.96 | 0     |
| 15 | Ethiopia    | Both   | 15-49 years      | 0.63  | 0.56  | 0.7  | 0     |
| 16 | Ethiopia    | Both   | 50-69 years      | 0.56  | 0.55  | 0.57 | 0     |
| 17 | Ethiopia    | Both   | 70+ years        | 0.74  | 0.7   | 0.77 | 0     |
| 18 | Ethiopia    | Both   | Age-standardized | 1.16  | 1.04  | 1.27 | 0     |
| 19 | Puerto Rico | Both   | Age-standardized | 1.16  | 1.04  | 1.27 | 0     |
| 20 | Somalia     | Male   | All Ages         | 0.58  | 0.53  | 0.62 | 0     |
| 21 | Somalia     | Male   | 15-49 years      | 0.56  | 0.39  | 0.73 | 0     |
| 22 | Somalia     | Male   | 50-69 years      | 0.54  | 0.46  | 0.62 | 0     |
| 23 | Somalia     | Male   | 70+ years        | 0.57  | 0.5   | 0.63 | 0     |
| 24 | Somalia     | Male   | Age-standardized | 0.5   | 0.44  | 0.56 | 0     |
| 25 | Somalia     | Female | All Ages         | -0.01 | -0.05 | 0.04 | 0.816 |
| 26 | Somalia     | Female | 15-49 years      | -0.04 | -0.19 | 0.12 | 0.639 |
| 27 | Somalia     | Female | 50-69 years      | 0.01  | -0.07 | 0.08 | 0.888 |
| 28 | Somalia     | Female | 70+ years        | 0.12  | 0.06  | 0.18 | 0     |
| 29 | Somalia     | Female | Age-standardized | -0.01 | -0.07 | 0.05 | 0.716 |
| 30 | Somalia     | Both   | All Ages         | 0.35  | 0.3   | 0.4  | 0     |
| 31 | Somalia     | Both   | 15-49 years      | 0.34  | 0.18  | 0.5  | 0     |
| 32 | Somalia     | Both   | 50-69 years      | 0.31  | 0.23  | 0.39 | 0     |
| 33 | Somalia     | Both   | 70+ years        | 0.28  | 0.21  | 0.35 | 0     |
| 34 | Somalia     | Both   | Age-standardized | 1.16  | 1.14  | 1.18 | 0     |
| 35 | Syria       | Both   | Age-standardized | 1.16  | 1.14  | 1.18 | 0     |
| 36 | Togo        | Male   | All Ages         | 1.9   | 1.86  | 1.94 | 0     |
| 37 | Togo        | Male   | 15-49 years      | 1.44  | 1.38  | 1.51 | 0     |
| 38 | Togo        | Male   | 50-69 years      | 1.12  | 1.04  | 1.19 | 0     |
| 39 | Togo        | Male   | 70+ years        | 1.18  | 1.11  | 1.25 | 0     |
| 40 | Togo        | Male   | Age-standardized | 1.18  | 1.11  | 1.25 | 0     |
| 41 | Togo        | Female | All Ages         | 1.71  | 1.7   | 1.72 | 0     |
| 42 | Togo        | Female | 15-49 years      | 1.1   | 1.06  | 1.14 | 0     |
| 43 | Togo        | Female | 50-69 years      | 0.82  | 0.79  | 0.84 | 0     |
| 44 | Togo        | Female | 70+ years        | 0.96  | 0.93  | 0.99 | 0     |
| 45 | Togo        | Female | Age-standardized | 0.87  | 0.85  | 0.89 | 0     |
| 46 | Togo        | Both   | All Ages         | 1.83  | 1.8   | 1.86 | 0     |
| 47 | Togo        | Both   | 15-49 years      | 1.32  | 1.27  | 1.36 | 0     |
| 48 | Togo        | Both   | 50-69 years      | 0.96  | 0.89  | 1.03 | 0     |
| 49 | Togo        | Both   | 70+ years        | 0.83  | 0.79  | 0.86 | 0     |
| 50 | Togo        | Both   | Age-standardized | 1.16  | 1.13  | 1.19 | 0     |
| 51 | Lebanon     | Both   | Age-standardized | 1.16  | 1.13  | 1.19 | 0     |
| 52 | Oman        | Male   | All Ages         | 3.39  | 3.07  | 3.71 | 0     |
| 53 | Oman        | Male   | 15-49 years      | 2.3   | 2.06  | 2.53 | 0     |
| 54 | Oman        | Male   | 50-69 years      | 1.96  | 1.85  | 2.07 | 0     |
| 55 | Oman        | Male   | 70+ years        | 1.73  | 1.61  | 1.85 | 0     |
| 56 | Oman        | Male   | Age-standardized | 2.04  | 1.93  | 2.15 | 0     |
| 57 | Oman        | Female | All Ages         | 3.8   | 3.54  | 4.05 | 0     |
| 58 | Oman        | Female | 15-49 years      | 2.55  | 2.24  | 2.87 | 0     |
| 59 | Oman        | Female | 50-69 years      | 2.09  | 1.95  | 2.23 | 0     |
| 60 | Oman        | Female | 70+ years        | 1.95  | 1.78  | 2.13 | 0     |

|    |           |        |                  |      |      |      |   |
|----|-----------|--------|------------------|------|------|------|---|
| 1  |           |        |                  |      |      |      |   |
| 2  | Oman      | Female | Age-standardized | 2.13 | 1.98 | 2.27 | 0 |
| 3  | Oman      | Both   | All Ages         | 3.66 | 3.28 | 4.04 | 0 |
| 4  | Oman      | Both   | 15-49 years      | 2.46 | 2.11 | 2.81 | 0 |
| 5  | Oman      | Both   | 50-69 years      | 2.08 | 1.96 | 2.2  | 0 |
| 6  | Oman      | Both   | 70+ years        | 1.89 | 1.77 | 2.01 | 0 |
| 7  | Spain     | Both   | Age-standardized | 1.15 | 1.01 | 1.29 | 0 |
| 8  | Canada    | Male   | All Ages         | 1.36 | 1.26 | 1.46 | 0 |
| 9  | Canada    | Male   | 15-49 years      | 0.83 | 0.71 | 0.94 | 0 |
| 10 | Canada    | Male   | 50-69 years      | 0.83 | 0.75 | 0.9  | 0 |
| 11 | Canada    | Male   | 70+ years        | 0.5  | 0.42 | 0.58 | 0 |
| 12 | Canada    | Male   | Age-standardized | 0.81 | 0.72 | 0.89 | 0 |
| 13 | Canada    | Female | All Ages         | 1.14 | 1.05 | 1.23 | 0 |
| 14 | Canada    | Female | 15-49 years      | 0.53 | 0.43 | 0.64 | 0 |
| 15 | Canada    | Female | 50-69 years      | 0.54 | 0.5  | 0.58 | 0 |
| 16 | Canada    | Female | 70+ years        | 0.44 | 0.33 | 0.55 | 0 |
| 17 | Canada    | Female | Age-standardized | 0.55 | 0.46 | 0.63 | 0 |
| 18 | Canada    | Both   | All Ages         | 1.28 | 1.18 | 1.37 | 0 |
| 19 | Canada    | Both   | 15-49 years      | 0.72 | 0.62 | 0.83 | 0 |
| 20 | Canada    | Both   | 50-69 years      | 0.72 | 0.66 | 0.79 | 0 |
| 21 | Canada    | Both   | 70+ years        | 0.54 | 0.45 | 0.63 | 0 |
| 22 | Canada    | Both   | Age-standardized | 1.15 | 1.03 | 1.27 | 0 |
| 23 | Australia | Both   | All Ages         | 2.45 | 2.36 | 2.54 | 0 |
| 24 | Vietnam   | Male   | 15-49 years      | 1.4  | 1.37 | 1.43 | 0 |
| 25 | Vietnam   | Male   | 50-69 years      | 0.89 | 0.84 | 0.93 | 0 |
| 26 | Vietnam   | Male   | 70+ years        | 0.77 | 0.72 | 0.83 | 0 |
| 27 | Vietnam   | Male   | Age-standardized | 0.9  | 0.85 | 0.95 | 0 |
| 28 | Vietnam   | Female | All Ages         | 2.5  | 2.43 | 2.57 | 0 |
| 29 | Vietnam   | Female | 15-49 years      | 1.57 | 1.54 | 1.6  | 0 |
| 30 | Vietnam   | Female | 50-69 years      | 1.1  | 1.08 | 1.13 | 0 |
| 31 | Vietnam   | Female | 70+ years        | 0.95 | 0.91 | 1    | 0 |
| 32 | Vietnam   | Female | Age-standardized | 1.07 | 1.03 | 1.1  | 0 |
| 33 | Vietnam   | Both   | All Ages         | 2.48 | 2.39 | 2.56 | 0 |
| 34 | Vietnam   | Both   | 15-49 years      | 1.49 | 1.46 | 1.52 | 0 |
| 35 | Vietnam   | Both   | 50-69 years      | 1.01 | 0.98 | 1.04 | 0 |
| 36 | Vietnam   | Both   | 70+ years        | 0.88 | 0.83 | 0.93 | 0 |
| 37 | Vietnam   | Both   | Age-standardized | 1.15 | 1.13 | 1.18 | 0 |
| 38 | Iran      | Male   | All Ages         | 1.31 | 1.25 | 1.36 | 0 |
| 39 | Sudan     | Male   | 15-49 years      | 1.23 | 1.19 | 1.27 | 0 |
| 40 | Sudan     | Male   | 50-69 years      | 1.08 | 1.06 | 1.1  | 0 |
| 41 | Sudan     | Male   | 70+ years        | 0.82 | 0.81 | 0.84 | 0 |
| 42 | Sudan     | Male   | Age-standardized | 1.1  | 1.07 | 1.13 | 0 |
| 43 | Sudan     | Female | All Ages         | 1.39 | 1.28 | 1.49 | 0 |
| 44 | Sudan     | Female | 15-49 years      | 1.35 | 1.28 | 1.42 | 0 |
| 45 | Sudan     | Female | 50-69 years      | 1.18 | 1.15 | 1.21 | 0 |
| 46 | Sudan     | Female | 70+ years        | 0.96 | 0.92 | 0.99 | 0 |
| 47 | Sudan     | Female | Age-standardized | 1.19 | 1.15 | 1.22 | 0 |
| 48 | Sudan     | Both   | All Ages         | 1.34 | 1.27 | 1.41 | 0 |
| 49 | Sudan     | Both   | 15-49 years      | 1.28 | 1.24 | 1.32 | 0 |
| 50 | Sudan     | Both   | 50-69 years      | 1.14 | 1.13 | 1.16 | 0 |
| 51 | Sudan     | Both   | 70+ years        | 0.91 | 0.9  | 0.93 | 0 |
| 52 | Sudan     | Both   | Age-standardized | 1.15 | 1.1  | 1.2  | 0 |
| 53 | Haiti     | Both   | All Ages         | 1.67 | 1.54 | 1.79 | 0 |
| 54 | Cyprus    | Male   | 15-49 years      | 1.1  | 0.98 | 1.23 | 0 |
| 55 | Cyprus    | Male   | 50-69 years      | 0.93 | 0.79 | 1.07 | 0 |
| 56 | Cyprus    | Male   | 70+ years        | 0.72 | 0.6  | 0.83 | 0 |
| 57 | Cyprus    | Male   | Age-standardized | 0.94 | 0.79 | 1.09 | 0 |

|    |                                |        |                  |      |      |      |   |
|----|--------------------------------|--------|------------------|------|------|------|---|
| 1  |                                |        |                  |      |      |      |   |
| 2  | Cyprus                         | Female | All Ages         | 1.9  | 1.74 | 2.05 | 0 |
| 3  | Cyprus                         | Female | 15-49 years      | 1.36 | 1.2  | 1.51 | 0 |
| 4  | Cyprus                         | Female | 50-69 years      | 1.2  | 1.02 | 1.39 | 0 |
| 5  | Cyprus                         | Female | 70+ years        | 1.06 | 0.88 | 1.25 | 0 |
| 6  | Cyprus                         | Female | Age-standardized | 1.18 | 1    | 1.37 | 0 |
| 7  | Cyprus                         | Both   | All Ages         | 1.73 | 1.59 | 1.87 | 0 |
| 8  | Cyprus                         | Both   | 15-49 years      | 1.14 | 1.01 | 1.28 | 0 |
| 9  | Cyprus                         | Both   | 50-69 years      | 1.08 | 0.91 | 1.24 | 0 |
| 10 | Cyprus                         | Both   | 70+ years        | 0.87 | 0.74 | 1    | 0 |
| 11 | Chile                          | Both   | Age-standardized | 1.15 | 1.04 | 1.25 | 0 |
| 12 | Italy                          | Male   | All Ages         | 1.06 | 0.93 | 1.19 | 0 |
| 13 | Italy                          | Male   | 15-49 years      | 0.99 | 0.85 | 1.13 | 0 |
| 14 | Italy                          | Male   | 50-69 years      | 0.65 | 0.55 | 0.74 | 0 |
| 15 | Italy                          | Male   | 70+ years        | 0.42 | 0.33 | 0.5  | 0 |
| 16 | Italy                          | Male   | Age-standardized | 0.66 | 0.57 | 0.75 | 0 |
| 17 | Italy                          | Female | All Ages         | 1.38 | 1.21 | 1.54 | 0 |
| 18 | Italy                          | Female | 15-49 years      | 1.29 | 1.15 | 1.44 | 0 |
| 19 | Italy                          | Female | 50-69 years      | 0.93 | 0.77 | 1.08 | 0 |
| 20 | Italy                          | Female | 70+ years        | 0.71 | 0.59 | 0.83 | 0 |
| 21 | Italy                          | Female | Age-standardized | 0.92 | 0.79 | 1.05 | 0 |
| 22 | Italy                          | Both   | All Ages         | 1.21 | 1.07 | 1.35 | 0 |
| 23 | Italy                          | Both   | 15-49 years      | 1.11 | 0.98 | 1.25 | 0 |
| 24 | Italy                          | Both   | 50-69 years      | 0.79 | 0.67 | 0.91 | 0 |
| 25 | Italy                          | Both   | 70+ years        | 0.59 | 0.49 | 0.7  | 0 |
| 26 | Italy                          | Both   | Age-standardized | 1.15 | 1.09 | 1.21 | 0 |
| 27 | Trinidad and Tobago            | Both   | All Ages         | 1.93 | 1.87 | 1.98 | 0 |
| 28 | Benin                          | Male   | All Ages         | 1.58 | 1.49 | 1.67 | 0 |
| 29 | Benin                          | Male   | 15-49 years      | 1.45 | 1.37 | 1.53 | 0 |
| 30 | Benin                          | Male   | 50-69 years      | 1.45 | 1.36 | 1.54 | 0 |
| 31 | Benin                          | Male   | 70+ years        | 1.45 | 1.36 | 1.54 | 0 |
| 32 | Benin                          | Male   | Age-standardized | 1.54 | 1.45 | 1.63 | 0 |
| 33 | Benin                          | Female | All Ages         | 1.59 | 1.52 | 1.67 | 0 |
| 34 | Benin                          | Female | 15-49 years      | 1.43 | 1.33 | 1.54 | 0 |
| 35 | Benin                          | Female | 50-69 years      | 1.3  | 1.22 | 1.37 | 0 |
| 36 | Benin                          | Female | 70+ years        | 1.46 | 1.38 | 1.55 | 0 |
| 37 | Benin                          | Female | Age-standardized | 1.43 | 1.34 | 1.53 | 0 |
| 38 | Benin                          | Both   | All Ages         | 1.83 | 1.78 | 1.88 | 0 |
| 39 | Benin                          | Both   | 15-49 years      | 1.61 | 1.53 | 1.7  | 0 |
| 40 | Benin                          | Both   | 50-69 years      | 1.46 | 1.38 | 1.54 | 0 |
| 41 | Benin                          | Both   | 70+ years        | 1.22 | 1.16 | 1.27 | 0 |
| 42 | Benin                          | Both   | Age-standardized | 1.15 | 1.01 | 1.29 | 0 |
| 43 | Federated States of Micronesia | Both   | All Ages         | 2.07 | 2.01 | 2.12 | 0 |
| 44 | Puerto Rico                    | Male   | All Ages         | 1.34 | 1.24 | 1.44 | 0 |
| 45 | Puerto Rico                    | Male   | 15-49 years      | 1.03 | 0.96 | 1.1  | 0 |
| 46 | Puerto Rico                    | Male   | 50-69 years      | 0.73 | 0.69 | 0.77 | 0 |
| 47 | Puerto Rico                    | Male   | 70+ years        | 0.73 | 0.69 | 0.77 | 0 |
| 48 | Puerto Rico                    | Male   | Age-standardized | 1.06 | 0.99 | 1.14 | 0 |
| 49 | Puerto Rico                    | Female | All Ages         | 2.38 | 2.22 | 2.55 | 0 |
| 50 | Puerto Rico                    | Female | 15-49 years      | 1.43 | 1.24 | 1.63 | 0 |
| 51 | Puerto Rico                    | Female | 50-69 years      | 1.32 | 1.15 | 1.49 | 0 |
| 52 | Puerto Rico                    | Female | 70+ years        | 1.14 | 0.97 | 1.31 | 0 |
| 53 | Puerto Rico                    | Female | Age-standardized | 1.26 | 1.08 | 1.43 | 0 |
| 54 | Puerto Rico                    | Both   | All Ages         | 2.2  | 2.1  | 2.3  | 0 |
| 55 | Puerto Rico                    | Both   | 15-49 years      | 1.39 | 1.25 | 1.53 | 0 |
| 56 | Puerto Rico                    | Both   | 50-69 years      | 1.16 | 1.04 | 1.27 | 0 |
| 57 | Puerto Rico                    | Both   | 70+ years        | 0.89 | 0.8  | 0.99 | 0 |
| 58 | Puerto Rico                    | Both   | Age-standardized | 1.14 | 1.01 | 1.27 | 0 |
| 59 | Ireland                        | Both   | All Ages         | 1.66 | 1.61 | 1.71 | 0 |
| 60 | Macedonia                      | Male   | All Ages         | 1.66 | 1.61 | 1.71 | 0 |

|    |             |        |                  |      |      |      |   |
|----|-------------|--------|------------------|------|------|------|---|
| 1  |             |        |                  |      |      |      |   |
| 2  | Macedonia   | Male   | 15-49 years      | 1.01 | 0.96 | 1.07 | 0 |
| 3  | Macedonia   | Male   | 50-69 years      | 0.34 | 0.29 | 0.4  | 0 |
| 4  | Macedonia   | Male   | 70+ years        | 0.61 | 0.55 | 0.67 | 0 |
| 5  | Macedonia   | Male   | Age-standardized | 0.65 | 0.62 | 0.68 | 0 |
| 6  | Macedonia   | Female | All Ages         | 2.3  | 2.22 | 2.37 | 0 |
| 7  | Macedonia   | Female | 15-49 years      | 1.23 | 1.17 | 1.3  | 0 |
| 8  | Macedonia   | Female | 50-69 years      | 1.1  | 1.04 | 1.16 | 0 |
| 9  | Macedonia   | Female | 70+ years        | 1.33 | 1.27 | 1.39 | 0 |
| 10 | Macedonia   | Female | Age-standardized | 1.13 | 1.06 | 1.2  | 0 |
| 11 | Macedonia   | Both   | All Ages         | 1.92 | 1.86 | 1.97 | 0 |
| 12 | Macedonia   | Both   | 15-49 years      | 1.11 | 1.06 | 1.17 | 0 |
| 13 | Macedonia   | Both   | 50-69 years      | 0.69 | 0.65 | 0.74 | 0 |
| 14 | Macedonia   | Both   | 70+ years        | 0.89 | 0.84 | 0.93 | 0 |
| 15 | Macedonia   | Both   | Age-standardized | 1.14 | 1.12 | 1.17 | 0 |
| 16 | Sudan       | Both   | All Ages         | 1.28 | 1.2  | 1.35 | 0 |
| 17 | Latvia      | Male   | 15-49 years      | 0.76 | 0.63 | 0.89 | 0 |
| 18 | Latvia      | Male   | 50-69 years      | 0.28 | 0.25 | 0.3  | 0 |
| 19 | Latvia      | Male   | 70+ years        | 0.4  | 0.34 | 0.45 | 0 |
| 20 | Latvia      | Male   | Age-standardized | 0.45 | 0.38 | 0.53 | 0 |
| 21 | Latvia      | Female | All Ages         | 1.86 | 1.73 | 1.98 | 0 |
| 22 | Latvia      | Female | 15-49 years      | 0.97 | 0.85 | 1.1  | 0 |
| 23 | Latvia      | Female | 50-69 years      | 0.82 | 0.74 | 0.9  | 0 |
| 24 | Latvia      | Female | 70+ years        | 1.13 | 1    | 1.27 | 0 |
| 25 | Latvia      | Female | Age-standardized | 0.9  | 0.79 | 1    | 0 |
| 26 | Latvia      | Both   | All Ages         | 1.49 | 1.4  | 1.58 | 0 |
| 27 | Latvia      | Both   | 15-49 years      | 0.85 | 0.71 | 0.98 | 0 |
| 28 | Latvia      | Both   | 50-69 years      | 0.54 | 0.5  | 0.58 | 0 |
| 29 | Latvia      | Both   | 70+ years        | 0.88 | 0.76 | 0.99 | 0 |
| 30 | Latvia      | Both   | Age-standardized | 1.14 | 0.99 | 1.29 | 0 |
| 31 | Denmark     | Both   | All Ages         | 2.14 | 2.06 | 2.22 | 0 |
| 32 | Guatemala   | Male   | 15-49 years      | 1.34 | 1.32 | 1.36 | 0 |
| 33 | Guatemala   | Male   | 50-69 years      | 1.22 | 1.18 | 1.26 | 0 |
| 34 | Guatemala   | Male   | 70+ years        | 1.01 | 0.97 | 1.06 | 0 |
| 35 | Guatemala   | Male   | Age-standardized | 1.29 | 1.25 | 1.32 | 0 |
| 36 | Guatemala   | Female | All Ages         | 2.42 | 2.37 | 2.48 | 0 |
| 37 | Guatemala   | Female | 15-49 years      | 1.53 | 1.49 | 1.56 | 0 |
| 38 | Guatemala   | Female | 50-69 years      | 1.31 | 1.26 | 1.36 | 0 |
| 39 | Guatemala   | Female | 70+ years        | 1.2  | 1.14 | 1.26 | 0 |
| 40 | Guatemala   | Female | Age-standardized | 1.35 | 1.3  | 1.4  | 0 |
| 41 | Guatemala   | Both   | All Ages         | 2.25 | 2.18 | 2.32 | 0 |
| 42 | Guatemala   | Both   | 15-49 years      | 1.41 | 1.39 | 1.44 | 0 |
| 43 | Guatemala   | Both   | 50-69 years      | 1.19 | 1.15 | 1.24 | 0 |
| 44 | Guatemala   | Both   | 70+ years        | 1.03 | 0.98 | 1.08 | 0 |
| 45 | Guatemala   | Both   | Age-standardized | 1.13 | 1.07 | 1.19 | 0 |
| 46 | Netherlands | Both   | All Ages         | 1.37 | 1.28 | 1.47 | 0 |
| 47 | Kiribati    | Male   | 15-49 years      | 1.08 | 0.94 | 1.21 | 0 |
| 48 | Kiribati    | Male   | 50-69 years      | 0.89 | 0.77 | 1    | 0 |
| 49 | Kiribati    | Male   | 70+ years        | 0.77 | 0.67 | 0.88 | 0 |
| 50 | Kiribati    | Male   | Age-standardized | 0.97 | 0.85 | 1.09 | 0 |
| 51 | Kiribati    | Female | All Ages         | 1.72 | 1.59 | 1.85 | 0 |
| 52 | Kiribati    | Female | 15-49 years      | 1.37 | 1.22 | 1.52 | 0 |
| 53 | Kiribati    | Female | 50-69 years      | 1.29 | 1.15 | 1.42 | 0 |
| 54 | Kiribati    | Female | 70+ years        | 1.09 | 0.94 | 1.24 | 0 |
| 55 | Kiribati    | Female | Age-standardized | 1.28 | 1.14 | 1.43 | 0 |
| 56 | Kiribati    | Both   | All Ages         | 1.54 | 1.43 | 1.65 | 0 |
| 57 | Kiribati    | Both   | 15-49 years      | 1.22 | 1.08 | 1.36 | 0 |
| 58 | Kiribati    | Both   | 50-69 years      |      |      |      |   |
| 59 | Kiribati    | Both   | 70+ years        |      |      |      |   |
| 60 | Kiribati    | Both   | Age-standardized |      |      |      |   |

|    |          |        |                  |      |      |      |   |
|----|----------|--------|------------------|------|------|------|---|
| 1  |          |        |                  |      |      |      |   |
| 2  | Kiribati | Both   | 50-69 years      | 1.08 | 0.96 | 1.2  | 0 |
| 3  | Kiribati | Both   | 70+ years        | 0.94 | 0.81 | 1.07 | 0 |
| 4  | Greece   | Both   | Age-standardized | 1.13 | 0.96 | 1.29 | 0 |
| 5  | Guyana   | Male   | All Ages         | 2.14 | 2.08 | 2.21 | 0 |
| 6  | Guyana   | Male   | 15-49 years      | 1.47 | 1.3  | 1.63 | 0 |
| 7  | Guyana   | Male   | 50-69 years      | 1.1  | 1.03 | 1.17 | 0 |
| 8  | Guyana   | Male   | 70+ years        | 0.94 | 0.86 | 1.02 | 0 |
| 9  | Guyana   | Male   | Age-standardized | 1.19 | 1.11 | 1.27 | 0 |
| 10 | Guyana   | Female | All Ages         | 2.23 | 2.16 | 2.29 | 0 |
| 11 | Guyana   | Female | 15-49 years      | 1.44 | 1.27 | 1.61 | 0 |
| 12 | Guyana   | Female | 50-69 years      | 1.09 | 1.03 | 1.16 | 0 |
| 13 | Guyana   | Female | 70+ years        | 1.05 | 0.95 | 1.15 | 0 |
| 14 | Guyana   | Female | Age-standardized | 1.16 | 1.08 | 1.24 | 0 |
| 15 | Guyana   | Both   | All Ages         | 2.18 | 2.11 | 2.24 | 0 |
| 16 | Guyana   | Both   | 15-49 years      | 1.46 | 1.29 | 1.63 | 0 |
| 17 | Guyana   | Both   | 50-69 years      | 1.1  | 1.03 | 1.17 | 0 |
| 18 | Guyana   | Both   | 70+ years        | 0.95 | 0.87 | 1.04 | 0 |
| 19 | Guyana   | Both   | Age-standardized | 1.12 | 1.06 | 1.18 | 0 |
| 20 | Brunei   | Both   | Age-standardized | 1.12 | 1.06 | 1.18 | 0 |
| 21 | Israel   | Male   | All Ages         | 1.65 | 1.51 | 1.79 | 0 |
| 22 | Israel   | Male   | 15-49 years      | 1.51 | 1.38 | 1.64 | 0 |
| 23 | Israel   | Male   | 50-69 years      | 1.19 | 1.06 | 1.32 | 0 |
| 24 | Israel   | Male   | 70+ years        | 0.94 | 0.83 | 1.04 | 0 |
| 25 | Israel   | Male   | Age-standardized | 1.27 | 1.14 | 1.4  | 0 |
| 26 | Israel   | Female | All Ages         | 1.8  | 1.66 | 1.93 | 0 |
| 27 | Israel   | Female | 15-49 years      | 1.6  | 1.49 | 1.72 | 0 |
| 28 | Israel   | Female | 50-69 years      | 1.43 | 1.33 | 1.53 | 0 |
| 29 | Israel   | Female | 70+ years        | 1.15 | 1.03 | 1.27 | 0 |
| 30 | Israel   | Female | Age-standardized | 1.44 | 1.33 | 1.56 | 0 |
| 31 | Israel   | Both   | All Ages         | 1.72 | 1.58 | 1.85 | 0 |
| 32 | Israel   | Both   | 15-49 years      | 1.56 | 1.44 | 1.68 | 0 |
| 33 | Israel   | Both   | 50-69 years      | 1.32 | 1.2  | 1.44 | 0 |
| 34 | Israel   | Both   | 70+ years        | 1.02 | 0.92 | 1.12 | 0 |
| 35 | Israel   | Both   | Age-standardized | 1.12 | 0.99 | 1.25 | 0 |
| 36 | Kiribati | Both   | Age-standardized | 1.12 | 0.99 | 1.25 | 0 |
| 37 | Iran     | Male   | All Ages         | 3.03 | 2.96 | 3.1  | 0 |
| 38 | Iran     | Male   | 15-49 years      | 1.87 | 1.76 | 1.97 | 0 |
| 39 | Iran     | Male   | 50-69 years      | 1.1  | 1.08 | 1.13 | 0 |
| 40 | Iran     | Male   | 70+ years        | 0.85 | 0.81 | 0.89 | 0 |
| 41 | Iran     | Male   | Age-standardized | 1.19 | 1.16 | 1.22 | 0 |
| 42 | Iran     | Female | All Ages         | 3.09 | 3.02 | 3.16 | 0 |
| 43 | Iran     | Female | 15-49 years      | 1.78 | 1.64 | 1.92 | 0 |
| 44 | Iran     | Female | 50-69 years      | 1.13 | 1.11 | 1.15 | 0 |
| 45 | Iran     | Female | 70+ years        | 0.97 | 0.95 | 0.99 | 0 |
| 46 | Iran     | Female | Age-standardized | 1.14 | 1.11 | 1.17 | 0 |
| 47 | Iran     | Both   | All Ages         | 3.05 | 2.98 | 3.12 | 0 |
| 48 | Iran     | Both   | 15-49 years      | 1.84 | 1.73 | 1.96 | 0 |
| 49 | Iran     | Both   | 50-69 years      | 1.03 | 1.01 | 1.05 | 0 |
| 50 | Iran     | Both   | 70+ years        | 0.87 | 0.82 | 0.93 | 0 |
| 51 | Iran     | Both   | Age-standardized | 1.12 | 1.02 | 1.21 | 0 |
| 52 | Guam     | Both   | Age-standardized | 1.12 | 1.02 | 1.21 | 0 |
| 53 | Tonga    | Male   | All Ages         | 1.39 | 1.35 | 1.43 | 0 |
| 54 | Tonga    | Male   | 15-49 years      | 1.17 | 1.12 | 1.21 | 0 |
| 55 | Tonga    | Male   | 50-69 years      | 0.61 | 0.58 | 0.65 | 0 |
| 56 | Tonga    | Male   | 70+ years        | 0.5  | 0.47 | 0.52 | 0 |
| 57 | Tonga    | Male   | Age-standardized | 0.73 | 0.7  | 0.75 | 0 |
| 58 | Tonga    | Female | All Ages         | 1.65 | 1.61 | 1.7  | 0 |
| 59 | Tonga    | Female | 15-49 years      | 1.43 | 1.37 | 1.49 | 0 |
| 60 | Tonga    | Female | 50-69 years      | 1.1  | 1.05 | 1.15 | 0 |



|    |             |        |                  |      |      |      |   |
|----|-------------|--------|------------------|------|------|------|---|
| 1  |             |        |                  |      |      |      |   |
| 2  | Tonga       | Female | 70+ years        | 0.82 | 0.76 | 0.88 | 0 |
| 3  | Tonga       | Female | Age-standardized | 1.08 | 1.04 | 1.13 | 0 |
| 4  | Tonga       | Both   | All Ages         | 1.52 | 1.48 | 1.55 | 0 |
| 5  | Tonga       | Both   | 15-49 years      | 1.3  | 1.25 | 1.35 | 0 |
| 6  | Tonga       | Both   | 50-69 years      | 0.86 | 0.82 | 0.9  | 0 |
| 7  | Tonga       | Both   | 70+ years        | 0.66 | 0.62 | 0.7  | 0 |
| 8  | Azerbaijan  | Both   | Age-standardized | 1.1  | 0.97 | 1.23 | 0 |
| 9  | Liberia     | Male   | All Ages         | 0.85 | 0.63 | 1.06 | 0 |
| 10 | Liberia     | Male   | 15-49 years      | 0.95 | 0.71 | 1.18 | 0 |
| 11 | Liberia     | Male   | 50-69 years      | 0.84 | 0.69 | 0.98 | 0 |
| 12 | Liberia     | Male   | 70+ years        | 0.79 | 0.67 | 0.91 | 0 |
| 13 | Liberia     | Male   | Age-standardized | 0.9  | 0.76 | 1.05 | 0 |
| 14 | Liberia     | Female | All Ages         | 1.04 | 0.84 | 1.25 | 0 |
| 15 | Liberia     | Female | 15-49 years      | 1    | 0.77 | 1.23 | 0 |
| 16 | Liberia     | Female | 50-69 years      | 0.78 | 0.62 | 0.94 | 0 |
| 17 | Liberia     | Female | 70+ years        | 0.93 | 0.78 | 1.09 | 0 |
| 18 | Liberia     | Female | Age-standardized | 0.89 | 0.73 | 1.05 | 0 |
| 19 | Liberia     | Both   | All Ages         | 0.92 | 0.71 | 1.13 | 0 |
| 20 | Liberia     | Both   | 15-49 years      | 0.97 | 0.74 | 1.2  | 0 |
| 21 | Liberia     | Both   | 50-69 years      | 0.79 | 0.63 | 0.95 | 0 |
| 22 | Liberia     | Both   | 70+ years        | 0.71 | 0.59 | 0.84 | 0 |
| 23 | Libya       | Both   | Age-standardized | 1.1  | 1.04 | 1.16 | 0 |
| 24 | France      | Male   | All Ages         | 1.52 | 1.37 | 1.66 | 0 |
| 25 | France      | Male   | 15-49 years      | 1.31 | 1.17 | 1.46 | 0 |
| 26 | France      | Male   | 50-69 years      | 1.16 | 1.05 | 1.27 | 0 |
| 27 | France      | Male   | 70+ years        | 0.85 | 0.73 | 0.98 | 0 |
| 28 | France      | Male   | Age-standardized | 1.18 | 1.07 | 1.3  | 0 |
| 29 | France      | Female | All Ages         | 1.73 | 1.59 | 1.88 | 0 |
| 30 | France      | Female | 15-49 years      | 1.53 | 1.37 | 1.68 | 0 |
| 31 | France      | Female | 50-69 years      | 1.33 | 1.23 | 1.44 | 0 |
| 32 | France      | Female | 70+ years        | 1.19 | 1.07 | 1.31 | 0 |
| 33 | France      | Female | Age-standardized | 1.38 | 1.26 | 1.49 | 0 |
| 34 | France      | Both   | All Ages         | 1.58 | 1.44 | 1.73 | 0 |
| 35 | France      | Both   | 15-49 years      | 1.36 | 1.22 | 1.5  | 0 |
| 36 | France      | Both   | 50-69 years      | 1.23 | 1.12 | 1.35 | 0 |
| 37 | France      | Both   | 70+ years        | 1.11 | 0.98 | 1.23 | 0 |
| 38 | Norway      | Both   | Age-standardized | 1.1  | 0.98 | 1.22 | 0 |
| 39 | Serbia      | Male   | All Ages         | 1.05 | 1.01 | 1.09 | 0 |
| 40 | Serbia      | Male   | 15-49 years      | 0.77 | 0.69 | 0.85 | 0 |
| 41 | Serbia      | Male   | 50-69 years      | 0.17 | 0.1  | 0.24 | 0 |
| 42 | Serbia      | Male   | 70+ years        | 0.38 | 0.32 | 0.43 | 0 |
| 43 | Serbia      | Male   | Age-standardized | 0.49 | 0.43 | 0.54 | 0 |
| 44 | Serbia      | Female | All Ages         | 1.83 | 1.75 | 1.9  | 0 |
| 45 | Serbia      | Female | 15-49 years      | 0.95 | 0.87 | 1.03 | 0 |
| 46 | Serbia      | Female | 50-69 years      | 0.86 | 0.78 | 0.94 | 0 |
| 47 | Serbia      | Female | 70+ years        | 1.15 | 1.09 | 1.2  | 0 |
| 48 | Serbia      | Female | Age-standardized | 0.9  | 0.81 | 0.99 | 0 |
| 49 | Serbia      | Both   | All Ages         | 1.37 | 1.32 | 1.42 | 0 |
| 50 | Serbia      | Both   | 15-49 years      | 0.83 | 0.74 | 0.91 | 0 |
| 51 | Serbia      | Both   | 50-69 years      | 0.47 | 0.4  | 0.54 | 0 |
| 52 | Serbia      | Both   | 70+ years        | 0.75 | 0.71 | 0.79 | 0 |
| 53 | Switzerland | Both   | Age-standardized | 1.09 | 1.01 | 1.17 | 0 |
| 54 | Netherlands | Male   | All Ages         | 1.47 | 1.4  | 1.55 | 0 |
| 55 | Netherlands | Male   | 15-49 years      | 1.18 | 1.05 | 1.32 | 0 |
| 56 | Netherlands | Male   | 50-69 years      | 1.1  | 1.02 | 1.17 | 0 |
| 57 | Netherlands | Male   | 70+ years        | 0.83 | 0.76 | 0.9  | 0 |



|    |             |        |                  |      |      |      |       |
|----|-------------|--------|------------------|------|------|------|-------|
| 1  |             |        |                  |      |      |      |       |
| 2  | Netherlands | Male   | Age-standardized | 1.1  | 1.02 | 1.18 | 0     |
| 3  | Netherlands | Female | All Ages         | 1.46 | 1.44 | 1.48 | 0     |
| 4  | Netherlands | Female | 15-49 years      | 1.33 | 1.24 | 1.42 | 0     |
| 5  | Netherlands | Female | 50-69 years      | 1.04 | 1    | 1.08 | 0     |
| 6  | Netherlands | Female | 70+ years        | 0.84 | 0.78 | 0.89 | 0     |
| 7  | Netherlands | Female | Age-standardized | 1.15 | 1.12 | 1.18 | 0     |
| 8  | Netherlands | Both   | All Ages         | 1.47 | 1.42 | 1.52 | 0     |
| 9  | Netherlands | Both   | 15-49 years      | 1.2  | 1.08 | 1.32 | 0     |
| 10 | Netherlands | Both   | 50-69 years      | 1.12 | 1.06 | 1.18 | 0     |
| 11 | Netherlands | Both   | 70+ years        | 1    | 0.96 | 1.04 | 0     |
| 12 | Netherlands | Both   | Age-standardized | 1.09 | 1.03 | 1.14 | 0     |
| 13 | Mexico      | Both   | Age-standardized | 1.09 | 1.03 | 1.14 | 0     |
| 14 | Lesotho     | Male   | All Ages         | 1.45 | 1.43 | 1.48 | 0     |
| 15 | Lesotho     | Male   | 15-49 years      | 1.05 | 0.98 | 1.12 | 0     |
| 16 | Lesotho     | Male   | 50-69 years      | 0.78 | 0.76 | 0.79 | 0     |
| 17 | Lesotho     | Male   | 70+ years        | 0.67 | 0.65 | 0.69 | 0     |
| 18 | Lesotho     | Male   | Age-standardized | 0.84 | 0.82 | 0.85 | 0     |
| 19 | Lesotho     | Female | All Ages         | 1.61 | 1.58 | 1.63 | 0     |
| 20 | Lesotho     | Female | 15-49 years      | 1.11 | 1.04 | 1.17 | 0     |
| 21 | Lesotho     | Female | 50-69 years      | 0.85 | 0.81 | 0.89 | 0     |
| 22 | Lesotho     | Female | 70+ years        | 0.97 | 0.92 | 1.01 | 0     |
| 23 | Lesotho     | Female | Age-standardized | 0.92 | 0.9  | 0.95 | 0     |
| 24 | Lesotho     | Both   | All Ages         | 1.51 | 1.48 | 1.53 | 0     |
| 25 | Lesotho     | Both   | 15-49 years      | 1.1  | 1.03 | 1.17 | 0     |
| 26 | Lesotho     | Both   | 50-69 years      | 0.66 | 0.65 | 0.68 | 0     |
| 27 | Lesotho     | Both   | 70+ years        | 0.7  | 0.67 | 0.73 | 0     |
| 28 | Lesotho     | Both   | Age-standardized | 1.09 | 1.01 | 1.17 | 0     |
| 29 | Bangladesh  | Both   | Age-standardized | 1.09 | 1.01 | 1.17 | 0     |
| 30 | Ukraine     | Male   | All Ages         | 1.03 | 1    | 1.06 | 0     |
| 31 | Ukraine     | Male   | 15-49 years      | 0.72 | 0.59 | 0.85 | 0     |
| 32 | Ukraine     | Male   | 50-69 years      | 0.14 | 0.06 | 0.23 | 0.002 |
| 33 | Ukraine     | Male   | 70+ years        | 0.36 | 0.34 | 0.37 | 0     |
| 34 | Ukraine     | Male   | Age-standardized | 0.43 | 0.35 | 0.5  | 0     |
| 35 | Ukraine     | Female | All Ages         | 1.68 | 1.58 | 1.78 | 0     |
| 36 | Ukraine     | Female | 15-49 years      | 1.22 | 1.11 | 1.33 | 0     |
| 37 | Ukraine     | Female | 50-69 years      | 0.89 | 0.81 | 0.98 | 0     |
| 38 | Ukraine     | Female | 70+ years        | 1.32 | 1.2  | 1.44 | 0     |
| 39 | Ukraine     | Female | Age-standardized | 1.13 | 1.02 | 1.24 | 0     |
| 40 | Ukraine     | Both   | All Ages         | 1.28 | 1.23 | 1.34 | 0     |
| 41 | Ukraine     | Both   | 15-49 years      | 0.87 | 0.75 | 1    | 0     |
| 42 | Ukraine     | Both   | 50-69 years      | 0.45 | 0.38 | 0.53 | 0     |
| 43 | Ukraine     | Both   | 70+ years        | 1.03 | 0.96 | 1.1  | 0     |
| 44 | Ukraine     | Both   | Age-standardized | 1.08 | 1.06 | 1.09 | 0     |
| 45 | Mali        | Both   | Age-standardized | 1.08 | 1.06 | 1.09 | 0     |
| 46 | Ecuador     | Male   | All Ages         | 1.84 | 1.78 | 1.91 | 0     |
| 47 | Ecuador     | Male   | 15-49 years      | 1.18 | 1.13 | 1.24 | 0     |
| 48 | Ecuador     | Male   | 50-69 years      | 0.84 | 0.79 | 0.89 | 0     |
| 49 | Ecuador     | Male   | 70+ years        | 0.67 | 0.61 | 0.73 | 0     |
| 50 | Ecuador     | Male   | Age-standardized | 0.91 | 0.86 | 0.96 | 0     |
| 51 | Ecuador     | Female | All Ages         | 1.6  | 1.51 | 1.69 | 0     |
| 52 | Ecuador     | Female | 15-49 years      | 0.88 | 0.79 | 0.96 | 0     |
| 53 | Ecuador     | Female | 50-69 years      | 0.62 | 0.55 | 0.7  | 0     |
| 54 | Ecuador     | Female | 70+ years        | 0.53 | 0.44 | 0.62 | 0     |
| 55 | Ecuador     | Female | Age-standardized | 0.62 | 0.55 | 0.7  | 0     |
| 56 | Ecuador     | Both   | All Ages         | 1.74 | 1.67 | 1.82 | 0     |
| 57 | Ecuador     | Both   | 15-49 years      | 1.06 | 1    | 1.13 | 0     |
| 58 | Ecuador     | Both   | 50-69 years      | 0.74 | 0.68 | 0.8  | 0     |
| 59 | Ecuador     | Both   | 70+ years        | 0.6  | 0.52 | 0.67 | 0     |
| 60 | Ecuador     | Both   | Age-standardized | 1.08 | 1.05 | 1.11 | 0     |
|    | Qatar       | Both   | Age-standardized | 1.08 | 1.05 | 1.11 | 0     |

|    |               |        |                  |      |      |      |   |
|----|---------------|--------|------------------|------|------|------|---|
| 1  |               |        |                  |      |      |      |   |
| 2  | Myanmar       | Male   | All Ages         | 1.97 | 1.88 | 2.07 | 0 |
| 3  | Myanmar       | Male   | 15-49 years      | 1.43 | 1.34 | 1.52 | 0 |
| 4  | Myanmar       | Male   | 50-69 years      | 1.12 | 1.02 | 1.21 | 0 |
| 5  | Myanmar       | Male   | 70+ years        | 0.93 | 0.85 | 1.01 | 0 |
| 6  | Myanmar       | Male   | Age-standardized | 1.12 | 1.03 | 1.22 | 0 |
| 7  | Myanmar       | Female | All Ages         | 2.07 | 2.01 | 2.13 | 0 |
| 8  | Myanmar       | Female | 15-49 years      | 1.41 | 1.36 | 1.45 | 0 |
| 9  | Myanmar       | Female | 50-69 years      | 1.09 | 1.06 | 1.13 | 0 |
| 10 | Myanmar       | Female | 70+ years        | 0.89 | 0.85 | 0.93 | 0 |
| 11 | Myanmar       | Female | Age-standardized | 1.04 | 1    | 1.09 | 0 |
| 12 | Myanmar       | Both   | All Ages         | 2    | 1.92 | 2.08 | 0 |
| 13 | Myanmar       | Both   | 15-49 years      | 1.41 | 1.34 | 1.48 | 0 |
| 14 | Myanmar       | Both   | 50-69 years      | 1.07 | 1    | 1.14 | 0 |
| 15 | Myanmar       | Both   | 70+ years        | 0.86 | 0.81 | 0.92 | 0 |
| 16 | Myanmar       | Both   | Age-standardized | 1.08 | 0.97 | 1.18 | 0 |
| 17 | Saint Lucia   | Both   | All Ages         | 2.46 | 2.25 | 2.66 | 0 |
| 18 | Nepal         | Male   | 15-49 years      | 1.67 | 1.51 | 1.83 | 0 |
| 19 | Nepal         | Male   | 50-69 years      | 1.58 | 1.42 | 1.73 | 0 |
| 20 | Nepal         | Male   | 70+ years        | 1.61 | 1.47 | 1.75 | 0 |
| 21 | Nepal         | Male   | Age-standardized | 1.63 | 1.48 | 1.79 | 0 |
| 22 | Nepal         | Female | All Ages         | 2.56 | 2.28 | 2.83 | 0 |
| 23 | Nepal         | Female | 15-49 years      | 1.67 | 1.46 | 1.89 | 0 |
| 24 | Nepal         | Female | 50-69 years      | 1.54 | 1.35 | 1.73 | 0 |
| 25 | Nepal         | Female | 70+ years        | 1.65 | 1.48 | 1.83 | 0 |
| 26 | Nepal         | Female | Age-standardized | 1.58 | 1.39 | 1.77 | 0 |
| 27 | Nepal         | Both   | All Ages         | 2.47 | 2.24 | 2.7  | 0 |
| 28 | Nepal         | Both   | 15-49 years      | 1.62 | 1.45 | 1.8  | 0 |
| 29 | Nepal         | Both   | 50-69 years      | 1.51 | 1.35 | 1.68 | 0 |
| 30 | Nepal         | Both   | 70+ years        | 1.58 | 1.43 | 1.73 | 0 |
| 31 | Nepal         | Both   | Age-standardized | 1.08 | 0.94 | 1.22 | 0 |
| 32 | Cote d'Ivoire | Both   | All Ages         | 1.53 | 1.45 | 1.61 | 0 |
| 33 | Namibia       | Male   | 15-49 years      | 1.2  | 1.14 | 1.26 | 0 |
| 34 | Namibia       | Male   | 50-69 years      | 0.92 | 0.86 | 0.97 | 0 |
| 35 | Namibia       | Male   | 70+ years        | 0.89 | 0.84 | 0.93 | 0 |
| 36 | Namibia       | Male   | Age-standardized | 0.99 | 0.94 | 1.04 | 0 |
| 37 | Namibia       | Female | All Ages         | 1.64 | 1.55 | 1.72 | 0 |
| 38 | Namibia       | Female | 15-49 years      | 1.18 | 1.13 | 1.24 | 0 |
| 39 | Namibia       | Female | 50-69 years      | 0.98 | 0.95 | 1.02 | 0 |
| 40 | Namibia       | Female | 70+ years        | 1.08 | 1.04 | 1.13 | 0 |
| 41 | Namibia       | Female | Age-standardized | 1.03 | 0.99 | 1.07 | 0 |
| 42 | Namibia       | Both   | All Ages         | 1.57 | 1.5  | 1.65 | 0 |
| 43 | Namibia       | Both   | 15-49 years      | 1.2  | 1.15 | 1.26 | 0 |
| 44 | Namibia       | Both   | 50-69 years      | 0.89 | 0.85 | 0.93 | 0 |
| 45 | Namibia       | Both   | 70+ years        | 0.89 | 0.85 | 0.93 | 0 |
| 46 | Namibia       | Both   | Age-standardized | 1.06 | 0.92 | 1.21 | 0 |
| 47 | Portugal      | Both   | All Ages         | 1.27 | 1.25 | 1.3  | 0 |
| 48 | Mauritania    | Male   | 15-49 years      | 1.09 | 1.04 | 1.14 | 0 |
| 49 | Mauritania    | Male   | 50-69 years      | 0.99 | 0.97 | 1.01 | 0 |
| 50 | Mauritania    | Male   | 70+ years        | 0.9  | 0.86 | 0.93 | 0 |
| 51 | Mauritania    | Male   | Age-standardized | 1.04 | 1.01 | 1.07 | 0 |
| 52 | Mauritania    | Female | All Ages         | 1.16 | 1.14 | 1.19 | 0 |
| 53 | Mauritania    | Female | 15-49 years      | 1.07 | 1.01 | 1.12 | 0 |
| 54 | Mauritania    | Female | 50-69 years      | 0.93 | 0.9  | 0.97 | 0 |
| 55 | Mauritania    | Female | 70+ years        | 1.08 | 1.05 | 1.12 | 0 |
| 56 | Mauritania    | Female | Age-standardized | 1.03 | 0.99 | 1.07 | 0 |
| 57 | Mauritania    | Both   | All Ages         | 1.22 | 1.2  | 1.25 | 0 |
| 58 | Mauritania    | Both   | All Ages         | 1.22 | 1.2  | 1.25 | 0 |

|    |                      |        |                  |      |      |      |   |
|----|----------------------|--------|------------------|------|------|------|---|
| 1  |                      |        |                  |      |      |      |   |
| 2  | Mauritania           | Both   | 15-49 years      | 1.07 | 1.02 | 1.12 | 0 |
| 3  | Mauritania           | Both   | 50-69 years      | 0.98 | 0.94 | 1.01 | 0 |
| 4  | Mauritania           | Both   | 70+ years        | 1.08 | 1.04 | 1.13 | 0 |
| 5  | Myanmar              | Both   | Age-standardized | 1.06 | 0.99 | 1.13 | 0 |
| 6  | Georgia              | Male   | All Ages         | 1.4  | 1.36 | 1.45 | 0 |
| 7  | Georgia              | Male   | 15-49 years      | 1.01 | 0.94 | 1.07 | 0 |
| 8  | Georgia              | Male   | 50-69 years      | 0.42 | 0.34 | 0.5  | 0 |
| 9  | Georgia              | Male   | 70+ years        | 0.83 | 0.78 | 0.88 | 0 |
| 10 | Georgia              | Male   | Age-standardized | 0.72 | 0.66 | 0.79 | 0 |
| 11 | Georgia              | Female | All Ages         | 1.7  | 1.61 | 1.8  | 0 |
| 12 | Georgia              | Female | 15-49 years      | 1.07 | 1.01 | 1.13 | 0 |
| 13 | Georgia              | Female | 50-69 years      | 0.82 | 0.71 | 0.94 | 0 |
| 14 | Georgia              | Female | 70+ years        | 1.19 | 1.11 | 1.27 | 0 |
| 15 | Georgia              | Female | Age-standardized | 0.95 | 0.89 | 1.02 | 0 |
| 16 | Georgia              | Both   | All Ages         | 1.55 | 1.48 | 1.62 | 0 |
| 17 | Georgia              | Both   | 15-49 years      | 1.06 | 1.02 | 1.1  | 0 |
| 18 | Georgia              | Both   | 50-69 years      | 0.61 | 0.52 | 0.7  | 0 |
| 19 | Georgia              | Both   | 70+ years        | 1.12 | 1.04 | 1.2  | 0 |
| 20 | Georgia              | Both   | Age-standardized | 1.06 | 0.98 | 1.14 | 0 |
| 21 | Cuba                 | Both   | Age-standardized | 1.06 | 0.98 | 1.14 | 0 |
| 22 | Cape Verde           | Male   | All Ages         | 2.75 | 2.58 | 2.92 | 0 |
| 23 | Cape Verde           | Male   | 15-49 years      | 1.73 | 1.66 | 1.79 | 0 |
| 24 | Cape Verde           | Male   | 50-69 years      | 1    | 0.98 | 1.03 | 0 |
| 25 | Cape Verde           | Male   | 70+ years        | 1.06 | 1.01 | 1.1  | 0 |
| 26 | Cape Verde           | Male   | Age-standardized | 1.18 | 1.14 | 1.22 | 0 |
| 27 | Cape Verde           | Female | All Ages         | 2.05 | 1.89 | 2.22 | 0 |
| 28 | Cape Verde           | Female | 15-49 years      | 1.22 | 1.12 | 1.31 | 0 |
| 29 | Cape Verde           | Female | 50-69 years      | 0.8  | 0.73 | 0.87 | 0 |
| 30 | Cape Verde           | Female | 70+ years        | 1.09 | 1.03 | 1.15 | 0 |
| 31 | Cape Verde           | Female | Age-standardized | 0.97 | 0.92 | 1.02 | 0 |
| 32 | Cape Verde           | Both   | All Ages         | 2.52 | 2.35 | 2.69 | 0 |
| 33 | Cape Verde           | Both   | 15-49 years      | 1.65 | 1.58 | 1.72 | 0 |
| 34 | Cape Verde           | Both   | 50-69 years      | 1.01 | 0.94 | 1.07 | 0 |
| 35 | Cape Verde           | Both   | 70+ years        | 1.03 | 1    | 1.06 | 0 |
| 36 | Cape Verde           | Both   | Age-standardized | 1.05 | 1.01 | 1.08 | 0 |
| 37 | Bhutan               | Both   | Age-standardized | 1.05 | 1.01 | 1.08 | 0 |
| 38 | Honduras             | Male   | All Ages         | 2.23 | 2.17 | 2.3  | 0 |
| 39 | Honduras             | Male   | 15-49 years      | 1.42 | 1.37 | 1.47 | 0 |
| 40 | Honduras             | Male   | 50-69 years      | 1.26 | 1.16 | 1.35 | 0 |
| 41 | Honduras             | Male   | 70+ years        | 1.06 | 0.98 | 1.14 | 0 |
| 42 | Honduras             | Male   | Age-standardized | 1.26 | 1.19 | 1.34 | 0 |
| 43 | Honduras             | Female | All Ages         | 2.43 | 2.36 | 2.5  | 0 |
| 44 | Honduras             | Female | 15-49 years      | 1.6  | 1.53 | 1.67 | 0 |
| 45 | Honduras             | Female | 50-69 years      | 1.35 | 1.27 | 1.44 | 0 |
| 46 | Honduras             | Female | 70+ years        | 1.27 | 1.19 | 1.34 | 0 |
| 47 | Honduras             | Female | Age-standardized | 1.39 | 1.3  | 1.48 | 0 |
| 48 | Honduras             | Both   | All Ages         | 2.3  | 2.24 | 2.37 | 0 |
| 49 | Honduras             | Both   | 15-49 years      | 1.48 | 1.42 | 1.54 | 0 |
| 50 | Honduras             | Both   | 50-69 years      | 1.27 | 1.18 | 1.37 | 0 |
| 51 | Honduras             | Both   | 70+ years        | 1.14 | 1.07 | 1.22 | 0 |
| 52 | Honduras             | Both   | Age-standardized | 1.05 | 1.01 | 1.1  | 0 |
| 53 | Dominican Republic   | Both   | Age-standardized | 1.05 | 1.01 | 1.1  | 0 |
| 54 | Virgin Islands, U.S. | Male   | All Ages         | 2.06 | 1.97 | 2.14 | 0 |
| 55 | Virgin Islands, U.S. | Male   | 15-49 years      | 1.08 | 1    | 1.16 | 0 |
| 56 | Virgin Islands, U.S. | Male   | 50-69 years      | 0.91 | 0.86 | 0.96 | 0 |
| 57 | Virgin Islands, U.S. | Male   | 70+ years        | 0.65 | 0.62 | 0.67 | 0 |
| 58 | Virgin Islands, U.S. | Male   | Age-standardized | 0.89 | 0.84 | 0.95 | 0 |
| 59 | Virgin Islands, U.S. | Female | All Ages         | 2.01 | 1.89 | 2.13 | 0 |
| 60 | Virgin Islands, U.S. | Female | 15-49 years      | 0.87 | 0.74 | 1    | 0 |

|    |                          |        |                  |      |       |      |       |
|----|--------------------------|--------|------------------|------|-------|------|-------|
| 1  |                          |        |                  |      |       |      |       |
| 2  | Virgin Islands, U.S.     | Female | 50-69 years      | 0.77 | 0.68  | 0.86 | 0     |
| 3  | Virgin Islands, U.S.     | Female | 70+ years        | 0.54 | 0.47  | 0.61 | 0     |
| 4  | Virgin Islands, U.S.     | Female | Age-standardized | 0.69 | 0.59  | 0.8  | 0     |
| 5  | Virgin Islands, U.S.     | Both   | All Ages         | 2.03 | 1.93  | 2.12 | 0     |
| 6  | Virgin Islands, U.S.     | Both   | 15-49 years      | 0.99 | 0.9   | 1.08 | 0     |
| 7  | Virgin Islands, U.S.     | Both   | 50-69 years      | 0.83 | 0.76  | 0.9  | 0     |
| 8  | Virgin Islands, U.S.     | Both   | 70+ years        | 0.61 | 0.57  | 0.65 | 0     |
| 9  | Antigua and Barbuda      | Both   | Age-standardized | 1.05 | 0.99  | 1.11 | 0     |
| 10 | Mongolia                 | Male   | All Ages         | 1.78 | 1.7   | 1.86 | 0     |
| 11 | Mongolia                 | Male   | 15-49 years      | 1.06 | 0.96  | 1.17 | 0     |
| 12 | Mongolia                 | Male   | 50-69 years      | 0.11 | 0.06  | 0.16 | 0     |
| 13 | Mongolia                 | Male   | 70+ years        | 0.46 | 0.43  | 0.48 | 0     |
| 14 | Mongolia                 | Male   | Age-standardized | 0.46 | 0.41  | 0.51 | 0     |
| 15 | Mongolia                 | Female | All Ages         | 1.59 | 1.5   | 1.68 | 0     |
| 16 | Mongolia                 | Female | 15-49 years      | 0.7  | 0.59  | 0.81 | 0     |
| 17 | Mongolia                 | Female | 50-69 years      | 0.01 | -0.05 | 0.07 | 0.698 |
| 18 | Mongolia                 | Female | 70+ years        | 0.77 | 0.67  | 0.86 | 0     |
| 19 | Mongolia                 | Female | Age-standardized | 0.33 | 0.25  | 0.4  | 0     |
| 20 | Mongolia                 | Both   | All Ages         | 1.7  | 1.61  | 1.78 | 0     |
| 21 | Mongolia                 | Both   | 15-49 years      | 0.92 | 0.81  | 1.03 | 0     |
| 22 | Mongolia                 | Both   | 50-69 years      | 0.02 | -0.03 | 0.08 | 0.355 |
| 23 | Mongolia                 | Both   | 70+ years        | 0.63 | 0.57  | 0.69 | 0     |
| 24 | Mongolia                 | Both   | Age-standardized | 1.04 | 1.01  | 1.08 | 0     |
| 25 | Mauritania               | Both   | Age-standardized | 1.04 | 1.01  | 1.08 | 0     |
| 26 | Central African Republic | Male   | All Ages         | 0.85 | 0.76  | 0.94 | 0     |
| 27 | Central African Republic | Male   | 15-49 years      | 0.52 | 0.49  | 0.55 | 0     |
| 28 | Central African Republic | Male   | 50-69 years      | 0.39 | 0.36  | 0.42 | 0     |
| 29 | Central African Republic | Male   | 70+ years        | 0.42 | 0.39  | 0.45 | 0     |
| 30 | Central African Republic | Male   | Age-standardized | 0.43 | 0.4   | 0.46 | 0     |
| 31 | Central African Republic | Female | All Ages         | 0.73 | 0.58  | 0.88 | 0     |
| 32 | Central African Republic | Female | 15-49 years      | 0.48 | 0.41  | 0.55 | 0     |
| 33 | Central African Republic | Female | 50-69 years      | 0.47 | 0.4   | 0.54 | 0     |
| 34 | Central African Republic | Female | 70+ years        | 0.65 | 0.58  | 0.72 | 0     |
| 35 | Central African Republic | Female | Age-standardized | 0.53 | 0.46  | 0.6  | 0     |
| 36 | Central African Republic | Both   | All Ages         | 0.81 | 0.7   | 0.92 | 0     |
| 37 | Central African Republic | Both   | 15-49 years      | 0.52 | 0.49  | 0.56 | 0     |
| 38 | Central African Republic | Both   | 50-69 years      | 0.47 | 0.41  | 0.52 | 0     |
| 39 | Central African Republic | Both   | 70+ years        | 0.43 | 0.38  | 0.48 | 0     |
| 40 | Slovenia                 | Both   | Age-standardized | 1.04 | 1     | 1.09 | 0     |
| 41 | Guinea-Bissau            | Male   | All Ages         | 1.61 | 1.5   | 1.72 | 0     |
| 42 | Guinea-Bissau            | Male   | 15-49 years      | 1.38 | 1.29  | 1.47 | 0     |
| 43 | Guinea-Bissau            | Male   | 50-69 years      | 1.2  | 1.11  | 1.28 | 0     |
| 44 | Guinea-Bissau            | Male   | 70+ years        | 1.19 | 1.11  | 1.27 | 0     |
| 45 | Guinea-Bissau            | Male   | Age-standardized | 1.27 | 1.18  | 1.35 | 0     |
| 46 | Guinea-Bissau            | Female | All Ages         | 1.43 | 1.34  | 1.51 | 0     |
| 47 | Guinea-Bissau            | Female | 15-49 years      | 1.11 | 1.04  | 1.18 | 0     |
| 48 | Guinea-Bissau            | Female | 50-69 years      | 0.99 | 0.93  | 1.05 | 0     |
| 49 | Guinea-Bissau            | Female | 70+ years        | 1.14 | 1.08  | 1.21 | 0     |
| 50 | Guinea-Bissau            | Female | Age-standardized | 1.07 | 1     | 1.13 | 0     |
| 51 | Guinea-Bissau            | Both   | All Ages         | 1.54 | 1.44  | 1.64 | 0     |
| 52 | Guinea-Bissau            | Both   | 15-49 years      | 1.28 | 1.2   | 1.35 | 0     |
| 53 | Guinea-Bissau            | Both   | 50-69 years      | 1.12 | 1.04  | 1.2  | 0     |
| 54 | Guinea-Bissau            | Both   | 70+ years        | 0.97 | 0.9   | 1.05 | 0     |
| 55 | Austria                  | Both   | Age-standardized | 1.03 | 0.92  | 1.15 | 0     |
| 56 | Niger                    | Male   | All Ages         | 0.43 | 0.39  | 0.48 | 0     |
| 57 | Niger                    | Male   | 15-49 years      | 0.68 | 0.59  | 0.78 | 0     |
| 58 | Niger                    | Male   | 50-69 years      | 0.77 | 0.69  | 0.85 | 0     |

|    |                                  |        |                  |      |      |      |   |
|----|----------------------------------|--------|------------------|------|------|------|---|
| 1  |                                  |        |                  |      |      |      |   |
| 2  | Niger                            | Male   | 70+ years        | 0.75 | 0.69 | 0.82 | 0 |
| 3  | Niger                            | Male   | Age-standardized | 0.81 | 0.74 | 0.88 | 0 |
| 4  | Niger                            | Female | All Ages         | 0.51 | 0.46 | 0.55 | 0 |
| 5  | Niger                            | Female | 15-49 years      | 0.63 | 0.56 | 0.69 | 0 |
| 6  | Niger                            | Female | 50-69 years      | 0.61 | 0.56 | 0.65 | 0 |
| 7  | Niger                            | Female | 70+ years        | 0.75 | 0.72 | 0.79 | 0 |
| 8  | Niger                            | Female | Age-standardized | 0.67 | 0.63 | 0.7  | 0 |
| 9  | Niger                            | Both   | All Ages         | 0.46 | 0.42 | 0.5  | 0 |
| 10 | Niger                            | Both   | 15-49 years      | 0.67 | 0.58 | 0.75 | 0 |
| 11 | Niger                            | Both   | 50-69 years      | 0.63 | 0.56 | 0.71 | 0 |
| 12 | Niger                            | Both   | 70+ years        | 0.66 | 0.61 | 0.71 | 0 |
| 13 | Niger                            | Both   | Age-standardized | 1.03 | 0.89 | 1.18 | 0 |
| 14 | Belgium                          | Both   | All Ages         | 2.51 | 2.41 | 2.61 | 0 |
| 15 | Saint Vincent and the Grenadines | Male   | 15-49 years      | 1.6  | 1.47 | 1.73 | 0 |
| 16 | Saint Vincent and the Grenadines | Male   | 50-69 years      | 0.81 | 0.75 | 0.86 | 0 |
| 17 | Saint Vincent and the Grenadines | Male   | 70+ years        | 0.6  | 0.55 | 0.66 | 0 |
| 18 | Saint Vincent and the Grenadines | Male   | Age-standardized | 0.97 | 0.9  | 1.03 | 0 |
| 19 | Saint Vincent and the Grenadines | Female | All Ages         | 3.18 | 3.04 | 3.32 | 0 |
| 20 | Saint Vincent and the Grenadines | Female | 15-49 years      | 2.44 | 2.29 | 2.59 | 0 |
| 21 | Saint Vincent and the Grenadines | Female | 50-69 years      | 1.66 | 1.55 | 1.76 | 0 |
| 22 | Saint Vincent and the Grenadines | Female | 70+ years        | 1.57 | 1.45 | 1.69 | 0 |
| 23 | Saint Vincent and the Grenadines | Female | Age-standardized | 1.8  | 1.68 | 1.92 | 0 |
| 24 | Saint Vincent and the Grenadines | Both   | All Ages         | 2.8  | 2.69 | 2.91 | 0 |
| 25 | Saint Vincent and the Grenadines | Both   | 15-49 years      | 1.93 | 1.8  | 2.06 | 0 |
| 26 | Saint Vincent and the Grenadines | Both   | 50-69 years      | 1.24 | 1.17 | 1.31 | 0 |
| 27 | Saint Vincent and the Grenadines | Both   | 70+ years        | 1.16 | 1.07 | 1.24 | 0 |
| 28 | Paraguay                         | Both   | Age-standardized | 1.02 | 0.96 | 1.08 | 0 |
| 29 | Tanzania                         | Male   | All Ages         | 1.1  | 1.06 | 1.14 | 0 |
| 30 | Tanzania                         | Male   | 15-49 years      | 1.03 | 0.99 | 1.07 | 0 |
| 31 | Tanzania                         | Male   | 50-69 years      | 0.79 | 0.76 | 0.83 | 0 |
| 32 | Tanzania                         | Male   | 70+ years        | 0.81 | 0.76 | 0.86 | 0 |
| 33 | Tanzania                         | Male   | Age-standardized | 0.86 | 0.82 | 0.89 | 0 |
| 34 | Tanzania                         | Female | All Ages         | 0.68 | 0.63 | 0.72 | 0 |
| 35 | Tanzania                         | Female | 15-49 years      | 0.62 | 0.58 | 0.66 | 0 |
| 36 | Tanzania                         | Female | 50-69 years      | 0.37 | 0.33 | 0.4  | 0 |
| 37 | Tanzania                         | Female | 70+ years        | 0.51 | 0.45 | 0.56 | 0 |
| 38 | Tanzania                         | Female | Age-standardized | 0.45 | 0.42 | 0.49 | 0 |
| 39 | Tanzania                         | Both   | All Ages         | 0.93 | 0.9  | 0.97 | 0 |
| 40 | Tanzania                         | Both   | 15-49 years      | 0.88 | 0.84 | 0.91 | 0 |
| 41 | Tanzania                         | Both   | 50-69 years      | 0.65 | 0.61 | 0.69 | 0 |
| 42 | Tanzania                         | Both   | 70+ years        | 0.57 | 0.53 | 0.62 | 0 |
| 43 | Egypt                            | Both   | Age-standardized | 1.02 | 1.01 | 1.03 | 0 |
| 44 | Burkina Faso                     | Male   | All Ages         | 1.37 | 1.31 | 1.43 | 0 |
| 45 | Burkina Faso                     | Male   | 15-49 years      | 1.23 | 1.18 | 1.29 | 0 |
| 46 | Burkina Faso                     | Male   | 50-69 years      | 1.05 | 1    | 1.09 | 0 |
| 47 | Burkina Faso                     | Male   | 70+ years        | 1.05 | 1.02 | 1.09 | 0 |
| 48 | Burkina Faso                     | Male   | Age-standardized | 1.11 | 1.07 | 1.15 | 0 |
| 49 | Burkina Faso                     | Female | All Ages         | 0.95 | 0.9  | 1    | 0 |
| 50 | Burkina Faso                     | Female | 15-49 years      | 0.81 | 0.78 | 0.85 | 0 |
| 51 | Burkina Faso                     | Female | 50-69 years      | 0.67 | 0.64 | 0.71 | 0 |
| 52 | Burkina Faso                     | Female | 70+ years        | 0.81 | 0.78 | 0.83 | 0 |
| 53 | Burkina Faso                     | Female | Age-standardized | 0.77 | 0.74 | 0.8  | 0 |
| 54 | Burkina Faso                     | Both   | All Ages         | 1.22 | 1.17 | 1.27 | 0 |
| 55 | Burkina Faso                     | Both   | 15-49 years      | 1.12 | 1.07 | 1.16 | 0 |
| 56 | Burkina Faso                     | Both   | 50-69 years      | 0.86 | 0.83 | 0.89 | 0 |
| 57 | Burkina Faso                     | Both   | 70+ years        | 0.89 | 0.88 | 0.9  | 0 |



|    |                  |        |                  |      |      |      |   |
|----|------------------|--------|------------------|------|------|------|---|
| 1  |                  |        |                  |      |      |      |   |
| 2  | Togo             | Both   | Age-standardized | 1.02 | 0.97 | 1.07 | 0 |
| 3  | Bermuda          | Male   | All Ages         | 1.71 | 1.66 | 1.77 | 0 |
| 4  | Bermuda          | Male   | 15-49 years      | 1.25 | 1.15 | 1.34 | 0 |
| 5  | Bermuda          | Male   | 50-69 years      | 0.89 | 0.85 | 0.93 | 0 |
| 6  | Bermuda          | Male   | 70+ years        | 0.7  | 0.66 | 0.75 | 0 |
| 7  | Bermuda          | Male   | Age-standardized | 0.97 | 0.92 | 1.02 | 0 |
| 8  | Bermuda          | Female | All Ages         | 1.85 | 1.8  | 1.91 | 0 |
| 9  | Bermuda          | Female | 15-49 years      | 1.26 | 1.15 | 1.37 | 0 |
| 10 | Bermuda          | Female | 50-69 years      | 1.02 | 0.97 | 1.08 | 0 |
| 11 | Bermuda          | Female | 70+ years        | 0.85 | 0.77 | 0.93 | 0 |
| 12 | Bermuda          | Female | Age-standardized | 1.05 | 0.98 | 1.12 | 0 |
| 13 | Bermuda          | Both   | All Ages         | 1.77 | 1.72 | 1.82 | 0 |
| 14 | Bermuda          | Both   | 15-49 years      | 1.25 | 1.15 | 1.35 | 0 |
| 15 | Bermuda          | Both   | 50-69 years      | 0.95 | 0.9  | 1    | 0 |
| 16 | Bermuda          | Both   | 70+ years        | 0.81 | 0.74 | 0.88 | 0 |
| 17 | Cyprus           | Both   | Age-standardized | 1.02 | 0.85 | 1.18 | 0 |
| 18 | Marshall Islands | Male   | All Ages         | 2.16 | 2.12 | 2.21 | 0 |
| 19 | Marshall Islands | Male   | 15-49 years      | 1.12 | 1.07 | 1.17 | 0 |
| 20 | Marshall Islands | Male   | 50-69 years      | 0.72 | 0.7  | 0.74 | 0 |
| 21 | Marshall Islands | Male   | 70+ years        | 0.58 | 0.55 | 0.61 | 0 |
| 22 | Marshall Islands | Male   | Age-standardized | 0.78 | 0.76 | 0.8  | 0 |
| 23 | Marshall Islands | Female | All Ages         | 2.44 | 2.37 | 2.52 | 0 |
| 24 | Marshall Islands | Female | 15-49 years      | 1.43 | 1.33 | 1.53 | 0 |
| 25 | Marshall Islands | Female | 50-69 years      | 1.03 | 0.96 | 1.1  | 0 |
| 26 | Marshall Islands | Female | 70+ years        | 0.88 | 0.81 | 0.94 | 0 |
| 27 | Marshall Islands | Female | Age-standardized | 1.02 | 0.97 | 1.08 | 0 |
| 28 | Marshall Islands | Both   | All Ages         | 2.29 | 2.24 | 2.33 | 0 |
| 29 | Marshall Islands | Both   | 15-49 years      | 1.26 | 1.19 | 1.33 | 0 |
| 30 | Marshall Islands | Both   | 50-69 years      | 0.85 | 0.81 | 0.89 | 0 |
| 31 | Marshall Islands | Both   | 70+ years        | 0.74 | 0.7  | 0.79 | 0 |
| 32 | Papua New Guinea | Both   | Age-standardized | 1.02 | 0.99 | 1.06 | 0 |
| 33 | High-middle SDI  | Male   | All Ages         | 2.05 | 2.04 | 2.07 | 0 |
| 34 | High-middle SDI  | Male   | 15-49 years      | 1.5  | 1.41 | 1.58 | 0 |
| 35 | High-middle SDI  | Male   | 50-69 years      | 0.86 | 0.8  | 0.93 | 0 |
| 36 | High-middle SDI  | Male   | 70+ years        | 0.68 | 0.65 | 0.7  | 0 |
| 37 | High-middle SDI  | Male   | Age-standardized | 1.05 | 1    | 1.1  | 0 |
| 38 | High-middle SDI  | Female | All Ages         | 2.36 | 2.35 | 2.37 | 0 |
| 39 | High-middle SDI  | Female | 15-49 years      | 1.71 | 1.63 | 1.78 | 0 |
| 40 | High-middle SDI  | Female | 50-69 years      | 1.38 | 1.34 | 1.42 | 0 |
| 41 | High-middle SDI  | Female | 70+ years        | 1.23 | 1.21 | 1.24 | 0 |
| 42 | High-middle SDI  | Female | Age-standardized | 1.37 | 1.35 | 1.4  | 0 |
| 43 | High-middle SDI  | Both   | All Ages         | 2.18 | 2.17 | 2.2  | 0 |
| 44 | High-middle SDI  | Both   | 15-49 years      | 1.59 | 1.51 | 1.67 | 0 |
| 45 | High-middle SDI  | Both   | 50-69 years      | 1.09 | 1.04 | 1.14 | 0 |
| 46 | High-middle SDI  | Both   | 70+ years        | 1.03 | 1.02 | 1.03 | 0 |
| 47 | High-middle SDI  | Both   | Age-standardized | 1.21 | 1.17 | 1.25 | 0 |
| 48 | Japan            | Male   | All Ages         | 1.21 | 1.14 | 1.29 | 0 |
| 49 | Japan            | Male   | 15-49 years      | 0.74 | 0.71 | 0.77 | 0 |
| 50 | Japan            | Male   | 50-69 years      | 0.61 | 0.59 | 0.62 | 0 |
| 51 | Japan            | Male   | 70+ years        | 0.25 | 0.22 | 0.29 | 0 |
| 52 | Japan            | Male   | Age-standardized | 0.5  | 0.47 | 0.53 | 0 |
| 53 | Japan            | Female | All Ages         | 1.8  | 1.69 | 1.91 | 0 |
| 54 | Japan            | Female | 15-49 years      | 1.05 | 1.01 | 1.09 | 0 |
| 55 | Japan            | Female | 50-69 years      | 0.96 | 0.9  | 1.02 | 0 |
| 56 | Japan            | Female | 70+ years        | 0.68 | 0.61 | 0.75 | 0 |
| 57 | Japan            | Female | Age-standardized | 0.84 | 0.79 | 0.9  | 0 |



|    |                 |        |                  |      |      |      |   |
|----|-----------------|--------|------------------|------|------|------|---|
| 1  |                 |        |                  |      |      |      |   |
| 2  | Japan           | Both   | All Ages         | 1.39 | 1.3  | 1.47 | 0 |
| 3  | Japan           | Both   | 15-49 years      | 0.83 | 0.79 | 0.86 | 0 |
| 4  | Japan           | Both   | 50-69 years      | 0.75 | 0.73 | 0.78 | 0 |
| 5  | Japan           | Both   | 70+ years        | 0.54 | 0.49 | 0.59 | 0 |
| 6  | Singapore       | Both   | Age-standardized | 1.02 | 0.92 | 1.12 | 0 |
| 7  | Switzerland     | Male   | All Ages         | 1.38 | 1.29 | 1.47 | 0 |
| 8  | Switzerland     | Male   | 15-49 years      | 1.13 | 1.02 | 1.24 | 0 |
| 9  | Switzerland     | Male   | 50-69 years      | 1.02 | 0.93 | 1.11 | 0 |
| 10 | Switzerland     | Male   | 70+ years        | 0.76 | 0.69 | 0.83 | 0 |
| 11 | Switzerland     | Male   | Age-standardized | 1.03 | 0.94 | 1.12 | 0 |
| 12 | Switzerland     | Female | All Ages         | 1.41 | 1.33 | 1.49 | 0 |
| 13 | Switzerland     | Female | 15-49 years      | 1.21 | 1.12 | 1.3  | 0 |
| 14 | Switzerland     | Female | 50-69 years      | 1.12 | 1.04 | 1.21 | 0 |
| 15 | Switzerland     | Female | 70+ years        | 0.98 | 0.9  | 1.06 | 0 |
| 16 | Switzerland     | Female | Age-standardized | 1.12 | 1.04 | 1.21 | 0 |
| 17 | Switzerland     | Both   | All Ages         | 1.4  | 1.32 | 1.48 | 0 |
| 18 | Switzerland     | Both   | 15-49 years      | 1.13 | 1.04 | 1.22 | 0 |
| 19 | Switzerland     | Both   | 50-69 years      | 1.12 | 1.03 | 1.21 | 0 |
| 20 | Switzerland     | Both   | 70+ years        | 1    | 0.94 | 1.06 | 0 |
| 21 | Switzerland     | Both   | Age-standardized | 1.01 | 0.91 | 1.1  | 0 |
| 22 | Dominica        | Both   | Age-standardized | 1.01 | 0.91 | 1.1  | 0 |
| 23 | Qatar           | Male   | All Ages         | 1.75 | 1.68 | 1.81 | 0 |
| 24 | Qatar           | Male   | 15-49 years      | 1.05 | 1.01 | 1.1  | 0 |
| 25 | Qatar           | Male   | 50-69 years      | 0.94 | 0.92 | 0.97 | 0 |
| 26 | Qatar           | Male   | 70+ years        | 0.72 | 0.71 | 0.74 | 0 |
| 27 | Qatar           | Male   | Age-standardized | 0.99 | 0.97 | 1.01 | 0 |
| 28 | Qatar           | Female | All Ages         | 2.04 | 1.98 | 2.09 | 0 |
| 29 | Qatar           | Female | 15-49 years      | 1.15 | 1.1  | 1.19 | 0 |
| 30 | Qatar           | Female | 50-69 years      | 0.95 | 0.92 | 0.98 | 0 |
| 31 | Qatar           | Female | 70+ years        | 0.85 | 0.82 | 0.89 | 0 |
| 32 | Qatar           | Female | Age-standardized | 0.94 | 0.91 | 0.98 | 0 |
| 33 | Qatar           | Both   | All Ages         | 2.06 | 1.96 | 2.16 | 0 |
| 34 | Qatar           | Both   | 15-49 years      | 1.22 | 1.2  | 1.24 | 0 |
| 35 | Qatar           | Both   | 50-69 years      | 1.01 | 0.99 | 1.04 | 0 |
| 36 | Qatar           | Both   | 70+ years        | 0.83 | 0.8  | 0.87 | 0 |
| 37 | Qatar           | Both   | Age-standardized | 1.01 | 0.95 | 1.07 | 0 |
| 38 | Bermuda         | Both   | Age-standardized | 1.01 | 0.95 | 1.07 | 0 |
| 39 | Haiti           | Male   | All Ages         | 1.6  | 1.55 | 1.65 | 0 |
| 40 | Haiti           | Male   | 15-49 years      | 1.17 | 1.13 | 1.21 | 0 |
| 41 | Haiti           | Male   | 50-69 years      | 1.04 | 0.99 | 1.09 | 0 |
| 42 | Haiti           | Male   | 70+ years        | 0.91 | 0.85 | 0.98 | 0 |
| 43 | Haiti           | Male   | Age-standardized | 1.07 | 1.03 | 1.11 | 0 |
| 44 | Haiti           | Female | All Ages         | 2.04 | 1.98 | 2.1  | 0 |
| 45 | Haiti           | Female | 15-49 years      | 1.51 | 1.47 | 1.56 | 0 |
| 46 | Haiti           | Female | 50-69 years      | 1.21 | 1.16 | 1.27 | 0 |
| 47 | Haiti           | Female | 70+ years        | 1.22 | 1.15 | 1.29 | 0 |
| 48 | Haiti           | Female | Age-standardized | 1.3  | 1.25 | 1.36 | 0 |
| 49 | Haiti           | Both   | All Ages         | 1.79 | 1.73 | 1.84 | 0 |
| 50 | Haiti           | Both   | 15-49 years      | 1.31 | 1.27 | 1.35 | 0 |
| 51 | Haiti           | Both   | 50-69 years      | 1.08 | 1.03 | 1.13 | 0 |
| 52 | Haiti           | Both   | 70+ years        | 1.03 | 0.95 | 1.1  | 0 |
| 53 | Haiti           | Both   | Age-standardized | 1    | 0.93 | 1.07 | 0 |
| 54 | Solomon Islands | Both   | Age-standardized | 1    | 0.93 | 1.07 | 0 |
| 55 | Peru            | Male   | All Ages         | 2.4  | 2.34 | 2.45 | 0 |
| 56 | Peru            | Male   | 15-49 years      | 1.73 | 1.68 | 1.79 | 0 |
| 57 | Peru            | Male   | 50-69 years      | 1.28 | 1.23 | 1.33 | 0 |
| 58 | Peru            | Male   | 70+ years        | 1.03 | 0.97 | 1.08 | 0 |
| 59 | Peru            | Male   | Age-standardized | 1.35 | 1.29 | 1.4  | 0 |
| 60 | Peru            | Female | All Ages         | 2.26 | 2.2  | 2.33 | 0 |

|    |             |        |                  |       |       |       |       |
|----|-------------|--------|------------------|-------|-------|-------|-------|
| 1  |             |        |                  |       |       |       |       |
| 2  | Peru        | Female | 15-49 years      | 1.44  | 1.42  | 1.47  | 0     |
| 3  | Peru        | Female | 50-69 years      | 1.04  | 1     | 1.09  | 0     |
| 4  | Peru        | Female | 70+ years        | 1.1   | 1.04  | 1.17  | 0     |
| 5  | Peru        | Female | Age-standardized | 1.13  | 1.09  | 1.16  | 0     |
| 6  | Peru        | Both   | All Ages         | 2.36  | 2.31  | 2.42  | 0     |
| 7  | Peru        | Both   | 15-49 years      | 1.66  | 1.62  | 1.7   | 0     |
| 8  | Peru        | Both   | 50-69 years      | 1.18  | 1.14  | 1.23  | 0     |
| 9  | Peru        | Both   | 70+ years        | 1.08  | 1.04  | 1.12  | 0     |
| 10 | Vietnam     | Both   | Age-standardized | 1     | 0.96  | 1.04  | 0     |
| 11 | South Sudan | Male   | All Ages         | 0.14  | 0.06  | 0.21  | 0.001 |
| 12 | South Sudan | Male   | 15-49 years      | 0.61  | 0.6   | 0.63  | 0     |
| 13 | South Sudan | Male   | 50-69 years      | 0.49  | 0.45  | 0.53  | 0     |
| 14 | South Sudan | Male   | 70+ years        | 0.53  | 0.49  | 0.56  | 0     |
| 15 | South Sudan | Male   | Age-standardized | 0.55  | 0.51  | 0.59  | 0     |
| 16 | South Sudan | Female | All Ages         | 0.17  | 0.1   | 0.24  | 0     |
| 17 | South Sudan | Female | 15-49 years      | 0.33  | 0.3   | 0.37  | 0     |
| 18 | South Sudan | Female | 50-69 years      | 0.1   | 0.07  | 0.14  | 0     |
| 19 | South Sudan | Female | 70+ years        | 0.25  | 0.21  | 0.29  | 0     |
| 20 | South Sudan | Female | Age-standardized | 0.18  | 0.15  | 0.2   | 0     |
| 21 | South Sudan | Both   | All Ages         | 0.11  | 0.04  | 0.19  | 0.003 |
| 22 | South Sudan | Both   | 15-49 years      | 0.44  | 0.41  | 0.46  | 0     |
| 23 | South Sudan | Both   | 50-69 years      | 0.27  | 0.23  | 0.31  | 0     |
| 24 | South Sudan | Both   | 70+ years        | 0.48  | 0.47  | 0.48  | 0     |
| 25 | Turkey      | Both   | Age-standardized | 1     | 0.94  | 1.07  | 0     |
| 26 | Luxembourg  | Male   | All Ages         | 1.28  | 1.2   | 1.35  | 0     |
| 27 | Luxembourg  | Male   | 15-49 years      | 1.16  | 1.03  | 1.3   | 0     |
| 28 | Luxembourg  | Male   | 50-69 years      | 1.03  | 0.92  | 1.14  | 0     |
| 29 | Luxembourg  | Male   | 70+ years        | 0.8   | 0.7   | 0.9   | 0     |
| 30 | Luxembourg  | Male   | Age-standardized | 1.07  | 0.96  | 1.17  | 0     |
| 31 | Luxembourg  | Female | All Ages         | 1.41  | 1.31  | 1.51  | 0     |
| 32 | Luxembourg  | Female | 15-49 years      | 1.38  | 1.23  | 1.53  | 0     |
| 33 | Luxembourg  | Female | 50-69 years      | 1.27  | 1.15  | 1.39  | 0     |
| 34 | Luxembourg  | Female | 70+ years        | 1.26  | 1.14  | 1.39  | 0     |
| 35 | Luxembourg  | Female | Age-standardized | 1.32  | 1.21  | 1.44  | 0     |
| 36 | Luxembourg  | Both   | All Ages         | 1.35  | 1.27  | 1.43  | 0     |
| 37 | Luxembourg  | Both   | 15-49 years      | 1.22  | 1.09  | 1.35  | 0     |
| 38 | Luxembourg  | Both   | 50-69 years      | 1.19  | 1.07  | 1.31  | 0     |
| 39 | Luxembourg  | Both   | 70+ years        | 1.2   | 1.09  | 1.3   | 0     |
| 40 | Belize      | Both   | Age-standardized | 1     | 0.9   | 1.11  | 0     |
| 41 | Burundi     | Male   | All Ages         | 0.68  | 0.64  | 0.72  | 0     |
| 42 | Burundi     | Male   | 15-49 years      | 0.33  | 0.26  | 0.4   | 0     |
| 43 | Burundi     | Male   | 50-69 years      | 0.3   | 0.27  | 0.33  | 0     |
| 44 | Burundi     | Male   | 70+ years        | 0.37  | 0.35  | 0.4   | 0     |
| 45 | Burundi     | Male   | Age-standardized | 0.36  | 0.35  | 0.38  | 0     |
| 46 | Burundi     | Female | All Ages         | -0.09 | -0.19 | 0.02  | 0.094 |
| 47 | Burundi     | Female | 15-49 years      | -0.15 | -0.26 | -0.04 | 0.011 |
| 48 | Burundi     | Female | 50-69 years      | -0.05 | -0.11 | 0.01  | 0.127 |
| 49 | Burundi     | Female | 70+ years        | 0.13  | 0.08  | 0.18  | 0     |
| 50 | Burundi     | Female | Age-standardized | 0.05  | 0.01  | 0.1   | 0.023 |
| 51 | Burundi     | Both   | All Ages         | 0.41  | 0.34  | 0.47  | 0     |
| 52 | Burundi     | Both   | 15-49 years      | 0.18  | 0.09  | 0.26  | 0     |
| 53 | Burundi     | Both   | 50-69 years      | 0.32  | 0.29  | 0.35  | 0     |
| 54 | Burundi     | Both   | 70+ years        | 0.38  | 0.33  | 0.42  | 0     |
| 55 | Estonia     | Both   | Age-standardized | 0.99  | 0.88  | 1.11  | 0     |
| 56 | New Zealand | Male   | All Ages         | 1.65  | 1.52  | 1.78  | 0     |
| 57 | New Zealand | Male   | 15-49 years      | 1.33  | 1.16  | 1.5   | 0     |

|    |              |        |                  |       |       |       |       |
|----|--------------|--------|------------------|-------|-------|-------|-------|
| 1  |              |        |                  |       |       |       |       |
| 2  | New Zealand  | Male   | 50-69 years      | 1.17  | 1.05  | 1.29  | 0     |
| 3  | New Zealand  | Male   | 70+ years        | 0.84  | 0.72  | 0.95  | 0     |
| 4  | New Zealand  | Male   | Age-standardized | 1.21  | 1.08  | 1.34  | 0     |
| 5  | New Zealand  | Female | All Ages         | 1.64  | 1.56  | 1.72  | 0     |
| 6  | New Zealand  | Female | 15-49 years      | 1.3   | 1.17  | 1.43  | 0     |
| 7  | New Zealand  | Female | 50-69 years      | 1.15  | 1.06  | 1.23  | 0     |
| 8  | New Zealand  | Female | 70+ years        | 0.99  | 0.89  | 1.08  | 0     |
| 9  | New Zealand  | Female | Age-standardized | 1.17  | 1.07  | 1.27  | 0     |
| 10 | New Zealand  | Both   | All Ages         | 1.63  | 1.52  | 1.74  | 0     |
| 11 | New Zealand  | Both   | 15-49 years      | 1.28  | 1.13  | 1.43  | 0     |
| 12 | New Zealand  | Both   | 50-69 years      | 1.12  | 1.01  | 1.23  | 0     |
| 13 | New Zealand  | Both   | 70+ years        | 1.05  | 0.94  | 1.16  | 0     |
| 14 | New Zealand  | Both   | Age-standardized | 0.99  | 0.95  | 1.03  | 0     |
| 15 | Namibia      | Both   | All Ages         | 1.01  | 0.94  | 1.08  | 0     |
| 16 | Slovakia     | Male   | 15-49 years      | 0.52  | 0.4   | 0.64  | 0     |
| 17 | Slovakia     | Male   | 50-69 years      | -0.22 | -0.37 | -0.07 | 0.005 |
| 18 | Slovakia     | Male   | 70+ years        | 0.04  | -0.03 | 0.12  | 0.248 |
| 19 | Slovakia     | Male   | Age-standardized | 0.13  | 0.05  | 0.2   | 0.002 |
| 20 | Slovakia     | Female | All Ages         | 1.44  | 1.37  | 1.52  | 0     |
| 21 | Slovakia     | Female | 15-49 years      | 0.68  | 0.58  | 0.79  | 0     |
| 22 | Slovakia     | Female | 50-69 years      | 0.46  | 0.3   | 0.62  | 0     |
| 23 | Slovakia     | Female | 70+ years        | 0.59  | 0.52  | 0.66  | 0     |
| 24 | Slovakia     | Female | Age-standardized | 0.53  | 0.45  | 0.6   | 0     |
| 25 | Slovakia     | Both   | All Ages         | 1.16  | 1.08  | 1.24  | 0     |
| 26 | Slovakia     | Both   | 15-49 years      | 0.59  | 0.47  | 0.71  | 0     |
| 27 | Slovakia     | Both   | 50-69 years      | 0.1   | -0.05 | 0.25  | 0.17  |
| 28 | Slovakia     | Both   | 70+ years        | 0.23  | 0.15  | 0.31  | 0     |
| 29 | Slovakia     | Both   | Age-standardized | 0.99  | 0.97  | 1.01  | 0     |
| 30 | Burkina Faso | Both   | All Ages         | 1.71  | 1.66  | 1.76  | 0     |
| 31 | Kenya        | Male   | 15-49 years      | 1.27  | 1.24  | 1.31  | 0     |
| 32 | Kenya        | Male   | 50-69 years      | 0.97  | 0.91  | 1.02  | 0     |
| 33 | Kenya        | Male   | 70+ years        | 1.03  | 0.97  | 1.09  | 0     |
| 34 | Kenya        | Male   | Age-standardized | 1.05  | 1.02  | 1.08  | 0     |
| 35 | Kenya        | Female | All Ages         | 0.94  | 0.88  | 1.01  | 0     |
| 36 | Kenya        | Female | 15-49 years      | 0.48  | 0.43  | 0.54  | 0     |
| 37 | Kenya        | Female | 50-69 years      | 0.1   | 0.05  | 0.16  | 0.001 |
| 38 | Kenya        | Female | 70+ years        | 0.24  | 0.18  | 0.3   | 0     |
| 39 | Kenya        | Female | Age-standardized | 0.22  | 0.18  | 0.27  | 0     |
| 40 | Kenya        | Both   | All Ages         | 1.44  | 1.38  | 1.5   | 0     |
| 41 | Kenya        | Both   | 15-49 years      | 1     | 0.96  | 1.04  | 0     |
| 42 | Kenya        | Both   | 50-69 years      | 0.67  | 0.62  | 0.73  | 0     |
| 43 | Kenya        | Both   | 70+ years        | 0.49  | 0.42  | 0.57  | 0     |
| 44 | Kenya        | Both   | Age-standardized | 0.97  | 0.96  | 0.99  | 0     |
| 45 | Argentina    | Both   | All Ages         | 1.58  | 1.52  | 1.64  | 0     |
| 46 | Fiji         | Male   | 15-49 years      | 0.89  | 0.78  | 1     | 0     |
| 47 | Fiji         | Male   | 50-69 years      | 0.59  | 0.49  | 0.69  | 0     |
| 48 | Fiji         | Male   | 70+ years        | 0.49  | 0.39  | 0.59  | 0     |
| 49 | Fiji         | Male   | Age-standardized | 0.62  | 0.51  | 0.73  | 0     |
| 50 | Fiji         | Female | All Ages         | 1.95  | 1.93  | 1.98  | 0     |
| 51 | Fiji         | Female | 15-49 years      | 1.2   | 1.16  | 1.23  | 0     |
| 52 | Fiji         | Female | 50-69 years      | 1.03  | 0.99  | 1.07  | 0     |
| 53 | Fiji         | Female | 70+ years        | 0.88  | 0.85  | 0.9   | 0     |
| 54 | Fiji         | Female | Age-standardized | 0.98  | 0.94  | 1.01  | 0     |
| 55 | Fiji         | Both   | All Ages         | 1.75  | 1.72  | 1.78  | 0     |
| 56 | Fiji         | Both   | 15-49 years      | 1.03  | 0.96  | 1.1   | 0     |
| 57 | Fiji         | Both   | 50-69 years      | 0.8   | 0.73  | 0.87  | 0     |
| 58 | Fiji         | Both   | Age-standardized | 0.98  | 0.94  | 1.01  | 0     |
| 59 | Fiji         | Both   | All Ages         | 1.75  | 1.72  | 1.78  | 0     |
| 60 | Fiji         | Both   | 15-49 years      | 1.03  | 0.96  | 1.1   | 0     |
| 61 | Fiji         | Both   | 50-69 years      | 0.8   | 0.73  | 0.87  | 0     |

|    |                        |        |                  |      |      |      |   |
|----|------------------------|--------|------------------|------|------|------|---|
| 1  |                        |        |                  |      |      |      |   |
| 2  | Fiji                   | Both   | 70+ years        | 0.65 | 0.59 | 0.71 | 0 |
| 3  | Kuwait                 | Both   | Age-standardized | 0.96 | 0.92 | 0.99 | 0 |
| 4  | Bosnia and Herzegovina | Male   | All Ages         | 2.12 | 1.94 | 2.29 | 0 |
| 5  | Bosnia and Herzegovina | Male   | 15-49 years      | 1.34 | 1.23 | 1.45 | 0 |
| 6  | Bosnia and Herzegovina | Male   | 50-69 years      | 0.79 | 0.57 | 1.01 | 0 |
| 7  | Bosnia and Herzegovina | Male   | 70+ years        | 1.17 | 0.93 | 1.41 | 0 |
| 8  | Bosnia and Herzegovina | Male   | Age-standardized | 1.04 | 0.91 | 1.17 | 0 |
| 9  | Bosnia and Herzegovina | Female | All Ages         | 2.47 | 2.33 | 2.62 | 0 |
| 10 | Bosnia and Herzegovina | Female | 15-49 years      | 1.57 | 1.45 | 1.7  | 0 |
| 11 | Bosnia and Herzegovina | Female | 50-69 years      | 1.4  | 1.24 | 1.56 | 0 |
| 12 | Bosnia and Herzegovina | Female | 70+ years        | 1.66 | 1.48 | 1.83 | 0 |
| 13 | Bosnia and Herzegovina | Female | Age-standardized | 1.45 | 1.32 | 1.58 | 0 |
| 14 | Bosnia and Herzegovina | Both   | All Ages         | 2.27 | 2.11 | 2.43 | 0 |
| 15 | Bosnia and Herzegovina | Both   | 15-49 years      | 1.43 | 1.32 | 1.54 | 0 |
| 16 | Bosnia and Herzegovina | Both   | 50-69 years      | 1.08 | 0.89 | 1.27 | 0 |
| 17 | Bosnia and Herzegovina | Both   | 70+ years        | 1.5  | 1.28 | 1.72 | 0 |
| 18 | Laos                   | Both   | Age-standardized | 0.95 | 0.89 | 1.01 | 0 |
| 19 | Sweden                 | Male   | All Ages         | 1.24 | 1.14 | 1.35 | 0 |
| 20 | Sweden                 | Male   | 15-49 years      | 1.1  | 0.98 | 1.21 | 0 |
| 21 | Sweden                 | Male   | 50-69 years      | 1.08 | 0.99 | 1.17 | 0 |
| 22 | Sweden                 | Male   | 70+ years        | 0.77 | 0.7  | 0.84 | 0 |
| 23 | Sweden                 | Male   | Age-standardized | 1.08 | 0.98 | 1.19 | 0 |
| 24 | Sweden                 | Female | All Ages         | 1.4  | 1.29 | 1.52 | 0 |
| 25 | Sweden                 | Female | 15-49 years      | 1.32 | 1.21 | 1.44 | 0 |
| 26 | Sweden                 | Female | 50-69 years      | 1.32 | 1.23 | 1.42 | 0 |
| 27 | Sweden                 | Female | 70+ years        | 1.14 | 1.04 | 1.23 | 0 |
| 28 | Sweden                 | Female | Age-standardized | 1.32 | 1.21 | 1.43 | 0 |
| 29 | Sweden                 | Both   | All Ages         | 1.32 | 1.21 | 1.42 | 0 |
| 30 | Sweden                 | Both   | 15-49 years      | 1.17 | 1.05 | 1.28 | 0 |
| 31 | Sweden                 | Both   | 50-69 years      | 1.19 | 1.1  | 1.29 | 0 |
| 32 | Sweden                 | Both   | 70+ years        | 1.02 | 0.96 | 1.09 | 0 |
| 33 | Pakistan               | Both   | Age-standardized | 0.94 | 0.91 | 0.97 | 0 |
| 34 | Antigua and Barbuda    | Male   | All Ages         | 1.89 | 1.81 | 1.97 | 0 |
| 35 | Antigua and Barbuda    | Male   | 15-49 years      | 1.39 | 1.33 | 1.46 | 0 |
| 36 | Antigua and Barbuda    | Male   | 50-69 years      | 0.93 | 0.89 | 0.97 | 0 |
| 37 | Antigua and Barbuda    | Male   | 70+ years        | 0.68 | 0.65 | 0.71 | 0 |
| 38 | Antigua and Barbuda    | Male   | Age-standardized | 1.02 | 0.98 | 1.06 | 0 |
| 39 | Antigua and Barbuda    | Female | All Ages         | 1.89 | 1.76 | 2.01 | 0 |
| 40 | Antigua and Barbuda    | Female | 15-49 years      | 1.44 | 1.38 | 1.5  | 0 |
| 41 | Antigua and Barbuda    | Female | 50-69 years      | 0.94 | 0.86 | 1.03 | 0 |
| 42 | Antigua and Barbuda    | Female | 70+ years        | 0.91 | 0.84 | 0.97 | 0 |
| 43 | Antigua and Barbuda    | Female | Age-standardized | 1.05 | 0.98 | 1.12 | 0 |
| 44 | Antigua and Barbuda    | Both   | All Ages         | 1.9  | 1.79 | 2.01 | 0 |
| 45 | Antigua and Barbuda    | Both   | 15-49 years      | 1.42 | 1.37 | 1.47 | 0 |
| 46 | Antigua and Barbuda    | Both   | 50-69 years      | 0.96 | 0.9  | 1.02 | 0 |
| 47 | Antigua and Barbuda    | Both   | 70+ years        | 0.83 | 0.78 | 0.87 | 0 |
| 48 | Armenia                | Both   | Age-standardized | 0.93 | 0.86 | 1.01 | 0 |
| 49 | Low SDI                | Male   | All Ages         | 1.18 | 1.09 | 1.27 | 0 |
| 50 | Low SDI                | Male   | 15-49 years      | 0.9  | 0.87 | 0.94 | 0 |
| 51 | Low SDI                | Male   | 50-69 years      | 0.73 | 0.68 | 0.77 | 0 |
| 52 | Low SDI                | Male   | 70+ years        | 0.74 | 0.69 | 0.79 | 0 |
| 53 | Low SDI                | Male   | Age-standardized | 0.82 | 0.78 | 0.86 | 0 |
| 54 | Low SDI                | Female | All Ages         | 1.13 | 1.03 | 1.23 | 0 |
| 55 | Low SDI                | Female | 15-49 years      | 0.78 | 0.72 | 0.84 | 0 |
| 56 | Low SDI                | Female | 50-69 years      | 0.61 | 0.56 | 0.67 | 0 |
| 57 | Low SDI                | Female | 70+ years        | 0.72 | 0.67 | 0.78 | 0 |

|    |           |        |                  |      |      |      |       |
|----|-----------|--------|------------------|------|------|------|-------|
| 1  |           |        |                  |      |      |      |       |
| 2  | Low SDI   | Female | Age-standardized | 0.69 | 0.64 | 0.75 | 0     |
| 3  | Low SDI   | Both   | All Ages         | 1.15 | 1.06 | 1.24 | 0     |
| 4  | Low SDI   | Both   | 15-49 years      | 0.85 | 0.8  | 0.89 | 0     |
| 5  | Low SDI   | Both   | 50-69 years      | 0.64 | 0.59 | 0.69 | 0     |
| 6  | Low SDI   | Both   | 70+ years        | 0.66 | 0.62 | 0.7  | 0     |
| 7  | Low SDI   | Both   | Age-standardized | 0.74 | 0.7  | 0.79 | 0     |
| 8  | Zambia    | Male   | All Ages         | 0.84 | 0.74 | 0.95 | 0     |
| 9  | Zambia    | Male   | 15-49 years      | 0.85 | 0.82 | 0.88 | 0     |
| 10 | Zambia    | Male   | 50-69 years      | 0.56 | 0.53 | 0.59 | 0     |
| 11 | Zambia    | Male   | 70+ years        | 0.59 | 0.55 | 0.63 | 0     |
| 12 | Zambia    | Male   | Age-standardized | 0.63 | 0.6  | 0.65 | 0     |
| 13 | Zambia    | Female | All Ages         | 0.37 | 0.26 | 0.49 | 0     |
| 14 | Zambia    | Female | 15-49 years      | 0.26 | 0.21 | 0.32 | 0     |
| 15 | Zambia    | Female | 50-69 years      | 0.05 | 0.01 | 0.1  | 0.027 |
| 16 | Zambia    | Female | 70+ years        | 0.18 | 0.14 | 0.22 | 0     |
| 17 | Zambia    | Female | Age-standardized | 0.12 | 0.07 | 0.16 | 0     |
| 18 | Zambia    | Both   | All Ages         | 0.66 | 0.55 | 0.77 | 0     |
| 19 | Zambia    | Both   | 15-49 years      | 0.63 | 0.59 | 0.67 | 0     |
| 20 | Zambia    | Both   | 50-69 years      | 0.32 | 0.28 | 0.37 | 0     |
| 21 | Zambia    | Both   | 70+ years        | 0.2  | 0.18 | 0.23 | 0     |
| 22 | Zambia    | Both   | Age-standardized | 0.93 | 0.91 | 0.95 | 0     |
| 23 | Vanuatu   | Both   | All Ages         | 1.25 | 1.13 | 1.38 | 0     |
| 24 | Denmark   | Male   | 15-49 years      | 1.13 | 0.92 | 1.34 | 0     |
| 25 | Denmark   | Male   | 50-69 years      | 1.08 | 0.94 | 1.21 | 0     |
| 26 | Denmark   | Male   | 70+ years        | 0.82 | 0.71 | 0.93 | 0     |
| 27 | Denmark   | Male   | Age-standardized | 1.08 | 0.93 | 1.23 | 0     |
| 28 | Denmark   | Female | All Ages         | 1.33 | 1.19 | 1.46 | 0     |
| 29 | Denmark   | Female | 15-49 years      | 1.26 | 1.04 | 1.47 | 0     |
| 30 | Denmark   | Female | 50-69 years      | 1.25 | 1.1  | 1.4  | 0     |
| 31 | Denmark   | Female | 70+ years        | 1.03 | 0.89 | 1.16 | 0     |
| 32 | Denmark   | Female | Age-standardized | 1.22 | 1.06 | 1.38 | 0     |
| 33 | Denmark   | Both   | All Ages         | 1.29 | 1.16 | 1.42 | 0     |
| 34 | Denmark   | Both   | 15-49 years      | 1.14 | 0.93 | 1.35 | 0     |
| 35 | Denmark   | Both   | 50-69 years      | 1.17 | 1.02 | 1.32 | 0     |
| 36 | Denmark   | Both   | 70+ years        | 1.07 | 0.98 | 1.17 | 0     |
| 37 | Denmark   | Both   | Age-standardized | 0.92 | 0.82 | 1.03 | 0     |
| 38 | Palestine | Both   | All Ages         | 2.17 | 2.06 | 2.28 | 0     |
| 39 | Jamaica   | Male   | 15-49 years      | 1.48 | 1.33 | 1.63 | 0     |
| 40 | Jamaica   | Male   | 50-69 years      | 1.07 | 0.97 | 1.17 | 0     |
| 41 | Jamaica   | Male   | 70+ years        | 0.83 | 0.74 | 0.93 | 0     |
| 42 | Jamaica   | Male   | Age-standardized | 1.15 | 1.04 | 1.27 | 0     |
| 43 | Jamaica   | Female | All Ages         | 2.12 | 2.01 | 2.23 | 0     |
| 44 | Jamaica   | Female | 15-49 years      | 1.49 | 1.33 | 1.64 | 0     |
| 45 | Jamaica   | Female | 50-69 years      | 1.07 | 0.95 | 1.18 | 0     |
| 46 | Jamaica   | Female | 70+ years        | 0.97 | 0.85 | 1.09 | 0     |
| 47 | Jamaica   | Female | Age-standardized | 1.15 | 1.03 | 1.28 | 0     |
| 48 | Jamaica   | Both   | All Ages         | 2.16 | 2.04 | 2.27 | 0     |
| 49 | Jamaica   | Both   | 15-49 years      | 1.5  | 1.35 | 1.65 | 0     |
| 50 | Jamaica   | Both   | 50-69 years      | 1.09 | 0.98 | 1.2  | 0     |
| 51 | Jamaica   | Both   | 70+ years        | 0.92 | 0.8  | 1.03 | 0     |
| 52 | Jamaica   | Both   | Age-standardized | 0.91 | 0.87 | 0.96 | 0     |
| 53 | Samoa     | Both   | All Ages         | 2.25 | 2.15 | 2.35 | 0     |
| 54 | Syria     | Male   | 15-49 years      | 1.68 | 1.6  | 1.76 | 0     |
| 55 | Syria     | Male   | 50-69 years      | 1.08 | 1.07 | 1.1  | 0     |
| 56 | Syria     | Male   | 70+ years        | 0.99 | 0.94 | 1.03 | 0     |
| 57 | Syria     | Male   | Age-standardized | 1.14 | 1.12 | 1.16 | 0     |



|    |                  |        |                  |      |      |      |   |
|----|------------------|--------|------------------|------|------|------|---|
| 1  |                  |        |                  |      |      |      |   |
| 2  | Syria            | Female | All Ages         | 2.31 | 2.22 | 2.39 | 0 |
| 3  | Syria            | Female | 15-49 years      | 1.7  | 1.61 | 1.78 | 0 |
| 4  | Syria            | Female | 50-69 years      | 1.18 | 1.15 | 1.21 | 0 |
| 5  | Syria            | Female | 70+ years        | 1.09 | 1.05 | 1.13 | 0 |
| 6  | Syria            | Female | Age-standardized | 1.2  | 1.17 | 1.23 | 0 |
| 7  | Syria            | Both   | All Ages         | 2.27 | 2.18 | 2.37 | 0 |
| 8  | Syria            | Both   | 15-49 years      | 1.69 | 1.61 | 1.76 | 0 |
| 9  | Syria            | Both   | 50-69 years      | 1.13 | 1.12 | 1.15 | 0 |
| 10 | Syria            | Both   | 70+ years        | 0.98 | 0.93 | 1.03 | 0 |
| 11 | Tonga            | Both   | Age-standardized | 0.91 | 0.87 | 0.94 | 0 |
| 12 | Iraq             | Male   | All Ages         | 1.44 | 1.36 | 1.52 | 0 |
| 13 | Iraq             | Male   | 15-49 years      | 0.95 | 0.9  | 1.01 | 0 |
| 14 | Iraq             | Male   | 50-69 years      | 0.66 | 0.62 | 0.7  | 0 |
| 15 | Iraq             | Male   | 70+ years        | 0.54 | 0.51 | 0.57 | 0 |
| 16 | Iraq             | Male   | Age-standardized | 0.68 | 0.64 | 0.72 | 0 |
| 17 | Iraq             | Female | All Ages         | 1.15 | 1.02 | 1.28 | 0 |
| 18 | Iraq             | Female | 15-49 years      | 0.67 | 0.59 | 0.76 | 0 |
| 19 | Iraq             | Female | 50-69 years      | 0.44 | 0.37 | 0.52 | 0 |
| 20 | Iraq             | Female | 70+ years        | 0.34 | 0.28 | 0.4  | 0 |
| 21 | Iraq             | Female | Age-standardized | 0.43 | 0.35 | 0.51 | 0 |
| 22 | Iraq             | Both   | All Ages         | 1.33 | 1.24 | 1.43 | 0 |
| 23 | Iraq             | Both   | 15-49 years      | 0.85 | 0.78 | 0.91 | 0 |
| 24 | Iraq             | Both   | 50-69 years      | 0.59 | 0.54 | 0.63 | 0 |
| 25 | Iraq             | Both   | 70+ years        | 0.5  | 0.46 | 0.54 | 0 |
| 26 | Iraq             | Both   | Age-standardized | 0.9  | 0.81 | 0.99 | 0 |
| 27 | Afghanistan      | Both   | Age-standardized | 0.9  | 0.81 | 0.99 | 0 |
| 28 | American Samoa   | Male   | All Ages         | 1.45 | 1.42 | 1.48 | 0 |
| 29 | American Samoa   | Male   | 15-49 years      | 0.93 | 0.86 | 0.99 | 0 |
| 30 | American Samoa   | Male   | 50-69 years      | 0.67 | 0.65 | 0.68 | 0 |
| 31 | American Samoa   | Male   | 70+ years        | 0.55 | 0.53 | 0.56 | 0 |
| 32 | American Samoa   | Male   | Age-standardized | 0.74 | 0.72 | 0.75 | 0 |
| 33 | American Samoa   | Female | All Ages         | 1.78 | 1.76 | 1.8  | 0 |
| 34 | American Samoa   | Female | 15-49 years      | 1.11 | 1    | 1.23 | 0 |
| 35 | American Samoa   | Female | 50-69 years      | 0.93 | 0.91 | 0.95 | 0 |
| 36 | American Samoa   | Female | 70+ years        | 0.75 | 0.72 | 0.78 | 0 |
| 37 | American Samoa   | Female | Age-standardized | 0.96 | 0.93 | 0.99 | 0 |
| 38 | American Samoa   | Both   | All Ages         | 1.61 | 1.59 | 1.63 | 0 |
| 39 | American Samoa   | Both   | 15-49 years      | 1.01 | 0.93 | 1.1  | 0 |
| 40 | American Samoa   | Both   | 50-69 years      | 0.8  | 0.78 | 0.81 | 0 |
| 41 | American Samoa   | Both   | 70+ years        | 0.66 | 0.64 | 0.67 | 0 |
| 42 | American Samoa   | Both   | Age-standardized | 0.89 | 0.86 | 0.93 | 0 |
| 43 | Poland           | Both   | Age-standardized | 0.89 | 0.86 | 0.93 | 0 |
| 44 | Argentina        | Male   | All Ages         | 1.35 | 1.33 | 1.38 | 0 |
| 45 | Argentina        | Male   | 15-49 years      | 1.06 | 1.04 | 1.08 | 0 |
| 46 | Argentina        | Male   | 50-69 years      | 0.89 | 0.87 | 0.92 | 0 |
| 47 | Argentina        | Male   | 70+ years        | 0.59 | 0.57 | 0.61 | 0 |
| 48 | Argentina        | Male   | Age-standardized | 0.91 | 0.89 | 0.94 | 0 |
| 49 | Argentina        | Female | All Ages         | 1.52 | 1.5  | 1.55 | 0 |
| 50 | Argentina        | Female | 15-49 years      | 1.15 | 1.11 | 1.19 | 0 |
| 51 | Argentina        | Female | 50-69 years      | 1.08 | 1.06 | 1.1  | 0 |
| 52 | Argentina        | Female | 70+ years        | 0.98 | 0.95 | 1    | 0 |
| 53 | Argentina        | Female | Age-standardized | 1.07 | 1.05 | 1.08 | 0 |
| 54 | Argentina        | Both   | All Ages         | 1.41 | 1.38 | 1.43 | 0 |
| 55 | Argentina        | Both   | 15-49 years      | 1.09 | 1.06 | 1.11 | 0 |
| 56 | Argentina        | Both   | 50-69 years      | 0.97 | 0.95 | 0.99 | 0 |
| 57 | Argentina        | Both   | 70+ years        | 0.74 | 0.73 | 0.76 | 0 |
| 58 | Argentina        | Both   | Age-standardized | 0.89 | 0.86 | 0.92 | 0 |
| 59 | Marshall Islands | Both   | Age-standardized | 0.89 | 0.86 | 0.92 | 0 |
| 60 | United States    | Male   | All Ages         | 1.79 | 1.68 | 1.9  | 0 |



|    |               |        |                  |      |      |      |   |
|----|---------------|--------|------------------|------|------|------|---|
| 1  |               |        |                  |      |      |      |   |
| 2  | United States | Male   | 15-49 years      | 1.47 | 1.31 | 1.62 | 0 |
| 3  | United States | Male   | 50-69 years      | 1.34 | 1.23 | 1.44 | 0 |
| 4  | United States | Male   | 70+ years        | 1.01 | 0.91 | 1.1  | 0 |
| 5  | United States | Male   | Age-standardized | 1.4  | 1.27 | 1.53 | 0 |
| 6  | United States | Female | All Ages         | 1.24 | 1.17 | 1.31 | 0 |
| 7  | United States | Female | 15-49 years      | 0.99 | 0.85 | 1.14 | 0 |
| 8  | United States | Female | 50-69 years      | 0.78 | 0.74 | 0.83 | 0 |
| 9  | United States | Female | 70+ years        | 0.74 | 0.62 | 0.86 | 0 |
| 10 | United States | Female | Age-standardized | 0.93 | 0.82 | 1.05 | 0 |
| 11 | United States | Both   | All Ages         | 1.56 | 1.46 | 1.65 | 0 |
| 12 | United States | Both   | 15-49 years      | 1.29 | 1.14 | 1.44 | 0 |
| 13 | United States | Both   | 50-69 years      | 1.11 | 1.03 | 1.19 | 0 |
| 14 | United States | Both   | 70+ years        | 0.88 | 0.78 | 0.99 | 0 |
| 15 | United States | Both   | Age-standardized | 0.89 | 0.87 | 0.91 | 0 |
| 16 | Tunisia       | Both   | All Ages         | 1.33 | 1.24 | 1.42 | 0 |
| 17 | Pakistan      | Male   | 15-49 years      | 1.06 | 1.02 | 1.09 | 0 |
| 18 | Pakistan      | Male   | 50-69 years      | 0.88 | 0.86 | 0.91 | 0 |
| 19 | Pakistan      | Male   | 70+ years        | 0.98 | 0.94 | 1.02 | 0 |
| 20 | Pakistan      | Male   | Age-standardized | 0.94 | 0.91 | 0.97 | 0 |
| 21 | Pakistan      | Female | All Ages         | 1.56 | 1.45 | 1.68 | 0 |
| 22 | Pakistan      | Female | 15-49 years      | 1.13 | 1.08 | 1.18 | 0 |
| 23 | Pakistan      | Female | 50-69 years      | 0.99 | 0.94 | 1.04 | 0 |
| 24 | Pakistan      | Female | 70+ years        | 1.17 | 1.13 | 1.22 | 0 |
| 25 | Pakistan      | Female | Age-standardized | 1.03 | 0.99 | 1.07 | 0 |
| 26 | Pakistan      | Both   | All Ages         | 1.4  | 1.3  | 1.5  | 0 |
| 27 | Pakistan      | Both   | 15-49 years      | 1.06 | 1.02 | 1.09 | 0 |
| 28 | Pakistan      | Both   | 50-69 years      | 0.9  | 0.87 | 0.94 | 0 |
| 29 | Pakistan      | Both   | 70+ years        | 0.98 | 0.93 | 1.02 | 0 |
| 30 | Pakistan      | Both   | Age-standardized | 0.88 | 0.81 | 0.94 | 0 |
| 31 | China         | Both   | All Ages         | 1.49 | 1.42 | 1.56 | 0 |
| 32 | South Africa  | Male   | 15-49 years      | 0.96 | 0.89 | 1.04 | 0 |
| 33 | South Africa  | Male   | 50-69 years      | 0.66 | 0.63 | 0.69 | 0 |
| 34 | South Africa  | Male   | 70+ years        | 0.59 | 0.56 | 0.62 | 0 |
| 35 | South Africa  | Male   | Age-standardized | 0.72 | 0.69 | 0.75 | 0 |
| 36 | South Africa  | Female | All Ages         | 1.38 | 1.33 | 1.43 | 0 |
| 37 | South Africa  | Female | 15-49 years      | 0.81 | 0.75 | 0.87 | 0 |
| 38 | South Africa  | Female | 50-69 years      | 0.55 | 0.5  | 0.6  | 0 |
| 39 | South Africa  | Female | 70+ years        | 0.7  | 0.67 | 0.73 | 0 |
| 40 | South Africa  | Female | Age-standardized | 0.58 | 0.54 | 0.62 | 0 |
| 41 | South Africa  | Both   | All Ages         | 1.48 | 1.41 | 1.56 | 0 |
| 42 | South Africa  | Both   | 15-49 years      | 0.98 | 0.9  | 1.06 | 0 |
| 43 | South Africa  | Both   | 50-69 years      | 0.64 | 0.61 | 0.68 | 0 |
| 44 | South Africa  | Both   | 70+ years        | 0.5  | 0.43 | 0.56 | 0 |
| 45 | South Africa  | Both   | Age-standardized | 0.88 | 0.83 | 0.92 | 0 |
| 46 | Costa Rica    | Both   | All Ages         | 1.56 | 1.51 | 1.62 | 0 |
| 47 | Philippines   | Male   | 15-49 years      | 0.97 | 0.87 | 1.06 | 0 |
| 48 | Philippines   | Male   | 50-69 years      | 0.77 | 0.7  | 0.85 | 0 |
| 49 | Philippines   | Male   | 70+ years        | 0.7  | 0.62 | 0.79 | 0 |
| 50 | Philippines   | Male   | Age-standardized | 0.76 | 0.69 | 0.84 | 0 |
| 51 | Philippines   | Female | All Ages         | 1.56 | 1.49 | 1.63 | 0 |
| 52 | Philippines   | Female | 15-49 years      | 0.87 | 0.76 | 0.98 | 0 |
| 53 | Philippines   | Female | 50-69 years      | 0.73 | 0.63 | 0.83 | 0 |
| 54 | Philippines   | Female | 70+ years        | 0.63 | 0.54 | 0.72 | 0 |
| 55 | Philippines   | Female | Age-standardized | 0.67 | 0.57 | 0.76 | 0 |
| 56 | Philippines   | Both   | All Ages         | 1.57 | 1.51 | 1.62 | 0 |
| 57 | Philippines   | Both   | 15-49 years      | 0.94 | 0.84 | 1.04 | 0 |
| 58 | Philippines   | Both   | 50-69 years      |      |      |      |   |
| 59 | Philippines   | Both   | 70+ years        |      |      |      |   |
| 60 | Philippines   | Both   | Age-standardized |      |      |      |   |

|    |             |        |                  |      |       |      |       |
|----|-------------|--------|------------------|------|-------|------|-------|
| 1  |             |        |                  |      |       |      |       |
| 2  | Philippines | Both   | 50-69 years      | 0.75 | 0.67  | 0.83 | 0     |
| 3  | Philippines | Both   | 70+ years        | 0.6  | 0.51  | 0.69 | 0     |
| 4  | Liberia     | Both   | Age-standardized | 0.87 | 0.72  | 1.02 | 0     |
| 5  | Cameroon    | Male   | All Ages         | 0.86 | 0.8   | 0.91 | 0     |
| 6  | Cameroon    | Male   | 15-49 years      | 0.73 | 0.7   | 0.76 | 0     |
| 7  | Cameroon    | Male   | 50-69 years      | 0.65 | 0.63  | 0.66 | 0     |
| 8  | Cameroon    | Male   | 70+ years        | 0.67 | 0.65  | 0.69 | 0     |
| 9  | Cameroon    | Male   | Age-standardized | 0.68 | 0.67  | 0.7  | 0     |
| 10 | Cameroon    | Female | All Ages         | 0.64 | 0.57  | 0.71 | 0     |
| 11 | Cameroon    | Female | 15-49 years      | 0.58 | 0.54  | 0.62 | 0     |
| 12 | Cameroon    | Female | 50-69 years      | 0.51 | 0.47  | 0.55 | 0     |
| 13 | Cameroon    | Female | 70+ years        | 0.69 | 0.65  | 0.73 | 0     |
| 14 | Cameroon    | Female | Age-standardized | 0.57 | 0.53  | 0.61 | 0     |
| 15 | Cameroon    | Both   | All Ages         | 0.78 | 0.73  | 0.84 | 0     |
| 16 | Cameroon    | Both   | 15-49 years      | 0.71 | 0.68  | 0.74 | 0     |
| 17 | Cameroon    | Both   | 50-69 years      | 0.62 | 0.6   | 0.63 | 0     |
| 18 | Cameroon    | Both   | 70+ years        | 0.63 | 0.61  | 0.66 | 0     |
| 19 | Cameroon    | Both   | Age-standardized | 0.87 | 0.82  | 0.92 | 0     |
| 20 | Georgia     | Both   | Age-standardized | 0.87 | 0.82  | 0.92 | 0     |
| 21 | Kyrgyzstan  | Male   | All Ages         | 0.98 | 0.89  | 1.07 | 0     |
| 22 | Kyrgyzstan  | Male   | 15-49 years      | 0.69 | 0.58  | 0.8  | 0     |
| 23 | Kyrgyzstan  | Male   | 50-69 years      | 0.01 | -0.11 | 0.14 | 0.847 |
| 24 | Kyrgyzstan  | Male   | 70+ years        | 0.58 | 0.56  | 0.59 | 0     |
| 25 | Kyrgyzstan  | Male   | Age-standardized | 0.47 | 0.38  | 0.56 | 0     |
| 26 | Kyrgyzstan  | Female | All Ages         | 0.92 | 0.8   | 1.04 | 0     |
| 27 | Kyrgyzstan  | Female | 15-49 years      | 0.7  | 0.61  | 0.79 | 0     |
| 28 | Kyrgyzstan  | Female | 50-69 years      | 0.21 | 0.1   | 0.32 | 0.001 |
| 29 | Kyrgyzstan  | Female | 70+ years        | 0.86 | 0.78  | 0.95 | 0     |
| 30 | Kyrgyzstan  | Female | Age-standardized | 0.63 | 0.53  | 0.73 | 0     |
| 31 | Kyrgyzstan  | Both   | All Ages         | 0.96 | 0.86  | 1.06 | 0     |
| 32 | Kyrgyzstan  | Both   | 15-49 years      | 0.69 | 0.59  | 0.8  | 0     |
| 33 | Kyrgyzstan  | Both   | 50-69 years      | 0.11 | -0.01 | 0.23 | 0.072 |
| 34 | Kyrgyzstan  | Both   | 70+ years        | 0.88 | 0.84  | 0.92 | 0     |
| 35 | Kyrgyzstan  | Both   | Age-standardized | 0.86 | 0.81  | 0.91 | 0     |
| 36 | Macedonia   | Both   | Age-standardized | 0.86 | 0.81  | 0.91 | 0     |
| 37 | Chad        | Male   | All Ages         | 0.3  | 0.29  | 0.32 | 0     |
| 38 | Chad        | Male   | 15-49 years      | 0.57 | 0.53  | 0.6  | 0     |
| 39 | Chad        | Male   | 50-69 years      | 0.55 | 0.54  | 0.57 | 0     |
| 40 | Chad        | Male   | 70+ years        | 0.63 | 0.62  | 0.65 | 0     |
| 41 | Chad        | Male   | Age-standardized | 0.59 | 0.58  | 0.61 | 0     |
| 42 | Chad        | Female | All Ages         | 0.1  | 0.06  | 0.14 | 0     |
| 43 | Chad        | Female | 15-49 years      | 0.57 | 0.54  | 0.59 | 0     |
| 44 | Chad        | Female | 50-69 years      | 0.55 | 0.53  | 0.58 | 0     |
| 45 | Chad        | Female | 70+ years        | 0.7  | 0.69  | 0.71 | 0     |
| 46 | Chad        | Female | Age-standardized | 0.64 | 0.61  | 0.66 | 0     |
| 47 | Chad        | Both   | All Ages         | 0.24 | 0.22  | 0.26 | 0     |
| 48 | Chad        | Both   | 15-49 years      | 0.58 | 0.56  | 0.61 | 0     |
| 49 | Chad        | Both   | 50-69 years      | 0.7  | 0.69  | 0.72 | 0     |
| 50 | Chad        | Both   | 70+ years        | 0.75 | 0.74  | 0.76 | 0     |
| 51 | Chad        | Both   | Age-standardized | 0.85 | 0.79  | 0.9  | 0     |
| 52 | Lithuania   | Both   | Age-standardized | 0.85 | 0.79  | 0.9  | 0     |
| 53 | Uganda      | Male   | All Ages         | 0.67 | 0.51  | 0.82 | 0     |
| 54 | Uganda      | Male   | 15-49 years      | 0.8  | 0.73  | 0.86 | 0     |
| 55 | Uganda      | Male   | 50-69 years      | 0.69 | 0.66  | 0.72 | 0     |
| 56 | Uganda      | Male   | 70+ years        | 0.79 | 0.73  | 0.84 | 0     |
| 57 | Uganda      | Male   | Age-standardized | 0.78 | 0.74  | 0.83 | 0     |
| 58 | Uganda      | Female | All Ages         | 0.4  | 0.26  | 0.55 | 0     |
| 59 | Uganda      | Female | 15-49 years      | 0.29 | 0.24  | 0.35 | 0     |
| 60 | Uganda      | Female | 50-69 years      | 0.1  | 0.09  | 0.12 | 0     |

|    |                |        |                  |      |       |      |       |
|----|----------------|--------|------------------|------|-------|------|-------|
| 1  |                |        |                  |      |       |      |       |
| 2  | Uganda         | Female | 70+ years        | 0.28 | 0.24  | 0.32 | 0     |
| 3  | Uganda         | Female | Age-standardized | 0.23 | 0.2   | 0.25 | 0     |
| 4  | Uganda         | Both   | All Ages         | 0.57 | 0.42  | 0.73 | 0     |
| 5  | Uganda         | Both   | 15-49 years      | 0.61 | 0.55  | 0.68 | 0     |
| 6  | Uganda         | Both   | 50-69 years      | 0.37 | 0.35  | 0.4  | 0     |
| 7  | Uganda         | Both   | 70+ years        | 0.29 | 0.25  | 0.33 | 0     |
| 8  | Romania        | Both   | Age-standardized | 0.85 | 0.83  | 0.87 | 0     |
| 9  | Comoros        | Male   | All Ages         | 1.53 | 1.5   | 1.56 | 0     |
| 10 | Comoros        | Male   | 15-49 years      | 0.96 | 0.94  | 0.98 | 0     |
| 11 | Comoros        | Male   | 50-69 years      | 0.54 | 0.52  | 0.56 | 0     |
| 12 | Comoros        | Male   | 70+ years        | 0.57 | 0.54  | 0.6  | 0     |
| 13 | Comoros        | Male   | Age-standardized | 0.58 | 0.56  | 0.6  | 0     |
| 14 | Comoros        | Female | All Ages         | 1.03 | 0.99  | 1.08 | 0     |
| 15 | Comoros        | Female | 15-49 years      | 0.38 | 0.37  | 0.4  | 0     |
| 16 | Comoros        | Female | 50-69 years      | 0.04 | 0.01  | 0.07 | 0.008 |
| 17 | Comoros        | Female | 70+ years        | 0.19 | 0.16  | 0.21 | 0     |
| 18 | Comoros        | Female | Age-standardized | 0.1  | 0.07  | 0.13 | 0     |
| 19 | Comoros        | Both   | All Ages         | 1.35 | 1.32  | 1.38 | 0     |
| 20 | Comoros        | Both   | 15-49 years      | 0.79 | 0.78  | 0.8  | 0     |
| 21 | Comoros        | Both   | 50-69 years      | 0.28 | 0.24  | 0.32 | 0     |
| 22 | Comoros        | Both   | 70+ years        | 0.28 | 0.26  | 0.3  | 0     |
| 23 | American Samoa | Both   | Age-standardized | 0.84 | 0.82  | 0.86 | 0     |
| 24 | Nigeria        | Male   | All Ages         | 0.07 | -0.02 | 0.15 | 0.127 |
| 25 | Nigeria        | Male   | 15-49 years      | 0.52 | 0.44  | 0.6  | 0     |
| 26 | Nigeria        | Male   | 50-69 years      | 0.56 | 0.49  | 0.63 | 0     |
| 27 | Nigeria        | Male   | 70+ years        | 0.54 | 0.46  | 0.63 | 0     |
| 28 | Nigeria        | Male   | Age-standardized | 0.6  | 0.52  | 0.68 | 0     |
| 29 | Nigeria        | Female | All Ages         | 0.25 | 0.1   | 0.41 | 0.002 |
| 30 | Nigeria        | Female | 15-49 years      | 0.38 | 0.22  | 0.54 | 0     |
| 31 | Nigeria        | Female | 50-69 years      | 0.15 | 0.02  | 0.28 | 0.029 |
| 32 | Nigeria        | Female | 70+ years        | 0.28 | 0.13  | 0.42 | 0.001 |
| 33 | Nigeria        | Female | Age-standardized | 0.23 | 0.09  | 0.37 | 0.002 |
| 34 | Nigeria        | Both   | All Ages         | 0.09 | -0.03 | 0.21 | 0.133 |
| 35 | Nigeria        | Both   | 15-49 years      | 0.41 | 0.3   | 0.52 | 0     |
| 36 | Nigeria        | Both   | 50-69 years      | 0.14 | 0.01  | 0.27 | 0.04  |
| 37 | Nigeria        | Both   | 70+ years        | 0.59 | 0.45  | 0.74 | 0     |
| 38 | South Korea    | Both   | Age-standardized | 0.84 | 0.8   | 0.88 | 0     |
| 39 | Middle SDI     | Male   | All Ages         | 2.03 | 2.01  | 2.04 | 0     |
| 40 | Middle SDI     | Male   | 15-49 years      | 1.32 | 1.27  | 1.36 | 0     |
| 41 | Middle SDI     | Male   | 50-69 years      | 0.93 | 0.91  | 0.95 | 0     |
| 42 | Middle SDI     | Male   | 70+ years        | 0.74 | 0.72  | 0.77 | 0     |
| 43 | Middle SDI     | Male   | Age-standardized | 0.94 | 0.93  | 0.96 | 0     |
| 44 | Middle SDI     | Female | All Ages         | 2.17 | 2.14  | 2.2  | 0     |
| 45 | Middle SDI     | Female | 15-49 years      | 1.36 | 1.31  | 1.42 | 0     |
| 46 | Middle SDI     | Female | 50-69 years      | 1.01 | 0.98  | 1.04 | 0     |
| 47 | Middle SDI     | Female | 70+ years        | 0.91 | 0.88  | 0.94 | 0     |
| 48 | Middle SDI     | Female | Age-standardized | 0.97 | 0.94  | 0.99 | 0     |
| 49 | Middle SDI     | Both   | All Ages         | 2.08 | 2.06  | 2.09 | 0     |
| 50 | Middle SDI     | Both   | 15-49 years      | 1.33 | 1.28  | 1.38 | 0     |
| 51 | Middle SDI     | Both   | 50-69 years      | 0.95 | 0.92  | 0.97 | 0     |
| 52 | Middle SDI     | Both   | 70+ years        | 0.83 | 0.8   | 0.86 | 0     |
| 53 | Middle SDI     | Both   | Age-standardized | 0.94 | 0.92  | 0.96 | 0     |
| 54 | South Korea    | Male   | All Ages         | 1.94 | 1.9   | 1.99 | 0     |
| 55 | South Korea    | Male   | 15-49 years      | 1.06 | 0.97  | 1.15 | 0     |
| 56 | South Korea    | Male   | 50-69 years      | 0.71 | 0.66  | 0.76 | 0     |
| 57 | South Korea    | Male   | 70+ years        | 0.48 | 0.45  | 0.5  | 0     |

|    |             |        |                  |      |      |      |   |
|----|-------------|--------|------------------|------|------|------|---|
| 1  |             |        |                  |      |      |      |   |
| 2  | South Korea | Male   | Age-standardized | 0.69 | 0.65 | 0.73 | 0 |
| 3  | South Korea | Female | All Ages         | 2.44 | 2.37 | 2.51 | 0 |
| 4  | South Korea | Female | 15-49 years      | 1.29 | 1.19 | 1.4  | 0 |
| 5  | South Korea | Female | 50-69 years      | 0.97 | 0.89 | 1.06 | 0 |
| 6  | South Korea | Female | 70+ years        | 0.94 | 0.87 | 1.01 | 0 |
| 7  | South Korea | Female | Age-standardized | 0.96 | 0.9  | 1.02 | 0 |
| 8  | South Korea | Both   | All Ages         | 2.1  | 2.05 | 2.15 | 0 |
| 9  | South Korea | Both   | 15-49 years      | 1.14 | 1.06 | 1.23 | 0 |
| 10 | South Korea | Both   | 50-69 years      | 0.89 | 0.82 | 0.96 | 0 |
| 11 | South Korea | Both   | 70+ years        | 0.82 | 0.78 | 0.86 | 0 |
| 12 | Sri Lanka   | Both   | Age-standardized | 0.84 | 0.79 | 0.88 | 0 |
| 13 | Greenland   | Male   | All Ages         | 1.55 | 1.5  | 1.61 | 0 |
| 14 | Greenland   | Male   | 15-49 years      | 0.86 | 0.77 | 0.95 | 0 |
| 15 | Greenland   | Male   | 50-69 years      | 0.92 | 0.86 | 0.98 | 0 |
| 16 | Greenland   | Male   | 70+ years        | 0.65 | 0.6  | 0.69 | 0 |
| 17 | Greenland   | Male   | Age-standardized | 0.87 | 0.82 | 0.92 | 0 |
| 18 | Greenland   | Female | All Ages         | 1.48 | 1.41 | 1.54 | 0 |
| 19 | Greenland   | Female | 15-49 years      | 0.62 | 0.57 | 0.67 | 0 |
| 20 | Greenland   | Female | 50-69 years      | 0.62 | 0.57 | 0.67 | 0 |
| 21 | Greenland   | Female | 70+ years        | 0.69 | 0.63 | 0.75 | 0 |
| 22 | Greenland   | Female | Age-standardized | 0.65 | 0.62 | 0.69 | 0 |
| 23 | Greenland   | Both   | All Ages         | 1.5  | 1.45 | 1.56 | 0 |
| 24 | Greenland   | Both   | 15-49 years      | 0.69 | 0.62 | 0.77 | 0 |
| 25 | Greenland   | Both   | 50-69 years      | 0.87 | 0.8  | 0.95 | 0 |
| 26 | Greenland   | Both   | 70+ years        | 0.81 | 0.75 | 0.86 | 0 |
| 27 | Lesotho     | Both   | Age-standardized | 0.83 | 0.82 | 0.85 | 0 |
| 28 | Chile       | Male   | All Ages         | 2.04 | 1.9  | 2.18 | 0 |
| 29 | Chile       | Male   | 15-49 years      | 1.31 | 1.15 | 1.47 | 0 |
| 30 | Chile       | Male   | 50-69 years      | 1.05 | 0.94 | 1.16 | 0 |
| 31 | Chile       | Male   | 70+ years        | 0.79 | 0.68 | 0.9  | 0 |
| 32 | Chile       | Male   | Age-standardized | 1.08 | 0.97 | 1.2  | 0 |
| 33 | Chile       | Female | All Ages         | 2.24 | 2.15 | 2.33 | 0 |
| 34 | Chile       | Female | 15-49 years      | 1.41 | 1.29 | 1.53 | 0 |
| 35 | Chile       | Female | 50-69 years      | 1.17 | 1.09 | 1.24 | 0 |
| 36 | Chile       | Female | 70+ years        | 1.08 | 1    | 1.16 | 0 |
| 37 | Chile       | Female | Age-standardized | 1.2  | 1.12 | 1.28 | 0 |
| 38 | Chile       | Both   | All Ages         | 2.11 | 1.99 | 2.23 | 0 |
| 39 | Chile       | Both   | 15-49 years      | 1.36 | 1.21 | 1.5  | 0 |
| 40 | Chile       | Both   | 50-69 years      | 1.11 | 1.01 | 1.21 | 0 |
| 41 | Chile       | Both   | 70+ years        | 0.94 | 0.85 | 1.03 | 0 |
| 42 | Cambodia    | Both   | Age-standardized | 0.83 | 0.81 | 0.86 | 0 |
| 43 | Congo       | Male   | All Ages         | 1.5  | 1.46 | 1.55 | 0 |
| 44 | Congo       | Male   | 15-49 years      | 1.17 | 1.11 | 1.23 | 0 |
| 45 | Congo       | Male   | 50-69 years      | 0.66 | 0.62 | 0.69 | 0 |
| 46 | Congo       | Male   | 70+ years        | 0.67 | 0.63 | 0.7  | 0 |
| 47 | Congo       | Male   | Age-standardized | 0.71 | 0.68 | 0.75 | 0 |
| 48 | Congo       | Female | All Ages         | 0.97 | 0.91 | 1.03 | 0 |
| 49 | Congo       | Female | 15-49 years      | 0.74 | 0.68 | 0.8  | 0 |
| 50 | Congo       | Female | 50-69 years      | 0.33 | 0.28 | 0.37 | 0 |
| 51 | Congo       | Female | 70+ years        | 0.52 | 0.48 | 0.56 | 0 |
| 52 | Congo       | Female | Age-standardized | 0.42 | 0.38 | 0.45 | 0 |
| 53 | Congo       | Both   | All Ages         | 1.31 | 1.26 | 1.35 | 0 |
| 54 | Congo       | Both   | 15-49 years      | 1.01 | 0.97 | 1.06 | 0 |
| 55 | Congo       | Both   | 50-69 years      | 0.6  | 0.56 | 0.63 | 0 |
| 56 | Congo       | Both   | 70+ years        | 0.64 | 0.59 | 0.68 | 0 |
| 57 | Andorra     | Both   | Age-standardized | 0.82 | 0.71 | 0.92 | 0 |

|    |                      |        |                  |      |      |      |       |
|----|----------------------|--------|------------------|------|------|------|-------|
| 1  |                      |        |                  |      |      |      |       |
| 2  | Kazakhstan           | Male   | All Ages         | 1.06 | 1.02 | 1.09 | 0     |
| 3  | Kazakhstan           | Male   | 15-49 years      | 0.73 | 0.58 | 0.87 | 0     |
| 4  | Kazakhstan           | Male   | 50-69 years      | 0.19 | 0.08 | 0.3  | 0.002 |
| 5  | Kazakhstan           | Male   | 70+ years        | 0.45 | 0.39 | 0.5  | 0     |
| 6  | Kazakhstan           | Male   | Age-standardized | 0.44 | 0.34 | 0.55 | 0     |
| 7  | Kazakhstan           | Female | All Ages         | 0.85 | 0.79 | 0.9  | 0     |
| 8  | Kazakhstan           | Female | 15-49 years      | 0.48 | 0.36 | 0.6  | 0     |
| 9  | Kazakhstan           | Female | 50-69 years      | 0.19 | 0.07 | 0.3  | 0.003 |
| 10 | Kazakhstan           | Female | 70+ years        | 0.59 | 0.44 | 0.73 | 0     |
| 11 | Kazakhstan           | Female | Age-standardized | 0.38 | 0.27 | 0.5  | 0     |
| 12 | Kazakhstan           | Both   | All Ages         | 0.97 | 0.92 | 1.02 | 0     |
| 13 | Kazakhstan           | Both   | 15-49 years      | 0.63 | 0.49 | 0.77 | 0     |
| 14 | Kazakhstan           | Both   | 50-69 years      | 0.2  | 0.08 | 0.31 | 0.002 |
| 15 | Kazakhstan           | Both   | 70+ years        | 0.67 | 0.59 | 0.75 | 0     |
| 16 | Kazakhstan           | Both   | Age-standardized | 0.81 | 0.73 | 0.88 | 0     |
| 17 | Croatia              | Both   | All Ages         | 0.57 | 0.49 | 0.64 | 0     |
| 18 | Madagascar           | Male   | 15-49 years      | 0.56 | 0.53 | 0.59 | 0     |
| 19 | Madagascar           | Male   | 50-69 years      | 0.4  | 0.36 | 0.43 | 0     |
| 20 | Madagascar           | Male   | 70+ years        | 0.54 | 0.5  | 0.58 | 0     |
| 21 | Madagascar           | Male   | Age-standardized | 0.49 | 0.45 | 0.53 | 0     |
| 22 | Madagascar           | Female | All Ages         | 0.44 | 0.35 | 0.53 | 0     |
| 23 | Madagascar           | Female | 15-49 years      | 0.36 | 0.33 | 0.4  | 0     |
| 24 | Madagascar           | Female | 50-69 years      | 0.15 | 0.1  | 0.21 | 0     |
| 25 | Madagascar           | Female | 70+ years        | 0.36 | 0.31 | 0.41 | 0     |
| 26 | Madagascar           | Female | Age-standardized | 0.26 | 0.21 | 0.31 | 0     |
| 27 | Madagascar           | Both   | All Ages         | 0.52 | 0.44 | 0.6  | 0     |
| 28 | Madagascar           | Both   | 15-49 years      | 0.49 | 0.46 | 0.52 | 0     |
| 29 | Madagascar           | Both   | 50-69 years      | 0.31 | 0.26 | 0.36 | 0     |
| 30 | Madagascar           | Both   | 70+ years        | 0.27 | 0.22 | 0.31 | 0     |
| 31 | Madagascar           | Both   | Age-standardized | 0.8  | 0.73 | 0.87 | 0     |
| 32 | Virgin Islands, U.S. | Both   | All Ages         | 1.69 | 1.6  | 1.77 | 0     |
| 33 | Slovenia             | Male   | 15-49 years      | 1.17 | 1.12 | 1.21 | 0     |
| 34 | Slovenia             | Male   | 50-69 years      | 0.52 | 0.44 | 0.59 | 0     |
| 35 | Slovenia             | Male   | 70+ years        | 0.67 | 0.56 | 0.78 | 0     |
| 36 | Slovenia             | Male   | Age-standardized | 0.74 | 0.7  | 0.78 | 0     |
| 37 | Slovenia             | Female | All Ages         | 2.13 | 2.01 | 2.24 | 0     |
| 38 | Slovenia             | Female | 15-49 years      | 1.45 | 1.39 | 1.5  | 0     |
| 39 | Slovenia             | Female | 50-69 years      | 1.3  | 1.19 | 1.41 | 0     |
| 40 | Slovenia             | Female | 70+ years        | 1.31 | 1.18 | 1.43 | 0     |
| 41 | Slovenia             | Female | Age-standardized | 1.3  | 1.24 | 1.36 | 0     |
| 42 | Slovenia             | Both   | All Ages         | 1.88 | 1.78 | 1.98 | 0     |
| 43 | Slovenia             | Both   | 15-49 years      | 1.28 | 1.24 | 1.32 | 0     |
| 44 | Slovenia             | Both   | 50-69 years      | 0.93 | 0.84 | 1.03 | 0     |
| 45 | Slovenia             | Both   | 70+ years        | 1.14 | 1.02 | 1.26 | 0     |
| 46 | Slovenia             | Both   | Age-standardized | 0.78 | 0.74 | 0.82 | 0     |
| 47 | Albania              | Both   | All Ages         | 2.54 | 2.48 | 2.59 | 0     |
| 48 | Saudi Arabia         | Male   | 15-49 years      | 1.57 | 1.49 | 1.64 | 0     |
| 49 | Saudi Arabia         | Male   | 50-69 years      | 1.03 | 0.98 | 1.08 | 0     |
| 50 | Saudi Arabia         | Male   | 70+ years        | 0.88 | 0.83 | 0.94 | 0     |
| 51 | Saudi Arabia         | Male   | Age-standardized | 1.13 | 1.07 | 1.2  | 0     |
| 52 | Saudi Arabia         | Female | All Ages         | 3.35 | 3.24 | 3.46 | 0     |
| 53 | Saudi Arabia         | Female | 15-49 years      | 2.02 | 1.9  | 2.15 | 0     |
| 54 | Saudi Arabia         | Female | 50-69 years      | 1.45 | 1.31 | 1.59 | 0     |
| 55 | Saudi Arabia         | Female | 70+ years        | 1.31 | 1.15 | 1.46 | 0     |
| 56 | Saudi Arabia         | Female | Age-standardized | 1.49 | 1.35 | 1.63 | 0     |
| 57 | Saudi Arabia         | Both   | All Ages         | 2.83 | 2.77 | 2.89 | 0     |



|    |              |        |                  |      |      |      |   |
|----|--------------|--------|------------------|------|------|------|---|
| 1  |              |        |                  |      |      |      |   |
| 2  | Saudi Arabia | Both   | 15-49 years      | 1.7  | 1.61 | 1.78 | 0 |
| 3  | Saudi Arabia | Both   | 50-69 years      | 1.16 | 1.09 | 1.23 | 0 |
| 4  | Saudi Arabia | Both   | 70+ years        | 1.08 | 1    | 1.15 | 0 |
| 5  | Italy        | Both   | Age-standardized | 0.78 | 0.68 | 0.89 | 0 |
| 6  | Saint Lucia  | Male   | All Ages         | 2.65 | 2.55 | 2.74 | 0 |
| 7  | Saint Lucia  | Male   | 15-49 years      | 1.62 | 1.51 | 1.73 | 0 |
| 8  | Saint Lucia  | Male   | 50-69 years      | 0.92 | 0.84 | 0.99 | 0 |
| 9  | Saint Lucia  | Male   | 70+ years        | 0.66 | 0.6  | 0.73 | 0 |
| 10 | Saint Lucia  | Male   | Age-standardized | 1.02 | 0.94 | 1.1  | 0 |
| 11 | Saint Lucia  | Female | All Ages         | 2.61 | 2.48 | 2.73 | 0 |
| 12 | Saint Lucia  | Female | 15-49 years      | 1.67 | 1.51 | 1.82 | 0 |
| 13 | Saint Lucia  | Female | 50-69 years      | 0.97 | 0.84 | 1.11 | 0 |
| 14 | Saint Lucia  | Female | 70+ years        | 0.87 | 0.72 | 1.02 | 0 |
| 15 | Saint Lucia  | Female | Age-standardized | 1.05 | 0.92 | 1.19 | 0 |
| 16 | Saint Lucia  | Both   | All Ages         | 2.65 | 2.54 | 2.75 | 0 |
| 17 | Saint Lucia  | Both   | 15-49 years      | 1.66 | 1.53 | 1.79 | 0 |
| 18 | Saint Lucia  | Both   | 50-69 years      | 1    | 0.89 | 1.1  | 0 |
| 19 | Saint Lucia  | Both   | 70+ years        | 0.8  | 0.7  | 0.91 | 0 |
| 20 | Saint Lucia  | Both   | Age-standardized | 0.78 | 0.73 | 0.84 | 0 |
| 21 | Ecuador      | Both   | Age-standardized | 0.78 | 0.73 | 0.84 | 0 |
| 22 | Global       | Male   | All Ages         | 1.69 | 1.68 | 1.7  | 0 |
| 23 | Global       | Male   | 15-49 years      | 1.23 | 1.2  | 1.26 | 0 |
| 24 | Global       | Male   | 50-69 years      | 0.99 | 0.97 | 1.01 | 0 |
| 25 | Global       | Male   | 70+ years        | 0.77 | 0.75 | 0.8  | 0 |
| 26 | Global       | Male   | Age-standardized | 1    | 0.99 | 1.02 | 0 |
| 27 | Global       | Female | All Ages         | 1.82 | 1.8  | 1.83 | 0 |
| 28 | Global       | Female | 15-49 years      | 1.3  | 1.26 | 1.34 | 0 |
| 29 | Global       | Female | 50-69 years      | 1.18 | 1.16 | 1.2  | 0 |
| 30 | Global       | Female | 70+ years        | 1    | 0.97 | 1.04 | 0 |
| 31 | Global       | Female | Age-standardized | 1.12 | 1.1  | 1.13 | 0 |
| 32 | Global       | Both   | All Ages         | 1.74 | 1.73 | 1.75 | 0 |
| 33 | Global       | Both   | 15-49 years      | 1.25 | 1.22 | 1.28 | 0 |
| 34 | Global       | Both   | 50-69 years      | 1.06 | 1.04 | 1.08 | 0 |
| 35 | Global       | Both   | 70+ years        | 0.93 | 0.89 | 0.96 | 0 |
| 36 | Global       | Both   | Age-standardized | 1.05 | 1.04 | 1.07 | 0 |
| 37 | Finland      | Male   | All Ages         | 2.19 | 2    | 2.38 | 0 |
| 38 | Finland      | Male   | 15-49 years      | 1.67 | 1.5  | 1.84 | 0 |
| 39 | Finland      | Male   | 50-69 years      | 1.75 | 1.6  | 1.91 | 0 |
| 40 | Finland      | Male   | 70+ years        | 1.49 | 1.33 | 1.65 | 0 |
| 41 | Finland      | Male   | Age-standardized | 1.73 | 1.56 | 1.9  | 0 |
| 42 | Finland      | Female | All Ages         | 1.92 | 1.8  | 2.03 | 0 |
| 43 | Finland      | Female | 15-49 years      | 1.41 | 1.31 | 1.51 | 0 |
| 44 | Finland      | Female | 50-69 years      | 1.53 | 1.43 | 1.62 | 0 |
| 45 | Finland      | Female | 70+ years        | 1.33 | 1.21 | 1.44 | 0 |
| 46 | Finland      | Female | Age-standardized | 1.49 | 1.37 | 1.6  | 0 |
| 47 | Finland      | Both   | All Ages         | 2.12 | 1.96 | 2.28 | 0 |
| 48 | Finland      | Both   | 15-49 years      | 1.61 | 1.46 | 1.75 | 0 |
| 49 | Finland      | Both   | 50-69 years      | 1.74 | 1.59 | 1.89 | 0 |
| 50 | Finland      | Both   | 70+ years        | 1.65 | 1.51 | 1.79 | 0 |
| 51 | Finland      | Both   | Age-standardized | 0.78 | 0.71 | 0.86 | 0 |
| 52 | Fiji         | Both   | Age-standardized | 0.78 | 0.71 | 0.86 | 0 |
| 53 | Tunisia      | Male   | All Ages         | 2.2  | 2.18 | 2.22 | 0 |
| 54 | Tunisia      | Male   | 15-49 years      | 1.38 | 1.35 | 1.42 | 0 |
| 55 | Tunisia      | Male   | 50-69 years      | 0.83 | 0.81 | 0.86 | 0 |
| 56 | Tunisia      | Male   | 70+ years        | 0.63 | 0.62 | 0.65 | 0 |
| 57 | Tunisia      | Male   | Age-standardized | 0.86 | 0.84 | 0.88 | 0 |
| 58 | Tunisia      | Female | All Ages         | 2.45 | 2.43 | 2.48 | 0 |
| 59 | Tunisia      | Female | 15-49 years      | 1.55 | 1.5  | 1.6  | 0 |
| 60 | Tunisia      | Female | 15-49 years      | 1.55 | 1.5  | 1.6  | 0 |



|    |                       |        |                  |       |       |       |       |
|----|-----------------------|--------|------------------|-------|-------|-------|-------|
| 1  |                       |        |                  |       |       |       |       |
| 2  | Tunisia               | Female | 50-69 years      | 0.99  | 0.97  | 1.01  | 0     |
| 3  | Tunisia               | Female | 70+ years        | 0.83  | 0.82  | 0.84  | 0     |
| 4  | Tunisia               | Female | Age-standardized | 1.01  | 0.99  | 1.03  | 0     |
| 5  | Tunisia               | Both   | All Ages         | 2.28  | 2.27  | 2.3   | 0     |
| 6  | Tunisia               | Both   | 15-49 years      | 1.43  | 1.39  | 1.47  | 0     |
| 7  | Tunisia               | Both   | 50-69 years      | 0.88  | 0.86  | 0.91  | 0     |
| 8  | Tunisia               | Both   | 70+ years        | 0.62  | 0.61  | 0.63  | 0     |
| 9  | Greenland             | Both   | Age-standardized | 0.78  | 0.73  | 0.83  | 0     |
| 10 | Bulgaria              | Male   | All Ages         | 0.5   | 0.39  | 0.62  | 0     |
| 11 | Bulgaria              | Male   | 15-49 years      | 0.33  | 0.12  | 0.55  | 0.003 |
| 12 | Bulgaria              | Male   | 50-69 years      | -0.35 | -0.53 | -0.18 | 0     |
| 13 | Bulgaria              | Male   | 70+ years        | -0.16 | -0.24 | -0.07 | 0.001 |
| 14 | Bulgaria              | Male   | Age-standardized | -0.06 | -0.2  | 0.09  | 0.425 |
| 15 | Bulgaria              | Female | All Ages         | 1.2   | 1.08  | 1.32  | 0     |
| 16 | Bulgaria              | Female | 15-49 years      | 0.49  | 0.31  | 0.68  | 0     |
| 17 | Bulgaria              | Female | 50-69 years      | 0.38  | 0.17  | 0.59  | 0.001 |
| 18 | Bulgaria              | Female | 70+ years        | 0.34  | 0.19  | 0.48  | 0     |
| 19 | Bulgaria              | Female | Age-standardized | 0.33  | 0.18  | 0.48  | 0     |
| 20 | Bulgaria              | Both   | All Ages         | 0.77  | 0.65  | 0.89  | 0     |
| 21 | Bulgaria              | Both   | 15-49 years      | 0.42  | 0.22  | 0.63  | 0     |
| 22 | Bulgaria              | Both   | 50-69 years      | -0.06 | -0.26 | 0.14  | 0.543 |
| 23 | Bulgaria              | Both   | 70+ years        | 0.02  | -0.1  | 0.14  | 0.749 |
| 24 | Bulgaria              | Both   | Age-standardized | 0.11  | -0.05 | 0.26  | 0.171 |
| 25 | Cote d'Ivoire         | Male   | All Ages         | 1.7   | 1.55  | 1.85  | 0     |
| 26 | Cote d'Ivoire         | Male   | 15-49 years      | 1.39  | 1.26  | 1.51  | 0     |
| 27 | Cote d'Ivoire         | Male   | 50-69 years      | 1.14  | 1.02  | 1.27  | 0     |
| 28 | Cote d'Ivoire         | Male   | 70+ years        | 1.16  | 1     | 1.31  | 0     |
| 29 | Cote d'Ivoire         | Male   | Age-standardized | 1.2   | 1.06  | 1.34  | 0     |
| 30 | Cote d'Ivoire         | Female | All Ages         | 1.46  | 1.28  | 1.64  | 0     |
| 31 | Cote d'Ivoire         | Female | 15-49 years      | 1.06  | 0.92  | 1.2   | 0     |
| 32 | Cote d'Ivoire         | Female | 50-69 years      | 0.84  | 0.69  | 1     | 0     |
| 33 | Cote d'Ivoire         | Female | 70+ years        | 0.98  | 0.81  | 1.15  | 0     |
| 34 | Cote d'Ivoire         | Female | Age-standardized | 0.9   | 0.74  | 1.07  | 0     |
| 35 | Cote d'Ivoire         | Both   | All Ages         | 1.62  | 1.46  | 1.78  | 0     |
| 36 | Cote d'Ivoire         | Both   | 15-49 years      | 1.27  | 1.15  | 1.4   | 0     |
| 37 | Cote d'Ivoire         | Both   | 50-69 years      | 1.03  | 0.9   | 1.16  | 0     |
| 38 | Cote d'Ivoire         | Both   | 70+ years        | 1.02  | 0.86  | 1.18  | 0     |
| 39 | Sao Tome and Principe | Both   | Age-standardized | 0.78  | 0.75  | 0.81  | 0     |
| 40 | Cambodia              | Male   | All Ages         | 2.24  | 2.14  | 2.35  | 0     |
| 41 | Cambodia              | Male   | 15-49 years      | 0.97  | 0.91  | 1.03  | 0     |
| 42 | Cambodia              | Male   | 50-69 years      | 0.77  | 0.74  | 0.81  | 0     |
| 43 | Cambodia              | Male   | 70+ years        | 0.63  | 0.6   | 0.66  | 0     |
| 44 | Cambodia              | Male   | Age-standardized | 0.75  | 0.72  | 0.78  | 0     |
| 45 | Cambodia              | Female | All Ages         | 2.2   | 2.12  | 2.29  | 0     |
| 46 | Cambodia              | Female | 15-49 years      | 0.98  | 0.92  | 1.04  | 0     |
| 47 | Cambodia              | Female | 50-69 years      | 0.93  | 0.91  | 0.95  | 0     |
| 48 | Cambodia              | Female | 70+ years        | 0.79  | 0.76  | 0.82  | 0     |
| 49 | Cambodia              | Female | Age-standardized | 0.87  | 0.85  | 0.9   | 0     |
| 50 | Cambodia              | Both   | All Ages         | 2.23  | 2.14  | 2.32  | 0     |
| 51 | Cambodia              | Both   | 15-49 years      | 1.02  | 0.96  | 1.07  | 0     |
| 52 | Cambodia              | Both   | 50-69 years      | 0.85  | 0.82  | 0.87  | 0     |
| 53 | Cambodia              | Both   | 70+ years        | 0.68  | 0.66  | 0.7   | 0     |
| 54 | Barbados              | Both   | Age-standardized | 0.77  | 0.71  | 0.83  | 0     |
| 55 | The Bahamas           | Male   | All Ages         | 1.64  | 1.58  | 1.69  | 0     |
| 56 | The Bahamas           | Male   | 15-49 years      | 1.02  | 0.89  | 1.15  | 0     |
| 57 | The Bahamas           | Male   | 50-69 years      | 0.62  | 0.54  | 0.7   | 0     |

|    |                    |        |                  |      |      |      |   |
|----|--------------------|--------|------------------|------|------|------|---|
| 1  |                    |        |                  |      |      |      |   |
| 2  | The Bahamas        | Male   | 70+ years        | 0.45 | 0.4  | 0.5  | 0 |
| 3  | The Bahamas        | Male   | Age-standardized | 0.66 | 0.59 | 0.73 | 0 |
| 4  | The Bahamas        | Female | All Ages         | 1.59 | 1.55 | 1.63 | 0 |
| 5  | The Bahamas        | Female | 15-49 years      | 1.01 | 0.89 | 1.13 | 0 |
| 6  | The Bahamas        | Female | 50-69 years      | 0.62 | 0.56 | 0.68 | 0 |
| 7  | The Bahamas        | Female | 70+ years        | 0.53 | 0.49 | 0.58 | 0 |
| 8  | The Bahamas        | Female | Age-standardized | 0.65 | 0.59 | 0.7  | 0 |
| 9  | The Bahamas        | Both   | All Ages         | 1.61 | 1.56 | 1.65 | 0 |
| 10 | The Bahamas        | Both   | 15-49 years      | 1.01 | 0.89 | 1.13 | 0 |
| 11 | The Bahamas        | Both   | 50-69 years      | 0.62 | 0.55 | 0.69 | 0 |
| 12 | The Bahamas        | Both   | 70+ years        | 0.56 | 0.52 | 0.6  | 0 |
| 13 | Moldova            | Both   | Age-standardized | 0.75 | 0.62 | 0.89 | 0 |
| 14 | Papua New Guinea   | Male   | All Ages         | 1.26 | 1.21 | 1.31 | 0 |
| 15 | Papua New Guinea   | Male   | 15-49 years      | 1.01 | 0.99 | 1.04 | 0 |
| 16 | Papua New Guinea   | Male   | 50-69 years      | 0.89 | 0.85 | 0.92 | 0 |
| 17 | Papua New Guinea   | Male   | 70+ years        | 0.79 | 0.75 | 0.83 | 0 |
| 18 | Papua New Guinea   | Male   | Age-standardized | 0.9  | 0.87 | 0.93 | 0 |
| 19 | Papua New Guinea   | Female | All Ages         | 1.53 | 1.5  | 1.57 | 0 |
| 20 | Papua New Guinea   | Female | 15-49 years      | 1.31 | 1.27 | 1.36 | 0 |
| 21 | Papua New Guinea   | Female | 50-69 years      | 1.21 | 1.16 | 1.25 | 0 |
| 22 | Papua New Guinea   | Female | 70+ years        | 1.02 | 0.96 | 1.08 | 0 |
| 23 | Papua New Guinea   | Female | Age-standardized | 1.17 | 1.13 | 1.22 | 0 |
| 24 | Papua New Guinea   | Both   | All Ages         | 1.39 | 1.34 | 1.43 | 0 |
| 25 | Papua New Guinea   | Both   | 15-49 years      | 1.15 | 1.12 | 1.18 | 0 |
| 26 | Papua New Guinea   | Both   | 50-69 years      | 1.03 | 1    | 1.07 | 0 |
| 27 | Papua New Guinea   | Both   | 70+ years        | 0.91 | 0.86 | 0.95 | 0 |
| 28 | Ukraine            | Both   | Age-standardized | 0.73 | 0.65 | 0.82 | 0 |
| 29 | Yemen              | Male   | All Ages         | 2.02 | 1.96 | 2.08 | 0 |
| 30 | Yemen              | Male   | 15-49 years      | 1.37 | 1.25 | 1.49 | 0 |
| 31 | Yemen              | Male   | 50-69 years      | 1.2  | 1.17 | 1.23 | 0 |
| 32 | Yemen              | Male   | 70+ years        | 1    | 0.98 | 1.02 | 0 |
| 33 | Yemen              | Male   | Age-standardized | 1.17 | 1.14 | 1.19 | 0 |
| 34 | Yemen              | Female | All Ages         | 2.02 | 1.93 | 2.12 | 0 |
| 35 | Yemen              | Female | 15-49 years      | 1.4  | 1.28 | 1.51 | 0 |
| 36 | Yemen              | Female | 50-69 years      | 1.23 | 1.2  | 1.25 | 0 |
| 37 | Yemen              | Female | 70+ years        | 1.13 | 1.11 | 1.16 | 0 |
| 38 | Yemen              | Female | Age-standardized | 1.25 | 1.22 | 1.28 | 0 |
| 39 | Yemen              | Both   | All Ages         | 2.01 | 1.94 | 2.08 | 0 |
| 40 | Yemen              | Both   | 15-49 years      | 1.38 | 1.27 | 1.49 | 0 |
| 41 | Yemen              | Both   | 50-69 years      | 1.16 | 1.14 | 1.18 | 0 |
| 42 | Yemen              | Both   | 70+ years        | 1.13 | 1.11 | 1.16 | 0 |
| 43 | Russian Federation | Both   | Age-standardized | 0.73 | 0.64 | 0.81 | 0 |
| 44 | Mexico             | Male   | All Ages         | 2.25 | 2.17 | 2.34 | 0 |
| 45 | Mexico             | Male   | 15-49 years      | 1.53 | 1.43 | 1.62 | 0 |
| 46 | Mexico             | Male   | 50-69 years      | 1.05 | 0.97 | 1.13 | 0 |
| 47 | Mexico             | Male   | 70+ years        | 0.76 | 0.7  | 0.83 | 0 |
| 48 | Mexico             | Male   | Age-standardized | 1.1  | 1.03 | 1.18 | 0 |
| 49 | Mexico             | Female | All Ages         | 2.33 | 2.26 | 2.4  | 0 |
| 50 | Mexico             | Female | 15-49 years      | 1.52 | 1.45 | 1.59 | 0 |
| 51 | Mexico             | Female | 50-69 years      | 1.07 | 1.02 | 1.12 | 0 |
| 52 | Mexico             | Female | 70+ years        | 1.03 | 0.95 | 1.1  | 0 |
| 53 | Mexico             | Female | Age-standardized | 1.08 | 1.02 | 1.13 | 0 |
| 54 | Mexico             | Both   | All Ages         | 2.28 | 2.22 | 2.34 | 0 |
| 55 | Mexico             | Both   | 15-49 years      | 1.53 | 1.46 | 1.59 | 0 |
| 56 | Mexico             | Both   | 50-69 years      | 1.04 | 0.99 | 1.1  | 0 |
| 57 | Mexico             | Both   | 70+ years        | 0.86 | 0.8  | 0.92 | 0 |

|    |                     |        |                  |      |      |      |   |
|----|---------------------|--------|------------------|------|------|------|---|
| 1  |                     |        |                  |      |      |      |   |
| 2  | India               | Both   | Age-standardized | 0.72 | 0.71 | 0.74 | 0 |
| 3  | Greece              | Male   | All Ages         | 1.57 | 1.39 | 1.75 | 0 |
| 4  | Greece              | Male   | 15-49 years      | 1.43 | 1.28 | 1.58 | 0 |
| 5  | Greece              | Male   | 50-69 years      | 1    | 0.85 | 1.16 | 0 |
| 6  | Greece              | Male   | 70+ years        | 0.73 | 0.57 | 0.89 | 0 |
| 7  | Greece              | Male   | Age-standardized | 1.04 | 0.89 | 1.19 | 0 |
| 8  | Greece              | Female | All Ages         | 1.92 | 1.73 | 2.11 | 0 |
| 9  | Greece              | Female | 15-49 years      | 1.57 | 1.41 | 1.74 | 0 |
| 10 | Greece              | Female | 50-69 years      | 1.24 | 1.05 | 1.42 | 0 |
| 11 | Greece              | Female | 70+ years        | 1.2  | 1.01 | 1.39 | 0 |
| 12 | Greece              | Female | Age-standardized | 1.24 | 1.07 | 1.41 | 0 |
| 13 | Greece              | Both   | All Ages         | 1.69 | 1.51 | 1.88 | 0 |
| 14 | Greece              | Both   | 15-49 years      | 1.48 | 1.32 | 1.65 | 0 |
| 15 | Greece              | Both   | 50-69 years      | 1.1  | 0.94 | 1.26 | 0 |
| 16 | Greece              | Both   | 70+ years        | 0.96 | 0.78 | 1.14 | 0 |
| 17 | Canada              | Both   | Age-standardized | 0.72 | 0.64 | 0.8  | 0 |
| 18 | Sri Lanka           | Male   | All Ages         | 1.75 | 1.68 | 1.82 | 0 |
| 19 | Sri Lanka           | Male   | 15-49 years      | 1.15 | 1.07 | 1.23 | 0 |
| 20 | Sri Lanka           | Male   | 50-69 years      | 0.92 | 0.85 | 1    | 0 |
| 21 | Sri Lanka           | Male   | 70+ years        | 0.79 | 0.72 | 0.85 | 0 |
| 22 | Sri Lanka           | Male   | Age-standardized | 0.9  | 0.83 | 0.97 | 0 |
| 23 | Sri Lanka           | Female | All Ages         | 1.95 | 1.9  | 2    | 0 |
| 24 | Sri Lanka           | Female | 15-49 years      | 1.11 | 1.07 | 1.14 | 0 |
| 25 | Sri Lanka           | Female | 50-69 years      | 0.93 | 0.89 | 0.96 | 0 |
| 26 | Sri Lanka           | Female | 70+ years        | 0.71 | 0.7  | 0.73 | 0 |
| 27 | Sri Lanka           | Female | Age-standardized | 0.83 | 0.8  | 0.86 | 0 |
| 28 | Sri Lanka           | Both   | All Ages         | 1.82 | 1.77 | 1.88 | 0 |
| 29 | Sri Lanka           | Both   | 15-49 years      | 1.12 | 1.06 | 1.17 | 0 |
| 30 | Sri Lanka           | Both   | 50-69 years      | 0.9  | 0.85 | 0.95 | 0 |
| 31 | Sri Lanka           | Both   | 70+ years        | 0.66 | 0.63 | 0.69 | 0 |
| 32 | Kenya               | Both   | Age-standardized | 0.72 | 0.68 | 0.76 | 0 |
| 33 | Algeria             | Male   | All Ages         | 2.9  | 2.79 | 3    | 0 |
| 34 | Algeria             | Male   | 15-49 years      | 1.9  | 1.75 | 2.06 | 0 |
| 35 | Algeria             | Male   | 50-69 years      | 1.28 | 1.18 | 1.38 | 0 |
| 36 | Algeria             | Male   | 70+ years        | 1.03 | 0.93 | 1.13 | 0 |
| 37 | Algeria             | Male   | Age-standardized | 1.32 | 1.22 | 1.42 | 0 |
| 38 | Algeria             | Female | All Ages         | 2.79 | 2.71 | 2.86 | 0 |
| 39 | Algeria             | Female | 15-49 years      | 1.86 | 1.74 | 1.99 | 0 |
| 40 | Algeria             | Female | 50-69 years      | 1.24 | 1.19 | 1.29 | 0 |
| 41 | Algeria             | Female | 70+ years        | 1.05 | 0.98 | 1.12 | 0 |
| 42 | Algeria             | Female | Age-standardized | 1.27 | 1.21 | 1.32 | 0 |
| 43 | Algeria             | Both   | All Ages         | 2.85 | 2.76 | 2.95 | 0 |
| 44 | Algeria             | Both   | 15-49 years      | 1.88 | 1.74 | 2.02 | 0 |
| 45 | Algeria             | Both   | 50-69 years      | 1.31 | 1.24 | 1.38 | 0 |
| 46 | Algeria             | Both   | 70+ years        | 1.06 | 0.96 | 1.16 | 0 |
| 47 | North Korea         | Both   | Age-standardized | 0.71 | 0.68 | 0.74 | 0 |
| 48 | Trinidad and Tobago | Male   | All Ages         | 2.39 | 2.28 | 2.5  | 0 |
| 49 | Trinidad and Tobago | Male   | 15-49 years      | 1.52 | 1.47 | 1.57 | 0 |
| 50 | Trinidad and Tobago | Male   | 50-69 years      | 1.01 | 0.97 | 1.06 | 0 |
| 51 | Trinidad and Tobago | Male   | 70+ years        | 0.74 | 0.7  | 0.77 | 0 |
| 52 | Trinidad and Tobago | Male   | Age-standardized | 1.1  | 1.05 | 1.15 | 0 |
| 53 | Trinidad and Tobago | Female | All Ages         | 2.56 | 2.46 | 2.67 | 0 |
| 54 | Trinidad and Tobago | Female | 15-49 years      | 1.56 | 1.49 | 1.63 | 0 |
| 55 | Trinidad and Tobago | Female | 50-69 years      | 1.18 | 1.1  | 1.25 | 0 |
| 56 | Trinidad and Tobago | Female | 70+ years        | 1.04 | 0.97 | 1.12 | 0 |
| 57 | Trinidad and Tobago | Female | Age-standardized | 1.2  | 1.13 | 1.28 | 0 |

|    |                     |        |                  |      |      |      |   |
|----|---------------------|--------|------------------|------|------|------|---|
| 1  |                     |        |                  |      |      |      |   |
| 2  | Trinidad and Tobago | Both   | All Ages         | 2.46 | 2.35 | 2.56 | 0 |
| 3  | Trinidad and Tobago | Both   | 15-49 years      | 1.54 | 1.49 | 1.6  | 0 |
| 4  | Trinidad and Tobago | Both   | 50-69 years      | 1.1  | 1.04 | 1.15 | 0 |
| 5  | Trinidad and Tobago | Both   | 70+ years        | 0.85 | 0.81 | 0.89 | 0 |
| 6  | Niger               | Both   | Age-standardized | 0.71 | 0.65 | 0.76 | 0 |
| 7  | Djibouti            | Male   | All Ages         | 2.4  | 2.35 | 2.46 | 0 |
| 8  | Djibouti            | Male   | 15-49 years      | 1.71 | 1.65 | 1.76 | 0 |
| 9  | Djibouti            | Male   | 50-69 years      | 1.28 | 1.23 | 1.34 | 0 |
| 10 | Djibouti            | Male   | 70+ years        | 1.26 | 1.21 | 1.31 | 0 |
| 11 | Djibouti            | Male   | Age-standardized | 1.32 | 1.27 | 1.38 | 0 |
| 12 | Djibouti            | Female | All Ages         | 2.42 | 2.3  | 2.55 | 0 |
| 13 | Djibouti            | Female | 15-49 years      | 1.62 | 1.47 | 1.76 | 0 |
| 14 | Djibouti            | Female | 50-69 years      | 1.13 | 1.03 | 1.22 | 0 |
| 15 | Djibouti            | Female | 70+ years        | 1.27 | 1.18 | 1.35 | 0 |
| 16 | Djibouti            | Female | Age-standardized | 1.19 | 1.1  | 1.28 | 0 |
| 17 | Djibouti            | Both   | All Ages         | 2.4  | 2.33 | 2.47 | 0 |
| 18 | Djibouti            | Both   | 15-49 years      | 1.62 | 1.55 | 1.7  | 0 |
| 19 | Djibouti            | Both   | 50-69 years      | 1.3  | 1.23 | 1.37 | 0 |
| 20 | Djibouti            | Both   | 70+ years        | 1.3  | 1.25 | 1.34 | 0 |
| 21 | Djibouti            | Both   | Age-standardized | 0.71 | 0.63 | 0.8  | 0 |
| 22 | Philippines         | Both   | All Ages         | 1.41 | 1.39 | 1.44 | 0 |
| 23 | Swaziland           | Male   | 15-49 years      | 0.69 | 0.65 | 0.73 | 0 |
| 24 | Swaziland           | Male   | 50-69 years      | 0.47 | 0.46 | 0.49 | 0 |
| 25 | Swaziland           | Male   | 70+ years        | 0.45 | 0.43 | 0.47 | 0 |
| 26 | Swaziland           | Male   | Age-standardized | 0.48 | 0.47 | 0.5  | 0 |
| 27 | Swaziland           | Female | All Ages         | 1.28 | 1.23 | 1.34 | 0 |
| 28 | Swaziland           | Female | 15-49 years      | 0.48 | 0.43 | 0.54 | 0 |
| 29 | Swaziland           | Female | 50-69 years      | 0.39 | 0.34 | 0.43 | 0 |
| 30 | Swaziland           | Female | 70+ years        | 0.49 | 0.45 | 0.54 | 0 |
| 31 | Swaziland           | Female | Age-standardized | 0.4  | 0.35 | 0.45 | 0 |
| 32 | Swaziland           | Both   | All Ages         | 1.38 | 1.35 | 1.42 | 0 |
| 33 | Swaziland           | Both   | 15-49 years      | 0.68 | 0.63 | 0.72 | 0 |
| 34 | Swaziland           | Both   | 50-69 years      | 0.34 | 0.31 | 0.36 | 0 |
| 35 | Swaziland           | Both   | 70+ years        | 0.38 | 0.36 | 0.4  | 0 |
| 36 | Swaziland           | Both   | Age-standardized | 0.7  | 0.65 | 0.74 | 0 |
| 37 | South Africa        | Both   | All Ages         | 2.49 | 2.41 | 2.57 | 0 |
| 38 | Turkmenistan        | Male   | 15-49 years      | 1.65 | 1.57 | 1.73 | 0 |
| 39 | Turkmenistan        | Male   | 50-69 years      | 0.81 | 0.73 | 0.88 | 0 |
| 40 | Turkmenistan        | Male   | 70+ years        | 1.25 | 1.21 | 1.29 | 0 |
| 41 | Turkmenistan        | Male   | Age-standardized | 1.2  | 1.15 | 1.26 | 0 |
| 42 | Turkmenistan        | Female | All Ages         | 2.41 | 2.32 | 2.51 | 0 |
| 43 | Turkmenistan        | Female | 15-49 years      | 1.57 | 1.51 | 1.64 | 0 |
| 44 | Turkmenistan        | Female | 50-69 years      | 0.93 | 0.87 | 0.99 | 0 |
| 45 | Turkmenistan        | Female | 70+ years        | 1.57 | 1.49 | 1.64 | 0 |
| 46 | Turkmenistan        | Female | Age-standardized | 1.31 | 1.23 | 1.4  | 0 |
| 47 | Turkmenistan        | Both   | All Ages         | 2.47 | 2.39 | 2.56 | 0 |
| 48 | Turkmenistan        | Both   | 15-49 years      | 1.66 | 1.59 | 1.74 | 0 |
| 49 | Turkmenistan        | Both   | 50-69 years      | 0.86 | 0.79 | 0.92 | 0 |
| 50 | Turkmenistan        | Both   | 70+ years        | 1.54 | 1.49 | 1.6  | 0 |
| 51 | Tanzania            | Both   | Age-standardized | 0.69 | 0.65 | 0.72 | 0 |
| 52 | Barbados            | Male   | All Ages         | 1.62 | 1.57 | 1.67 | 0 |
| 53 | Barbados            | Male   | 15-49 years      | 1.19 | 1.08 | 1.31 | 0 |
| 54 | Barbados            | Male   | 50-69 years      | 0.78 | 0.75 | 0.81 | 0 |
| 55 | Barbados            | Male   | 70+ years        | 0.63 | 0.59 | 0.66 | 0 |
| 56 | Barbados            | Male   | Age-standardized | 0.86 | 0.81 | 0.91 | 0 |
| 57 | Barbados            | Female | All Ages         | 1.32 | 1.24 | 1.39 | 0 |

|    |            |        |                  |      |      |      |   |
|----|------------|--------|------------------|------|------|------|---|
| 1  |            |        |                  |      |      |      |   |
| 2  | Barbados   | Female | 15-49 years      | 0.93 | 0.78 | 1.08 | 0 |
| 3  | Barbados   | Female | 50-69 years      | 0.54 | 0.48 | 0.61 | 0 |
| 4  | Barbados   | Female | 70+ years        | 0.52 | 0.43 | 0.61 | 0 |
| 5  | Barbados   | Female | Age-standardized | 0.61 | 0.53 | 0.69 | 0 |
| 6  | Barbados   | Both   | All Ages         | 1.49 | 1.43 | 1.55 | 0 |
| 7  | Barbados   | Both   | 15-49 years      | 1.08 | 0.95 | 1.21 | 0 |
| 8  | Barbados   | Both   | 50-69 years      | 0.7  | 0.65 | 0.76 | 0 |
| 9  | Barbados   | Both   | 70+ years        | 0.61 | 0.55 | 0.66 | 0 |
| 10 | Chad       | Both   | Age-standardized | 0.69 | 0.67 | 0.71 | 0 |
| 11 | Senegal    | Male   | All Ages         | 1.03 | 0.91 | 1.14 | 0 |
| 12 | Senegal    | Male   | 15-49 years      | 0.7  | 0.63 | 0.78 | 0 |
| 13 | Senegal    | Male   | 50-69 years      | 0.58 | 0.52 | 0.64 | 0 |
| 14 | Senegal    | Male   | 70+ years        | 0.57 | 0.48 | 0.66 | 0 |
| 15 | Senegal    | Male   | Age-standardized | 0.63 | 0.55 | 0.7  | 0 |
| 16 | Senegal    | Female | All Ages         | 0.88 | 0.75 | 1.01 | 0 |
| 17 | Senegal    | Female | 15-49 years      | 0.42 | 0.31 | 0.53 | 0 |
| 18 | Senegal    | Female | 50-69 years      | 0.24 | 0.14 | 0.35 | 0 |
| 19 | Senegal    | Female | 70+ years        | 0.32 | 0.21 | 0.42 | 0 |
| 20 | Senegal    | Female | Age-standardized | 0.29 | 0.18 | 0.4  | 0 |
| 21 | Senegal    | Both   | All Ages         | 1    | 0.87 | 1.12 | 0 |
| 22 | Senegal    | Both   | 15-49 years      | 0.62 | 0.54 | 0.71 | 0 |
| 23 | Senegal    | Both   | 50-69 years      | 0.42 | 0.35 | 0.49 | 0 |
| 24 | Senegal    | Both   | 70+ years        | 0.4  | 0.3  | 0.49 | 0 |
| 25 | Latvia     | Both   | Age-standardized | 0.68 | 0.59 | 0.78 | 0 |
| 26 | Eritrea    | Male   | All Ages         | 1.17 | 1.08 | 1.25 | 0 |
| 27 | Eritrea    | Male   | 15-49 years      | 0.69 | 0.65 | 0.74 | 0 |
| 28 | Eritrea    | Male   | 50-69 years      | 0.48 | 0.43 | 0.53 | 0 |
| 29 | Eritrea    | Male   | 70+ years        | 0.56 | 0.52 | 0.6  | 0 |
| 30 | Eritrea    | Male   | Age-standardized | 0.54 | 0.49 | 0.58 | 0 |
| 31 | Eritrea    | Female | All Ages         | 0.83 | 0.72 | 0.94 | 0 |
| 32 | Eritrea    | Female | 15-49 years      | 0.38 | 0.34 | 0.42 | 0 |
| 33 | Eritrea    | Female | 50-69 years      | 0.26 | 0.22 | 0.3  | 0 |
| 34 | Eritrea    | Female | 70+ years        | 0.42 | 0.38 | 0.47 | 0 |
| 35 | Eritrea    | Female | Age-standardized | 0.33 | 0.29 | 0.37 | 0 |
| 36 | Eritrea    | Both   | All Ages         | 1.03 | 0.93 | 1.12 | 0 |
| 37 | Eritrea    | Both   | 15-49 years      | 0.59 | 0.55 | 0.63 | 0 |
| 38 | Eritrea    | Both   | 50-69 years      | 0.34 | 0.3  | 0.37 | 0 |
| 39 | Eritrea    | Both   | 70+ years        | 0.4  | 0.36 | 0.43 | 0 |
| 40 | Tajikistan | Both   | Age-standardized | 0.67 | 0.58 | 0.76 | 0 |
| 41 | Singapore  | Male   | All Ages         | 1.77 | 1.72 | 1.81 | 0 |
| 42 | Singapore  | Male   | 15-49 years      | 1.21 | 1.1  | 1.33 | 0 |
| 43 | Singapore  | Male   | 50-69 years      | 0.96 | 0.88 | 1.04 | 0 |
| 44 | Singapore  | Male   | 70+ years        | 0.69 | 0.62 | 0.76 | 0 |
| 45 | Singapore  | Male   | Age-standardized | 0.97 | 0.89 | 1.06 | 0 |
| 46 | Singapore  | Female | All Ages         | 1.92 | 1.85 | 1.99 | 0 |
| 47 | Singapore  | Female | 15-49 years      | 1.29 | 1.13 | 1.46 | 0 |
| 48 | Singapore  | Female | 50-69 years      | 1.25 | 1.14 | 1.35 | 0 |
| 49 | Singapore  | Female | 70+ years        | 1.06 | 0.97 | 1.16 | 0 |
| 50 | Singapore  | Female | Age-standardized | 1.23 | 1.1  | 1.35 | 0 |
| 51 | Singapore  | Both   | All Ages         | 1.73 | 1.67 | 1.79 | 0 |
| 52 | Singapore  | Both   | 15-49 years      | 1.13 | 0.99 | 1.27 | 0 |
| 53 | Singapore  | Both   | 50-69 years      | 1.07 | 0.98 | 1.16 | 0 |
| 54 | Singapore  | Both   | 70+ years        | 0.88 | 0.8  | 0.96 | 0 |
| 55 | Ethiopia   | Both   | Age-standardized | 0.66 | 0.64 | 0.68 | 0 |
| 56 | Uruguay    | Male   | All Ages         | 1.53 | 1.48 | 1.58 | 0 |
| 57 | Uruguay    | Male   | 15-49 years      | 1.33 | 1.3  | 1.36 | 0 |



|    |                       |        |                  |      |      |      |       |
|----|-----------------------|--------|------------------|------|------|------|-------|
| 1  |                       |        |                  |      |      |      |       |
| 2  | Uruguay               | Male   | 50-69 years      | 1.13 | 1.1  | 1.15 | 0     |
| 3  | Uruguay               | Male   | 70+ years        | 0.84 | 0.81 | 0.88 | 0     |
| 4  | Uruguay               | Male   | Age-standardized | 1.18 | 1.14 | 1.21 | 0     |
| 5  | Uruguay               | Female | All Ages         | 1.73 | 1.64 | 1.81 | 0     |
| 6  | Uruguay               | Female | 15-49 years      | 1.39 | 1.33 | 1.46 | 0     |
| 7  | Uruguay               | Female | 50-69 years      | 1.24 | 1.19 | 1.3  | 0     |
| 8  | Uruguay               | Female | 70+ years        | 1.11 | 1.04 | 1.18 | 0     |
| 9  | Uruguay               | Female | Age-standardized | 1.27 | 1.21 | 1.34 | 0     |
| 10 | Uruguay               | Both   | All Ages         | 1.61 | 1.54 | 1.67 | 0     |
| 11 | Uruguay               | Both   | 15-49 years      | 1.35 | 1.31 | 1.39 | 0     |
| 12 | Uruguay               | Both   | 50-69 years      | 1.18 | 1.14 | 1.22 | 0     |
| 13 | Uruguay               | Both   | 70+ years        | 0.98 | 0.93 | 1.03 | 0     |
| 14 | Uruguay               | Both   | Age-standardized | 0.66 | 0.59 | 0.73 | 0     |
| 15 | Serbia                | Both   | Age-standardized | 0.66 | 0.59 | 0.73 | 0     |
| 16 | Tajikistan            | Male   | All Ages         | 1.36 | 1.2  | 1.52 | 0     |
| 17 | Tajikistan            | Male   | 15-49 years      | 0.82 | 0.7  | 0.94 | 0     |
| 18 | Tajikistan            | Male   | 50-69 years      | 0.14 | 0.03 | 0.24 | 0.013 |
| 19 | Tajikistan            | Male   | 70+ years        | 0.75 | 0.73 | 0.77 | 0     |
| 20 | Tajikistan            | Male   | Age-standardized | 0.56 | 0.48 | 0.65 | 0     |
| 21 | Tajikistan            | Female | All Ages         | 1.3  | 1.1  | 1.49 | 0     |
| 22 | Tajikistan            | Female | 15-49 years      | 0.86 | 0.77 | 0.95 | 0     |
| 23 | Tajikistan            | Female | 50-69 years      | 0.29 | 0.19 | 0.4  | 0     |
| 24 | Tajikistan            | Female | 70+ years        | 1.02 | 0.92 | 1.12 | 0     |
| 25 | Tajikistan            | Female | Age-standardized | 0.75 | 0.66 | 0.84 | 0     |
| 26 | Tajikistan            | Both   | All Ages         | 1.34 | 1.17 | 1.52 | 0     |
| 27 | Tajikistan            | Both   | 15-49 years      | 0.84 | 0.74 | 0.95 | 0     |
| 28 | Tajikistan            | Both   | 50-69 years      | 0.21 | 0.1  | 0.32 | 0.001 |
| 29 | Tajikistan            | Both   | 70+ years        | 1.03 | 0.98 | 1.08 | 0     |
| 30 | Tajikistan            | Both   | Age-standardized | 0.66 | 0.63 | 0.68 | 0     |
| 31 | Cameroon              | Both   | Age-standardized | 0.66 | 0.63 | 0.68 | 0     |
| 32 | Sao Tome and Principe | Male   | All Ages         | 1.58 | 1.49 | 1.67 | 0     |
| 33 | Sao Tome and Principe | Male   | 15-49 years      | 1.29 | 1.23 | 1.34 | 0     |
| 34 | Sao Tome and Principe | Male   | 50-69 years      | 0.74 | 0.71 | 0.78 | 0     |
| 35 | Sao Tome and Principe | Male   | 70+ years        | 0.82 | 0.78 | 0.87 | 0     |
| 36 | Sao Tome and Principe | Male   | Age-standardized | 0.85 | 0.81 | 0.88 | 0     |
| 37 | Sao Tome and Principe | Female | All Ages         | 1.12 | 1.1  | 1.14 | 0     |
| 38 | Sao Tome and Principe | Female | 15-49 years      | 0.88 | 0.85 | 0.91 | 0     |
| 39 | Sao Tome and Principe | Female | 50-69 years      | 0.48 | 0.42 | 0.53 | 0     |
| 40 | Sao Tome and Principe | Female | 70+ years        | 0.76 | 0.7  | 0.83 | 0     |
| 41 | Sao Tome and Principe | Female | Age-standardized | 0.59 | 0.54 | 0.65 | 0     |
| 42 | Sao Tome and Principe | Both   | All Ages         | 1.41 | 1.35 | 1.48 | 0     |
| 43 | Sao Tome and Principe | Both   | 15-49 years      | 1.17 | 1.13 | 1.21 | 0     |
| 44 | Sao Tome and Principe | Both   | 50-69 years      | 0.63 | 0.61 | 0.66 | 0     |
| 45 | Sao Tome and Principe | Both   | 70+ years        | 0.78 | 0.71 | 0.85 | 0     |
| 46 | Sao Tome and Principe | Both   | Age-standardized | 0.66 | 0.6  | 0.73 | 0     |
| 47 | The Bahamas           | Both   | Age-standardized | 0.66 | 0.6  | 0.73 | 0     |
| 48 | Norway                | Male   | All Ages         | 1.17 | 1.07 | 1.27 | 0     |
| 49 | Norway                | Male   | 15-49 years      | 1.08 | 0.92 | 1.24 | 0     |
| 50 | Norway                | Male   | 50-69 years      | 0.95 | 0.85 | 1.05 | 0     |
| 51 | Norway                | Male   | 70+ years        | 0.64 | 0.55 | 0.73 | 0     |
| 52 | Norway                | Male   | Age-standardized | 0.97 | 0.86 | 1.09 | 0     |
| 53 | Norway                | Female | All Ages         | 1.32 | 1.19 | 1.44 | 0     |
| 54 | Norway                | Female | 15-49 years      | 1.33 | 1.16 | 1.5  | 0     |
| 55 | Norway                | Female | 50-69 years      | 1.25 | 1.13 | 1.36 | 0     |
| 56 | Norway                | Female | 70+ years        | 1.04 | 0.9  | 1.18 | 0     |
| 57 | Norway                | Female | Age-standardized | 1.26 | 1.12 | 1.39 | 0     |
| 58 | Norway                | Both   | All Ages         | 1.24 | 1.14 | 1.35 | 0     |
| 59 | Norway                | Both   | 15-49 years      | 1.16 | 1    | 1.31 | 0     |
| 60 | Norway                | Both   | 50-69 years      | 1.1  | 0.99 | 1.22 | 0     |



|    |                                  |        |                  |      |      |      |       |
|----|----------------------------------|--------|------------------|------|------|------|-------|
| 1  |                                  |        |                  |      |      |      |       |
| 2  | Norway                           | Both   | 70+ years        | 0.92 | 0.82 | 1.01 | 0     |
| 3  | Zimbabwe                         | Both   | Age-standardized | 0.66 | 0.62 | 0.7  | 0     |
| 4  | Kuwait                           | Male   | All Ages         | 1.67 | 1.64 | 1.7  | 0     |
| 5  | Kuwait                           | Male   | 15-49 years      | 1.27 | 1.25 | 1.3  | 0     |
| 6  | Kuwait                           | Male   | 50-69 years      | 0.85 | 0.84 | 0.86 | 0     |
| 7  | Kuwait                           | Male   | 70+ years        | 0.63 | 0.6  | 0.67 | 0     |
| 8  | Kuwait                           | Male   | Age-standardized | 0.95 | 0.94 | 0.97 | 0     |
| 9  | Kuwait                           | Female | All Ages         | 2.42 | 2.36 | 2.47 | 0     |
| 10 | Kuwait                           | Female | 15-49 years      | 1.69 | 1.64 | 1.73 | 0     |
| 11 | Kuwait                           | Female | 50-69 years      | 1.13 | 1.08 | 1.19 | 0     |
| 12 | Kuwait                           | Female | 70+ years        | 1    | 0.93 | 1.07 | 0     |
| 13 | Kuwait                           | Female | Age-standardized | 1.18 | 1.13 | 1.23 | 0     |
| 14 | Kuwait                           | Both   | All Ages         | 1.86 | 1.81 | 1.9  | 0     |
| 15 | Kuwait                           | Both   | 15-49 years      | 1.32 | 1.29 | 1.36 | 0     |
| 16 | Kuwait                           | Both   | 50-69 years      | 0.86 | 0.84 | 0.88 | 0     |
| 17 | Kuwait                           | Both   | 70+ years        | 0.81 | 0.74 | 0.88 | 0     |
| 18 | Timor-Leste                      | Both   | Age-standardized | 0.65 | 0.62 | 0.68 | 0     |
| 19 | Turkey                           | Male   | All Ages         | 2.17 | 2.09 | 2.24 | 0     |
| 20 | Turkey                           | Male   | 15-49 years      | 1.44 | 1.36 | 1.52 | 0     |
| 21 | Turkey                           | Male   | 50-69 years      | 0.95 | 0.89 | 1.01 | 0     |
| 22 | Turkey                           | Male   | 70+ years        | 0.82 | 0.74 | 0.9  | 0     |
| 23 | Turkey                           | Male   | Age-standardized | 1    | 0.93 | 1.06 | 0     |
| 24 | Turkey                           | Female | All Ages         | 2.24 | 2.15 | 2.33 | 0     |
| 25 | Turkey                           | Female | 15-49 years      | 1.49 | 1.4  | 1.57 | 0     |
| 26 | Turkey                           | Female | 50-69 years      | 1.01 | 0.95 | 1.07 | 0     |
| 27 | Turkey                           | Female | 70+ years        | 0.87 | 0.77 | 0.98 | 0     |
| 28 | Turkey                           | Female | Age-standardized | 1.02 | 0.96 | 1.09 | 0     |
| 29 | Turkey                           | Both   | All Ages         | 2.18 | 2.1  | 2.27 | 0     |
| 30 | Turkey                           | Both   | 15-49 years      | 1.46 | 1.38 | 1.54 | 0     |
| 31 | Turkey                           | Both   | 50-69 years      | 0.98 | 0.93 | 1.04 | 0     |
| 32 | Turkey                           | Both   | 70+ years        | 0.79 | 0.7  | 0.88 | 0     |
| 33 | Japan                            | Both   | Age-standardized | 0.64 | 0.6  | 0.68 | 0     |
| 34 | Russian Federation               | Male   | All Ages         | 1.08 | 1.06 | 1.1  | 0     |
| 35 | Russian Federation               | Male   | 15-49 years      | 0.73 | 0.59 | 0.87 | 0     |
| 36 | Russian Federation               | Male   | 50-69 years      | 0.14 | 0.02 | 0.27 | 0.024 |
| 37 | Russian Federation               | Male   | 70+ years        | 0.26 | 0.23 | 0.29 | 0     |
| 38 | Russian Federation               | Male   | Age-standardized | 0.44 | 0.35 | 0.52 | 0     |
| 39 | Russian Federation               | Female | All Ages         | 1.62 | 1.55 | 1.69 | 0     |
| 40 | Russian Federation               | Female | 15-49 years      | 1.21 | 1.1  | 1.32 | 0     |
| 41 | Russian Federation               | Female | 50-69 years      | 0.73 | 0.61 | 0.85 | 0     |
| 42 | Russian Federation               | Female | 70+ years        | 1.22 | 1.12 | 1.32 | 0     |
| 43 | Russian Federation               | Female | Age-standardized | 1.08 | 0.98 | 1.18 | 0     |
| 44 | Russian Federation               | Both   | All Ages         | 1.28 | 1.24 | 1.32 | 0     |
| 45 | Russian Federation               | Both   | 15-49 years      | 0.85 | 0.72 | 0.99 | 0     |
| 46 | Russian Federation               | Both   | 50-69 years      | 0.42 | 0.3  | 0.53 | 0     |
| 47 | Russian Federation               | Both   | 70+ years        | 1    | 0.94 | 1.06 | 0     |
| 48 | Congo                            | Both   | Age-standardized | 0.64 | 0.61 | 0.67 | 0     |
| 49 | Democratic Republic of the (DRC) | Male   | All Ages         | 0.44 | 0.35 | 0.54 | 0     |
| 50 | Democratic Republic of the (DRC) | Male   | 15-49 years      | 0.3  | 0.24 | 0.36 | 0     |
| 51 | Democratic Republic of the (DRC) | Male   | 50-69 years      | 0.15 | 0.08 | 0.22 | 0     |
| 52 | Democratic Republic of the (DRC) | Male   | 70+ years        | 0.18 | 0.11 | 0.25 | 0     |
| 53 | Democratic Republic of the (DRC) | Male   | Age-standardized | 0.21 | 0.14 | 0.27 | 0     |
| 54 | Democratic Republic of the (DRC) | Female | All Ages         | 0.45 | 0.33 | 0.56 | 0     |
| 55 | Democratic Republic of the (DRC) | Female | 15-49 years      | 0.34 | 0.24 | 0.44 | 0     |
| 56 | Democratic Republic of the (DRC) | Female | 50-69 years      | 0.29 | 0.18 | 0.4  | 0     |
| 57 | Democratic Republic of the (DRC) | Female | 70+ years        | 0.44 | 0.34 | 0.55 | 0     |

|    |                                    |                  |                  |      |      |       |   |
|----|------------------------------------|------------------|------------------|------|------|-------|---|
| 1  |                                    |                  |                  |      |      |       |   |
| 2  | Democratic Republic of the (Female | Age-standardized | 0.36             | 0.25 | 0.46 | 0     |   |
| 3  | Democratic Republic of the (Both   | All Ages         | 0.46             | 0.35 | 0.56 | 0     |   |
| 4  | Democratic Republic of the (Both   | 15-49 years      | 0.34             | 0.26 | 0.41 | 0     |   |
| 5  | Democratic Republic of the (Both   | 50-69 years      | 0.26             | 0.16 | 0.35 | 0     |   |
| 6  | Democratic Republic of the (Both   | 70+ years        | 0.15             | 0.04 | 0.26 | 0.008 |   |
| 7  | Belarus                            | Both             | Age-standardized | 0.61 | 0.51 | 0.72  | 0 |
| 8  | Croatia                            | Male             | All Ages         | 1.28 | 1.17 | 1.38  | 0 |
| 9  | Croatia                            | Male             | 15-49 years      | 0.84 | 0.77 | 0.9   | 0 |
| 10 | Croatia                            | Male             | 50-69 years      | 0.31 | 0.2  | 0.43  | 0 |
| 11 | Croatia                            | Male             | 70+ years        | 0.54 | 0.38 | 0.69  | 0 |
| 12 | Croatia                            | Male             | Age-standardized | 0.57 | 0.5  | 0.64  | 0 |
| 13 | Croatia                            | Female           | All Ages         | 1.79 | 1.66 | 1.91  | 0 |
| 14 | Croatia                            | Female           | 15-49 years      | 1.09 | 1    | 1.19  | 0 |
| 15 | Croatia                            | Female           | 50-69 years      | 0.97 | 0.86 | 1.08  | 0 |
| 16 | Croatia                            | Female           | 70+ years        | 1.21 | 1.07 | 1.35  | 0 |
| 17 | Croatia                            | Female           | Age-standardized | 1.04 | 0.96 | 1.13  | 0 |
| 18 | Croatia                            | Both             | All Ages         | 1.5  | 1.39 | 1.61  | 0 |
| 19 | Croatia                            | Both             | 15-49 years      | 0.93 | 0.86 | 1     | 0 |
| 20 | Croatia                            | Both             | 50-69 years      | 0.63 | 0.52 | 0.75  | 0 |
| 21 | Croatia                            | Both             | 70+ years        | 0.98 | 0.83 | 1.13  | 0 |
| 22 | Rwanda                             | Both             | Age-standardized | 0.59 | 0.46 | 0.73  | 0 |
| 23 | Angola                             | Male             | All Ages         | 1.17 | 1.08 | 1.26  | 0 |
| 24 | Angola                             | Male             | 15-49 years      | 1.44 | 1.36 | 1.51  | 0 |
| 25 | Angola                             | Male             | 50-69 years      | 1.32 | 1.25 | 1.4   | 0 |
| 26 | Angola                             | Male             | 70+ years        | 1.3  | 1.24 | 1.37  | 0 |
| 27 | Angola                             | Male             | Age-standardized | 1.38 | 1.3  | 1.46  | 0 |
| 28 | Angola                             | Female           | All Ages         | 1.18 | 1.05 | 1.31  | 0 |
| 29 | Angola                             | Female           | 15-49 years      | 1.17 | 1.06 | 1.28  | 0 |
| 30 | Angola                             | Female           | 50-69 years      | 1.04 | 0.93 | 1.15  | 0 |
| 31 | Angola                             | Female           | 70+ years        | 1.22 | 1.11 | 1.33  | 0 |
| 32 | Angola                             | Female           | Age-standardized | 1.12 | 1.01 | 1.23  | 0 |
| 33 | Angola                             | Both             | All Ages         | 1.14 | 1.03 | 1.25  | 0 |
| 34 | Angola                             | Both             | 15-49 years      | 1.28 | 1.18 | 1.37  | 0 |
| 35 | Angola                             | Both             | 50-69 years      | 1.14 | 1.05 | 1.23  | 0 |
| 36 | Angola                             | Both             | 70+ years        | 1.15 | 1.08 | 1.23  | 0 |
| 37 | Angola                             | Both             | Age-standardized | 0.59 | 0.54 | 0.64  | 0 |
| 38 | Iraq                               | Both             | All Ages         | 0.8  | 0.73 | 0.87  | 0 |
| 39 | Malawi                             | Male             | 15-49 years      | 0.84 | 0.79 | 0.89  | 0 |
| 40 | Malawi                             | Male             | 50-69 years      | 0.75 | 0.7  | 0.79  | 0 |
| 41 | Malawi                             | Male             | 70+ years        | 0.77 | 0.73 | 0.82  | 0 |
| 42 | Malawi                             | Male             | Age-standardized | 0.79 | 0.75 | 0.84  | 0 |
| 43 | Malawi                             | Female           | All Ages         | 0.5  | 0.41 | 0.58  | 0 |
| 44 | Malawi                             | Female           | 15-49 years      | 0.41 | 0.37 | 0.45  | 0 |
| 45 | Malawi                             | Female           | 50-69 years      | 0.31 | 0.29 | 0.34  | 0 |
| 46 | Malawi                             | Female           | 70+ years        | 0.43 | 0.4  | 0.46  | 0 |
| 47 | Malawi                             | Female           | Age-standardized | 0.39 | 0.36 | 0.41  | 0 |
| 48 | Malawi                             | Both             | All Ages         | 0.66 | 0.59 | 0.74  | 0 |
| 49 | Malawi                             | Both             | 15-49 years      | 0.66 | 0.62 | 0.7   | 0 |
| 50 | Malawi                             | Both             | 50-69 years      | 0.51 | 0.48 | 0.54  | 0 |
| 51 | Malawi                             | Both             | 70+ years        | 0.46 | 0.42 | 0.49  | 0 |
| 52 | Guinea                             | Both             | Age-standardized | 0.58 | 0.52 | 0.63  | 0 |
| 53 | Germany                            | Male             | All Ages         | 1.87 | 1.71 | 2.02  | 0 |
| 54 | Germany                            | Male             | 15-49 years      | 1.53 | 1.36 | 1.7   | 0 |
| 55 | Germany                            | Male             | 50-69 years      | 1.39 | 1.25 | 1.53  | 0 |
| 56 | Germany                            | Male             | 70+ years        | 1.14 | 1.02 | 1.25  | 0 |
| 57 | Germany                            | Male             | Age-standardized | 1.39 | 1.27 | 1.51  | 0 |

|    |                              |        |                  |      |      |      |   |
|----|------------------------------|--------|------------------|------|------|------|---|
| 1  |                              |        |                  |      |      |      |   |
| 2  | Germany                      | Female | All Ages         | 1.81 | 1.7  | 1.91 | 0 |
| 3  | Germany                      | Female | 15-49 years      | 1.52 | 1.4  | 1.64 | 0 |
| 4  | Germany                      | Female | 50-69 years      | 1.4  | 1.28 | 1.52 | 0 |
| 5  | Germany                      | Female | 70+ years        | 1.31 | 1.2  | 1.41 | 0 |
| 6  | Germany                      | Female | Age-standardized | 1.41 | 1.31 | 1.5  | 0 |
| 7  | Germany                      | Both   | All Ages         | 1.87 | 1.73 | 2.01 | 0 |
| 8  | Germany                      | Both   | 15-49 years      | 1.5  | 1.35 | 1.66 | 0 |
| 9  | Germany                      | Both   | 50-69 years      | 1.44 | 1.29 | 1.58 | 0 |
| 10 | Germany                      | Both   | 70+ years        | 1.6  | 1.48 | 1.72 | 0 |
| 11 | Malawi                       | Both   | Age-standardized | 0.58 | 0.55 | 0.62 | 0 |
| 12 | Federated States of Microne: | Male   | All Ages         | 2.16 | 2.07 | 2.25 | 0 |
| 13 | Federated States of Microne: | Male   | 15-49 years      | 1.29 | 1.15 | 1.43 | 0 |
| 14 | Federated States of Microne: | Male   | 50-69 years      | 0.96 | 0.83 | 1.09 | 0 |
| 15 | Federated States of Microne: | Male   | 70+ years        | 0.83 | 0.7  | 0.95 | 0 |
| 16 | Federated States of Microne: | Male   | Age-standardized | 1.06 | 0.92 | 1.2  | 0 |
| 17 | Federated States of Microne: | Female | All Ages         | 2.4  | 2.27 | 2.53 | 0 |
| 18 | Federated States of Microne: | Female | 15-49 years      | 1.54 | 1.37 | 1.72 | 0 |
| 19 | Federated States of Microne: | Female | 50-69 years      | 1.26 | 1.14 | 1.38 | 0 |
| 20 | Federated States of Microne: | Female | 70+ years        | 1.07 | 0.92 | 1.23 | 0 |
| 21 | Federated States of Microne: | Female | Age-standardized | 1.28 | 1.13 | 1.43 | 0 |
| 22 | Federated States of Microne: | Both   | All Ages         | 2.26 | 2.16 | 2.37 | 0 |
| 23 | Federated States of Microne: | Both   | 15-49 years      | 1.4  | 1.25 | 1.55 | 0 |
| 24 | Federated States of Microne: | Both   | 50-69 years      | 1.1  | 0.98 | 1.22 | 0 |
| 25 | Federated States of Microne: | Both   | 70+ years        | 0.9  | 0.76 | 1.03 | 0 |
| 26 | Kyrgyzstan                   | Both   | Age-standardized | 0.57 | 0.48 | 0.66 | 0 |
| 27 | Guam                         | Male   | All Ages         | 1.64 | 1.55 | 1.74 | 0 |
| 28 | Guam                         | Male   | 15-49 years      | 1.15 | 1.13 | 1.17 | 0 |
| 29 | Guam                         | Male   | 50-69 years      | 0.88 | 0.8  | 0.96 | 0 |
| 30 | Guam                         | Male   | 70+ years        | 0.72 | 0.67 | 0.78 | 0 |
| 31 | Guam                         | Male   | Age-standardized | 0.98 | 0.91 | 1.05 | 0 |
| 32 | Guam                         | Female | All Ages         | 2.22 | 2.13 | 2.32 | 0 |
| 33 | Guam                         | Female | 15-49 years      | 1.43 | 1.38 | 1.49 | 0 |
| 34 | Guam                         | Female | 50-69 years      | 1.42 | 1.32 | 1.51 | 0 |
| 35 | Guam                         | Female | 70+ years        | 1.08 | 1    | 1.16 | 0 |
| 36 | Guam                         | Female | Age-standardized | 1.33 | 1.22 | 1.43 | 0 |
| 37 | Guam                         | Both   | All Ages         | 1.87 | 1.77 | 1.97 | 0 |
| 38 | Guam                         | Both   | 15-49 years      | 1.24 | 1.2  | 1.28 | 0 |
| 39 | Guam                         | Both   | 50-69 years      | 1.11 | 1.01 | 1.2  | 0 |
| 40 | Guam                         | Both   | 70+ years        | 0.89 | 0.84 | 0.95 | 0 |
| 41 | The Gambia                   | Both   | Age-standardized | 0.55 | 0.53 | 0.58 | 0 |
| 42 | Jordan                       | Male   | All Ages         | 2.13 | 2.08 | 2.18 | 0 |
| 43 | Jordan                       | Male   | 15-49 years      | 1.67 | 1.64 | 1.71 | 0 |
| 44 | Jordan                       | Male   | 50-69 years      | 1.01 | 0.99 | 1.03 | 0 |
| 45 | Jordan                       | Male   | 70+ years        | 0.92 | 0.88 | 0.96 | 0 |
| 46 | Jordan                       | Male   | Age-standardized | 1.09 | 1.07 | 1.11 | 0 |
| 47 | Jordan                       | Female | All Ages         | 2.3  | 2.25 | 2.35 | 0 |
| 48 | Jordan                       | Female | 15-49 years      | 1.8  | 1.75 | 1.85 | 0 |
| 49 | Jordan                       | Female | 50-69 years      | 1.27 | 1.23 | 1.31 | 0 |
| 50 | Jordan                       | Female | 70+ years        | 1.19 | 1.14 | 1.23 | 0 |
| 51 | Jordan                       | Female | Age-standardized | 1.28 | 1.24 | 1.32 | 0 |
| 52 | Jordan                       | Both   | All Ages         | 2.21 | 2.17 | 2.25 | 0 |
| 53 | Jordan                       | Both   | 15-49 years      | 1.74 | 1.72 | 1.76 | 0 |
| 54 | Jordan                       | Both   | 50-69 years      | 1.09 | 1.08 | 1.1  | 0 |
| 55 | Jordan                       | Both   | 70+ years        | 1.1  | 1.04 | 1.17 | 0 |
| 56 | Northern Mariana Islands     | Both   | Age-standardized | 0.54 | 0.49 | 0.59 | 0 |
| 57 | High SDI                     | Male   | All Ages         | 1.61 | 1.51 | 1.7  | 0 |

|    |                          |        |                  |      |      |      |   |
|----|--------------------------|--------|------------------|------|------|------|---|
| 1  |                          |        |                  |      |      |      |   |
| 2  | High SDI                 | Male   | 15-49 years      | 1.29 | 1.19 | 1.39 | 0 |
| 3  | High SDI                 | Male   | 50-69 years      | 1.06 | 1    | 1.12 | 0 |
| 4  | High SDI                 | Male   | 70+ years        | 0.71 | 0.63 | 0.79 | 0 |
| 5  | High SDI                 | Male   | Age-standardized | 1.1  | 1.02 | 1.18 | 0 |
| 6  | High SDI                 | Female | All Ages         | 1.62 | 1.54 | 1.71 | 0 |
| 7  | High SDI                 | Female | 15-49 years      | 1.33 | 1.23 | 1.42 | 0 |
| 8  | High SDI                 | Female | 50-69 years      | 1.13 | 1.1  | 1.16 | 0 |
| 9  | High SDI                 | Female | 70+ years        | 0.8  | 0.7  | 0.9  | 0 |
| 10 | High SDI                 | Female | Age-standardized | 1.15 | 1.08 | 1.22 | 0 |
| 11 | High SDI                 | Both   | All Ages         | 1.62 | 1.53 | 1.71 | 0 |
| 12 | High SDI                 | Both   | 15-49 years      | 1.3  | 1.2  | 1.4  | 0 |
| 13 | High SDI                 | Both   | 50-69 years      | 1.11 | 1.06 | 1.16 | 0 |
| 14 | High SDI                 | Both   | 70+ years        | 0.83 | 0.74 | 0.92 | 0 |
| 15 | High SDI                 | Both   | Age-standardized | 1.14 | 1.06 | 1.21 | 0 |
| 16 | Zimbabwe                 | Male   | All Ages         | 0.7  | 0.62 | 0.79 | 0 |
| 17 | Zimbabwe                 | Male   | 15-49 years      | 0.63 | 0.56 | 0.69 | 0 |
| 18 | Zimbabwe                 | Male   | 50-69 years      | 0.3  | 0.25 | 0.35 | 0 |
| 19 | Zimbabwe                 | Male   | 70+ years        | 0.26 | 0.21 | 0.31 | 0 |
| 20 | Zimbabwe                 | Male   | Age-standardized | 0.36 | 0.3  | 0.41 | 0 |
| 21 | Zimbabwe                 | Female | All Ages         | 1.65 | 1.6  | 1.69 | 0 |
| 22 | Zimbabwe                 | Female | 15-49 years      | 1.3  | 1.21 | 1.39 | 0 |
| 23 | Zimbabwe                 | Female | 50-69 years      | 1.04 | 0.97 | 1.11 | 0 |
| 24 | Zimbabwe                 | Female | 70+ years        | 1.19 | 1.13 | 1.26 | 0 |
| 25 | Zimbabwe                 | Female | Age-standardized | 1.09 | 1.04 | 1.15 | 0 |
| 26 | Zimbabwe                 | Both   | All Ages         | 1.12 | 1.06 | 1.18 | 0 |
| 27 | Zimbabwe                 | Both   | 15-49 years      | 0.92 | 0.85 | 0.99 | 0 |
| 28 | Zimbabwe                 | Both   | 50-69 years      | 0.55 | 0.49 | 0.6  | 0 |
| 29 | Zimbabwe                 | Both   | 70+ years        | 0.67 | 0.63 | 0.71 | 0 |
| 30 | Zimbabwe                 | Both   | Age-standardized | 0.52 | 0.49 | 0.55 | 0 |
| 31 | Sierra Leone             | Both   | All Ages         | 2.15 | 2.02 | 2.29 | 0 |
| 32 | Uzbekistan               | Male   | 15-49 years      | 1.44 | 1.3  | 1.57 | 0 |
| 33 | Uzbekistan               | Male   | 50-69 years      | 0.69 | 0.62 | 0.77 | 0 |
| 34 | Uzbekistan               | Male   | 70+ years        | 1.41 | 1.36 | 1.45 | 0 |
| 35 | Uzbekistan               | Male   | Age-standardized | 1.1  | 0.98 | 1.22 | 0 |
| 36 | Uzbekistan               | Female | All Ages         | 2.21 | 2.02 | 2.4  | 0 |
| 37 | Uzbekistan               | Female | 15-49 years      | 1.54 | 1.4  | 1.67 | 0 |
| 38 | Uzbekistan               | Female | 50-69 years      | 0.92 | 0.83 | 1.01 | 0 |
| 39 | Uzbekistan               | Female | 70+ years        | 1.62 | 1.48 | 1.75 | 0 |
| 40 | Uzbekistan               | Female | Age-standardized | 1.31 | 1.17 | 1.46 | 0 |
| 41 | Uzbekistan               | Both   | All Ages         | 2.18 | 2.02 | 2.34 | 0 |
| 42 | Uzbekistan               | Both   | 15-49 years      | 1.48 | 1.35 | 1.62 | 0 |
| 43 | Uzbekistan               | Both   | 50-69 years      | 0.8  | 0.72 | 0.87 | 0 |
| 44 | Uzbekistan               | Both   | 70+ years        | 1.62 | 1.54 | 1.7  | 0 |
| 45 | Uzbekistan               | Both   | Age-standardized | 0.49 | 0.45 | 0.53 | 0 |
| 46 | Central African Republic | Both   | All Ages         | 2.11 | 2.03 | 2.19 | 0 |
| 47 | Suriname                 | Male   | 15-49 years      | 1.78 | 1.72 | 1.83 | 0 |
| 48 | Suriname                 | Male   | 50-69 years      | 1.2  | 1.14 | 1.27 | 0 |
| 49 | Suriname                 | Male   | 70+ years        | 1.06 | 1    | 1.13 | 0 |
| 50 | Suriname                 | Male   | Age-standardized | 1.29 | 1.21 | 1.36 | 0 |
| 51 | Suriname                 | Female | All Ages         | 2.2  | 2.15 | 2.25 | 0 |
| 52 | Suriname                 | Female | 15-49 years      | 1.62 | 1.57 | 1.66 | 0 |
| 53 | Suriname                 | Female | 50-69 years      | 1.17 | 1.14 | 1.2  | 0 |
| 54 | Suriname                 | Female | 70+ years        | 1.16 | 1.13 | 1.2  | 0 |
| 55 | Suriname                 | Female | Age-standardized | 1.2  | 1.17 | 1.24 | 0 |
| 56 | Suriname                 | Both   | All Ages         | 2.13 | 2.07 | 2.2  | 0 |
| 57 | Suriname                 | Both   | 15-49 years      | 1.69 | 1.64 | 1.74 | 0 |
| 58 | Suriname                 |        |                  |      |      |      |   |
| 59 | Suriname                 |        |                  |      |      |      |   |
| 60 | Suriname                 |        |                  |      |      |      |   |

|    |                   |        |                  |      |       |      |       |
|----|-------------------|--------|------------------|------|-------|------|-------|
| 1  |                   |        |                  |      |       |      |       |
| 2  | Suriname          | Both   | 50-69 years      | 1.18 | 1.13  | 1.23 | 0     |
| 3  | Suriname          | Both   | 70+ years        | 1.06 | 1.02  | 1.09 | 0     |
| 4  | Uganda            | Both   | Age-standardized | 0.49 | 0.45  | 0.53 | 0     |
| 5  | Afghanistan       | Male   | All Ages         | 0.08 | -0.26 | 0.42 | 0.636 |
| 6  | Afghanistan       | Male   | 15-49 years      | 1.22 | 1.08  | 1.36 | 0     |
| 7  | Afghanistan       | Male   | 50-69 years      | 0.85 | 0.75  | 0.96 | 0     |
| 8  | Afghanistan       | Male   | 70+ years        | 0.68 | 0.6   | 0.77 | 0     |
| 9  | Afghanistan       | Male   | Age-standardized | 0.82 | 0.71  | 0.92 | 0     |
| 10 | Afghanistan       | Female | All Ages         | 0.47 | 0.22  | 0.72 | 0.001 |
| 11 | Afghanistan       | Female | 15-49 years      | 1.4  | 1.27  | 1.54 | 0     |
| 12 | Afghanistan       | Female | 50-69 years      | 1.09 | 1.03  | 1.14 | 0     |
| 13 | Afghanistan       | Female | 70+ years        | 1    | 0.94  | 1.06 | 0     |
| 14 | Afghanistan       | Female | Age-standardized | 1.07 | 1     | 1.14 | 0     |
| 15 | Afghanistan       | Both   | All Ages         | 0.23 | -0.07 | 0.54 | 0.126 |
| 16 | Afghanistan       | Both   | 15-49 years      | 1.32 | 1.19  | 1.45 | 0     |
| 17 | Afghanistan       | Both   | 50-69 years      | 0.83 | 0.73  | 0.93 | 0     |
| 18 | Afghanistan       | Both   | 70+ years        | 0.7  | 0.63  | 0.77 | 0     |
| 19 | Afghanistan       | Both   | Age-standardized | 0.49 | 0.4   | 0.57 | 0     |
| 20 | Senegal           | Both   | Age-standardized | 0.49 | 0.4   | 0.57 | 0     |
| 21 | Brazil            | Male   | All Ages         | 2.32 | 2.3   | 2.34 | 0     |
| 22 | Brazil            | Male   | 15-49 years      | 1.52 | 1.5   | 1.54 | 0     |
| 23 | Brazil            | Male   | 50-69 years      | 1.12 | 1.09  | 1.14 | 0     |
| 24 | Brazil            | Male   | 70+ years        | 0.87 | 0.84  | 0.9  | 0     |
| 25 | Brazil            | Male   | Age-standardized | 1.14 | 1.12  | 1.17 | 0     |
| 26 | Brazil            | Female | All Ages         | 2.54 | 2.51  | 2.56 | 0     |
| 27 | Brazil            | Female | 15-49 years      | 1.63 | 1.61  | 1.65 | 0     |
| 28 | Brazil            | Female | 50-69 years      | 1.22 | 1.17  | 1.27 | 0     |
| 29 | Brazil            | Female | 70+ years        | 1.06 | 1.03  | 1.1  | 0     |
| 30 | Brazil            | Female | Age-standardized | 1.23 | 1.19  | 1.26 | 0     |
| 31 | Brazil            | Both   | All Ages         | 2.41 | 2.39  | 2.43 | 0     |
| 32 | Brazil            | Both   | 15-49 years      | 1.57 | 1.56  | 1.59 | 0     |
| 33 | Brazil            | Both   | 50-69 years      | 1.15 | 1.12  | 1.19 | 0     |
| 34 | Brazil            | Both   | 70+ years        | 0.94 | 0.91  | 0.96 | 0     |
| 35 | Brazil            | Both   | Age-standardized | 0.49 | 0.42  | 0.55 | 0     |
| 36 | Czech Republic    | Both   | Age-standardized | 0.49 | 0.42  | 0.55 | 0     |
| 37 | Thailand          | Male   | All Ages         | 2.85 | 2.81  | 2.9  | 0     |
| 38 | Thailand          | Male   | 15-49 years      | 1.96 | 1.88  | 2.04 | 0     |
| 39 | Thailand          | Male   | 50-69 years      | 1.38 | 1.34  | 1.42 | 0     |
| 40 | Thailand          | Male   | 70+ years        | 1.16 | 1.11  | 1.2  | 0     |
| 41 | Thailand          | Male   | Age-standardized | 1.4  | 1.37  | 1.43 | 0     |
| 42 | Thailand          | Female | All Ages         | 2.87 | 2.79  | 2.95 | 0     |
| 43 | Thailand          | Female | 15-49 years      | 1.93 | 1.82  | 2.04 | 0     |
| 44 | Thailand          | Female | 50-69 years      | 1.4  | 1.32  | 1.48 | 0     |
| 45 | Thailand          | Female | 70+ years        | 1.26 | 1.19  | 1.33 | 0     |
| 46 | Thailand          | Female | Age-standardized | 1.36 | 1.29  | 1.44 | 0     |
| 47 | Thailand          | Both   | All Ages         | 2.85 | 2.81  | 2.9  | 0     |
| 48 | Thailand          | Both   | 15-49 years      | 1.95 | 1.86  | 2.03 | 0     |
| 49 | Thailand          | Both   | 50-69 years      | 1.38 | 1.34  | 1.43 | 0     |
| 50 | Thailand          | Both   | 70+ years        | 1.21 | 1.15  | 1.26 | 0     |
| 51 | Hungary           | Both   | Age-standardized | 0.48 | 0.45  | 0.52 | 0     |
| 52 | Equatorial Guinea | Male   | All Ages         | 1.52 | 1.38  | 1.67 | 0     |
| 53 | Equatorial Guinea | Male   | 15-49 years      | 1.4  | 1.3   | 1.5  | 0     |
| 54 | Equatorial Guinea | Male   | 50-69 years      | 1.31 | 1.19  | 1.44 | 0     |
| 55 | Equatorial Guinea | Male   | 70+ years        | 1.18 | 1.06  | 1.3  | 0     |
| 56 | Equatorial Guinea | Male   | Age-standardized | 1.43 | 1.3   | 1.56 | 0     |
| 57 | Equatorial Guinea | Female | All Ages         | 1.99 | 1.87  | 2.11 | 0     |
| 58 | Equatorial Guinea | Female | 15-49 years      | 1.93 | 1.79  | 2.07 | 0     |
| 59 | Equatorial Guinea | Female | 50-69 years      | 1.73 | 1.6   | 1.86 | 0     |
| 60 | Equatorial Guinea | Female | 50-69 years      | 1.73 | 1.6   | 1.86 | 0     |



|    |                   |        |                  |      |       |      |       |
|----|-------------------|--------|------------------|------|-------|------|-------|
| 1  |                   |        |                  |      |       |      |       |
| 2  | Equatorial Guinea | Female | 70+ years        | 1.84 | 1.7   | 1.98 | 0     |
| 3  | Equatorial Guinea | Female | Age-standardized | 1.86 | 1.71  | 2    | 0     |
| 4  | Equatorial Guinea | Both   | All Ages         | 1.78 | 1.66  | 1.91 | 0     |
| 5  | Equatorial Guinea | Both   | 15-49 years      | 1.76 | 1.64  | 1.87 | 0     |
| 6  | Equatorial Guinea | Both   | 50-69 years      | 1.45 | 1.34  | 1.57 | 0     |
| 7  | Equatorial Guinea | Both   | 70+ years        | 1.5  | 1.37  | 1.63 | 0     |
| 8  | Kazakhstan        | Both   | Age-standardized | 0.45 | 0.34  | 0.56 | 0     |
| 9  | Lebanon           | Male   | All Ages         | 2.03 | 1.98  | 2.07 | 0     |
| 10 | Lebanon           | Male   | 15-49 years      | 1.57 | 1.52  | 1.62 | 0     |
| 11 | Lebanon           | Male   | 50-69 years      | 1.06 | 1.04  | 1.09 | 0     |
| 12 | Lebanon           | Male   | 70+ years        | 0.92 | 0.86  | 0.98 | 0     |
| 13 | Lebanon           | Male   | Age-standardized | 1.12 | 1.09  | 1.15 | 0     |
| 14 | Lebanon           | Female | All Ages         | 2.02 | 1.96  | 2.08 | 0     |
| 15 | Lebanon           | Female | 15-49 years      | 1.54 | 1.49  | 1.59 | 0     |
| 16 | Lebanon           | Female | 50-69 years      | 1.18 | 1.13  | 1.22 | 0     |
| 17 | Lebanon           | Female | 70+ years        | 1.04 | 0.98  | 1.1  | 0     |
| 18 | Lebanon           | Female | Age-standardized | 1.18 | 1.14  | 1.22 | 0     |
| 19 | Lebanon           | Both   | All Ages         | 2.03 | 1.98  | 2.08 | 0     |
| 20 | Lebanon           | Both   | 15-49 years      | 1.59 | 1.54  | 1.64 | 0     |
| 21 | Lebanon           | Both   | 50-69 years      | 1.09 | 1.06  | 1.11 | 0     |
| 22 | Lebanon           | Both   | 70+ years        | 0.97 | 0.9   | 1.03 | 0     |
| 23 | Swaziland         | Both   | Age-standardized | 0.45 | 0.43  | 0.48 | 0     |
| 24 | Nicaragua         | Male   | All Ages         | 3.02 | 2.93  | 3.11 | 0     |
| 25 | Nicaragua         | Male   | 15-49 years      | 1.98 | 1.89  | 2.07 | 0     |
| 26 | Nicaragua         | Male   | 50-69 years      | 1.49 | 1.43  | 1.55 | 0     |
| 27 | Nicaragua         | Male   | 70+ years        | 1.26 | 1.2   | 1.32 | 0     |
| 28 | Nicaragua         | Male   | Age-standardized | 1.59 | 1.52  | 1.66 | 0     |
| 29 | Nicaragua         | Female | All Ages         | 3.12 | 2.99  | 3.25 | 0     |
| 30 | Nicaragua         | Female | 15-49 years      | 2.04 | 1.92  | 2.16 | 0     |
| 31 | Nicaragua         | Female | 50-69 years      | 1.59 | 1.49  | 1.69 | 0     |
| 32 | Nicaragua         | Female | 70+ years        | 1.47 | 1.38  | 1.56 | 0     |
| 33 | Nicaragua         | Female | Age-standardized | 1.64 | 1.53  | 1.74 | 0     |
| 34 | Nicaragua         | Both   | All Ages         | 3.07 | 2.96  | 3.17 | 0     |
| 35 | Nicaragua         | Both   | 15-49 years      | 2.02 | 1.91  | 2.12 | 0     |
| 36 | Nicaragua         | Both   | 50-69 years      | 1.52 | 1.45  | 1.6  | 0     |
| 37 | Nicaragua         | Both   | 70+ years        | 1.35 | 1.28  | 1.42 | 0     |
| 38 | Mozambique        | Both   | Age-standardized | 0.45 | 0.4   | 0.49 | 0     |
| 39 | Czech Republic    | Male   | All Ages         | 1.07 | 1.04  | 1.1  | 0     |
| 40 | Czech Republic    | Male   | 15-49 years      | 0.74 | 0.63  | 0.85 | 0     |
| 41 | Czech Republic    | Male   | 50-69 years      | 0.1  | -0.03 | 0.22 | 0.127 |
| 42 | Czech Republic    | Male   | 70+ years        | 0.14 | 0.12  | 0.17 | 0     |
| 43 | Czech Republic    | Male   | Age-standardized | 0.29 | 0.24  | 0.34 | 0     |
| 44 | Czech Republic    | Female | All Ages         | 1.39 | 1.32  | 1.47 | 0     |
| 45 | Czech Republic    | Female | 15-49 years      | 0.87 | 0.76  | 0.98 | 0     |
| 46 | Czech Republic    | Female | 50-69 years      | 0.69 | 0.48  | 0.91 | 0     |
| 47 | Czech Republic    | Female | 70+ years        | 0.64 | 0.56  | 0.72 | 0     |
| 48 | Czech Republic    | Female | Age-standardized | 0.66 | 0.58  | 0.73 | 0     |
| 49 | Czech Republic    | Both   | All Ages         | 1.21 | 1.16  | 1.25 | 0     |
| 50 | Czech Republic    | Both   | 15-49 years      | 0.81 | 0.7   | 0.92 | 0     |
| 51 | Czech Republic    | Both   | 50-69 years      | 0.39 | 0.23  | 0.54 | 0     |
| 52 | Czech Republic    | Both   | 70+ years        | 0.49 | 0.44  | 0.53 | 0     |
| 53 | Eritrea           | Both   | Age-standardized | 0.44 | 0.41  | 0.47 | 0     |
| 54 | Belize            | Male   | All Ages         | 1.97 | 1.91  | 2.04 | 0     |
| 55 | Belize            | Male   | 15-49 years      | 1.32 | 1.21  | 1.43 | 0     |
| 56 | Belize            | Male   | 50-69 years      | 0.85 | 0.79  | 0.91 | 0     |
| 57 | Belize            | Male   | 70+ years        | 0.67 | 0.6   | 0.74 | 0     |



|    |                      |        |                  |      |      |      |   |
|----|----------------------|--------|------------------|------|------|------|---|
| 1  |                      |        |                  |      |      |      |   |
| 2  | Belize               | Male   | Age-standardized | 0.97 | 0.9  | 1.04 | 0 |
| 3  | Belize               | Female | All Ages         | 2.12 | 1.99 | 2.25 | 0 |
| 4  | Belize               | Female | 15-49 years      | 1.44 | 1.27 | 1.61 | 0 |
| 5  | Belize               | Female | 50-69 years      | 1    | 0.86 | 1.14 | 0 |
| 6  | Belize               | Female | 70+ years        | 0.99 | 0.82 | 1.17 | 0 |
| 7  | Belize               | Female | Age-standardized | 1.08 | 0.93 | 1.23 | 0 |
| 8  | Belize               | Both   | All Ages         | 2.02 | 1.93 | 2.11 | 0 |
| 9  | Belize               | Both   | 15-49 years      | 1.35 | 1.22 | 1.48 | 0 |
| 10 | Belize               | Both   | 50-69 years      | 0.9  | 0.8  | 1    | 0 |
| 11 | Belize               | Both   | 70+ years        | 0.85 | 0.74 | 0.96 | 0 |
| 12 | Montenegro           | Both   | Age-standardized | 0.43 | 0.33 | 0.52 | 0 |
| 13 | United Arab Emirates | Male   | All Ages         | 2.27 | 2.21 | 2.34 | 0 |
| 14 | United Arab Emirates | Male   | 15-49 years      | 1.48 | 1.35 | 1.6  | 0 |
| 15 | United Arab Emirates | Male   | 50-69 years      | 1.04 | 1    | 1.07 | 0 |
| 16 | United Arab Emirates | Male   | 70+ years        | 0.83 | 0.79 | 0.88 | 0 |
| 17 | United Arab Emirates | Male   | Age-standardized | 1.12 | 1.08 | 1.16 | 0 |
| 18 | United Arab Emirates | Female | All Ages         | 3.3  | 3.22 | 3.38 | 0 |
| 19 | United Arab Emirates | Female | 15-49 years      | 2.02 | 1.9  | 2.15 | 0 |
| 20 | United Arab Emirates | Female | 50-69 years      | 1.35 | 1.27 | 1.43 | 0 |
| 21 | United Arab Emirates | Female | 70+ years        | 1.13 | 1.04 | 1.22 | 0 |
| 22 | United Arab Emirates | Female | Age-standardized | 1.39 | 1.3  | 1.48 | 0 |
| 23 | United Arab Emirates | Both   | All Ages         | 2.7  | 2.66 | 2.74 | 0 |
| 24 | United Arab Emirates | Both   | 15-49 years      | 1.7  | 1.58 | 1.81 | 0 |
| 25 | United Arab Emirates | Both   | 50-69 years      | 1.16 | 1.11 | 1.2  | 0 |
| 26 | United Arab Emirates | Both   | 70+ years        | 0.97 | 0.89 | 1.04 | 0 |
| 27 | Mongolia             | Both   | Age-standardized | 0.4  | 0.33 | 0.46 | 0 |
| 28 | Sierra Leone         | Male   | All Ages         | 0.51 | 0.39 | 0.63 | 0 |
| 29 | Sierra Leone         | Male   | 15-49 years      | 0.48 | 0.43 | 0.52 | 0 |
| 30 | Sierra Leone         | Male   | 50-69 years      | 0.57 | 0.53 | 0.6  | 0 |
| 31 | Sierra Leone         | Male   | 70+ years        | 0.6  | 0.57 | 0.63 | 0 |
| 32 | Sierra Leone         | Male   | Age-standardized | 0.62 | 0.6  | 0.65 | 0 |
| 33 | Sierra Leone         | Female | All Ages         | 0.21 | 0.13 | 0.29 | 0 |
| 34 | Sierra Leone         | Female | 15-49 years      | 0.19 | 0.13 | 0.24 | 0 |
| 35 | Sierra Leone         | Female | 50-69 years      | 0.25 | 0.21 | 0.29 | 0 |
| 36 | Sierra Leone         | Female | 70+ years        | 0.43 | 0.38 | 0.47 | 0 |
| 37 | Sierra Leone         | Female | Age-standardized | 0.32 | 0.28 | 0.36 | 0 |
| 38 | Sierra Leone         | Both   | All Ages         | 0.41 | 0.31 | 0.51 | 0 |
| 39 | Sierra Leone         | Both   | 15-49 years      | 0.4  | 0.36 | 0.45 | 0 |
| 40 | Sierra Leone         | Both   | 50-69 years      | 0.48 | 0.43 | 0.52 | 0 |
| 41 | Sierra Leone         | Both   | 70+ years        | 0.42 | 0.39 | 0.46 | 0 |
| 42 | Zambia               | Both   | Age-standardized | 0.39 | 0.36 | 0.43 | 0 |
| 43 | Mauritius            | Male   | All Ages         | 2.36 | 2.32 | 2.4  | 0 |
| 44 | Mauritius            | Male   | 15-49 years      | 1.55 | 1.45 | 1.65 | 0 |
| 45 | Mauritius            | Male   | 50-69 years      | 1.12 | 1.08 | 1.16 | 0 |
| 46 | Mauritius            | Male   | 70+ years        | 0.85 | 0.79 | 0.91 | 0 |
| 47 | Mauritius            | Male   | Age-standardized | 1.19 | 1.14 | 1.24 | 0 |
| 48 | Mauritius            | Female | All Ages         | 2.57 | 2.5  | 2.65 | 0 |
| 49 | Mauritius            | Female | 15-49 years      | 1.66 | 1.52 | 1.8  | 0 |
| 50 | Mauritius            | Female | 50-69 years      | 1.35 | 1.28 | 1.42 | 0 |
| 51 | Mauritius            | Female | 70+ years        | 1.19 | 1.11 | 1.28 | 0 |
| 52 | Mauritius            | Female | Age-standardized | 1.35 | 1.26 | 1.43 | 0 |
| 53 | Mauritius            | Both   | All Ages         | 2.46 | 2.4  | 2.51 | 0 |
| 54 | Mauritius            | Both   | 15-49 years      | 1.6  | 1.48 | 1.71 | 0 |
| 55 | Mauritius            | Both   | 50-69 years      | 1.24 | 1.19 | 1.28 | 0 |
| 56 | Mauritius            | Both   | 70+ years        | 1.04 | 0.97 | 1.11 | 0 |
| 57 | Comoros              | Both   | Age-standardized | 0.39 | 0.37 | 0.42 | 0 |

|    |             |        |                  |      |      |      |   |
|----|-------------|--------|------------------|------|------|------|---|
| 1  |             |        |                  |      |      |      |   |
| 2  | The Gambia  | Male   | All Ages         | 1.02 | 1    | 1.04 | 0 |
| 3  | The Gambia  | Male   | 15-49 years      | 0.76 | 0.72 | 0.8  | 0 |
| 4  | The Gambia  | Male   | 50-69 years      | 0.72 | 0.69 | 0.76 | 0 |
| 5  | The Gambia  | Male   | 70+ years        | 0.73 | 0.7  | 0.76 | 0 |
| 6  | The Gambia  | Male   | Age-standardized | 0.76 | 0.73 | 0.79 | 0 |
| 7  | The Gambia  | Female | All Ages         | 0.92 | 0.87 | 0.97 | 0 |
| 8  | The Gambia  | Female | 15-49 years      | 0.46 | 0.43 | 0.49 | 0 |
| 9  | The Gambia  | Female | 50-69 years      | 0.35 | 0.31 | 0.38 | 0 |
| 10 | The Gambia  | Female | 70+ years        | 0.51 | 0.48 | 0.53 | 0 |
| 11 | The Gambia  | Female | Age-standardized | 0.41 | 0.38 | 0.44 | 0 |
| 12 | The Gambia  | Both   | All Ages         | 0.96 | 0.94 | 0.98 | 0 |
| 13 | The Gambia  | Both   | 15-49 years      | 0.62 | 0.6  | 0.65 | 0 |
| 14 | The Gambia  | Both   | 50-69 years      | 0.47 | 0.45 | 0.5  | 0 |
| 15 | The Gambia  | Both   | 70+ years        | 0.53 | 0.5  | 0.56 | 0 |
| 16 | The Gambia  | Both   | Age-standardized | 0.37 | 0.33 | 0.41 | 0 |
| 17 | Madagascar  | Both   | Age-standardized | 0.37 | 0.33 | 0.41 | 0 |
| 18 | Cuba        | Male   | All Ages         | 2.02 | 1.93 | 2.11 | 0 |
| 19 | Cuba        | Male   | 15-49 years      | 1.6  | 1.53 | 1.67 | 0 |
| 20 | Cuba        | Male   | 50-69 years      | 1.03 | 0.94 | 1.12 | 0 |
| 21 | Cuba        | Male   | 70+ years        | 0.82 | 0.74 | 0.89 | 0 |
| 22 | Cuba        | Male   | Age-standardized | 1.08 | 0.99 | 1.18 | 0 |
| 23 | Cuba        | Female | All Ages         | 2.1  | 2.03 | 2.16 | 0 |
| 24 | Cuba        | Female | 15-49 years      | 1.52 | 1.45 | 1.6  | 0 |
| 25 | Cuba        | Female | 50-69 years      | 1.03 | 0.96 | 1.11 | 0 |
| 26 | Cuba        | Female | 70+ years        | 0.88 | 0.83 | 0.93 | 0 |
| 27 | Cuba        | Female | Age-standardized | 1.02 | 0.96 | 1.08 | 0 |
| 28 | Cuba        | Both   | All Ages         | 2.04 | 1.96 | 2.12 | 0 |
| 29 | Cuba        | Both   | 15-49 years      | 1.58 | 1.51 | 1.65 | 0 |
| 30 | Cuba        | Both   | 50-69 years      | 1.01 | 0.93 | 1.09 | 0 |
| 31 | Cuba        | Both   | 70+ years        | 0.81 | 0.75 | 0.88 | 0 |
| 32 | Cuba        | Both   | Age-standardized | 0.35 | 0.33 | 0.38 | 0 |
| 33 | South Sudan | Both   | Age-standardized | 0.35 | 0.33 | 0.38 | 0 |
| 34 | Timor-Leste | Male   | All Ages         | 0.98 | 0.93 | 1.04 | 0 |
| 35 | Timor-Leste | Male   | 15-49 years      | 0.42 | 0.4  | 0.43 | 0 |
| 36 | Timor-Leste | Male   | 50-69 years      | 0.62 | 0.59 | 0.66 | 0 |
| 37 | Timor-Leste | Male   | 70+ years        | 0.5  | 0.49 | 0.52 | 0 |
| 38 | Timor-Leste | Male   | Age-standardized | 0.56 | 0.53 | 0.59 | 0 |
| 39 | Timor-Leste | Female | All Ages         | 1.21 | 1.13 | 1.29 | 0 |
| 40 | Timor-Leste | Female | 15-49 years      | 0.42 | 0.37 | 0.47 | 0 |
| 41 | Timor-Leste | Female | 50-69 years      | 0.92 | 0.89 | 0.95 | 0 |
| 42 | Timor-Leste | Female | 70+ years        | 0.81 | 0.79 | 0.83 | 0 |
| 43 | Timor-Leste | Female | Age-standardized | 0.8  | 0.77 | 0.83 | 0 |
| 44 | Timor-Leste | Both   | All Ages         | 1.07 | 1.01 | 1.14 | 0 |
| 45 | Timor-Leste | Both   | 15-49 years      | 0.41 | 0.38 | 0.43 | 0 |
| 46 | Timor-Leste | Both   | 50-69 years      | 0.73 | 0.7  | 0.76 | 0 |
| 47 | Timor-Leste | Both   | 70+ years        | 0.61 | 0.59 | 0.63 | 0 |
| 48 | Timor-Leste | Both   | Age-standardized | 0.34 | 0.22 | 0.46 | 0 |
| 49 | Nigeria     | Both   | Age-standardized | 0.34 | 0.22 | 0.46 | 0 |
| 50 | Bangladesh  | Male   | All Ages         | 2.53 | 2.38 | 2.68 | 0 |
| 51 | Bangladesh  | Male   | 15-49 years      | 1.43 | 1.35 | 1.51 | 0 |
| 52 | Bangladesh  | Male   | 50-69 years      | 1.13 | 1.04 | 1.21 | 0 |
| 53 | Bangladesh  | Male   | 70+ years        | 1.22 | 1.13 | 1.31 | 0 |
| 54 | Bangladesh  | Male   | Age-standardized | 1.18 | 1.09 | 1.27 | 0 |
| 55 | Bangladesh  | Female | All Ages         | 2.6  | 2.44 | 2.75 | 0 |
| 56 | Bangladesh  | Female | 15-49 years      | 1.5  | 1.39 | 1.61 | 0 |
| 57 | Bangladesh  | Female | 50-69 years      | 1.04 | 0.94 | 1.15 | 0 |
| 58 | Bangladesh  | Female | 70+ years        | 1.29 | 1.18 | 1.4  | 0 |
| 59 | Bangladesh  | Female | Age-standardized | 1.1  | 1.01 | 1.2  | 0 |
| 60 | Bangladesh  | Both   | All Ages         | 2.52 | 2.37 | 2.66 | 0 |

|    |                            |        |                  |       |       |       |       |
|----|----------------------------|--------|------------------|-------|-------|-------|-------|
| 1  |                            |        |                  |       |       |       |       |
| 2  | Bangladesh                 | Both   | 15-49 years      | 1.4   | 1.32  | 1.49  | 0     |
| 3  | Bangladesh                 | Both   | 50-69 years      | 1.05  | 0.97  | 1.13  | 0     |
| 4  | Bangladesh                 | Both   | 70+ years        | 1.2   | 1.11  | 1.29  | 0     |
| 5  | Burundi                    | Both   | Age-standardized | 0.33  | 0.31  | 0.36  | 0     |
| 6  | Hungary                    | Male   | All Ages         | 0.8   | 0.78  | 0.83  | 0     |
| 7  | Hungary                    | Male   | 15-49 years      | 0.57  | 0.5   | 0.64  | 0     |
| 8  | Hungary                    | Male   | 50-69 years      | -0.02 | -0.09 | 0.05  | 0.554 |
| 9  | Hungary                    | Male   | 70+ years        | 0.24  | 0.19  | 0.3   | 0     |
| 10 | Hungary                    | Male   | Age-standardized | 0.24  | 0.22  | 0.27  | 0     |
| 11 | Hungary                    | Female | All Ages         | 1.47  | 1.44  | 1.51  | 0     |
| 12 | Hungary                    | Female | 15-49 years      | 0.8   | 0.73  | 0.87  | 0     |
| 13 | Hungary                    | Female | 50-69 years      | 0.85  | 0.77  | 0.93  | 0     |
| 14 | Hungary                    | Female | 70+ years        | 0.87  | 0.84  | 0.91  | 0     |
| 15 | Hungary                    | Female | Age-standardized | 0.76  | 0.72  | 0.8   | 0     |
| 16 | Hungary                    | Both   | All Ages         | 1.09  | 1.06  | 1.13  | 0     |
| 17 | Hungary                    | Both   | 15-49 years      | 0.66  | 0.59  | 0.73  | 0     |
| 18 | Hungary                    | Both   | 50-69 years      | 0.4   | 0.32  | 0.47  | 0     |
| 19 | Hungary                    | Both   | 70+ years        | 0.57  | 0.55  | 0.6   | 0     |
| 20 | Hungary                    | Both   | Age-standardized | 0.3   | 0.22  | 0.38  | 0     |
| 21 | Slovakia                   | Both   | Age-standardized | 0.3   | 0.22  | 0.38  | 0     |
| 22 | Ghana                      | Male   | All Ages         | 1.99  | 1.95  | 2.04  | 0     |
| 23 | Ghana                      | Male   | 15-49 years      | 1.6   | 1.56  | 1.65  | 0     |
| 24 | Ghana                      | Male   | 50-69 years      | 1.44  | 1.4   | 1.48  | 0     |
| 25 | Ghana                      | Male   | 70+ years        | 1.45  | 1.4   | 1.5   | 0     |
| 26 | Ghana                      | Male   | Age-standardized | 1.51  | 1.46  | 1.55  | 0     |
| 27 | Ghana                      | Female | All Ages         | 1.79  | 1.74  | 1.84  | 0     |
| 28 | Ghana                      | Female | 15-49 years      | 1.3   | 1.23  | 1.37  | 0     |
| 29 | Ghana                      | Female | 50-69 years      | 1.1   | 1.06  | 1.14  | 0     |
| 30 | Ghana                      | Female | 70+ years        | 1.28  | 1.23  | 1.33  | 0     |
| 31 | Ghana                      | Female | Age-standardized | 1.19  | 1.14  | 1.24  | 0     |
| 32 | Ghana                      | Both   | All Ages         | 1.89  | 1.85  | 1.94  | 0     |
| 33 | Ghana                      | Both   | 15-49 years      | 1.47  | 1.41  | 1.52  | 0     |
| 34 | Ghana                      | Both   | 50-69 years      | 1.24  | 1.2   | 1.28  | 0     |
| 35 | Ghana                      | Both   | 70+ years        | 1.28  | 1.23  | 1.33  | 0     |
| 36 | Ghana                      | Both   | Age-standardized | 0.29  | 0.23  | 0.35  | 0     |
| 37 | Somalia                    | Both   | Age-standardized | 0.29  | 0.23  | 0.35  | 0     |
| 38 | Mozambique                 | Male   | All Ages         | 0.42  | 0.36  | 0.49  | 0     |
| 39 | Mozambique                 | Male   | 15-49 years      | 0.74  | 0.65  | 0.82  | 0     |
| 40 | Mozambique                 | Male   | 50-69 years      | 0.66  | 0.61  | 0.71  | 0     |
| 41 | Mozambique                 | Male   | 70+ years        | 0.7   | 0.65  | 0.75  | 0     |
| 42 | Mozambique                 | Male   | Age-standardized | 0.7   | 0.65  | 0.75  | 0     |
| 43 | Mozambique                 | Female | All Ages         | -0.11 | -0.19 | -0.03 | 0.009 |
| 44 | Mozambique                 | Female | 15-49 years      | 0.11  | 0.03  | 0.19  | 0.013 |
| 45 | Mozambique                 | Female | 50-69 years      | 0.07  | 0.03  | 0.11  | 0.001 |
| 46 | Mozambique                 | Female | 70+ years        | 0.2   | 0.15  | 0.25  | 0     |
| 47 | Mozambique                 | Female | Age-standardized | 0.12  | 0.08  | 0.17  | 0     |
| 48 | Mozambique                 | Both   | All Ages         | 0.21  | 0.15  | 0.28  | 0     |
| 49 | Mozambique                 | Both   | 15-49 years      | 0.5   | 0.41  | 0.59  | 0     |
| 50 | Mozambique                 | Both   | 50-69 years      | 0.38  | 0.34  | 0.43  | 0     |
| 51 | Mozambique                 | Both   | 70+ years        | 0.34  | 0.29  | 0.38  | 0     |
| 52 | Mozambique                 | Both   | Age-standardized | 0.28  | 0.19  | 0.37  | 0     |
| 53 | Democratic Republic of the | Both   | Age-standardized | 0.28  | 0.19  | 0.37  | 0     |
| 54 |                            |        |                  |       |       |       |       |
| 55 |                            |        |                  |       |       |       |       |
| 56 |                            |        |                  |       |       |       |       |
| 57 |                            |        |                  |       |       |       |       |
| 58 |                            |        |                  |       |       |       |       |
| 59 |                            |        |                  |       |       |       |       |
| 60 |                            |        |                  |       |       |       |       |

A

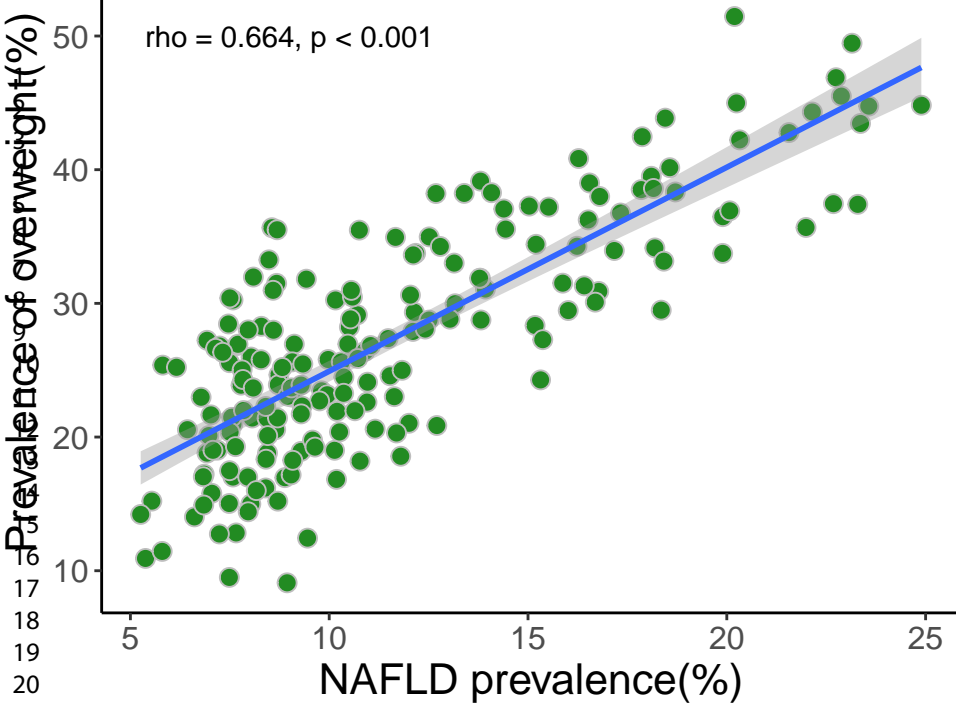

B

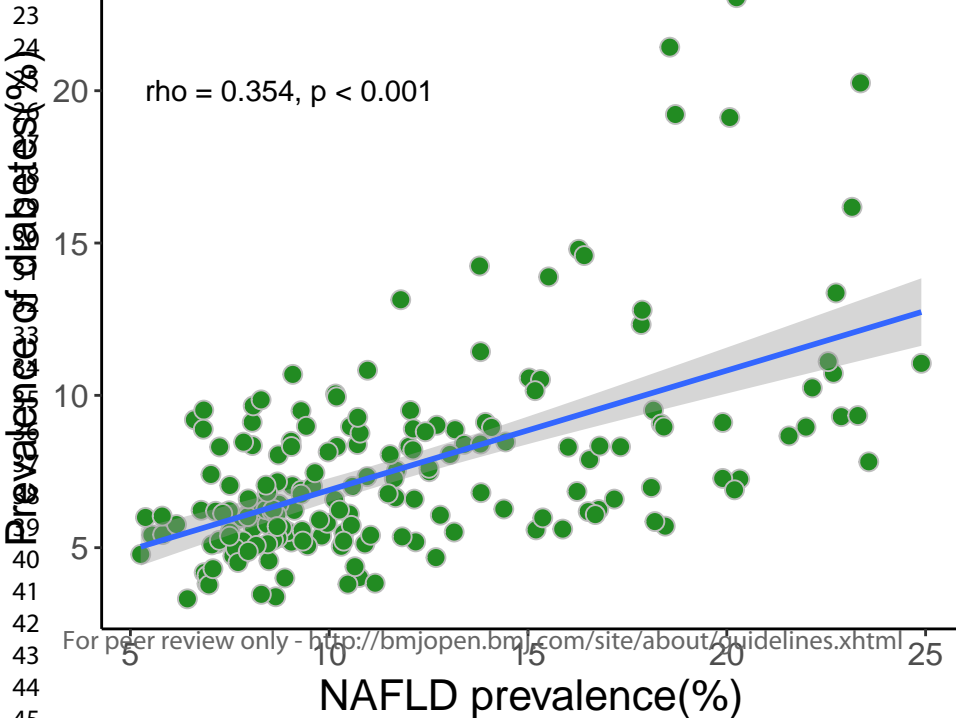

STROBE Statement—Checklist of items that should be included in reports of *cohort studies*

|                              | Item No | Recommendation                                                                                                                                                                                                                                                                                                         | Page No |
|------------------------------|---------|------------------------------------------------------------------------------------------------------------------------------------------------------------------------------------------------------------------------------------------------------------------------------------------------------------------------|---------|
| <b>Title and abstract</b>    | 1       | (a) Indicate the study's design with a commonly used term in the title or the abstract<br>(b) Provide in the abstract an informative and balanced summary of what was done and what was found                                                                                                                          | 1, 2    |
| <b>Introduction</b>          |         |                                                                                                                                                                                                                                                                                                                        |         |
| Background/rationale         | 2       | Explain the scientific background and rationale for the investigation being reported                                                                                                                                                                                                                                   | 3       |
| Objectives                   | 3       | State specific objectives, including any prespecified hypotheses                                                                                                                                                                                                                                                       | 3       |
| <b>Methods</b>               |         |                                                                                                                                                                                                                                                                                                                        |         |
| Study design                 | 4       | Present key elements of study design early in the paper                                                                                                                                                                                                                                                                | 4       |
| Setting                      | 5       | Describe the setting, locations, and relevant dates, including periods of recruitment, exposure, follow-up, and data collection                                                                                                                                                                                        | 4       |
| Participants                 | 6       | (a) Give the eligibility criteria, and the sources and methods of selection of participants. Describe methods of follow-up<br>(b) For matched studies, give matching criteria and number of exposed and unexposed                                                                                                      | 4       |
| Variables                    | 7       | Clearly define all outcomes, exposures, predictors, potential confounders, and effect modifiers. Give diagnostic criteria, if applicable                                                                                                                                                                               | 4       |
| Data sources/<br>measurement | 8*      | For each variable of interest, give sources of data and details of methods of assessment (measurement). Describe comparability of assessment methods if there is more than one group                                                                                                                                   | 4       |
| Bias                         | 9       | Describe any efforts to address potential sources of bias                                                                                                                                                                                                                                                              | 4       |
| Study size                   | 10      | Explain how the study size was arrived at                                                                                                                                                                                                                                                                              | 4       |
| Quantitative variables       | 11      | Explain how quantitative variables were handled in the analyses. If applicable, describe which groupings were chosen and why                                                                                                                                                                                           | 4       |
| Statistical methods          | 12      | (a) Describe all statistical methods, including those used to control for confounding<br>(b) Describe any methods used to examine subgroups and interactions<br>(c) Explain how missing data were addressed<br>(d) If applicable, explain how loss to follow-up was addressed<br>(e) Describe any sensitivity analyses | 4       |
| <b>Results</b>               |         |                                                                                                                                                                                                                                                                                                                        |         |
| Participants                 | 13*     | (a) Report numbers of individuals at each stage of study—eg numbers potentially eligible, examined for eligibility, confirmed eligible, included in the study, completing follow-up, and analysed<br>(b) Give reasons for non-participation at each stage<br>(c) Consider use of a flow diagram                        | 5       |
| Descriptive data             | 14*     | (a) Give characteristics of study participants (eg demographic, clinical, social) and information on exposures and potential confounders<br>(b) Indicate number of participants with missing data for each variable of interest<br>(c) Summarise follow-up time (eg, average and total amount)                         | 5       |
| Outcome data                 | 15*     | Report numbers of outcome events or summary measures over time                                                                                                                                                                                                                                                         | 6       |

|    |                          |    |                                                                                                                                                                                                              |     |
|----|--------------------------|----|--------------------------------------------------------------------------------------------------------------------------------------------------------------------------------------------------------------|-----|
| 1  | Main results             | 16 | (a) Give unadjusted estimates and, if applicable, confounder-adjusted estimates and their precision (eg, 95% confidence interval). Make clear which confounders were adjusted for and why they were included | 5-6 |
| 2  |                          |    | (b) Report category boundaries when continuous variables were categorized                                                                                                                                    |     |
| 3  |                          |    | (c) If relevant, consider translating estimates of relative risk into absolute risk for a meaningful time period                                                                                             |     |
| 4  | Other analyses           | 17 | Report other analyses done—eg analyses of subgroups and interactions, and sensitivity analyses                                                                                                               |     |
| 5  | <b>Discussion</b>        |    |                                                                                                                                                                                                              |     |
| 6  | Key results              | 18 | Summarise key results with reference to study objectives                                                                                                                                                     | 6   |
| 7  | Limitations              | 19 | Discuss limitations of the study, taking into account sources of potential bias or imprecision. Discuss both direction and magnitude of any potential bias                                                   | 8   |
| 8  | Interpretation           | 20 | Give a cautious overall interpretation of results considering objectives, limitations, multiplicity of analyses, results from similar studies, and other relevant evidence                                   | 7-8 |
| 9  | Generalisability         | 21 | Discuss the generalisability (external validity) of the study results                                                                                                                                        | 7   |
| 10 | <b>Other information</b> |    |                                                                                                                                                                                                              |     |
| 11 | Funding                  | 22 | Give the source of funding and the role of the funders for the present study and, if applicable, for the original study on which the present article is based                                                | 1   |

\*Give information separately for exposed and unexposed groups.

**Note:** An Explanation and Elaboration article discusses each checklist item and gives methodological background and published examples of transparent reporting. The STROBE checklist is best used in conjunction with this article (freely available on the Web sites of PLoS Medicine at <http://www.plosmedicine.org/>, Annals of Internal Medicine at <http://www.annals.org/>, and Epidemiology at <http://www.epidem.com/>). Information on the STROBE Initiative is available at <http://www.strobe-statement.org>.
