# Supplementary material for: Prevalence trends in non-alcoholic fatty liver disease at the global, regional and national levels, 1990–2017: a population-based observational study
Source: PubMed Central journal article supplement — BMJ Open. 2020 Aug 3;10(8):e036663. doi: 10.1136/bmjopen-2019-036663 (PMC7402189; doi:10.1136/bmjopen-2019-036663), 2020-08-03
Supplement: bmjopen-2019-036663supp002.pdf [file bmjopen-2019-036663supp002.pdf]

S-TABLE. The EAPCs of NAFLD prevalence at the national level, by sex and age.

| location                   | sex    | age              | eapcs | los  | ups  | pvalue |
|----------------------------|--------|------------------|-------|------|------|--------|
| North Korea                | Male   | All Ages         | 1.44  | 1.35 | 1.53 | 0      |
| North Korea                | Male   | 15-49 years      | 0.78  | 0.74 | 0.81 | 0      |
| North Korea                | Male   | 50-69 years      | 0.65  | 0.62 | 0.68 | 0      |
| North Korea                | Male   | 70+ years        | 0.53  | 0.49 | 0.58 | 0      |
| North Korea                | Male   | Age-standardized | 0.58  | 0.55 | 0.61 | 0      |
| North Korea                | Female | All Ages         | 1.62  | 1.57 | 1.67 | 0      |
| North Korea                | Female | 15-49 years      | 1.11  | 1.09 | 1.13 | 0      |
| North Korea                | Female | 50-69 years      | 0.81  | 0.81 | 0.82 | 0      |
| North Korea                | Female | 70+ years        | 0.71  | 0.68 | 0.73 | 0      |
| North Korea                | Female | Age-standardized | 0.75  | 0.73 | 0.77 | 0      |
| North Korea                | Both   | All Ages         | 1.55  | 1.48 | 1.62 | 0      |
| North Korea                | Both   | 15-49 years      | 0.99  | 0.97 | 1.01 | 0      |
| North Korea                | Both   | 50-69 years      | 0.77  | 0.75 | 0.79 | 0      |
| North Korea                | Both   | 70+ years        | 0.68  | 0.64 | 0.71 | 0      |
| Oman                       | Both   | Age-standardized | 2.12  | 1.97 | 2.26 | 0      |
| Taiwan (Province of China) | Male   | All Ages         | 2.3   | 2.25 | 2.36 | 0      |
| Taiwan (Province of China) | Male   | 15-49 years      | 1.48  | 1.42 | 1.54 | 0      |
| Taiwan (Province of China) | Male   | 50-69 years      | 1.12  | 1.08 | 1.15 | 0      |
| Taiwan (Province of China) | Male   | 70+ years        | 0.82  | 0.78 | 0.86 | 0      |
| Taiwan (Province of China) | Male   | Age-standardized | 1.11  | 1.07 | 1.16 | 0      |
| Taiwan (Province of China) | Female | All Ages         | 2.96  | 2.85 | 3.06 | 0      |
| Taiwan (Province of China) | Female | 15-49 years      | 1.93  | 1.83 | 2.03 | 0      |
| Taiwan (Province of China) | Female | 50-69 years      | 1.48  | 1.42 | 1.55 | 0      |
| Taiwan (Province of China) | Female | 70+ years        | 1.24  | 1.15 | 1.32 | 0      |
| Taiwan (Province of China) | Female | Age-standardized | 1.45  | 1.36 | 1.54 | 0      |
| Taiwan (Province of China) | Both   | All Ages         | 2.54  | 2.47 | 2.62 | 0      |
| Taiwan (Province of China) | Both   | 15-49 years      | 1.64  | 1.57 | 1.72 | 0      |
| Taiwan (Province of China) | Both   | 50-69 years      | 1.21  | 1.15 | 1.27 | 0      |
| Taiwan (Province of China) | Both   | 70+ years        | 0.91  | 0.85 | 0.97 | 0      |
| Finland                    | Both   | Age-standardized | 1.72  | 1.56 | 1.87 | 0      |
| Armenia                    | Male   | All Ages         | 1.92  | 1.88 | 1.96 | 0      |
| Armenia                    | Male   | 15-49 years      | 1.05  | 0.95 | 1.16 | 0      |
| Armenia                    | Male   | 50-69 years      | 0.41  | 0.29 | 0.54 | 0      |
| Armenia                    | Male   | 70+ years        | 0.87  | 0.8  | 0.94 | 0      |
| Armenia                    | Male   | Age-standardized | 0.8   | 0.72 | 0.88 | 0      |
| Armenia                    | Female | All Ages         | 2.17  | 2.11 | 2.24 | 0      |
| Armenia                    | Female | 15-49 years      | 1.1   | 1.03 | 1.17 | 0      |
| Armenia                    | Female | 50-69 years      | 0.78  | 0.66 | 0.9  | 0      |
| Armenia                    | Female | 70+ years        | 1.24  | 1.19 | 1.29 | 0      |
| Armenia                    | Female | Age-standardized | 1.04  | 0.96 | 1.12 | 0      |
| Armenia                    | Both   | All Ages         | 2.06  | 2    | 2.11 | 0      |
| Armenia                    | Both   | 15-49 years      | 1.08  | 0.99 | 1.17 | 0      |
| Armenia                    | Both   | 50-69 years      | 0.61  | 0.49 | 0.73 | 0      |
| Armenia                    | Both   | 70+ years        | 1.11  | 1.06 | 1.16 | 0      |
| Equatorial Guinea          | Both   | Age-standardized | 1.67  | 1.55 | 1.8  | 0      |
| Andorra                    | Male   | All Ages         | 1.24  | 1.08 | 1.4  | 0      |
| Andorra                    | Male   | 15-49 years      | 1.12  | 0.96 | 1.29 | 0      |
| Andorra                    | Male   | 50-69 years      | 0.82  | 0.72 | 0.91 | 0      |
| Andorra                    | Male   | 70+ years        | 0.49  | 0.41 | 0.57 | 0      |
| Andorra                    | Male   | Age-standardized | 0.84  | 0.74 | 0.94 | 0      |
| Andorra                    | Female | All Ages         | 1.55  | 1.38 | 1.73 | 0      |
| Andorra                    | Female | 15-49 years      | 1.3   | 1.14 | 1.46 | 0      |
| Andorra                    | Female | 50-69 years      | 0.95  | 0.83 | 1.06 | 0      |
| Andorra                    | Female | 70+ years        | 0.78  | 0.66 | 0.91 | 0      |

|                    |        |                  |      |      |      |   |
|--------------------|--------|------------------|------|------|------|---|
| Andorra            | Female | Age-standardized | 0.97 | 0.86 | 1.09 | 0 |
| Andorra            | Both   | All Ages         | 1.27 | 1.11 | 1.44 | 0 |
| Andorra            | Both   | 15-49 years      | 1.08 | 0.93 | 1.23 | 0 |
| Andorra            | Both   | 50-69 years      | 0.85 | 0.73 | 0.98 | 0 |
| Andorra            | Both   | 70+ years        | 0.52 | 0.42 | 0.61 | 0 |
| Nicaragua          | Both   | Age-standardized | 1.61 | 1.53 | 1.69 | 0 |
| Bhutan             | Male   | All Ages         | 2.19 | 2.14 | 2.24 | 0 |
| Bhutan             | Male   | 15-49 years      | 1.37 | 1.32 | 1.42 | 0 |
| Bhutan             | Male   | 50-69 years      | 0.92 | 0.9  | 0.95 | 0 |
| Bhutan             | Male   | 70+ years        | 0.92 | 0.9  | 0.94 | 0 |
| Bhutan             | Male   | Age-standardized | 0.98 | 0.94 | 1.01 | 0 |
| Bhutan             | Female | All Ages         | 2.1  | 2.06 | 2.15 | 0 |
| Bhutan             | Female | 15-49 years      | 1.3  | 1.24 | 1.36 | 0 |
| Bhutan             | Female | 50-69 years      | 1.05 | 1.01 | 1.08 | 0 |
| Bhutan             | Female | 70+ years        | 1.14 | 1.12 | 1.16 | 0 |
| Bhutan             | Female | Age-standardized | 1.09 | 1.06 | 1.11 | 0 |
| Bhutan             | Both   | All Ages         | 2.17 | 2.13 | 2.21 | 0 |
| Bhutan             | Both   | 15-49 years      | 1.38 | 1.33 | 1.42 | 0 |
| Bhutan             | Both   | 50-69 years      | 0.98 | 0.95 | 1    | 0 |
| Bhutan             | Both   | 70+ years        | 1    | 0.96 | 1.04 | 0 |
| Nepal              | Both   | Age-standardized | 1.56 | 1.4  | 1.72 | 0 |
| Dominican Republic | Male   | All Ages         | 2.1  | 2.02 | 2.18 | 0 |
| Dominican Republic | Male   | 15-49 years      | 1.34 | 1.27 | 1.42 | 0 |
| Dominican Republic | Male   | 50-69 years      | 0.92 | 0.84 | 1    | 0 |
| Dominican Republic | Male   | 70+ years        | 0.72 | 0.64 | 0.81 | 0 |
| Dominican Republic | Male   | Age-standardized | 0.97 | 0.89 | 1.05 | 0 |
| Dominican Republic | Female | All Ages         | 2.26 | 2.24 | 2.29 | 0 |
| Dominican Republic | Female | 15-49 years      | 1.46 | 1.4  | 1.51 | 0 |
| Dominican Republic | Female | 50-69 years      | 1.08 | 1.05 | 1.1  | 0 |
| Dominican Republic | Female | 70+ years        | 0.97 | 0.94 | 1    | 0 |
| Dominican Republic | Female | Age-standardized | 1.1  | 1.08 | 1.12 | 0 |
| Dominican Republic | Both   | All Ages         | 2.19 | 2.14 | 2.24 | 0 |
| Dominican Republic | Both   | 15-49 years      | 1.45 | 1.4  | 1.49 | 0 |
| Dominican Republic | Both   | 50-69 years      | 0.99 | 0.95 | 1.03 | 0 |
| Dominican Republic | Both   | 70+ years        | 0.81 | 0.76 | 0.86 | 0 |
| Benin              | Both   | Age-standardized | 1.53 | 1.45 | 1.61 | 0 |
| Samoa              | Male   | All Ages         | 1.32 | 1.26 | 1.38 | 0 |
| Samoa              | Male   | 15-49 years      | 1.18 | 1.07 | 1.28 | 0 |
| Samoa              | Male   | 50-69 years      | 0.67 | 0.63 | 0.71 | 0 |
| Samoa              | Male   | 70+ years        | 0.59 | 0.55 | 0.63 | 0 |
| Samoa              | Male   | Age-standardized | 0.78 | 0.74 | 0.82 | 0 |
| Samoa              | Female | All Ages         | 1.6  | 1.5  | 1.7  | 0 |
| Samoa              | Female | 15-49 years      | 1.37 | 1.23 | 1.51 | 0 |
| Samoa              | Female | 50-69 years      | 1.06 | 1    | 1.11 | 0 |
| Samoa              | Female | 70+ years        | 0.88 | 0.78 | 0.98 | 0 |
| Samoa              | Female | Age-standardized | 1.07 | 1.01 | 1.14 | 0 |
| Samoa              | Both   | All Ages         | 1.44 | 1.37 | 1.52 | 0 |
| Samoa              | Both   | 15-49 years      | 1.26 | 1.14 | 1.38 | 0 |
| Samoa              | Both   | 50-69 years      | 0.86 | 0.81 | 0.9  | 0 |
| Samoa              | Both   | 70+ years        | 0.74 | 0.67 | 0.81 | 0 |
| Maldives           | Both   | Age-standardized | 1.51 | 1.45 | 1.56 | 0 |
| Malaysia           | Male   | All Ages         | 2.21 | 2.16 | 2.27 | 0 |
| Malaysia           | Male   | 15-49 years      | 1.32 | 1.28 | 1.35 | 0 |
| Malaysia           | Male   | 50-69 years      | 1.13 | 1.09 | 1.18 | 0 |
| Malaysia           | Male   | 70+ years        | 0.94 | 0.9  | 0.97 | 0 |
| Malaysia           | Male   | Age-standardized | 1.16 | 1.12 | 1.2  | 0 |

|          |        |                  |      |      |      |   |
|----------|--------|------------------|------|------|------|---|
| Malaysia | Female | All Ages         | 2.24 | 2.2  | 2.27 | 0 |
| Malaysia | Female | 15-49 years      | 1.34 | 1.29 | 1.39 | 0 |
| Malaysia | Female | 50-69 years      | 1.26 | 1.23 | 1.29 | 0 |
| Malaysia | Female | 70+ years        | 1.18 | 1.14 | 1.23 | 0 |
| Malaysia | Female | Age-standardized | 1.23 | 1.19 | 1.26 | 0 |
| Malaysia | Both   | All Ages         | 2.24 | 2.2  | 2.28 | 0 |
| Malaysia | Both   | 15-49 years      | 1.36 | 1.32 | 1.39 | 0 |
| Malaysia | Both   | 50-69 years      | 1.2  | 1.16 | 1.23 | 0 |
| Malaysia | Both   | 70+ years        | 1.08 | 1.04 | 1.12 | 0 |
| Iceland  | Both   | Age-standardized | 1.46 | 1.35 | 1.56 | 0 |
| Malta    | Male   | All Ages         | 2.12 | 1.95 | 2.29 | 0 |
| Malta    | Male   | 15-49 years      | 1.38 | 1.24 | 1.52 | 0 |
| Malta    | Male   | 50-69 years      | 1.26 | 1.12 | 1.4  | 0 |
| Malta    | Male   | 70+ years        | 1    | 0.85 | 1.15 | 0 |
| Malta    | Male   | Age-standardized | 1.29 | 1.13 | 1.46 | 0 |
| Malta    | Female | All Ages         | 2.46 | 2.28 | 2.64 | 0 |
| Malta    | Female | 15-49 years      | 1.5  | 1.37 | 1.64 | 0 |
| Malta    | Female | 50-69 years      | 1.59 | 1.43 | 1.74 | 0 |
| Malta    | Female | 70+ years        | 1.47 | 1.27 | 1.66 | 0 |
| Malta    | Female | Age-standardized | 1.52 | 1.34 | 1.69 | 0 |
| Malta    | Both   | All Ages         | 2.25 | 2.08 | 2.43 | 0 |
| Malta    | Both   | 15-49 years      | 1.45 | 1.31 | 1.59 | 0 |
| Malta    | Both   | 50-69 years      | 1.48 | 1.32 | 1.63 | 0 |
| Malta    | Both   | 70+ years        | 1.23 | 1.08 | 1.39 | 0 |
| Germany  | Both   | Age-standardized | 1.45 | 1.32 | 1.57 | 0 |
| Colombia | Male   | All Ages         | 2.17 | 2.14 | 2.21 | 0 |
| Colombia | Male   | 15-49 years      | 1.37 | 1.31 | 1.44 | 0 |
| Colombia | Male   | 50-69 years      | 1.05 | 1    | 1.1  | 0 |
| Colombia | Male   | 70+ years        | 0.85 | 0.79 | 0.9  | 0 |
| Colombia | Male   | Age-standardized | 1.12 | 1.07 | 1.17 | 0 |
| Colombia | Female | All Ages         | 2.53 | 2.48 | 2.57 | 0 |
| Colombia | Female | 15-49 years      | 1.6  | 1.5  | 1.69 | 0 |
| Colombia | Female | 50-69 years      | 1.24 | 1.19 | 1.29 | 0 |
| Colombia | Female | 70+ years        | 1.12 | 1.07 | 1.17 | 0 |
| Colombia | Female | Age-standardized | 1.29 | 1.23 | 1.34 | 0 |
| Colombia | Both   | All Ages         | 2.34 | 2.3  | 2.37 | 0 |
| Colombia | Both   | 15-49 years      | 1.48 | 1.41 | 1.56 | 0 |
| Colombia | Both   | 50-69 years      | 1.12 | 1.07 | 1.17 | 0 |
| Colombia | Both   | 70+ years        | 0.97 | 0.92 | 1.02 | 0 |
| Malta    | Both   | Age-standardized | 1.42 | 1.25 | 1.59 | 0 |
| Iceland  | Male   | All Ages         | 1.9  | 1.78 | 2.01 | 0 |
| Iceland  | Male   | 15-49 years      | 1.53 | 1.42 | 1.64 | 0 |
| Iceland  | Male   | 50-69 years      | 1.3  | 1.22 | 1.38 | 0 |
| Iceland  | Male   | 70+ years        | 1.06 | 0.97 | 1.15 | 0 |
| Iceland  | Male   | Age-standardized | 1.38 | 1.29 | 1.47 | 0 |
| Iceland  | Female | All Ages         | 2.08 | 1.96 | 2.2  | 0 |
| Iceland  | Female | 15-49 years      | 1.68 | 1.56 | 1.8  | 0 |
| Iceland  | Female | 50-69 years      | 1.46 | 1.36 | 1.55 | 0 |
| Iceland  | Female | 70+ years        | 1.4  | 1.24 | 1.57 | 0 |
| Iceland  | Female | Age-standardized | 1.55 | 1.43 | 1.67 | 0 |
| Iceland  | Both   | All Ages         | 1.96 | 1.84 | 2.08 | 0 |
| Iceland  | Both   | 15-49 years      | 1.58 | 1.46 | 1.7  | 0 |
| Iceland  | Both   | 50-69 years      | 1.39 | 1.29 | 1.48 | 0 |
| Iceland  | Both   | 70+ years        | 1.25 | 1.13 | 1.37 | 0 |
| Thailand | Both   | Age-standardized | 1.39 | 1.35 | 1.43 | 0 |
| Spain    | Male   | All Ages         | 1.73 | 1.51 | 1.94 | 0 |

|                                  |        |                  |      |      |      |   |
|----------------------------------|--------|------------------|------|------|------|---|
| Spain                            | Male   | 15-49 years      | 1.69 | 1.53 | 1.86 | 0 |
| Spain                            | Male   | 50-69 years      | 1.11 | 0.97 | 1.24 | 0 |
| Spain                            | Male   | 70+ years        | 0.88 | 0.75 | 1.01 | 0 |
| Spain                            | Male   | Age-standardized | 1.16 | 1.02 | 1.29 | 0 |
| Spain                            | Female | All Ages         | 1.67 | 1.47 | 1.87 | 0 |
| Spain                            | Female | 15-49 years      | 1.6  | 1.45 | 1.75 | 0 |
| Spain                            | Female | 50-69 years      | 1    | 0.88 | 1.12 | 0 |
| Spain                            | Female | 70+ years        | 0.99 | 0.84 | 1.15 | 0 |
| Spain                            | Female | Age-standardized | 1.1  | 0.97 | 1.23 | 0 |
| Spain                            | Both   | All Ages         | 1.7  | 1.5  | 1.91 | 0 |
| Spain                            | Both   | 15-49 years      | 1.67 | 1.51 | 1.83 | 0 |
| Spain                            | Both   | 50-69 years      | 1.07 | 0.94 | 1.2  | 0 |
| Spain                            | Both   | 70+ years        | 0.95 | 0.81 | 1.1  | 0 |
| Israel                           | Both   | Age-standardized | 1.36 | 1.24 | 1.48 | 0 |
| China                            | Male   | All Ages         | 2.08 | 2.03 | 2.12 | 0 |
| China                            | Male   | 15-49 years      | 1.24 | 1.11 | 1.36 | 0 |
| China                            | Male   | 50-69 years      | 0.82 | 0.74 | 0.9  | 0 |
| China                            | Male   | 70+ years        | 0.67 | 0.61 | 0.74 | 0 |
| China                            | Male   | Age-standardized | 0.8  | 0.73 | 0.88 | 0 |
| China                            | Female | All Ages         | 2.44 | 2.39 | 2.49 | 0 |
| China                            | Female | 15-49 years      | 1.51 | 1.38 | 1.64 | 0 |
| China                            | Female | 50-69 years      | 1.07 | 1.01 | 1.13 | 0 |
| China                            | Female | 70+ years        | 0.9  | 0.85 | 0.95 | 0 |
| China                            | Female | Age-standardized | 1    | 0.94 | 1.05 | 0 |
| China                            | Both   | All Ages         | 2.22 | 2.17 | 2.27 | 0 |
| China                            | Both   | 15-49 years      | 1.34 | 1.21 | 1.47 | 0 |
| China                            | Both   | 50-69 years      | 0.91 | 0.84 | 0.98 | 0 |
| China                            | Both   | 70+ years        | 0.81 | 0.75 | 0.87 | 0 |
| Bolivia                          | Both   | Age-standardized | 1.35 | 1.26 | 1.43 | 0 |
| Brunei                           | Male   | All Ages         | 1.98 | 1.94 | 2.02 | 0 |
| Brunei                           | Male   | 15-49 years      | 1.23 | 1.16 | 1.3  | 0 |
| Brunei                           | Male   | 50-69 years      | 1.08 | 1.02 | 1.14 | 0 |
| Brunei                           | Male   | 70+ years        | 0.86 | 0.82 | 0.9  | 0 |
| Brunei                           | Male   | Age-standardized | 1.09 | 1.03 | 1.16 | 0 |
| Brunei                           | Female | All Ages         | 2.6  | 2.51 | 2.69 | 0 |
| Brunei                           | Female | 15-49 years      | 1.57 | 1.45 | 1.69 | 0 |
| Brunei                           | Female | 50-69 years      | 1.32 | 1.22 | 1.42 | 0 |
| Brunei                           | Female | 70+ years        | 1.26 | 1.17 | 1.35 | 0 |
| Brunei                           | Female | Age-standardized | 1.36 | 1.25 | 1.47 | 0 |
| Brunei                           | Both   | All Ages         | 2.15 | 2.1  | 2.19 | 0 |
| Brunei                           | Both   | 15-49 years      | 1.3  | 1.25 | 1.35 | 0 |
| Brunei                           | Both   | 50-69 years      | 1.11 | 1.04 | 1.18 | 0 |
| Brunei                           | Both   | 70+ years        | 0.93 | 0.88 | 0.97 | 0 |
| Saint Vincent and the Grenadines | Both   | Age-standardized | 1.35 | 1.26 | 1.43 | 0 |
| Morocco                          | Male   | All Ages         | 2.39 | 2.34 | 2.44 | 0 |
| Morocco                          | Male   | 15-49 years      | 1.68 | 1.66 | 1.7  | 0 |
| Morocco                          | Male   | 50-69 years      | 1.26 | 1.24 | 1.29 | 0 |
| Morocco                          | Male   | 70+ years        | 1.12 | 1.1  | 1.14 | 0 |
| Morocco                          | Male   | Age-standardized | 1.31 | 1.29 | 1.33 | 0 |
| Morocco                          | Female | All Ages         | 2.38 | 2.34 | 2.43 | 0 |
| Morocco                          | Female | 15-49 years      | 1.67 | 1.63 | 1.71 | 0 |
| Morocco                          | Female | 50-69 years      | 1.23 | 1.21 | 1.25 | 0 |
| Morocco                          | Female | 70+ years        | 1.12 | 1.11 | 1.13 | 0 |
| Morocco                          | Female | Age-standardized | 1.27 | 1.24 | 1.29 | 0 |
| Morocco                          | Both   | All Ages         | 2.39 | 2.34 | 2.44 | 0 |
| Morocco                          | Both   | 15-49 years      | 1.68 | 1.64 | 1.71 | 0 |

|             |        |                  |      |      |      |   |
|-------------|--------|------------------|------|------|------|---|
| Morocco     | Both   | 50-69 years      | 1.28 | 1.25 | 1.31 | 0 |
| Morocco     | Both   | 70+ years        | 1.06 | 1.04 | 1.07 | 0 |
| El Salvador | Both   | Age-standardized | 1.33 | 1.2  | 1.46 | 0 |
| Lithuania   | Male   | All Ages         | 1.54 | 1.47 | 1.61 | 0 |
| Lithuania   | Male   | 15-49 years      | 0.9  | 0.86 | 0.94 | 0 |
| Lithuania   | Male   | 50-69 years      | 0.36 | 0.33 | 0.4  | 0 |
| Lithuania   | Male   | 70+ years        | 0.6  | 0.52 | 0.67 | 0 |
| Lithuania   | Male   | Age-standardized | 0.61 | 0.57 | 0.65 | 0 |
| Lithuania   | Female | All Ages         | 2.3  | 2.19 | 2.41 | 0 |
| Lithuania   | Female | 15-49 years      | 1.16 | 1.1  | 1.22 | 0 |
| Lithuania   | Female | 50-69 years      | 1    | 0.93 | 1.07 | 0 |
| Lithuania   | Female | 70+ years        | 1.44 | 1.34 | 1.55 | 0 |
| Lithuania   | Female | Age-standardized | 1.13 | 1.06 | 1.2  | 0 |
| Lithuania   | Both   | All Ages         | 1.81 | 1.73 | 1.9  | 0 |
| Lithuania   | Both   | 15-49 years      | 1    | 0.95 | 1.04 | 0 |
| Lithuania   | Both   | 50-69 years      | 0.66 | 0.62 | 0.7  | 0 |
| Lithuania   | Both   | 70+ years        | 1.04 | 0.95 | 1.13 | 0 |
| Ghana       | Both   | Age-standardized | 1.33 | 1.29 | 1.38 | 0 |
| Botswana    | Male   | All Ages         | 2.4  | 2.33 | 2.46 | 0 |
| Botswana    | Male   | 15-49 years      | 1.65 | 1.56 | 1.74 | 0 |
| Botswana    | Male   | 50-69 years      | 1.12 | 1.08 | 1.16 | 0 |
| Botswana    | Male   | 70+ years        | 1.04 | 1.01 | 1.08 | 0 |
| Botswana    | Male   | Age-standardized | 1.21 | 1.18 | 1.25 | 0 |
| Botswana    | Female | All Ages         | 2.17 | 2.12 | 2.21 | 0 |
| Botswana    | Female | 15-49 years      | 1.43 | 1.36 | 1.51 | 0 |
| Botswana    | Female | 50-69 years      | 0.97 | 0.92 | 1.01 | 0 |
| Botswana    | Female | 70+ years        | 1.09 | 1.04 | 1.14 | 0 |
| Botswana    | Female | Age-standardized | 1.06 | 1.02 | 1.1  | 0 |
| Botswana    | Both   | All Ages         | 2.34 | 2.28 | 2.4  | 0 |
| Botswana    | Both   | 15-49 years      | 1.64 | 1.55 | 1.72 | 0 |
| Botswana    | Both   | 50-69 years      | 1.02 | 0.97 | 1.06 | 0 |
| Botswana    | Both   | 70+ years        | 1.04 | 0.96 | 1.13 | 0 |
| Venezuela   | Both   | Age-standardized | 1.32 | 1.25 | 1.39 | 0 |
| Gabon       | Male   | All Ages         | 1.75 | 1.69 | 1.8  | 0 |
| Gabon       | Male   | 15-49 years      | 1.34 | 1.28 | 1.41 | 0 |
| Gabon       | Male   | 50-69 years      | 1.08 | 1.04 | 1.12 | 0 |
| Gabon       | Male   | 70+ years        | 1.02 | 0.98 | 1.07 | 0 |
| Gabon       | Male   | Age-standardized | 1.18 | 1.12 | 1.24 | 0 |
| Gabon       | Female | All Ages         | 1.66 | 1.59 | 1.73 | 0 |
| Gabon       | Female | 15-49 years      | 1.43 | 1.37 | 1.5  | 0 |
| Gabon       | Female | 50-69 years      | 1.08 | 1.03 | 1.13 | 0 |
| Gabon       | Female | 70+ years        | 1.29 | 1.22 | 1.37 | 0 |
| Gabon       | Female | Age-standardized | 1.22 | 1.15 | 1.28 | 0 |
| Gabon       | Both   | All Ages         | 1.69 | 1.64 | 1.75 | 0 |
| Gabon       | Both   | 15-49 years      | 1.32 | 1.26 | 1.38 | 0 |
| Gabon       | Both   | 50-69 years      | 1.2  | 1.14 | 1.26 | 0 |
| Gabon       | Both   | 70+ years        | 1.12 | 1.07 | 1.18 | 0 |
| Algeria     | Both   | Age-standardized | 1.31 | 1.23 | 1.4  | 0 |
| Seychelles  | Male   | All Ages         | 2.15 | 2.09 | 2.22 | 0 |
| Seychelles  | Male   | 15-49 years      | 1.57 | 1.52 | 1.62 | 0 |
| Seychelles  | Male   | 50-69 years      | 0.96 | 0.92 | 1    | 0 |
| Seychelles  | Male   | 70+ years        | 0.81 | 0.78 | 0.83 | 0 |
| Seychelles  | Male   | Age-standardized | 1.05 | 1.01 | 1.09 | 0 |
| Seychelles  | Female | All Ages         | 2.26 | 2.19 | 2.32 | 0 |
| Seychelles  | Female | 15-49 years      | 1.9  | 1.82 | 1.99 | 0 |
| Seychelles  | Female | 50-69 years      | 1.22 | 1.19 | 1.24 | 0 |

|              |        |                  |       |       |      |       |
|--------------|--------|------------------|-------|-------|------|-------|
| Seychelles   | Female | 70+ years        | 1.11  | 1.07  | 1.15 | 0     |
| Seychelles   | Female | Age-standardized | 1.25  | 1.22  | 1.28 | 0     |
| Seychelles   | Both   | All Ages         | 2.22  | 2.16  | 2.27 | 0     |
| Seychelles   | Both   | 15-49 years      | 1.74  | 1.68  | 1.8  | 0     |
| Seychelles   | Both   | 50-69 years      | 1.11  | 1.08  | 1.14 | 0     |
| Seychelles   | Both   | 70+ years        | 0.99  | 0.95  | 1.02 | 0     |
| Honduras     | Both   | Age-standardized | 1.3   | 1.21  | 1.38 | 0     |
| Montenegro   | Male   | All Ages         | 1.12  | 1.08  | 1.15 | 0     |
| Montenegro   | Male   | 15-49 years      | 0.57  | 0.49  | 0.65 | 0     |
| Montenegro   | Male   | 50-69 years      | -0.05 | -0.15 | 0.04 | 0.239 |
| Montenegro   | Male   | 70+ years        | 0.29  | 0.25  | 0.32 | 0     |
| Montenegro   | Male   | Age-standardized | 0.25  | 0.16  | 0.33 | 0     |
| Montenegro   | Female | All Ages         | 1.62  | 1.54  | 1.7  | 0     |
| Montenegro   | Female | 15-49 years      | 0.79  | 0.71  | 0.88 | 0     |
| Montenegro   | Female | 50-69 years      | 0.62  | 0.55  | 0.7  | 0     |
| Montenegro   | Female | 70+ years        | 0.88  | 0.75  | 1    | 0     |
| Montenegro   | Female | Age-standardized | 0.66  | 0.55  | 0.76 | 0     |
| Montenegro   | Both   | All Ages         | 1.32  | 1.26  | 1.37 | 0     |
| Montenegro   | Both   | 15-49 years      | 0.63  | 0.55  | 0.72 | 0     |
| Montenegro   | Both   | 50-69 years      | 0.26  | 0.18  | 0.34 | 0     |
| Montenegro   | Both   | 70+ years        | 0.64  | 0.56  | 0.71 | 0     |
| Turkmenistan | Both   | Age-standardized | 1.3   | 1.23  | 1.37 | 0     |
| Albania      | Male   | All Ages         | 2.39  | 2.32  | 2.45 | 0     |
| Albania      | Male   | 15-49 years      | 0.78  | 0.75  | 0.81 | 0     |
| Albania      | Male   | 50-69 years      | 0.47  | 0.4   | 0.54 | 0     |
| Albania      | Male   | 70+ years        | 0.64  | 0.59  | 0.69 | 0     |
| Albania      | Male   | Age-standardized | 0.6   | 0.58  | 0.62 | 0     |
| Albania      | Female | All Ages         | 2.86  | 2.75  | 2.98 | 0     |
| Albania      | Female | 15-49 years      | 1.21  | 1.15  | 1.27 | 0     |
| Albania      | Female | 50-69 years      | 1     | 0.97  | 1.03 | 0     |
| Albania      | Female | 70+ years        | 1.34  | 1.29  | 1.4  | 0     |
| Albania      | Female | Age-standardized | 1.01  | 0.95  | 1.06 | 0     |
| Albania      | Both   | All Ages         | 2.59  | 2.5   | 2.67 | 0     |
| Albania      | Both   | 15-49 years      | 0.96  | 0.92  | 0.99 | 0     |
| Albania      | Both   | 50-69 years      | 0.67  | 0.64  | 0.71 | 0     |
| Albania      | Both   | 70+ years        | 1.09  | 1.03  | 1.15 | 0     |
| Morocco      | Both   | Age-standardized | 1.29  | 1.27  | 1.32 | 0     |
| Austria      | Male   | All Ages         | 1.41  | 1.3   | 1.52 | 0     |
| Austria      | Male   | 15-49 years      | 1.12  | 0.97  | 1.28 | 0     |
| Austria      | Male   | 50-69 years      | 0.92  | 0.81  | 1.04 | 0     |
| Austria      | Male   | 70+ years        | 0.66  | 0.57  | 0.76 | 0     |
| Austria      | Male   | Age-standardized | 0.94  | 0.83  | 1.05 | 0     |
| Austria      | Female | All Ages         | 1.4   | 1.29  | 1.52 | 0     |
| Austria      | Female | 15-49 years      | 1.29  | 1.12  | 1.45 | 0     |
| Austria      | Female | 50-69 years      | 1.07  | 0.96  | 1.19 | 0     |
| Austria      | Female | 70+ years        | 0.84  | 0.73  | 0.95 | 0     |
| Austria      | Female | Age-standardized | 1.09  | 0.97  | 1.22 | 0     |
| Austria      | Both   | All Ages         | 1.43  | 1.32  | 1.54 | 0     |
| Austria      | Both   | 15-49 years      | 1.16  | 1     | 1.31 | 0     |
| Austria      | Both   | 50-69 years      | 1.04  | 0.91  | 1.17 | 0     |
| Austria      | Both   | 70+ years        | 0.98  | 0.88  | 1.07 | 0     |
| Grenada      | Both   | Age-standardized | 1.29  | 1.22  | 1.37 | 0     |
| Maldives     | Male   | All Ages         | 3.42  | 3.27  | 3.57 | 0     |
| Maldives     | Male   | 15-49 years      | 2     | 1.88  | 2.11 | 0     |
| Maldives     | Male   | 50-69 years      | 1.35  | 1.29  | 1.4  | 0     |
| Maldives     | Male   | 70+ years        | 1.06  | 1.02  | 1.11 | 0     |

|           |        |                  |      |       |      |       |
|-----------|--------|------------------|------|-------|------|-------|
| Maldives  | Male   | Age-standardized | 1.41 | 1.36  | 1.46 | 0     |
| Maldives  | Female | All Ages         | 3.71 | 3.58  | 3.83 | 0     |
| Maldives  | Female | 15-49 years      | 2.22 | 2.07  | 2.37 | 0     |
| Maldives  | Female | 50-69 years      | 1.61 | 1.57  | 1.64 | 0     |
| Maldives  | Female | 70+ years        | 1.37 | 1.33  | 1.41 | 0     |
| Maldives  | Female | Age-standardized | 1.59 | 1.53  | 1.65 | 0     |
| Maldives  | Both   | All Ages         | 3.61 | 3.46  | 3.77 | 0     |
| Maldives  | Both   | 15-49 years      | 2.21 | 2.05  | 2.38 | 0     |
| Maldives  | Both   | 50-69 years      | 1.42 | 1.38  | 1.45 | 0     |
| Maldives  | Both   | 70+ years        | 1.07 | 1.04  | 1.1  | 0     |
| Peru      | Both   | Age-standardized | 1.28 | 1.24  | 1.32 | 0     |
| Belarus   | Male   | All Ages         | 1.1  | 1.04  | 1.15 | 0     |
| Belarus   | Male   | 15-49 years      | 0.74 | 0.59  | 0.89 | 0     |
| Belarus   | Male   | 50-69 years      | 0.08 | -0.05 | 0.21 | 0.235 |
| Belarus   | Male   | 70+ years        | 0.32 | 0.3   | 0.35 | 0     |
| Belarus   | Male   | Age-standardized | 0.42 | 0.31  | 0.52 | 0     |
| Belarus   | Female | All Ages         | 1.5  | 1.42  | 1.58 | 0     |
| Belarus   | Female | 15-49 years      | 0.99 | 0.87  | 1.12 | 0     |
| Belarus   | Female | 50-69 years      | 0.46 | 0.33  | 0.59 | 0     |
| Belarus   | Female | 70+ years        | 1.06 | 0.95  | 1.17 | 0     |
| Belarus   | Female | Age-standardized | 0.83 | 0.72  | 0.94 | 0     |
| Belarus   | Both   | All Ages         | 1.25 | 1.19  | 1.31 | 0     |
| Belarus   | Both   | 15-49 years      | 0.82 | 0.68  | 0.96 | 0     |
| Belarus   | Both   | 50-69 years      | 0.28 | 0.15  | 0.41 | 0     |
| Belarus   | Both   | 70+ years        | 0.8  | 0.75  | 0.84 | 0     |
| Djibouti  | Both   | Age-standardized | 1.28 | 1.23  | 1.33 | 0     |
| Palestine | Male   | All Ages         | 1.84 | 1.8   | 1.88 | 0     |
| Palestine | Male   | 15-49 years      | 1.18 | 1.06  | 1.3  | 0     |
| Palestine | Male   | 50-69 years      | 0.82 | 0.74  | 0.9  | 0     |
| Palestine | Male   | 70+ years        | 0.72 | 0.6   | 0.84 | 0     |
| Palestine | Male   | Age-standardized | 0.87 | 0.77  | 0.97 | 0     |
| Palestine | Female | All Ages         | 1.61 | 1.55  | 1.68 | 0     |
| Palestine | Female | 15-49 years      | 1.13 | 1.04  | 1.23 | 0     |
| Palestine | Female | 50-69 years      | 0.87 | 0.76  | 0.98 | 0     |
| Palestine | Female | 70+ years        | 0.82 | 0.68  | 0.96 | 0     |
| Palestine | Female | Age-standardized | 0.9  | 0.78  | 1.01 | 0     |
| Palestine | Both   | All Ages         | 1.76 | 1.72  | 1.8  | 0     |
| Palestine | Both   | 15-49 years      | 1.16 | 1.05  | 1.28 | 0     |
| Palestine | Both   | 50-69 years      | 0.99 | 0.89  | 1.08 | 0     |
| Palestine | Both   | 70+ years        | 0.68 | 0.58  | 0.79 | 0     |
| Bahrain   | Both   | Age-standardized | 1.27 | 1.23  | 1.31 | 0     |
| Australia | Male   | All Ages         | 1.54 | 1.4   | 1.69 | 0     |
| Australia | Male   | 15-49 years      | 1.26 | 1.11  | 1.42 | 0     |
| Australia | Male   | 50-69 years      | 1.08 | 0.97  | 1.19 | 0     |
| Australia | Male   | 70+ years        | 0.73 | 0.63  | 0.82 | 0     |
| Australia | Male   | Age-standardized | 1.14 | 1.01  | 1.27 | 0     |
| Australia | Female | All Ages         | 1.63 | 1.5   | 1.76 | 0     |
| Australia | Female | 15-49 years      | 1.38 | 1.27  | 1.49 | 0     |
| Australia | Female | 50-69 years      | 1.03 | 0.93  | 1.13 | 0     |
| Australia | Female | 70+ years        | 0.85 | 0.72  | 0.97 | 0     |
| Australia | Female | Age-standardized | 1.17 | 1.06  | 1.27 | 0     |
| Australia | Both   | All Ages         | 1.57 | 1.43  | 1.71 | 0     |
| Australia | Both   | 15-49 years      | 1.28 | 1.15  | 1.42 | 0     |
| Australia | Both   | 50-69 years      | 1.04 | 0.93  | 1.15 | 0     |
| Australia | Both   | 70+ years        | 0.87 | 0.76  | 0.99 | 0     |
| Guatemala | Both   | Age-standardized | 1.27 | 1.23  | 1.31 | 0     |

|                          |        |                  |      |      |      |       |
|--------------------------|--------|------------------|------|------|------|-------|
| Moldova                  | Male   | All Ages         | 1.51 | 1.41 | 1.61 | 0     |
| Moldova                  | Male   | 15-49 years      | 0.84 | 0.66 | 1.03 | 0     |
| Moldova                  | Male   | 50-69 years      | 0.19 | 0.06 | 0.32 | 0.006 |
| Moldova                  | Male   | 70+ years        | 0.33 | 0.25 | 0.41 | 0     |
| Moldova                  | Male   | Age-standardized | 0.52 | 0.38 | 0.65 | 0     |
| Moldova                  | Female | All Ages         | 2.03 | 1.9  | 2.15 | 0     |
| Moldova                  | Female | 15-49 years      | 1.06 | 0.91 | 1.21 | 0     |
| Moldova                  | Female | 50-69 years      | 0.72 | 0.59 | 0.86 | 0     |
| Moldova                  | Female | 70+ years        | 1.12 | 0.98 | 1.27 | 0     |
| Moldova                  | Female | Age-standardized | 1    | 0.86 | 1.13 | 0     |
| Moldova                  | Both   | All Ages         | 1.71 | 1.6  | 1.83 | 0     |
| Moldova                  | Both   | 15-49 years      | 0.96 | 0.79 | 1.14 | 0     |
| Moldova                  | Both   | 50-69 years      | 0.44 | 0.31 | 0.57 | 0     |
| Moldova                  | Both   | 70+ years        | 0.74 | 0.63 | 0.85 | 0     |
| Moldova                  | Both   | Age-standardized | 1.27 | 1.21 | 1.33 | 0     |
| Costa Rica               | Male   | All Ages         | 2.15 | 2.12 | 2.19 | 0     |
| Costa Rica               | Male   | 15-49 years      | 1.19 | 1.14 | 1.24 | 0     |
| Costa Rica               | Male   | 50-69 years      | 0.83 | 0.77 | 0.88 | 0     |
| Costa Rica               | Male   | 70+ years        | 0.58 | 0.53 | 0.63 | 0     |
| Costa Rica               | Male   | Age-standardized | 0.91 | 0.86 | 0.96 | 0     |
| Costa Rica               | Female | All Ages         | 2.28 | 2.24 | 2.32 | 0     |
| Costa Rica               | Female | 15-49 years      | 1.17 | 1.14 | 1.21 | 0     |
| Costa Rica               | Female | 50-69 years      | 0.85 | 0.83 | 0.87 | 0     |
| Costa Rica               | Female | 70+ years        | 0.75 | 0.71 | 0.8  | 0     |
| Costa Rica               | Female | Age-standardized | 0.92 | 0.89 | 0.96 | 0     |
| Costa Rica               | Both   | All Ages         | 2.17 | 2.13 | 2.2  | 0     |
| Costa Rica               | Both   | 15-49 years      | 1.15 | 1.1  | 1.2  | 0     |
| Costa Rica               | Both   | 50-69 years      | 0.79 | 0.75 | 0.84 | 0     |
| Costa Rica               | Both   | 70+ years        | 0.62 | 0.58 | 0.67 | 0     |
| Costa Rica               | Both   | Age-standardized | 1.26 | 1.14 | 1.37 | 0     |
| France                   | Both   | All Ages         | 1.64 | 1.61 | 1.67 | 0     |
| Low-middle SDI           | Male   | 15-49 years      | 1.25 | 1.24 | 1.25 | 0     |
| Low-middle SDI           | Male   | 50-69 years      | 1.08 | 1.07 | 1.1  | 0     |
| Low-middle SDI           | Male   | 70+ years        | 0.8  | 0.76 | 0.83 | 0     |
| Low-middle SDI           | Male   | Age-standardized | 1.07 | 1.06 | 1.08 | 0     |
| Low-middle SDI           | Female | All Ages         | 1.64 | 1.61 | 1.67 | 0     |
| Low-middle SDI           | Female | 15-49 years      | 1.15 | 1.14 | 1.17 | 0     |
| Low-middle SDI           | Female | 50-69 years      | 0.97 | 0.96 | 0.99 | 0     |
| Low-middle SDI           | Female | 70+ years        | 0.89 | 0.87 | 0.92 | 0     |
| Low-middle SDI           | Female | Age-standardized | 0.97 | 0.95 | 0.98 | 0     |
| Low-middle SDI           | Both   | All Ages         | 1.63 | 1.6  | 1.66 | 0     |
| Low-middle SDI           | Both   | 15-49 years      | 1.2  | 1.19 | 1.21 | 0     |
| Low-middle SDI           | Both   | 50-69 years      | 1.01 | 0.99 | 1.02 | 0     |
| Low-middle SDI           | Both   | 70+ years        | 0.8  | 0.78 | 0.82 | 0     |
| Low-middle SDI           | Both   | Age-standardized | 1.01 | 1    | 1.02 | 0     |
| Northern Mariana Islands | Male   | All Ages         | 1.44 | 1.35 | 1.54 | 0     |
| Northern Mariana Islands | Male   | 15-49 years      | 0.64 | 0.46 | 0.82 | 0     |
| Northern Mariana Islands | Male   | 50-69 years      | 0.49 | 0.43 | 0.56 | 0     |
| Northern Mariana Islands | Male   | 70+ years        | 0.31 | 0.27 | 0.36 | 0     |
| Northern Mariana Islands | Male   | Age-standardized | 0.5  | 0.43 | 0.56 | 0     |
| Northern Mariana Islands | Female | All Ages         | 2.01 | 1.94 | 2.07 | 0     |
| Northern Mariana Islands | Female | 15-49 years      | 1.04 | 0.81 | 1.28 | 0     |
| Northern Mariana Islands | Female | 50-69 years      | 0.67 | 0.63 | 0.71 | 0     |
| Northern Mariana Islands | Female | 70+ years        | 0.44 | 0.39 | 0.49 | 0     |
| Northern Mariana Islands | Female | Age-standardized | 0.65 | 0.6  | 0.7  | 0     |
| Northern Mariana Islands | Both   | All Ages         | 1.69 | 1.6  | 1.77 | 0     |



|                          |        |                  |      |      |      |   |
|--------------------------|--------|------------------|------|------|------|---|
| Northern Mariana Islands | Both   | 15-49 years      | 0.83 | 0.65 | 1.01 | 0 |
| Northern Mariana Islands | Both   | 50-69 years      | 0.5  | 0.45 | 0.54 | 0 |
| Northern Mariana Islands | Both   | 70+ years        | 0.35 | 0.29 | 0.4  | 0 |
| Bosnia and Herzegovina   | Both   | Age-standardized | 1.24 | 1.12 | 1.37 | 0 |
| Poland                   | Male   | All Ages         | 1.68 | 1.65 | 1.71 | 0 |
| Poland                   | Male   | 15-49 years      | 0.99 | 0.88 | 1.1  | 0 |
| Poland                   | Male   | 50-69 years      | 0.39 | 0.3  | 0.48 | 0 |
| Poland                   | Male   | 70+ years        | 0.69 | 0.61 | 0.77 | 0 |
| Poland                   | Male   | Age-standardized | 0.73 | 0.7  | 0.76 | 0 |
| Poland                   | Female | All Ages         | 2.04 | 2.01 | 2.08 | 0 |
| Poland                   | Female | 15-49 years      | 1.11 | 1.02 | 1.2  | 0 |
| Poland                   | Female | 50-69 years      | 0.88 | 0.72 | 1.04 | 0 |
| Poland                   | Female | 70+ years        | 1.14 | 1.1  | 1.17 | 0 |
| Poland                   | Female | Age-standardized | 1.07 | 1.02 | 1.11 | 0 |
| Poland                   | Both   | All Ages         | 1.82 | 1.79 | 1.85 | 0 |
| Poland                   | Both   | 15-49 years      | 1.04 | 0.94 | 1.14 | 0 |
| Poland                   | Both   | 50-69 years      | 0.63 | 0.52 | 0.74 | 0 |
| Poland                   | Both   | 70+ years        | 0.96 | 0.91 | 1    | 0 |
| Suriname                 | Both   | Age-standardized | 1.24 | 1.18 | 1.29 | 0 |
| Romania                  | Male   | All Ages         | 1.44 | 1.39 | 1.48 | 0 |
| Romania                  | Male   | 15-49 years      | 1.11 | 1.05 | 1.17 | 0 |
| Romania                  | Male   | 50-69 years      | 0.3  | 0.21 | 0.39 | 0 |
| Romania                  | Male   | 70+ years        | 0.63 | 0.54 | 0.72 | 0 |
| Romania                  | Male   | Age-standardized | 0.59 | 0.57 | 0.61 | 0 |
| Romania                  | Female | All Ages         | 2.23 | 2.17 | 2.29 | 0 |
| Romania                  | Female | 15-49 years      | 1.48 | 1.46 | 1.5  | 0 |
| Romania                  | Female | 50-69 years      | 1.22 | 1.13 | 1.3  | 0 |
| Romania                  | Female | 70+ years        | 1.29 | 1.22 | 1.36 | 0 |
| Romania                  | Female | Age-standardized | 1.19 | 1.15 | 1.23 | 0 |
| Romania                  | Both   | All Ages         | 1.76 | 1.71 | 1.81 | 0 |
| Romania                  | Both   | 15-49 years      | 1.26 | 1.22 | 1.3  | 0 |
| Romania                  | Both   | 50-69 years      | 0.69 | 0.61 | 0.77 | 0 |
| Romania                  | Both   | 70+ years        | 0.95 | 0.87 | 1.03 | 0 |
| United Arab Emirates     | Both   | Age-standardized | 1.24 | 1.2  | 1.29 | 0 |
| Bahrain                  | Male   | All Ages         | 2.41 | 2.31 | 2.52 | 0 |
| Bahrain                  | Male   | 15-49 years      | 1.6  | 1.52 | 1.68 | 0 |
| Bahrain                  | Male   | 50-69 years      | 1.04 | 1.02 | 1.06 | 0 |
| Bahrain                  | Male   | 70+ years        | 0.87 | 0.84 | 0.91 | 0 |
| Bahrain                  | Male   | Age-standardized | 1.14 | 1.12 | 1.16 | 0 |
| Bahrain                  | Female | All Ages         | 2.68 | 2.6  | 2.77 | 0 |
| Bahrain                  | Female | 15-49 years      | 1.84 | 1.8  | 1.89 | 0 |
| Bahrain                  | Female | 50-69 years      | 1.31 | 1.26 | 1.35 | 0 |
| Bahrain                  | Female | 70+ years        | 1.17 | 1.1  | 1.23 | 0 |
| Bahrain                  | Female | Age-standardized | 1.35 | 1.3  | 1.41 | 0 |
| Bahrain                  | Both   | All Ages         | 2.62 | 2.5  | 2.74 | 0 |
| Bahrain                  | Both   | 15-49 years      | 1.77 | 1.69 | 1.86 | 0 |
| Bahrain                  | Both   | 50-69 years      | 1.28 | 1.24 | 1.32 | 0 |
| Bahrain                  | Both   | 70+ years        | 0.9  | 0.87 | 0.93 | 0 |
| Saudi Arabia             | Both   | Age-standardized | 1.23 | 1.15 | 1.31 | 0 |
| Panama                   | Male   | All Ages         | 1.93 | 1.87 | 1.99 | 0 |
| Panama                   | Male   | 15-49 years      | 1.45 | 1.38 | 1.52 | 0 |
| Panama                   | Male   | 50-69 years      | 1.12 | 1.07 | 1.17 | 0 |
| Panama                   | Male   | 70+ years        | 0.92 | 0.87 | 0.96 | 0 |
| Panama                   | Male   | Age-standardized | 1.15 | 1.1  | 1.19 | 0 |
| Panama                   | Female | All Ages         | 2.22 | 2.14 | 2.3  | 0 |
| Panama                   | Female | 15-49 years      | 1.65 | 1.56 | 1.75 | 0 |

|                            |        |                  |      |      |      |   |
|----------------------------|--------|------------------|------|------|------|---|
| Panama                     | Female | 50-69 years      | 1.33 | 1.27 | 1.39 | 0 |
| Panama                     | Female | 70+ years        | 1.15 | 1.1  | 1.21 | 0 |
| Panama                     | Female | Age-standardized | 1.33 | 1.27 | 1.4  | 0 |
| Panama                     | Both   | All Ages         | 2.05 | 1.98 | 2.12 | 0 |
| Panama                     | Both   | 15-49 years      | 1.54 | 1.46 | 1.61 | 0 |
| Panama                     | Both   | 50-69 years      | 1.2  | 1.15 | 1.25 | 0 |
| Panama                     | Both   | 70+ years        | 1    | 0.96 | 1.05 | 0 |
| Taiwan (Province of China) | Both   | Age-standardized | 1.22 | 1.16 | 1.28 | 0 |
| Indonesia                  | Male   | All Ages         | 2.34 | 2.26 | 2.42 | 0 |
| Indonesia                  | Male   | 15-49 years      | 1.8  | 1.7  | 1.9  | 0 |
| Indonesia                  | Male   | 50-69 years      | 1.33 | 1.24 | 1.42 | 0 |
| Indonesia                  | Male   | 70+ years        | 1.12 | 1.06 | 1.19 | 0 |
| Indonesia                  | Male   | Age-standardized | 1.34 | 1.26 | 1.42 | 0 |
| Indonesia                  | Female | All Ages         | 1.97 | 1.91 | 2.03 | 0 |
| Indonesia                  | Female | 15-49 years      | 1.45 | 1.39 | 1.51 | 0 |
| Indonesia                  | Female | 50-69 years      | 1.01 | 0.97 | 1.05 | 0 |
| Indonesia                  | Female | 70+ years        | 0.82 | 0.78 | 0.87 | 0 |
| Indonesia                  | Female | Age-standardized | 0.97 | 0.93 | 1.02 | 0 |
| Indonesia                  | Both   | All Ages         | 2.22 | 2.17 | 2.28 | 0 |
| Indonesia                  | Both   | 15-49 years      | 1.71 | 1.64 | 1.79 | 0 |
| Indonesia                  | Both   | 50-69 years      | 1.25 | 1.19 | 1.31 | 0 |
| Indonesia                  | Both   | 70+ years        | 0.91 | 0.87 | 0.94 | 0 |
| Panama                     | Both   | Age-standardized | 1.22 | 1.17 | 1.27 | 0 |
| Solomon Islands            | Male   | All Ages         | 1.48 | 1.38 | 1.57 | 0 |
| Solomon Islands            | Male   | 15-49 years      | 1.3  | 1.21 | 1.4  | 0 |
| Solomon Islands            | Male   | 50-69 years      | 0.87 | 0.78 | 0.97 | 0 |
| Solomon Islands            | Male   | 70+ years        | 0.74 | 0.67 | 0.82 | 0 |
| Solomon Islands            | Male   | Age-standardized | 0.93 | 0.85 | 1.02 | 0 |
| Solomon Islands            | Female | All Ages         | 1.89 | 1.82 | 1.96 | 0 |
| Solomon Islands            | Female | 15-49 years      | 1.53 | 1.46 | 1.6  | 0 |
| Solomon Islands            | Female | 50-69 years      | 1.15 | 1.09 | 1.21 | 0 |
| Solomon Islands            | Female | 70+ years        | 0.97 | 0.91 | 1.04 | 0 |
| Solomon Islands            | Female | Age-standardized | 1.12 | 1.06 | 1.18 | 0 |
| Solomon Islands            | Both   | All Ages         | 1.65 | 1.57 | 1.74 | 0 |
| Solomon Islands            | Both   | 15-49 years      | 1.4  | 1.32 | 1.48 | 0 |
| Solomon Islands            | Both   | 50-69 years      | 0.98 | 0.91 | 1.05 | 0 |
| Solomon Islands            | Both   | 70+ years        | 0.79 | 0.72 | 0.86 | 0 |
| Indonesia                  | Both   | Age-standardized | 1.22 | 1.17 | 1.28 | 0 |
| Paraguay                   | Male   | All Ages         | 1.89 | 1.85 | 1.94 | 0 |
| Paraguay                   | Male   | 15-49 years      | 1.15 | 1.12 | 1.18 | 0 |
| Paraguay                   | Male   | 50-69 years      | 0.97 | 0.92 | 1.02 | 0 |
| Paraguay                   | Male   | 70+ years        | 0.76 | 0.71 | 0.82 | 0 |
| Paraguay                   | Male   | Age-standardized | 1.02 | 0.96 | 1.07 | 0 |
| Paraguay                   | Female | All Ages         | 1.95 | 1.9  | 1.99 | 0 |
| Paraguay                   | Female | 15-49 years      | 1.16 | 1.12 | 1.21 | 0 |
| Paraguay                   | Female | 50-69 years      | 0.98 | 0.93 | 1.03 | 0 |
| Paraguay                   | Female | 70+ years        | 0.88 | 0.81 | 0.94 | 0 |
| Paraguay                   | Female | Age-standardized | 1.02 | 0.96 | 1.07 | 0 |
| Paraguay                   | Both   | All Ages         | 1.92 | 1.87 | 1.97 | 0 |
| Paraguay                   | Both   | 15-49 years      | 1.17 | 1.13 | 1.2  | 0 |
| Paraguay                   | Both   | 50-69 years      | 0.98 | 0.93 | 1.03 | 0 |
| Paraguay                   | Both   | 70+ years        | 0.82 | 0.76 | 0.88 | 0 |
| Cape Verde                 | Both   | Age-standardized | 1.22 | 1.18 | 1.26 | 0 |
| El Salvador                | Male   | All Ages         | 2.37 | 2.29 | 2.45 | 0 |
| El Salvador                | Male   | 15-49 years      | 1.6  | 1.44 | 1.75 | 0 |
| El Salvador                | Male   | 50-69 years      | 1.28 | 1.15 | 1.41 | 0 |

|               |        |                  |      |      |      |   |
|---------------|--------|------------------|------|------|------|---|
| El Salvador   | Male   | 70+ years        | 1.08 | 0.96 | 1.2  | 0 |
| El Salvador   | Male   | Age-standardized | 1.35 | 1.22 | 1.48 | 0 |
| El Salvador   | Female | All Ages         | 2.61 | 2.5  | 2.72 | 0 |
| El Salvador   | Female | 15-49 years      | 1.73 | 1.56 | 1.89 | 0 |
| El Salvador   | Female | 50-69 years      | 1.35 | 1.23 | 1.48 | 0 |
| El Salvador   | Female | 70+ years        | 1.23 | 1.1  | 1.35 | 0 |
| El Salvador   | Female | Age-standardized | 1.38 | 1.25 | 1.51 | 0 |
| El Salvador   | Both   | All Ages         | 2.46 | 2.37 | 2.55 | 0 |
| El Salvador   | Both   | 15-49 years      | 1.63 | 1.48 | 1.79 | 0 |
| El Salvador   | Both   | 50-69 years      | 1.26 | 1.14 | 1.39 | 0 |
| El Salvador   | Both   | 70+ years        | 1.11 | 0.98 | 1.23 | 0 |
| United States | Both   | Age-standardized | 1.22 | 1.1  | 1.34 | 0 |
| Ireland       | Male   | All Ages         | 1.64 | 1.47 | 1.81 | 0 |
| Ireland       | Male   | 15-49 years      | 1.45 | 1.33 | 1.58 | 0 |
| Ireland       | Male   | 50-69 years      | 1.03 | 0.92 | 1.13 | 0 |
| Ireland       | Male   | 70+ years        | 0.77 | 0.67 | 0.86 | 0 |
| Ireland       | Male   | Age-standardized | 1.06 | 0.94 | 1.18 | 0 |
| Ireland       | Female | All Ages         | 1.75 | 1.59 | 1.9  | 0 |
| Ireland       | Female | 15-49 years      | 1.62 | 1.49 | 1.74 | 0 |
| Ireland       | Female | 50-69 years      | 1.25 | 1.13 | 1.37 | 0 |
| Ireland       | Female | 70+ years        | 1.14 | 1.02 | 1.26 | 0 |
| Ireland       | Female | Age-standardized | 1.27 | 1.14 | 1.4  | 0 |
| Ireland       | Both   | All Ages         | 1.67 | 1.51 | 1.84 | 0 |
| Ireland       | Both   | 15-49 years      | 1.48 | 1.35 | 1.62 | 0 |
| Ireland       | Both   | 50-69 years      | 1.11 | 1    | 1.23 | 0 |
| Ireland       | Both   | 70+ years        | 1.01 | 0.92 | 1.1  | 0 |
| Malaysia      | Both   | Age-standardized | 1.21 | 1.18 | 1.24 | 0 |
| Mali          | Male   | All Ages         | 1    | 0.99 | 1.01 | 0 |
| Mali          | Male   | 15-49 years      | 1.09 | 1.04 | 1.13 | 0 |
| Mali          | Male   | 50-69 years      | 1.13 | 1.1  | 1.16 | 0 |
| Mali          | Male   | 70+ years        | 1.15 | 1.12 | 1.19 | 0 |
| Mali          | Male   | Age-standardized | 1.18 | 1.15 | 1.2  | 0 |
| Mali          | Female | All Ages         | 0.55 | 0.52 | 0.59 | 0 |
| Mali          | Female | 15-49 years      | 0.67 | 0.66 | 0.68 | 0 |
| Mali          | Female | 50-69 years      | 0.76 | 0.74 | 0.78 | 0 |
| Mali          | Female | 70+ years        | 0.94 | 0.93 | 0.96 | 0 |
| Mali          | Female | Age-standardized | 0.84 | 0.82 | 0.86 | 0 |
| Mali          | Both   | All Ages         | 0.84 | 0.82 | 0.85 | 0 |
| Mali          | Both   | 15-49 years      | 0.94 | 0.91 | 0.96 | 0 |
| Mali          | Both   | 50-69 years      | 1.03 | 1.01 | 1.04 | 0 |
| Mali          | Both   | 70+ years        | 1.1  | 1.08 | 1.13 | 0 |
| Uruguay       | Both   | Age-standardized | 1.21 | 1.17 | 1.26 | 0 |
| Grenada       | Male   | All Ages         | 2.88 | 2.76 | 3    | 0 |
| Grenada       | Male   | 15-49 years      | 1.7  | 1.6  | 1.81 | 0 |
| Grenada       | Male   | 50-69 years      | 1.16 | 1.1  | 1.23 | 0 |
| Grenada       | Male   | 70+ years        | 1.05 | 0.96 | 1.14 | 0 |
| Grenada       | Male   | Age-standardized | 1.24 | 1.16 | 1.31 | 0 |
| Grenada       | Female | All Ages         | 2.59 | 2.48 | 2.7  | 0 |
| Grenada       | Female | 15-49 years      | 1.61 | 1.54 | 1.67 | 0 |
| Grenada       | Female | 50-69 years      | 1.1  | 1.03 | 1.16 | 0 |
| Grenada       | Female | 70+ years        | 1.15 | 1.04 | 1.25 | 0 |
| Grenada       | Female | Age-standardized | 1.18 | 1.11 | 1.25 | 0 |
| Grenada       | Both   | All Ages         | 2.8  | 2.7  | 2.9  | 0 |
| Grenada       | Both   | 15-49 years      | 1.69 | 1.6  | 1.78 | 0 |
| Grenada       | Both   | 50-69 years      | 1.26 | 1.19 | 1.32 | 0 |
| Grenada       | Both   | 70+ years        | 1.27 | 1.2  | 1.34 | 0 |

|                |        |                  |      |      |      |   |
|----------------|--------|------------------|------|------|------|---|
| Uzbekistan     | Both   | Age-standardized | 1.21 | 1.08 | 1.34 | 0 |
| Bolivia        | Male   | All Ages         | 2.52 | 2.42 | 2.61 | 0 |
| Bolivia        | Male   | 15-49 years      | 1.7  | 1.64 | 1.76 | 0 |
| Bolivia        | Male   | 50-69 years      | 1.38 | 1.31 | 1.46 | 0 |
| Bolivia        | Male   | 70+ years        | 1.19 | 1.1  | 1.29 | 0 |
| Bolivia        | Male   | Age-standardized | 1.46 | 1.39 | 1.54 | 0 |
| Bolivia        | Female | All Ages         | 2.12 | 2.02 | 2.22 | 0 |
| Bolivia        | Female | 15-49 years      | 1.29 | 1.2  | 1.38 | 0 |
| Bolivia        | Female | 50-69 years      | 1.09 | 1    | 1.19 | 0 |
| Bolivia        | Female | 70+ years        | 0.96 | 0.85 | 1.07 | 0 |
| Bolivia        | Female | Age-standardized | 1.11 | 1    | 1.21 | 0 |
| Bolivia        | Both   | All Ages         | 2.38 | 2.28 | 2.47 | 0 |
| Bolivia        | Both   | 15-49 years      | 1.58 | 1.52 | 1.65 | 0 |
| Bolivia        | Both   | 50-69 years      | 1.29 | 1.2  | 1.37 | 0 |
| Bolivia        | Both   | 70+ years        | 1.08 | 0.98 | 1.18 | 0 |
| Yemen          | Both   | Age-standardized | 1.2  | 1.18 | 1.22 | 0 |
| United Kingdom | Male   | All Ages         | 1.28 | 1.15 | 1.42 | 0 |
| United Kingdom | Male   | 15-49 years      | 1.15 | 0.99 | 1.31 | 0 |
| United Kingdom | Male   | 50-69 years      | 1.04 | 0.91 | 1.17 | 0 |
| United Kingdom | Male   | 70+ years        | 0.73 | 0.62 | 0.84 | 0 |
| United Kingdom | Male   | Age-standardized | 1.07 | 0.93 | 1.21 | 0 |
| United Kingdom | Female | All Ages         | 1.43 | 1.28 | 1.58 | 0 |
| United Kingdom | Female | 15-49 years      | 1.39 | 1.22 | 1.56 | 0 |
| United Kingdom | Female | 50-69 years      | 1.3  | 1.15 | 1.46 | 0 |
| United Kingdom | Female | 70+ years        | 1.14 | 1    | 1.27 | 0 |
| United Kingdom | Female | Age-standardized | 1.33 | 1.17 | 1.48 | 0 |
| United Kingdom | Both   | All Ages         | 1.36 | 1.22 | 1.5  | 0 |
| United Kingdom | Both   | 15-49 years      | 1.24 | 1.08 | 1.39 | 0 |
| United Kingdom | Both   | 50-69 years      | 1.15 | 1.01 | 1.29 | 0 |
| United Kingdom | Both   | 70+ years        | 1.07 | 0.95 | 1.19 | 0 |
| Angola         | Both   | Age-standardized | 1.2  | 1.11 | 1.29 | 0 |
| Belgium        | Male   | All Ages         | 1.2  | 1.04 | 1.37 | 0 |
| Belgium        | Male   | 15-49 years      | 1.09 | 0.91 | 1.27 | 0 |
| Belgium        | Male   | 50-69 years      | 0.93 | 0.8  | 1.07 | 0 |
| Belgium        | Male   | 70+ years        | 0.65 | 0.51 | 0.78 | 0 |
| Belgium        | Male   | Age-standardized | 0.97 | 0.83 | 1.11 | 0 |
| Belgium        | Female | All Ages         | 1.31 | 1.13 | 1.49 | 0 |
| Belgium        | Female | 15-49 years      | 1.23 | 1.02 | 1.45 | 0 |
| Belgium        | Female | 50-69 years      | 1.04 | 0.91 | 1.18 | 0 |
| Belgium        | Female | 70+ years        | 0.92 | 0.79 | 1.05 | 0 |
| Belgium        | Female | Age-standardized | 1.11 | 0.96 | 1.27 | 0 |
| Belgium        | Both   | All Ages         | 1.24 | 1.08 | 1.41 | 0 |
| Belgium        | Both   | 15-49 years      | 1.12 | 0.93 | 1.31 | 0 |
| Belgium        | Both   | 50-69 years      | 1    | 0.86 | 1.13 | 0 |
| Belgium        | Both   | 70+ years        | 0.89 | 0.75 | 1.02 | 0 |
| Colombia       | Both   | Age-standardized | 1.19 | 1.14 | 1.24 | 0 |
| Laos           | Male   | All Ages         | 1.82 | 1.66 | 1.99 | 0 |
| Laos           | Male   | 15-49 years      | 1.08 | 0.99 | 1.17 | 0 |
| Laos           | Male   | 50-69 years      | 0.94 | 0.86 | 1.01 | 0 |
| Laos           | Male   | 70+ years        | 0.77 | 0.71 | 0.84 | 0 |
| Laos           | Male   | Age-standardized | 0.95 | 0.88 | 1.03 | 0 |
| Laos           | Female | All Ages         | 1.67 | 1.52 | 1.82 | 0 |
| Laos           | Female | 15-49 years      | 1.03 | 0.96 | 1.11 | 0 |
| Laos           | Female | 50-69 years      | 0.96 | 0.93 | 1    | 0 |
| Laos           | Female | 70+ years        | 0.77 | 0.74 | 0.81 | 0 |
| Laos           | Female | Age-standardized | 0.91 | 0.87 | 0.95 | 0 |

|                |        |                  |      |      |      |   |
|----------------|--------|------------------|------|------|------|---|
| Laos           | Both   | All Ages         | 1.76 | 1.61 | 1.92 | 0 |
| Laos           | Both   | 15-49 years      | 1.08 | 1.01 | 1.16 | 0 |
| Laos           | Both   | 50-69 years      | 0.96 | 0.91 | 1.02 | 0 |
| Laos           | Both   | 70+ years        | 0.77 | 0.72 | 0.81 | 0 |
| Gabon          | Both   | Age-standardized | 1.19 | 1.12 | 1.25 | 0 |
| Azerbaijan     | Male   | All Ages         | 1.98 | 1.84 | 2.12 | 0 |
| Azerbaijan     | Male   | 15-49 years      | 1.38 | 1.26 | 1.49 | 0 |
| Azerbaijan     | Male   | 50-69 years      | 0.5  | 0.37 | 0.62 | 0 |
| Azerbaijan     | Male   | 70+ years        | 1.12 | 1.09 | 1.16 | 0 |
| Azerbaijan     | Male   | Age-standardized | 0.98 | 0.86 | 1.1  | 0 |
| Azerbaijan     | Female | All Ages         | 2.02 | 1.82 | 2.21 | 0 |
| Azerbaijan     | Female | 15-49 years      | 1.35 | 1.25 | 1.46 | 0 |
| Azerbaijan     | Female | 50-69 years      | 0.75 | 0.66 | 0.85 | 0 |
| Azerbaijan     | Female | 70+ years        | 1.7  | 1.58 | 1.82 | 0 |
| Azerbaijan     | Female | Age-standardized | 1.16 | 1.02 | 1.3  | 0 |
| Azerbaijan     | Both   | All Ages         | 2.01 | 1.84 | 2.17 | 0 |
| Azerbaijan     | Both   | 15-49 years      | 1.39 | 1.27 | 1.5  | 0 |
| Azerbaijan     | Both   | 50-69 years      | 0.62 | 0.52 | 0.73 | 0 |
| Azerbaijan     | Both   | 70+ years        | 1.58 | 1.51 | 1.66 | 0 |
| United Kingdom | Both   | Age-standardized | 1.19 | 1.05 | 1.33 | 0 |
| Egypt          | Male   | All Ages         | 1.49 | 1.45 | 1.52 | 0 |
| Egypt          | Male   | 15-49 years      | 1.18 | 1.12 | 1.23 | 0 |
| Egypt          | Male   | 50-69 years      | 0.88 | 0.87 | 0.89 | 0 |
| Egypt          | Male   | 70+ years        | 0.77 | 0.76 | 0.78 | 0 |
| Egypt          | Male   | Age-standardized | 0.96 | 0.95 | 0.97 | 0 |
| Egypt          | Female | All Ages         | 1.58 | 1.54 | 1.61 | 0 |
| Egypt          | Female | 15-49 years      | 1.26 | 1.22 | 1.3  | 0 |
| Egypt          | Female | 50-69 years      | 1.06 | 1.05 | 1.08 | 0 |
| Egypt          | Female | 70+ years        | 0.93 | 0.91 | 0.96 | 0 |
| Egypt          | Female | Age-standardized | 1.1  | 1.09 | 1.11 | 0 |
| Egypt          | Both   | All Ages         | 1.53 | 1.5  | 1.56 | 0 |
| Egypt          | Both   | 15-49 years      | 1.21 | 1.16 | 1.26 | 0 |
| Egypt          | Both   | 50-69 years      | 0.98 | 0.97 | 0.99 | 0 |
| Egypt          | Both   | 70+ years        | 0.81 | 0.79 | 0.82 | 0 |
| Luxembourg     | Both   | Age-standardized | 1.19 | 1.09 | 1.3  | 0 |
| Guinea         | Male   | All Ages         | 0.55 | 0.48 | 0.62 | 0 |
| Guinea         | Male   | 15-49 years      | 0.58 | 0.52 | 0.64 | 0 |
| Guinea         | Male   | 50-69 years      | 0.61 | 0.53 | 0.68 | 0 |
| Guinea         | Male   | 70+ years        | 0.64 | 0.59 | 0.68 | 0 |
| Guinea         | Male   | Age-standardized | 0.66 | 0.59 | 0.72 | 0 |
| Guinea         | Female | All Ages         | 0.29 | 0.21 | 0.37 | 0 |
| Guinea         | Female | 15-49 years      | 0.31 | 0.23 | 0.39 | 0 |
| Guinea         | Female | 50-69 years      | 0.34 | 0.29 | 0.4  | 0 |
| Guinea         | Female | 70+ years        | 0.49 | 0.47 | 0.52 | 0 |
| Guinea         | Female | Age-standardized | 0.44 | 0.4  | 0.49 | 0 |
| Guinea         | Both   | All Ages         | 0.44 | 0.37 | 0.5  | 0 |
| Guinea         | Both   | 15-49 years      | 0.44 | 0.38 | 0.5  | 0 |
| Guinea         | Both   | 50-69 years      | 0.56 | 0.49 | 0.64 | 0 |
| Guinea         | Both   | 70+ years        | 0.58 | 0.52 | 0.65 | 0 |
| Sweden         | Both   | Age-standardized | 1.19 | 1.08 | 1.29 | 0 |
| Vanuatu        | Male   | All Ages         | 1.32 | 1.26 | 1.38 | 0 |
| Vanuatu        | Male   | 15-49 years      | 0.91 | 0.85 | 0.97 | 0 |
| Vanuatu        | Male   | 50-69 years      | 0.8  | 0.77 | 0.84 | 0 |
| Vanuatu        | Male   | 70+ years        | 0.72 | 0.69 | 0.74 | 0 |
| Vanuatu        | Male   | Age-standardized | 0.8  | 0.76 | 0.83 | 0 |
| Vanuatu        | Female | All Ages         | 1.76 | 1.71 | 1.81 | 0 |

|             |        |                  |      |      |      |   |
|-------------|--------|------------------|------|------|------|---|
| Vanuatu     | Female | 15-49 years      | 1.23 | 1.19 | 1.27 | 0 |
| Vanuatu     | Female | 50-69 years      | 1.18 | 1.14 | 1.21 | 0 |
| Vanuatu     | Female | 70+ years        | 1    | 0.96 | 1.05 | 0 |
| Vanuatu     | Female | Age-standardized | 1.12 | 1.08 | 1.15 | 0 |
| Vanuatu     | Both   | All Ages         | 1.51 | 1.47 | 1.55 | 0 |
| Vanuatu     | Both   | 15-49 years      | 1.05 | 1.02 | 1.09 | 0 |
| Vanuatu     | Both   | 50-69 years      | 0.95 | 0.93 | 0.97 | 0 |
| Vanuatu     | Both   | 70+ years        | 0.82 | 0.8  | 0.84 | 0 |
| Botswana    | Both   | Age-standardized | 1.18 | 1.14 | 1.23 | 0 |
| Libya       | Male   | All Ages         | 2.25 | 2.2  | 2.3  | 0 |
| Libya       | Male   | 15-49 years      | 1.7  | 1.59 | 1.82 | 0 |
| Libya       | Male   | 50-69 years      | 0.94 | 0.91 | 0.96 | 0 |
| Libya       | Male   | 70+ years        | 0.81 | 0.79 | 0.83 | 0 |
| Libya       | Male   | Age-standardized | 1.03 | 1    | 1.06 | 0 |
| Libya       | Female | All Ages         | 2.87 | 2.8  | 2.93 | 0 |
| Libya       | Female | 15-49 years      | 2.15 | 2.03 | 2.28 | 0 |
| Libya       | Female | 50-69 years      | 1.26 | 1.17 | 1.35 | 0 |
| Libya       | Female | 70+ years        | 1.13 | 1.05 | 1.21 | 0 |
| Libya       | Female | Age-standardized | 1.3  | 1.21 | 1.4  | 0 |
| Libya       | Both   | All Ages         | 2.49 | 2.43 | 2.55 | 0 |
| Libya       | Both   | 15-49 years      | 1.87 | 1.74 | 2    | 0 |
| Libya       | Both   | 50-69 years      | 0.99 | 0.94 | 1.03 | 0 |
| Libya       | Both   | 70+ years        | 0.97 | 0.93 | 1.01 | 0 |
| New Zealand | Both   | Age-standardized | 1.18 | 1.07 | 1.29 | 0 |
| Estonia     | Male   | All Ages         | 1.46 | 1.39 | 1.52 | 0 |
| Estonia     | Male   | 15-49 years      | 1.04 | 0.91 | 1.17 | 0 |
| Estonia     | Male   | 50-69 years      | 0.52 | 0.47 | 0.56 | 0 |
| Estonia     | Male   | 70+ years        | 0.54 | 0.46 | 0.61 | 0 |
| Estonia     | Male   | Age-standardized | 0.71 | 0.62 | 0.8  | 0 |
| Estonia     | Female | All Ages         | 2.08 | 1.94 | 2.21 | 0 |
| Estonia     | Female | 15-49 years      | 1.27 | 1.16 | 1.38 | 0 |
| Estonia     | Female | 50-69 years      | 1.14 | 1.03 | 1.25 | 0 |
| Estonia     | Female | 70+ years        | 1.4  | 1.2  | 1.6  | 0 |
| Estonia     | Female | Age-standardized | 1.22 | 1.08 | 1.35 | 0 |
| Estonia     | Both   | All Ages         | 1.71 | 1.62 | 1.8  | 0 |
| Estonia     | Both   | 15-49 years      | 1.17 | 1.04 | 1.3  | 0 |
| Estonia     | Both   | 50-69 years      | 0.83 | 0.76 | 0.9  | 0 |
| Estonia     | Both   | 70+ years        | 1.12 | 0.97 | 1.27 | 0 |
| Jordan      | Both   | Age-standardized | 1.18 | 1.16 | 1.2  | 0 |
| India       | Male   | All Ages         | 1.47 | 1.42 | 1.51 | 0 |
| India       | Male   | 15-49 years      | 0.87 | 0.86 | 0.88 | 0 |
| India       | Male   | 50-69 years      | 0.74 | 0.72 | 0.75 | 0 |
| India       | Male   | 70+ years        | 0.73 | 0.7  | 0.76 | 0 |
| India       | Male   | Age-standardized | 0.77 | 0.76 | 0.78 | 0 |
| India       | Female | All Ages         | 1.52 | 1.46 | 1.58 | 0 |
| India       | Female | 15-49 years      | 0.82 | 0.78 | 0.86 | 0 |
| India       | Female | 50-69 years      | 0.68 | 0.65 | 0.72 | 0 |
| India       | Female | 70+ years        | 0.86 | 0.82 | 0.89 | 0 |
| India       | Female | Age-standardized | 0.71 | 0.68 | 0.75 | 0 |
| India       | Both   | All Ages         | 1.48 | 1.43 | 1.53 | 0 |
| India       | Both   | 15-49 years      | 0.85 | 0.83 | 0.86 | 0 |
| India       | Both   | 50-69 years      | 0.68 | 0.65 | 0.7  | 0 |
| India       | Both   | 70+ years        | 0.71 | 0.69 | 0.74 | 0 |
| Brazil      | Both   | Age-standardized | 1.18 | 1.15 | 1.2  | 0 |
| Portugal    | Male   | All Ages         | 1.6  | 1.43 | 1.76 | 0 |
| Portugal    | Male   | 15-49 years      | 1.35 | 1.19 | 1.51 | 0 |

|               |        |                  |      |      |      |   |
|---------------|--------|------------------|------|------|------|---|
| Portugal      | Male   | 50-69 years      | 0.92 | 0.79 | 1.05 | 0 |
| Portugal      | Male   | 70+ years        | 0.61 | 0.49 | 0.74 | 0 |
| Portugal      | Male   | Age-standardized | 0.95 | 0.82 | 1.08 | 0 |
| Portugal      | Female | All Ages         | 1.91 | 1.74 | 2.08 | 0 |
| Portugal      | Female | 15-49 years      | 1.49 | 1.34 | 1.64 | 0 |
| Portugal      | Female | 50-69 years      | 1.27 | 1.09 | 1.46 | 0 |
| Portugal      | Female | 70+ years        | 0.98 | 0.84 | 1.12 | 0 |
| Portugal      | Female | Age-standardized | 1.19 | 1.04 | 1.34 | 0 |
| Portugal      | Both   | All Ages         | 1.74 | 1.57 | 1.91 | 0 |
| Portugal      | Both   | 15-49 years      | 1.4  | 1.24 | 1.56 | 0 |
| Portugal      | Both   | 50-69 years      | 1.1  | 0.94 | 1.26 | 0 |
| Portugal      | Both   | 70+ years        | 0.83 | 0.7  | 0.96 | 0 |
| Seychelles    | Both   | Age-standardized | 1.17 | 1.13 | 1.2  | 0 |
| Dominica      | Male   | All Ages         | 2.08 | 1.97 | 2.19 | 0 |
| Dominica      | Male   | 15-49 years      | 1.35 | 1.18 | 1.51 | 0 |
| Dominica      | Male   | 50-69 years      | 0.82 | 0.74 | 0.9  | 0 |
| Dominica      | Male   | 70+ years        | 0.72 | 0.64 | 0.8  | 0 |
| Dominica      | Male   | Age-standardized | 0.95 | 0.86 | 1.03 | 0 |
| Dominica      | Female | All Ages         | 1.68 | 1.65 | 1.71 | 0 |
| Dominica      | Female | 15-49 years      | 1.31 | 1.18 | 1.44 | 0 |
| Dominica      | Female | 50-69 years      | 0.84 | 0.75 | 0.93 | 0 |
| Dominica      | Female | 70+ years        | 0.81 | 0.73 | 0.89 | 0 |
| Dominica      | Female | Age-standardized | 0.93 | 0.85 | 1.01 | 0 |
| Dominica      | Both   | All Ages         | 1.95 | 1.87 | 2.02 | 0 |
| Dominica      | Both   | 15-49 years      | 1.31 | 1.15 | 1.46 | 0 |
| Dominica      | Both   | 50-69 years      | 1.05 | 0.95 | 1.15 | 0 |
| Dominica      | Both   | 70+ years        | 0.83 | 0.74 | 0.91 | 0 |
| Guyana        | Both   | Age-standardized | 1.17 | 1.08 | 1.25 | 0 |
| Rwanda        | Male   | All Ages         | 1.38 | 1.11 | 1.64 | 0 |
| Rwanda        | Male   | 15-49 years      | 0.92 | 0.71 | 1.13 | 0 |
| Rwanda        | Male   | 50-69 years      | 0.73 | 0.58 | 0.87 | 0 |
| Rwanda        | Male   | 70+ years        | 0.82 | 0.69 | 0.95 | 0 |
| Rwanda        | Male   | Age-standardized | 0.83 | 0.69 | 0.96 | 0 |
| Rwanda        | Female | All Ages         | 0.99 | 0.8  | 1.18 | 0 |
| Rwanda        | Female | 15-49 years      | 0.5  | 0.33 | 0.68 | 0 |
| Rwanda        | Female | 50-69 years      | 0.23 | 0.12 | 0.33 | 0 |
| Rwanda        | Female | 70+ years        | 0.46 | 0.34 | 0.59 | 0 |
| Rwanda        | Female | Age-standardized | 0.36 | 0.24 | 0.47 | 0 |
| Rwanda        | Both   | All Ages         | 1.22 | 0.98 | 1.47 | 0 |
| Rwanda        | Both   | 15-49 years      | 0.77 | 0.56 | 0.99 | 0 |
| Rwanda        | Both   | 50-69 years      | 0.53 | 0.39 | 0.67 | 0 |
| Rwanda        | Both   | 70+ years        | 0.38 | 0.25 | 0.51 | 0 |
| Guinea-Bissau | Both   | Age-standardized | 1.17 | 1.1  | 1.25 | 0 |
| Venezuela     | Male   | All Ages         | 2.4  | 2.33 | 2.47 | 0 |
| Venezuela     | Male   | 15-49 years      | 1.61 | 1.55 | 1.67 | 0 |
| Venezuela     | Male   | 50-69 years      | 1.2  | 1.13 | 1.26 | 0 |
| Venezuela     | Male   | 70+ years        | 0.99 | 0.93 | 1.06 | 0 |
| Venezuela     | Male   | Age-standardized | 1.28 | 1.22 | 1.35 | 0 |
| Venezuela     | Female | All Ages         | 2.52 | 2.44 | 2.61 | 0 |
| Venezuela     | Female | 15-49 years      | 1.67 | 1.6  | 1.73 | 0 |
| Venezuela     | Female | 50-69 years      | 1.32 | 1.25 | 1.4  | 0 |
| Venezuela     | Female | 70+ years        | 1.13 | 1.06 | 1.21 | 0 |
| Venezuela     | Female | Age-standardized | 1.36 | 1.28 | 1.43 | 0 |
| Venezuela     | Both   | All Ages         | 2.45 | 2.38 | 2.53 | 0 |
| Venezuela     | Both   | 15-49 years      | 1.65 | 1.58 | 1.71 | 0 |
| Venezuela     | Both   | 50-69 years      | 1.25 | 1.18 | 1.31 | 0 |

|             |        |                  |       |       |      |       |
|-------------|--------|------------------|-------|-------|------|-------|
| Venezuela   | Both   | 70+ years        | 1.05  | 0.99  | 1.11 | 0     |
| Jamaica     | Both   | Age-standardized | 1.17  | 1.05  | 1.29 | 0     |
| Ethiopia    | Male   | All Ages         | 1.17  | 1.07  | 1.26 | 0     |
| Ethiopia    | Male   | 15-49 years      | 0.92  | 0.84  | 0.99 | 0     |
| Ethiopia    | Male   | 50-69 years      | 0.9   | 0.85  | 0.94 | 0     |
| Ethiopia    | Male   | 70+ years        | 0.86  | 0.82  | 0.9  | 0     |
| Ethiopia    | Male   | Age-standardized | 0.93  | 0.88  | 0.98 | 0     |
| Ethiopia    | Female | All Ages         | 0.18  | 0.04  | 0.31 | 0.012 |
| Ethiopia    | Female | 15-49 years      | -0.04 | -0.12 | 0.03 | 0.254 |
| Ethiopia    | Female | 50-69 years      | 0     | -0.04 | 0.03 | 0.801 |
| Ethiopia    | Female | 70+ years        | 0.05  | 0.02  | 0.08 | 0.004 |
| Ethiopia    | Female | Age-standardized | 0.02  | -0.01 | 0.04 | 0.112 |
| Ethiopia    | Both   | All Ages         | 0.85  | 0.74  | 0.96 | 0     |
| Ethiopia    | Both   | 15-49 years      | 0.63  | 0.56  | 0.7  | 0     |
| Ethiopia    | Both   | 50-69 years      | 0.56  | 0.55  | 0.57 | 0     |
| Ethiopia    | Both   | 70+ years        | 0.74  | 0.7   | 0.77 | 0     |
| Puerto Rico | Both   | Age-standardized | 1.16  | 1.04  | 1.27 | 0     |
| Somalia     | Male   | All Ages         | 0.58  | 0.53  | 0.62 | 0     |
| Somalia     | Male   | 15-49 years      | 0.56  | 0.39  | 0.73 | 0     |
| Somalia     | Male   | 50-69 years      | 0.54  | 0.46  | 0.62 | 0     |
| Somalia     | Male   | 70+ years        | 0.57  | 0.5   | 0.63 | 0     |
| Somalia     | Male   | Age-standardized | 0.5   | 0.44  | 0.56 | 0     |
| Somalia     | Female | All Ages         | -0.01 | -0.05 | 0.04 | 0.816 |
| Somalia     | Female | 15-49 years      | -0.04 | -0.19 | 0.12 | 0.639 |
| Somalia     | Female | 50-69 years      | 0.01  | -0.07 | 0.08 | 0.888 |
| Somalia     | Female | 70+ years        | 0.12  | 0.06  | 0.18 | 0     |
| Somalia     | Female | Age-standardized | -0.01 | -0.07 | 0.05 | 0.716 |
| Somalia     | Both   | All Ages         | 0.35  | 0.3   | 0.4  | 0     |
| Somalia     | Both   | 15-49 years      | 0.34  | 0.18  | 0.5  | 0     |
| Somalia     | Both   | 50-69 years      | 0.31  | 0.23  | 0.39 | 0     |
| Somalia     | Both   | 70+ years        | 0.28  | 0.21  | 0.35 | 0     |
| Syria       | Both   | Age-standardized | 1.16  | 1.14  | 1.18 | 0     |
| Togo        | Male   | All Ages         | 1.9   | 1.86  | 1.94 | 0     |
| Togo        | Male   | 15-49 years      | 1.44  | 1.38  | 1.51 | 0     |
| Togo        | Male   | 50-69 years      | 1.12  | 1.04  | 1.19 | 0     |
| Togo        | Male   | 70+ years        | 1.18  | 1.11  | 1.25 | 0     |
| Togo        | Male   | Age-standardized | 1.18  | 1.11  | 1.25 | 0     |
| Togo        | Female | All Ages         | 1.71  | 1.7   | 1.72 | 0     |
| Togo        | Female | 15-49 years      | 1.1   | 1.06  | 1.14 | 0     |
| Togo        | Female | 50-69 years      | 0.82  | 0.79  | 0.84 | 0     |
| Togo        | Female | 70+ years        | 0.96  | 0.93  | 0.99 | 0     |
| Togo        | Female | Age-standardized | 0.87  | 0.85  | 0.89 | 0     |
| Togo        | Both   | All Ages         | 1.83  | 1.8   | 1.86 | 0     |
| Togo        | Both   | 15-49 years      | 1.32  | 1.27  | 1.36 | 0     |
| Togo        | Both   | 50-69 years      | 0.96  | 0.89  | 1.03 | 0     |
| Togo        | Both   | 70+ years        | 0.83  | 0.79  | 0.86 | 0     |
| Lebanon     | Both   | Age-standardized | 1.16  | 1.13  | 1.19 | 0     |
| Oman        | Male   | All Ages         | 3.39  | 3.07  | 3.71 | 0     |
| Oman        | Male   | 15-49 years      | 2.3   | 2.06  | 2.53 | 0     |
| Oman        | Male   | 50-69 years      | 1.96  | 1.85  | 2.07 | 0     |
| Oman        | Male   | 70+ years        | 1.73  | 1.61  | 1.85 | 0     |
| Oman        | Male   | Age-standardized | 2.04  | 1.93  | 2.15 | 0     |
| Oman        | Female | All Ages         | 3.8   | 3.54  | 4.05 | 0     |
| Oman        | Female | 15-49 years      | 2.55  | 2.24  | 2.87 | 0     |
| Oman        | Female | 50-69 years      | 2.09  | 1.95  | 2.23 | 0     |
| Oman        | Female | 70+ years        | 1.95  | 1.78  | 2.13 | 0     |



|           |        |                  |      |      |      |   |
|-----------|--------|------------------|------|------|------|---|
| Oman      | Female | Age-standardized | 2.13 | 1.98 | 2.27 | 0 |
| Oman      | Both   | All Ages         | 3.66 | 3.28 | 4.04 | 0 |
| Oman      | Both   | 15-49 years      | 2.46 | 2.11 | 2.81 | 0 |
| Oman      | Both   | 50-69 years      | 2.08 | 1.96 | 2.2  | 0 |
| Oman      | Both   | 70+ years        | 1.89 | 1.77 | 2.01 | 0 |
| Spain     | Both   | Age-standardized | 1.15 | 1.01 | 1.29 | 0 |
| Canada    | Male   | All Ages         | 1.36 | 1.26 | 1.46 | 0 |
| Canada    | Male   | 15-49 years      | 0.83 | 0.71 | 0.94 | 0 |
| Canada    | Male   | 50-69 years      | 0.83 | 0.75 | 0.9  | 0 |
| Canada    | Male   | 70+ years        | 0.5  | 0.42 | 0.58 | 0 |
| Canada    | Male   | Age-standardized | 0.81 | 0.72 | 0.89 | 0 |
| Canada    | Female | All Ages         | 1.14 | 1.05 | 1.23 | 0 |
| Canada    | Female | 15-49 years      | 0.53 | 0.43 | 0.64 | 0 |
| Canada    | Female | 50-69 years      | 0.54 | 0.5  | 0.58 | 0 |
| Canada    | Female | 70+ years        | 0.44 | 0.33 | 0.55 | 0 |
| Canada    | Female | Age-standardized | 0.55 | 0.46 | 0.63 | 0 |
| Canada    | Both   | All Ages         | 1.28 | 1.18 | 1.37 | 0 |
| Canada    | Both   | 15-49 years      | 0.72 | 0.62 | 0.83 | 0 |
| Canada    | Both   | 50-69 years      | 0.72 | 0.66 | 0.79 | 0 |
| Canada    | Both   | 70+ years        | 0.54 | 0.45 | 0.63 | 0 |
| Australia | Both   | Age-standardized | 1.15 | 1.03 | 1.27 | 0 |
| Vietnam   | Male   | All Ages         | 2.45 | 2.36 | 2.54 | 0 |
| Vietnam   | Male   | 15-49 years      | 1.4  | 1.37 | 1.43 | 0 |
| Vietnam   | Male   | 50-69 years      | 0.89 | 0.84 | 0.93 | 0 |
| Vietnam   | Male   | 70+ years        | 0.77 | 0.72 | 0.83 | 0 |
| Vietnam   | Male   | Age-standardized | 0.9  | 0.85 | 0.95 | 0 |
| Vietnam   | Female | All Ages         | 2.5  | 2.43 | 2.57 | 0 |
| Vietnam   | Female | 15-49 years      | 1.57 | 1.54 | 1.6  | 0 |
| Vietnam   | Female | 50-69 years      | 1.1  | 1.08 | 1.13 | 0 |
| Vietnam   | Female | 70+ years        | 0.95 | 0.91 | 1    | 0 |
| Vietnam   | Female | Age-standardized | 1.07 | 1.03 | 1.1  | 0 |
| Vietnam   | Both   | All Ages         | 2.48 | 2.39 | 2.56 | 0 |
| Vietnam   | Both   | 15-49 years      | 1.49 | 1.46 | 1.52 | 0 |
| Vietnam   | Both   | 50-69 years      | 1.01 | 0.98 | 1.04 | 0 |
| Vietnam   | Both   | 70+ years        | 0.88 | 0.83 | 0.93 | 0 |
| Iran      | Both   | Age-standardized | 1.15 | 1.13 | 1.18 | 0 |
| Sudan     | Male   | All Ages         | 1.31 | 1.25 | 1.36 | 0 |
| Sudan     | Male   | 15-49 years      | 1.23 | 1.19 | 1.27 | 0 |
| Sudan     | Male   | 50-69 years      | 1.08 | 1.06 | 1.1  | 0 |
| Sudan     | Male   | 70+ years        | 0.82 | 0.81 | 0.84 | 0 |
| Sudan     | Male   | Age-standardized | 1.1  | 1.07 | 1.13 | 0 |
| Sudan     | Female | All Ages         | 1.39 | 1.28 | 1.49 | 0 |
| Sudan     | Female | 15-49 years      | 1.35 | 1.28 | 1.42 | 0 |
| Sudan     | Female | 50-69 years      | 1.18 | 1.15 | 1.21 | 0 |
| Sudan     | Female | 70+ years        | 0.96 | 0.92 | 0.99 | 0 |
| Sudan     | Female | Age-standardized | 1.19 | 1.15 | 1.22 | 0 |
| Sudan     | Both   | All Ages         | 1.34 | 1.27 | 1.41 | 0 |
| Sudan     | Both   | 15-49 years      | 1.28 | 1.24 | 1.32 | 0 |
| Sudan     | Both   | 50-69 years      | 1.14 | 1.13 | 1.16 | 0 |
| Sudan     | Both   | 70+ years        | 0.91 | 0.9  | 0.93 | 0 |
| Haiti     | Both   | Age-standardized | 1.15 | 1.1  | 1.2  | 0 |
| Cyprus    | Male   | All Ages         | 1.67 | 1.54 | 1.79 | 0 |
| Cyprus    | Male   | 15-49 years      | 1.1  | 0.98 | 1.23 | 0 |
| Cyprus    | Male   | 50-69 years      | 0.93 | 0.79 | 1.07 | 0 |
| Cyprus    | Male   | 70+ years        | 0.72 | 0.6  | 0.83 | 0 |
| Cyprus    | Male   | Age-standardized | 0.94 | 0.79 | 1.09 | 0 |

|                                |        |                  |      |      |      |   |
|--------------------------------|--------|------------------|------|------|------|---|
| Cyprus                         | Female | All Ages         | 1.9  | 1.74 | 2.05 | 0 |
| Cyprus                         | Female | 15-49 years      | 1.36 | 1.2  | 1.51 | 0 |
| Cyprus                         | Female | 50-69 years      | 1.2  | 1.02 | 1.39 | 0 |
| Cyprus                         | Female | 70+ years        | 1.06 | 0.88 | 1.25 | 0 |
| Cyprus                         | Female | Age-standardized | 1.18 | 1    | 1.37 | 0 |
| Cyprus                         | Both   | All Ages         | 1.73 | 1.59 | 1.87 | 0 |
| Cyprus                         | Both   | 15-49 years      | 1.14 | 1.01 | 1.28 | 0 |
| Cyprus                         | Both   | 50-69 years      | 1.08 | 0.91 | 1.24 | 0 |
| Cyprus                         | Both   | 70+ years        | 0.87 | 0.74 | 1    | 0 |
| Chile                          | Both   | Age-standardized | 1.15 | 1.04 | 1.25 | 0 |
| Italy                          | Male   | All Ages         | 1.06 | 0.93 | 1.19 | 0 |
| Italy                          | Male   | 15-49 years      | 0.99 | 0.85 | 1.13 | 0 |
| Italy                          | Male   | 50-69 years      | 0.65 | 0.55 | 0.74 | 0 |
| Italy                          | Male   | 70+ years        | 0.42 | 0.33 | 0.5  | 0 |
| Italy                          | Male   | Age-standardized | 0.66 | 0.57 | 0.75 | 0 |
| Italy                          | Female | All Ages         | 1.38 | 1.21 | 1.54 | 0 |
| Italy                          | Female | 15-49 years      | 1.29 | 1.15 | 1.44 | 0 |
| Italy                          | Female | 50-69 years      | 0.93 | 0.77 | 1.08 | 0 |
| Italy                          | Female | 70+ years        | 0.71 | 0.59 | 0.83 | 0 |
| Italy                          | Female | Age-standardized | 0.92 | 0.79 | 1.05 | 0 |
| Italy                          | Both   | All Ages         | 1.21 | 1.07 | 1.35 | 0 |
| Italy                          | Both   | 15-49 years      | 1.11 | 0.98 | 1.25 | 0 |
| Italy                          | Both   | 50-69 years      | 0.79 | 0.67 | 0.91 | 0 |
| Italy                          | Both   | 70+ years        | 0.59 | 0.49 | 0.7  | 0 |
| Trinidad and Tobago            | Both   | Age-standardized | 1.15 | 1.09 | 1.21 | 0 |
| Benin                          | Male   | All Ages         | 1.93 | 1.87 | 1.98 | 0 |
| Benin                          | Male   | 15-49 years      | 1.58 | 1.49 | 1.67 | 0 |
| Benin                          | Male   | 50-69 years      | 1.45 | 1.37 | 1.53 | 0 |
| Benin                          | Male   | 70+ years        | 1.45 | 1.36 | 1.54 | 0 |
| Benin                          | Male   | Age-standardized | 1.54 | 1.45 | 1.63 | 0 |
| Benin                          | Female | All Ages         | 1.59 | 1.52 | 1.67 | 0 |
| Benin                          | Female | 15-49 years      | 1.43 | 1.33 | 1.54 | 0 |
| Benin                          | Female | 50-69 years      | 1.3  | 1.22 | 1.37 | 0 |
| Benin                          | Female | 70+ years        | 1.46 | 1.38 | 1.55 | 0 |
| Benin                          | Female | Age-standardized | 1.43 | 1.34 | 1.53 | 0 |
| Benin                          | Both   | All Ages         | 1.83 | 1.78 | 1.88 | 0 |
| Benin                          | Both   | 15-49 years      | 1.61 | 1.53 | 1.7  | 0 |
| Benin                          | Both   | 50-69 years      | 1.46 | 1.38 | 1.54 | 0 |
| Benin                          | Both   | 70+ years        | 1.22 | 1.16 | 1.27 | 0 |
| Federated States of Micronesia | Both   | Age-standardized | 1.15 | 1.01 | 1.29 | 0 |
| Puerto Rico                    | Male   | All Ages         | 2.07 | 2.01 | 2.12 | 0 |
| Puerto Rico                    | Male   | 15-49 years      | 1.34 | 1.24 | 1.44 | 0 |
| Puerto Rico                    | Male   | 50-69 years      | 1.03 | 0.96 | 1.1  | 0 |
| Puerto Rico                    | Male   | 70+ years        | 0.73 | 0.69 | 0.77 | 0 |
| Puerto Rico                    | Male   | Age-standardized | 1.06 | 0.99 | 1.14 | 0 |
| Puerto Rico                    | Female | All Ages         | 2.38 | 2.22 | 2.55 | 0 |
| Puerto Rico                    | Female | 15-49 years      | 1.43 | 1.24 | 1.63 | 0 |
| Puerto Rico                    | Female | 50-69 years      | 1.32 | 1.15 | 1.49 | 0 |
| Puerto Rico                    | Female | 70+ years        | 1.14 | 0.97 | 1.31 | 0 |
| Puerto Rico                    | Female | Age-standardized | 1.26 | 1.08 | 1.43 | 0 |
| Puerto Rico                    | Both   | All Ages         | 2.2  | 2.1  | 2.3  | 0 |
| Puerto Rico                    | Both   | 15-49 years      | 1.39 | 1.25 | 1.53 | 0 |
| Puerto Rico                    | Both   | 50-69 years      | 1.16 | 1.04 | 1.27 | 0 |
| Puerto Rico                    | Both   | 70+ years        | 0.89 | 0.8  | 0.99 | 0 |
| Ireland                        | Both   | Age-standardized | 1.14 | 1.01 | 1.27 | 0 |
| Macedonia                      | Male   | All Ages         | 1.66 | 1.61 | 1.71 | 0 |

|             |        |                  |      |      |      |   |
|-------------|--------|------------------|------|------|------|---|
| Macedonia   | Male   | 15-49 years      | 1.01 | 0.96 | 1.07 | 0 |
| Macedonia   | Male   | 50-69 years      | 0.34 | 0.29 | 0.4  | 0 |
| Macedonia   | Male   | 70+ years        | 0.61 | 0.55 | 0.67 | 0 |
| Macedonia   | Male   | Age-standardized | 0.65 | 0.62 | 0.68 | 0 |
| Macedonia   | Female | All Ages         | 2.3  | 2.22 | 2.37 | 0 |
| Macedonia   | Female | 15-49 years      | 1.23 | 1.17 | 1.3  | 0 |
| Macedonia   | Female | 50-69 years      | 1.1  | 1.04 | 1.16 | 0 |
| Macedonia   | Female | 70+ years        | 1.33 | 1.27 | 1.39 | 0 |
| Macedonia   | Female | Age-standardized | 1.13 | 1.06 | 1.2  | 0 |
| Macedonia   | Both   | All Ages         | 1.92 | 1.86 | 1.97 | 0 |
| Macedonia   | Both   | 15-49 years      | 1.11 | 1.06 | 1.17 | 0 |
| Macedonia   | Both   | 50-69 years      | 0.69 | 0.65 | 0.74 | 0 |
| Macedonia   | Both   | 70+ years        | 0.89 | 0.84 | 0.93 | 0 |
| Macedonia   | Both   | Age-standardized | 1.14 | 1.12 | 1.17 | 0 |
| Sudan       | Both   | All Ages         | 1.28 | 1.2  | 1.35 | 0 |
| Latvia      | Male   | 15-49 years      | 0.76 | 0.63 | 0.89 | 0 |
| Latvia      | Male   | 50-69 years      | 0.28 | 0.25 | 0.3  | 0 |
| Latvia      | Male   | 70+ years        | 0.4  | 0.34 | 0.45 | 0 |
| Latvia      | Male   | Age-standardized | 0.45 | 0.38 | 0.53 | 0 |
| Latvia      | Female | All Ages         | 1.86 | 1.73 | 1.98 | 0 |
| Latvia      | Female | 15-49 years      | 0.97 | 0.85 | 1.1  | 0 |
| Latvia      | Female | 50-69 years      | 0.82 | 0.74 | 0.9  | 0 |
| Latvia      | Female | 70+ years        | 1.13 | 1    | 1.27 | 0 |
| Latvia      | Female | Age-standardized | 0.9  | 0.79 | 1    | 0 |
| Latvia      | Both   | All Ages         | 1.49 | 1.4  | 1.58 | 0 |
| Latvia      | Both   | 15-49 years      | 0.85 | 0.71 | 0.98 | 0 |
| Latvia      | Both   | 50-69 years      | 0.54 | 0.5  | 0.58 | 0 |
| Latvia      | Both   | 70+ years        | 0.88 | 0.76 | 0.99 | 0 |
| Latvia      | Both   | Age-standardized | 1.14 | 0.99 | 1.29 | 0 |
| Denmark     | Both   | All Ages         | 2.14 | 2.06 | 2.22 | 0 |
| Guatemala   | Male   | 15-49 years      | 1.34 | 1.32 | 1.36 | 0 |
| Guatemala   | Male   | 50-69 years      | 1.22 | 1.18 | 1.26 | 0 |
| Guatemala   | Male   | 70+ years        | 1.01 | 0.97 | 1.06 | 0 |
| Guatemala   | Male   | Age-standardized | 1.29 | 1.25 | 1.32 | 0 |
| Guatemala   | Female | All Ages         | 2.42 | 2.37 | 2.48 | 0 |
| Guatemala   | Female | 15-49 years      | 1.53 | 1.49 | 1.56 | 0 |
| Guatemala   | Female | 50-69 years      | 1.31 | 1.26 | 1.36 | 0 |
| Guatemala   | Female | 70+ years        | 1.2  | 1.14 | 1.26 | 0 |
| Guatemala   | Female | Age-standardized | 1.35 | 1.3  | 1.4  | 0 |
| Guatemala   | Both   | All Ages         | 2.25 | 2.18 | 2.32 | 0 |
| Guatemala   | Both   | 15-49 years      | 1.41 | 1.39 | 1.44 | 0 |
| Guatemala   | Both   | 50-69 years      | 1.19 | 1.15 | 1.24 | 0 |
| Guatemala   | Both   | 70+ years        | 1.03 | 0.98 | 1.08 | 0 |
| Guatemala   | Both   | Age-standardized | 1.13 | 1.07 | 1.19 | 0 |
| Netherlands | Both   | All Ages         | 1.37 | 1.28 | 1.47 | 0 |
| Kiribati    | Male   | 15-49 years      | 1.08 | 0.94 | 1.21 | 0 |
| Kiribati    | Male   | 50-69 years      | 0.89 | 0.77 | 1    | 0 |
| Kiribati    | Male   | 70+ years        | 0.77 | 0.67 | 0.88 | 0 |
| Kiribati    | Male   | Age-standardized | 0.97 | 0.85 | 1.09 | 0 |
| Kiribati    | Female | All Ages         | 1.72 | 1.59 | 1.85 | 0 |
| Kiribati    | Female | 15-49 years      | 1.37 | 1.22 | 1.52 | 0 |
| Kiribati    | Female | 50-69 years      | 1.29 | 1.15 | 1.42 | 0 |
| Kiribati    | Female | 70+ years        | 1.09 | 0.94 | 1.24 | 0 |
| Kiribati    | Female | Age-standardized | 1.28 | 1.14 | 1.43 | 0 |
| Kiribati    | Both   | All Ages         | 1.54 | 1.43 | 1.65 | 0 |
| Kiribati    | Both   | 15-49 years      | 1.22 | 1.08 | 1.36 | 0 |

|          |        |                  |      |      |      |   |
|----------|--------|------------------|------|------|------|---|
| Kiribati | Both   | 50-69 years      | 1.08 | 0.96 | 1.2  | 0 |
| Kiribati | Both   | 70+ years        | 0.94 | 0.81 | 1.07 | 0 |
| Greece   | Both   | Age-standardized | 1.13 | 0.96 | 1.29 | 0 |
| Guyana   | Male   | All Ages         | 2.14 | 2.08 | 2.21 | 0 |
| Guyana   | Male   | 15-49 years      | 1.47 | 1.3  | 1.63 | 0 |
| Guyana   | Male   | 50-69 years      | 1.1  | 1.03 | 1.17 | 0 |
| Guyana   | Male   | 70+ years        | 0.94 | 0.86 | 1.02 | 0 |
| Guyana   | Male   | Age-standardized | 1.19 | 1.11 | 1.27 | 0 |
| Guyana   | Female | All Ages         | 2.23 | 2.16 | 2.29 | 0 |
| Guyana   | Female | 15-49 years      | 1.44 | 1.27 | 1.61 | 0 |
| Guyana   | Female | 50-69 years      | 1.09 | 1.03 | 1.16 | 0 |
| Guyana   | Female | 70+ years        | 1.05 | 0.95 | 1.15 | 0 |
| Guyana   | Female | Age-standardized | 1.16 | 1.08 | 1.24 | 0 |
| Guyana   | Both   | All Ages         | 2.18 | 2.11 | 2.24 | 0 |
| Guyana   | Both   | 15-49 years      | 1.46 | 1.29 | 1.63 | 0 |
| Guyana   | Both   | 50-69 years      | 1.1  | 1.03 | 1.17 | 0 |
| Guyana   | Both   | 70+ years        | 0.95 | 0.87 | 1.04 | 0 |
| Brunei   | Both   | Age-standardized | 1.12 | 1.06 | 1.18 | 0 |
| Israel   | Male   | All Ages         | 1.65 | 1.51 | 1.79 | 0 |
| Israel   | Male   | 15-49 years      | 1.51 | 1.38 | 1.64 | 0 |
| Israel   | Male   | 50-69 years      | 1.19 | 1.06 | 1.32 | 0 |
| Israel   | Male   | 70+ years        | 0.94 | 0.83 | 1.04 | 0 |
| Israel   | Male   | Age-standardized | 1.27 | 1.14 | 1.4  | 0 |
| Israel   | Female | All Ages         | 1.8  | 1.66 | 1.93 | 0 |
| Israel   | Female | 15-49 years      | 1.6  | 1.49 | 1.72 | 0 |
| Israel   | Female | 50-69 years      | 1.43 | 1.33 | 1.53 | 0 |
| Israel   | Female | 70+ years        | 1.15 | 1.03 | 1.27 | 0 |
| Israel   | Female | Age-standardized | 1.44 | 1.33 | 1.56 | 0 |
| Israel   | Both   | All Ages         | 1.72 | 1.58 | 1.85 | 0 |
| Israel   | Both   | 15-49 years      | 1.56 | 1.44 | 1.68 | 0 |
| Israel   | Both   | 50-69 years      | 1.32 | 1.2  | 1.44 | 0 |
| Israel   | Both   | 70+ years        | 1.02 | 0.92 | 1.12 | 0 |
| Kiribati | Both   | Age-standardized | 1.12 | 0.99 | 1.25 | 0 |
| Iran     | Male   | All Ages         | 3.03 | 2.96 | 3.1  | 0 |
| Iran     | Male   | 15-49 years      | 1.87 | 1.76 | 1.97 | 0 |
| Iran     | Male   | 50-69 years      | 1.1  | 1.08 | 1.13 | 0 |
| Iran     | Male   | 70+ years        | 0.85 | 0.81 | 0.89 | 0 |
| Iran     | Male   | Age-standardized | 1.19 | 1.16 | 1.22 | 0 |
| Iran     | Female | All Ages         | 3.09 | 3.02 | 3.16 | 0 |
| Iran     | Female | 15-49 years      | 1.78 | 1.64 | 1.92 | 0 |
| Iran     | Female | 50-69 years      | 1.13 | 1.11 | 1.15 | 0 |
| Iran     | Female | 70+ years        | 0.97 | 0.95 | 0.99 | 0 |
| Iran     | Female | Age-standardized | 1.14 | 1.11 | 1.17 | 0 |
| Iran     | Both   | All Ages         | 3.05 | 2.98 | 3.12 | 0 |
| Iran     | Both   | 15-49 years      | 1.84 | 1.73 | 1.96 | 0 |
| Iran     | Both   | 50-69 years      | 1.03 | 1.01 | 1.05 | 0 |
| Iran     | Both   | 70+ years        | 0.87 | 0.82 | 0.93 | 0 |
| Guam     | Both   | Age-standardized | 1.12 | 1.02 | 1.21 | 0 |
| Tonga    | Male   | All Ages         | 1.39 | 1.35 | 1.43 | 0 |
| Tonga    | Male   | 15-49 years      | 1.17 | 1.12 | 1.21 | 0 |
| Tonga    | Male   | 50-69 years      | 0.61 | 0.58 | 0.65 | 0 |
| Tonga    | Male   | 70+ years        | 0.5  | 0.47 | 0.52 | 0 |
| Tonga    | Male   | Age-standardized | 0.73 | 0.7  | 0.75 | 0 |
| Tonga    | Female | All Ages         | 1.65 | 1.61 | 1.7  | 0 |
| Tonga    | Female | 15-49 years      | 1.43 | 1.37 | 1.49 | 0 |
| Tonga    | Female | 50-69 years      | 1.1  | 1.05 | 1.15 | 0 |

|             |        |                  |      |      |      |   |
|-------------|--------|------------------|------|------|------|---|
| Tonga       | Female | 70+ years        | 0.82 | 0.76 | 0.88 | 0 |
| Tonga       | Female | Age-standardized | 1.08 | 1.04 | 1.13 | 0 |
| Tonga       | Both   | All Ages         | 1.52 | 1.48 | 1.55 | 0 |
| Tonga       | Both   | 15-49 years      | 1.3  | 1.25 | 1.35 | 0 |
| Tonga       | Both   | 50-69 years      | 0.86 | 0.82 | 0.9  | 0 |
| Tonga       | Both   | 70+ years        | 0.66 | 0.62 | 0.7  | 0 |
| Azerbaijan  | Both   | Age-standardized | 1.1  | 0.97 | 1.23 | 0 |
| Liberia     | Male   | All Ages         | 0.85 | 0.63 | 1.06 | 0 |
| Liberia     | Male   | 15-49 years      | 0.95 | 0.71 | 1.18 | 0 |
| Liberia     | Male   | 50-69 years      | 0.84 | 0.69 | 0.98 | 0 |
| Liberia     | Male   | 70+ years        | 0.79 | 0.67 | 0.91 | 0 |
| Liberia     | Male   | Age-standardized | 0.9  | 0.76 | 1.05 | 0 |
| Liberia     | Female | All Ages         | 1.04 | 0.84 | 1.25 | 0 |
| Liberia     | Female | 15-49 years      | 1    | 0.77 | 1.23 | 0 |
| Liberia     | Female | 50-69 years      | 0.78 | 0.62 | 0.94 | 0 |
| Liberia     | Female | 70+ years        | 0.93 | 0.78 | 1.09 | 0 |
| Liberia     | Female | Age-standardized | 0.89 | 0.73 | 1.05 | 0 |
| Liberia     | Both   | All Ages         | 0.92 | 0.71 | 1.13 | 0 |
| Liberia     | Both   | 15-49 years      | 0.97 | 0.74 | 1.2  | 0 |
| Liberia     | Both   | 50-69 years      | 0.79 | 0.63 | 0.95 | 0 |
| Liberia     | Both   | 70+ years        | 0.71 | 0.59 | 0.84 | 0 |
| Libya       | Both   | Age-standardized | 1.1  | 1.04 | 1.16 | 0 |
| France      | Male   | All Ages         | 1.52 | 1.37 | 1.66 | 0 |
| France      | Male   | 15-49 years      | 1.31 | 1.17 | 1.46 | 0 |
| France      | Male   | 50-69 years      | 1.16 | 1.05 | 1.27 | 0 |
| France      | Male   | 70+ years        | 0.85 | 0.73 | 0.98 | 0 |
| France      | Male   | Age-standardized | 1.18 | 1.07 | 1.3  | 0 |
| France      | Female | All Ages         | 1.73 | 1.59 | 1.88 | 0 |
| France      | Female | 15-49 years      | 1.53 | 1.37 | 1.68 | 0 |
| France      | Female | 50-69 years      | 1.33 | 1.23 | 1.44 | 0 |
| France      | Female | 70+ years        | 1.19 | 1.07 | 1.31 | 0 |
| France      | Female | Age-standardized | 1.38 | 1.26 | 1.49 | 0 |
| France      | Both   | All Ages         | 1.58 | 1.44 | 1.73 | 0 |
| France      | Both   | 15-49 years      | 1.36 | 1.22 | 1.5  | 0 |
| France      | Both   | 50-69 years      | 1.23 | 1.12 | 1.35 | 0 |
| France      | Both   | 70+ years        | 1.11 | 0.98 | 1.23 | 0 |
| Norway      | Both   | Age-standardized | 1.1  | 0.98 | 1.22 | 0 |
| Serbia      | Male   | All Ages         | 1.05 | 1.01 | 1.09 | 0 |
| Serbia      | Male   | 15-49 years      | 0.77 | 0.69 | 0.85 | 0 |
| Serbia      | Male   | 50-69 years      | 0.17 | 0.1  | 0.24 | 0 |
| Serbia      | Male   | 70+ years        | 0.38 | 0.32 | 0.43 | 0 |
| Serbia      | Male   | Age-standardized | 0.49 | 0.43 | 0.54 | 0 |
| Serbia      | Female | All Ages         | 1.83 | 1.75 | 1.9  | 0 |
| Serbia      | Female | 15-49 years      | 0.95 | 0.87 | 1.03 | 0 |
| Serbia      | Female | 50-69 years      | 0.86 | 0.78 | 0.94 | 0 |
| Serbia      | Female | 70+ years        | 1.15 | 1.09 | 1.2  | 0 |
| Serbia      | Female | Age-standardized | 0.9  | 0.81 | 0.99 | 0 |
| Serbia      | Both   | All Ages         | 1.37 | 1.32 | 1.42 | 0 |
| Serbia      | Both   | 15-49 years      | 0.83 | 0.74 | 0.91 | 0 |
| Serbia      | Both   | 50-69 years      | 0.47 | 0.4  | 0.54 | 0 |
| Serbia      | Both   | 70+ years        | 0.75 | 0.71 | 0.79 | 0 |
| Switzerland | Both   | Age-standardized | 1.09 | 1.01 | 1.17 | 0 |
| Netherlands | Male   | All Ages         | 1.47 | 1.4  | 1.55 | 0 |
| Netherlands | Male   | 15-49 years      | 1.18 | 1.05 | 1.32 | 0 |
| Netherlands | Male   | 50-69 years      | 1.1  | 1.02 | 1.17 | 0 |
| Netherlands | Male   | 70+ years        | 0.83 | 0.76 | 0.9  | 0 |

|             |        |                  |      |      |      |       |
|-------------|--------|------------------|------|------|------|-------|
| Netherlands | Male   | Age-standardized | 1.1  | 1.02 | 1.18 | 0     |
| Netherlands | Female | All Ages         | 1.46 | 1.44 | 1.48 | 0     |
| Netherlands | Female | 15-49 years      | 1.33 | 1.24 | 1.42 | 0     |
| Netherlands | Female | 50-69 years      | 1.04 | 1    | 1.08 | 0     |
| Netherlands | Female | 70+ years        | 0.84 | 0.78 | 0.89 | 0     |
| Netherlands | Female | Age-standardized | 1.15 | 1.12 | 1.18 | 0     |
| Netherlands | Both   | All Ages         | 1.47 | 1.42 | 1.52 | 0     |
| Netherlands | Both   | 15-49 years      | 1.2  | 1.08 | 1.32 | 0     |
| Netherlands | Both   | 50-69 years      | 1.12 | 1.06 | 1.18 | 0     |
| Netherlands | Both   | 70+ years        | 1    | 0.96 | 1.04 | 0     |
| Mexico      | Both   | Age-standardized | 1.09 | 1.03 | 1.14 | 0     |
| Lesotho     | Male   | All Ages         | 1.45 | 1.43 | 1.48 | 0     |
| Lesotho     | Male   | 15-49 years      | 1.05 | 0.98 | 1.12 | 0     |
| Lesotho     | Male   | 50-69 years      | 0.78 | 0.76 | 0.79 | 0     |
| Lesotho     | Male   | 70+ years        | 0.67 | 0.65 | 0.69 | 0     |
| Lesotho     | Male   | Age-standardized | 0.84 | 0.82 | 0.85 | 0     |
| Lesotho     | Female | All Ages         | 1.61 | 1.58 | 1.63 | 0     |
| Lesotho     | Female | 15-49 years      | 1.11 | 1.04 | 1.17 | 0     |
| Lesotho     | Female | 50-69 years      | 0.85 | 0.81 | 0.89 | 0     |
| Lesotho     | Female | 70+ years        | 0.97 | 0.92 | 1.01 | 0     |
| Lesotho     | Female | Age-standardized | 0.92 | 0.9  | 0.95 | 0     |
| Lesotho     | Both   | All Ages         | 1.51 | 1.48 | 1.53 | 0     |
| Lesotho     | Both   | 15-49 years      | 1.1  | 1.03 | 1.17 | 0     |
| Lesotho     | Both   | 50-69 years      | 0.66 | 0.65 | 0.68 | 0     |
| Lesotho     | Both   | 70+ years        | 0.7  | 0.67 | 0.73 | 0     |
| Bangladesh  | Both   | Age-standardized | 1.09 | 1.01 | 1.17 | 0     |
| Ukraine     | Male   | All Ages         | 1.03 | 1    | 1.06 | 0     |
| Ukraine     | Male   | 15-49 years      | 0.72 | 0.59 | 0.85 | 0     |
| Ukraine     | Male   | 50-69 years      | 0.14 | 0.06 | 0.23 | 0.002 |
| Ukraine     | Male   | 70+ years        | 0.36 | 0.34 | 0.37 | 0     |
| Ukraine     | Male   | Age-standardized | 0.43 | 0.35 | 0.5  | 0     |
| Ukraine     | Female | All Ages         | 1.68 | 1.58 | 1.78 | 0     |
| Ukraine     | Female | 15-49 years      | 1.22 | 1.11 | 1.33 | 0     |
| Ukraine     | Female | 50-69 years      | 0.89 | 0.81 | 0.98 | 0     |
| Ukraine     | Female | 70+ years        | 1.32 | 1.2  | 1.44 | 0     |
| Ukraine     | Female | Age-standardized | 1.13 | 1.02 | 1.24 | 0     |
| Ukraine     | Both   | All Ages         | 1.28 | 1.23 | 1.34 | 0     |
| Ukraine     | Both   | 15-49 years      | 0.87 | 0.75 | 1    | 0     |
| Ukraine     | Both   | 50-69 years      | 0.45 | 0.38 | 0.53 | 0     |
| Ukraine     | Both   | 70+ years        | 1.03 | 0.96 | 1.1  | 0     |
| Mali        | Both   | Age-standardized | 1.08 | 1.06 | 1.09 | 0     |
| Ecuador     | Male   | All Ages         | 1.84 | 1.78 | 1.91 | 0     |
| Ecuador     | Male   | 15-49 years      | 1.18 | 1.13 | 1.24 | 0     |
| Ecuador     | Male   | 50-69 years      | 0.84 | 0.79 | 0.89 | 0     |
| Ecuador     | Male   | 70+ years        | 0.67 | 0.61 | 0.73 | 0     |
| Ecuador     | Male   | Age-standardized | 0.91 | 0.86 | 0.96 | 0     |
| Ecuador     | Female | All Ages         | 1.6  | 1.51 | 1.69 | 0     |
| Ecuador     | Female | 15-49 years      | 0.88 | 0.79 | 0.96 | 0     |
| Ecuador     | Female | 50-69 years      | 0.62 | 0.55 | 0.7  | 0     |
| Ecuador     | Female | 70+ years        | 0.53 | 0.44 | 0.62 | 0     |
| Ecuador     | Female | Age-standardized | 0.62 | 0.55 | 0.7  | 0     |
| Ecuador     | Both   | All Ages         | 1.74 | 1.67 | 1.82 | 0     |
| Ecuador     | Both   | 15-49 years      | 1.06 | 1    | 1.13 | 0     |
| Ecuador     | Both   | 50-69 years      | 0.74 | 0.68 | 0.8  | 0     |
| Ecuador     | Both   | 70+ years        | 0.6  | 0.52 | 0.67 | 0     |
| Qatar       | Both   | Age-standardized | 1.08 | 1.05 | 1.11 | 0     |

|               |        |                  |      |      |      |   |
|---------------|--------|------------------|------|------|------|---|
| Myanmar       | Male   | All Ages         | 1.97 | 1.88 | 2.07 | 0 |
| Myanmar       | Male   | 15-49 years      | 1.43 | 1.34 | 1.52 | 0 |
| Myanmar       | Male   | 50-69 years      | 1.12 | 1.02 | 1.21 | 0 |
| Myanmar       | Male   | 70+ years        | 0.93 | 0.85 | 1.01 | 0 |
| Myanmar       | Male   | Age-standardized | 1.12 | 1.03 | 1.22 | 0 |
| Myanmar       | Female | All Ages         | 2.07 | 2.01 | 2.13 | 0 |
| Myanmar       | Female | 15-49 years      | 1.41 | 1.36 | 1.45 | 0 |
| Myanmar       | Female | 50-69 years      | 1.09 | 1.06 | 1.13 | 0 |
| Myanmar       | Female | 70+ years        | 0.89 | 0.85 | 0.93 | 0 |
| Myanmar       | Female | Age-standardized | 1.04 | 1    | 1.09 | 0 |
| Myanmar       | Both   | All Ages         | 2    | 1.92 | 2.08 | 0 |
| Myanmar       | Both   | 15-49 years      | 1.41 | 1.34 | 1.48 | 0 |
| Myanmar       | Both   | 50-69 years      | 1.07 | 1    | 1.14 | 0 |
| Myanmar       | Both   | 70+ years        | 0.86 | 0.81 | 0.92 | 0 |
| Saint Lucia   | Both   | Age-standardized | 1.08 | 0.97 | 1.18 | 0 |
| Nepal         | Male   | All Ages         | 2.46 | 2.25 | 2.66 | 0 |
| Nepal         | Male   | 15-49 years      | 1.67 | 1.51 | 1.83 | 0 |
| Nepal         | Male   | 50-69 years      | 1.58 | 1.42 | 1.73 | 0 |
| Nepal         | Male   | 70+ years        | 1.61 | 1.47 | 1.75 | 0 |
| Nepal         | Male   | Age-standardized | 1.63 | 1.48 | 1.79 | 0 |
| Nepal         | Female | All Ages         | 2.56 | 2.28 | 2.83 | 0 |
| Nepal         | Female | 15-49 years      | 1.67 | 1.46 | 1.89 | 0 |
| Nepal         | Female | 50-69 years      | 1.54 | 1.35 | 1.73 | 0 |
| Nepal         | Female | 70+ years        | 1.65 | 1.48 | 1.83 | 0 |
| Nepal         | Female | Age-standardized | 1.58 | 1.39 | 1.77 | 0 |
| Nepal         | Both   | All Ages         | 2.47 | 2.24 | 2.7  | 0 |
| Nepal         | Both   | 15-49 years      | 1.62 | 1.45 | 1.8  | 0 |
| Nepal         | Both   | 50-69 years      | 1.51 | 1.35 | 1.68 | 0 |
| Nepal         | Both   | 70+ years        | 1.58 | 1.43 | 1.73 | 0 |
| Cote d'Ivoire | Both   | Age-standardized | 1.08 | 0.94 | 1.22 | 0 |
| Namibia       | Male   | All Ages         | 1.53 | 1.45 | 1.61 | 0 |
| Namibia       | Male   | 15-49 years      | 1.2  | 1.14 | 1.26 | 0 |
| Namibia       | Male   | 50-69 years      | 0.92 | 0.86 | 0.97 | 0 |
| Namibia       | Male   | 70+ years        | 0.89 | 0.84 | 0.93 | 0 |
| Namibia       | Male   | Age-standardized | 0.99 | 0.94 | 1.04 | 0 |
| Namibia       | Female | All Ages         | 1.64 | 1.55 | 1.72 | 0 |
| Namibia       | Female | 15-49 years      | 1.18 | 1.13 | 1.24 | 0 |
| Namibia       | Female | 50-69 years      | 0.98 | 0.95 | 1.02 | 0 |
| Namibia       | Female | 70+ years        | 1.08 | 1.04 | 1.13 | 0 |
| Namibia       | Female | Age-standardized | 1.03 | 0.99 | 1.07 | 0 |
| Namibia       | Both   | All Ages         | 1.57 | 1.5  | 1.65 | 0 |
| Namibia       | Both   | 15-49 years      | 1.2  | 1.15 | 1.26 | 0 |
| Namibia       | Both   | 50-69 years      | 0.89 | 0.85 | 0.93 | 0 |
| Namibia       | Both   | 70+ years        | 0.89 | 0.85 | 0.93 | 0 |
| Portugal      | Both   | Age-standardized | 1.06 | 0.92 | 1.21 | 0 |
| Mauritania    | Male   | All Ages         | 1.27 | 1.25 | 1.3  | 0 |
| Mauritania    | Male   | 15-49 years      | 1.09 | 1.04 | 1.14 | 0 |
| Mauritania    | Male   | 50-69 years      | 0.99 | 0.97 | 1.01 | 0 |
| Mauritania    | Male   | 70+ years        | 0.9  | 0.86 | 0.93 | 0 |
| Mauritania    | Male   | Age-standardized | 1.04 | 1.01 | 1.07 | 0 |
| Mauritania    | Female | All Ages         | 1.16 | 1.14 | 1.19 | 0 |
| Mauritania    | Female | 15-49 years      | 1.07 | 1.01 | 1.12 | 0 |
| Mauritania    | Female | 50-69 years      | 0.93 | 0.9  | 0.97 | 0 |
| Mauritania    | Female | 70+ years        | 1.08 | 1.05 | 1.12 | 0 |
| Mauritania    | Female | Age-standardized | 1.03 | 0.99 | 1.07 | 0 |
| Mauritania    | Both   | All Ages         | 1.22 | 1.2  | 1.25 | 0 |

|                      |        |                  |      |      |      |   |
|----------------------|--------|------------------|------|------|------|---|
| Mauritania           | Both   | 15-49 years      | 1.07 | 1.02 | 1.12 | 0 |
| Mauritania           | Both   | 50-69 years      | 0.98 | 0.94 | 1.01 | 0 |
| Mauritania           | Both   | 70+ years        | 1.08 | 1.04 | 1.13 | 0 |
| Myanmar              | Both   | Age-standardized | 1.06 | 0.99 | 1.13 | 0 |
| Georgia              | Male   | All Ages         | 1.4  | 1.36 | 1.45 | 0 |
| Georgia              | Male   | 15-49 years      | 1.01 | 0.94 | 1.07 | 0 |
| Georgia              | Male   | 50-69 years      | 0.42 | 0.34 | 0.5  | 0 |
| Georgia              | Male   | 70+ years        | 0.83 | 0.78 | 0.88 | 0 |
| Georgia              | Male   | Age-standardized | 0.72 | 0.66 | 0.79 | 0 |
| Georgia              | Female | All Ages         | 1.7  | 1.61 | 1.8  | 0 |
| Georgia              | Female | 15-49 years      | 1.07 | 1.01 | 1.13 | 0 |
| Georgia              | Female | 50-69 years      | 0.82 | 0.71 | 0.94 | 0 |
| Georgia              | Female | 70+ years        | 1.19 | 1.11 | 1.27 | 0 |
| Georgia              | Female | Age-standardized | 0.95 | 0.89 | 1.02 | 0 |
| Georgia              | Both   | All Ages         | 1.55 | 1.48 | 1.62 | 0 |
| Georgia              | Both   | 15-49 years      | 1.06 | 1.02 | 1.1  | 0 |
| Georgia              | Both   | 50-69 years      | 0.61 | 0.52 | 0.7  | 0 |
| Georgia              | Both   | 70+ years        | 1.12 | 1.04 | 1.2  | 0 |
| Cuba                 | Both   | Age-standardized | 1.06 | 0.98 | 1.14 | 0 |
| Cape Verde           | Male   | All Ages         | 2.75 | 2.58 | 2.92 | 0 |
| Cape Verde           | Male   | 15-49 years      | 1.73 | 1.66 | 1.79 | 0 |
| Cape Verde           | Male   | 50-69 years      | 1    | 0.98 | 1.03 | 0 |
| Cape Verde           | Male   | 70+ years        | 1.06 | 1.01 | 1.1  | 0 |
| Cape Verde           | Male   | Age-standardized | 1.18 | 1.14 | 1.22 | 0 |
| Cape Verde           | Female | All Ages         | 2.05 | 1.89 | 2.22 | 0 |
| Cape Verde           | Female | 15-49 years      | 1.22 | 1.12 | 1.31 | 0 |
| Cape Verde           | Female | 50-69 years      | 0.8  | 0.73 | 0.87 | 0 |
| Cape Verde           | Female | 70+ years        | 1.09 | 1.03 | 1.15 | 0 |
| Cape Verde           | Female | Age-standardized | 0.97 | 0.92 | 1.02 | 0 |
| Cape Verde           | Both   | All Ages         | 2.52 | 2.35 | 2.69 | 0 |
| Cape Verde           | Both   | 15-49 years      | 1.65 | 1.58 | 1.72 | 0 |
| Cape Verde           | Both   | 50-69 years      | 1.01 | 0.94 | 1.07 | 0 |
| Cape Verde           | Both   | 70+ years        | 1.03 | 1    | 1.06 | 0 |
| Bhutan               | Both   | Age-standardized | 1.05 | 1.01 | 1.08 | 0 |
| Honduras             | Male   | All Ages         | 2.23 | 2.17 | 2.3  | 0 |
| Honduras             | Male   | 15-49 years      | 1.42 | 1.37 | 1.47 | 0 |
| Honduras             | Male   | 50-69 years      | 1.26 | 1.16 | 1.35 | 0 |
| Honduras             | Male   | 70+ years        | 1.06 | 0.98 | 1.14 | 0 |
| Honduras             | Male   | Age-standardized | 1.26 | 1.19 | 1.34 | 0 |
| Honduras             | Female | All Ages         | 2.43 | 2.36 | 2.5  | 0 |
| Honduras             | Female | 15-49 years      | 1.6  | 1.53 | 1.67 | 0 |
| Honduras             | Female | 50-69 years      | 1.35 | 1.27 | 1.44 | 0 |
| Honduras             | Female | 70+ years        | 1.27 | 1.19 | 1.34 | 0 |
| Honduras             | Female | Age-standardized | 1.39 | 1.3  | 1.48 | 0 |
| Honduras             | Both   | All Ages         | 2.3  | 2.24 | 2.37 | 0 |
| Honduras             | Both   | 15-49 years      | 1.48 | 1.42 | 1.54 | 0 |
| Honduras             | Both   | 50-69 years      | 1.27 | 1.18 | 1.37 | 0 |
| Honduras             | Both   | 70+ years        | 1.14 | 1.07 | 1.22 | 0 |
| Dominican Republic   | Both   | Age-standardized | 1.05 | 1.01 | 1.1  | 0 |
| Virgin Islands, U.S. | Male   | All Ages         | 2.06 | 1.97 | 2.14 | 0 |
| Virgin Islands, U.S. | Male   | 15-49 years      | 1.08 | 1    | 1.16 | 0 |
| Virgin Islands, U.S. | Male   | 50-69 years      | 0.91 | 0.86 | 0.96 | 0 |
| Virgin Islands, U.S. | Male   | 70+ years        | 0.65 | 0.62 | 0.67 | 0 |
| Virgin Islands, U.S. | Male   | Age-standardized | 0.89 | 0.84 | 0.95 | 0 |
| Virgin Islands, U.S. | Female | All Ages         | 2.01 | 1.89 | 2.13 | 0 |
| Virgin Islands, U.S. | Female | 15-49 years      | 0.87 | 0.74 | 1    | 0 |



|                          |        |                  |      |       |      |       |
|--------------------------|--------|------------------|------|-------|------|-------|
| Virgin Islands, U.S.     | Female | 50-69 years      | 0.77 | 0.68  | 0.86 | 0     |
| Virgin Islands, U.S.     | Female | 70+ years        | 0.54 | 0.47  | 0.61 | 0     |
| Virgin Islands, U.S.     | Female | Age-standardized | 0.69 | 0.59  | 0.8  | 0     |
| Virgin Islands, U.S.     | Both   | All Ages         | 2.03 | 1.93  | 2.12 | 0     |
| Virgin Islands, U.S.     | Both   | 15-49 years      | 0.99 | 0.9   | 1.08 | 0     |
| Virgin Islands, U.S.     | Both   | 50-69 years      | 0.83 | 0.76  | 0.9  | 0     |
| Virgin Islands, U.S.     | Both   | 70+ years        | 0.61 | 0.57  | 0.65 | 0     |
| Antigua and Barbuda      | Both   | Age-standardized | 1.05 | 0.99  | 1.11 | 0     |
| Mongolia                 | Male   | All Ages         | 1.78 | 1.7   | 1.86 | 0     |
| Mongolia                 | Male   | 15-49 years      | 1.06 | 0.96  | 1.17 | 0     |
| Mongolia                 | Male   | 50-69 years      | 0.11 | 0.06  | 0.16 | 0     |
| Mongolia                 | Male   | 70+ years        | 0.46 | 0.43  | 0.48 | 0     |
| Mongolia                 | Male   | Age-standardized | 0.46 | 0.41  | 0.51 | 0     |
| Mongolia                 | Female | All Ages         | 1.59 | 1.5   | 1.68 | 0     |
| Mongolia                 | Female | 15-49 years      | 0.7  | 0.59  | 0.81 | 0     |
| Mongolia                 | Female | 50-69 years      | 0.01 | -0.05 | 0.07 | 0.698 |
| Mongolia                 | Female | 70+ years        | 0.77 | 0.67  | 0.86 | 0     |
| Mongolia                 | Female | Age-standardized | 0.33 | 0.25  | 0.4  | 0     |
| Mongolia                 | Both   | All Ages         | 1.7  | 1.61  | 1.78 | 0     |
| Mongolia                 | Both   | 15-49 years      | 0.92 | 0.81  | 1.03 | 0     |
| Mongolia                 | Both   | 50-69 years      | 0.02 | -0.03 | 0.08 | 0.355 |
| Mongolia                 | Both   | 70+ years        | 0.63 | 0.57  | 0.69 | 0     |
| Mauritania               | Both   | Age-standardized | 1.04 | 1.01  | 1.08 | 0     |
| Central African Republic | Male   | All Ages         | 0.85 | 0.76  | 0.94 | 0     |
| Central African Republic | Male   | 15-49 years      | 0.52 | 0.49  | 0.55 | 0     |
| Central African Republic | Male   | 50-69 years      | 0.39 | 0.36  | 0.42 | 0     |
| Central African Republic | Male   | 70+ years        | 0.42 | 0.39  | 0.45 | 0     |
| Central African Republic | Male   | Age-standardized | 0.43 | 0.4   | 0.46 | 0     |
| Central African Republic | Female | All Ages         | 0.73 | 0.58  | 0.88 | 0     |
| Central African Republic | Female | 15-49 years      | 0.48 | 0.41  | 0.55 | 0     |
| Central African Republic | Female | 50-69 years      | 0.47 | 0.4   | 0.54 | 0     |
| Central African Republic | Female | 70+ years        | 0.65 | 0.58  | 0.72 | 0     |
| Central African Republic | Female | Age-standardized | 0.53 | 0.46  | 0.6  | 0     |
| Central African Republic | Both   | All Ages         | 0.81 | 0.7   | 0.92 | 0     |
| Central African Republic | Both   | 15-49 years      | 0.52 | 0.49  | 0.56 | 0     |
| Central African Republic | Both   | 50-69 years      | 0.47 | 0.41  | 0.52 | 0     |
| Central African Republic | Both   | 70+ years        | 0.43 | 0.38  | 0.48 | 0     |
| Slovenia                 | Both   | Age-standardized | 1.04 | 1     | 1.09 | 0     |
| Guinea-Bissau            | Male   | All Ages         | 1.61 | 1.5   | 1.72 | 0     |
| Guinea-Bissau            | Male   | 15-49 years      | 1.38 | 1.29  | 1.47 | 0     |
| Guinea-Bissau            | Male   | 50-69 years      | 1.2  | 1.11  | 1.28 | 0     |
| Guinea-Bissau            | Male   | 70+ years        | 1.19 | 1.11  | 1.27 | 0     |
| Guinea-Bissau            | Male   | Age-standardized | 1.27 | 1.18  | 1.35 | 0     |
| Guinea-Bissau            | Female | All Ages         | 1.43 | 1.34  | 1.51 | 0     |
| Guinea-Bissau            | Female | 15-49 years      | 1.11 | 1.04  | 1.18 | 0     |
| Guinea-Bissau            | Female | 50-69 years      | 0.99 | 0.93  | 1.05 | 0     |
| Guinea-Bissau            | Female | 70+ years        | 1.14 | 1.08  | 1.21 | 0     |
| Guinea-Bissau            | Female | Age-standardized | 1.07 | 1     | 1.13 | 0     |
| Guinea-Bissau            | Both   | All Ages         | 1.54 | 1.44  | 1.64 | 0     |
| Guinea-Bissau            | Both   | 15-49 years      | 1.28 | 1.2   | 1.35 | 0     |
| Guinea-Bissau            | Both   | 50-69 years      | 1.12 | 1.04  | 1.2  | 0     |
| Guinea-Bissau            | Both   | 70+ years        | 0.97 | 0.9   | 1.05 | 0     |
| Austria                  | Both   | Age-standardized | 1.03 | 0.92  | 1.15 | 0     |
| Niger                    | Male   | All Ages         | 0.43 | 0.39  | 0.48 | 0     |
| Niger                    | Male   | 15-49 years      | 0.68 | 0.59  | 0.78 | 0     |
| Niger                    | Male   | 50-69 years      | 0.77 | 0.69  | 0.85 | 0     |

|                                  |        |                  |      |      |      |   |
|----------------------------------|--------|------------------|------|------|------|---|
| Niger                            | Male   | 70+ years        | 0.75 | 0.69 | 0.82 | 0 |
| Niger                            | Male   | Age-standardized | 0.81 | 0.74 | 0.88 | 0 |
| Niger                            | Female | All Ages         | 0.51 | 0.46 | 0.55 | 0 |
| Niger                            | Female | 15-49 years      | 0.63 | 0.56 | 0.69 | 0 |
| Niger                            | Female | 50-69 years      | 0.61 | 0.56 | 0.65 | 0 |
| Niger                            | Female | 70+ years        | 0.75 | 0.72 | 0.79 | 0 |
| Niger                            | Female | Age-standardized | 0.67 | 0.63 | 0.7  | 0 |
| Niger                            | Both   | All Ages         | 0.46 | 0.42 | 0.5  | 0 |
| Niger                            | Both   | 15-49 years      | 0.67 | 0.58 | 0.75 | 0 |
| Niger                            | Both   | 50-69 years      | 0.63 | 0.56 | 0.71 | 0 |
| Niger                            | Both   | 70+ years        | 0.66 | 0.61 | 0.71 | 0 |
| Belgium                          | Both   | Age-standardized | 1.03 | 0.89 | 1.18 | 0 |
| Saint Vincent and the Grenadines | Male   | All Ages         | 2.51 | 2.41 | 2.61 | 0 |
| Saint Vincent and the Grenadines | Male   | 15-49 years      | 1.6  | 1.47 | 1.73 | 0 |
| Saint Vincent and the Grenadines | Male   | 50-69 years      | 0.81 | 0.75 | 0.86 | 0 |
| Saint Vincent and the Grenadines | Male   | 70+ years        | 0.6  | 0.55 | 0.66 | 0 |
| Saint Vincent and the Grenadines | Male   | Age-standardized | 0.97 | 0.9  | 1.03 | 0 |
| Saint Vincent and the Grenadines | Female | All Ages         | 3.18 | 3.04 | 3.32 | 0 |
| Saint Vincent and the Grenadines | Female | 15-49 years      | 2.44 | 2.29 | 2.59 | 0 |
| Saint Vincent and the Grenadines | Female | 50-69 years      | 1.66 | 1.55 | 1.76 | 0 |
| Saint Vincent and the Grenadines | Female | 70+ years        | 1.57 | 1.45 | 1.69 | 0 |
| Saint Vincent and the Grenadines | Female | Age-standardized | 1.8  | 1.68 | 1.92 | 0 |
| Saint Vincent and the Grenadines | Both   | All Ages         | 2.8  | 2.69 | 2.91 | 0 |
| Saint Vincent and the Grenadines | Both   | 15-49 years      | 1.93 | 1.8  | 2.06 | 0 |
| Saint Vincent and the Grenadines | Both   | 50-69 years      | 1.24 | 1.17 | 1.31 | 0 |
| Saint Vincent and the Grenadines | Both   | 70+ years        | 1.16 | 1.07 | 1.24 | 0 |
| Paraguay                         | Both   | Age-standardized | 1.02 | 0.96 | 1.08 | 0 |
| Tanzania                         | Male   | All Ages         | 1.1  | 1.06 | 1.14 | 0 |
| Tanzania                         | Male   | 15-49 years      | 1.03 | 0.99 | 1.07 | 0 |
| Tanzania                         | Male   | 50-69 years      | 0.79 | 0.76 | 0.83 | 0 |
| Tanzania                         | Male   | 70+ years        | 0.81 | 0.76 | 0.86 | 0 |
| Tanzania                         | Male   | Age-standardized | 0.86 | 0.82 | 0.89 | 0 |
| Tanzania                         | Female | All Ages         | 0.68 | 0.63 | 0.72 | 0 |
| Tanzania                         | Female | 15-49 years      | 0.62 | 0.58 | 0.66 | 0 |
| Tanzania                         | Female | 50-69 years      | 0.37 | 0.33 | 0.4  | 0 |
| Tanzania                         | Female | 70+ years        | 0.51 | 0.45 | 0.56 | 0 |
| Tanzania                         | Female | Age-standardized | 0.45 | 0.42 | 0.49 | 0 |
| Tanzania                         | Both   | All Ages         | 0.93 | 0.9  | 0.97 | 0 |
| Tanzania                         | Both   | 15-49 years      | 0.88 | 0.84 | 0.91 | 0 |
| Tanzania                         | Both   | 50-69 years      | 0.65 | 0.61 | 0.69 | 0 |
| Tanzania                         | Both   | 70+ years        | 0.57 | 0.53 | 0.62 | 0 |
| Egypt                            | Both   | Age-standardized | 1.02 | 1.01 | 1.03 | 0 |
| Burkina Faso                     | Male   | All Ages         | 1.37 | 1.31 | 1.43 | 0 |
| Burkina Faso                     | Male   | 15-49 years      | 1.23 | 1.18 | 1.29 | 0 |
| Burkina Faso                     | Male   | 50-69 years      | 1.05 | 1    | 1.09 | 0 |
| Burkina Faso                     | Male   | 70+ years        | 1.05 | 1.02 | 1.09 | 0 |
| Burkina Faso                     | Male   | Age-standardized | 1.11 | 1.07 | 1.15 | 0 |
| Burkina Faso                     | Female | All Ages         | 0.95 | 0.9  | 1    | 0 |
| Burkina Faso                     | Female | 15-49 years      | 0.81 | 0.78 | 0.85 | 0 |
| Burkina Faso                     | Female | 50-69 years      | 0.67 | 0.64 | 0.71 | 0 |
| Burkina Faso                     | Female | 70+ years        | 0.81 | 0.78 | 0.83 | 0 |
| Burkina Faso                     | Female | Age-standardized | 0.77 | 0.74 | 0.8  | 0 |
| Burkina Faso                     | Both   | All Ages         | 1.22 | 1.17 | 1.27 | 0 |
| Burkina Faso                     | Both   | 15-49 years      | 1.12 | 1.07 | 1.16 | 0 |
| Burkina Faso                     | Both   | 50-69 years      | 0.86 | 0.83 | 0.89 | 0 |
| Burkina Faso                     | Both   | 70+ years        | 0.89 | 0.88 | 0.9  | 0 |

|                  |        |                  |      |      |      |   |
|------------------|--------|------------------|------|------|------|---|
| Togo             | Both   | Age-standardized | 1.02 | 0.97 | 1.07 | 0 |
| Bermuda          | Male   | All Ages         | 1.71 | 1.66 | 1.77 | 0 |
| Bermuda          | Male   | 15-49 years      | 1.25 | 1.15 | 1.34 | 0 |
| Bermuda          | Male   | 50-69 years      | 0.89 | 0.85 | 0.93 | 0 |
| Bermuda          | Male   | 70+ years        | 0.7  | 0.66 | 0.75 | 0 |
| Bermuda          | Male   | Age-standardized | 0.97 | 0.92 | 1.02 | 0 |
| Bermuda          | Female | All Ages         | 1.85 | 1.8  | 1.91 | 0 |
| Bermuda          | Female | 15-49 years      | 1.26 | 1.15 | 1.37 | 0 |
| Bermuda          | Female | 50-69 years      | 1.02 | 0.97 | 1.08 | 0 |
| Bermuda          | Female | 70+ years        | 0.85 | 0.77 | 0.93 | 0 |
| Bermuda          | Female | Age-standardized | 1.05 | 0.98 | 1.12 | 0 |
| Bermuda          | Both   | All Ages         | 1.77 | 1.72 | 1.82 | 0 |
| Bermuda          | Both   | 15-49 years      | 1.25 | 1.15 | 1.35 | 0 |
| Bermuda          | Both   | 50-69 years      | 0.95 | 0.9  | 1    | 0 |
| Bermuda          | Both   | 70+ years        | 0.81 | 0.74 | 0.88 | 0 |
| Cyprus           | Both   | Age-standardized | 1.02 | 0.85 | 1.18 | 0 |
| Marshall Islands | Male   | All Ages         | 2.16 | 2.12 | 2.21 | 0 |
| Marshall Islands | Male   | 15-49 years      | 1.12 | 1.07 | 1.17 | 0 |
| Marshall Islands | Male   | 50-69 years      | 0.72 | 0.7  | 0.74 | 0 |
| Marshall Islands | Male   | 70+ years        | 0.58 | 0.55 | 0.61 | 0 |
| Marshall Islands | Male   | Age-standardized | 0.78 | 0.76 | 0.8  | 0 |
| Marshall Islands | Female | All Ages         | 2.44 | 2.37 | 2.52 | 0 |
| Marshall Islands | Female | 15-49 years      | 1.43 | 1.33 | 1.53 | 0 |
| Marshall Islands | Female | 50-69 years      | 1.03 | 0.96 | 1.1  | 0 |
| Marshall Islands | Female | 70+ years        | 0.88 | 0.81 | 0.94 | 0 |
| Marshall Islands | Female | Age-standardized | 1.02 | 0.97 | 1.08 | 0 |
| Marshall Islands | Both   | All Ages         | 2.29 | 2.24 | 2.33 | 0 |
| Marshall Islands | Both   | 15-49 years      | 1.26 | 1.19 | 1.33 | 0 |
| Marshall Islands | Both   | 50-69 years      | 0.85 | 0.81 | 0.89 | 0 |
| Marshall Islands | Both   | 70+ years        | 0.74 | 0.7  | 0.79 | 0 |
| Papua New Guinea | Both   | Age-standardized | 1.02 | 0.99 | 1.06 | 0 |
| High-middle SDI  | Male   | All Ages         | 2.05 | 2.04 | 2.07 | 0 |
| High-middle SDI  | Male   | 15-49 years      | 1.5  | 1.41 | 1.58 | 0 |
| High-middle SDI  | Male   | 50-69 years      | 0.86 | 0.8  | 0.93 | 0 |
| High-middle SDI  | Male   | 70+ years        | 0.68 | 0.65 | 0.7  | 0 |
| High-middle SDI  | Male   | Age-standardized | 1.05 | 1    | 1.1  | 0 |
| High-middle SDI  | Female | All Ages         | 2.36 | 2.35 | 2.37 | 0 |
| High-middle SDI  | Female | 15-49 years      | 1.71 | 1.63 | 1.78 | 0 |
| High-middle SDI  | Female | 50-69 years      | 1.38 | 1.34 | 1.42 | 0 |
| High-middle SDI  | Female | 70+ years        | 1.23 | 1.21 | 1.24 | 0 |
| High-middle SDI  | Female | Age-standardized | 1.37 | 1.35 | 1.4  | 0 |
| High-middle SDI  | Both   | All Ages         | 2.18 | 2.17 | 2.2  | 0 |
| High-middle SDI  | Both   | 15-49 years      | 1.59 | 1.51 | 1.67 | 0 |
| High-middle SDI  | Both   | 50-69 years      | 1.09 | 1.04 | 1.14 | 0 |
| High-middle SDI  | Both   | 70+ years        | 1.03 | 1.02 | 1.03 | 0 |
| High-middle SDI  | Both   | Age-standardized | 1.21 | 1.17 | 1.25 | 0 |
| Japan            | Male   | All Ages         | 1.21 | 1.14 | 1.29 | 0 |
| Japan            | Male   | 15-49 years      | 0.74 | 0.71 | 0.77 | 0 |
| Japan            | Male   | 50-69 years      | 0.61 | 0.59 | 0.62 | 0 |
| Japan            | Male   | 70+ years        | 0.25 | 0.22 | 0.29 | 0 |
| Japan            | Male   | Age-standardized | 0.5  | 0.47 | 0.53 | 0 |
| Japan            | Female | All Ages         | 1.8  | 1.69 | 1.91 | 0 |
| Japan            | Female | 15-49 years      | 1.05 | 1.01 | 1.09 | 0 |
| Japan            | Female | 50-69 years      | 0.96 | 0.9  | 1.02 | 0 |
| Japan            | Female | 70+ years        | 0.68 | 0.61 | 0.75 | 0 |
| Japan            | Female | Age-standardized | 0.84 | 0.79 | 0.9  | 0 |

|                 |        |                  |      |      |      |   |
|-----------------|--------|------------------|------|------|------|---|
| Japan           | Both   | All Ages         | 1.39 | 1.3  | 1.47 | 0 |
| Japan           | Both   | 15-49 years      | 0.83 | 0.79 | 0.86 | 0 |
| Japan           | Both   | 50-69 years      | 0.75 | 0.73 | 0.78 | 0 |
| Japan           | Both   | 70+ years        | 0.54 | 0.49 | 0.59 | 0 |
| Singapore       | Both   | Age-standardized | 1.02 | 0.92 | 1.12 | 0 |
| Switzerland     | Male   | All Ages         | 1.38 | 1.29 | 1.47 | 0 |
| Switzerland     | Male   | 15-49 years      | 1.13 | 1.02 | 1.24 | 0 |
| Switzerland     | Male   | 50-69 years      | 1.02 | 0.93 | 1.11 | 0 |
| Switzerland     | Male   | 70+ years        | 0.76 | 0.69 | 0.83 | 0 |
| Switzerland     | Male   | Age-standardized | 1.03 | 0.94 | 1.12 | 0 |
| Switzerland     | Female | All Ages         | 1.41 | 1.33 | 1.49 | 0 |
| Switzerland     | Female | 15-49 years      | 1.21 | 1.12 | 1.3  | 0 |
| Switzerland     | Female | 50-69 years      | 1.12 | 1.04 | 1.21 | 0 |
| Switzerland     | Female | 70+ years        | 0.98 | 0.9  | 1.06 | 0 |
| Switzerland     | Female | Age-standardized | 1.12 | 1.04 | 1.21 | 0 |
| Switzerland     | Both   | All Ages         | 1.4  | 1.32 | 1.48 | 0 |
| Switzerland     | Both   | 15-49 years      | 1.13 | 1.04 | 1.22 | 0 |
| Switzerland     | Both   | 50-69 years      | 1.12 | 1.03 | 1.21 | 0 |
| Switzerland     | Both   | 70+ years        | 1    | 0.94 | 1.06 | 0 |
| Dominica        | Both   | Age-standardized | 1.01 | 0.91 | 1.1  | 0 |
| Qatar           | Male   | All Ages         | 1.75 | 1.68 | 1.81 | 0 |
| Qatar           | Male   | 15-49 years      | 1.05 | 1.01 | 1.1  | 0 |
| Qatar           | Male   | 50-69 years      | 0.94 | 0.92 | 0.97 | 0 |
| Qatar           | Male   | 70+ years        | 0.72 | 0.71 | 0.74 | 0 |
| Qatar           | Male   | Age-standardized | 0.99 | 0.97 | 1.01 | 0 |
| Qatar           | Female | All Ages         | 2.04 | 1.98 | 2.09 | 0 |
| Qatar           | Female | 15-49 years      | 1.15 | 1.1  | 1.19 | 0 |
| Qatar           | Female | 50-69 years      | 0.95 | 0.92 | 0.98 | 0 |
| Qatar           | Female | 70+ years        | 0.85 | 0.82 | 0.89 | 0 |
| Qatar           | Female | Age-standardized | 0.94 | 0.91 | 0.98 | 0 |
| Qatar           | Both   | All Ages         | 2.06 | 1.96 | 2.16 | 0 |
| Qatar           | Both   | 15-49 years      | 1.22 | 1.2  | 1.24 | 0 |
| Qatar           | Both   | 50-69 years      | 1.01 | 0.99 | 1.04 | 0 |
| Qatar           | Both   | 70+ years        | 0.83 | 0.8  | 0.87 | 0 |
| Bermuda         | Both   | Age-standardized | 1.01 | 0.95 | 1.07 | 0 |
| Haiti           | Male   | All Ages         | 1.6  | 1.55 | 1.65 | 0 |
| Haiti           | Male   | 15-49 years      | 1.17 | 1.13 | 1.21 | 0 |
| Haiti           | Male   | 50-69 years      | 1.04 | 0.99 | 1.09 | 0 |
| Haiti           | Male   | 70+ years        | 0.91 | 0.85 | 0.98 | 0 |
| Haiti           | Male   | Age-standardized | 1.07 | 1.03 | 1.11 | 0 |
| Haiti           | Female | All Ages         | 2.04 | 1.98 | 2.1  | 0 |
| Haiti           | Female | 15-49 years      | 1.51 | 1.47 | 1.56 | 0 |
| Haiti           | Female | 50-69 years      | 1.21 | 1.16 | 1.27 | 0 |
| Haiti           | Female | 70+ years        | 1.22 | 1.15 | 1.29 | 0 |
| Haiti           | Female | Age-standardized | 1.3  | 1.25 | 1.36 | 0 |
| Haiti           | Both   | All Ages         | 1.79 | 1.73 | 1.84 | 0 |
| Haiti           | Both   | 15-49 years      | 1.31 | 1.27 | 1.35 | 0 |
| Haiti           | Both   | 50-69 years      | 1.08 | 1.03 | 1.13 | 0 |
| Haiti           | Both   | 70+ years        | 1.03 | 0.95 | 1.1  | 0 |
| Solomon Islands | Both   | Age-standardized | 1    | 0.93 | 1.07 | 0 |
| Peru            | Male   | All Ages         | 2.4  | 2.34 | 2.45 | 0 |
| Peru            | Male   | 15-49 years      | 1.73 | 1.68 | 1.79 | 0 |
| Peru            | Male   | 50-69 years      | 1.28 | 1.23 | 1.33 | 0 |
| Peru            | Male   | 70+ years        | 1.03 | 0.97 | 1.08 | 0 |
| Peru            | Male   | Age-standardized | 1.35 | 1.29 | 1.4  | 0 |
| Peru            | Female | All Ages         | 2.26 | 2.2  | 2.33 | 0 |

|             |        |                  |       |       |       |       |
|-------------|--------|------------------|-------|-------|-------|-------|
| Peru        | Female | 15-49 years      | 1.44  | 1.42  | 1.47  | 0     |
| Peru        | Female | 50-69 years      | 1.04  | 1     | 1.09  | 0     |
| Peru        | Female | 70+ years        | 1.1   | 1.04  | 1.17  | 0     |
| Peru        | Female | Age-standardized | 1.13  | 1.09  | 1.16  | 0     |
| Peru        | Both   | All Ages         | 2.36  | 2.31  | 2.42  | 0     |
| Peru        | Both   | 15-49 years      | 1.66  | 1.62  | 1.7   | 0     |
| Peru        | Both   | 50-69 years      | 1.18  | 1.14  | 1.23  | 0     |
| Peru        | Both   | 70+ years        | 1.08  | 1.04  | 1.12  | 0     |
| Vietnam     | Both   | Age-standardized | 1     | 0.96  | 1.04  | 0     |
| South Sudan | Male   | All Ages         | 0.14  | 0.06  | 0.21  | 0.001 |
| South Sudan | Male   | 15-49 years      | 0.61  | 0.6   | 0.63  | 0     |
| South Sudan | Male   | 50-69 years      | 0.49  | 0.45  | 0.53  | 0     |
| South Sudan | Male   | 70+ years        | 0.53  | 0.49  | 0.56  | 0     |
| South Sudan | Male   | Age-standardized | 0.55  | 0.51  | 0.59  | 0     |
| South Sudan | Female | All Ages         | 0.17  | 0.1   | 0.24  | 0     |
| South Sudan | Female | 15-49 years      | 0.33  | 0.3   | 0.37  | 0     |
| South Sudan | Female | 50-69 years      | 0.1   | 0.07  | 0.14  | 0     |
| South Sudan | Female | 70+ years        | 0.25  | 0.21  | 0.29  | 0     |
| South Sudan | Female | Age-standardized | 0.18  | 0.15  | 0.2   | 0     |
| South Sudan | Both   | All Ages         | 0.11  | 0.04  | 0.19  | 0.003 |
| South Sudan | Both   | 15-49 years      | 0.44  | 0.41  | 0.46  | 0     |
| South Sudan | Both   | 50-69 years      | 0.27  | 0.23  | 0.31  | 0     |
| South Sudan | Both   | 70+ years        | 0.48  | 0.47  | 0.48  | 0     |
| Turkey      | Both   | Age-standardized | 1     | 0.94  | 1.07  | 0     |
| Luxembourg  | Male   | All Ages         | 1.28  | 1.2   | 1.35  | 0     |
| Luxembourg  | Male   | 15-49 years      | 1.16  | 1.03  | 1.3   | 0     |
| Luxembourg  | Male   | 50-69 years      | 1.03  | 0.92  | 1.14  | 0     |
| Luxembourg  | Male   | 70+ years        | 0.8   | 0.7   | 0.9   | 0     |
| Luxembourg  | Male   | Age-standardized | 1.07  | 0.96  | 1.17  | 0     |
| Luxembourg  | Female | All Ages         | 1.41  | 1.31  | 1.51  | 0     |
| Luxembourg  | Female | 15-49 years      | 1.38  | 1.23  | 1.53  | 0     |
| Luxembourg  | Female | 50-69 years      | 1.27  | 1.15  | 1.39  | 0     |
| Luxembourg  | Female | 70+ years        | 1.26  | 1.14  | 1.39  | 0     |
| Luxembourg  | Female | Age-standardized | 1.32  | 1.21  | 1.44  | 0     |
| Luxembourg  | Both   | All Ages         | 1.35  | 1.27  | 1.43  | 0     |
| Luxembourg  | Both   | 15-49 years      | 1.22  | 1.09  | 1.35  | 0     |
| Luxembourg  | Both   | 50-69 years      | 1.19  | 1.07  | 1.31  | 0     |
| Luxembourg  | Both   | 70+ years        | 1.2   | 1.09  | 1.3   | 0     |
| Belize      | Both   | Age-standardized | 1     | 0.9   | 1.11  | 0     |
| Burundi     | Male   | All Ages         | 0.68  | 0.64  | 0.72  | 0     |
| Burundi     | Male   | 15-49 years      | 0.33  | 0.26  | 0.4   | 0     |
| Burundi     | Male   | 50-69 years      | 0.3   | 0.27  | 0.33  | 0     |
| Burundi     | Male   | 70+ years        | 0.37  | 0.35  | 0.4   | 0     |
| Burundi     | Male   | Age-standardized | 0.36  | 0.35  | 0.38  | 0     |
| Burundi     | Female | All Ages         | -0.09 | -0.19 | 0.02  | 0.094 |
| Burundi     | Female | 15-49 years      | -0.15 | -0.26 | -0.04 | 0.011 |
| Burundi     | Female | 50-69 years      | -0.05 | -0.11 | 0.01  | 0.127 |
| Burundi     | Female | 70+ years        | 0.13  | 0.08  | 0.18  | 0     |
| Burundi     | Female | Age-standardized | 0.05  | 0.01  | 0.1   | 0.023 |
| Burundi     | Both   | All Ages         | 0.41  | 0.34  | 0.47  | 0     |
| Burundi     | Both   | 15-49 years      | 0.18  | 0.09  | 0.26  | 0     |
| Burundi     | Both   | 50-69 years      | 0.32  | 0.29  | 0.35  | 0     |
| Burundi     | Both   | 70+ years        | 0.38  | 0.33  | 0.42  | 0     |
| Estonia     | Both   | Age-standardized | 0.99  | 0.88  | 1.11  | 0     |
| New Zealand | Male   | All Ages         | 1.65  | 1.52  | 1.78  | 0     |
| New Zealand | Male   | 15-49 years      | 1.33  | 1.16  | 1.5   | 0     |

|              |        |                  |       |       |       |       |
|--------------|--------|------------------|-------|-------|-------|-------|
| New Zealand  | Male   | 50-69 years      | 1.17  | 1.05  | 1.29  | 0     |
| New Zealand  | Male   | 70+ years        | 0.84  | 0.72  | 0.95  | 0     |
| New Zealand  | Male   | Age-standardized | 1.21  | 1.08  | 1.34  | 0     |
| New Zealand  | Female | All Ages         | 1.64  | 1.56  | 1.72  | 0     |
| New Zealand  | Female | 15-49 years      | 1.3   | 1.17  | 1.43  | 0     |
| New Zealand  | Female | 50-69 years      | 1.15  | 1.06  | 1.23  | 0     |
| New Zealand  | Female | 70+ years        | 0.99  | 0.89  | 1.08  | 0     |
| New Zealand  | Female | Age-standardized | 1.17  | 1.07  | 1.27  | 0     |
| New Zealand  | Both   | All Ages         | 1.63  | 1.52  | 1.74  | 0     |
| New Zealand  | Both   | 15-49 years      | 1.28  | 1.13  | 1.43  | 0     |
| New Zealand  | Both   | 50-69 years      | 1.12  | 1.01  | 1.23  | 0     |
| New Zealand  | Both   | 70+ years        | 1.05  | 0.94  | 1.16  | 0     |
| Namibia      | Both   | Age-standardized | 0.99  | 0.95  | 1.03  | 0     |
| Slovakia     | Male   | All Ages         | 1.01  | 0.94  | 1.08  | 0     |
| Slovakia     | Male   | 15-49 years      | 0.52  | 0.4   | 0.64  | 0     |
| Slovakia     | Male   | 50-69 years      | -0.22 | -0.37 | -0.07 | 0.005 |
| Slovakia     | Male   | 70+ years        | 0.04  | -0.03 | 0.12  | 0.248 |
| Slovakia     | Male   | Age-standardized | 0.13  | 0.05  | 0.2   | 0.002 |
| Slovakia     | Female | All Ages         | 1.44  | 1.37  | 1.52  | 0     |
| Slovakia     | Female | 15-49 years      | 0.68  | 0.58  | 0.79  | 0     |
| Slovakia     | Female | 50-69 years      | 0.46  | 0.3   | 0.62  | 0     |
| Slovakia     | Female | 70+ years        | 0.59  | 0.52  | 0.66  | 0     |
| Slovakia     | Female | Age-standardized | 0.53  | 0.45  | 0.6   | 0     |
| Slovakia     | Both   | All Ages         | 1.16  | 1.08  | 1.24  | 0     |
| Slovakia     | Both   | 15-49 years      | 0.59  | 0.47  | 0.71  | 0     |
| Slovakia     | Both   | 50-69 years      | 0.1   | -0.05 | 0.25  | 0.17  |
| Slovakia     | Both   | 70+ years        | 0.23  | 0.15  | 0.31  | 0     |
| Burkina Faso | Both   | Age-standardized | 0.99  | 0.97  | 1.01  | 0     |
| Kenya        | Male   | All Ages         | 1.71  | 1.66  | 1.76  | 0     |
| Kenya        | Male   | 15-49 years      | 1.27  | 1.24  | 1.31  | 0     |
| Kenya        | Male   | 50-69 years      | 0.97  | 0.91  | 1.02  | 0     |
| Kenya        | Male   | 70+ years        | 1.03  | 0.97  | 1.09  | 0     |
| Kenya        | Male   | Age-standardized | 1.05  | 1.02  | 1.08  | 0     |
| Kenya        | Female | All Ages         | 0.94  | 0.88  | 1.01  | 0     |
| Kenya        | Female | 15-49 years      | 0.48  | 0.43  | 0.54  | 0     |
| Kenya        | Female | 50-69 years      | 0.1   | 0.05  | 0.16  | 0.001 |
| Kenya        | Female | 70+ years        | 0.24  | 0.18  | 0.3   | 0     |
| Kenya        | Female | Age-standardized | 0.22  | 0.18  | 0.27  | 0     |
| Kenya        | Both   | All Ages         | 1.44  | 1.38  | 1.5   | 0     |
| Kenya        | Both   | 15-49 years      | 1     | 0.96  | 1.04  | 0     |
| Kenya        | Both   | 50-69 years      | 0.67  | 0.62  | 0.73  | 0     |
| Kenya        | Both   | 70+ years        | 0.49  | 0.42  | 0.57  | 0     |
| Argentina    | Both   | Age-standardized | 0.97  | 0.96  | 0.99  | 0     |
| Fiji         | Male   | All Ages         | 1.58  | 1.52  | 1.64  | 0     |
| Fiji         | Male   | 15-49 years      | 0.89  | 0.78  | 1     | 0     |
| Fiji         | Male   | 50-69 years      | 0.59  | 0.49  | 0.69  | 0     |
| Fiji         | Male   | 70+ years        | 0.49  | 0.39  | 0.59  | 0     |
| Fiji         | Male   | Age-standardized | 0.62  | 0.51  | 0.73  | 0     |
| Fiji         | Female | All Ages         | 1.95  | 1.93  | 1.98  | 0     |
| Fiji         | Female | 15-49 years      | 1.2   | 1.16  | 1.23  | 0     |
| Fiji         | Female | 50-69 years      | 1.03  | 0.99  | 1.07  | 0     |
| Fiji         | Female | 70+ years        | 0.88  | 0.85  | 0.9   | 0     |
| Fiji         | Female | Age-standardized | 0.98  | 0.94  | 1.01  | 0     |
| Fiji         | Both   | All Ages         | 1.75  | 1.72  | 1.78  | 0     |
| Fiji         | Both   | 15-49 years      | 1.03  | 0.96  | 1.1   | 0     |
| Fiji         | Both   | 50-69 years      | 0.8   | 0.73  | 0.87  | 0     |

|                        |        |                  |      |      |      |   |
|------------------------|--------|------------------|------|------|------|---|
| Fiji                   | Both   | 70+ years        | 0.65 | 0.59 | 0.71 | 0 |
| Kuwait                 | Both   | Age-standardized | 0.96 | 0.92 | 0.99 | 0 |
| Bosnia and Herzegovina | Male   | All Ages         | 2.12 | 1.94 | 2.29 | 0 |
| Bosnia and Herzegovina | Male   | 15-49 years      | 1.34 | 1.23 | 1.45 | 0 |
| Bosnia and Herzegovina | Male   | 50-69 years      | 0.79 | 0.57 | 1.01 | 0 |
| Bosnia and Herzegovina | Male   | 70+ years        | 1.17 | 0.93 | 1.41 | 0 |
| Bosnia and Herzegovina | Male   | Age-standardized | 1.04 | 0.91 | 1.17 | 0 |
| Bosnia and Herzegovina | Female | All Ages         | 2.47 | 2.33 | 2.62 | 0 |
| Bosnia and Herzegovina | Female | 15-49 years      | 1.57 | 1.45 | 1.7  | 0 |
| Bosnia and Herzegovina | Female | 50-69 years      | 1.4  | 1.24 | 1.56 | 0 |
| Bosnia and Herzegovina | Female | 70+ years        | 1.66 | 1.48 | 1.83 | 0 |
| Bosnia and Herzegovina | Female | Age-standardized | 1.45 | 1.32 | 1.58 | 0 |
| Bosnia and Herzegovina | Both   | All Ages         | 2.27 | 2.11 | 2.43 | 0 |
| Bosnia and Herzegovina | Both   | 15-49 years      | 1.43 | 1.32 | 1.54 | 0 |
| Bosnia and Herzegovina | Both   | 50-69 years      | 1.08 | 0.89 | 1.27 | 0 |
| Bosnia and Herzegovina | Both   | 70+ years        | 1.5  | 1.28 | 1.72 | 0 |
| Laos                   | Both   | Age-standardized | 0.95 | 0.89 | 1.01 | 0 |
| Sweden                 | Male   | All Ages         | 1.24 | 1.14 | 1.35 | 0 |
| Sweden                 | Male   | 15-49 years      | 1.1  | 0.98 | 1.21 | 0 |
| Sweden                 | Male   | 50-69 years      | 1.08 | 0.99 | 1.17 | 0 |
| Sweden                 | Male   | 70+ years        | 0.77 | 0.7  | 0.84 | 0 |
| Sweden                 | Male   | Age-standardized | 1.08 | 0.98 | 1.19 | 0 |
| Sweden                 | Female | All Ages         | 1.4  | 1.29 | 1.52 | 0 |
| Sweden                 | Female | 15-49 years      | 1.32 | 1.21 | 1.44 | 0 |
| Sweden                 | Female | 50-69 years      | 1.32 | 1.23 | 1.42 | 0 |
| Sweden                 | Female | 70+ years        | 1.14 | 1.04 | 1.23 | 0 |
| Sweden                 | Female | Age-standardized | 1.32 | 1.21 | 1.43 | 0 |
| Sweden                 | Both   | All Ages         | 1.32 | 1.21 | 1.42 | 0 |
| Sweden                 | Both   | 15-49 years      | 1.17 | 1.05 | 1.28 | 0 |
| Sweden                 | Both   | 50-69 years      | 1.19 | 1.1  | 1.29 | 0 |
| Sweden                 | Both   | 70+ years        | 1.02 | 0.96 | 1.09 | 0 |
| Pakistan               | Both   | Age-standardized | 0.94 | 0.91 | 0.97 | 0 |
| Antigua and Barbuda    | Male   | All Ages         | 1.89 | 1.81 | 1.97 | 0 |
| Antigua and Barbuda    | Male   | 15-49 years      | 1.39 | 1.33 | 1.46 | 0 |
| Antigua and Barbuda    | Male   | 50-69 years      | 0.93 | 0.89 | 0.97 | 0 |
| Antigua and Barbuda    | Male   | 70+ years        | 0.68 | 0.65 | 0.71 | 0 |
| Antigua and Barbuda    | Male   | Age-standardized | 1.02 | 0.98 | 1.06 | 0 |
| Antigua and Barbuda    | Female | All Ages         | 1.89 | 1.76 | 2.01 | 0 |
| Antigua and Barbuda    | Female | 15-49 years      | 1.44 | 1.38 | 1.5  | 0 |
| Antigua and Barbuda    | Female | 50-69 years      | 0.94 | 0.86 | 1.03 | 0 |
| Antigua and Barbuda    | Female | 70+ years        | 0.91 | 0.84 | 0.97 | 0 |
| Antigua and Barbuda    | Female | Age-standardized | 1.05 | 0.98 | 1.12 | 0 |
| Antigua and Barbuda    | Both   | All Ages         | 1.9  | 1.79 | 2.01 | 0 |
| Antigua and Barbuda    | Both   | 15-49 years      | 1.42 | 1.37 | 1.47 | 0 |
| Antigua and Barbuda    | Both   | 50-69 years      | 0.96 | 0.9  | 1.02 | 0 |
| Antigua and Barbuda    | Both   | 70+ years        | 0.83 | 0.78 | 0.87 | 0 |
| Armenia                | Both   | Age-standardized | 0.93 | 0.86 | 1.01 | 0 |
| Low SDI                | Male   | All Ages         | 1.18 | 1.09 | 1.27 | 0 |
| Low SDI                | Male   | 15-49 years      | 0.9  | 0.87 | 0.94 | 0 |
| Low SDI                | Male   | 50-69 years      | 0.73 | 0.68 | 0.77 | 0 |
| Low SDI                | Male   | 70+ years        | 0.74 | 0.69 | 0.79 | 0 |
| Low SDI                | Male   | Age-standardized | 0.82 | 0.78 | 0.86 | 0 |
| Low SDI                | Female | All Ages         | 1.13 | 1.03 | 1.23 | 0 |
| Low SDI                | Female | 15-49 years      | 0.78 | 0.72 | 0.84 | 0 |
| Low SDI                | Female | 50-69 years      | 0.61 | 0.56 | 0.67 | 0 |
| Low SDI                | Female | 70+ years        | 0.72 | 0.67 | 0.78 | 0 |

|           |        |                  |      |      |      |       |
|-----------|--------|------------------|------|------|------|-------|
| Low SDI   | Female | Age-standardized | 0.69 | 0.64 | 0.75 | 0     |
| Low SDI   | Both   | All Ages         | 1.15 | 1.06 | 1.24 | 0     |
| Low SDI   | Both   | 15-49 years      | 0.85 | 0.8  | 0.89 | 0     |
| Low SDI   | Both   | 50-69 years      | 0.64 | 0.59 | 0.69 | 0     |
| Low SDI   | Both   | 70+ years        | 0.66 | 0.62 | 0.7  | 0     |
| Low SDI   | Both   | Age-standardized | 0.74 | 0.7  | 0.79 | 0     |
| Zambia    | Male   | All Ages         | 0.84 | 0.74 | 0.95 | 0     |
| Zambia    | Male   | 15-49 years      | 0.85 | 0.82 | 0.88 | 0     |
| Zambia    | Male   | 50-69 years      | 0.56 | 0.53 | 0.59 | 0     |
| Zambia    | Male   | 70+ years        | 0.59 | 0.55 | 0.63 | 0     |
| Zambia    | Male   | Age-standardized | 0.63 | 0.6  | 0.65 | 0     |
| Zambia    | Female | All Ages         | 0.37 | 0.26 | 0.49 | 0     |
| Zambia    | Female | 15-49 years      | 0.26 | 0.21 | 0.32 | 0     |
| Zambia    | Female | 50-69 years      | 0.05 | 0.01 | 0.1  | 0.027 |
| Zambia    | Female | 70+ years        | 0.18 | 0.14 | 0.22 | 0     |
| Zambia    | Female | Age-standardized | 0.12 | 0.07 | 0.16 | 0     |
| Zambia    | Both   | All Ages         | 0.66 | 0.55 | 0.77 | 0     |
| Zambia    | Both   | 15-49 years      | 0.63 | 0.59 | 0.67 | 0     |
| Zambia    | Both   | 50-69 years      | 0.32 | 0.28 | 0.37 | 0     |
| Zambia    | Both   | 70+ years        | 0.2  | 0.18 | 0.23 | 0     |
| Vanuatu   | Both   | Age-standardized | 0.93 | 0.91 | 0.95 | 0     |
| Denmark   | Male   | All Ages         | 1.25 | 1.13 | 1.38 | 0     |
| Denmark   | Male   | 15-49 years      | 1.13 | 0.92 | 1.34 | 0     |
| Denmark   | Male   | 50-69 years      | 1.08 | 0.94 | 1.21 | 0     |
| Denmark   | Male   | 70+ years        | 0.82 | 0.71 | 0.93 | 0     |
| Denmark   | Male   | Age-standardized | 1.08 | 0.93 | 1.23 | 0     |
| Denmark   | Female | All Ages         | 1.33 | 1.19 | 1.46 | 0     |
| Denmark   | Female | 15-49 years      | 1.26 | 1.04 | 1.47 | 0     |
| Denmark   | Female | 50-69 years      | 1.25 | 1.1  | 1.4  | 0     |
| Denmark   | Female | 70+ years        | 1.03 | 0.89 | 1.16 | 0     |
| Denmark   | Female | Age-standardized | 1.22 | 1.06 | 1.38 | 0     |
| Denmark   | Both   | All Ages         | 1.29 | 1.16 | 1.42 | 0     |
| Denmark   | Both   | 15-49 years      | 1.14 | 0.93 | 1.35 | 0     |
| Denmark   | Both   | 50-69 years      | 1.17 | 1.02 | 1.32 | 0     |
| Denmark   | Both   | 70+ years        | 1.07 | 0.98 | 1.17 | 0     |
| Palestine | Both   | Age-standardized | 0.92 | 0.82 | 1.03 | 0     |
| Jamaica   | Male   | All Ages         | 2.17 | 2.06 | 2.28 | 0     |
| Jamaica   | Male   | 15-49 years      | 1.48 | 1.33 | 1.63 | 0     |
| Jamaica   | Male   | 50-69 years      | 1.07 | 0.97 | 1.17 | 0     |
| Jamaica   | Male   | 70+ years        | 0.83 | 0.74 | 0.93 | 0     |
| Jamaica   | Male   | Age-standardized | 1.15 | 1.04 | 1.27 | 0     |
| Jamaica   | Female | All Ages         | 2.12 | 2.01 | 2.23 | 0     |
| Jamaica   | Female | 15-49 years      | 1.49 | 1.33 | 1.64 | 0     |
| Jamaica   | Female | 50-69 years      | 1.07 | 0.95 | 1.18 | 0     |
| Jamaica   | Female | 70+ years        | 0.97 | 0.85 | 1.09 | 0     |
| Jamaica   | Female | Age-standardized | 1.15 | 1.03 | 1.28 | 0     |
| Jamaica   | Both   | All Ages         | 2.16 | 2.04 | 2.27 | 0     |
| Jamaica   | Both   | 15-49 years      | 1.5  | 1.35 | 1.65 | 0     |
| Jamaica   | Both   | 50-69 years      | 1.09 | 0.98 | 1.2  | 0     |
| Jamaica   | Both   | 70+ years        | 0.92 | 0.8  | 1.03 | 0     |
| Samoa     | Both   | Age-standardized | 0.91 | 0.87 | 0.96 | 0     |
| Syria     | Male   | All Ages         | 2.25 | 2.15 | 2.35 | 0     |
| Syria     | Male   | 15-49 years      | 1.68 | 1.6  | 1.76 | 0     |
| Syria     | Male   | 50-69 years      | 1.08 | 1.07 | 1.1  | 0     |
| Syria     | Male   | 70+ years        | 0.99 | 0.94 | 1.03 | 0     |
| Syria     | Male   | Age-standardized | 1.14 | 1.12 | 1.16 | 0     |



|                  |        |                  |      |      |      |   |
|------------------|--------|------------------|------|------|------|---|
| Syria            | Female | All Ages         | 2.31 | 2.22 | 2.39 | 0 |
| Syria            | Female | 15-49 years      | 1.7  | 1.61 | 1.78 | 0 |
| Syria            | Female | 50-69 years      | 1.18 | 1.15 | 1.21 | 0 |
| Syria            | Female | 70+ years        | 1.09 | 1.05 | 1.13 | 0 |
| Syria            | Female | Age-standardized | 1.2  | 1.17 | 1.23 | 0 |
| Syria            | Both   | All Ages         | 2.27 | 2.18 | 2.37 | 0 |
| Syria            | Both   | 15-49 years      | 1.69 | 1.61 | 1.76 | 0 |
| Syria            | Both   | 50-69 years      | 1.13 | 1.12 | 1.15 | 0 |
| Syria            | Both   | 70+ years        | 0.98 | 0.93 | 1.03 | 0 |
| Tonga            | Both   | Age-standardized | 0.91 | 0.87 | 0.94 | 0 |
| Iraq             | Male   | All Ages         | 1.44 | 1.36 | 1.52 | 0 |
| Iraq             | Male   | 15-49 years      | 0.95 | 0.9  | 1.01 | 0 |
| Iraq             | Male   | 50-69 years      | 0.66 | 0.62 | 0.7  | 0 |
| Iraq             | Male   | 70+ years        | 0.54 | 0.51 | 0.57 | 0 |
| Iraq             | Male   | Age-standardized | 0.68 | 0.64 | 0.72 | 0 |
| Iraq             | Female | All Ages         | 1.15 | 1.02 | 1.28 | 0 |
| Iraq             | Female | 15-49 years      | 0.67 | 0.59 | 0.76 | 0 |
| Iraq             | Female | 50-69 years      | 0.44 | 0.37 | 0.52 | 0 |
| Iraq             | Female | 70+ years        | 0.34 | 0.28 | 0.4  | 0 |
| Iraq             | Female | Age-standardized | 0.43 | 0.35 | 0.51 | 0 |
| Iraq             | Both   | All Ages         | 1.33 | 1.24 | 1.43 | 0 |
| Iraq             | Both   | 15-49 years      | 0.85 | 0.78 | 0.91 | 0 |
| Iraq             | Both   | 50-69 years      | 0.59 | 0.54 | 0.63 | 0 |
| Iraq             | Both   | 70+ years        | 0.5  | 0.46 | 0.54 | 0 |
| Afghanistan      | Both   | Age-standardized | 0.9  | 0.81 | 0.99 | 0 |
| American Samoa   | Male   | All Ages         | 1.45 | 1.42 | 1.48 | 0 |
| American Samoa   | Male   | 15-49 years      | 0.93 | 0.86 | 0.99 | 0 |
| American Samoa   | Male   | 50-69 years      | 0.67 | 0.65 | 0.68 | 0 |
| American Samoa   | Male   | 70+ years        | 0.55 | 0.53 | 0.56 | 0 |
| American Samoa   | Male   | Age-standardized | 0.74 | 0.72 | 0.75 | 0 |
| American Samoa   | Female | All Ages         | 1.78 | 1.76 | 1.8  | 0 |
| American Samoa   | Female | 15-49 years      | 1.11 | 1    | 1.23 | 0 |
| American Samoa   | Female | 50-69 years      | 0.93 | 0.91 | 0.95 | 0 |
| American Samoa   | Female | 70+ years        | 0.75 | 0.72 | 0.78 | 0 |
| American Samoa   | Female | Age-standardized | 0.96 | 0.93 | 0.99 | 0 |
| American Samoa   | Both   | All Ages         | 1.61 | 1.59 | 1.63 | 0 |
| American Samoa   | Both   | 15-49 years      | 1.01 | 0.93 | 1.1  | 0 |
| American Samoa   | Both   | 50-69 years      | 0.8  | 0.78 | 0.81 | 0 |
| American Samoa   | Both   | 70+ years        | 0.66 | 0.64 | 0.67 | 0 |
| Poland           | Both   | Age-standardized | 0.89 | 0.86 | 0.93 | 0 |
| Argentina        | Male   | All Ages         | 1.35 | 1.33 | 1.38 | 0 |
| Argentina        | Male   | 15-49 years      | 1.06 | 1.04 | 1.08 | 0 |
| Argentina        | Male   | 50-69 years      | 0.89 | 0.87 | 0.92 | 0 |
| Argentina        | Male   | 70+ years        | 0.59 | 0.57 | 0.61 | 0 |
| Argentina        | Male   | Age-standardized | 0.91 | 0.89 | 0.94 | 0 |
| Argentina        | Female | All Ages         | 1.52 | 1.5  | 1.55 | 0 |
| Argentina        | Female | 15-49 years      | 1.15 | 1.11 | 1.19 | 0 |
| Argentina        | Female | 50-69 years      | 1.08 | 1.06 | 1.1  | 0 |
| Argentina        | Female | 70+ years        | 0.98 | 0.95 | 1    | 0 |
| Argentina        | Female | Age-standardized | 1.07 | 1.05 | 1.08 | 0 |
| Argentina        | Both   | All Ages         | 1.41 | 1.38 | 1.43 | 0 |
| Argentina        | Both   | 15-49 years      | 1.09 | 1.06 | 1.11 | 0 |
| Argentina        | Both   | 50-69 years      | 0.97 | 0.95 | 0.99 | 0 |
| Argentina        | Both   | 70+ years        | 0.74 | 0.73 | 0.76 | 0 |
| Marshall Islands | Both   | Age-standardized | 0.89 | 0.86 | 0.92 | 0 |
| United States    | Male   | All Ages         | 1.79 | 1.68 | 1.9  | 0 |

|               |        |                  |      |      |      |   |
|---------------|--------|------------------|------|------|------|---|
| United States | Male   | 15-49 years      | 1.47 | 1.31 | 1.62 | 0 |
| United States | Male   | 50-69 years      | 1.34 | 1.23 | 1.44 | 0 |
| United States | Male   | 70+ years        | 1.01 | 0.91 | 1.1  | 0 |
| United States | Male   | Age-standardized | 1.4  | 1.27 | 1.53 | 0 |
| United States | Female | All Ages         | 1.24 | 1.17 | 1.31 | 0 |
| United States | Female | 15-49 years      | 0.99 | 0.85 | 1.14 | 0 |
| United States | Female | 50-69 years      | 0.78 | 0.74 | 0.83 | 0 |
| United States | Female | 70+ years        | 0.74 | 0.62 | 0.86 | 0 |
| United States | Female | Age-standardized | 0.93 | 0.82 | 1.05 | 0 |
| United States | Both   | All Ages         | 1.56 | 1.46 | 1.65 | 0 |
| United States | Both   | 15-49 years      | 1.29 | 1.14 | 1.44 | 0 |
| United States | Both   | 50-69 years      | 1.11 | 1.03 | 1.19 | 0 |
| United States | Both   | 70+ years        | 0.88 | 0.78 | 0.99 | 0 |
| Tunisia       | Both   | Age-standardized | 0.89 | 0.87 | 0.91 | 0 |
| Pakistan      | Male   | All Ages         | 1.33 | 1.24 | 1.42 | 0 |
| Pakistan      | Male   | 15-49 years      | 1.06 | 1.02 | 1.09 | 0 |
| Pakistan      | Male   | 50-69 years      | 0.88 | 0.86 | 0.91 | 0 |
| Pakistan      | Male   | 70+ years        | 0.98 | 0.94 | 1.02 | 0 |
| Pakistan      | Male   | Age-standardized | 0.94 | 0.91 | 0.97 | 0 |
| Pakistan      | Female | All Ages         | 1.56 | 1.45 | 1.68 | 0 |
| Pakistan      | Female | 15-49 years      | 1.13 | 1.08 | 1.18 | 0 |
| Pakistan      | Female | 50-69 years      | 0.99 | 0.94 | 1.04 | 0 |
| Pakistan      | Female | 70+ years        | 1.17 | 1.13 | 1.22 | 0 |
| Pakistan      | Female | Age-standardized | 1.03 | 0.99 | 1.07 | 0 |
| Pakistan      | Both   | All Ages         | 1.4  | 1.3  | 1.5  | 0 |
| Pakistan      | Both   | 15-49 years      | 1.06 | 1.02 | 1.09 | 0 |
| Pakistan      | Both   | 50-69 years      | 0.9  | 0.87 | 0.94 | 0 |
| Pakistan      | Both   | 70+ years        | 0.98 | 0.93 | 1.02 | 0 |
| China         | Both   | Age-standardized | 0.88 | 0.81 | 0.94 | 0 |
| South Africa  | Male   | All Ages         | 1.49 | 1.42 | 1.56 | 0 |
| South Africa  | Male   | 15-49 years      | 0.96 | 0.89 | 1.04 | 0 |
| South Africa  | Male   | 50-69 years      | 0.66 | 0.63 | 0.69 | 0 |
| South Africa  | Male   | 70+ years        | 0.59 | 0.56 | 0.62 | 0 |
| South Africa  | Male   | Age-standardized | 0.72 | 0.69 | 0.75 | 0 |
| South Africa  | Female | All Ages         | 1.38 | 1.33 | 1.43 | 0 |
| South Africa  | Female | 15-49 years      | 0.81 | 0.75 | 0.87 | 0 |
| South Africa  | Female | 50-69 years      | 0.55 | 0.5  | 0.6  | 0 |
| South Africa  | Female | 70+ years        | 0.7  | 0.67 | 0.73 | 0 |
| South Africa  | Female | Age-standardized | 0.58 | 0.54 | 0.62 | 0 |
| South Africa  | Both   | All Ages         | 1.48 | 1.41 | 1.56 | 0 |
| South Africa  | Both   | 15-49 years      | 0.98 | 0.9  | 1.06 | 0 |
| South Africa  | Both   | 50-69 years      | 0.64 | 0.61 | 0.68 | 0 |
| South Africa  | Both   | 70+ years        | 0.5  | 0.43 | 0.56 | 0 |
| Costa Rica    | Both   | Age-standardized | 0.88 | 0.83 | 0.92 | 0 |
| Philippines   | Male   | All Ages         | 1.56 | 1.51 | 1.62 | 0 |
| Philippines   | Male   | 15-49 years      | 0.97 | 0.87 | 1.06 | 0 |
| Philippines   | Male   | 50-69 years      | 0.77 | 0.7  | 0.85 | 0 |
| Philippines   | Male   | 70+ years        | 0.7  | 0.62 | 0.79 | 0 |
| Philippines   | Male   | Age-standardized | 0.76 | 0.69 | 0.84 | 0 |
| Philippines   | Female | All Ages         | 1.56 | 1.49 | 1.63 | 0 |
| Philippines   | Female | 15-49 years      | 0.87 | 0.76 | 0.98 | 0 |
| Philippines   | Female | 50-69 years      | 0.73 | 0.63 | 0.83 | 0 |
| Philippines   | Female | 70+ years        | 0.63 | 0.54 | 0.72 | 0 |
| Philippines   | Female | Age-standardized | 0.67 | 0.57 | 0.76 | 0 |
| Philippines   | Both   | All Ages         | 1.57 | 1.51 | 1.62 | 0 |
| Philippines   | Both   | 15-49 years      | 0.94 | 0.84 | 1.04 | 0 |

|             |        |                  |      |       |      |       |
|-------------|--------|------------------|------|-------|------|-------|
| Philippines | Both   | 50-69 years      | 0.75 | 0.67  | 0.83 | 0     |
| Philippines | Both   | 70+ years        | 0.6  | 0.51  | 0.69 | 0     |
| Liberia     | Both   | Age-standardized | 0.87 | 0.72  | 1.02 | 0     |
| Cameroon    | Male   | All Ages         | 0.86 | 0.8   | 0.91 | 0     |
| Cameroon    | Male   | 15-49 years      | 0.73 | 0.7   | 0.76 | 0     |
| Cameroon    | Male   | 50-69 years      | 0.65 | 0.63  | 0.66 | 0     |
| Cameroon    | Male   | 70+ years        | 0.67 | 0.65  | 0.69 | 0     |
| Cameroon    | Male   | Age-standardized | 0.68 | 0.67  | 0.7  | 0     |
| Cameroon    | Female | All Ages         | 0.64 | 0.57  | 0.71 | 0     |
| Cameroon    | Female | 15-49 years      | 0.58 | 0.54  | 0.62 | 0     |
| Cameroon    | Female | 50-69 years      | 0.51 | 0.47  | 0.55 | 0     |
| Cameroon    | Female | 70+ years        | 0.69 | 0.65  | 0.73 | 0     |
| Cameroon    | Female | Age-standardized | 0.57 | 0.53  | 0.61 | 0     |
| Cameroon    | Both   | All Ages         | 0.78 | 0.73  | 0.84 | 0     |
| Cameroon    | Both   | 15-49 years      | 0.71 | 0.68  | 0.74 | 0     |
| Cameroon    | Both   | 50-69 years      | 0.62 | 0.6   | 0.63 | 0     |
| Cameroon    | Both   | 70+ years        | 0.63 | 0.61  | 0.66 | 0     |
| Georgia     | Both   | Age-standardized | 0.87 | 0.82  | 0.92 | 0     |
| Kyrgyzstan  | Male   | All Ages         | 0.98 | 0.89  | 1.07 | 0     |
| Kyrgyzstan  | Male   | 15-49 years      | 0.69 | 0.58  | 0.8  | 0     |
| Kyrgyzstan  | Male   | 50-69 years      | 0.01 | -0.11 | 0.14 | 0.847 |
| Kyrgyzstan  | Male   | 70+ years        | 0.58 | 0.56  | 0.59 | 0     |
| Kyrgyzstan  | Male   | Age-standardized | 0.47 | 0.38  | 0.56 | 0     |
| Kyrgyzstan  | Female | All Ages         | 0.92 | 0.8   | 1.04 | 0     |
| Kyrgyzstan  | Female | 15-49 years      | 0.7  | 0.61  | 0.79 | 0     |
| Kyrgyzstan  | Female | 50-69 years      | 0.21 | 0.1   | 0.32 | 0.001 |
| Kyrgyzstan  | Female | 70+ years        | 0.86 | 0.78  | 0.95 | 0     |
| Kyrgyzstan  | Female | Age-standardized | 0.63 | 0.53  | 0.73 | 0     |
| Kyrgyzstan  | Both   | All Ages         | 0.96 | 0.86  | 1.06 | 0     |
| Kyrgyzstan  | Both   | 15-49 years      | 0.69 | 0.59  | 0.8  | 0     |
| Kyrgyzstan  | Both   | 50-69 years      | 0.11 | -0.01 | 0.23 | 0.072 |
| Kyrgyzstan  | Both   | 70+ years        | 0.88 | 0.84  | 0.92 | 0     |
| Macedonia   | Both   | Age-standardized | 0.86 | 0.81  | 0.91 | 0     |
| Chad        | Male   | All Ages         | 0.3  | 0.29  | 0.32 | 0     |
| Chad        | Male   | 15-49 years      | 0.57 | 0.53  | 0.6  | 0     |
| Chad        | Male   | 50-69 years      | 0.55 | 0.54  | 0.57 | 0     |
| Chad        | Male   | 70+ years        | 0.63 | 0.62  | 0.65 | 0     |
| Chad        | Male   | Age-standardized | 0.59 | 0.58  | 0.61 | 0     |
| Chad        | Female | All Ages         | 0.1  | 0.06  | 0.14 | 0     |
| Chad        | Female | 15-49 years      | 0.57 | 0.54  | 0.59 | 0     |
| Chad        | Female | 50-69 years      | 0.55 | 0.53  | 0.58 | 0     |
| Chad        | Female | 70+ years        | 0.7  | 0.69  | 0.71 | 0     |
| Chad        | Female | Age-standardized | 0.64 | 0.61  | 0.66 | 0     |
| Chad        | Both   | All Ages         | 0.24 | 0.22  | 0.26 | 0     |
| Chad        | Both   | 15-49 years      | 0.58 | 0.56  | 0.61 | 0     |
| Chad        | Both   | 50-69 years      | 0.7  | 0.69  | 0.72 | 0     |
| Chad        | Both   | 70+ years        | 0.75 | 0.74  | 0.76 | 0     |
| Lithuania   | Both   | Age-standardized | 0.85 | 0.79  | 0.9  | 0     |
| Uganda      | Male   | All Ages         | 0.67 | 0.51  | 0.82 | 0     |
| Uganda      | Male   | 15-49 years      | 0.8  | 0.73  | 0.86 | 0     |
| Uganda      | Male   | 50-69 years      | 0.69 | 0.66  | 0.72 | 0     |
| Uganda      | Male   | 70+ years        | 0.79 | 0.73  | 0.84 | 0     |
| Uganda      | Male   | Age-standardized | 0.78 | 0.74  | 0.83 | 0     |
| Uganda      | Female | All Ages         | 0.4  | 0.26  | 0.55 | 0     |
| Uganda      | Female | 15-49 years      | 0.29 | 0.24  | 0.35 | 0     |
| Uganda      | Female | 50-69 years      | 0.1  | 0.09  | 0.12 | 0     |

|                |        |                  |      |       |      |       |
|----------------|--------|------------------|------|-------|------|-------|
| Uganda         | Female | 70+ years        | 0.28 | 0.24  | 0.32 | 0     |
| Uganda         | Female | Age-standardized | 0.23 | 0.2   | 0.25 | 0     |
| Uganda         | Both   | All Ages         | 0.57 | 0.42  | 0.73 | 0     |
| Uganda         | Both   | 15-49 years      | 0.61 | 0.55  | 0.68 | 0     |
| Uganda         | Both   | 50-69 years      | 0.37 | 0.35  | 0.4  | 0     |
| Uganda         | Both   | 70+ years        | 0.29 | 0.25  | 0.33 | 0     |
| Romania        | Both   | Age-standardized | 0.85 | 0.83  | 0.87 | 0     |
| Comoros        | Male   | All Ages         | 1.53 | 1.5   | 1.56 | 0     |
| Comoros        | Male   | 15-49 years      | 0.96 | 0.94  | 0.98 | 0     |
| Comoros        | Male   | 50-69 years      | 0.54 | 0.52  | 0.56 | 0     |
| Comoros        | Male   | 70+ years        | 0.57 | 0.54  | 0.6  | 0     |
| Comoros        | Male   | Age-standardized | 0.58 | 0.56  | 0.6  | 0     |
| Comoros        | Female | All Ages         | 1.03 | 0.99  | 1.08 | 0     |
| Comoros        | Female | 15-49 years      | 0.38 | 0.37  | 0.4  | 0     |
| Comoros        | Female | 50-69 years      | 0.04 | 0.01  | 0.07 | 0.008 |
| Comoros        | Female | 70+ years        | 0.19 | 0.16  | 0.21 | 0     |
| Comoros        | Female | Age-standardized | 0.1  | 0.07  | 0.13 | 0     |
| Comoros        | Both   | All Ages         | 1.35 | 1.32  | 1.38 | 0     |
| Comoros        | Both   | 15-49 years      | 0.79 | 0.78  | 0.8  | 0     |
| Comoros        | Both   | 50-69 years      | 0.28 | 0.24  | 0.32 | 0     |
| Comoros        | Both   | 70+ years        | 0.28 | 0.26  | 0.3  | 0     |
| American Samoa | Both   | Age-standardized | 0.84 | 0.82  | 0.86 | 0     |
| Nigeria        | Male   | All Ages         | 0.07 | -0.02 | 0.15 | 0.127 |
| Nigeria        | Male   | 15-49 years      | 0.52 | 0.44  | 0.6  | 0     |
| Nigeria        | Male   | 50-69 years      | 0.56 | 0.49  | 0.63 | 0     |
| Nigeria        | Male   | 70+ years        | 0.54 | 0.46  | 0.63 | 0     |
| Nigeria        | Male   | Age-standardized | 0.6  | 0.52  | 0.68 | 0     |
| Nigeria        | Female | All Ages         | 0.25 | 0.1   | 0.41 | 0.002 |
| Nigeria        | Female | 15-49 years      | 0.38 | 0.22  | 0.54 | 0     |
| Nigeria        | Female | 50-69 years      | 0.15 | 0.02  | 0.28 | 0.029 |
| Nigeria        | Female | 70+ years        | 0.28 | 0.13  | 0.42 | 0.001 |
| Nigeria        | Female | Age-standardized | 0.23 | 0.09  | 0.37 | 0.002 |
| Nigeria        | Both   | All Ages         | 0.09 | -0.03 | 0.21 | 0.133 |
| Nigeria        | Both   | 15-49 years      | 0.41 | 0.3   | 0.52 | 0     |
| Nigeria        | Both   | 50-69 years      | 0.14 | 0.01  | 0.27 | 0.04  |
| Nigeria        | Both   | 70+ years        | 0.59 | 0.45  | 0.74 | 0     |
| South Korea    | Both   | Age-standardized | 0.84 | 0.8   | 0.88 | 0     |
| Middle SDI     | Male   | All Ages         | 2.03 | 2.01  | 2.04 | 0     |
| Middle SDI     | Male   | 15-49 years      | 1.32 | 1.27  | 1.36 | 0     |
| Middle SDI     | Male   | 50-69 years      | 0.93 | 0.91  | 0.95 | 0     |
| Middle SDI     | Male   | 70+ years        | 0.74 | 0.72  | 0.77 | 0     |
| Middle SDI     | Male   | Age-standardized | 0.94 | 0.93  | 0.96 | 0     |
| Middle SDI     | Female | All Ages         | 2.17 | 2.14  | 2.2  | 0     |
| Middle SDI     | Female | 15-49 years      | 1.36 | 1.31  | 1.42 | 0     |
| Middle SDI     | Female | 50-69 years      | 1.01 | 0.98  | 1.04 | 0     |
| Middle SDI     | Female | 70+ years        | 0.91 | 0.88  | 0.94 | 0     |
| Middle SDI     | Female | Age-standardized | 0.97 | 0.94  | 0.99 | 0     |
| Middle SDI     | Both   | All Ages         | 2.08 | 2.06  | 2.09 | 0     |
| Middle SDI     | Both   | 15-49 years      | 1.33 | 1.28  | 1.38 | 0     |
| Middle SDI     | Both   | 50-69 years      | 0.95 | 0.92  | 0.97 | 0     |
| Middle SDI     | Both   | 70+ years        | 0.83 | 0.8   | 0.86 | 0     |
| Middle SDI     | Both   | Age-standardized | 0.94 | 0.92  | 0.96 | 0     |
| South Korea    | Male   | All Ages         | 1.94 | 1.9   | 1.99 | 0     |
| South Korea    | Male   | 15-49 years      | 1.06 | 0.97  | 1.15 | 0     |
| South Korea    | Male   | 50-69 years      | 0.71 | 0.66  | 0.76 | 0     |
| South Korea    | Male   | 70+ years        | 0.48 | 0.45  | 0.5  | 0     |

|             |        |                  |      |      |      |   |
|-------------|--------|------------------|------|------|------|---|
| South Korea | Male   | Age-standardized | 0.69 | 0.65 | 0.73 | 0 |
| South Korea | Female | All Ages         | 2.44 | 2.37 | 2.51 | 0 |
| South Korea | Female | 15-49 years      | 1.29 | 1.19 | 1.4  | 0 |
| South Korea | Female | 50-69 years      | 0.97 | 0.89 | 1.06 | 0 |
| South Korea | Female | 70+ years        | 0.94 | 0.87 | 1.01 | 0 |
| South Korea | Female | Age-standardized | 0.96 | 0.9  | 1.02 | 0 |
| South Korea | Both   | All Ages         | 2.1  | 2.05 | 2.15 | 0 |
| South Korea | Both   | 15-49 years      | 1.14 | 1.06 | 1.23 | 0 |
| South Korea | Both   | 50-69 years      | 0.89 | 0.82 | 0.96 | 0 |
| South Korea | Both   | 70+ years        | 0.82 | 0.78 | 0.86 | 0 |
| Sri Lanka   | Both   | Age-standardized | 0.84 | 0.79 | 0.88 | 0 |
| Greenland   | Male   | All Ages         | 1.55 | 1.5  | 1.61 | 0 |
| Greenland   | Male   | 15-49 years      | 0.86 | 0.77 | 0.95 | 0 |
| Greenland   | Male   | 50-69 years      | 0.92 | 0.86 | 0.98 | 0 |
| Greenland   | Male   | 70+ years        | 0.65 | 0.6  | 0.69 | 0 |
| Greenland   | Male   | Age-standardized | 0.87 | 0.82 | 0.92 | 0 |
| Greenland   | Female | All Ages         | 1.48 | 1.41 | 1.54 | 0 |
| Greenland   | Female | 15-49 years      | 0.62 | 0.57 | 0.67 | 0 |
| Greenland   | Female | 50-69 years      | 0.62 | 0.57 | 0.67 | 0 |
| Greenland   | Female | 70+ years        | 0.69 | 0.63 | 0.75 | 0 |
| Greenland   | Female | Age-standardized | 0.65 | 0.62 | 0.69 | 0 |
| Greenland   | Both   | All Ages         | 1.5  | 1.45 | 1.56 | 0 |
| Greenland   | Both   | 15-49 years      | 0.69 | 0.62 | 0.77 | 0 |
| Greenland   | Both   | 50-69 years      | 0.87 | 0.8  | 0.95 | 0 |
| Greenland   | Both   | 70+ years        | 0.81 | 0.75 | 0.86 | 0 |
| Lesotho     | Both   | Age-standardized | 0.83 | 0.82 | 0.85 | 0 |
| Chile       | Male   | All Ages         | 2.04 | 1.9  | 2.18 | 0 |
| Chile       | Male   | 15-49 years      | 1.31 | 1.15 | 1.47 | 0 |
| Chile       | Male   | 50-69 years      | 1.05 | 0.94 | 1.16 | 0 |
| Chile       | Male   | 70+ years        | 0.79 | 0.68 | 0.9  | 0 |
| Chile       | Male   | Age-standardized | 1.08 | 0.97 | 1.2  | 0 |
| Chile       | Female | All Ages         | 2.24 | 2.15 | 2.33 | 0 |
| Chile       | Female | 15-49 years      | 1.41 | 1.29 | 1.53 | 0 |
| Chile       | Female | 50-69 years      | 1.17 | 1.09 | 1.24 | 0 |
| Chile       | Female | 70+ years        | 1.08 | 1    | 1.16 | 0 |
| Chile       | Female | Age-standardized | 1.2  | 1.12 | 1.28 | 0 |
| Chile       | Both   | All Ages         | 2.11 | 1.99 | 2.23 | 0 |
| Chile       | Both   | 15-49 years      | 1.36 | 1.21 | 1.5  | 0 |
| Chile       | Both   | 50-69 years      | 1.11 | 1.01 | 1.21 | 0 |
| Chile       | Both   | 70+ years        | 0.94 | 0.85 | 1.03 | 0 |
| Cambodia    | Both   | Age-standardized | 0.83 | 0.81 | 0.86 | 0 |
| Congo       | Male   | All Ages         | 1.5  | 1.46 | 1.55 | 0 |
| Congo       | Male   | 15-49 years      | 1.17 | 1.11 | 1.23 | 0 |
| Congo       | Male   | 50-69 years      | 0.66 | 0.62 | 0.69 | 0 |
| Congo       | Male   | 70+ years        | 0.67 | 0.63 | 0.7  | 0 |
| Congo       | Male   | Age-standardized | 0.71 | 0.68 | 0.75 | 0 |
| Congo       | Female | All Ages         | 0.97 | 0.91 | 1.03 | 0 |
| Congo       | Female | 15-49 years      | 0.74 | 0.68 | 0.8  | 0 |
| Congo       | Female | 50-69 years      | 0.33 | 0.28 | 0.37 | 0 |
| Congo       | Female | 70+ years        | 0.52 | 0.48 | 0.56 | 0 |
| Congo       | Female | Age-standardized | 0.42 | 0.38 | 0.45 | 0 |
| Congo       | Both   | All Ages         | 1.31 | 1.26 | 1.35 | 0 |
| Congo       | Both   | 15-49 years      | 1.01 | 0.97 | 1.06 | 0 |
| Congo       | Both   | 50-69 years      | 0.6  | 0.56 | 0.63 | 0 |
| Congo       | Both   | 70+ years        | 0.64 | 0.59 | 0.68 | 0 |
| Andorra     | Both   | Age-standardized | 0.82 | 0.71 | 0.92 | 0 |

|                      |        |                  |      |      |      |       |
|----------------------|--------|------------------|------|------|------|-------|
| Kazakhstan           | Male   | All Ages         | 1.06 | 1.02 | 1.09 | 0     |
| Kazakhstan           | Male   | 15-49 years      | 0.73 | 0.58 | 0.87 | 0     |
| Kazakhstan           | Male   | 50-69 years      | 0.19 | 0.08 | 0.3  | 0.002 |
| Kazakhstan           | Male   | 70+ years        | 0.45 | 0.39 | 0.5  | 0     |
| Kazakhstan           | Male   | Age-standardized | 0.44 | 0.34 | 0.55 | 0     |
| Kazakhstan           | Female | All Ages         | 0.85 | 0.79 | 0.9  | 0     |
| Kazakhstan           | Female | 15-49 years      | 0.48 | 0.36 | 0.6  | 0     |
| Kazakhstan           | Female | 50-69 years      | 0.19 | 0.07 | 0.3  | 0.003 |
| Kazakhstan           | Female | 70+ years        | 0.59 | 0.44 | 0.73 | 0     |
| Kazakhstan           | Female | Age-standardized | 0.38 | 0.27 | 0.5  | 0     |
| Kazakhstan           | Both   | All Ages         | 0.97 | 0.92 | 1.02 | 0     |
| Kazakhstan           | Both   | 15-49 years      | 0.63 | 0.49 | 0.77 | 0     |
| Kazakhstan           | Both   | 50-69 years      | 0.2  | 0.08 | 0.31 | 0.002 |
| Kazakhstan           | Both   | 70+ years        | 0.67 | 0.59 | 0.75 | 0     |
| Croatia              | Both   | Age-standardized | 0.81 | 0.73 | 0.88 | 0     |
| Madagascar           | Male   | All Ages         | 0.57 | 0.49 | 0.64 | 0     |
| Madagascar           | Male   | 15-49 years      | 0.56 | 0.53 | 0.59 | 0     |
| Madagascar           | Male   | 50-69 years      | 0.4  | 0.36 | 0.43 | 0     |
| Madagascar           | Male   | 70+ years        | 0.54 | 0.5  | 0.58 | 0     |
| Madagascar           | Male   | Age-standardized | 0.49 | 0.45 | 0.53 | 0     |
| Madagascar           | Female | All Ages         | 0.44 | 0.35 | 0.53 | 0     |
| Madagascar           | Female | 15-49 years      | 0.36 | 0.33 | 0.4  | 0     |
| Madagascar           | Female | 50-69 years      | 0.15 | 0.1  | 0.21 | 0     |
| Madagascar           | Female | 70+ years        | 0.36 | 0.31 | 0.41 | 0     |
| Madagascar           | Female | Age-standardized | 0.26 | 0.21 | 0.31 | 0     |
| Madagascar           | Both   | All Ages         | 0.52 | 0.44 | 0.6  | 0     |
| Madagascar           | Both   | 15-49 years      | 0.49 | 0.46 | 0.52 | 0     |
| Madagascar           | Both   | 50-69 years      | 0.31 | 0.26 | 0.36 | 0     |
| Madagascar           | Both   | 70+ years        | 0.27 | 0.22 | 0.31 | 0     |
| Virgin Islands, U.S. | Both   | Age-standardized | 0.8  | 0.73 | 0.87 | 0     |
| Slovenia             | Male   | All Ages         | 1.69 | 1.6  | 1.77 | 0     |
| Slovenia             | Male   | 15-49 years      | 1.17 | 1.12 | 1.21 | 0     |
| Slovenia             | Male   | 50-69 years      | 0.52 | 0.44 | 0.59 | 0     |
| Slovenia             | Male   | 70+ years        | 0.67 | 0.56 | 0.78 | 0     |
| Slovenia             | Male   | Age-standardized | 0.74 | 0.7  | 0.78 | 0     |
| Slovenia             | Female | All Ages         | 2.13 | 2.01 | 2.24 | 0     |
| Slovenia             | Female | 15-49 years      | 1.45 | 1.39 | 1.5  | 0     |
| Slovenia             | Female | 50-69 years      | 1.3  | 1.19 | 1.41 | 0     |
| Slovenia             | Female | 70+ years        | 1.31 | 1.18 | 1.43 | 0     |
| Slovenia             | Female | Age-standardized | 1.3  | 1.24 | 1.36 | 0     |
| Slovenia             | Both   | All Ages         | 1.88 | 1.78 | 1.98 | 0     |
| Slovenia             | Both   | 15-49 years      | 1.28 | 1.24 | 1.32 | 0     |
| Slovenia             | Both   | 50-69 years      | 0.93 | 0.84 | 1.03 | 0     |
| Slovenia             | Both   | 70+ years        | 1.14 | 1.02 | 1.26 | 0     |
| Albania              | Both   | Age-standardized | 0.78 | 0.74 | 0.82 | 0     |
| Saudi Arabia         | Male   | All Ages         | 2.54 | 2.48 | 2.59 | 0     |
| Saudi Arabia         | Male   | 15-49 years      | 1.57 | 1.49 | 1.64 | 0     |
| Saudi Arabia         | Male   | 50-69 years      | 1.03 | 0.98 | 1.08 | 0     |
| Saudi Arabia         | Male   | 70+ years        | 0.88 | 0.83 | 0.94 | 0     |
| Saudi Arabia         | Male   | Age-standardized | 1.13 | 1.07 | 1.2  | 0     |
| Saudi Arabia         | Female | All Ages         | 3.35 | 3.24 | 3.46 | 0     |
| Saudi Arabia         | Female | 15-49 years      | 2.02 | 1.9  | 2.15 | 0     |
| Saudi Arabia         | Female | 50-69 years      | 1.45 | 1.31 | 1.59 | 0     |
| Saudi Arabia         | Female | 70+ years        | 1.31 | 1.15 | 1.46 | 0     |
| Saudi Arabia         | Female | Age-standardized | 1.49 | 1.35 | 1.63 | 0     |
| Saudi Arabia         | Both   | All Ages         | 2.83 | 2.77 | 2.89 | 0     |

|              |        |                  |      |      |      |   |
|--------------|--------|------------------|------|------|------|---|
| Saudi Arabia | Both   | 15-49 years      | 1.7  | 1.61 | 1.78 | 0 |
| Saudi Arabia | Both   | 50-69 years      | 1.16 | 1.09 | 1.23 | 0 |
| Saudi Arabia | Both   | 70+ years        | 1.08 | 1    | 1.15 | 0 |
| Italy        | Both   | Age-standardized | 0.78 | 0.68 | 0.89 | 0 |
| Saint Lucia  | Male   | All Ages         | 2.65 | 2.55 | 2.74 | 0 |
| Saint Lucia  | Male   | 15-49 years      | 1.62 | 1.51 | 1.73 | 0 |
| Saint Lucia  | Male   | 50-69 years      | 0.92 | 0.84 | 0.99 | 0 |
| Saint Lucia  | Male   | 70+ years        | 0.66 | 0.6  | 0.73 | 0 |
| Saint Lucia  | Male   | Age-standardized | 1.02 | 0.94 | 1.1  | 0 |
| Saint Lucia  | Female | All Ages         | 2.61 | 2.48 | 2.73 | 0 |
| Saint Lucia  | Female | 15-49 years      | 1.67 | 1.51 | 1.82 | 0 |
| Saint Lucia  | Female | 50-69 years      | 0.97 | 0.84 | 1.11 | 0 |
| Saint Lucia  | Female | 70+ years        | 0.87 | 0.72 | 1.02 | 0 |
| Saint Lucia  | Female | Age-standardized | 1.05 | 0.92 | 1.19 | 0 |
| Saint Lucia  | Both   | All Ages         | 2.65 | 2.54 | 2.75 | 0 |
| Saint Lucia  | Both   | 15-49 years      | 1.66 | 1.53 | 1.79 | 0 |
| Saint Lucia  | Both   | 50-69 years      | 1    | 0.89 | 1.1  | 0 |
| Saint Lucia  | Both   | 70+ years        | 0.8  | 0.7  | 0.91 | 0 |
| Ecuador      | Both   | Age-standardized | 0.78 | 0.73 | 0.84 | 0 |
| Global       | Male   | All Ages         | 1.69 | 1.68 | 1.7  | 0 |
| Global       | Male   | 15-49 years      | 1.23 | 1.2  | 1.26 | 0 |
| Global       | Male   | 50-69 years      | 0.99 | 0.97 | 1.01 | 0 |
| Global       | Male   | 70+ years        | 0.77 | 0.75 | 0.8  | 0 |
| Global       | Male   | Age-standardized | 1    | 0.99 | 1.02 | 0 |
| Global       | Female | All Ages         | 1.82 | 1.8  | 1.83 | 0 |
| Global       | Female | 15-49 years      | 1.3  | 1.26 | 1.34 | 0 |
| Global       | Female | 50-69 years      | 1.18 | 1.16 | 1.2  | 0 |
| Global       | Female | 70+ years        | 1    | 0.97 | 1.04 | 0 |
| Global       | Female | Age-standardized | 1.12 | 1.1  | 1.13 | 0 |
| Global       | Both   | All Ages         | 1.74 | 1.73 | 1.75 | 0 |
| Global       | Both   | 15-49 years      | 1.25 | 1.22 | 1.28 | 0 |
| Global       | Both   | 50-69 years      | 1.06 | 1.04 | 1.08 | 0 |
| Global       | Both   | 70+ years        | 0.93 | 0.89 | 0.96 | 0 |
| Global       | Both   | Age-standardized | 1.05 | 1.04 | 1.07 | 0 |
| Finland      | Male   | All Ages         | 2.19 | 2    | 2.38 | 0 |
| Finland      | Male   | 15-49 years      | 1.67 | 1.5  | 1.84 | 0 |
| Finland      | Male   | 50-69 years      | 1.75 | 1.6  | 1.91 | 0 |
| Finland      | Male   | 70+ years        | 1.49 | 1.33 | 1.65 | 0 |
| Finland      | Male   | Age-standardized | 1.73 | 1.56 | 1.9  | 0 |
| Finland      | Female | All Ages         | 1.92 | 1.8  | 2.03 | 0 |
| Finland      | Female | 15-49 years      | 1.41 | 1.31 | 1.51 | 0 |
| Finland      | Female | 50-69 years      | 1.53 | 1.43 | 1.62 | 0 |
| Finland      | Female | 70+ years        | 1.33 | 1.21 | 1.44 | 0 |
| Finland      | Female | Age-standardized | 1.49 | 1.37 | 1.6  | 0 |
| Finland      | Both   | All Ages         | 2.12 | 1.96 | 2.28 | 0 |
| Finland      | Both   | 15-49 years      | 1.61 | 1.46 | 1.75 | 0 |
| Finland      | Both   | 50-69 years      | 1.74 | 1.59 | 1.89 | 0 |
| Finland      | Both   | 70+ years        | 1.65 | 1.51 | 1.79 | 0 |
| Fiji         | Both   | Age-standardized | 0.78 | 0.71 | 0.86 | 0 |
| Tunisia      | Male   | All Ages         | 2.2  | 2.18 | 2.22 | 0 |
| Tunisia      | Male   | 15-49 years      | 1.38 | 1.35 | 1.42 | 0 |
| Tunisia      | Male   | 50-69 years      | 0.83 | 0.81 | 0.86 | 0 |
| Tunisia      | Male   | 70+ years        | 0.63 | 0.62 | 0.65 | 0 |
| Tunisia      | Male   | Age-standardized | 0.86 | 0.84 | 0.88 | 0 |
| Tunisia      | Female | All Ages         | 2.45 | 2.43 | 2.48 | 0 |
| Tunisia      | Female | 15-49 years      | 1.55 | 1.5  | 1.6  | 0 |

|                       |        |                  |       |       |       |       |
|-----------------------|--------|------------------|-------|-------|-------|-------|
| Tunisia               | Female | 50-69 years      | 0.99  | 0.97  | 1.01  | 0     |
| Tunisia               | Female | 70+ years        | 0.83  | 0.82  | 0.84  | 0     |
| Tunisia               | Female | Age-standardized | 1.01  | 0.99  | 1.03  | 0     |
| Tunisia               | Both   | All Ages         | 2.28  | 2.27  | 2.3   | 0     |
| Tunisia               | Both   | 15-49 years      | 1.43  | 1.39  | 1.47  | 0     |
| Tunisia               | Both   | 50-69 years      | 0.88  | 0.86  | 0.91  | 0     |
| Tunisia               | Both   | 70+ years        | 0.62  | 0.61  | 0.63  | 0     |
| Greenland             | Both   | Age-standardized | 0.78  | 0.73  | 0.83  | 0     |
| Bulgaria              | Male   | All Ages         | 0.5   | 0.39  | 0.62  | 0     |
| Bulgaria              | Male   | 15-49 years      | 0.33  | 0.12  | 0.55  | 0.003 |
| Bulgaria              | Male   | 50-69 years      | -0.35 | -0.53 | -0.18 | 0     |
| Bulgaria              | Male   | 70+ years        | -0.16 | -0.24 | -0.07 | 0.001 |
| Bulgaria              | Male   | Age-standardized | -0.06 | -0.2  | 0.09  | 0.425 |
| Bulgaria              | Female | All Ages         | 1.2   | 1.08  | 1.32  | 0     |
| Bulgaria              | Female | 15-49 years      | 0.49  | 0.31  | 0.68  | 0     |
| Bulgaria              | Female | 50-69 years      | 0.38  | 0.17  | 0.59  | 0.001 |
| Bulgaria              | Female | 70+ years        | 0.34  | 0.19  | 0.48  | 0     |
| Bulgaria              | Female | Age-standardized | 0.33  | 0.18  | 0.48  | 0     |
| Bulgaria              | Both   | All Ages         | 0.77  | 0.65  | 0.89  | 0     |
| Bulgaria              | Both   | 15-49 years      | 0.42  | 0.22  | 0.63  | 0     |
| Bulgaria              | Both   | 50-69 years      | -0.06 | -0.26 | 0.14  | 0.543 |
| Bulgaria              | Both   | 70+ years        | 0.02  | -0.1  | 0.14  | 0.749 |
| Bulgaria              | Both   | Age-standardized | 0.11  | -0.05 | 0.26  | 0.171 |
| Cote d'Ivoire         | Male   | All Ages         | 1.7   | 1.55  | 1.85  | 0     |
| Cote d'Ivoire         | Male   | 15-49 years      | 1.39  | 1.26  | 1.51  | 0     |
| Cote d'Ivoire         | Male   | 50-69 years      | 1.14  | 1.02  | 1.27  | 0     |
| Cote d'Ivoire         | Male   | 70+ years        | 1.16  | 1     | 1.31  | 0     |
| Cote d'Ivoire         | Male   | Age-standardized | 1.2   | 1.06  | 1.34  | 0     |
| Cote d'Ivoire         | Female | All Ages         | 1.46  | 1.28  | 1.64  | 0     |
| Cote d'Ivoire         | Female | 15-49 years      | 1.06  | 0.92  | 1.2   | 0     |
| Cote d'Ivoire         | Female | 50-69 years      | 0.84  | 0.69  | 1     | 0     |
| Cote d'Ivoire         | Female | 70+ years        | 0.98  | 0.81  | 1.15  | 0     |
| Cote d'Ivoire         | Female | Age-standardized | 0.9   | 0.74  | 1.07  | 0     |
| Cote d'Ivoire         | Both   | All Ages         | 1.62  | 1.46  | 1.78  | 0     |
| Cote d'Ivoire         | Both   | 15-49 years      | 1.27  | 1.15  | 1.4   | 0     |
| Cote d'Ivoire         | Both   | 50-69 years      | 1.03  | 0.9   | 1.16  | 0     |
| Cote d'Ivoire         | Both   | 70+ years        | 1.02  | 0.86  | 1.18  | 0     |
| Sao Tome and Principe | Both   | Age-standardized | 0.78  | 0.75  | 0.81  | 0     |
| Cambodia              | Male   | All Ages         | 2.24  | 2.14  | 2.35  | 0     |
| Cambodia              | Male   | 15-49 years      | 0.97  | 0.91  | 1.03  | 0     |
| Cambodia              | Male   | 50-69 years      | 0.77  | 0.74  | 0.81  | 0     |
| Cambodia              | Male   | 70+ years        | 0.63  | 0.6   | 0.66  | 0     |
| Cambodia              | Male   | Age-standardized | 0.75  | 0.72  | 0.78  | 0     |
| Cambodia              | Female | All Ages         | 2.2   | 2.12  | 2.29  | 0     |
| Cambodia              | Female | 15-49 years      | 0.98  | 0.92  | 1.04  | 0     |
| Cambodia              | Female | 50-69 years      | 0.93  | 0.91  | 0.95  | 0     |
| Cambodia              | Female | 70+ years        | 0.79  | 0.76  | 0.82  | 0     |
| Cambodia              | Female | Age-standardized | 0.87  | 0.85  | 0.9   | 0     |
| Cambodia              | Both   | All Ages         | 2.23  | 2.14  | 2.32  | 0     |
| Cambodia              | Both   | 15-49 years      | 1.02  | 0.96  | 1.07  | 0     |
| Cambodia              | Both   | 50-69 years      | 0.85  | 0.82  | 0.87  | 0     |
| Cambodia              | Both   | 70+ years        | 0.68  | 0.66  | 0.7   | 0     |
| Barbados              | Both   | Age-standardized | 0.77  | 0.71  | 0.83  | 0     |
| The Bahamas           | Male   | All Ages         | 1.64  | 1.58  | 1.69  | 0     |
| The Bahamas           | Male   | 15-49 years      | 1.02  | 0.89  | 1.15  | 0     |
| The Bahamas           | Male   | 50-69 years      | 0.62  | 0.54  | 0.7   | 0     |



|                    |        |                  |      |      |      |   |
|--------------------|--------|------------------|------|------|------|---|
| The Bahamas        | Male   | 70+ years        | 0.45 | 0.4  | 0.5  | 0 |
| The Bahamas        | Male   | Age-standardized | 0.66 | 0.59 | 0.73 | 0 |
| The Bahamas        | Female | All Ages         | 1.59 | 1.55 | 1.63 | 0 |
| The Bahamas        | Female | 15-49 years      | 1.01 | 0.89 | 1.13 | 0 |
| The Bahamas        | Female | 50-69 years      | 0.62 | 0.56 | 0.68 | 0 |
| The Bahamas        | Female | 70+ years        | 0.53 | 0.49 | 0.58 | 0 |
| The Bahamas        | Female | Age-standardized | 0.65 | 0.59 | 0.7  | 0 |
| The Bahamas        | Both   | All Ages         | 1.61 | 1.56 | 1.65 | 0 |
| The Bahamas        | Both   | 15-49 years      | 1.01 | 0.89 | 1.13 | 0 |
| The Bahamas        | Both   | 50-69 years      | 0.62 | 0.55 | 0.69 | 0 |
| The Bahamas        | Both   | 70+ years        | 0.56 | 0.52 | 0.6  | 0 |
| Moldova            | Both   | Age-standardized | 0.75 | 0.62 | 0.89 | 0 |
| Papua New Guinea   | Male   | All Ages         | 1.26 | 1.21 | 1.31 | 0 |
| Papua New Guinea   | Male   | 15-49 years      | 1.01 | 0.99 | 1.04 | 0 |
| Papua New Guinea   | Male   | 50-69 years      | 0.89 | 0.85 | 0.92 | 0 |
| Papua New Guinea   | Male   | 70+ years        | 0.79 | 0.75 | 0.83 | 0 |
| Papua New Guinea   | Male   | Age-standardized | 0.9  | 0.87 | 0.93 | 0 |
| Papua New Guinea   | Female | All Ages         | 1.53 | 1.5  | 1.57 | 0 |
| Papua New Guinea   | Female | 15-49 years      | 1.31 | 1.27 | 1.36 | 0 |
| Papua New Guinea   | Female | 50-69 years      | 1.21 | 1.16 | 1.25 | 0 |
| Papua New Guinea   | Female | 70+ years        | 1.02 | 0.96 | 1.08 | 0 |
| Papua New Guinea   | Female | Age-standardized | 1.17 | 1.13 | 1.22 | 0 |
| Papua New Guinea   | Both   | All Ages         | 1.39 | 1.34 | 1.43 | 0 |
| Papua New Guinea   | Both   | 15-49 years      | 1.15 | 1.12 | 1.18 | 0 |
| Papua New Guinea   | Both   | 50-69 years      | 1.03 | 1    | 1.07 | 0 |
| Papua New Guinea   | Both   | 70+ years        | 0.91 | 0.86 | 0.95 | 0 |
| Ukraine            | Both   | Age-standardized | 0.73 | 0.65 | 0.82 | 0 |
| Yemen              | Male   | All Ages         | 2.02 | 1.96 | 2.08 | 0 |
| Yemen              | Male   | 15-49 years      | 1.37 | 1.25 | 1.49 | 0 |
| Yemen              | Male   | 50-69 years      | 1.2  | 1.17 | 1.23 | 0 |
| Yemen              | Male   | 70+ years        | 1    | 0.98 | 1.02 | 0 |
| Yemen              | Male   | Age-standardized | 1.17 | 1.14 | 1.19 | 0 |
| Yemen              | Female | All Ages         | 2.02 | 1.93 | 2.12 | 0 |
| Yemen              | Female | 15-49 years      | 1.4  | 1.28 | 1.51 | 0 |
| Yemen              | Female | 50-69 years      | 1.23 | 1.2  | 1.25 | 0 |
| Yemen              | Female | 70+ years        | 1.13 | 1.11 | 1.16 | 0 |
| Yemen              | Female | Age-standardized | 1.25 | 1.22 | 1.28 | 0 |
| Yemen              | Both   | All Ages         | 2.01 | 1.94 | 2.08 | 0 |
| Yemen              | Both   | 15-49 years      | 1.38 | 1.27 | 1.49 | 0 |
| Yemen              | Both   | 50-69 years      | 1.16 | 1.14 | 1.18 | 0 |
| Yemen              | Both   | 70+ years        | 1.13 | 1.11 | 1.16 | 0 |
| Russian Federation | Both   | Age-standardized | 0.73 | 0.64 | 0.81 | 0 |
| Mexico             | Male   | All Ages         | 2.25 | 2.17 | 2.34 | 0 |
| Mexico             | Male   | 15-49 years      | 1.53 | 1.43 | 1.62 | 0 |
| Mexico             | Male   | 50-69 years      | 1.05 | 0.97 | 1.13 | 0 |
| Mexico             | Male   | 70+ years        | 0.76 | 0.7  | 0.83 | 0 |
| Mexico             | Male   | Age-standardized | 1.1  | 1.03 | 1.18 | 0 |
| Mexico             | Female | All Ages         | 2.33 | 2.26 | 2.4  | 0 |
| Mexico             | Female | 15-49 years      | 1.52 | 1.45 | 1.59 | 0 |
| Mexico             | Female | 50-69 years      | 1.07 | 1.02 | 1.12 | 0 |
| Mexico             | Female | 70+ years        | 1.03 | 0.95 | 1.1  | 0 |
| Mexico             | Female | Age-standardized | 1.08 | 1.02 | 1.13 | 0 |
| Mexico             | Both   | All Ages         | 2.28 | 2.22 | 2.34 | 0 |
| Mexico             | Both   | 15-49 years      | 1.53 | 1.46 | 1.59 | 0 |
| Mexico             | Both   | 50-69 years      | 1.04 | 0.99 | 1.1  | 0 |
| Mexico             | Both   | 70+ years        | 0.86 | 0.8  | 0.92 | 0 |

|                     |        |                  |      |      |      |   |
|---------------------|--------|------------------|------|------|------|---|
| India               | Both   | Age-standardized | 0.72 | 0.71 | 0.74 | 0 |
| Greece              | Male   | All Ages         | 1.57 | 1.39 | 1.75 | 0 |
| Greece              | Male   | 15-49 years      | 1.43 | 1.28 | 1.58 | 0 |
| Greece              | Male   | 50-69 years      | 1    | 0.85 | 1.16 | 0 |
| Greece              | Male   | 70+ years        | 0.73 | 0.57 | 0.89 | 0 |
| Greece              | Male   | Age-standardized | 1.04 | 0.89 | 1.19 | 0 |
| Greece              | Female | All Ages         | 1.92 | 1.73 | 2.11 | 0 |
| Greece              | Female | 15-49 years      | 1.57 | 1.41 | 1.74 | 0 |
| Greece              | Female | 50-69 years      | 1.24 | 1.05 | 1.42 | 0 |
| Greece              | Female | 70+ years        | 1.2  | 1.01 | 1.39 | 0 |
| Greece              | Female | Age-standardized | 1.24 | 1.07 | 1.41 | 0 |
| Greece              | Both   | All Ages         | 1.69 | 1.51 | 1.88 | 0 |
| Greece              | Both   | 15-49 years      | 1.48 | 1.32 | 1.65 | 0 |
| Greece              | Both   | 50-69 years      | 1.1  | 0.94 | 1.26 | 0 |
| Greece              | Both   | 70+ years        | 0.96 | 0.78 | 1.14 | 0 |
| Canada              | Both   | Age-standardized | 0.72 | 0.64 | 0.8  | 0 |
| Sri Lanka           | Male   | All Ages         | 1.75 | 1.68 | 1.82 | 0 |
| Sri Lanka           | Male   | 15-49 years      | 1.15 | 1.07 | 1.23 | 0 |
| Sri Lanka           | Male   | 50-69 years      | 0.92 | 0.85 | 1    | 0 |
| Sri Lanka           | Male   | 70+ years        | 0.79 | 0.72 | 0.85 | 0 |
| Sri Lanka           | Male   | Age-standardized | 0.9  | 0.83 | 0.97 | 0 |
| Sri Lanka           | Female | All Ages         | 1.95 | 1.9  | 2    | 0 |
| Sri Lanka           | Female | 15-49 years      | 1.11 | 1.07 | 1.14 | 0 |
| Sri Lanka           | Female | 50-69 years      | 0.93 | 0.89 | 0.96 | 0 |
| Sri Lanka           | Female | 70+ years        | 0.71 | 0.7  | 0.73 | 0 |
| Sri Lanka           | Female | Age-standardized | 0.83 | 0.8  | 0.86 | 0 |
| Sri Lanka           | Both   | All Ages         | 1.82 | 1.77 | 1.88 | 0 |
| Sri Lanka           | Both   | 15-49 years      | 1.12 | 1.06 | 1.17 | 0 |
| Sri Lanka           | Both   | 50-69 years      | 0.9  | 0.85 | 0.95 | 0 |
| Sri Lanka           | Both   | 70+ years        | 0.66 | 0.63 | 0.69 | 0 |
| Kenya               | Both   | Age-standardized | 0.72 | 0.68 | 0.76 | 0 |
| Algeria             | Male   | All Ages         | 2.9  | 2.79 | 3    | 0 |
| Algeria             | Male   | 15-49 years      | 1.9  | 1.75 | 2.06 | 0 |
| Algeria             | Male   | 50-69 years      | 1.28 | 1.18 | 1.38 | 0 |
| Algeria             | Male   | 70+ years        | 1.03 | 0.93 | 1.13 | 0 |
| Algeria             | Male   | Age-standardized | 1.32 | 1.22 | 1.42 | 0 |
| Algeria             | Female | All Ages         | 2.79 | 2.71 | 2.86 | 0 |
| Algeria             | Female | 15-49 years      | 1.86 | 1.74 | 1.99 | 0 |
| Algeria             | Female | 50-69 years      | 1.24 | 1.19 | 1.29 | 0 |
| Algeria             | Female | 70+ years        | 1.05 | 0.98 | 1.12 | 0 |
| Algeria             | Female | Age-standardized | 1.27 | 1.21 | 1.32 | 0 |
| Algeria             | Both   | All Ages         | 2.85 | 2.76 | 2.95 | 0 |
| Algeria             | Both   | 15-49 years      | 1.88 | 1.74 | 2.02 | 0 |
| Algeria             | Both   | 50-69 years      | 1.31 | 1.24 | 1.38 | 0 |
| Algeria             | Both   | 70+ years        | 1.06 | 0.96 | 1.16 | 0 |
| North Korea         | Both   | Age-standardized | 0.71 | 0.68 | 0.74 | 0 |
| Trinidad and Tobago | Male   | All Ages         | 2.39 | 2.28 | 2.5  | 0 |
| Trinidad and Tobago | Male   | 15-49 years      | 1.52 | 1.47 | 1.57 | 0 |
| Trinidad and Tobago | Male   | 50-69 years      | 1.01 | 0.97 | 1.06 | 0 |
| Trinidad and Tobago | Male   | 70+ years        | 0.74 | 0.7  | 0.77 | 0 |
| Trinidad and Tobago | Male   | Age-standardized | 1.1  | 1.05 | 1.15 | 0 |
| Trinidad and Tobago | Female | All Ages         | 2.56 | 2.46 | 2.67 | 0 |
| Trinidad and Tobago | Female | 15-49 years      | 1.56 | 1.49 | 1.63 | 0 |
| Trinidad and Tobago | Female | 50-69 years      | 1.18 | 1.1  | 1.25 | 0 |
| Trinidad and Tobago | Female | 70+ years        | 1.04 | 0.97 | 1.12 | 0 |
| Trinidad and Tobago | Female | Age-standardized | 1.2  | 1.13 | 1.28 | 0 |

|                     |        |                  |      |      |      |   |
|---------------------|--------|------------------|------|------|------|---|
| Trinidad and Tobago | Both   | All Ages         | 2.46 | 2.35 | 2.56 | 0 |
| Trinidad and Tobago | Both   | 15-49 years      | 1.54 | 1.49 | 1.6  | 0 |
| Trinidad and Tobago | Both   | 50-69 years      | 1.1  | 1.04 | 1.15 | 0 |
| Trinidad and Tobago | Both   | 70+ years        | 0.85 | 0.81 | 0.89 | 0 |
| Niger               | Both   | Age-standardized | 0.71 | 0.65 | 0.76 | 0 |
| Djibouti            | Male   | All Ages         | 2.4  | 2.35 | 2.46 | 0 |
| Djibouti            | Male   | 15-49 years      | 1.71 | 1.65 | 1.76 | 0 |
| Djibouti            | Male   | 50-69 years      | 1.28 | 1.23 | 1.34 | 0 |
| Djibouti            | Male   | 70+ years        | 1.26 | 1.21 | 1.31 | 0 |
| Djibouti            | Male   | Age-standardized | 1.32 | 1.27 | 1.38 | 0 |
| Djibouti            | Female | All Ages         | 2.42 | 2.3  | 2.55 | 0 |
| Djibouti            | Female | 15-49 years      | 1.62 | 1.47 | 1.76 | 0 |
| Djibouti            | Female | 50-69 years      | 1.13 | 1.03 | 1.22 | 0 |
| Djibouti            | Female | 70+ years        | 1.27 | 1.18 | 1.35 | 0 |
| Djibouti            | Female | Age-standardized | 1.19 | 1.1  | 1.28 | 0 |
| Djibouti            | Both   | All Ages         | 2.4  | 2.33 | 2.47 | 0 |
| Djibouti            | Both   | 15-49 years      | 1.62 | 1.55 | 1.7  | 0 |
| Djibouti            | Both   | 50-69 years      | 1.3  | 1.23 | 1.37 | 0 |
| Djibouti            | Both   | 70+ years        | 1.3  | 1.25 | 1.34 | 0 |
| Philippines         | Both   | Age-standardized | 0.71 | 0.63 | 0.8  | 0 |
| Swaziland           | Male   | All Ages         | 1.41 | 1.39 | 1.44 | 0 |
| Swaziland           | Male   | 15-49 years      | 0.69 | 0.65 | 0.73 | 0 |
| Swaziland           | Male   | 50-69 years      | 0.47 | 0.46 | 0.49 | 0 |
| Swaziland           | Male   | 70+ years        | 0.45 | 0.43 | 0.47 | 0 |
| Swaziland           | Male   | Age-standardized | 0.48 | 0.47 | 0.5  | 0 |
| Swaziland           | Female | All Ages         | 1.28 | 1.23 | 1.34 | 0 |
| Swaziland           | Female | 15-49 years      | 0.48 | 0.43 | 0.54 | 0 |
| Swaziland           | Female | 50-69 years      | 0.39 | 0.34 | 0.43 | 0 |
| Swaziland           | Female | 70+ years        | 0.49 | 0.45 | 0.54 | 0 |
| Swaziland           | Female | Age-standardized | 0.4  | 0.35 | 0.45 | 0 |
| Swaziland           | Both   | All Ages         | 1.38 | 1.35 | 1.42 | 0 |
| Swaziland           | Both   | 15-49 years      | 0.68 | 0.63 | 0.72 | 0 |
| Swaziland           | Both   | 50-69 years      | 0.34 | 0.31 | 0.36 | 0 |
| Swaziland           | Both   | 70+ years        | 0.38 | 0.36 | 0.4  | 0 |
| South Africa        | Both   | Age-standardized | 0.7  | 0.65 | 0.74 | 0 |
| Turkmenistan        | Male   | All Ages         | 2.49 | 2.41 | 2.57 | 0 |
| Turkmenistan        | Male   | 15-49 years      | 1.65 | 1.57 | 1.73 | 0 |
| Turkmenistan        | Male   | 50-69 years      | 0.81 | 0.73 | 0.88 | 0 |
| Turkmenistan        | Male   | 70+ years        | 1.25 | 1.21 | 1.29 | 0 |
| Turkmenistan        | Male   | Age-standardized | 1.2  | 1.15 | 1.26 | 0 |
| Turkmenistan        | Female | All Ages         | 2.41 | 2.32 | 2.51 | 0 |
| Turkmenistan        | Female | 15-49 years      | 1.57 | 1.51 | 1.64 | 0 |
| Turkmenistan        | Female | 50-69 years      | 0.93 | 0.87 | 0.99 | 0 |
| Turkmenistan        | Female | 70+ years        | 1.57 | 1.49 | 1.64 | 0 |
| Turkmenistan        | Female | Age-standardized | 1.31 | 1.23 | 1.4  | 0 |
| Turkmenistan        | Both   | All Ages         | 2.47 | 2.39 | 2.56 | 0 |
| Turkmenistan        | Both   | 15-49 years      | 1.66 | 1.59 | 1.74 | 0 |
| Turkmenistan        | Both   | 50-69 years      | 0.86 | 0.79 | 0.92 | 0 |
| Turkmenistan        | Both   | 70+ years        | 1.54 | 1.49 | 1.6  | 0 |
| Tanzania            | Both   | Age-standardized | 0.69 | 0.65 | 0.72 | 0 |
| Barbados            | Male   | All Ages         | 1.62 | 1.57 | 1.67 | 0 |
| Barbados            | Male   | 15-49 years      | 1.19 | 1.08 | 1.31 | 0 |
| Barbados            | Male   | 50-69 years      | 0.78 | 0.75 | 0.81 | 0 |
| Barbados            | Male   | 70+ years        | 0.63 | 0.59 | 0.66 | 0 |
| Barbados            | Male   | Age-standardized | 0.86 | 0.81 | 0.91 | 0 |
| Barbados            | Female | All Ages         | 1.32 | 1.24 | 1.39 | 0 |

|            |        |                  |      |      |      |   |
|------------|--------|------------------|------|------|------|---|
| Barbados   | Female | 15-49 years      | 0.93 | 0.78 | 1.08 | 0 |
| Barbados   | Female | 50-69 years      | 0.54 | 0.48 | 0.61 | 0 |
| Barbados   | Female | 70+ years        | 0.52 | 0.43 | 0.61 | 0 |
| Barbados   | Female | Age-standardized | 0.61 | 0.53 | 0.69 | 0 |
| Barbados   | Both   | All Ages         | 1.49 | 1.43 | 1.55 | 0 |
| Barbados   | Both   | 15-49 years      | 1.08 | 0.95 | 1.21 | 0 |
| Barbados   | Both   | 50-69 years      | 0.7  | 0.65 | 0.76 | 0 |
| Barbados   | Both   | 70+ years        | 0.61 | 0.55 | 0.66 | 0 |
| Chad       | Both   | Age-standardized | 0.69 | 0.67 | 0.71 | 0 |
| Senegal    | Male   | All Ages         | 1.03 | 0.91 | 1.14 | 0 |
| Senegal    | Male   | 15-49 years      | 0.7  | 0.63 | 0.78 | 0 |
| Senegal    | Male   | 50-69 years      | 0.58 | 0.52 | 0.64 | 0 |
| Senegal    | Male   | 70+ years        | 0.57 | 0.48 | 0.66 | 0 |
| Senegal    | Male   | Age-standardized | 0.63 | 0.55 | 0.7  | 0 |
| Senegal    | Female | All Ages         | 0.88 | 0.75 | 1.01 | 0 |
| Senegal    | Female | 15-49 years      | 0.42 | 0.31 | 0.53 | 0 |
| Senegal    | Female | 50-69 years      | 0.24 | 0.14 | 0.35 | 0 |
| Senegal    | Female | 70+ years        | 0.32 | 0.21 | 0.42 | 0 |
| Senegal    | Female | Age-standardized | 0.29 | 0.18 | 0.4  | 0 |
| Senegal    | Both   | All Ages         | 1    | 0.87 | 1.12 | 0 |
| Senegal    | Both   | 15-49 years      | 0.62 | 0.54 | 0.71 | 0 |
| Senegal    | Both   | 50-69 years      | 0.42 | 0.35 | 0.49 | 0 |
| Senegal    | Both   | 70+ years        | 0.4  | 0.3  | 0.49 | 0 |
| Latvia     | Both   | Age-standardized | 0.68 | 0.59 | 0.78 | 0 |
| Eritrea    | Male   | All Ages         | 1.17 | 1.08 | 1.25 | 0 |
| Eritrea    | Male   | 15-49 years      | 0.69 | 0.65 | 0.74 | 0 |
| Eritrea    | Male   | 50-69 years      | 0.48 | 0.43 | 0.53 | 0 |
| Eritrea    | Male   | 70+ years        | 0.56 | 0.52 | 0.6  | 0 |
| Eritrea    | Male   | Age-standardized | 0.54 | 0.49 | 0.58 | 0 |
| Eritrea    | Female | All Ages         | 0.83 | 0.72 | 0.94 | 0 |
| Eritrea    | Female | 15-49 years      | 0.38 | 0.34 | 0.42 | 0 |
| Eritrea    | Female | 50-69 years      | 0.26 | 0.22 | 0.3  | 0 |
| Eritrea    | Female | 70+ years        | 0.42 | 0.38 | 0.47 | 0 |
| Eritrea    | Female | Age-standardized | 0.33 | 0.29 | 0.37 | 0 |
| Eritrea    | Both   | All Ages         | 1.03 | 0.93 | 1.12 | 0 |
| Eritrea    | Both   | 15-49 years      | 0.59 | 0.55 | 0.63 | 0 |
| Eritrea    | Both   | 50-69 years      | 0.34 | 0.3  | 0.37 | 0 |
| Eritrea    | Both   | 70+ years        | 0.4  | 0.36 | 0.43 | 0 |
| Tajikistan | Both   | Age-standardized | 0.67 | 0.58 | 0.76 | 0 |
| Singapore  | Male   | All Ages         | 1.77 | 1.72 | 1.81 | 0 |
| Singapore  | Male   | 15-49 years      | 1.21 | 1.1  | 1.33 | 0 |
| Singapore  | Male   | 50-69 years      | 0.96 | 0.88 | 1.04 | 0 |
| Singapore  | Male   | 70+ years        | 0.69 | 0.62 | 0.76 | 0 |
| Singapore  | Male   | Age-standardized | 0.97 | 0.89 | 1.06 | 0 |
| Singapore  | Female | All Ages         | 1.92 | 1.85 | 1.99 | 0 |
| Singapore  | Female | 15-49 years      | 1.29 | 1.13 | 1.46 | 0 |
| Singapore  | Female | 50-69 years      | 1.25 | 1.14 | 1.35 | 0 |
| Singapore  | Female | 70+ years        | 1.06 | 0.97 | 1.16 | 0 |
| Singapore  | Female | Age-standardized | 1.23 | 1.1  | 1.35 | 0 |
| Singapore  | Both   | All Ages         | 1.73 | 1.67 | 1.79 | 0 |
| Singapore  | Both   | 15-49 years      | 1.13 | 0.99 | 1.27 | 0 |
| Singapore  | Both   | 50-69 years      | 1.07 | 0.98 | 1.16 | 0 |
| Singapore  | Both   | 70+ years        | 0.88 | 0.8  | 0.96 | 0 |
| Ethiopia   | Both   | Age-standardized | 0.66 | 0.64 | 0.68 | 0 |
| Uruguay    | Male   | All Ages         | 1.53 | 1.48 | 1.58 | 0 |
| Uruguay    | Male   | 15-49 years      | 1.33 | 1.3  | 1.36 | 0 |

|                       |        |                  |      |      |      |       |
|-----------------------|--------|------------------|------|------|------|-------|
| Uruguay               | Male   | 50-69 years      | 1.13 | 1.1  | 1.15 | 0     |
| Uruguay               | Male   | 70+ years        | 0.84 | 0.81 | 0.88 | 0     |
| Uruguay               | Male   | Age-standardized | 1.18 | 1.14 | 1.21 | 0     |
| Uruguay               | Female | All Ages         | 1.73 | 1.64 | 1.81 | 0     |
| Uruguay               | Female | 15-49 years      | 1.39 | 1.33 | 1.46 | 0     |
| Uruguay               | Female | 50-69 years      | 1.24 | 1.19 | 1.3  | 0     |
| Uruguay               | Female | 70+ years        | 1.11 | 1.04 | 1.18 | 0     |
| Uruguay               | Female | Age-standardized | 1.27 | 1.21 | 1.34 | 0     |
| Uruguay               | Both   | All Ages         | 1.61 | 1.54 | 1.67 | 0     |
| Uruguay               | Both   | 15-49 years      | 1.35 | 1.31 | 1.39 | 0     |
| Uruguay               | Both   | 50-69 years      | 1.18 | 1.14 | 1.22 | 0     |
| Uruguay               | Both   | 70+ years        | 0.98 | 0.93 | 1.03 | 0     |
| Serbia                | Both   | Age-standardized | 0.66 | 0.59 | 0.73 | 0     |
| Tajikistan            | Male   | All Ages         | 1.36 | 1.2  | 1.52 | 0     |
| Tajikistan            | Male   | 15-49 years      | 0.82 | 0.7  | 0.94 | 0     |
| Tajikistan            | Male   | 50-69 years      | 0.14 | 0.03 | 0.24 | 0.013 |
| Tajikistan            | Male   | 70+ years        | 0.75 | 0.73 | 0.77 | 0     |
| Tajikistan            | Male   | Age-standardized | 0.56 | 0.48 | 0.65 | 0     |
| Tajikistan            | Female | All Ages         | 1.3  | 1.1  | 1.49 | 0     |
| Tajikistan            | Female | 15-49 years      | 0.86 | 0.77 | 0.95 | 0     |
| Tajikistan            | Female | 50-69 years      | 0.29 | 0.19 | 0.4  | 0     |
| Tajikistan            | Female | 70+ years        | 1.02 | 0.92 | 1.12 | 0     |
| Tajikistan            | Female | Age-standardized | 0.75 | 0.66 | 0.84 | 0     |
| Tajikistan            | Both   | All Ages         | 1.34 | 1.17 | 1.52 | 0     |
| Tajikistan            | Both   | 15-49 years      | 0.84 | 0.74 | 0.95 | 0     |
| Tajikistan            | Both   | 50-69 years      | 0.21 | 0.1  | 0.32 | 0.001 |
| Tajikistan            | Both   | 70+ years        | 1.03 | 0.98 | 1.08 | 0     |
| Cameroon              | Both   | Age-standardized | 0.66 | 0.63 | 0.68 | 0     |
| Sao Tome and Principe | Male   | All Ages         | 1.58 | 1.49 | 1.67 | 0     |
| Sao Tome and Principe | Male   | 15-49 years      | 1.29 | 1.23 | 1.34 | 0     |
| Sao Tome and Principe | Male   | 50-69 years      | 0.74 | 0.71 | 0.78 | 0     |
| Sao Tome and Principe | Male   | 70+ years        | 0.82 | 0.78 | 0.87 | 0     |
| Sao Tome and Principe | Male   | Age-standardized | 0.85 | 0.81 | 0.88 | 0     |
| Sao Tome and Principe | Female | All Ages         | 1.12 | 1.1  | 1.14 | 0     |
| Sao Tome and Principe | Female | 15-49 years      | 0.88 | 0.85 | 0.91 | 0     |
| Sao Tome and Principe | Female | 50-69 years      | 0.48 | 0.42 | 0.53 | 0     |
| Sao Tome and Principe | Female | 70+ years        | 0.76 | 0.7  | 0.83 | 0     |
| Sao Tome and Principe | Female | Age-standardized | 0.59 | 0.54 | 0.65 | 0     |
| Sao Tome and Principe | Both   | All Ages         | 1.41 | 1.35 | 1.48 | 0     |
| Sao Tome and Principe | Both   | 15-49 years      | 1.17 | 1.13 | 1.21 | 0     |
| Sao Tome and Principe | Both   | 50-69 years      | 0.63 | 0.61 | 0.66 | 0     |
| Sao Tome and Principe | Both   | 70+ years        | 0.78 | 0.71 | 0.85 | 0     |
| The Bahamas           | Both   | Age-standardized | 0.66 | 0.6  | 0.73 | 0     |
| Norway                | Male   | All Ages         | 1.17 | 1.07 | 1.27 | 0     |
| Norway                | Male   | 15-49 years      | 1.08 | 0.92 | 1.24 | 0     |
| Norway                | Male   | 50-69 years      | 0.95 | 0.85 | 1.05 | 0     |
| Norway                | Male   | 70+ years        | 0.64 | 0.55 | 0.73 | 0     |
| Norway                | Male   | Age-standardized | 0.97 | 0.86 | 1.09 | 0     |
| Norway                | Female | All Ages         | 1.32 | 1.19 | 1.44 | 0     |
| Norway                | Female | 15-49 years      | 1.33 | 1.16 | 1.5  | 0     |
| Norway                | Female | 50-69 years      | 1.25 | 1.13 | 1.36 | 0     |
| Norway                | Female | 70+ years        | 1.04 | 0.9  | 1.18 | 0     |
| Norway                | Female | Age-standardized | 1.26 | 1.12 | 1.39 | 0     |
| Norway                | Both   | All Ages         | 1.24 | 1.14 | 1.35 | 0     |
| Norway                | Both   | 15-49 years      | 1.16 | 1    | 1.31 | 0     |
| Norway                | Both   | 50-69 years      | 1.1  | 0.99 | 1.22 | 0     |

|                                  |        |                  |      |      |      |       |
|----------------------------------|--------|------------------|------|------|------|-------|
| Norway                           | Both   | 70+ years        | 0.92 | 0.82 | 1.01 | 0     |
| Zimbabwe                         | Both   | Age-standardized | 0.66 | 0.62 | 0.7  | 0     |
| Kuwait                           | Male   | All Ages         | 1.67 | 1.64 | 1.7  | 0     |
| Kuwait                           | Male   | 15-49 years      | 1.27 | 1.25 | 1.3  | 0     |
| Kuwait                           | Male   | 50-69 years      | 0.85 | 0.84 | 0.86 | 0     |
| Kuwait                           | Male   | 70+ years        | 0.63 | 0.6  | 0.67 | 0     |
| Kuwait                           | Male   | Age-standardized | 0.95 | 0.94 | 0.97 | 0     |
| Kuwait                           | Female | All Ages         | 2.42 | 2.36 | 2.47 | 0     |
| Kuwait                           | Female | 15-49 years      | 1.69 | 1.64 | 1.73 | 0     |
| Kuwait                           | Female | 50-69 years      | 1.13 | 1.08 | 1.19 | 0     |
| Kuwait                           | Female | 70+ years        | 1    | 0.93 | 1.07 | 0     |
| Kuwait                           | Female | Age-standardized | 1.18 | 1.13 | 1.23 | 0     |
| Kuwait                           | Both   | All Ages         | 1.86 | 1.81 | 1.9  | 0     |
| Kuwait                           | Both   | 15-49 years      | 1.32 | 1.29 | 1.36 | 0     |
| Kuwait                           | Both   | 50-69 years      | 0.86 | 0.84 | 0.88 | 0     |
| Kuwait                           | Both   | 70+ years        | 0.81 | 0.74 | 0.88 | 0     |
| Timor-Leste                      | Both   | Age-standardized | 0.65 | 0.62 | 0.68 | 0     |
| Turkey                           | Male   | All Ages         | 2.17 | 2.09 | 2.24 | 0     |
| Turkey                           | Male   | 15-49 years      | 1.44 | 1.36 | 1.52 | 0     |
| Turkey                           | Male   | 50-69 years      | 0.95 | 0.89 | 1.01 | 0     |
| Turkey                           | Male   | 70+ years        | 0.82 | 0.74 | 0.9  | 0     |
| Turkey                           | Male   | Age-standardized | 1    | 0.93 | 1.06 | 0     |
| Turkey                           | Female | All Ages         | 2.24 | 2.15 | 2.33 | 0     |
| Turkey                           | Female | 15-49 years      | 1.49 | 1.4  | 1.57 | 0     |
| Turkey                           | Female | 50-69 years      | 1.01 | 0.95 | 1.07 | 0     |
| Turkey                           | Female | 70+ years        | 0.87 | 0.77 | 0.98 | 0     |
| Turkey                           | Female | Age-standardized | 1.02 | 0.96 | 1.09 | 0     |
| Turkey                           | Both   | All Ages         | 2.18 | 2.1  | 2.27 | 0     |
| Turkey                           | Both   | 15-49 years      | 1.46 | 1.38 | 1.54 | 0     |
| Turkey                           | Both   | 50-69 years      | 0.98 | 0.93 | 1.04 | 0     |
| Turkey                           | Both   | 70+ years        | 0.79 | 0.7  | 0.88 | 0     |
| Japan                            | Both   | Age-standardized | 0.64 | 0.6  | 0.68 | 0     |
| Russian Federation               | Male   | All Ages         | 1.08 | 1.06 | 1.1  | 0     |
| Russian Federation               | Male   | 15-49 years      | 0.73 | 0.59 | 0.87 | 0     |
| Russian Federation               | Male   | 50-69 years      | 0.14 | 0.02 | 0.27 | 0.024 |
| Russian Federation               | Male   | 70+ years        | 0.26 | 0.23 | 0.29 | 0     |
| Russian Federation               | Male   | Age-standardized | 0.44 | 0.35 | 0.52 | 0     |
| Russian Federation               | Female | All Ages         | 1.62 | 1.55 | 1.69 | 0     |
| Russian Federation               | Female | 15-49 years      | 1.21 | 1.1  | 1.32 | 0     |
| Russian Federation               | Female | 50-69 years      | 0.73 | 0.61 | 0.85 | 0     |
| Russian Federation               | Female | 70+ years        | 1.22 | 1.12 | 1.32 | 0     |
| Russian Federation               | Female | Age-standardized | 1.08 | 0.98 | 1.18 | 0     |
| Russian Federation               | Both   | All Ages         | 1.28 | 1.24 | 1.32 | 0     |
| Russian Federation               | Both   | 15-49 years      | 0.85 | 0.72 | 0.99 | 0     |
| Russian Federation               | Both   | 50-69 years      | 0.42 | 0.3  | 0.53 | 0     |
| Russian Federation               | Both   | 70+ years        | 1    | 0.94 | 1.06 | 0     |
| Congo                            | Both   | Age-standardized | 0.64 | 0.61 | 0.67 | 0     |
| Democratic Republic of the Congo | Male   | All Ages         | 0.44 | 0.35 | 0.54 | 0     |
| Democratic Republic of the Congo | Male   | 15-49 years      | 0.3  | 0.24 | 0.36 | 0     |
| Democratic Republic of the Congo | Male   | 50-69 years      | 0.15 | 0.08 | 0.22 | 0     |
| Democratic Republic of the Congo | Male   | 70+ years        | 0.18 | 0.11 | 0.25 | 0     |
| Democratic Republic of the Congo | Male   | Age-standardized | 0.21 | 0.14 | 0.27 | 0     |
| Democratic Republic of the Congo | Female | All Ages         | 0.45 | 0.33 | 0.56 | 0     |
| Democratic Republic of the Congo | Female | 15-49 years      | 0.34 | 0.24 | 0.44 | 0     |
| Democratic Republic of the Congo | Female | 50-69 years      | 0.29 | 0.18 | 0.4  | 0     |
| Democratic Republic of the Congo | Female | 70+ years        | 0.44 | 0.34 | 0.55 | 0     |

|                                    |                  |                  |      |      |       |   |
|------------------------------------|------------------|------------------|------|------|-------|---|
| Democratic Republic of the (Female | Age-standardized | 0.36             | 0.25 | 0.46 | 0     |   |
| Democratic Republic of the (Both   | All Ages         | 0.46             | 0.35 | 0.56 | 0     |   |
| Democratic Republic of the (Both   | 15-49 years      | 0.34             | 0.26 | 0.41 | 0     |   |
| Democratic Republic of the (Both   | 50-69 years      | 0.26             | 0.16 | 0.35 | 0     |   |
| Democratic Republic of the (Both   | 70+ years        | 0.15             | 0.04 | 0.26 | 0.008 |   |
| Belarus                            | Both             | Age-standardized | 0.61 | 0.51 | 0.72  | 0 |
| Croatia                            | Male             | All Ages         | 1.28 | 1.17 | 1.38  | 0 |
| Croatia                            | Male             | 15-49 years      | 0.84 | 0.77 | 0.9   | 0 |
| Croatia                            | Male             | 50-69 years      | 0.31 | 0.2  | 0.43  | 0 |
| Croatia                            | Male             | 70+ years        | 0.54 | 0.38 | 0.69  | 0 |
| Croatia                            | Male             | Age-standardized | 0.57 | 0.5  | 0.64  | 0 |
| Croatia                            | Female           | All Ages         | 1.79 | 1.66 | 1.91  | 0 |
| Croatia                            | Female           | 15-49 years      | 1.09 | 1    | 1.19  | 0 |
| Croatia                            | Female           | 50-69 years      | 0.97 | 0.86 | 1.08  | 0 |
| Croatia                            | Female           | 70+ years        | 1.21 | 1.07 | 1.35  | 0 |
| Croatia                            | Female           | Age-standardized | 1.04 | 0.96 | 1.13  | 0 |
| Croatia                            | Both             | All Ages         | 1.5  | 1.39 | 1.61  | 0 |
| Croatia                            | Both             | 15-49 years      | 0.93 | 0.86 | 1     | 0 |
| Croatia                            | Both             | 50-69 years      | 0.63 | 0.52 | 0.75  | 0 |
| Croatia                            | Both             | 70+ years        | 0.98 | 0.83 | 1.13  | 0 |
| Rwanda                             | Both             | Age-standardized | 0.59 | 0.46 | 0.73  | 0 |
| Angola                             | Male             | All Ages         | 1.17 | 1.08 | 1.26  | 0 |
| Angola                             | Male             | 15-49 years      | 1.44 | 1.36 | 1.51  | 0 |
| Angola                             | Male             | 50-69 years      | 1.32 | 1.25 | 1.4   | 0 |
| Angola                             | Male             | 70+ years        | 1.3  | 1.24 | 1.37  | 0 |
| Angola                             | Male             | Age-standardized | 1.38 | 1.3  | 1.46  | 0 |
| Angola                             | Female           | All Ages         | 1.18 | 1.05 | 1.31  | 0 |
| Angola                             | Female           | 15-49 years      | 1.17 | 1.06 | 1.28  | 0 |
| Angola                             | Female           | 50-69 years      | 1.04 | 0.93 | 1.15  | 0 |
| Angola                             | Female           | 70+ years        | 1.22 | 1.11 | 1.33  | 0 |
| Angola                             | Female           | Age-standardized | 1.12 | 1.01 | 1.23  | 0 |
| Angola                             | Both             | All Ages         | 1.14 | 1.03 | 1.25  | 0 |
| Angola                             | Both             | 15-49 years      | 1.28 | 1.18 | 1.37  | 0 |
| Angola                             | Both             | 50-69 years      | 1.14 | 1.05 | 1.23  | 0 |
| Angola                             | Both             | 70+ years        | 1.15 | 1.08 | 1.23  | 0 |
| Iraq                               | Both             | Age-standardized | 0.59 | 0.54 | 0.64  | 0 |
| Malawi                             | Male             | All Ages         | 0.8  | 0.73 | 0.87  | 0 |
| Malawi                             | Male             | 15-49 years      | 0.84 | 0.79 | 0.89  | 0 |
| Malawi                             | Male             | 50-69 years      | 0.75 | 0.7  | 0.79  | 0 |
| Malawi                             | Male             | 70+ years        | 0.77 | 0.73 | 0.82  | 0 |
| Malawi                             | Male             | Age-standardized | 0.79 | 0.75 | 0.84  | 0 |
| Malawi                             | Female           | All Ages         | 0.5  | 0.41 | 0.58  | 0 |
| Malawi                             | Female           | 15-49 years      | 0.41 | 0.37 | 0.45  | 0 |
| Malawi                             | Female           | 50-69 years      | 0.31 | 0.29 | 0.34  | 0 |
| Malawi                             | Female           | 70+ years        | 0.43 | 0.4  | 0.46  | 0 |
| Malawi                             | Female           | Age-standardized | 0.39 | 0.36 | 0.41  | 0 |
| Malawi                             | Both             | All Ages         | 0.66 | 0.59 | 0.74  | 0 |
| Malawi                             | Both             | 15-49 years      | 0.66 | 0.62 | 0.7   | 0 |
| Malawi                             | Both             | 50-69 years      | 0.51 | 0.48 | 0.54  | 0 |
| Malawi                             | Both             | 70+ years        | 0.46 | 0.42 | 0.49  | 0 |
| Guinea                             | Both             | Age-standardized | 0.58 | 0.52 | 0.63  | 0 |
| Germany                            | Male             | All Ages         | 1.87 | 1.71 | 2.02  | 0 |
| Germany                            | Male             | 15-49 years      | 1.53 | 1.36 | 1.7   | 0 |
| Germany                            | Male             | 50-69 years      | 1.39 | 1.25 | 1.53  | 0 |
| Germany                            | Male             | 70+ years        | 1.14 | 1.02 | 1.25  | 0 |
| Germany                            | Male             | Age-standardized | 1.39 | 1.27 | 1.51  | 0 |

|                              |        |                  |      |      |      |   |
|------------------------------|--------|------------------|------|------|------|---|
| Germany                      | Female | All Ages         | 1.81 | 1.7  | 1.91 | 0 |
| Germany                      | Female | 15-49 years      | 1.52 | 1.4  | 1.64 | 0 |
| Germany                      | Female | 50-69 years      | 1.4  | 1.28 | 1.52 | 0 |
| Germany                      | Female | 70+ years        | 1.31 | 1.2  | 1.41 | 0 |
| Germany                      | Female | Age-standardized | 1.41 | 1.31 | 1.5  | 0 |
| Germany                      | Both   | All Ages         | 1.87 | 1.73 | 2.01 | 0 |
| Germany                      | Both   | 15-49 years      | 1.5  | 1.35 | 1.66 | 0 |
| Germany                      | Both   | 50-69 years      | 1.44 | 1.29 | 1.58 | 0 |
| Germany                      | Both   | 70+ years        | 1.6  | 1.48 | 1.72 | 0 |
| Malawi                       | Both   | Age-standardized | 0.58 | 0.55 | 0.62 | 0 |
| Federated States of Microne: | Male   | All Ages         | 2.16 | 2.07 | 2.25 | 0 |
| Federated States of Microne: | Male   | 15-49 years      | 1.29 | 1.15 | 1.43 | 0 |
| Federated States of Microne: | Male   | 50-69 years      | 0.96 | 0.83 | 1.09 | 0 |
| Federated States of Microne: | Male   | 70+ years        | 0.83 | 0.7  | 0.95 | 0 |
| Federated States of Microne: | Male   | Age-standardized | 1.06 | 0.92 | 1.2  | 0 |
| Federated States of Microne: | Female | All Ages         | 2.4  | 2.27 | 2.53 | 0 |
| Federated States of Microne: | Female | 15-49 years      | 1.54 | 1.37 | 1.72 | 0 |
| Federated States of Microne: | Female | 50-69 years      | 1.26 | 1.14 | 1.38 | 0 |
| Federated States of Microne: | Female | 70+ years        | 1.07 | 0.92 | 1.23 | 0 |
| Federated States of Microne: | Female | Age-standardized | 1.28 | 1.13 | 1.43 | 0 |
| Federated States of Microne: | Both   | All Ages         | 2.26 | 2.16 | 2.37 | 0 |
| Federated States of Microne: | Both   | 15-49 years      | 1.4  | 1.25 | 1.55 | 0 |
| Federated States of Microne: | Both   | 50-69 years      | 1.1  | 0.98 | 1.22 | 0 |
| Federated States of Microne: | Both   | 70+ years        | 0.9  | 0.76 | 1.03 | 0 |
| Kyrgyzstan                   | Both   | Age-standardized | 0.57 | 0.48 | 0.66 | 0 |
| Guam                         | Male   | All Ages         | 1.64 | 1.55 | 1.74 | 0 |
| Guam                         | Male   | 15-49 years      | 1.15 | 1.13 | 1.17 | 0 |
| Guam                         | Male   | 50-69 years      | 0.88 | 0.8  | 0.96 | 0 |
| Guam                         | Male   | 70+ years        | 0.72 | 0.67 | 0.78 | 0 |
| Guam                         | Male   | Age-standardized | 0.98 | 0.91 | 1.05 | 0 |
| Guam                         | Female | All Ages         | 2.22 | 2.13 | 2.32 | 0 |
| Guam                         | Female | 15-49 years      | 1.43 | 1.38 | 1.49 | 0 |
| Guam                         | Female | 50-69 years      | 1.42 | 1.32 | 1.51 | 0 |
| Guam                         | Female | 70+ years        | 1.08 | 1    | 1.16 | 0 |
| Guam                         | Female | Age-standardized | 1.33 | 1.22 | 1.43 | 0 |
| Guam                         | Both   | All Ages         | 1.87 | 1.77 | 1.97 | 0 |
| Guam                         | Both   | 15-49 years      | 1.24 | 1.2  | 1.28 | 0 |
| Guam                         | Both   | 50-69 years      | 1.11 | 1.01 | 1.2  | 0 |
| Guam                         | Both   | 70+ years        | 0.89 | 0.84 | 0.95 | 0 |
| The Gambia                   | Both   | Age-standardized | 0.55 | 0.53 | 0.58 | 0 |
| Jordan                       | Male   | All Ages         | 2.13 | 2.08 | 2.18 | 0 |
| Jordan                       | Male   | 15-49 years      | 1.67 | 1.64 | 1.71 | 0 |
| Jordan                       | Male   | 50-69 years      | 1.01 | 0.99 | 1.03 | 0 |
| Jordan                       | Male   | 70+ years        | 0.92 | 0.88 | 0.96 | 0 |
| Jordan                       | Male   | Age-standardized | 1.09 | 1.07 | 1.11 | 0 |
| Jordan                       | Female | All Ages         | 2.3  | 2.25 | 2.35 | 0 |
| Jordan                       | Female | 15-49 years      | 1.8  | 1.75 | 1.85 | 0 |
| Jordan                       | Female | 50-69 years      | 1.27 | 1.23 | 1.31 | 0 |
| Jordan                       | Female | 70+ years        | 1.19 | 1.14 | 1.23 | 0 |
| Jordan                       | Female | Age-standardized | 1.28 | 1.24 | 1.32 | 0 |
| Jordan                       | Both   | All Ages         | 2.21 | 2.17 | 2.25 | 0 |
| Jordan                       | Both   | 15-49 years      | 1.74 | 1.72 | 1.76 | 0 |
| Jordan                       | Both   | 50-69 years      | 1.09 | 1.08 | 1.1  | 0 |
| Jordan                       | Both   | 70+ years        | 1.1  | 1.04 | 1.17 | 0 |
| Northern Mariana Islands     | Both   | Age-standardized | 0.54 | 0.49 | 0.59 | 0 |
| High SDI                     | Male   | All Ages         | 1.61 | 1.51 | 1.7  | 0 |



|                          |        |                  |      |      |      |   |
|--------------------------|--------|------------------|------|------|------|---|
| High SDI                 | Male   | 15-49 years      | 1.29 | 1.19 | 1.39 | 0 |
| High SDI                 | Male   | 50-69 years      | 1.06 | 1    | 1.12 | 0 |
| High SDI                 | Male   | 70+ years        | 0.71 | 0.63 | 0.79 | 0 |
| High SDI                 | Male   | Age-standardized | 1.1  | 1.02 | 1.18 | 0 |
| High SDI                 | Female | All Ages         | 1.62 | 1.54 | 1.71 | 0 |
| High SDI                 | Female | 15-49 years      | 1.33 | 1.23 | 1.42 | 0 |
| High SDI                 | Female | 50-69 years      | 1.13 | 1.1  | 1.16 | 0 |
| High SDI                 | Female | 70+ years        | 0.8  | 0.7  | 0.9  | 0 |
| High SDI                 | Female | Age-standardized | 1.15 | 1.08 | 1.22 | 0 |
| High SDI                 | Both   | All Ages         | 1.62 | 1.53 | 1.71 | 0 |
| High SDI                 | Both   | 15-49 years      | 1.3  | 1.2  | 1.4  | 0 |
| High SDI                 | Both   | 50-69 years      | 1.11 | 1.06 | 1.16 | 0 |
| High SDI                 | Both   | 70+ years        | 0.83 | 0.74 | 0.92 | 0 |
| High SDI                 | Both   | Age-standardized | 1.14 | 1.06 | 1.21 | 0 |
| Zimbabwe                 | Male   | All Ages         | 0.7  | 0.62 | 0.79 | 0 |
| Zimbabwe                 | Male   | 15-49 years      | 0.63 | 0.56 | 0.69 | 0 |
| Zimbabwe                 | Male   | 50-69 years      | 0.3  | 0.25 | 0.35 | 0 |
| Zimbabwe                 | Male   | 70+ years        | 0.26 | 0.21 | 0.31 | 0 |
| Zimbabwe                 | Male   | Age-standardized | 0.36 | 0.3  | 0.41 | 0 |
| Zimbabwe                 | Female | All Ages         | 1.65 | 1.6  | 1.69 | 0 |
| Zimbabwe                 | Female | 15-49 years      | 1.3  | 1.21 | 1.39 | 0 |
| Zimbabwe                 | Female | 50-69 years      | 1.04 | 0.97 | 1.11 | 0 |
| Zimbabwe                 | Female | 70+ years        | 1.19 | 1.13 | 1.26 | 0 |
| Zimbabwe                 | Female | Age-standardized | 1.09 | 1.04 | 1.15 | 0 |
| Zimbabwe                 | Both   | All Ages         | 1.12 | 1.06 | 1.18 | 0 |
| Zimbabwe                 | Both   | 15-49 years      | 0.92 | 0.85 | 0.99 | 0 |
| Zimbabwe                 | Both   | 50-69 years      | 0.55 | 0.49 | 0.6  | 0 |
| Zimbabwe                 | Both   | 70+ years        | 0.67 | 0.63 | 0.71 | 0 |
| Sierra Leone             | Both   | Age-standardized | 0.52 | 0.49 | 0.55 | 0 |
| Uzbekistan               | Male   | All Ages         | 2.15 | 2.02 | 2.29 | 0 |
| Uzbekistan               | Male   | 15-49 years      | 1.44 | 1.3  | 1.57 | 0 |
| Uzbekistan               | Male   | 50-69 years      | 0.69 | 0.62 | 0.77 | 0 |
| Uzbekistan               | Male   | 70+ years        | 1.41 | 1.36 | 1.45 | 0 |
| Uzbekistan               | Male   | Age-standardized | 1.1  | 0.98 | 1.22 | 0 |
| Uzbekistan               | Female | All Ages         | 2.21 | 2.02 | 2.4  | 0 |
| Uzbekistan               | Female | 15-49 years      | 1.54 | 1.4  | 1.67 | 0 |
| Uzbekistan               | Female | 50-69 years      | 0.92 | 0.83 | 1.01 | 0 |
| Uzbekistan               | Female | 70+ years        | 1.62 | 1.48 | 1.75 | 0 |
| Uzbekistan               | Female | Age-standardized | 1.31 | 1.17 | 1.46 | 0 |
| Uzbekistan               | Both   | All Ages         | 2.18 | 2.02 | 2.34 | 0 |
| Uzbekistan               | Both   | 15-49 years      | 1.48 | 1.35 | 1.62 | 0 |
| Uzbekistan               | Both   | 50-69 years      | 0.8  | 0.72 | 0.87 | 0 |
| Uzbekistan               | Both   | 70+ years        | 1.62 | 1.54 | 1.7  | 0 |
| Central African Republic | Both   | Age-standardized | 0.49 | 0.45 | 0.53 | 0 |
| Suriname                 | Male   | All Ages         | 2.11 | 2.03 | 2.19 | 0 |
| Suriname                 | Male   | 15-49 years      | 1.78 | 1.72 | 1.83 | 0 |
| Suriname                 | Male   | 50-69 years      | 1.2  | 1.14 | 1.27 | 0 |
| Suriname                 | Male   | 70+ years        | 1.06 | 1    | 1.13 | 0 |
| Suriname                 | Male   | Age-standardized | 1.29 | 1.21 | 1.36 | 0 |
| Suriname                 | Female | All Ages         | 2.2  | 2.15 | 2.25 | 0 |
| Suriname                 | Female | 15-49 years      | 1.62 | 1.57 | 1.66 | 0 |
| Suriname                 | Female | 50-69 years      | 1.17 | 1.14 | 1.2  | 0 |
| Suriname                 | Female | 70+ years        | 1.16 | 1.13 | 1.2  | 0 |
| Suriname                 | Female | Age-standardized | 1.2  | 1.17 | 1.24 | 0 |
| Suriname                 | Both   | All Ages         | 2.13 | 2.07 | 2.2  | 0 |
| Suriname                 | Both   | 15-49 years      | 1.69 | 1.64 | 1.74 | 0 |

|                   |        |                  |      |       |      |       |
|-------------------|--------|------------------|------|-------|------|-------|
| Suriname          | Both   | 50-69 years      | 1.18 | 1.13  | 1.23 | 0     |
| Suriname          | Both   | 70+ years        | 1.06 | 1.02  | 1.09 | 0     |
| Uganda            | Both   | Age-standardized | 0.49 | 0.45  | 0.53 | 0     |
| Afghanistan       | Male   | All Ages         | 0.08 | -0.26 | 0.42 | 0.636 |
| Afghanistan       | Male   | 15-49 years      | 1.22 | 1.08  | 1.36 | 0     |
| Afghanistan       | Male   | 50-69 years      | 0.85 | 0.75  | 0.96 | 0     |
| Afghanistan       | Male   | 70+ years        | 0.68 | 0.6   | 0.77 | 0     |
| Afghanistan       | Male   | Age-standardized | 0.82 | 0.71  | 0.92 | 0     |
| Afghanistan       | Female | All Ages         | 0.47 | 0.22  | 0.72 | 0.001 |
| Afghanistan       | Female | 15-49 years      | 1.4  | 1.27  | 1.54 | 0     |
| Afghanistan       | Female | 50-69 years      | 1.09 | 1.03  | 1.14 | 0     |
| Afghanistan       | Female | 70+ years        | 1    | 0.94  | 1.06 | 0     |
| Afghanistan       | Female | Age-standardized | 1.07 | 1     | 1.14 | 0     |
| Afghanistan       | Both   | All Ages         | 0.23 | -0.07 | 0.54 | 0.126 |
| Afghanistan       | Both   | 15-49 years      | 1.32 | 1.19  | 1.45 | 0     |
| Afghanistan       | Both   | 50-69 years      | 0.83 | 0.73  | 0.93 | 0     |
| Afghanistan       | Both   | 70+ years        | 0.7  | 0.63  | 0.77 | 0     |
| Senegal           | Both   | Age-standardized | 0.49 | 0.4   | 0.57 | 0     |
| Brazil            | Male   | All Ages         | 2.32 | 2.3   | 2.34 | 0     |
| Brazil            | Male   | 15-49 years      | 1.52 | 1.5   | 1.54 | 0     |
| Brazil            | Male   | 50-69 years      | 1.12 | 1.09  | 1.14 | 0     |
| Brazil            | Male   | 70+ years        | 0.87 | 0.84  | 0.9  | 0     |
| Brazil            | Male   | Age-standardized | 1.14 | 1.12  | 1.17 | 0     |
| Brazil            | Female | All Ages         | 2.54 | 2.51  | 2.56 | 0     |
| Brazil            | Female | 15-49 years      | 1.63 | 1.61  | 1.65 | 0     |
| Brazil            | Female | 50-69 years      | 1.22 | 1.17  | 1.27 | 0     |
| Brazil            | Female | 70+ years        | 1.06 | 1.03  | 1.1  | 0     |
| Brazil            | Female | Age-standardized | 1.23 | 1.19  | 1.26 | 0     |
| Brazil            | Both   | All Ages         | 2.41 | 2.39  | 2.43 | 0     |
| Brazil            | Both   | 15-49 years      | 1.57 | 1.56  | 1.59 | 0     |
| Brazil            | Both   | 50-69 years      | 1.15 | 1.12  | 1.19 | 0     |
| Brazil            | Both   | 70+ years        | 0.94 | 0.91  | 0.96 | 0     |
| Czech Republic    | Both   | Age-standardized | 0.49 | 0.42  | 0.55 | 0     |
| Thailand          | Male   | All Ages         | 2.85 | 2.81  | 2.9  | 0     |
| Thailand          | Male   | 15-49 years      | 1.96 | 1.88  | 2.04 | 0     |
| Thailand          | Male   | 50-69 years      | 1.38 | 1.34  | 1.42 | 0     |
| Thailand          | Male   | 70+ years        | 1.16 | 1.11  | 1.2  | 0     |
| Thailand          | Male   | Age-standardized | 1.4  | 1.37  | 1.43 | 0     |
| Thailand          | Female | All Ages         | 2.87 | 2.79  | 2.95 | 0     |
| Thailand          | Female | 15-49 years      | 1.93 | 1.82  | 2.04 | 0     |
| Thailand          | Female | 50-69 years      | 1.4  | 1.32  | 1.48 | 0     |
| Thailand          | Female | 70+ years        | 1.26 | 1.19  | 1.33 | 0     |
| Thailand          | Female | Age-standardized | 1.36 | 1.29  | 1.44 | 0     |
| Thailand          | Both   | All Ages         | 2.85 | 2.81  | 2.9  | 0     |
| Thailand          | Both   | 15-49 years      | 1.95 | 1.86  | 2.03 | 0     |
| Thailand          | Both   | 50-69 years      | 1.38 | 1.34  | 1.43 | 0     |
| Thailand          | Both   | 70+ years        | 1.21 | 1.15  | 1.26 | 0     |
| Hungary           | Both   | Age-standardized | 0.48 | 0.45  | 0.52 | 0     |
| Equatorial Guinea | Male   | All Ages         | 1.52 | 1.38  | 1.67 | 0     |
| Equatorial Guinea | Male   | 15-49 years      | 1.4  | 1.3   | 1.5  | 0     |
| Equatorial Guinea | Male   | 50-69 years      | 1.31 | 1.19  | 1.44 | 0     |
| Equatorial Guinea | Male   | 70+ years        | 1.18 | 1.06  | 1.3  | 0     |
| Equatorial Guinea | Male   | Age-standardized | 1.43 | 1.3   | 1.56 | 0     |
| Equatorial Guinea | Female | All Ages         | 1.99 | 1.87  | 2.11 | 0     |
| Equatorial Guinea | Female | 15-49 years      | 1.93 | 1.79  | 2.07 | 0     |
| Equatorial Guinea | Female | 50-69 years      | 1.73 | 1.6   | 1.86 | 0     |

|                   |        |                  |      |       |      |       |
|-------------------|--------|------------------|------|-------|------|-------|
| Equatorial Guinea | Female | 70+ years        | 1.84 | 1.7   | 1.98 | 0     |
| Equatorial Guinea | Female | Age-standardized | 1.86 | 1.71  | 2    | 0     |
| Equatorial Guinea | Both   | All Ages         | 1.78 | 1.66  | 1.91 | 0     |
| Equatorial Guinea | Both   | 15-49 years      | 1.76 | 1.64  | 1.87 | 0     |
| Equatorial Guinea | Both   | 50-69 years      | 1.45 | 1.34  | 1.57 | 0     |
| Equatorial Guinea | Both   | 70+ years        | 1.5  | 1.37  | 1.63 | 0     |
| Kazakhstan        | Both   | Age-standardized | 0.45 | 0.34  | 0.56 | 0     |
| Lebanon           | Male   | All Ages         | 2.03 | 1.98  | 2.07 | 0     |
| Lebanon           | Male   | 15-49 years      | 1.57 | 1.52  | 1.62 | 0     |
| Lebanon           | Male   | 50-69 years      | 1.06 | 1.04  | 1.09 | 0     |
| Lebanon           | Male   | 70+ years        | 0.92 | 0.86  | 0.98 | 0     |
| Lebanon           | Male   | Age-standardized | 1.12 | 1.09  | 1.15 | 0     |
| Lebanon           | Female | All Ages         | 2.02 | 1.96  | 2.08 | 0     |
| Lebanon           | Female | 15-49 years      | 1.54 | 1.49  | 1.59 | 0     |
| Lebanon           | Female | 50-69 years      | 1.18 | 1.13  | 1.22 | 0     |
| Lebanon           | Female | 70+ years        | 1.04 | 0.98  | 1.1  | 0     |
| Lebanon           | Female | Age-standardized | 1.18 | 1.14  | 1.22 | 0     |
| Lebanon           | Both   | All Ages         | 2.03 | 1.98  | 2.08 | 0     |
| Lebanon           | Both   | 15-49 years      | 1.59 | 1.54  | 1.64 | 0     |
| Lebanon           | Both   | 50-69 years      | 1.09 | 1.06  | 1.11 | 0     |
| Lebanon           | Both   | 70+ years        | 0.97 | 0.9   | 1.03 | 0     |
| Swaziland         | Both   | Age-standardized | 0.45 | 0.43  | 0.48 | 0     |
| Nicaragua         | Male   | All Ages         | 3.02 | 2.93  | 3.11 | 0     |
| Nicaragua         | Male   | 15-49 years      | 1.98 | 1.89  | 2.07 | 0     |
| Nicaragua         | Male   | 50-69 years      | 1.49 | 1.43  | 1.55 | 0     |
| Nicaragua         | Male   | 70+ years        | 1.26 | 1.2   | 1.32 | 0     |
| Nicaragua         | Male   | Age-standardized | 1.59 | 1.52  | 1.66 | 0     |
| Nicaragua         | Female | All Ages         | 3.12 | 2.99  | 3.25 | 0     |
| Nicaragua         | Female | 15-49 years      | 2.04 | 1.92  | 2.16 | 0     |
| Nicaragua         | Female | 50-69 years      | 1.59 | 1.49  | 1.69 | 0     |
| Nicaragua         | Female | 70+ years        | 1.47 | 1.38  | 1.56 | 0     |
| Nicaragua         | Female | Age-standardized | 1.64 | 1.53  | 1.74 | 0     |
| Nicaragua         | Both   | All Ages         | 3.07 | 2.96  | 3.17 | 0     |
| Nicaragua         | Both   | 15-49 years      | 2.02 | 1.91  | 2.12 | 0     |
| Nicaragua         | Both   | 50-69 years      | 1.52 | 1.45  | 1.6  | 0     |
| Nicaragua         | Both   | 70+ years        | 1.35 | 1.28  | 1.42 | 0     |
| Mozambique        | Both   | Age-standardized | 0.45 | 0.4   | 0.49 | 0     |
| Czech Republic    | Male   | All Ages         | 1.07 | 1.04  | 1.1  | 0     |
| Czech Republic    | Male   | 15-49 years      | 0.74 | 0.63  | 0.85 | 0     |
| Czech Republic    | Male   | 50-69 years      | 0.1  | -0.03 | 0.22 | 0.127 |
| Czech Republic    | Male   | 70+ years        | 0.14 | 0.12  | 0.17 | 0     |
| Czech Republic    | Male   | Age-standardized | 0.29 | 0.24  | 0.34 | 0     |
| Czech Republic    | Female | All Ages         | 1.39 | 1.32  | 1.47 | 0     |
| Czech Republic    | Female | 15-49 years      | 0.87 | 0.76  | 0.98 | 0     |
| Czech Republic    | Female | 50-69 years      | 0.69 | 0.48  | 0.91 | 0     |
| Czech Republic    | Female | 70+ years        | 0.64 | 0.56  | 0.72 | 0     |
| Czech Republic    | Female | Age-standardized | 0.66 | 0.58  | 0.73 | 0     |
| Czech Republic    | Both   | All Ages         | 1.21 | 1.16  | 1.25 | 0     |
| Czech Republic    | Both   | 15-49 years      | 0.81 | 0.7   | 0.92 | 0     |
| Czech Republic    | Both   | 50-69 years      | 0.39 | 0.23  | 0.54 | 0     |
| Czech Republic    | Both   | 70+ years        | 0.49 | 0.44  | 0.53 | 0     |
| Eritrea           | Both   | Age-standardized | 0.44 | 0.41  | 0.47 | 0     |
| Belize            | Male   | All Ages         | 1.97 | 1.91  | 2.04 | 0     |
| Belize            | Male   | 15-49 years      | 1.32 | 1.21  | 1.43 | 0     |
| Belize            | Male   | 50-69 years      | 0.85 | 0.79  | 0.91 | 0     |
| Belize            | Male   | 70+ years        | 0.67 | 0.6   | 0.74 | 0     |

|                      |        |                  |      |      |      |   |
|----------------------|--------|------------------|------|------|------|---|
| Belize               | Male   | Age-standardized | 0.97 | 0.9  | 1.04 | 0 |
| Belize               | Female | All Ages         | 2.12 | 1.99 | 2.25 | 0 |
| Belize               | Female | 15-49 years      | 1.44 | 1.27 | 1.61 | 0 |
| Belize               | Female | 50-69 years      | 1    | 0.86 | 1.14 | 0 |
| Belize               | Female | 70+ years        | 0.99 | 0.82 | 1.17 | 0 |
| Belize               | Female | Age-standardized | 1.08 | 0.93 | 1.23 | 0 |
| Belize               | Both   | All Ages         | 2.02 | 1.93 | 2.11 | 0 |
| Belize               | Both   | 15-49 years      | 1.35 | 1.22 | 1.48 | 0 |
| Belize               | Both   | 50-69 years      | 0.9  | 0.8  | 1    | 0 |
| Belize               | Both   | 70+ years        | 0.85 | 0.74 | 0.96 | 0 |
| Montenegro           | Both   | Age-standardized | 0.43 | 0.33 | 0.52 | 0 |
| United Arab Emirates | Male   | All Ages         | 2.27 | 2.21 | 2.34 | 0 |
| United Arab Emirates | Male   | 15-49 years      | 1.48 | 1.35 | 1.6  | 0 |
| United Arab Emirates | Male   | 50-69 years      | 1.04 | 1    | 1.07 | 0 |
| United Arab Emirates | Male   | 70+ years        | 0.83 | 0.79 | 0.88 | 0 |
| United Arab Emirates | Male   | Age-standardized | 1.12 | 1.08 | 1.16 | 0 |
| United Arab Emirates | Female | All Ages         | 3.3  | 3.22 | 3.38 | 0 |
| United Arab Emirates | Female | 15-49 years      | 2.02 | 1.9  | 2.15 | 0 |
| United Arab Emirates | Female | 50-69 years      | 1.35 | 1.27 | 1.43 | 0 |
| United Arab Emirates | Female | 70+ years        | 1.13 | 1.04 | 1.22 | 0 |
| United Arab Emirates | Female | Age-standardized | 1.39 | 1.3  | 1.48 | 0 |
| United Arab Emirates | Both   | All Ages         | 2.7  | 2.66 | 2.74 | 0 |
| United Arab Emirates | Both   | 15-49 years      | 1.7  | 1.58 | 1.81 | 0 |
| United Arab Emirates | Both   | 50-69 years      | 1.16 | 1.11 | 1.2  | 0 |
| United Arab Emirates | Both   | 70+ years        | 0.97 | 0.89 | 1.04 | 0 |
| Mongolia             | Both   | Age-standardized | 0.4  | 0.33 | 0.46 | 0 |
| Sierra Leone         | Male   | All Ages         | 0.51 | 0.39 | 0.63 | 0 |
| Sierra Leone         | Male   | 15-49 years      | 0.48 | 0.43 | 0.52 | 0 |
| Sierra Leone         | Male   | 50-69 years      | 0.57 | 0.53 | 0.6  | 0 |
| Sierra Leone         | Male   | 70+ years        | 0.6  | 0.57 | 0.63 | 0 |
| Sierra Leone         | Male   | Age-standardized | 0.62 | 0.6  | 0.65 | 0 |
| Sierra Leone         | Female | All Ages         | 0.21 | 0.13 | 0.29 | 0 |
| Sierra Leone         | Female | 15-49 years      | 0.19 | 0.13 | 0.24 | 0 |
| Sierra Leone         | Female | 50-69 years      | 0.25 | 0.21 | 0.29 | 0 |
| Sierra Leone         | Female | 70+ years        | 0.43 | 0.38 | 0.47 | 0 |
| Sierra Leone         | Female | Age-standardized | 0.32 | 0.28 | 0.36 | 0 |
| Sierra Leone         | Both   | All Ages         | 0.41 | 0.31 | 0.51 | 0 |
| Sierra Leone         | Both   | 15-49 years      | 0.4  | 0.36 | 0.45 | 0 |
| Sierra Leone         | Both   | 50-69 years      | 0.48 | 0.43 | 0.52 | 0 |
| Sierra Leone         | Both   | 70+ years        | 0.42 | 0.39 | 0.46 | 0 |
| Zambia               | Both   | Age-standardized | 0.39 | 0.36 | 0.43 | 0 |
| Mauritius            | Male   | All Ages         | 2.36 | 2.32 | 2.4  | 0 |
| Mauritius            | Male   | 15-49 years      | 1.55 | 1.45 | 1.65 | 0 |
| Mauritius            | Male   | 50-69 years      | 1.12 | 1.08 | 1.16 | 0 |
| Mauritius            | Male   | 70+ years        | 0.85 | 0.79 | 0.91 | 0 |
| Mauritius            | Male   | Age-standardized | 1.19 | 1.14 | 1.24 | 0 |
| Mauritius            | Female | All Ages         | 2.57 | 2.5  | 2.65 | 0 |
| Mauritius            | Female | 15-49 years      | 1.66 | 1.52 | 1.8  | 0 |
| Mauritius            | Female | 50-69 years      | 1.35 | 1.28 | 1.42 | 0 |
| Mauritius            | Female | 70+ years        | 1.19 | 1.11 | 1.28 | 0 |
| Mauritius            | Female | Age-standardized | 1.35 | 1.26 | 1.43 | 0 |
| Mauritius            | Both   | All Ages         | 2.46 | 2.4  | 2.51 | 0 |
| Mauritius            | Both   | 15-49 years      | 1.6  | 1.48 | 1.71 | 0 |
| Mauritius            | Both   | 50-69 years      | 1.24 | 1.19 | 1.28 | 0 |
| Mauritius            | Both   | 70+ years        | 1.04 | 0.97 | 1.11 | 0 |
| Comoros              | Both   | Age-standardized | 0.39 | 0.37 | 0.42 | 0 |

|             |        |                  |      |      |      |   |
|-------------|--------|------------------|------|------|------|---|
| The Gambia  | Male   | All Ages         | 1.02 | 1    | 1.04 | 0 |
| The Gambia  | Male   | 15-49 years      | 0.76 | 0.72 | 0.8  | 0 |
| The Gambia  | Male   | 50-69 years      | 0.72 | 0.69 | 0.76 | 0 |
| The Gambia  | Male   | 70+ years        | 0.73 | 0.7  | 0.76 | 0 |
| The Gambia  | Male   | Age-standardized | 0.76 | 0.73 | 0.79 | 0 |
| The Gambia  | Female | All Ages         | 0.92 | 0.87 | 0.97 | 0 |
| The Gambia  | Female | 15-49 years      | 0.46 | 0.43 | 0.49 | 0 |
| The Gambia  | Female | 50-69 years      | 0.35 | 0.31 | 0.38 | 0 |
| The Gambia  | Female | 70+ years        | 0.51 | 0.48 | 0.53 | 0 |
| The Gambia  | Female | Age-standardized | 0.41 | 0.38 | 0.44 | 0 |
| The Gambia  | Both   | All Ages         | 0.96 | 0.94 | 0.98 | 0 |
| The Gambia  | Both   | 15-49 years      | 0.62 | 0.6  | 0.65 | 0 |
| The Gambia  | Both   | 50-69 years      | 0.47 | 0.45 | 0.5  | 0 |
| The Gambia  | Both   | 70+ years        | 0.53 | 0.5  | 0.56 | 0 |
| Madagascar  | Both   | Age-standardized | 0.37 | 0.33 | 0.41 | 0 |
| Cuba        | Male   | All Ages         | 2.02 | 1.93 | 2.11 | 0 |
| Cuba        | Male   | 15-49 years      | 1.6  | 1.53 | 1.67 | 0 |
| Cuba        | Male   | 50-69 years      | 1.03 | 0.94 | 1.12 | 0 |
| Cuba        | Male   | 70+ years        | 0.82 | 0.74 | 0.89 | 0 |
| Cuba        | Male   | Age-standardized | 1.08 | 0.99 | 1.18 | 0 |
| Cuba        | Female | All Ages         | 2.1  | 2.03 | 2.16 | 0 |
| Cuba        | Female | 15-49 years      | 1.52 | 1.45 | 1.6  | 0 |
| Cuba        | Female | 50-69 years      | 1.03 | 0.96 | 1.11 | 0 |
| Cuba        | Female | 70+ years        | 0.88 | 0.83 | 0.93 | 0 |
| Cuba        | Female | Age-standardized | 1.02 | 0.96 | 1.08 | 0 |
| Cuba        | Both   | All Ages         | 2.04 | 1.96 | 2.12 | 0 |
| Cuba        | Both   | 15-49 years      | 1.58 | 1.51 | 1.65 | 0 |
| Cuba        | Both   | 50-69 years      | 1.01 | 0.93 | 1.09 | 0 |
| Cuba        | Both   | 70+ years        | 0.81 | 0.75 | 0.88 | 0 |
| South Sudan | Both   | Age-standardized | 0.35 | 0.33 | 0.38 | 0 |
| Timor-Leste | Male   | All Ages         | 0.98 | 0.93 | 1.04 | 0 |
| Timor-Leste | Male   | 15-49 years      | 0.42 | 0.4  | 0.43 | 0 |
| Timor-Leste | Male   | 50-69 years      | 0.62 | 0.59 | 0.66 | 0 |
| Timor-Leste | Male   | 70+ years        | 0.5  | 0.49 | 0.52 | 0 |
| Timor-Leste | Male   | Age-standardized | 0.56 | 0.53 | 0.59 | 0 |
| Timor-Leste | Female | All Ages         | 1.21 | 1.13 | 1.29 | 0 |
| Timor-Leste | Female | 15-49 years      | 0.42 | 0.37 | 0.47 | 0 |
| Timor-Leste | Female | 50-69 years      | 0.92 | 0.89 | 0.95 | 0 |
| Timor-Leste | Female | 70+ years        | 0.81 | 0.79 | 0.83 | 0 |
| Timor-Leste | Female | Age-standardized | 0.8  | 0.77 | 0.83 | 0 |
| Timor-Leste | Both   | All Ages         | 1.07 | 1.01 | 1.14 | 0 |
| Timor-Leste | Both   | 15-49 years      | 0.41 | 0.38 | 0.43 | 0 |
| Timor-Leste | Both   | 50-69 years      | 0.73 | 0.7  | 0.76 | 0 |
| Timor-Leste | Both   | 70+ years        | 0.61 | 0.59 | 0.63 | 0 |
| Nigeria     | Both   | Age-standardized | 0.34 | 0.22 | 0.46 | 0 |
| Bangladesh  | Male   | All Ages         | 2.53 | 2.38 | 2.68 | 0 |
| Bangladesh  | Male   | 15-49 years      | 1.43 | 1.35 | 1.51 | 0 |
| Bangladesh  | Male   | 50-69 years      | 1.13 | 1.04 | 1.21 | 0 |
| Bangladesh  | Male   | 70+ years        | 1.22 | 1.13 | 1.31 | 0 |
| Bangladesh  | Male   | Age-standardized | 1.18 | 1.09 | 1.27 | 0 |
| Bangladesh  | Female | All Ages         | 2.6  | 2.44 | 2.75 | 0 |
| Bangladesh  | Female | 15-49 years      | 1.5  | 1.39 | 1.61 | 0 |
| Bangladesh  | Female | 50-69 years      | 1.04 | 0.94 | 1.15 | 0 |
| Bangladesh  | Female | 70+ years        | 1.29 | 1.18 | 1.4  | 0 |
| Bangladesh  | Female | Age-standardized | 1.1  | 1.01 | 1.2  | 0 |
| Bangladesh  | Both   | All Ages         | 2.52 | 2.37 | 2.66 | 0 |

|                              |        |                  |       |       |       |       |
|------------------------------|--------|------------------|-------|-------|-------|-------|
| Bangladesh                   | Both   | 15-49 years      | 1.4   | 1.32  | 1.49  | 0     |
| Bangladesh                   | Both   | 50-69 years      | 1.05  | 0.97  | 1.13  | 0     |
| Bangladesh                   | Both   | 70+ years        | 1.2   | 1.11  | 1.29  | 0     |
| Burundi                      | Both   | Age-standardized | 0.33  | 0.31  | 0.36  | 0     |
| Hungary                      | Male   | All Ages         | 0.8   | 0.78  | 0.83  | 0     |
| Hungary                      | Male   | 15-49 years      | 0.57  | 0.5   | 0.64  | 0     |
| Hungary                      | Male   | 50-69 years      | -0.02 | -0.09 | 0.05  | 0.554 |
| Hungary                      | Male   | 70+ years        | 0.24  | 0.19  | 0.3   | 0     |
| Hungary                      | Male   | Age-standardized | 0.24  | 0.22  | 0.27  | 0     |
| Hungary                      | Female | All Ages         | 1.47  | 1.44  | 1.51  | 0     |
| Hungary                      | Female | 15-49 years      | 0.8   | 0.73  | 0.87  | 0     |
| Hungary                      | Female | 50-69 years      | 0.85  | 0.77  | 0.93  | 0     |
| Hungary                      | Female | 70+ years        | 0.87  | 0.84  | 0.91  | 0     |
| Hungary                      | Female | Age-standardized | 0.76  | 0.72  | 0.8   | 0     |
| Hungary                      | Both   | All Ages         | 1.09  | 1.06  | 1.13  | 0     |
| Hungary                      | Both   | 15-49 years      | 0.66  | 0.59  | 0.73  | 0     |
| Hungary                      | Both   | 50-69 years      | 0.4   | 0.32  | 0.47  | 0     |
| Hungary                      | Both   | 70+ years        | 0.57  | 0.55  | 0.6   | 0     |
| Slovakia                     | Both   | Age-standardized | 0.3   | 0.22  | 0.38  | 0     |
| Ghana                        | Male   | All Ages         | 1.99  | 1.95  | 2.04  | 0     |
| Ghana                        | Male   | 15-49 years      | 1.6   | 1.56  | 1.65  | 0     |
| Ghana                        | Male   | 50-69 years      | 1.44  | 1.4   | 1.48  | 0     |
| Ghana                        | Male   | 70+ years        | 1.45  | 1.4   | 1.5   | 0     |
| Ghana                        | Male   | Age-standardized | 1.51  | 1.46  | 1.55  | 0     |
| Ghana                        | Female | All Ages         | 1.79  | 1.74  | 1.84  | 0     |
| Ghana                        | Female | 15-49 years      | 1.3   | 1.23  | 1.37  | 0     |
| Ghana                        | Female | 50-69 years      | 1.1   | 1.06  | 1.14  | 0     |
| Ghana                        | Female | 70+ years        | 1.28  | 1.23  | 1.33  | 0     |
| Ghana                        | Female | Age-standardized | 1.19  | 1.14  | 1.24  | 0     |
| Ghana                        | Both   | All Ages         | 1.89  | 1.85  | 1.94  | 0     |
| Ghana                        | Both   | 15-49 years      | 1.47  | 1.41  | 1.52  | 0     |
| Ghana                        | Both   | 50-69 years      | 1.24  | 1.2   | 1.28  | 0     |
| Ghana                        | Both   | 70+ years        | 1.28  | 1.23  | 1.33  | 0     |
| Somalia                      | Both   | Age-standardized | 0.29  | 0.23  | 0.35  | 0     |
| Mozambique                   | Male   | All Ages         | 0.42  | 0.36  | 0.49  | 0     |
| Mozambique                   | Male   | 15-49 years      | 0.74  | 0.65  | 0.82  | 0     |
| Mozambique                   | Male   | 50-69 years      | 0.66  | 0.61  | 0.71  | 0     |
| Mozambique                   | Male   | 70+ years        | 0.7   | 0.65  | 0.75  | 0     |
| Mozambique                   | Male   | Age-standardized | 0.7   | 0.65  | 0.75  | 0     |
| Mozambique                   | Female | All Ages         | -0.11 | -0.19 | -0.03 | 0.009 |
| Mozambique                   | Female | 15-49 years      | 0.11  | 0.03  | 0.19  | 0.013 |
| Mozambique                   | Female | 50-69 years      | 0.07  | 0.03  | 0.11  | 0.001 |
| Mozambique                   | Female | 70+ years        | 0.2   | 0.15  | 0.25  | 0     |
| Mozambique                   | Female | Age-standardized | 0.12  | 0.08  | 0.17  | 0     |
| Mozambique                   | Both   | All Ages         | 0.21  | 0.15  | 0.28  | 0     |
| Mozambique                   | Both   | 15-49 years      | 0.5   | 0.41  | 0.59  | 0     |
| Mozambique                   | Both   | 50-69 years      | 0.38  | 0.34  | 0.43  | 0     |
| Mozambique                   | Both   | 70+ years        | 0.34  | 0.29  | 0.38  | 0     |
| Democratic Republic of the C | Both   | Age-standardized | 0.28  | 0.19  | 0.37  | 0     |
