# Supplementary figures and images for: Prevalence trends in non-alcoholic fatty liver disease at the global, regional and national levels, 1990–2017: a population-based observational study
Source: PubMed Central journal article supplement — BMJ Open. 2020 Aug 3;10(8):e036663. doi: 10.1136/bmjopen-2019-036663 (PMC7402189; doi:10.1136/bmjopen-2019-036663), 2020-08-03

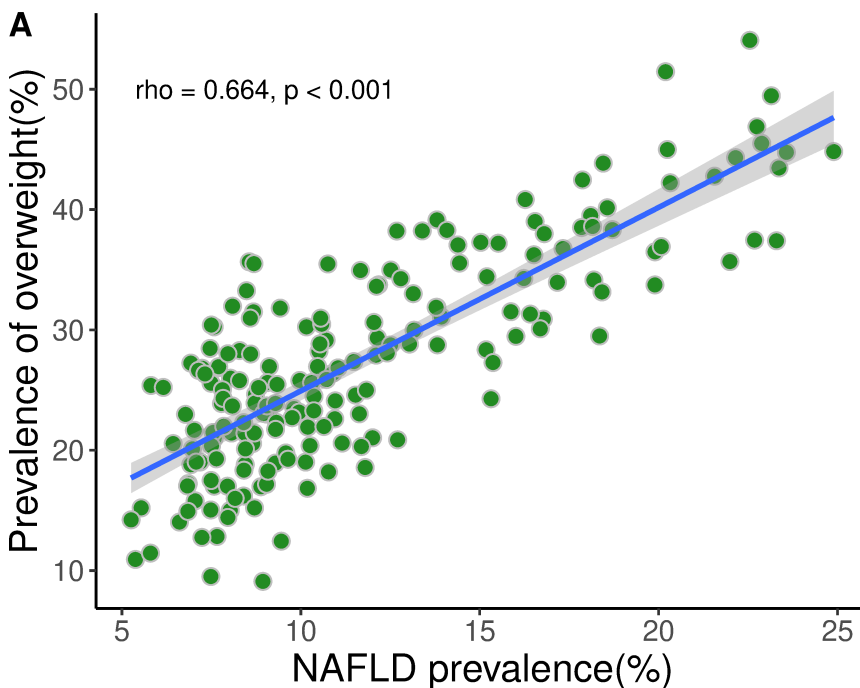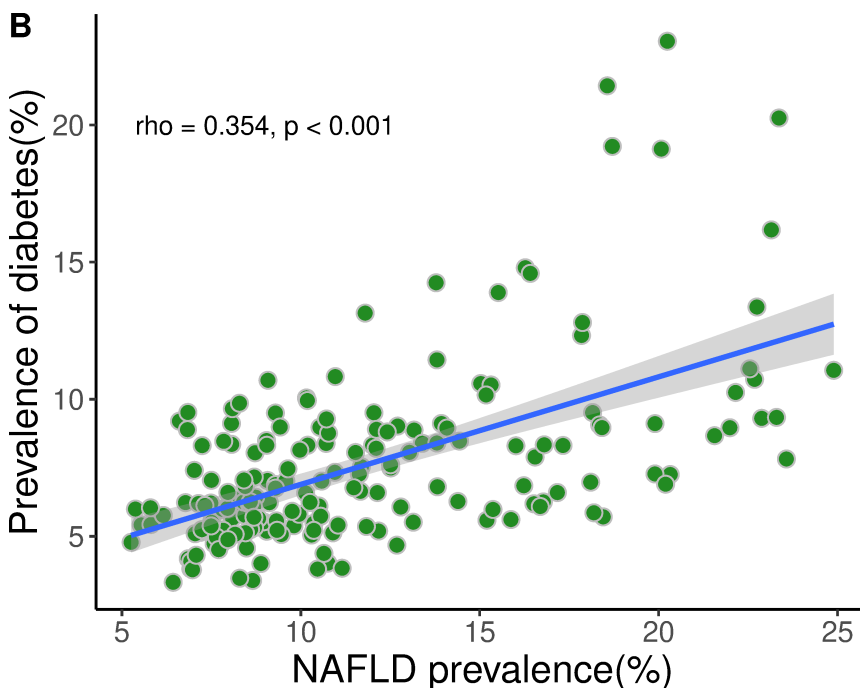

Supplement: bmjopen-2019-036663supp001.pdf [file bmjopen-2019-036663supp001.pdf]
